# Supplementary material for: Nuclear m6A Reader YTHDC1 Promotes Muscle Stem Cell Activation/Proliferation by Regulating mRNA Splicing and Nuclear Export
Source: bioRxiv preprint, doi:10.1101/2022.08.07.503064, version 1 (2022-08-07)
Supplement: suppl table S1 [file 503064_file06.xlsx]

## Sheet: ASC24 DEG
Supplementary Table S1. Transcriptomic changes upon YTHDC1 iKO in ASC.
Differentially expressed genes (DEGs) in ASC-24h
test_id	gene_id	gene	locus	sample_1	sample_2	status	value_1	value_2	log2(fold_change)	test_stat	p_value	q_value	significant
XLOC_000010	XLOC_000010	Adhfe1	chr1:9538028-9621173	KO	WT	OK	1.09473	0.0961435	-3.50924	-2.26571	0.0367	0.851931	no
XLOC_000112	XLOC_000112	Col3a1	chr1:45368382-45406551	KO	WT	OK	7.35121	28.5096	1.95539	3.7099	0.0008	0.159715	no
XLOC_000131	XLOC_000131	Mars2	chr1:55294020-55296902	KO	WT	OK	3.21349	17.4067	2.43743	3.35417	0.00325	0.275282	no
XLOC_000139	XLOC_000139	Sgo2a	chr1:58042183-58083121	KO	WT	OK	0.67449	5.63806	3.06333	3.60198	0.00315	0.27525	no
XLOC_000168	XLOC_000168	Nrp2	chr1:62749890-62865266	KO	WT	OK	3.10464	8.06731	1.37766	2.12199	0.03805	0.8634	no
XLOC_000182	XLOC_000182	Map2	chr1:66221902-66489157	KO	WT	OK	0.745668	2.69497	1.85366	2.1348	0.04145	0.887894	no
XLOC_000224	XLOC_000224	Des	chr1:75356866-75371590	KO	WT	OK	113.132	226.835	1.00363	2.35989	0.01675	0.588526	no
XLOC_000267	XLOC_000267	Ptma	chr1:88423131-88427286	KO	WT	OK	455.432	1016.96	1.15896	2.73677	0.0065	0.383638	no
XLOC_000273	XLOC_000273	Chrng	chr1:89102385-89108410	KO	WT	OK	0.774791	4.39191	2.50297	2.52948	0.03205	0.810084	no
XLOC_000330	XLOC_000330	Bok	chr1:95582151-95592347	KO	WT	OK	10.2147	32.8822	1.68666	2.50839	0.0182	0.595474	no
XLOC_000410	XLOC_000410	Nuak2	chr1:134212701-134230065	KO	WT	OK	12.5906	3.97279	-1.66412	-2.37709	0.02265	0.677095	no
XLOC_000427	XLOC_000427	Myog	chr1:136186580-136189125	KO	WT	OK	0.515886	6.23576	3.59544	3.45719	0.0162	0.588526	no
XLOC_000433	XLOC_000433	Kdm5b	chr1:136456754-136529455	KO	WT	OK	12.6398	5.30532	-1.25246	-2.15883	0.03655	0.851931	no
XLOC_000435	XLOC_000435	Ube2t	chr1:136859141-136870756	KO	WT	OK	2.16784	10.6286	2.29362	2.48515	0.01815	0.595474	no
XLOC_000440	XLOC_000440	Csrp1	chr1:137616639-137648806	KO	WT	OK	12.4529	30.5714	1.2957	2.05355	0.03885	0.868334	no
XLOC_000442	XLOC_000442	Tnni1	chr1:137695997-137707566	KO	WT	OK	0	1.27736	inf	#NAME?	0.00115	0.1748	no
XLOC_000444	XLOC_000444	Tnnt2	chr1:137732910-137748845	KO	WT	OK	10.8028	36.9395	1.77376	2.61437	0.01075	0.473341	no
XLOC_000450	XLOC_000450	Kif14	chr1:138364424-138427396	KO	WT	OK	0.0756861	1.38326	4.1919	3.95009	0.01225	0.506557	no
XLOC_000462	XLOC_000462	Aspm	chr1:141351349-141390665	KO	WT	OK	0.278161	2.63991	3.2465	3.85905	0.0015	0.198143	no
XLOC_000512	XLOC_000512	Gas5	chr1:162965046-162968670	KO	WT	OK	225.899	103.096	-1.13169	-2.15661	0.0314	0.797287	no
XLOC_000583	XLOC_000583	Igsf8	chr1:174242497-174249974	KO	WT	OK	14.9234	34.4379	1.20643	2.0923	0.04265	0.894602	no
XLOC_000588	XLOC_000588	Tagln2	chr1:174430376-174437506	KO	WT	OK	136.919	358.322	1.38793	3.12155	0.00295	0.263977	no
XLOC_000607	XLOC_000607	Spta1	chr1:176102906-176178580	KO	WT	OK	0.199353	1.18938	2.57681	2.64861	0.02485	0.706625	no
XLOC_000616	XLOC_000616	Exo1	chr1:177810908-177841527	KO	WT	OK	2.11624	10.2956	2.28246	3.36032	0.0026	0.248703	no
XLOC_000665	XLOC_000665	Ptpn14	chr1:191552146-191700572	KO	WT	OK	47.8351	21.0539	-1.18398	-2.72944	0.0064	0.381798	no
XLOC_000671	XLOC_000671	Nsl1	chr1:192886899-192908437	KO	WT	OK	1.8598	10.2604	2.46386	3.10579	0.0086	0.427917	no
XLOC_000677	XLOC_000677	Nek2	chr1:193645351-193656928	KO	WT	OK	0.438279	8.04873	4.19884	4.56343	0.0041	0.318137	no
XLOC_000686	XLOC_000686	Lamb3	chr1:195128187-195170072	KO	WT	OK	2.33757	6.67034	1.51275	2.0738	0.03375	0.824868	no
XLOC_000689	XLOC_000689	Cd34	chr1:196765014-196803153	KO	WT	OK	127.339	53.4326	-1.25288	-2.75306	0.0071	0.401947	no
XLOC_000732	XLOC_000732	Mcm3	chr1:20793048-20810393	KO	WT	OK	46.6309	133.694	1.51958	3.35662	0.00195	0.217569	no
XLOC_000755	XLOC_000755	Prim2	chr1:33510652-33726639	KO	WT	OK	8.78224	24.7211	1.49308	2.2483	0.0258	0.722076	no
XLOC_000760	XLOC_000760	Bend6	chr1:33908896-33964612	KO	WT	OK	0.332273	2.5287	2.92795	2.61883	0.02605	0.724246	no
XLOC_000861	XLOC_000861	Ino80d	chr1:63094374-63160841	KO	WT	OK	10.3583	4.8114	-1.10625	-2.13114	0.0334	0.824803	no
XLOC_000887	XLOC_000887	Bard1	chr1:71074108-71149546	KO	WT	OK	1.5808	7.78111	2.29932	3.10096	0.00395	0.310845	no
XLOC_000900	XLOC_000900	Tns1	chr1:73956805-74171122	KO	WT	OK	2.32877	5.24218	1.1706	1.90125	0.04845	0.950107	no
XLOC_000922	XLOC_000922	Ptprn	chr1:75243615-75260783	KO	WT	OK	0.314869	3.89256	3.62789	3.91479	0.0064	0.381798	no
XLOC_000927	XLOC_000927	Obsl1	chr1:75482399-75503027	KO	WT	OK	2.9572	10.8439	1.87458	2.63082	0.013	0.517018	no
XLOC_000974	XLOC_000974	6430706D22Rik,A730008H23Rik,Hjurp	chr1:90123594-90174154	KO	WT	OK	31.0879	73.494	1.24127	2.4549	0.0125	0.506557	no
XLOC_001002	XLOC_001002	Pask	chr1:95202540-95239365	KO	WT	OK	1.40151	4.29036	1.61411	2.08095	0.0383	0.863774	no
XLOC_001060	XLOC_001060	Mcm6	chr1:130228151-130256282	KO	WT	OK	31.9168	119.282	1.90199	4.02679	0.00025	0.0956552	no
XLOC_001092	XLOC_001092	Btg2	chr1:135971441-135975732	KO	WT	OK	38.2577	12.4039	-1.62496	-2.85602	0.00745	0.409234	no
XLOC_001149	XLOC_001149	1700025G04Rik	chr1:153731653-153937450	KO	WT	OK	0.92738	2.98905	1.68845	2.24218	0.03475	0.829819	no
XLOC_001192	XLOC_001192	Zbtb37	chr1:162938922-162964980	KO	WT	OK	8.61257	2.23875	-1.94375	-2.52225	0.01815	0.595474	no
XLOC_001239	XLOC_001239	Nuf2	chr1:171428064-171461595	KO	WT	OK	0.647755	10.7416	4.05162	4.54437	0.00085	0.159715	no
XLOC_001307	XLOC_001307	Chml	chr1:177592552-177622763	KO	WT	OK	1.43189	9.59989	2.7451	2.80341	0.0204	0.634057	no
XLOC_001331	XLOC_001331	Lbr	chr1:183745445-183772532	KO	WT	OK	19.9175	42.2981	1.08655	2.09994	0.04125	0.885319	no
XLOC_001358	XLOC_001358	Cenpf	chr1:191464492-191511965	KO	WT	OK	0.305283	4.28937	3.81255	4.83723	0.0005	0.132095	no
XLOC_001370	XLOC_001370	Dtl	chr1:193361234-193399423	KO	WT	OK	5.39232	28.3048	2.39207	3.98348	0.00035	0.104962	no
XLOC_001394	XLOC_001394	Fbxo5	chr10:4541075-4547383	KO	WT	OK	2.99476	27.2142	3.18385	4.09383	0.00115	0.1748	no
XLOC_001417	XLOC_001417	Hymai,Plagl1	chr10:12810637-12851501	KO	WT	OK	7.60031	18.4202	1.27716	2.22837	0.0265	0.724246	no
XLOC_001421	XLOC_001421	Hivep2	chr10:13685880-13871184	KO	WT	OK	16.2905	7.73048	-1.0754	-2.14943	0.0337	0.824868	no
XLOC_001441	XLOC_001441	Mtfr2	chr10:20067624-20081475	KO	WT	OK	0.716151	5.17778	2.854	2.91769	0.01615	0.588526	no
XLOC_001540	XLOC_001540	Vgll2	chr10:51742307-51748277	KO	WT	OK	19.2122	44.0258	1.19633	2.04697	0.0408	0.879062	no
XLOC_001596	XLOC_001596	Dna2	chr10:62409776-62436936	KO	WT	OK	2.40024	9.08067	1.91962	2.6947	0.0126	0.506557	no
XLOC_001707	XLOC_001707	Cnn2	chr10:79451344-79458145	KO	WT	OK	20.5532	58.8006	1.51647	2.72239	0.01015	0.461575	no
XLOC_001719	XLOC_001719	Dazap1	chr10:79727735-79751158	KO	WT	OK	46.8022	94.0009	1.0061	2.07452	0.0342	0.826761	no
XLOC_001868	XLOC_001868	E2f7	chr10:110182494-110224440	KO	WT	OK	0.659565	5.55779	3.07493	3.76887	0.0016	0.201745	no
XLOC_001926	XLOC_001926	Cyp27b1	chr10:126485301-126490062	KO	WT	OK	1.64313	0.270423	-2.60316	-2.32629	0.04825	0.950107	no
XLOC_001951	XLOC_001951	Prim1	chr10:127452270-127467086	KO	WT	OK	12.9113	47.6831	1.88485	2.89595	0.00625	0.378962	no
XLOC_001959	XLOC_001959	Timeless	chr10:127669118-127689997	KO	WT	OK	5.99533	18.0221	1.58785	2.64303	0.0124	0.506557	no
XLOC_002088	XLOC_002088	Cenpw	chr10:29915814-29920346	KO	WT	OK	1.16231	8.00104	2.78319	2.68859	0.0252	0.711499	no
XLOC_002111	XLOC_002111	Fam229b	chr10:38838609-38853720	KO	WT	OK	3.31103	0.559253	-2.56571	-1.18794	0.01805	0.595474	no
XLOC_002211	XLOC_002211	Cdk1	chr10:68797895-68815660	KO	WT	OK	1.16991	21.933	4.22863	5.71404	0.0002	0.0821926	no
XLOC_002230	XLOC_002230	Gstt2	chr10:75294589-75297626	KO	WT	OK	2.92884	0.485052	-2.59412	-2.31295	0.0474	0.944256	no
XLOC_002262	XLOC_002262	Pfkl	chr10:77449693-77472552	KO	WT	OK	18.0402	36.3502	1.01075	2.02881	0.04525	0.922967	no
XLOC_002284	XLOC_002284	Shc2	chr10:79080682-79100663	KO	WT	OK	0.159728	1.16368	2.86501	2.62687	0.03365	0.824868	no
XLOC_002314	XLOC_002314	Jsrp1	chr10:80271240-80276243	KO	WT	OK	10.3089	30.0895	1.54537	2.11473	0.0445	0.911018	no
XLOC_002318	XLOC_002318	Lmnb2	chr10:80364107-80380990	KO	WT	OK	25.7504	51.6891	1.00527	2.09614	0.0366	0.851931	no
XLOC_002356	XLOC_002356	Ckap4	chr10:83989049-83996633	KO	WT	OK	30.6797	75.8757	1.30635	2.73663	0.00725	0.405004	no
XLOC_002368	XLOC_002368	Parpbp	chr10:87553816-87609686	KO	WT	OK	0.315701	2.97357	3.23557	3.16114	0.0142	0.549001	no
XLOC_002376	XLOC_002376	Gas2l3	chr10:88871567-88906712	KO	WT	OK	0.13811	1.24836	3.17614	3.13729	0.031	0.797287	no
XLOC_002425	XLOC_002425	Myf5	chr10:106919963-106923190	KO	WT	OK	42.4956	89.6334	1.07672	2.16198	0.0397	0.870575	no
XLOC_002460	XLOC_002460	Mdm2	chr10:117125930-117147814	KO	WT	OK	320.448	97.4196	-1.71781	-4.02346	5e-05	0.0504364	no
XLOC_002536	XLOC_002536	Cdk2	chr10:128134994-128142107	KO	WT	OK	16.6602	39.384	1.2412	2.19061	0.03105	0.797287	no
XLOC_002600	XLOC_002600	Lif	chr11:4157570-4172517	KO	WT	OK	17.108	4.69862	-1.86437	-2.94402	0.00525	0.353055	no
XLOC_002633	XLOC_002633	Egfr	chr11:16652205-16813910	KO	WT	OK	59.8984	28.605	-1.06625	-2.16701	0.0278	0.748711	no
XLOC_002634	XLOC_002634	Fbxo48	chr11:16851377-16854775	KO	WT	OK	0.338638	2.69408	2.99197	2.44009	0.0423	0.894021	no
XLOC_002843	XLOC_002843	Trim11	chr11:58791594-58804964	KO	WT	OK	42.8301	20.1058	-1.09101	-2.03594	0.0484	0.950107	no
XLOC_002875	XLOC_002875	Specc1	chr11:61770264-62036515	KO	WT	OK	0.448102	1.84271	2.03993	2.3473	0.0318	0.8056	no
XLOC_002881	XLOC_002881	2410006H16Rik	chr11:62416378-62418308	KO	WT	OK	448.212	160.125	-1.48498	-2.70685	0.00835	0.427917	no
XLOC_002887	XLOC_002887	Fbxw10	chr11:62660624-62690964	KO	WT	OK	1.7106	0.204572	-3.06383	-2.72705	0.02585	0.722076	no
XLOC_002919	XLOC_002919	Myh10	chr11:68505416-68630126	KO	WT	OK	4.76148	12.261	1.36459	2.4659	0.0196	0.619606	no
XLOC_002924	XLOC_002924	Aurkb	chr11:68859138-68865166	KO	WT	OK	1.39025	27.7569	4.31943	5.38858	0.00035	0.104962	no
XLOC_002975	XLOC_002975	Eno3	chr11:70470677-70476015	KO	WT	OK	37.7041	84.6087	1.16609	2.20984	0.0303	0.790525	no
XLOC_002983	XLOC_002983	Pimreg	chr11:71856003-71860872	KO	WT	OK	0.423924	7.64285	4.17223	4.02364	0.0122	0.506557	no
XLOC_003030	XLOC_003030	Smyd4	chr11:75161934-75219207	KO	WT	OK	6.09459	19.5123	1.67878	2.74758	0.00885	0.432597	no
XLOC_003073	XLOC_003073	Spag5	chr11:78115092-78135959	KO	WT	OK	0.779027	7.81678	3.32683	4.0757	0.0013	0.187245	no
XLOC_003091	XLOC_003091	Atad5	chr11:79902901-79949293	KO	WT	OK	2.20277	8.06583	1.87251	2.85433	0.0063	0.379917	no
XLOC_003102	XLOC_003102	Ccl2	chr11:81849078-81850954	KO	WT	OK	25.9016	2.82481	-3.19681	-3.37016	0.0093	0.442888	no
XLOC_003123	XLOC_003123	Taf15	chr11:83286609-83320245	KO	WT	OK	29.611	67.279	1.18402	2.27809	0.028	0.750454	no
XLOC_003148	XLOC_003148	Ptrh2	chr11:86497575-86505959	KO	WT	OK	5.81216	19.4359	1.74158	2.5618	0.0153	0.571612	no
XLOC_003264	XLOC_003264	Wipf2	chr11:98724911-98766892	KO	WT	OK	10.1977	4.67471	-1.1253	-1.9594	0.04985	0.959421	no
XLOC_003265	XLOC_003265	Cdc6	chr11:98769114-98785256	KO	WT	OK	2.27007	20.3221	3.16224	4.73524	0.00015	0.0821926	no
XLOC_003320	XLOC_003320	Hrob	chr11:102110195-102126497	KO	WT	OK	0.619076	7.47776	3.59442	3.86986	0.005	0.348931	no
XLOC_003349	XLOC_003349	Mrc2	chr11:105153959-105212459	KO	WT	OK	1.76089	6.81738	1.95291	2.71219	0.0169	0.588526	no
XLOC_003372	XLOC_003372	Axin2	chr11:108781662-108812095	KO	WT	OK	3.39783	0.847202	-2.00384	-2.33697	0.0262	0.724246	no
XLOC_003380	XLOC_003380	Map2k6	chr11:110260415-110386836	KO	WT	OK	1.09353	0.113993	-3.26198	-1.55423	0.04365	0.902971	no
XLOC_003400	XLOC_003400	Cdr2l	chr11:115243229-115257446	KO	WT	OK	4.82806	12.2867	1.34758	2.08066	0.0424	0.89443	no
XLOC_003444	XLOC_003444	Birc5	chr11:117710550-117717057	KO	WT	OK	3.62639	43.0569	3.56964	4.06755	0.0014	0.191783	no
XLOC_003451	XLOC_003451	Cbx2	chr11:118884334-118892589	KO	WT	OK	0.638162	4.30775	2.75494	3.03552	0.01235	0.506557	no
XLOC_003473	XLOC_003473	Slc25a10	chr11:120353150-120362475	KO	WT	OK	4.22586	11.2888	1.41758	2.16268	0.03485	0.829819	no
XLOC_003481	XLOC_003481	Slc16a3	chr11:120809797-120820314	KO	WT	OK	0.979862	4.46042	2.18653	2.37289	0.0265	0.724246	no
XLOC_003533	XLOC_003533	Purb	chr11:6367601-6376079	KO	WT	OK	52.2345	113.081	1.11428	2.62538	0.01185	0.503784	no
XLOC_003549	XLOC_003549	Fignl1	chr11:11700290-11708965	KO	WT	OK	6.28884	28.4559	2.17786	3.43715	0.00205	0.218719	no
XLOC_003622	XLOC_003622	Hmmr	chr11:40514889-40546939	KO	WT	OK	0.619894	6.26077	3.33625	3.68485	0.00425	0.320803	no
XLOC_003631	XLOC_003631	Adra1b	chr11:43588106-43714739	KO	WT	OK	0.533524	2.11258	1.98538	2.04912	0.04855	0.950107	no
XLOC_003670	XLOC_003670	N4bp3	chr11:51456590-51471183	KO	WT	OK	2.66772	8.49824	1.67155	2.00754	0.0397	0.870575	no
XLOC_003673	XLOC_003673	Jade2	chr11:51626949-51671170	KO	WT	OK	6.27187	1.69604	-1.88672	-2.7088	0.01075	0.473341	no
XLOC_003698	XLOC_003698	Tnip1	chr11:54724288-54776442	KO	WT	OK	32.7733	12.8427	-1.35157	-2.45884	0.0211	0.648547	no
XLOC_003748	XLOC_003748	Med9os	chr11:59760393-59761649	KO	WT	OK	0	1.21224	inf	#NAME?	0.01735	0.588526	no
XLOC_003832	XLOC_003832	Tmem95	chr11:69689555-69691557	KO	WT	OK	30.9249	4.26965	-2.85658	-3.61768	0.00275	0.25642	no
XLOC_003878	XLOC_003878	Haspin	chr11:72904084-72960951	KO	WT	OK	0.728989	5.48229	2.91081	3.02852	0.0143	0.550947	no
XLOC_003909	XLOC_003909	Rpa1	chr11:75113760-75161885	KO	WT	OK	34.3286	95.5935	1.4775	3.17524	0.00175	0.211065	no
XLOC_003910	XLOC_003910	Serpinf1	chr11:75223530-75236125	KO	WT	OK	26.455	124.698	2.23682	4.15927	0.00035	0.104962	no
XLOC_003975	XLOC_003975	Slfn9	chr11:82793804-82805332	KO	WT	OK	0.877934	15.8414	4.17345	5.32483	0.00015	0.0821926	no
XLOC_004006	XLOC_004006	Brip1	chr11:85871637-86014695	KO	WT	OK	0.431523	3.57398	3.05002	3.56744	0.002	0.217569	no
XLOC_004018	XLOC_004018	Prr11	chr11:86902657-86922216	KO	WT	OK	1.12754	6.68058	2.5668	3.08138	0.0055	0.356889	no
XLOC_004027	XLOC_004027	Dynll2	chr11:87793026-87811800	KO	WT	OK	27.7672	78.5796	1.50077	2.96914	0.00435	0.321784	no
XLOC_004092	XLOC_004092	Epop	chr11:97488700-97491030	KO	WT	OK	3.50772	10.8232	1.62552	2.12969	0.03315	0.824132	no
XLOC_004113	XLOC_004113	Nr1d1	chr11:98603098-98636691	KO	WT	OK	93.1289	33.232	-1.48666	-2.96768	0.004	0.312563	no
XLOC_004116	XLOC_004116	Top2a	chr11:98854260-98885503	KO	WT	OK	4.04839	56.4869	3.8025	6.57044	5e-05	0.0504364	no
XLOC_004189	XLOC_004189	Cavin1	chr11:100818050-100831931	KO	WT	OK	39.5223	81.7786	1.04906	2.24204	0.02625	0.724246	no
XLOC_004201	XLOC_004201	Brca1	chr11:101350077-101413269	KO	WT	OK	0.930814	8.27774	3.15267	4.08414	0.0017	0.207288	no
XLOC_004229	XLOC_004229	Kif18b	chr11:102766832-102786438	KO	WT	OK	1.33653	9.59974	2.8445	3.64238	0.00295	0.263977	no
XLOC_004267	XLOC_004267	Kpna2	chr11:106849942-106860839	KO	WT	OK	30.5797	68.2328	1.15789	2.20936	0.03345	0.824803	no
XLOC_004352	XLOC_004352	Tk1	chr11:117676832-117701222	KO	WT	OK	2.51299	33.8053	3.74977	3.9396	0.0028	0.256767	no
XLOC_004375	XLOC_004375	Cep131	chr11:119925743-119948141	KO	WT	OK	0.832792	3.49774	2.07039	2.41838	0.0224	0.671758	no
XLOC_004379	XLOC_004379	2900052L18Rik	chr11:120086842-120092931	KO	WT	OK	3.10571	0.923243	-1.75014	-2.13302	0.04905	0.956518	no
XLOC_004400	XLOC_004400	Dcxr	chr11:120585859-120588598	KO	WT	OK	22.4196	7.73329	-1.53561	-2.13767	0.0393	0.870405	no
XLOC_004472	XLOC_004472	Rrm2	chr12:25393118-25399011	KO	WT	OK	68.7375	274.197	1.99604	4.42759	0.00015	0.0821926	no
XLOC_004561	XLOC_004561	Lrr1	chr12:70269800-70279999	KO	WT	OK	0.962106	8.98232	3.22282	2.86858	0.03025	0.790525	no
XLOC_004624	XLOC_004624	Susd6	chr12:81891518-81981820	KO	WT	OK	60.3211	23.883	-1.33668	-2.88819	0.00355	0.291784	no
XLOC_004633	XLOC_004633	Dcaf4	chr12:84861415-84882942	KO	WT	OK	22.9623	9.22762	-1.31524	-2.02728	0.0433	0.90142	no
XLOC_004705	XLOC_004705	Dglucy	chr12:102017266-102110820	KO	WT	OK	55.0181	27.295	-1.01127	-2.09255	0.03955	0.870575	no
XLOC_004863	XLOC_004863	Tedc1	chr12:114394631-114403669	KO	WT	OK	1.1233	6.53809	2.54113	3.06342	0.00775	0.415443	no
XLOC_004864	XLOC_004864	Tmem121	chr12:114424113-114427733	KO	WT	OK	0.589922	5.49324	3.21906	3.06869	0.0212	0.649821	no
XLOC_004870	XLOC_004870	Ncapg2	chr12:117643908-117702005	KO	WT	OK	2.81952	20.0682	2.83139	4.57384	0.00035	0.104962	no
XLOC_004874	XLOC_004874	Cdca7l	chr12:119082333-119437516	KO	WT	OK	4.10852	15.7145	1.93541	2.5954	0.01745	0.588526	no
XLOC_004899	XLOC_004899	Gen1	chr12:11245743-11272613	KO	WT	OK	0.569492	4.87388	3.09733	3.61396	0.00225	0.231167	no
XLOC_004911	XLOC_004911	Lpin1	chr12:16542474-16617772	KO	WT	OK	1.89507	0.563254	-1.7504	-1.94972	0.04855	0.950107	no
XLOC_004915	XLOC_004915	Kcnf1	chr12:17178905-17183694	KO	WT	OK	7.54513	18.3693	1.28368	2.28745	0.02645	0.724246	no
XLOC_004935	XLOC_004935	Sox11	chr12:28019132-28027583	KO	WT	OK	1.77839	10.4461	2.55432	3.85981	0.0009	0.159715	no
XLOC_004953	XLOC_004953	Prkar2b	chr12:32643335-32746142	KO	WT	OK	6.54325	18.9729	1.53586	2.31904	0.0254	0.715326	no
XLOC_005014	XLOC_005014	Mis18bp1	chr12:66233720-66273567	KO	WT	OK	0.42123	4.7826	3.50511	3.67978	0.00505	0.350217	no
XLOC_005100	XLOC_005100	Ltbp2	chr12:86124161-86220705	KO	WT	OK	83.3133	26.0066	-1.67967	-3.7707	0.00015	0.0821926	no
XLOC_005285	XLOC_005285	Gli3	chr13:15555555-15821858	KO	WT	OK	4.45689	10.2768	1.20528	2.15948	0.0369	0.853005	no
XLOC_005304	XLOC_005304	H3c10	chr13:21809496-21809984	KO	WT	OK	0	1.14011	inf	#NAME?	0.0259	0.722076	no
XLOC_005305	XLOC_005305	H2bc14	chr13:21813912-21814395	KO	WT	OK	0	1.69125	inf	#NAME?	0.01735	0.588526	no
XLOC_005310	XLOC_005310	Hist1h4m	chr13:21903614-21904019	KO	WT	OK	1.54256	0	#NAME?	#NAME?	0.04385	0.904386	no
XLOC_005314	XLOC_005314	H2bc12	chr13:22127689-22128189	KO	WT	OK	0	1.55989	inf	#NAME?	0.01735	0.588526	no
XLOC_005338	XLOC_005338	H4c8	chr13:23622912-23623347	KO	WT	OK	40.3835	6.43697	-2.64931	-2.68908	0.0242	0.698904	no
XLOC_005347	XLOC_005347	H2bc4	chr13:23776067-23784349	KO	WT	OK	131.938	22.3762	-2.55982	-3.43125	0.00255	0.2482	no
XLOC_005351	XLOC_005351	H2ac4	chr13:23842956-23843461	KO	WT	OK	0	1.34815	inf	#NAME?	0.01735	0.588526	no
XLOC_005385	XLOC_005385	Mboat1	chr13:30228358-30338563	KO	WT	OK	2.62823	12.1252	2.20584	2.90169	0.00585	0.364672	no
XLOC_005432	XLOC_005432	Hivep1	chr13:42147389-42280395	KO	WT	OK	9.22283	4.35384	-1.08292	-1.96826	0.04975	0.959421	no
XLOC_005446	XLOC_005446	Rbm24	chr13:46513668-46526468	KO	WT	OK	5.32952	14.4337	1.43736	2.09909	0.0428	0.896054	no
XLOC_005506	XLOC_005506	Txndc15	chr13:55816010-55827588	KO	WT	OK	4.48438	18.0576	2.00963	2.49784	0.0245	0.70246	no
XLOC_005524	XLOC_005524	Dapk1	chr13:60703307-60864552	KO	WT	OK	9.71144	2.63747	-1.88053	-2.83621	0.00805	0.421334	no
XLOC_005526	XLOC_005526	Zfp808	chr13:62231249-62275296	KO	WT	OK	0.293037	1.80733	2.6247	2.46691	0.03735	0.856794	no
XLOC_005604	XLOC_005604	Dhfr	chr13:92981832-93159008	KO	WT	OK	1.2306	11.7833	3.2593	3.09541	0.0187	0.604652	no
XLOC_005625	XLOC_005625	Gcnt4	chr13:97694643-97720869	KO	WT	OK	0.588037	2.68133	2.18897	2.48297	0.01715	0.588526	no
XLOC_005759	XLOC_005759	Hist1h2ao	chr13:21924892-21925444	KO	WT	OK	0	3.21887	inf	#NAME?	0.0009	0.159715	no
XLOC_005764	XLOC_005764	H2ac11	chr13:22134346-22134818	KO	WT	OK	0	7.19777	inf	#NAME?	0.0002	0.0821926	no
XLOC_005797	XLOC_005797	H3c3	chr13:23836910-23837390	KO	WT	OK	0	14.2559	inf	#NAME?	5e-05	0.0504364	no
XLOC_005805	XLOC_005805	Gmnn	chr13:24843713-24853806	KO	WT	OK	4.59906	33.0048	2.84327	3.45627	0.0036	0.293718	no
XLOC_005882	XLOC_005882	Dek	chr13:47138867-47201589	KO	WT	OK	54.247	121.457	1.16283	2.29048	0.02135	0.65155	no
XLOC_005952	XLOC_005952	Hnrnpa0	chr13:58227239-58229917	KO	WT	OK	147.911	310.432	1.06955	2.48361	0.01555	0.575075	no
XLOC_006000	XLOC_006000	Zfp367	chr13:64234329-64254507	KO	WT	OK	6.21639	28.5691	2.2003	3.50241	0.00185	0.213829	no
XLOC_006052	XLOC_006052	Trip13	chr13:74049909-74075215	KO	WT	OK	6.18594	23.1699	1.90518	2.79921	0.0091	0.439517	no
XLOC_006140	XLOC_006140	Cenph	chr13:101529628-101545854	KO	WT	OK	1.00001	11.0088	3.46057	3.58848	0.00955	0.447117	no
XLOC_006141	XLOC_006141	Ccnb1	chr13:101548693-101556441	KO	WT	OK	1.5327	23.9971	3.96871	4.95508	0.0002	0.0821926	no
XLOC_006170	XLOC_006170	Gpx8	chr13:113825586-113881343	KO	WT	OK	223.967	100.849	-1.15109	-2.35506	0.0166	0.588526	no
XLOC_006178	XLOC_006178	Fst	chr13:115242469-115249159	KO	WT	OK	6.34093	1.13158	-2.48636	-2.7896	0.023	0.682034	no
XLOC_006320	XLOC_006320	Nt5dc2	chr14:31944274-31981827	KO	WT	OK	10.9886	38.9394	1.82523	2.77088	0.01125	0.487617	no
XLOC_006435	XLOC_006435	Abhd4	chr14:54873803-54888844	KO	WT	OK	71.6748	29.1388	-1.29853	-2.61541	0.01025	0.462333	no
XLOC_006458	XLOC_006458	Pck2	chr14:56159102-56168857	KO	WT	OK	4.34974	12.0023	1.46431	2.1342	0.0423	0.894021	no
XLOC_006529	XLOC_006529	Pbk	chr14:66424747-66436659	KO	WT	OK	1.84705	36.9546	4.32246	4.97548	0.0008	0.159715	no
XLOC_006630	XLOC_006630	Gpc6	chr14:117324518-118378751	KO	WT	OK	0.331081	1.28656	1.95827	2.08074	0.03745	0.856794	no
XLOC_006818	XLOC_006818	Wdhd1	chr14:47860618-47896532	KO	WT	OK	4.75699	18.8044	1.98295	3.22241	0.0026	0.248703	no
XLOC_006819	XLOC_006819	Dlgap5	chr14:48007453-48038082	KO	WT	OK	0.69096	5.19817	2.91133	3.14252	0.0102	0.461956	no
XLOC_006881	XLOC_006881	Haus4	chr14:55160621-55173198	KO	WT	OK	5.59689	20.0247	1.83908	2.4719	0.01895	0.605963	no
XLOC_006945	XLOC_006945	Ska3	chr14:58425397-58445000	KO	WT	OK	1.63884	7.64712	2.22224	2.56075	0.01645	0.588526	no
XLOC_006988	XLOC_006988	Esco2	chr14:66437863-66452806	KO	WT	OK	0.51959	6.82942	3.71632	3.88369	0.0067	0.385198	no
XLOC_007000	XLOC_007000	Cdca2	chr14:68294410-68333898	KO	WT	OK	0.585002	7.40292	3.66158	4.19064	0.00185	0.213829	no
XLOC_007064	XLOC_007064	Diaph3	chr14:87055163-87541031	KO	WT	OK	0.690975	7.38894	3.41866	4.16897	0.00095	0.159715	no
XLOC_007073	XLOC_007073	Tbc1d4	chr14:101841576-102008408	KO	WT	OK	1.04175	3.75419	1.84949	2.39474	0.0182	0.595474	no
XLOC_007075	XLOC_007075	Kctd12	chr14:103375797-103381854	KO	WT	OK	4.73217	12.0781	1.35181	2.18341	0.03825	0.863774	no
XLOC_007132	XLOC_007132	Gdnf	chr15:7760047-7787580	KO	WT	OK	37.4813	14.6533	-1.35494	-2.69069	0.00845	0.427917	no
XLOC_007147	XLOC_007147	C1qtnf3	chr15:10882086-10909917	KO	WT	OK	0.776213	5.1742	2.73681	2.90302	0.00875	0.429602	no
XLOC_007301	XLOC_007301	Gpt	chr15:76527155-76530105	KO	WT	OK	6.84463	0.93894	-2.86587	-2.91189	0.0156	0.575075	no
XLOC_007395	XLOC_007395	Fbln1	chr15:85036378-85116724	KO	WT	OK	0.441977	3.13959	2.82853	2.94268	0.01615	0.588526	no
XLOC_007401	XLOC_007401	Gtse1	chr15:85690136-85707003	KO	WT	OK	60.1179	28.3776	-1.08304	-2.23763	0.02465	0.704939	no
XLOC_007456	XLOC_007456	Troap	chr15:98905403-98913840	KO	WT	OK	0.396668	4.93694	3.63761	3.6255	0.0067	0.385198	no
XLOC_007505	XLOC_007505	Espl1	chr15:102126723-102154787	KO	WT	OK	0.710448	10.1091	3.83078	4.96949	0.0004	0.113805	no
XLOC_007547	XLOC_007547	Skp2	chr15:9041738-9127206	KO	WT	OK	7.9853	24.7653	1.6329	2.41386	0.02	0.628669	no
XLOC_007634	XLOC_007634	Dscc1	chr15:54907655-54922046	KO	WT	OK	0.970519	8.88842	3.1951	3.32581	0.00925	0.442405	no
XLOC_007643	XLOC_007643	Atad2	chr15:57925601-57966637	KO	WT	OK	6.83412	37.5345	2.45739	4.52749	0.0002	0.0821926	no
XLOC_007739	XLOC_007739	Tonsl	chr15:76456666-76470359	KO	WT	OK	1.02254	6.99879	2.77495	3.53055	0.0032	0.27525	no
XLOC_007742	XLOC_007742	Recql4	chr15:76531971-76540989	KO	WT	OK	0.983811	6.85863	2.80147	2.58011	0.0348	0.829819	no
XLOC_007818	XLOC_007818	Pmm1	chr15:81781535-81791360	KO	WT	OK	116.368	43.7195	-1.41234	-2.72226	0.0079	0.415443	no
XLOC_007844	XLOC_007844	1700001L05Rik	chr15:83184276-83197727	KO	WT	OK	0.467633	1.83828	1.97491	2.14915	0.0377	0.858972	no
XLOC_007964	XLOC_007964	Racgap1	chr15:99450927-99482087	KO	WT	OK	3.18475	26.3121	3.04647	4.42727	0.0006	0.14473	no
XLOC_007983	XLOC_007983	Krt80	chr15:101178745-101200593	KO	WT	OK	2.42806	7.92751	1.70707	2.27492	0.0297	0.784646	no
XLOC_008067	XLOC_008067	Rmi2	chr16:10835151-10843328	KO	WT	OK	0.4024	4.401	3.45113	3.61836	0.0061	0.371899	no
XLOC_008242	XLOC_008242	Polq	chr16:37011871-37095503	KO	WT	OK	0.331079	2.74217	3.05007	3.59269	0.00375	0.299353	no
XLOC_008284	XLOC_008284	Cip2a	chr16:48994300-49019818	KO	WT	OK	3.08601	15.3596	2.31533	3.21307	0.0073	0.405004	no
XLOC_008333	XLOC_008333	Cxadr	chr16:78301915-78360030	KO	WT	OK	6.54605	17.8769	1.4494	2.20108	0.0227	0.677095	no
XLOC_008385	XLOC_008385	Chaf1b	chr16:93884145-93906351	KO	WT	OK	4.32338	29.6076	2.77574	3.93851	0.00115	0.1748	no
XLOC_008409	XLOC_008409	Srl	chr16:4480211-4523066	KO	WT	OK	2.13027	6.90704	1.69703	2.2052	0.0442	0.907575	no
XLOC_008413	XLOC_008413	Nmral1	chr16:4711317-4719356	KO	WT	OK	3.75189	14.9409	1.99357	2.45438	0.0171	0.588526	no
XLOC_008460	XLOC_008460	Mcm4	chr16:15623989-15637493	KO	WT	OK	24.7609	84.5695	1.77208	3.74661	0.00075	0.159715	no
XLOC_008499	XLOC_008499	Cdc45	chr16:18780539-18812065	KO	WT	OK	5.22007	26.6675	2.35294	3.37867	0.00285	0.25921	no
XLOC_008777	XLOC_008777	Mis18a	chr16:90719556-90727616	KO	WT	OK	3.1789	16.3421	2.36199	2.69126	0.01215	0.506557	no
XLOC_008822	XLOC_008822	Zbtb21	chr16:98168598-98183787	KO	WT	OK	14.1077	6.00255	-1.23283	-2.06227	0.039	0.868334	no
XLOC_008843	XLOC_008843	Rnaset2b	chr17:7183208-7202542	KO	WT	OK	11.2695	36.2007	1.6836	2.28426	0.0322	0.812025	no
XLOC_008957	XLOC_008957	Pkmyt1	chr17:23863302-23877297	KO	WT	OK	2.48514	15.5549	2.64597	2.78459	0.01715	0.588526	no
XLOC_009056	XLOC_009056	Mapk13	chr17:28906261-28915649	KO	WT	OK	47.5472	15.3875	-1.6276	-2.5546	0.0156	0.575075	no
XLOC_009062	XLOC_009062	Cdkn1a	chr17:29227923-29237667	KO	WT	OK	542.565	242.021	-1.16466	-2.74346	0.00545	0.355725	no
XLOC_009152	XLOC_009152	Ddah2	chr17:35195979-35199044	KO	WT	OK	5.90813	23.9845	2.02133	2.65328	0.01165	0.497186	no
XLOC_009175	XLOC_009175	Cchcr1	chr17:35653993-35667960	KO	WT	OK	4.16043	13.2228	1.66823	2.39605	0.02675	0.725716	no
XLOC_009237	XLOC_009237	Rn45s	chr17:39979941-39985774	KO	WT	OK	4556.62	1620.78	-1.49128	-3.81746	0.0046	0.3358	no
XLOC_009259	XLOC_009259	Nfkbie	chr17:45692648-45700117	KO	WT	OK	16.0794	6.21053	-1.37242	-2.06807	0.0456	0.926019	no
XLOC_009284	XLOC_009284	Ccnd3	chr17:47641999-47748441	KO	WT	OK	34.297	89.6536	1.38628	1.89573	0.04895	0.956249	no
XLOC_009305	XLOC_009305	Btg3	chr17:50838005-50839209	KO	WT	OK	6.11718	1.02676	-2.57477	-2.46922	0.03665	0.851931	no
XLOC_009320	XLOC_009320	Chaf1a	chr17:56179838-56207449	KO	WT	OK	5.12109	31.0109	2.59825	4.28716	0.0001	0.0739733	no
XLOC_009321	XLOC_009321	Hdgfl2	chr17:56219053-56249205	KO	WT	OK	12.7807	32.1951	1.33288	2.29877	0.02425	0.698904	no
XLOC_009326	XLOC_009326	Uhrf1	chr17:56442759-56462909	KO	WT	OK	15.1277	105.254	2.79861	5.55437	5e-05	0.0504364	no
XLOC_009371	XLOC_009371	Lbh	chr17:73267644-73291286	KO	WT	OK	12.7999	42.6786	1.73738	3.12064	0.00275	0.25642	no
XLOC_009416	XLOC_009416	Msh2	chr17:88071871-88123053	KO	WT	OK	8.47378	22.2783	1.39456	2.28625	0.02815	0.752656	no
XLOC_009542	XLOC_009542	Ccnf,Mir5134	chr17:24360176-24388354	KO	WT	OK	3.41437	12.5777	1.88118	2.19851	0.014	0.545067	no
XLOC_009578	XLOC_009578	Chtf18	chr17:25854116-25864360	KO	WT	OK	2.00254	12.8874	2.68606	3.60317	0.00155	0.201745	no
XLOC_009586	XLOC_009586	Wdr90	chr17:25981678-25998460	KO	WT	OK	1.18482	4.76983	2.00927	2.66112	0.01095	0.480242	no
XLOC_009680	XLOC_009680	Kifc1	chr17:34012610-34027578	KO	WT	OK	3.81488	16.2915	2.09441	2.85147	0.0101	0.461192	no
XLOC_009713	XLOC_009713	1110038B12Rik	chr17:35087180-35089416	KO	WT	OK	281.431	113.549	-1.30947	-2.15109	0.0341	0.826143	no
XLOC_009717	XLOC_009717	D17H6S56E-5	chr17:35133668-35137691	KO	WT	OK	7.13902	74.0453	3.37461	5.89755	5e-05	0.0504364	no
XLOC_009731	XLOC_009731	Tcf19	chr17:35649679-35653769	KO	WT	OK	3.39825	23.7787	2.8068	3.6265	0.00325	0.275282	no
XLOC_009737	XLOC_009737	Tubb5	chr17:35970864-35975246	KO	WT	OK	367.185	802.36	1.12774	2.65237	0.0095	0.446661	no
XLOC_009802	XLOC_009802	Cenpq	chr17:41057757-41071523	KO	WT	OK	1.42454	5.2082	1.87028	2.21276	0.03725	0.856794	no
XLOC_009820	XLOC_009820	Slc29a1	chr17:45722148-45736552	KO	WT	OK	48.786	117.72	1.27082	2.59621	0.0094	0.445737	no
XLOC_009876	XLOC_009876	Sgo1	chr17:53814111-53828640	KO	WT	OK	0.620852	6.78116	3.44921	3.76095	0.0037	0.297501	no
XLOC_009898	XLOC_009898	Ptprs	chr17:56551848-56615903	KO	WT	OK	4.09739	12.9276	1.65768	2.78885	0.0086	0.427917	no
XLOC_009958	XLOC_009958	Ndc80	chr17:71845439-71876197	KO	WT	OK	0.720788	7.99681	3.47178	3.69609	0.0073	0.405004	no
XLOC_009975	XLOC_009975	Cebpz	chr17:79315838-79336410	KO	WT	OK	10.2915	39.688	1.94725	3.51127	0.00115	0.1748	no
XLOC_010098	XLOC_010098	Bin1	chr18:32518710-32595394	KO	WT	OK	103.844	208.369	1.00472	2.30388	0.0183	0.595474	no
XLOC_010114	XLOC_010114	Snhg4	chr18:35713063-35717970	KO	WT	OK	88.4757	37.4525	-1.24022	-2.06283	0.03635	0.851931	no
XLOC_010219	XLOC_010219	Lmnb1	chr18:56867466-56913079	KO	WT	OK	22.9375	82.4034	1.845	3.64202	0.0015	0.198143	no
XLOC_010269	XLOC_010269	Pmaip1	chr18:66618257-66625212	KO	WT	OK	16.1387	5.43307	-1.57068	-2.13492	0.04415	0.907575	no
XLOC_010273	XLOC_010273	Impa2	chr18:67448900-67478870	KO	WT	OK	1.40104	6.59785	2.23549	2.36674	0.03645	0.851931	no
XLOC_010407	XLOC_010407	Stard4	chr18:33358791-33373516	KO	WT	OK	0.920513	5.26828	2.51682	3.04124	0.00665	0.385198	no
XLOC_010464	XLOC_010464	Dpysl3	chr18:43480632-43597940	KO	WT	OK	2.25202	10.4266	2.21098	3.14927	0.00575	0.364672	no
XLOC_010471	XLOC_010471	Mcc	chr18:44584713-44971836	KO	WT	OK	6.98142	2.1376	-1.70753	-2.60796	0.0119	0.503979	no
XLOC_010561	XLOC_010561	Ska1	chr18:74354952-74367472	KO	WT	OK	0.155402	2.77336	4.15755	3.38893	0.04845	0.950107	no
XLOC_010567	XLOC_010567	Gm20544	chr18:75518292-75526742	KO	WT	OK	1.0246	6.79031	2.72841	3.17918	0.005	0.348931	no
XLOC_010596	XLOC_010596	Zfp407	chr18:84377093-84758896	KO	WT	OK	11.8227	4.60674	-1.35974	-2.4243	0.01725	0.588526	no
XLOC_010663	XLOC_010663	Cdca5	chr19:6085096-6091773	KO	WT	OK	0.767805	12.4803	4.02277	4.32895	0.0048	0.343618	no
XLOC_010722	XLOC_010722	Fads1	chr19:10257377-10271362	KO	WT	OK	4.00783	16.3272	2.02638	2.94474	0.0087	0.429045	no
XLOC_010758	XLOC_010758	Fam111a	chr19:12647999-12671056	KO	WT	OK	9.10976	40.4973	2.15234	3.71428	0.0013	0.187245	no
XLOC_010796	XLOC_010796	Prune2	chr19:17030607-17298422	KO	WT	OK	0.447113	6.25186	3.80557	5.09036	0.00055	0.1387	no
XLOC_010859	XLOC_010859	Kif20b	chr19:34996847-35050240	KO	WT	OK	0.919525	6.88479	2.90445	3.61603	0.0034	0.285806	no
XLOC_010868	XLOC_010868	Kif11	chr19:37450871-37496353	KO	WT	OK	0.697129	13.0261	4.22383	5.36336	0.0002	0.0821926	no
XLOC_010874	XLOC_010874	Cep55	chr19:38129473-38148915	KO	WT	OK	1.17993	13.2434	3.48851	4.1115	0.00485	0.344972	no
XLOC_010881	XLOC_010881	Hells	chr19:39005479-39042767	KO	WT	OK	10.3429	53.9668	2.38344	4.06268	0.0007	0.155344	no
XLOC_010906	XLOC_010906	Marveld1	chr19:42221878-42226193	KO	WT	OK	2.87363	8.30161	1.53052	2.01015	0.04725	0.94296	no
XLOC_010918	XLOC_010918	Mir5114,Scd2	chr19:44368165-44381352	KO	WT	OK	7.57343	26.1043	1.78527	2.91415	0.0028	0.256767	no
XLOC_010927	XLOC_010927	Lzts2	chr19:45089665-45120262	KO	WT	OK	9.12102	24.0223	1.39711	2.3359	0.0249	0.706625	no
XLOC_011008	XLOC_011008	Gal	chr19:3409914-3414544	KO	WT	OK	68.5301	313.772	2.19491	4.12864	0.0001	0.0739733	no
XLOC_011033	XLOC_011033	Lrfn4	chr19:4510471-4621752	KO	WT	OK	5.7144	16.0004	1.48544	2.0535	0.0399	0.871517	no
XLOC_011052	XLOC_011052	Sart1	chr19:5377522-5402506	KO	WT	OK	12.9463	33.6292	1.37717	2.7343	0.00845	0.427917	no
XLOC_011075	XLOC_011075	Pola2	chr19:5940542-5964206	KO	WT	OK	7.55766	26.9361	1.83353	2.86183	0.00705	0.401163	no
XLOC_011128	XLOC_011128	Incenp	chr19:9946784-9973979	KO	WT	OK	3.31319	23.0579	2.79897	4.17034	0.00095	0.159715	no
XLOC_011130	XLOC_011130	Fads2	chr19:10137254-10175993	KO	WT	OK	0.702494	5.07539	2.85296	3.01211	0.0134	0.527257	no
XLOC_011131	XLOC_011131	Fen1	chr19:10273621-10282314	KO	WT	OK	16.4115	53.3956	1.70202	2.46829	0.02145	0.65155	no
XLOC_011144	XLOC_011144	Tmem132a	chr19:10917033-10944269	KO	WT	OK	7.98964	24.5059	1.61692	2.76763	0.0072	0.405004	no
XLOC_011226	XLOC_011226	2610016A17Rik	chr19:25745623-25746729	KO	WT	OK	1.51852	0	#NAME?	#NAME?	0.0235	0.69166	no
XLOC_011256	XLOC_011256	Acta2	chr19:34314825-34329863	KO	WT	OK	3.57614	27.4561	2.94065	4.19318	0.00115	0.1748	no
XLOC_011338	XLOC_011338	Pitx3	chr19:46206386-46222815	KO	WT	OK	24.2255	61.987	1.35544	2.19634	0.03015	0.790525	no
XLOC_011557	XLOC_011557	Sapcd2	chr2:25227554-25233733	KO	WT	OK	0.113428	2.76702	4.60849	3.78568	0.0368	0.852469	no
XLOC_011596	XLOC_011596	Col5a1	chr2:27741944-27895030	KO	WT	OK	0.891209	4.25842	2.25648	3.11048	0.0057	0.364672	no
XLOC_011662	XLOC_011662	Ak1	chr2:32477277-32490578	KO	WT	OK	64.7648	23.8345	-1.44216	-2.63632	0.0086	0.427917	no
XLOC_011708	XLOC_011708	Lhx2	chr2:38194800-38225257	KO	WT	OK	0.216409	2.14314	3.3079	2.70799	0.03275	0.821555	no
XLOC_011733	XLOC_011733	Arl6ip6	chr2:53051117-53078255	KO	WT	OK	12.3452	29.8344	1.27303	2.01402	0.0492	0.95776	no
XLOC_011771	XLOC_011771	Klhl23	chr2:69659997-69674708	KO	WT	OK	1.49291	5.20537	1.80187	2.21901	0.038	0.8634	no
XLOC_011782	XLOC_011782	Hat1	chr2:71227316-71279679	KO	WT	OK	39.9298	94.1909	1.23812	2.36192	0.021	0.647267	no
XLOC_011990	XLOC_011990	Ccdc34	chr2:109857973-109890636	KO	WT	OK	3.21405	12.0197	1.90293	2.36978	0.02365	0.69204	no
XLOC_012032	XLOC_012032	Bub1b	chr2:118423946-118467328	KO	WT	OK	2.32592	13.8275	2.57167	3.64356	0.00245	0.242725	no
XLOC_012037	XLOC_012037	Knstrn	chr2:118639738-118661948	KO	WT	OK	1.3165	9.02714	2.77756	3.4004	0.00355	0.291784	no
XLOC_012042	XLOC_012042	Knl1	chr2:118872854-118936233	KO	WT	OK	0.352542	3.92353	3.47629	3.87198	0.00225	0.231167	no
XLOC_012043	XLOC_012043	Rad51	chr2:118938549-118961809	KO	WT	OK	5.11767	33.2539	2.69996	3.75122	0.00235	0.234915	no
XLOC_012053	XLOC_012053	Nusap1	chr2:119435267-119475896	KO	WT	OK	0.557502	4.95652	3.15228	2.62099	0.0312	0.797287	no
XLOC_012076	XLOC_012076	Wdr76	chr2:121332458-121370595	KO	WT	OK	5.10016	14.6908	1.5263	2.39047	0.01875	0.604652	no
XLOC_012096	XLOC_012096	Dut	chr2:125072983-125084785	KO	WT	OK	17.6849	63.6564	1.84779	3.28479	0.0023	0.234136	no
XLOC_012159	XLOC_012159	Mcm8	chr2:132641876-132669924	KO	WT	OK	2.21148	6.6285	1.58367	2.02058	0.0449	0.917515	no
XLOC_012223	XLOC_012223	Gins1	chr2:150735329-150757016	KO	WT	OK	5.3084	22.7018	2.09646	2.48899	0.0192	0.608695	no
XLOC_012249	XLOC_012249	Tpx2	chr2:152673699-152721057	KO	WT	OK	2.36561	16.8647	2.83372	4.19144	0.0009	0.159715	no
XLOC_012293	XLOC_012293	Cep250	chr2:155782293-155824636	KO	WT	OK	1.49472	5.49604	1.87852	2.77652	0.0079	0.415443	no
XLOC_012302	XLOC_012302	Myl9	chr2:156601199-156607393	KO	WT	OK	1.83796	11.875	2.69175	2.85357	0.01695	0.588526	no
XLOC_012323	XLOC_012323	Fam83d	chr2:158593834-158612373	KO	WT	OK	0.378969	5.17017	3.77006	3.77086	0.01115	0.485178	no
XLOC_012336	XLOC_012336	Mybl2	chr2:162880370-162910423	KO	WT	OK	1.15686	21.5261	4.2178	5.55786	0.00065	0.153455	no
XLOC_012367	XLOC_012367	Ube2c	chr2:164595428-164598402	KO	WT	OK	5.78619	55.5003	3.26181	4.21459	0.00195	0.217569	no
XLOC_012373	XLOC_012373	Mmp9	chr2:164773718-164781350	KO	WT	OK	2.37078	0.301046	-2.9773	-2.93566	0.01915	0.608695	no
XLOC_012386	XLOC_012386	Zfas1	chr2:166861295-166891362	KO	WT	OK	250.743	57.9311	-2.1138	-2.95128	0.00855	0.427917	no
XLOC_012438	XLOC_012438	Gm14403	chr2:177282930-177297016	KO	WT	OK	0.182711	1.2102	2.72761	2.4608	0.04195	0.894021	no
XLOC_012493	XLOC_012493	Mcm10	chr2:4911769-4933837	KO	WT	OK	1.37686	17.0361	3.62914	4.90526	0.00025	0.0956552	no
XLOC_012538	XLOC_012538	Mastl	chr2:22972063-23011544	KO	WT	OK	0.359807	3.60611	3.32515	3.50661	0.0066	0.385198	no
XLOC_012619	XLOC_012619	6530402F18Rik,Ntng2	chr2:29050245-29108513	KO	WT	OK	0.54802	2.5772	2.2335	2.3276	0.03055	0.792016	no
XLOC_012630	XLOC_012630	Dolk	chr2:30139748-30141874	KO	WT	OK	6.34512	19.341	1.60794	2.27741	0.02305	0.682034	no
XLOC_012675	XLOC_012675	Traf1	chr2:34797269-34817292	KO	WT	OK	5.68564	1.19623	-2.24883	-2.72959	0.0136	0.533235	no
XLOC_012744	XLOC_012744	Itgb6	chr2:60436348-60560660	KO	WT	OK	0.501106	1.8433	1.8791	2.0272	0.0437	0.902971	no
XLOC_013039	XLOC_013039	Prrg4	chr2:104670897-104690007	KO	WT	OK	19.2364	4.87509	-1.98034	-2.88738	0.00755	0.412684	no
XLOC_013086	XLOC_013086	Arhgap11a	chr2:113671649-113688818	KO	WT	OK	2.73207	13.7958	2.33616	3.52949	0.00195	0.217569	no
XLOC_013088	XLOC_013088	Actc1	chr2:113873019-113878611	KO	WT	OK	0	1.94457	inf	#NAME?	5e-05	0.0504364	no
XLOC_013173	XLOC_013173	Ncaph	chr2:126929545-126959690	KO	WT	OK	3.29655	17.0635	2.37188	3.33261	0.00435	0.321784	no
XLOC_013185	XLOC_013185	Bub1	chr2:127625935-127657595	KO	WT	OK	0.607398	8.66262	3.83409	4.57596	0.00045	0.121785	no
XLOC_013191	XLOC_013191	Ckap2l	chr2:129093945-129122948	KO	WT	OK	0.901705	8.86325	3.29711	3.99892	0.00115	0.1748	no
XLOC_013224	XLOC_013224	Pcna	chr2:132075021-132078916	KO	WT	OK	142.078	441.678	1.63631	3.67077	0.00045	0.121785	no
XLOC_013287	XLOC_013287	Sox12	chr2:152219347-152223782	KO	WT	OK	4.59395	12.2752	1.41794	2.2459	0.0348	0.829819	no
XLOC_013299	XLOC_013299	Dusp15	chr2:152766730-152777318	KO	WT	OK	1.42674	0	#NAME?	#NAME?	0.01625	0.588526	no
XLOC_013310	XLOC_013310	E2f1	chr2:154385135-154395628	KO	WT	OK	5.69293	30.104	2.40271	3.75426	0.00095	0.159715	no
XLOC_013342	XLOC_013342	Rbl1	chr2:156971629-157030270	KO	WT	OK	4.78275	16.8971	1.82086	2.75964	0.00835	0.427917	no
XLOC_013345	XLOC_013345	Blcap	chr2:157382097-157392097	KO	WT	OK	117.188	55.0108	-1.09104	-2.25254	0.02295	0.682034	no
XLOC_013356	XLOC_013356	Emilin3	chr2:160732173-160738075	KO	WT	OK	1.15278	0.143855	-3.00243	-2.62959	0.0287	0.761855	no
XLOC_013360	XLOC_013360	Jph2	chr2:163161977-163223729	KO	WT	OK	17.1689	51.5104	1.58507	3.25839	0.00235	0.234915	no
XLOC_013405	XLOC_013405	Sulf2	chr2:165899398-165981183	KO	WT	OK	22.606	7.9394	-1.5096	-2.62425	0.0121	0.506557	no
XLOC_013434	XLOC_013434	Aurka	chr2:172181689-172196070	KO	WT	OK	2.53521	17.4574	2.78366	3.5567	0.0057	0.364672	no
XLOC_013587	XLOC_013587	Bbs12	chr3:37211475-37220373	KO	WT	OK	2.25597	14.1487	2.64885	3.25173	0.00775	0.415443	no
XLOC_013597	XLOC_013597	Plk4	chr3:40603872-40620805	KO	WT	OK	2.57728	17.1702	2.73599	3.79398	0.00125	0.184933	no
XLOC_013665	XLOC_013665	Smc4	chr3:68808659-68838546	KO	WT	OK	11.8045	44.5659	1.9166	3.71014	0.00055	0.1387	no
XLOC_013680	XLOC_013680	4930579G24Rik	chr3:79433000-79436741	KO	WT	OK	4.12001	15.7236	1.93221	2.36105	0.0303	0.790525	no
XLOC_013716	XLOC_013716	Nes	chr3:87775014-87784373	KO	WT	OK	8.88735	67.0366	2.91512	5.98759	5e-05	0.0504364	no
XLOC_013718	XLOC_013718	Iqgap3	chr3:87885972-87924970	KO	WT	OK	0.261351	3.44719	3.72136	4.04315	0.00435	0.321784	no
XLOC_013766	XLOC_013766	S100a13	chr3:90318356-90328503	KO	WT	OK	42.9216	14.586	-1.55712	-1.97583	0.04985	0.959421	no
XLOC_013840	XLOC_013840	Anp32e	chr3:95733179-95751310	KO	WT	OK	48.3764	101.433	1.06815	2.3136	0.0207	0.639797	no
XLOC_013855	XLOC_013855	Txnip	chr3:96359690-96370724	KO	WT	OK	37.1587	11.0239	-1.75306	-2.99458	0.00385	0.30514	no
XLOC_013901	XLOC_013901	Ptpn22	chr3:103663717-103716175	KO	WT	OK	2.90998	0.557595	-2.38372	-2.41699	0.0205	0.635385	no
XLOC_013935	XLOC_013935	Psrc1	chr3:108186721-108191149	KO	WT	OK	28.4248	11.4345	-1.31375	-2.03062	0.0401	0.873538	no
XLOC_013975	XLOC_013975	Arsj	chr3:126066769-126143292	KO	WT	OK	1.10246	4.56741	2.05065	2.38375	0.02385	0.694592	no
XLOC_013984	XLOC_013984	Zgrf1	chr3:127256406-127320941	KO	WT	OK	0.809533	3.39727	2.06921	2.53859	0.02015	0.629815	no
XLOC_014006	XLOC_014006	Cenpe	chr3:134875526-134936504	KO	WT	OK	0.751119	5.04453	2.74761	3.52633	0.0047	0.338644	no
XLOC_014016	XLOC_014016	Ddit4l	chr3:137286635-137291296	KO	WT	OK	41.5334	13.4876	-1.62264	-2.81218	0.006	0.369867	no
XLOC_014017	XLOC_014017	H2az1	chr3:137527450-137529886	KO	WT	OK	118.392	290.626	1.29559	2.72472	0.00785	0.415443	no
XLOC_014022	XLOC_014022	Adh7	chr3:137873680-137902627	KO	WT	OK	0	1.03906	inf	#NAME?	0.00035	0.104962	no
XLOC_014083	XLOC_014083	Depdc1a	chr3:159158396-159192919	KO	WT	OK	0.20995	2.91481	3.79528	3.08061	0.0149	0.566122	no
XLOC_014128	XLOC_014128	Ect2	chr3:26996143-27052800	KO	WT	OK	1.72745	11.4657	2.73061	3.58215	0.0037	0.297501	no
XLOC_014138	XLOC_014138	Zmat3	chr3:32233715-32266360	KO	WT	OK	67.6431	28.7729	-1.23323	-2.76388	0.00525	0.353055	no
XLOC_014156	XLOC_014156	Ccna2	chr3:36451527-36471960	KO	WT	OK	2.35342	38.5252	4.03297	2.9468	0.04425	0.907575	no
XLOC_014238	XLOC_014238	Trim59	chr3:68839215-68848664	KO	WT	OK	5.23689	19.2447	1.87768	2.71597	0.01005	0.461192	no
XLOC_014333	XLOC_014333	Cks1b	chr3:89219393-89222213	KO	WT	OK	35.864	92.4766	1.36655	2.13884	0.0422	0.894021	no
XLOC_014356	XLOC_014356	Sprr1a	chr3:92287875-92289803	KO	WT	OK	1.79622	0	#NAME?	#NAME?	0.00135	0.187245	no
XLOC_014376	XLOC_014376	Crct1	chr3:92818126-92819608	KO	WT	OK	1.46127	0	#NAME?	#NAME?	0.00595	0.368834	no
XLOC_014442	XLOC_014442	Phgdh	chr3:98117093-98143892	KO	WT	OK	41.5306	100.011	1.26792	2.60117	0.01545	0.575075	no
XLOC_014582	XLOC_014582	Gar1	chr3:129527829-129534314	KO	WT	OK	47.1954	122.488	1.37592	2.56977	0.0138	0.539172	no
XLOC_014592	XLOC_014592	Npnt	chr3:132544708-132613255	KO	WT	OK	33.9353	69.9688	1.04393	2.29535	0.0244	0.701405	no
XLOC_014689	XLOC_014689	Trp53inp1	chr4:11083587-11101526	KO	WT	OK	29.7824	8.05244	-1.88696	-3.34996	0.00165	0.203427	no
XLOC_014692	XLOC_014692	Fsbp,Rad54b	chr4:11486066-11542955	KO	WT	OK	0.741258	5.42335	2.87114	3.10197	0.00915	0.439517	no
XLOC_014719	XLOC_014719	Mms22l	chr4:24423597-24530095	KO	WT	OK	2.114	11.7419	2.47362	3.3972	0.0042	0.3192	no
XLOC_014796	XLOC_014796	Melk	chr4:44313788-44377547	KO	WT	OK	0.886559	12.0022	3.75894	4.23863	0.0021	0.22192	no
XLOC_014830	XLOC_014830	Smc2	chr4:52452092-52501237	KO	WT	OK	7.55393	31.0328	2.03849	3.79378	0.0009	0.159715	no
XLOC_014968	XLOC_014968	Dhcr24	chr4:106233642-106261718	KO	WT	OK	28.3659	64.3375	1.1815	2.53175	0.0171	0.588526	no
XLOC_014981	XLOC_014981	Lrp8	chr4:107474863-107549445	KO	WT	OK	3.95616	11.8212	1.5792	2.6252	0.0126	0.506557	no
XLOC_014990	XLOC_014990	Orc1	chr4:108252058-108287436	KO	WT	OK	1.74398	5.79582	1.73263	2.09439	0.04635	0.934717	no
XLOC_015014	XLOC_015014	Stil	chr4:114672722-114715803	KO	WT	OK	0.625487	4.86199	2.9585	3.39606	0.0032	0.27525	no
XLOC_015118	XLOC_015118	Clspn	chr4:126234223-126271147	KO	WT	OK	1.1927	13.7761	3.52987	4.91137	0.0002	0.0821926	no
XLOC_015134	XLOC_015134	Rnf19b	chr4:128735387-128761770	KO	WT	OK	133.779	61.2278	-1.12759	-2.50346	0.0113	0.487879	no
XLOC_015171	XLOC_015171	Rpa2	chr4:132324274-132334661	KO	WT	OK	11.1203	52.1245	2.22877	3.58859	0.0018	0.212477	no
XLOC_015191	XLOC_015191	Stmn1	chr4:134024234-134029758	KO	WT	OK	6.37251	53.2261	3.0622	4.02448	0.00215	0.22506	no
XLOC_015453	XLOC_015453	Zfp292	chr4:34750358-34830197	KO	WT	OK	20.833	7.50208	-1.47351	-2.94761	0.00545	0.355725	no
XLOC_015476	XLOC_015476	Kif24	chr4:41337780-41411881	KO	WT	OK	0.219357	1.68226	2.93905	2.9904	0.01815	0.595474	no
XLOC_015507	XLOC_015507	Rmrp	chr4:43505656-43505931	KO	WT	OK	211.854	13.3568	-3.98743	-3.92195	0.00865	0.428484	no
XLOC_015509	XLOC_015509	Tpm2	chr4:43526597-43536426	KO	WT	OK	0.657887	2.80373	2.09144	2.22486	0.0332	0.824132	no
XLOC_015543	XLOC_015543	Tbc1d2	chr4:46617261-46663071	KO	WT	OK	4.67633	1.30295	-1.84359	-2.24251	0.0344	0.827988	no
XLOC_015583	XLOC_015583	Ptgr1	chr4:58978461-58999950	KO	WT	OK	18.487	49.9063	1.43271	2.53937	0.0132	0.523097	no
XLOC_015622	XLOC_015622	Tnc	chr4:63620818-63708049	KO	WT	OK	108.307	273.911	1.33859	3.08873	0.002	0.217569	no
XLOC_015743	XLOC_015743	Cdkn2c	chr4:109333480-109339361	KO	WT	OK	4.34754	18.9691	2.12538	2.52947	0.02505	0.709068	no
XLOC_015768	XLOC_015768	Nasp	chr4:116273656-116300556	KO	WT	OK	45.9068	105.001	1.19362	2.47549	0.01065	0.47269	no
XLOC_015780	XLOC_015780	Kif2c	chr4:116832237-116855229	KO	WT	OK	0.418508	8.30818	4.3112	4.75222	0.00165	0.203427	no
XLOC_015833	XLOC_015833	Rlf	chr4:120818487-120887689	KO	WT	OK	19.9189	9.33649	-1.09319	-2.08971	0.0394	0.870575	no
XLOC_015852	XLOC_015852	Cdca8	chr4:124595708-124614161	KO	WT	OK	3.17869	29.2926	3.20403	4.18186	0.0016	0.201745	no
XLOC_015915	XLOC_015915	Snhg3	chr4:131907847-131909601	KO	WT	OK	206.359	72.5761	-1.50759	-2.14698	0.03435	0.827988	no
XLOC_015931	XLOC_015931	Nudc	chr4:133088456-133101942	KO	WT	OK	72.735	246.625	1.7616	3.80302	0.0004	0.113805	no
XLOC_016003	XLOC_016003	Klhdc7a	chr4:139518087-139523941	KO	WT	OK	5.99075	1.91495	-1.64543	-2.38197	0.02195	0.660047	no
XLOC_016008	XLOC_016008	Padi3	chr4:140341283-140366563	KO	WT	OK	0.41495	2.68419	2.69348	2.72739	0.02575	0.722076	no
XLOC_016052	XLOC_016052	Tnfrsf1b	chr4:144802270-144836773	KO	WT	OK	6.64443	2.5002	-1.4101	-2.00056	0.04065	0.879062	no
XLOC_016078	XLOC_016078	Cenps	chr4:148502457-148511709	KO	WT	OK	3.6216	15.4426	2.09222	2.38002	0.02155	0.65155	no
XLOC_016159	XLOC_016159	Slc25a40	chr5:8422837-8454839	KO	WT	OK	1.20456	4.34213	1.8499	2.0232	0.04765	0.947535	no
XLOC_016172	XLOC_016172	Sema3a	chr5:13396783-13603485	KO	WT	OK	0.347154	1.93667	2.47993	2.71031	0.00985	0.457304	no
XLOC_016191	XLOC_016191	Lrrc17	chr5:20989664-21151423	KO	WT	OK	0.415524	2.5852	2.63727	2.42456	0.03055	0.792016	no
XLOC_016243	XLOC_016243	Cenpa	chr5:30969258-30977210	KO	WT	OK	2.1296	14.7846	2.79545	3.0787	0.0079	0.415443	no
XLOC_016248	XLOC_016248	Emilin1	chr5:31216158-31223646	KO	WT	OK	0.911509	3.13074	1.78018	2.03973	0.0482	0.950107	no
XLOC_016276	XLOC_016276	Tacc3	chr5:34000776-34014851	KO	WT	OK	4.48956	17.9358	1.9982	2.83729	0.01245	0.506557	no
XLOC_016331	XLOC_016331	Ncapg	chr5:46061163-46248779	KO	WT	OK	1.08681	13.015	3.582	2.66809	0.04605	0.93073	no
XLOC_016339	XLOC_016339	Sod3	chr5:52755042-52760977	KO	WT	OK	38.4474	10.569	-1.86305	-3.05239	0.00355	0.291784	no
XLOC_016350	XLOC_016350	Pcdh7	chr5:58109319-58524474	KO	WT	OK	4.12571	13.8307	1.74516	2.83826	0.00645	0.382723	no
XLOC_016371	XLOC_016371	Uchl1	chr5:67017733-67078473	KO	WT	OK	14.3889	49.2703	1.77576	2.58024	0.0183	0.595474	no
XLOC_016415	XLOC_016415	Ythdc1	chr5:87233290-87265684	KO	WT	OK	11.6731	32.7869	1.48993	2.64431	0.01035	0.464954	no
XLOC_016436	XLOC_016436	Dck	chr5:89194037-89212302	KO	WT	OK	5.37495	23.0401	2.09982	3.12481	0.00515	0.352743	no
XLOC_016503	XLOC_016503	Dmp1	chr5:104626593-104643121	KO	WT	OK	0.211041	2.05497	3.28352	3.02101	0.02345	0.69166	no
XLOC_016545	XLOC_016545	Pole	chr5:110715337-110766472	KO	WT	OK	2.96045	17.3695	2.55267	4.32128	5e-05	0.0504364	no
XLOC_016571	XLOC_016571	Ung	chr5:114580443-114589330	KO	WT	OK	9.05846	52.0895	2.52365	3.92382	0.001	0.165612	no
XLOC_016585	XLOC_016585	2210016L21Rik	chr5:115392210-115398549	KO	WT	OK	4.99227	21.4847	2.10554	2.64516	0.0179	0.595474	no
XLOC_016599	XLOC_016599	Cit	chr5:116295664-116456350	KO	WT	OK	1.75073	5.67613	1.69695	2.49971	0.01795	0.595474	no
XLOC_016657	XLOC_016657	Kntc1	chr5:124199734-124271602	KO	WT	OK	1.27965	10.2807	3.00611	4.30674	0.0008	0.159715	no
XLOC_016675	XLOC_016675	Rflna	chr5:125483817-125492917	KO	WT	OK	2.19002	0.245215	-3.15882	-2.65439	0.04695	0.940356	no
XLOC_016809	XLOC_016809	Pms2	chr5:144670869-144692625	KO	WT	OK	2.01845	9.4136	2.2215	2.74891	0.0171	0.588526	no
XLOC_016859	XLOC_016859	Brca2	chr5:151325195-151372721	KO	WT	OK	1.11137	4.85597	2.12742	3.10793	0.0045	0.330675	no
XLOC_016879	XLOC_016879	Dbf4	chr5:8396968-8422716	KO	WT	OK	4.53789	17.624	1.95745	2.81179	0.0082	0.425174	no
XLOC_016916	XLOC_016916	Atg9b	chr5:23870636-23897961	KO	WT	OK	6.86415	1.20959	-2.50457	-3.06873	0.0082	0.425174	no
XLOC_016943	XLOC_016943	Tyms	chr5:30384739-30400165	KO	WT	OK	4.38664	14.4876	1.72363	2.61128	0.00915	0.439517	no
XLOC_016962	XLOC_016962	Fndc4	chr5:31594614-31598305	KO	WT	OK	0.76213	3.79256	2.31506	2.38839	0.02475	0.705979	no
XLOC_017002	XLOC_017002	Evc	chr5:37690409-37728120	KO	WT	OK	0.765831	2.97038	1.95555	2.26545	0.0328	0.821555	no
XLOC_017198	XLOC_017198	Gbp9	chr5:105505484-105539311	KO	WT	OK	0.266985	1.27001	2.25001	2.25697	0.028	0.750454	no
XLOC_017247	XLOC_017247	Cryba4	chr5:112675511-112681538	KO	WT	OK	0	1.04151	inf	#NAME?	0.00495	0.348931	no
XLOC_017274	XLOC_017274	Gltp	chr5:115119510-115140944	KO	WT	OK	9.46603	32.8222	1.79384	2.68679	0.0141	0.547041	no
XLOC_017296	XLOC_017296	Hspb8	chr5:116858499-116872873	KO	WT	OK	2.27528	10.1169	2.15265	2.54986	0.0153	0.571612	no
XLOC_017300	XLOC_017300	Rfc5	chr5:117829153-117839032	KO	WT	OK	9.86081	29.23	1.56767	2.36726	0.0189	0.605963	no
XLOC_017448	XLOC_017448	Mcm7	chr5:138605810-138613111	KO	WT	OK	63.1805	143.764	1.18615	2.64434	0.0084	0.427917	no
XLOC_017462	XLOC_017462	3110082I17Rik	chr5:139835692-139936488	KO	WT	OK	29.8088	68.26	1.1953	2.05159	0.0425	0.894602	no
XLOC_017506	XLOC_017506	Pdap1	chr5:145889638-145900894	KO	WT	OK	58.8457	168.811	1.5204	3.29668	0.00135	0.187245	no
XLOC_017640	XLOC_017640	Cald1	chr6:34548503-34725469	KO	WT	OK	67.6067	145.43	1.10509	2.56308	0.00915	0.439517	no
XLOC_017734	XLOC_017734	Tmem176a	chr6:48791481-48795363	KO	WT	OK	38.7435	9.6325	-2.00797	-2.67448	0.0123	0.506557	no
XLOC_017780	XLOC_017780	Adcyap1r1	chr6:55401971-55451449	KO	WT	OK	5.30742	19.8597	1.90376	3.38193	0.00145	0.19621	no
XLOC_017818	XLOC_017818	Mad2l1	chr6:66485214-66491101	KO	WT	OK	7.48228	33.4274	2.15948	3.08412	0.0058	0.364672	no
XLOC_017985	XLOC_017985	Fancd2	chr6:113481675-113550709	KO	WT	OK	0.26461	5.07604	4.26176	4.4607	0.00135	0.187245	no
XLOC_018072	XLOC_018072	Cdca3	chr6:124780193-124783719	KO	WT	OK	0.812478	10.4298	3.68224	3.83098	0.00785	0.415443	no
XLOC_018101	XLOC_018101	Foxm1,Tex52	chr6:128313011-128335162	KO	WT	OK	2.97317	13.5584	2.18912	3.20151	0.0042	0.3192	no
XLOC_018208	XLOC_018208	Resf1	chr6:149257935-149284185	KO	WT	OK	23.4191	7.22823	-1.69597	-3.11545	0.0027	0.256062	no
XLOC_018223	XLOC_018223	Pdk4	chr6:5433350-5446278	KO	WT	OK	43.6297	17.31	-1.3337	-2.5156	0.01735	0.588526	no
XLOC_018300	XLOC_018300	Wdr91	chr6:34830425-34860831	KO	WT	OK	19.9687	7.77369	-1.36107	-2.15928	0.0308	0.794783	no
XLOC_018353	XLOC_018353	Ezh2	chr6:47480272-47545029	KO	WT	OK	16.8825	41.6164	1.30162	2.40589	0.01725	0.588526	no
XLOC_018374	XLOC_018374	Tmem176b	chr6:48783810-48791373	KO	WT	OK	105.387	31.0625	-1.76244	-2.91763	0.00695	0.397511	no
XLOC_018555	XLOC_018555	Mcm2	chr6:88833467-88848774	KO	WT	OK	43.0886	110.403	1.3574	2.99838	0.0052	0.353055	no
XLOC_018701	XLOC_018701	Tpi1	chr6:124758678-124764176	KO	WT	OK	83.0611	191.59	1.20578	2.57773	0.011	0.480535	no
XLOC_018708	XLOC_018708	Ptms	chr6:124863692-124875862	KO	WT	OK	37.0921	94.5845	1.35049	2.44984	0.0145	0.55672	no
XLOC_018712	XLOC_018712	Ncapd2	chr6:125118024-125141604	KO	WT	OK	6.88089	25.7213	1.9023	3.37786	0.0016	0.201745	no
XLOC_018727	XLOC_018727	Rad51ap1	chr6:126873434-126889605	KO	WT	OK	2.34456	20.1365	3.10242	3.84092	0.0025	0.245487	no
XLOC_018871	XLOC_018871	Myadm	chr7:3289038-3299350	KO	WT	OK	63.243	152.544	1.27025	2.79505	0.0053	0.35427	no
XLOC_018873	XLOC_018873	Cacng7	chr7:3332924-3367815	KO	WT	OK	1.04345	6.8819	2.72145	2.89221	0.01485	0.566122	no
XLOC_018879	XLOC_018879	Tsen34	chr7:3645211-3652637	KO	WT	OK	27.0411	70.4238	1.38091	2.43199	0.01635	0.588526	no
XLOC_018967	XLOC_018967	Lig1	chr7:13844315-13896776	KO	WT	OK	10.5373	50.03	2.24729	3.95372	0.0003	0.104962	no
XLOC_019102	XLOC_019102	Xrcc1	chr7:25331717-25358457	KO	WT	OK	7.69273	22.9207	1.57508	2.49729	0.0146	0.558626	no
XLOC_019145	XLOC_019145	Blvrb	chr7:28232996-28251000	KO	WT	OK	36.9548	86.8922	1.23347	2.08818	0.03725	0.856794	no
XLOC_019334	XLOC_019334	Tead2	chr7:52471122-52488989	KO	WT	OK	2.60772	16.677	2.677	3.34361	0.00545	0.355725	no
XLOC_019371	XLOC_019371	Tmem86a	chr7:54306009-54310146	KO	WT	OK	0.881591	5.2644	2.57809	2.60994	0.03025	0.790525	no
XLOC_019454	XLOC_019454	Prc1	chr7:87439336-87461145	KO	WT	OK	1.53533	25.3535	4.04556	5.1611	0.00035	0.104962	no
XLOC_019527	XLOC_019527	Gdpd5	chr7:106530027-106610384	KO	WT	OK	11.3894	3.31995	-1.77845	-2.74863	0.01195	0.504172	no
XLOC_019539	XLOC_019539	P4ha3	chr7:107434029-107468209	KO	WT	OK	0.419069	2.85022	2.76581	2.78801	0.0237	0.69204	no
XLOC_019560	XLOC_019560	Rrm1	chr7:109590208-109618285	KO	WT	OK	19.2547	80.1422	2.05735	4.26469	0.0002	0.0821926	no
XLOC_019679	XLOC_019679	Wee1	chr7:117265572-117286813	KO	WT	OK	7.40405	21.734	1.55357	2.47571	0.0188	0.604652	no
XLOC_019738	XLOC_019738	Plk1	chr7:129302948-129313398	KO	WT	OK	1.75817	19.236	3.45167	4.36301	0.0012	0.179935	no
XLOC_019765	XLOC_019765	Hirip3	chr7:133991066-134008636	KO	WT	OK	13.5296	41.5267	1.61792	2.0786	0.04945	0.958555	no
XLOC_019905	XLOC_019905	Tnnt3	chr7:149646716-149701914	KO	WT	OK	0.105935	1.1217	3.40443	0.423453	0.00745	0.409234	no
XLOC_019958	XLOC_019958	Il11	chr7:4723979-4734459	KO	WT	OK	5.93875	1.61517	-1.87847	-2.11293	0.0389	0.868334	no
XLOC_020271	XLOC_020271	Wdr62	chr7:31025156-31075256	KO	WT	OK	0.397995	2.78037	2.80445	3.13149	0.01	0.461192	no
XLOC_020345	XLOC_020345	Ccne1	chr7:38883002-38892509	KO	WT	OK	3.26241	18.7658	2.52409	3.21584	0.0066	0.385198	no
XLOC_020381	XLOC_020381	Pold1	chr7:51788113-51804185	KO	WT	OK	14.9754	50.7992	1.76221	3.41431	0.0018	0.212477	no
XLOC_020391	XLOC_020391	Cpt1c	chr7:52214741-52230221	KO	WT	OK	26.1668	10.1076	-1.3723	-2.31593	0.024	0.697131	no
XLOC_020432	XLOC_020432	Kcnj14	chr7:53071836-53080117	KO	WT	OK	4.74468	0.159543	-4.89429	-4.3559	0.03405	0.826143	no
XLOC_020469	XLOC_020469	E2f8	chr7:56121798-56141978	KO	WT	OK	0.657169	8.45744	3.68588	4.41947	0.0006	0.14473	no
XLOC_020563	XLOC_020563	Idh2	chr7:87239733-87260236	KO	WT	OK	12.3449	39.4479	1.67603	2.68254	0.01525	0.571612	no
XLOC_020663	XLOC_020663	Rnf169	chr7:107068764-107128968	KO	WT	OK	24.2997	10.4788	-1.21346	-2.42064	0.01725	0.588526	no
XLOC_020772	XLOC_020772	Cavin3	chr7:112629129-112630711	KO	WT	OK	4.65439	16.7918	1.8511	2.21643	0.03605	0.851087	no
XLOC_020851	XLOC_020851	Galnt18	chr7:118615169-118923491	KO	WT	OK	3.11192	10.7282	1.78553	2.37399	0.0237	0.69204	no
XLOC_020898	XLOC_020898	Palb2	chr7:129250775-129276460	KO	WT	OK	1.00264	3.69846	1.88311	2.01547	0.0433	0.90142	no
XLOC_020900	XLOC_020900	4930413G21Rik	chr7:130112571-130113973	KO	WT	OK	2.76827	11.0062	1.99126	2.27468	0.0314	0.797287	no
XLOC_020938	XLOC_020938	Kif22	chr7:134171244-134185934	KO	WT	OK	2.43733	16.2861	2.74027	3.51794	0.00415	0.3192	no
XLOC_020959	XLOC_020959	Bcl7c	chr7:134804967-134852280	KO	WT	OK	18.8033	55.4044	1.55901	2.20791	0.0332	0.824132	no
XLOC_020980	XLOC_020980	Fam24b	chr7:138469444-138473013	KO	WT	OK	1.06239	0	#NAME?	#NAME?	0.01295	0.516882	no
XLOC_020987	XLOC_020987	Fam53b	chr7:139903766-140004879	KO	WT	OK	15.4492	6.57224	-1.23307	-2.16268	0.03295	0.823453	no
XLOC_021000	XLOC_021000	Mki67	chr7:142881470-142908062	KO	WT	OK	1.41562	20.7627	3.87449	6.44933	5e-05	0.0504364	no
XLOC_021037	XLOC_021037	Ifitm3	chr7:148195488-148196643	KO	WT	OK	682.832	150.134	-2.18528	-4.43502	0.0001	0.0739733	no
XLOC_021073	XLOC_021073	H19,Mir675	chr7:149761434-149764051	KO	WT	OK	2.5251	38.5556	3.93253	4.26185	0.00035	0.104962	no
XLOC_021160	XLOC_021160	Cln8	chr8:14888535-14901719	KO	WT	OK	17.6403	7.36763	-1.2596	-2.32457	0.0242	0.698904	no
XLOC_021238	XLOC_021238	Adgra2	chr8:28196312-28233908	KO	WT	OK	2.64594	8.00922	1.59788	2.3451	0.02635	0.724246	no
XLOC_021262	XLOC_021262	Mfhas1	chr8:36645556-36742503	KO	WT	OK	0.865494	4.01755	2.21472	2.715	0.01635	0.588526	no
XLOC_021314	XLOC_021314	Hmgb2	chr8:59990639-59994796	KO	WT	OK	10.1094	67.7944	2.74547	4.52618	0.0002	0.0821926	no
XLOC_021337	XLOC_021337	Lpl	chr8:71404453-71430831	KO	WT	OK	2.2099	6.73674	1.60807	2.13214	0.03745	0.856794	no
XLOC_021358	XLOC_021358	Crlf1	chr8:73017029-73027980	KO	WT	OK	38.5995	93.4593	1.27576	2.50603	0.01325	0.52321	no
XLOC_021364	XLOC_021364	Lsm4	chr8:73197129-73202651	KO	WT	OK	50.9141	121.807	1.25846	2.22957	0.0286	0.761855	no
XLOC_021381	XLOC_021381	Ankle1	chr8:73929910-73934441	KO	WT	OK	0.132139	3.84632	4.86335	4.04651	0.04715	0.94266	no
XLOC_021414	XLOC_021414	Mcm5	chr8:77633407-77652338	KO	WT	OK	27.3194	116.076	2.08707	4.50312	5e-05	0.0504364	no
XLOC_021441	XLOC_021441	Adgrl1	chr8:86423996-86465853	KO	WT	OK	4.19278	9.42466	1.16853	2.06534	0.0388	0.868334	no
XLOC_021442	XLOC_021442	Asf1b	chr8:86479592-86494094	KO	WT	OK	2.57628	28.0654	3.44543	4.34218	0.0007	0.155344	no
XLOC_021499	XLOC_021499	Mmp2	chr8:95351195-95377320	KO	WT	OK	59.5957	23.8495	-1.32125	-2.68313	0.01045	0.465676	no
XLOC_021519	XLOC_021519	Cx3cl1	chr8:97296079-97306326	KO	WT	OK	17.4844	7.3533	-1.2496	-2.04919	0.04565	0.926019	no
XLOC_021532	XLOC_021532	Gins3	chr8:98157458-98168959	KO	WT	OK	2.53281	8.46515	1.7408	2.11522	0.04595	0.930404	no
XLOC_021552	XLOC_021552	Ces2g	chr8:107485617-107493437	KO	WT	OK	4.29714	0.73873	-2.54026	-2.67547	0.02155	0.65155	no
XLOC_021621	XLOC_021621	St3gal2	chr8:113443764-113496397	KO	WT	OK	37.9323	15.7383	-1.26914	-2.58261	0.015	0.566122	no
XLOC_021623	XLOC_021623	Exosc6	chr8:113580238-113581564	KO	WT	OK	29.1585	67.7863	1.21707	2.08286	0.03765	0.858972	no
XLOC_021634	XLOC_021634	Vat1l	chr8:116729539-116897970	KO	WT	OK	0.349712	2.21206	2.66115	2.73034	0.0126	0.506557	no
XLOC_021638	XLOC_021638	Cenpn	chr8:119445639-119465403	KO	WT	OK	2.07188	10.5046	2.342	2.74118	0.0114	0.490288	no
XLOC_021680	XLOC_021680	Cdt1	chr8:125091914-125097030	KO	WT	OK	39.4107	88.2798	1.16349	2.4122	0.0187	0.604652	no
XLOC_021727	XLOC_021727	Mir1903,Nrp1	chr8:130882972-131029375	KO	WT	OK	9.88206	22.1174	1.1623	2.0851	0.0345	0.828597	no
XLOC_021748	XLOC_021748	Shcbp1	chr8:4735975-4779567	KO	WT	OK	0.756478	11.6233	3.94157	4.22304	0.00315	0.27525	no
XLOC_021853	XLOC_021853	Nrg1	chr8:32925022-33119976	KO	WT	OK	2.77497	0.424369	-2.70908	-1.8555	0.01295	0.516882	no
XLOC_021904	XLOC_021904	Stox2	chr8:48265401-48437702	KO	WT	OK	8.08016	2.77844	-1.54011	-2.52539	0.0162	0.588526	no
XLOC_021910	XLOC_021910	Tenm3	chr8:49311018-49760044	KO	WT	OK	1.82056	5.77131	1.66452	2.63673	0.01045	0.465676	no
XLOC_021911	XLOC_021911	Neil3	chr8:54672220-54724419	KO	WT	OK	0.338431	4.02153	3.57081	3.404	0.0174	0.588526	no
XLOC_021965	XLOC_021965	Ssbp4	chr8:73121388-73132213	KO	WT	OK	2.60723	10.1558	1.96172	2.1908	0.0183	0.595474	no
XLOC_021981	XLOC_021981	Haus8	chr8:73774495-73796489	KO	WT	OK	3.59828	11.8491	1.7194	2.17586	0.04945	0.958555	no
XLOC_022098	XLOC_022098	Ccdc102a	chr8:97426768-97441998	KO	WT	OK	2.59185	8.63255	1.7358	2.15029	0.0434	0.90181	no
XLOC_022121	XLOC_022121	Rrad	chr8:107151969-107155189	KO	WT	OK	175.521	75.7279	-1.21275	-2.59535	0.0123	0.506557	no
XLOC_022184	XLOC_022184	Rfwd3	chr8:113794843-113824122	KO	WT	OK	16.2384	33.6578	1.05153	2.10509	0.04015	0.873538	no
XLOC_022224	XLOC_022224	1190005I06Rik,Emc8,Gm27021	chr8:123132499-123192042	KO	WT	OK	11.8118	27.5444	1.22153	2.0378	0.029	0.767981	no
XLOC_022263	XLOC_022263	Ccsap	chr8:126364743-126384109	KO	WT	OK	0.375845	2.24729	2.57998	2.44813	0.04115	0.884884	no
XLOC_022264	XLOC_022264	Acta1	chr8:126415657-126418675	KO	WT	OK	4.79524	26.278	2.45418	3.2684	0.0032	0.27525	no
XLOC_022404	XLOC_022404	Ncapd3	chr9:26837759-26902900	KO	WT	OK	4.78261	11.7521	1.29705	2.12697	0.04055	0.878795	no
XLOC_022545	XLOC_022545	Fxyd6	chr9:45178267-45204242	KO	WT	OK	10.8954	30.7674	1.49769	2.31791	0.02665	0.724775	no
XLOC_022650	XLOC_022650	Anp32a	chr9:62189149-62226609	KO	WT	OK	28.1146	59.5511	1.08281	2.06914	0.04195	0.894021	no
XLOC_022677	XLOC_022677	Pif1	chr9:65434966-65443774	KO	WT	OK	0.123098	1.8673	3.92308	3.06599	0.00945	0.446201	no
XLOC_022680	XLOC_022680	Pclaf	chr9:65676732-65756601	KO	WT	OK	3.13709	67.2913	4.42292	3.11419	0.04205	0.894021	no
XLOC_022681	XLOC_022681	Csnk1g1	chr9:65756816-65892821	KO	WT	OK	21.5998	9.08416	-1.2496	-2.46132	0.01795	0.595474	no
XLOC_022756	XLOC_022756	Ttk	chr9:83728295-83765997	KO	WT	OK	0.535137	8.18271	3.9346	4.35349	0.00095	0.159715	no
XLOC_022759	XLOC_022759	Tpbg	chr9:85735986-85740662	KO	WT	OK	2.90051	10.3846	1.84006	2.45991	0.0203	0.632721	no
XLOC_022823	XLOC_022823	Topbp1	chr9:103207656-103252757	KO	WT	OK	14.6208	44.8074	1.61572	3.31666	0.00205	0.218719	no
XLOC_022864	XLOC_022864	Traip	chr9:107853293-107874599	KO	WT	OK	1.51323	8.13057	2.42573	2.96142	0.0078	0.415443	no
XLOC_022931	XLOC_022931	Dclk3	chr9:111341584-111392115	KO	WT	OK	0.24228	1.27048	2.39062	2.28797	0.0495	0.958555	no
XLOC_022953	XLOC_022953	Ctdspl	chr9:118835653-118953237	KO	WT	OK	3.64226	9.52522	1.38692	2.07459	0.03865	0.868138	no
XLOC_022994	XLOC_022994	Kif15	chr9:122860198-122927851	KO	WT	OK	0.669154	7.67142	3.51908	4.35216	0.00085	0.159715	no
XLOC_022999	XLOC_022999	Lars2	chr9:123276044-123371793	KO	WT	OK	285.745	136.028	-1.07083	-2.53535	0.0101	0.461192	no
XLOC_023017	XLOC_023017	Birc3	chr9:7848700-7873170	KO	WT	OK	20.6024	5.70088	-1.85355	-2.76781	0.01165	0.497186	no
XLOC_023031	XLOC_023031	Fut4	chr9:14552902-14556566	KO	WT	OK	22.0669	8.36501	-1.39944	-2.37631	0.0201	0.629815	no
XLOC_023070	XLOC_023070	Dnmt1	chr9:20711649-20764332	KO	WT	OK	20.5541	73.2798	1.83399	3.97627	5e-05	0.0504364	no
XLOC_023089	XLOC_023089	Spc24	chr9:21559883-21564747	KO	WT	OK	4.10139	32.5563	2.98876	3.77982	0.002	0.217569	no
XLOC_023108	XLOC_023108	Anln	chr9:22135657-22193650	KO	WT	OK	1.93398	23.4796	3.60176	5.28062	0.0001	0.0739733	no
XLOC_023122	XLOC_023122	St14	chr9:30896174-30939384	KO	WT	OK	6.62966	1.82739	-1.85915	-2.43717	0.0197	0.620998	no
XLOC_023150	XLOC_023150	Chek1	chr9:36516066-36534243	KO	WT	OK	3.94822	14.5468	1.88143	2.65201	0.00965	0.449901	no
XLOC_023329	XLOC_023329	Cd276	chr9:58372106-58388747	KO	WT	OK	6.84886	23.4823	1.77764	2.92568	0.00585	0.364672	no
XLOC_023344	XLOC_023344	Kif23	chr9:61765084-61794606	KO	WT	OK	0.984632	10.3935	3.39996	4.21653	0.00095	0.159715	no
XLOC_023360	XLOC_023360	Zwilch	chr9:63964953-64020738	KO	WT	OK	2.23728	15.4723	2.78987	3.43164	0.0051	0.351488	no
XLOC_023393	XLOC_023393	Ccnb2	chr9:70255495-70269361	KO	WT	OK	1.16718	5.67853	2.28249	2.32943	0.0385	0.866523	no
XLOC_023438	XLOC_023438	Elovl4	chr9:83672298-83699912	KO	WT	OK	1.58595	5.56031	1.80982	2.10576	0.03965	0.870575	no
XLOC_023495	XLOC_023495	Il20rb	chr9:100358137-100386892	KO	WT	OK	6.62932	1.49926	-2.14461	-2.53206	0.01675	0.588526	no
XLOC_023660	XLOC_023660	Ulbp1	chrUn_random:3058602-3072666	KO	WT	OK	0.961277	7.33324	2.93143	2.98777	0.01905	0.60741	no
XLOC_023794	XLOC_023794	Dock11	chrX:33428826-33616557	KO	WT	OK	0.538457	2.19463	2.02707	2.33694	0.02665	0.724775	no
XLOC_023831	XLOC_023831	Gria3	chrX:38754030-39031778	KO	WT	OK	11.0527	3.70083	-1.57848	-2.43067	0.03035	0.790525	no
XLOC_023908	XLOC_023908	Hmgb3	chrX:68809091-68813848	KO	WT	OK	16.0548	41.0141	1.35312	2.14168	0.04325	0.90142	no
XLOC_023930	XLOC_023930	Dusp9	chrX:70884779-70888853	KO	WT	OK	4.26092	11.7852	1.46774	2.07458	0.03815	0.863774	no
XLOC_024010	XLOC_024010	Kif4	chrX:97821403-97922610	KO	WT	OK	0.636164	7.9802	3.64895	4.52416	0.0007	0.155344	no
XLOC_024091	XLOC_024091	Cenpi	chrX:130842622-130897643	KO	WT	OK	0.839513	6.73204	3.00342	3.48346	0.0047	0.338644	no
XLOC_024095	XLOC_024095	Armcx4	chrX:131221057-131232311	KO	WT	OK	0.308599	1.94047	2.6526	3.11795	0.00545	0.355725	no
XLOC_024226	XLOC_024226	Fancb	chrX:161418523-161435204	KO	WT	OK	1.83182	6.74971	1.88155	2.18915	0.03625	0.851931	no
XLOC_024529	XLOC_024529	Prrg1	chrX:75694948-75829236	KO	WT	OK	0.725253	4.49485	2.63172	2.89035	0.0061	0.371899	no
XLOC_024546	XLOC_024546	Pola1	chrX:90550104-90877494	KO	WT	OK	5.72265	18.3237	1.67896	2.91019	0.00585	0.364672	no
XLOC_024563	XLOC_024563	Eda2r	chrX:94529179-94572548	KO	WT	OK	48.4182	22.1749	-1.12662	-2.09434	0.03375	0.824868	no
XLOC_024579	XLOC_024579	Ercc6l	chrX:99338158-99352430	KO	WT	OK	1.8338	12.8014	2.8034	3.85697	0.00095	0.159715	no
XLOC_024600	XLOC_024600	Zdhhc15	chrX:101732308-101866403	KO	WT	OK	0.090192	1.46584	4.02258	3.42373	0.0263	0.724246	no
XLOC_024683	XLOC_024683	Acsl4	chrX:138752535-138825078	KO	WT	OK	12.3375	30.2109	1.29202	2.42772	0.01495	0.566122	no
XLOC_024750	XLOC_024750	Siah1b	chrX:160508634-160514425	KO	WT	OK	6.42183	19.3412	1.59062	2.16026	0.03905	0.868334	no

## Sheet: ASC24_down_GO
Supplementary Table S1. Transcriptomic changes upon YTHDC1 iKO in ASC.
GO analysis of down-regulated genes in ASC 24h upon YTHDC1 iKO.
	ONTOLOGY	ID	Description	GeneRatio	BgRatio	pvalue	p.adjust	qvalue	geneID	Count
GO:0007059	BP	GO:0007059	chromosome segregation	76/404	338/29008	2.33455e-69	7.47991e-66	6.11653e-66	Sgo2a/Kif14/Nsl1/Nek2/Nuf2/Cenpf/Fbxo5/Cenpw/Aurkb/Spag5/Cdc6/Birc5/Haspin/Brip1/Top2a/Brca1/Kif18b/Ncapg2/Gen1/Trip13/Cenph/Ccnb1/Dlgap5/Ska3/Esco2/Cdca2/Espl1/Dscc1/Recql4/Racgap1/Rmi2/Mis18a/Chtf18/Cenpq/Sgo1/Ndc80/Ska1/Cdca5/Incenp/Fen1/Bub1b/Knstrn/Knl1/Nusap1/Fam83d/Ube2c/Ncaph/Bub1/Smc4/Cenpe/Ect2/Smc2/Kif2c/Cdca8/Nudc/Cenps/Tacc3/Ncapg/Cit/Kntc1/Brca2/Mad2l1/Fancd2/Ncapd2/Prc1/Plk1/Ccne1/…	76
GO:0006260	BP	GO:0006260	DNA replication	64/404	253/29008	7.80545e-62	1.25043e-58	1.02251e-58	Mcm3/Prim2/Mcm6/Dtl/Fbxo5/Dna2/E2f7/Prim1/Timeless/Cdk1/Cdk2/Atad5/Cdc6/Rpa1/Rrm2/Gen1/Gmnn/Wdhd1/Esco2/Dscc1/Tonsl/Recql4/Rmi2/Polq/Chaf1b/Mcm4/Cdc45/Chaf1a/Chtf18/Fam111a/Pola2/Fen1/Rad51/Mcm8/Gins1/Mcm10/Pcna/Zgrf1/Ccna2/Mms22l/Orc1/Rpa2/Nasp/Cenps/Pole/Brca2/Dbf4/Rfc5/Mcm7/Mcm2/Lig1/Rrm1/Ccne1/Pold1/E2f8/Mcm5/Gins3/Cdt1/Rfwd3/Pif1/Pclaf/Topbp1/Traip/Pola1	64
GO:0098813	BP	GO:0098813	nuclear chromosome segregation	64/404	273/29008	1.61817e-59	1.7282e-56	1.4132e-56	Sgo2a/Kif14/Nsl1/Nek2/Nuf2/Cenpf/Fbxo5/Aurkb/Spag5/Cdc6/Birc5/Haspin/Brip1/Top2a/Kif18b/Ncapg2/Gen1/Trip13/Ccnb1/Esco2/Espl1/Dscc1/Recql4/Racgap1/Rmi2/Cenpq/Sgo1/Ndc80/Cdca5/Incenp/Fen1/Bub1b/Knstrn/Knl1/Nusap1/Fam83d/Ube2c/Ncaph/Bub1/Smc4/Cenpe/Ect2/Smc2/Kif2c/Cdca8/Nudc/Cenps/Tacc3/Ncapg/Cit/Kntc1/Brca2/Mad2l1/Fancd2/Ncapd2/Prc1/Plk1/Ccne1/Kif22/Cdt1/Ncapd3/Ttk/Kif23/Zwilch	64
GO:0000280	BP	GO:0000280	nuclear division	74/404	442/29008	1.57173e-57	1.25895e-54	1.02948e-54	Sgo2a/Kif14/Aspm/Nsl1/Nek2/Obsl1/Nuf2/Fbxo5/Aurkb/Spag5/Cdc6/Birc5/Fignl1/Haspin/Brip1/Top2a/Kif18b/Ncapg2/Gen1/Trip13/Ccnb1/Cdca2/Espl1/Dscc1/Racgap1/Chtf18/Kifc1/Sgo1/Ndc80/Cdca5/Kif20b/Kif11/Incenp/Bub1b/Knstrn/Rad51/Nusap1/Tpx2/Mybl2/Ube2c/Mastl/Ncaph/Bub1/Aurka/Smc4/Cenpe/Smc2/Kif2c/Cdca8/Nudc/Cenps/Tacc3/Ncapg/Cit/Kntc1/Brca2/Mad2l1/Fancd2/Ncapd2/Rad51ap1/Prc1/Plk1/Ccne1/Kif22/Mki67/Cdt1/Cc…	74
GO:0000819	BP	GO:0000819	sister chromatid segregation	54/404	188/29008	1.78085e-55	1.14117e-52	9.33167e-53	Sgo2a/Kif14/Nsl1/Nek2/Nuf2/Fbxo5/Aurkb/Spag5/Cdc6/Birc5/Haspin/Top2a/Kif18b/Ncapg2/Gen1/Trip13/Ccnb1/Esco2/Espl1/Dscc1/Recql4/Racgap1/Rmi2/Sgo1/Ndc80/Cdca5/Incenp/Fen1/Bub1b/Knstrn/Nusap1/Ube2c/Ncaph/Bub1/Smc4/Cenpe/Smc2/Kif2c/Cdca8/Nudc/Tacc3/Ncapg/Cit/Kntc1/Mad2l1/Ncapd2/Prc1/Plk1/Kif22/Cdt1/Ncapd3/Ttk/Kif23/Zwilch	54
GO:0048285	BP	GO:0048285	organelle fission	75/404	495/29008	5.09638e-55	2.72147e-52	2.22542e-52	Sgo2a/Kif14/Aspm/Nsl1/Nek2/Obsl1/Nuf2/Fbxo5/Mtfr2/Aurkb/Spag5/Cdc6/Birc5/Fignl1/Haspin/Brip1/Top2a/Kif18b/Ncapg2/Gen1/Trip13/Ccnb1/Cdca2/Espl1/Dscc1/Racgap1/Chtf18/Kifc1/Sgo1/Ndc80/Cdca5/Kif20b/Kif11/Incenp/Bub1b/Knstrn/Rad51/Nusap1/Tpx2/Mybl2/Ube2c/Mastl/Ncaph/Bub1/Aurka/Smc4/Cenpe/Smc2/Kif2c/Cdca8/Nudc/Cenps/Tacc3/Ncapg/Cit/Kntc1/Brca2/Mad2l1/Fancd2/Ncapd2/Rad51ap1/Prc1/Plk1/Ccne1/Kif22/Mki67/C…	75
GO:0140014	BP	GO:0140014	mitotic nuclear division	60/404	278/29008	1.8776e-53	8.59405e-51	7.02759e-51	Sgo2a/Kif14/Nsl1/Nek2/Obsl1/Nuf2/Fbxo5/Aurkb/Spag5/Cdc6/Birc5/Haspin/Kif18b/Ncapg2/Gen1/Trip13/Ccnb1/Cdca2/Espl1/Dscc1/Racgap1/Kifc1/Sgo1/Ndc80/Cdca5/Kif20b/Kif11/Incenp/Bub1b/Knstrn/Nusap1/Tpx2/Mybl2/Ube2c/Ncaph/Bub1/Aurka/Smc4/Cenpe/Smc2/Kif2c/Cdca8/Nudc/Tacc3/Ncapg/Cit/Kntc1/Mad2l1/Ncapd2/Prc1/Plk1/Kif22/Mki67/Cdt1/Ccsap/Ncapd3/Ttk/Chek1/Kif23/Zwilch	60
GO:0006261	BP	GO:0006261	DNA-dependent DNA replication	48/404	142/29008	2.91288e-53	1.16661e-50	9.53967e-51	Mcm3/Prim2/Mcm6/Fbxo5/Dna2/E2f7/Prim1/Timeless/Cdk2/Atad5/Cdc6/Rpa1/Gen1/Wdhd1/Dscc1/Tonsl/Recql4/Polq/Mcm4/Cdc45/Chtf18/Fam111a/Pola2/Rad51/Gins1/Mcm10/Pcna/Zgrf1/Mms22l/Orc1/Cenps/Pole/Brca2/Dbf4/Rfc5/Mcm7/Mcm2/Lig1/Ccne1/Pold1/E2f8/Mcm5/Gins3/Cdt1/Rfwd3/Topbp1/Traip/Pola1	48
GO:0000070	BP	GO:0000070	mitotic sister chromatid segregation	49/404	159/29008	4.51744e-52	1.60821e-49	1.31508e-49	Sgo2a/Kif14/Nsl1/Nek2/Nuf2/Fbxo5/Aurkb/Spag5/Cdc6/Birc5/Haspin/Kif18b/Ncapg2/Gen1/Trip13/Ccnb1/Espl1/Dscc1/Racgap1/Sgo1/Ndc80/Cdca5/Incenp/Bub1b/Knstrn/Nusap1/Ube2c/Ncaph/Bub1/Smc4/Cenpe/Smc2/Kif2c/Cdca8/Nudc/Tacc3/Ncapg/Cit/Kntc1/Mad2l1/Ncapd2/Prc1/Plk1/Kif22/Cdt1/Ncapd3/Ttk/Kif23/Zwilch	49
GO:0006281	BP	GO:0006281	DNA repair	66/404	495/29008	1.12763e-44	3.61292e-42	2.95439e-42	Ube2t/Exo1/Mcm3/Bard1/Mcm6/Dtl/Dna2/Timeless/Parpbp/Cdk2/Hrob/Fignl1/Rpa1/Brip1/Brca1/Gen1/Dek/Trip13/Wdhd1/Esco2/Tonsl/Recql4/Rmi2/Polq/Chaf1b/Mcm4/Cdc45/Chaf1a/Uhrf1/Msh2/Cdca5/Fam111a/Fen1/Rad51/Mcm8/Pcna/Smc4/Mms22l/Smc2/Clspn/Rpa2/Cenps/Pole/Ung/Pms2/Brca2/Rfc5/Mcm7/Fancd2/Mcm2/Rad51ap1/Lig1/Xrcc1/Pold1/Palb2/Kif22/Mcm5/Neil3/Rfwd3/Pif1/Pclaf/Topbp1/Traip/Chek1/Fancb/Pola1	66
GO:0044770	BP	GO:0044770	cell cycle phase transition	63/404	492/29008	1.52207e-41	4.43339e-39	3.62531e-39	Kif14/Cenpf/Dtl/Fbxo5/Dna2/E2f7/Timeless/Cdk1/Cdk2/Aurkb/Atad5/Cdc6/Birc5/Haspin/Brca1/Gen1/Trip13/Ccnb1/Skp2/Ccnd3/Msh2/Tcf19/Ndc80/Lmnb1/Cdca5/Bub1b/Wdr76/Fam83d/Ube2c/Mastl/Bub1/E2f1/Rbl1/Aurka/Nes/Iqgap3/Cenpe/Ccna2/Cks1b/Orc1/Stil/Clspn/Rpa2/Cdkn2c/Nasp/Tacc3/Pole/Cit/Kntc1/Dbf4/Mad2l1/Fancd2/Ezh2/Plk1/Ccne1/Cdt1/Rfwd3/Ttk/Topbp1/Ctdspl/Chek1/Zwilch/Ccnb2	63
GO:0044772	BP	GO:0044772	mitotic cell cycle phase transition	55/404	406/29008	1.37015e-37	3.65831e-35	2.9915e-35	Kif14/Cenpf/Dtl/Fbxo5/E2f7/Cdk1/Cdk2/Aurkb/Atad5/Cdc6/Birc5/Haspin/Brca1/Gen1/Trip13/Ccnb1/Skp2/Ccnd3/Tcf19/Ndc80/Lmnb1/Cdca5/Bub1b/Ube2c/Mastl/Bub1/E2f1/Rbl1/Nes/Iqgap3/Cenpe/Ccna2/Cks1b/Orc1/Clspn/Rpa2/Cdkn2c/Nasp/Tacc3/Pole/Cit/Kntc1/Dbf4/Mad2l1/Ezh2/Plk1/Ccne1/Cdt1/Rfwd3/Ttk/Topbp1/Ctdspl/Chek1/Zwilch/Ccnb2	55
GO:0006310	BP	GO:0006310	DNA recombination	47/404	301/29008	4.54007e-35	1.11895e-32	9.14999e-33	Exo1/Mcm3/Mcm6/Timeless/Parpbp/Atad5/Hrob/Fignl1/Rpa1/Brip1/Top2a/Brca1/Gen1/Trip13/Tonsl/Recql4/Rmi2/Polq/Mcm4/Cdc45/Msh2/Chtf18/Rad51/Mcm8/Mms22l/Rpa2/Cenps/Ung/Pms2/Brca2/Mcm7/Fancd2/Ezh2/Mcm2/Rad51ap1/Lig1/Xrcc1/Palb2/Hmgb2/Ankle1/Mcm5/Exosc6/Rfwd3/Pif1/Topbp1/Chek1/Fancb	47
GO:1901987	BP	GO:1901987	regulation of cell cycle phase transition	49/404	378/29008	1.29954e-32	2.97408e-30	2.43199e-30	Kif14/Cenpf/Dtl/Fbxo5/Dna2/E2f7/Timeless/Cdk1/Cdk2/Aurkb/Atad5/Cdc6/Birc5/Haspin/Brca1/Gen1/Trip13/Ccnb1/Ccnd3/Msh2/Ndc80/Lmnb1/Cdca5/Bub1b/Wdr76/Fam83d/Ube2c/Bub1/E2f1/Rbl1/Aurka/Cenpe/Orc1/Stil/Clspn/Rpa2/Kntc1/Dbf4/Mad2l1/Fancd2/Ezh2/Plk1/Cdt1/Rfwd3/Ttk/Topbp1/Ctdspl/Chek1/Zwilch	49
GO:0010948	BP	GO:0010948	negative regulation of cell cycle process	43/404	282/29008	1.07175e-31	2.28925e-29	1.87199e-29	Nek2/Dtl/Fbxo5/Dna2/E2f7/Timeless/Cdk1/Aurkb/Cdc6/Birc5/Haspin/Brca1/Gen1/Trip13/Ccnb1/Recql4/Msh2/Kifc1/Ndc80/Bub1b/Wdr76/Bub1/E2f1/Rbl1/Aurka/Cenpe/Orc1/Stil/Clspn/Rpa2/Kntc1/Mad2l1/Fancd2/Ezh2/Plk1/E2f8/Cdt1/Rfwd3/Ttk/Topbp1/Ctdspl/Chek1/Zwilch	43
GO:0007346	BP	GO:0007346	regulation of mitotic cell cycle	52/404	462/29008	1.66068e-31	3.32552e-29	2.71937e-29	Kif14/Obsl1/Cenpf/Dtl/Fbxo5/E2f7/Cdk1/Cdk2/Aurkb/Atad5/Cdc6/Birc5/Haspin/Brca1/Gen1/Trip13/Ccnb1/Dlgap5/Cdca2/Ccnd3/Msh2/Ndc80/Lmnb1/Cdca5/Kif20b/Bub1b/Nusap1/Ube2c/Bub1/E2f1/Rbl1/Cenpe/Cks1b/Orc1/Stil/Clspn/Rpa2/Kntc1/Brca2/Dbf4/Mad2l1/Fancd2/Ezh2/Plk1/Mki67/Cdt1/Rfwd3/Ttk/Topbp1/Ctdspl/Chek1/Zwilch	52
GO:1901988	BP	GO:1901988	negative regulation of cell cycle phase transition	39/404	242/29008	9.09349e-30	1.71386e-27	1.40147e-27	Dtl/Fbxo5/Dna2/E2f7/Timeless/Cdk1/Aurkb/Cdc6/Birc5/Haspin/Brca1/Gen1/Trip13/Ccnb1/Msh2/Ndc80/Bub1b/Wdr76/Bub1/E2f1/Rbl1/Aurka/Cenpe/Orc1/Stil/Clspn/Rpa2/Kntc1/Mad2l1/Fancd2/Ezh2/Plk1/Cdt1/Rfwd3/Ttk/Topbp1/Ctdspl/Chek1/Zwilch	39
GO:0045786	BP	GO:0045786	negative regulation of cell cycle	45/404	367/29008	6.01944e-29	1.07146e-26	8.76163e-27	Nek2/Dtl/Fbxo5/Dna2/E2f7/Timeless/Cdk1/Aurkb/Cdc6/Birc5/Haspin/Brca1/Gen1/Gmnn/Trip13/Ccnb1/Recql4/Msh2/Kifc1/Ndc80/Bub1b/Wdr76/Bub1/E2f1/Rbl1/Aurka/Cenpe/Orc1/Stil/Clspn/Rpa2/Cdkn2c/Kntc1/Mad2l1/Fancd2/Ezh2/Plk1/E2f8/Cdt1/Rfwd3/Ttk/Topbp1/Ctdspl/Chek1/Zwilch	45
GO:1901990	BP	GO:1901990	regulation of mitotic cell cycle phase transition	41/404	293/29008	9.72949e-29	1.6407e-26	1.34165e-26	Kif14/Cenpf/Dtl/Fbxo5/E2f7/Cdk1/Cdk2/Aurkb/Atad5/Cdc6/Birc5/Haspin/Brca1/Gen1/Trip13/Ccnb1/Ccnd3/Ndc80/Lmnb1/Cdca5/Bub1b/Ube2c/Bub1/E2f1/Rbl1/Cenpe/Orc1/Clspn/Rpa2/Kntc1/Dbf4/Mad2l1/Ezh2/Plk1/Cdt1/Rfwd3/Ttk/Topbp1/Ctdspl/Chek1/Zwilch	41
GO:0006302	BP	GO:0006302	double-strand break repair	38/404	244/29008	1.85179e-28	2.96656e-26	2.42584e-26	Mcm3/Mcm6/Dna2/Timeless/Parpbp/Fignl1/Rpa1/Brip1/Brca1/Gen1/Dek/Trip13/Esco2/Tonsl/Recql4/Rmi2/Polq/Mcm4/Cdc45/Msh2/Cdca5/Rad51/Mcm8/Mms22l/Rpa2/Brca2/Mcm7/Fancd2/Mcm2/Rad51ap1/Lig1/Xrcc1/Palb2/Mcm5/Rfwd3/Chek1/Fancb/Pola1	38
GO:0007051	BP	GO:0007051	spindle organization	34/404	183/29008	3.17955e-28	4.85108e-26	3.96687e-26	Aspm/Nek2/Nuf2/Fbxo5/Aurkb/Spag5/Cenph/Ccnb1/Dlgap5/Haus4/Espl1/Racgap1/Kifc1/Tubb5/Ndc80/Kif11/Incenp/Knstrn/Tpx2/Mybl2/Aurka/Cenpe/Stil/Stmn1/Nudc/Tacc3/Prc1/Plk1/Wdr62/Haus8/Ccsap/Kif23/Ccnb2/Kif4	34
GO:0000075	BP	GO:0000075	cell cycle checkpoint signaling	33/404	175/29008	1.20549e-27	1.75562e-25	1.43562e-25	Dtl/Dna2/Timeless/Cdk1/Aurkb/Cdc6/Birc5/Brca1/Gen1/Trip13/Ccnb1/Msh2/Ndc80/Bub1b/Wdr76/Bub1/E2f1/Aurka/Cenpe/Orc1/Stil/Clspn/Rpa2/Kntc1/Mad2l1/Fancd2/Plk1/Cdt1/Rfwd3/Ttk/Topbp1/Chek1/Zwilch	33
GO:0051983	BP	GO:0051983	regulation of chromosome segregation	25/404	86/29008	2.65863e-26	3.70359e-24	3.02853e-24	Fbxo5/Aurkb/Cdc6/Birc5/Gen1/Trip13/Ccnb1/Cdca2/Rmi2/Chtf18/Ndc80/Bub1b/Ube2c/Bub1/Cenpe/Kif2c/Tacc3/Cit/Kntc1/Mad2l1/Plk1/Mki67/Cdt1/Ttk/Zwilch	25
GO:0000725	BP	GO:0000725	recombinational repair	29/404	137/29008	5.90836e-26	7.88766e-24	6.44996e-24	Mcm3/Mcm6/Timeless/Parpbp/Hrob/Fignl1/Rpa1/Brca1/Gen1/Tonsl/Recql4/Rmi2/Polq/Mcm4/Cdc45/Rad51/Mcm8/Mms22l/Rpa2/Brca2/Mcm7/Mcm2/Rad51ap1/Xrcc1/Palb2/Mcm5/Rfwd3/Chek1/Fancb	29
GO:0090068	BP	GO:0090068	positive regulation of cell cycle process	36/404	249/29008	7.49466e-26	9.60515e-24	7.8544e-24	Sgo2a/Kif14/Dtl/Fbxo5/E2f7/Cdk1/Aurkb/Spag5/Atad5/Cdc6/Birc5/Gen1/Ccnb1/Racgap1/Ccnd3/Ndc80/Lmnb1/Cdca5/Kif20b/Fen1/Nusap1/Fam83d/Ube2c/Aurka/Plk4/Cenpe/Ect2/Orc1/Cit/Dbf4/Mad2l1/Ezh2/Rad51ap1/E2f8/Cdt1/Kif23	36
GO:0044786	BP	GO:0044786	cell cycle DNA replication	19/404	38/29008	9.83633e-26	1.21214e-23	9.912e-24	Mcm3/Mcm6/Fbxo5/Dna2/E2f7/Atad5/Mcm4/Cdc45/Rad51/Gins1/Pcna/Brca2/Dbf4/Mcm2/Lig1/E2f8/Gins3/Cdt1/Pola1	19
GO:1901991	BP	GO:1901991	negative regulation of mitotic cell cycle phase transition	31/404	169/29008	1.19125e-25	1.41361e-23	1.15595e-23	Dtl/Fbxo5/E2f7/Cdk1/Aurkb/Cdc6/Birc5/Haspin/Brca1/Gen1/Trip13/Ccnb1/Ndc80/Bub1b/Bub1/Rbl1/Cenpe/Orc1/Clspn/Rpa2/Kntc1/Mad2l1/Ezh2/Plk1/Cdt1/Rfwd3/Ttk/Topbp1/Ctdspl/Chek1/Zwilch	31
GO:0033044	BP	GO:0033044	regulation of chromosome organization	32/404	185/29008	1.32514e-25	1.51633e-23	1.23995e-23	Sgo2a/Nek2/Fbxo5/Aurkb/Cdc6/Birc5/Top2a/Gen1/Trip13/Ccnb1/Wdhd1/Recql4/Rmi2/Ndc80/Cdca5/Fen1/Bub1b/Ube2c/Bub1/Cenpe/Tacc3/Cit/Kntc1/Mad2l1/Mcm2/Xrcc1/Plk1/Cdt1/Pif1/Ttk/Dnmt1/Zwilch	32
GO:0051321	BP	GO:0051321	meiotic cell cycle	40/404	333/29008	1.77617e-25	1.94522e-23	1.59066e-23	Sgo2a/Aspm/Exo1/Nek2/Nuf2/Fbxo5/Cdk2/Fignl1/Rpa1/Brip1/Top2a/Trip13/Espl1/Pkmyt1/Chtf18/Sgo1/Ndc80/Incenp/Bub1b/Rad51/Mastl/Ncaph/Bub1/Aurka/Smc4/Cenpe/Smc2/Cenps/Pms2/Brca2/Fancd2/Ncapd2/Rad51ap1/Plk1/Ccne1/Mki67/Ncapd3/Ttk/Topbp1/Ccnb2	40
GO:0071103	BP	GO:0071103	DNA conformation change	33/404	203/29008	1.82136e-25	1.94522e-23	1.59066e-23	Mcm3/Mcm6/Cdk1/Rpa1/Top2a/Ncapg2/H2bc14/H2bc12/Ccnb1/Recql4/Chaf1b/Mcm4/Mis18a/Chaf1a/Cdca5/Hells/Incenp/Hat1/Rad51/Nusap1/Mcm8/Ncaph/Smc4/Smc2/Nasp/Ncapg/Mcm7/Mcm2/Ncapd2/Mcm5/Asf1b/Ncapd3/Pif1	33
GO:0051304	BP	GO:0051304	chromosome separation	25/404	96/29008	5.72224e-25	5.91421e-23	4.83621e-23	Fbxo5/Aurkb/Cdc6/Birc5/Top2a/Gen1/Trip13/Ccnb1/Espl1/Ndc80/Bub1b/Ube2c/Ncaph/Bub1/Cenpe/Cenps/Tacc3/Cit/Kntc1/Mad2l1/Plk1/Cdt1/Ncapd3/Ttk/Zwilch	25
GO:0000724	BP	GO:0000724	double-strand break repair via homologous recombination	28/404	135/29008	7.73755e-25	7.74722e-23	6.33512e-23	Mcm3/Mcm6/Timeless/Parpbp/Fignl1/Rpa1/Brca1/Gen1/Tonsl/Recql4/Rmi2/Polq/Mcm4/Cdc45/Rad51/Mcm8/Mms22l/Rpa2/Brca2/Mcm7/Mcm2/Rad51ap1/Xrcc1/Palb2/Mcm5/Rfwd3/Chek1/Fancb	28
GO:0007093	BP	GO:0007093	mitotic cell cycle checkpoint signaling	28/404	136/29008	9.62129e-25	9.24743e-23	7.56188e-23	Dtl/Cdk1/Aurkb/Cdc6/Birc5/Brca1/Gen1/Trip13/Ccnb1/Msh2/Ndc80/Bub1b/Bub1/Cenpe/Orc1/Stil/Clspn/Rpa2/Kntc1/Mad2l1/Fancd2/Plk1/Cdt1/Rfwd3/Ttk/Topbp1/Chek1/Zwilch	28
GO:0045930	BP	GO:0045930	negative regulation of mitotic cell cycle	34/404	231/29008	9.81313e-25	9.24743e-23	7.56188e-23	Dtl/Fbxo5/E2f7/Cdk1/Aurkb/Cdc6/Birc5/Haspin/Brca1/Gen1/Trip13/Ccnb1/Msh2/Ndc80/Bub1b/Bub1/Rbl1/Cenpe/Orc1/Stil/Clspn/Rpa2/Kntc1/Mad2l1/Fancd2/Ezh2/Plk1/Cdt1/Rfwd3/Ttk/Topbp1/Ctdspl/Chek1/Zwilch	34
GO:0140013	BP	GO:0140013	meiotic nuclear division	32/404	200/29008	1.66748e-24	1.52645e-22	1.24822e-22	Sgo2a/Aspm/Nuf2/Fbxo5/Fignl1/Brip1/Top2a/Trip13/Espl1/Chtf18/Sgo1/Ndc80/Incenp/Bub1b/Rad51/Mastl/Ncaph/Bub1/Aurka/Smc4/Cenpe/Smc2/Cenps/Brca2/Fancd2/Rad51ap1/Plk1/Ccne1/Ncapd3/Ttk/Topbp1/Ccnb2	32
GO:1903046	BP	GO:1903046	meiotic cell cycle process	33/404	220/29008	2.61643e-24	2.2738e-22	1.85935e-22	Sgo2a/Aspm/Nuf2/Fbxo5/Fignl1/Brip1/Top2a/Trip13/Espl1/Chtf18/Sgo1/Ndc80/Incenp/Bub1b/Rad51/Mastl/Ncaph/Bub1/Aurka/Smc4/Cenpe/Smc2/Cenps/Brca2/Fancd2/Ncapd2/Rad51ap1/Plk1/Ccne1/Ncapd3/Ttk/Topbp1/Ccnb2	33
GO:0045787	BP	GO:0045787	positive regulation of cell cycle	39/404	336/29008	2.6258e-24	2.2738e-22	1.85935e-22	Sgo2a/Kif14/Dtl/Fbxo5/E2f7/Cdk1/Aurkb/Spag5/Atad5/Cdc6/Birc5/Gen1/Ccnb1/Racgap1/Ccnd3/Ndc80/Lmnb1/Cdca5/Kif20b/Fen1/Nusap1/Fam83d/Ube2c/Aurka/Plk4/Cenpe/Ect2/Orc1/Stil/Cit/Brca2/Dbf4/Mad2l1/Ezh2/Rad51ap1/E2f8/Cdt1/Chek1/Kif23	39
GO:0006270	BP	GO:0006270	DNA replication initiation	17/404	31/29008	4.4248e-24	3.73081e-22	3.05079e-22	Mcm3/Mcm6/Cdk2/Cdc6/Mcm4/Cdc45/Pola2/Mcm10/Orc1/Mcm7/Mcm2/Ccne1/Mcm5/Gins3/Cdt1/Topbp1/Pola1	17
GO:1902850	BP	GO:1902850	microtubule cytoskeleton organization involved in mitosis	28/404	146/29008	7.69979e-24	6.32567e-22	5.17268e-22	Nek2/Nuf2/Aurkb/Cenph/Ccnb1/Dlgap5/Racgap1/Kifc1/Ndc80/Kif11/Sapcd2/Nusap1/Tpx2/Mybl2/Aurka/Cenpe/Stil/Stmn1/Nudc/Cenpa/Tacc3/Mad2l1/Prc1/Plk1/Wdr62/Ccsap/Kif23/Kif4	28
GO:0140694	BP	GO:0140694	non-membrane-bounded organelle assembly	40/404	373/29008	1.32455e-23	1.06097e-21	8.67581e-22	Csrp1/Tnnt2/Aspm/Nek2/Fbxo5/Cenpw/Cdk2/Myh10/Aurkb/Spag5/Cenph/Dlgap5/Haus4/Racgap1/Kifc1/Tubb5/Ndc80/Kif11/Incenp/Tpx2/Mybl2/Actc1/Aurka/Plk4/Cenpe/Stil/Cenps/Cenpa/Kntc1/Prc1/Plk1/Tnnt3/Wdr62/Lsm4/Cenpn/Haus8/Ccsap/Acta1/Kif23/Ccnb2	40
GO:0033045	BP	GO:0033045	regulation of sister chromatid segregation	21/404	69/29008	9.14203e-23	7.14416e-21	5.84198e-21	Fbxo5/Aurkb/Cdc6/Birc5/Gen1/Trip13/Ccnb1/Rmi2/Ndc80/Bub1b/Ube2c/Bub1/Cenpe/Tacc3/Cit/Kntc1/Mad2l1/Plk1/Cdt1/Ttk/Zwilch	21
GO:0007091	BP	GO:0007091	metaphase/anaphase transition of mitotic cell cycle	20/404	61/29008	1.74327e-22	1.32987e-20	1.08747e-20	Fbxo5/Aurkb/Cdc6/Birc5/Gen1/Trip13/Ccnb1/Ndc80/Bub1b/Ube2c/Bub1/Cenpe/Tacc3/Cit/Kntc1/Mad2l1/Plk1/Cdt1/Ttk/Zwilch	20
GO:0010965	BP	GO:0010965	regulation of mitotic sister chromatid separation	20/404	62/29008	2.54093e-22	1.89329e-20	1.5482e-20	Fbxo5/Aurkb/Cdc6/Birc5/Gen1/Trip13/Ccnb1/Ndc80/Bub1b/Ube2c/Bub1/Cenpe/Tacc3/Cit/Kntc1/Mad2l1/Plk1/Cdt1/Ttk/Zwilch	20
GO:0044784	BP	GO:0044784	metaphase/anaphase transition of cell cycle	20/404	64/29008	5.27914e-22	3.84418e-20	3.14349e-20	Fbxo5/Aurkb/Cdc6/Birc5/Gen1/Trip13/Ccnb1/Ndc80/Bub1b/Ube2c/Bub1/Cenpe/Tacc3/Cit/Kntc1/Mad2l1/Plk1/Cdt1/Ttk/Zwilch	20
GO:0051306	BP	GO:0051306	mitotic sister chromatid separation	20/404	65/29008	7.52921e-22	5.3608e-20	4.38367e-20	Fbxo5/Aurkb/Cdc6/Birc5/Gen1/Trip13/Ccnb1/Ndc80/Bub1b/Ube2c/Bub1/Cenpe/Tacc3/Cit/Kntc1/Mad2l1/Plk1/Cdt1/Ttk/Zwilch	20
GO:0033260	BP	GO:0033260	nuclear DNA replication	16/404	33/29008	1.40073e-21	9.7564e-20	7.97808e-20	Mcm3/Mcm6/Dna2/Atad5/Mcm4/Cdc45/Rad51/Gins1/Pcna/Brca2/Dbf4/Mcm2/Lig1/Gins3/Cdt1/Pola1	16
GO:1905818	BP	GO:1905818	regulation of chromosome separation	20/404	68/29008	2.10008e-21	1.43163e-19	1.17068e-19	Fbxo5/Aurkb/Cdc6/Birc5/Gen1/Trip13/Ccnb1/Ndc80/Bub1b/Ube2c/Bub1/Cenpe/Tacc3/Cit/Kntc1/Mad2l1/Plk1/Cdt1/Ttk/Zwilch	20
GO:0007052	BP	GO:0007052	mitotic spindle organization	24/404	119/29008	3.72192e-21	2.48438e-19	2.03155e-19	Nek2/Nuf2/Aurkb/Cenph/Ccnb1/Dlgap5/Racgap1/Kifc1/Ndc80/Kif11/Tpx2/Mybl2/Aurka/Cenpe/Stil/Stmn1/Nudc/Tacc3/Prc1/Plk1/Wdr62/Ccsap/Kif23/Kif4	24
GO:0031577	BP	GO:0031577	spindle checkpoint signaling	17/404	45/29008	1.54107e-20	1.006e-18	8.22637e-19	Aurkb/Birc5/Gen1/Trip13/Ccnb1/Ndc80/Bub1b/Bub1/Aurka/Cenpe/Stil/Kntc1/Mad2l1/Plk1/Cdt1/Ttk/Zwilch	17
GO:2001251	BP	GO:2001251	negative regulation of chromosome organization	21/404	86/29008	1.56992e-20	1.006e-18	8.22637e-19	Fbxo5/Aurkb/Birc5/Top2a/Gen1/Trip13/Ccnb1/Recql4/Ndc80/Bub1b/Bub1/Cenpe/Kntc1/Mad2l1/Mcm2/Xrcc1/Plk1/Cdt1/Pif1/Ttk/Zwilch	21
GO:0051985	BP	GO:0051985	negative regulation of chromosome segregation	17/404	46/29008	2.41364e-20	1.51634e-18	1.23995e-18	Fbxo5/Aurkb/Birc5/Gen1/Trip13/Ccnb1/Chtf18/Ndc80/Bub1b/Bub1/Cenpe/Kntc1/Mad2l1/Plk1/Cdt1/Ttk/Zwilch	17
GO:0030071	BP	GO:0030071	regulation of mitotic metaphase/anaphase transition	18/404	58/29008	7.20462e-20	4.43915e-18	3.63002e-18	Fbxo5/Aurkb/Cdc6/Birc5/Gen1/Trip13/Ccnb1/Ndc80/Bub1b/Ube2c/Bub1/Cenpe/Kntc1/Mad2l1/Plk1/Cdt1/Ttk/Zwilch	18
GO:0008608	BP	GO:0008608	attachment of spindle microtubules to kinetochore	15/404	33/29008	9.16609e-20	5.54116e-18	4.53116e-18	Nek2/Nuf2/Aurkb/Spag5/Ccnb1/Racgap1/Sgo1/Ndc80/Knstrn/Knl1/Cenpe/Ect2/Kif2c/Brca2/Cdt1	15
GO:0045841	BP	GO:0045841	negative regulation of mitotic metaphase/anaphase transition	16/404	42/29008	1.78347e-19	1.03895e-17	8.49579e-18	Fbxo5/Aurkb/Birc5/Gen1/Trip13/Ccnb1/Ndc80/Bub1b/Bub1/Cenpe/Kntc1/Mad2l1/Plk1/Cdt1/Ttk/Zwilch	16
GO:0071174	BP	GO:0071174	mitotic spindle checkpoint signaling	16/404	42/29008	1.78347e-19	1.03895e-17	8.49579e-18	Aurkb/Birc5/Gen1/Trip13/Ccnb1/Ndc80/Bub1b/Bub1/Cenpe/Stil/Kntc1/Mad2l1/Plk1/Cdt1/Ttk/Zwilch	16
GO:0034502	BP	GO:0034502	protein localization to chromosome	21/404	96/29008	1.88157e-19	1.07653e-17	8.80307e-18	Cdk1/Aurkb/Haspin/Rpa1/Esco2/Msh2/Cenpq/Ndc80/Cdca5/Bub1b/Knl1/Mcm8/Rpa2/Cenpa/Kntc1/Brca2/Ezh2/Plk1/Cdt1/Ttk/Zwilch	21
GO:1902099	BP	GO:1902099	regulation of metaphase/anaphase transition of cell cycle	18/404	61/29008	2.02258e-19	1.13428e-17	9.27535e-18	Fbxo5/Aurkb/Cdc6/Birc5/Gen1/Trip13/Ccnb1/Ndc80/Bub1b/Ube2c/Bub1/Cenpe/Kntc1/Mad2l1/Plk1/Cdt1/Ttk/Zwilch	18
GO:0007088	BP	GO:0007088	regulation of mitotic nuclear division	22/404	110/29008	2.05332e-19	1.13428e-17	9.27535e-18	Obsl1/Fbxo5/Aurkb/Birc5/Gen1/Trip13/Ccnb1/Cdca2/Ndc80/Kif20b/Bub1b/Nusap1/Bub1/Cenpe/Kntc1/Mad2l1/Plk1/Mki67/Cdt1/Ttk/Chek1/Zwilch	22
GO:0051383	BP	GO:0051383	kinetochore organization	13/404	22/29008	2.71734e-19	1.42678e-17	1.16672e-17	Nuf2/Cenpw/Cenph/Dlgap5/Ndc80/Smc4/Cenpe/Smc2/Cenps/Cenpa/Kntc1/Cenpn/Cdt1	13
GO:0033046	BP	GO:0033046	negative regulation of sister chromatid segregation	16/404	43/29008	2.80457e-19	1.42678e-17	1.16672e-17	Fbxo5/Aurkb/Birc5/Gen1/Trip13/Ccnb1/Ndc80/Bub1b/Bub1/Cenpe/Kntc1/Mad2l1/Plk1/Cdt1/Ttk/Zwilch	16
GO:0033048	BP	GO:0033048	negative regulation of mitotic sister chromatid segregation	16/404	43/29008	2.80457e-19	1.42678e-17	1.16672e-17	Fbxo5/Aurkb/Birc5/Gen1/Trip13/Ccnb1/Ndc80/Bub1b/Bub1/Cenpe/Kntc1/Mad2l1/Plk1/Cdt1/Ttk/Zwilch	16
GO:2000816	BP	GO:2000816	negative regulation of mitotic sister chromatid separation	16/404	43/29008	2.80457e-19	1.42678e-17	1.16672e-17	Fbxo5/Aurkb/Birc5/Gen1/Trip13/Ccnb1/Ndc80/Bub1b/Bub1/Cenpe/Kntc1/Mad2l1/Plk1/Cdt1/Ttk/Zwilch	16
GO:0045839	BP	GO:0045839	negative regulation of mitotic nuclear division	17/404	52/29008	2.80547e-19	1.42678e-17	1.16672e-17	Fbxo5/Aurkb/Birc5/Gen1/Trip13/Ccnb1/Ndc80/Bub1b/Bub1/Cenpe/Kntc1/Mad2l1/Plk1/Cdt1/Ttk/Chek1/Zwilch	17
GO:1902100	BP	GO:1902100	negative regulation of metaphase/anaphase transition of cell cycle	16/404	44/29008	4.35169e-19	2.17856e-17	1.78147e-17	Fbxo5/Aurkb/Birc5/Gen1/Trip13/Ccnb1/Ndc80/Bub1b/Bub1/Cenpe/Kntc1/Mad2l1/Plk1/Cdt1/Ttk/Zwilch	16
GO:0051310	BP	GO:0051310	metaphase plate congression	18/404	64/29008	5.3439e-19	2.63413e-17	2.154e-17	Kif14/Nuf2/Cenpf/Aurkb/Spag5/Ccnb1/Cenpq/Ndc80/Cdca5/Incenp/Fam83d/Cenpe/Kif2c/Cdca8/Nudc/Brca2/Kif22/Cdt1	18
GO:0051225	BP	GO:0051225	spindle assembly	22/404	115/29008	5.69073e-19	2.76259e-17	2.25905e-17	Aspm/Nek2/Fbxo5/Aurkb/Spag5/Haus4/Racgap1/Kifc1/Tubb5/Ndc80/Kif11/Incenp/Tpx2/Mybl2/Aurka/Cenpe/Prc1/Plk1/Haus8/Ccsap/Kif23/Ccnb2	22
GO:1905819	BP	GO:1905819	negative regulation of chromosome separation	16/404	45/29008	6.6676e-19	3.1885e-17	2.60733e-17	Fbxo5/Aurkb/Birc5/Gen1/Trip13/Ccnb1/Ndc80/Bub1b/Bub1/Cenpe/Kntc1/Mad2l1/Plk1/Cdt1/Ttk/Zwilch	16
GO:0033047	BP	GO:0033047	regulation of mitotic sister chromatid segregation	16/404	46/29008	1.00949e-18	4.75649e-17	3.88951e-17	Fbxo5/Aurkb/Birc5/Gen1/Trip13/Ccnb1/Ndc80/Bub1b/Bub1/Cenpe/Kntc1/Mad2l1/Plk1/Cdt1/Ttk/Zwilch	16
GO:1902969	BP	GO:1902969	mitotic DNA replication	11/404	14/29008	1.17083e-18	5.43673e-17	4.44576e-17	Mcm3/Mcm6/Mcm4/Cdc45/Rad51/Gins1/Brca2/Mcm2/Lig1/Gins3/Pola1	11
GO:0051303	BP	GO:0051303	establishment of chromosome localization	19/404	82/29008	3.13739e-18	1.43603e-16	1.17428e-16	Kif14/Nuf2/Cenpf/Aurkb/Spag5/Birc5/Ccnb1/Cenpq/Ndc80/Cdca5/Incenp/Fam83d/Cenpe/Kif2c/Cdca8/Nudc/Brca2/Kif22/Cdt1	19
GO:0007094	BP	GO:0007094	mitotic spindle assembly checkpoint signaling	15/404	40/29008	3.25366e-18	1.44788e-16	1.18397e-16	Aurkb/Birc5/Gen1/Trip13/Ccnb1/Ndc80/Bub1b/Bub1/Cenpe/Kntc1/Mad2l1/Plk1/Cdt1/Ttk/Zwilch	15
GO:0071173	BP	GO:0071173	spindle assembly checkpoint signaling	15/404	40/29008	3.25366e-18	1.44788e-16	1.18397e-16	Aurkb/Birc5/Gen1/Trip13/Ccnb1/Ndc80/Bub1b/Bub1/Cenpe/Kntc1/Mad2l1/Plk1/Cdt1/Ttk/Zwilch	15
GO:0050000	BP	GO:0050000	chromosome localization	19/404	84/29008	5.12631e-18	2.24996e-16	1.83985e-16	Kif14/Nuf2/Cenpf/Aurkb/Spag5/Birc5/Ccnb1/Cenpq/Ndc80/Cdca5/Incenp/Fam83d/Cenpe/Kif2c/Cdca8/Nudc/Brca2/Kif22/Cdt1	19
GO:0051783	BP	GO:0051783	regulation of nuclear division	23/404	143/29008	5.27822e-18	2.28532e-16	1.86877e-16	Obsl1/Fbxo5/Aurkb/Birc5/Gen1/Trip13/Ccnb1/Cdca2/Ndc80/Kif20b/Bub1b/Nusap1/Bub1/Cenpe/Kntc1/Mad2l1/Rad51ap1/Plk1/Mki67/Cdt1/Ttk/Chek1/Zwilch	23
GO:0051784	BP	GO:0051784	negative regulation of nuclear division	17/404	62/29008	8.32895e-18	3.55813e-16	2.90958e-16	Fbxo5/Aurkb/Birc5/Gen1/Trip13/Ccnb1/Ndc80/Bub1b/Bub1/Cenpe/Kntc1/Mad2l1/Plk1/Cdt1/Ttk/Chek1/Zwilch	17
GO:0044839	BP	GO:0044839	cell cycle G2/M phase transition	23/404	146/29008	8.5307e-18	3.59636e-16	2.94085e-16	Kif14/Cenpf/Dtl/Fbxo5/Cdk1/Cdk2/Atad5/Cdc6/Birc5/Brca1/Ccnb1/Skp2/Ndc80/Lmnb1/Mastl/Nes/Ccna2/Orc1/Clspn/Plk1/Topbp1/Chek1/Ccnb2	23
GO:0006323	BP	GO:0006323	DNA packaging	23/404	155/29008	3.36901e-17	1.40186e-15	1.14634e-15	Cdk1/Top2a/Ncapg2/H2bc14/H2bc12/Ccnb1/Chaf1b/Mis18a/Chaf1a/Cdca5/Hells/Incenp/Hat1/Nusap1/Ncaph/Smc4/Smc2/Nasp/Ncapg/Mcm2/Ncapd2/Asf1b/Ncapd3	23
GO:0045005	BP	GO:0045005	DNA-dependent DNA replication maintenance of fidelity	15/404	46/29008	3.83666e-17	1.57598e-15	1.28872e-15	Dna2/Timeless/Gen1/Tonsl/Fam111a/Rad51/Pcna/Zgrf1/Mms22l/Cenps/Pole/Brca2/Pold1/Rfwd3/Traip	15
GO:0065004	BP	GO:0065004	protein-DNA complex assembly	22/404	145/29008	1.01883e-16	4.13206e-15	3.3789e-15	Cenpw/H2bc14/H2bc12/Cenph/Dlgap5/Chaf1b/Cdc45/Mis18a/Chaf1a/Hells/Hat1/Rad51/Cenpe/Nasp/Cenps/Cenpa/Kntc1/Mcm2/Asf1b/Cenpn/Cdt1/Cenpi	22
GO:0071459	BP	GO:0071459	protein localization to chromosome, centromeric region	12/404	25/29008	1.99925e-16	8.00701e-15	6.54755e-15	Cdk1/Aurkb/Haspin/Cenpq/Ndc80/Bub1b/Knl1/Cenpa/Kntc1/Cdt1/Ttk/Zwilch	12
GO:0045132	BP	GO:0045132	meiotic chromosome segregation	19/404	102/29008	2.47354e-16	9.78423e-15	8.00084e-15	Sgo2a/Nuf2/Brip1/Top2a/Trip13/Espl1/Sgo1/Bub1b/Ncaph/Bub1/Smc4/Smc2/Cenps/Brca2/Fancd2/Plk1/Ccne1/Ncapd3/Ttk	19
GO:0071824	BP	GO:0071824	protein-DNA complex subunit organization	24/404	192/29008	3.83949e-16	1.50021e-14	1.22676e-14	Ptma/Cenpw/H2bc14/H2bc12/Cenph/Dlgap5/Chaf1b/Cdc45/Mis18a/Chaf1a/Hells/Hat1/Rad51/Anp32e/Cenpe/Nasp/Cenps/Cenpa/Kntc1/Mcm2/Asf1b/Cenpn/Cdt1/Cenpi	24
GO:0000910	BP	GO:0000910	cytokinesis	23/404	182/29008	1.25406e-15	4.84098e-14	3.9586e-14	Kif14/E2f7/Myh10/Aurkb/Cdc6/Birc5/Racgap1/Kif20b/Cep55/Incenp/Nusap1/Aurka/Plk4/Ect2/Stmn1/Cenpa/Cit/Brca2/Prc1/Plk1/E2f8/Anln/Kif23	23
GO:0007098	BP	GO:0007098	centrosome cycle	20/404	128/29008	1.4284e-15	5.44832e-14	4.45524e-14	Nek2/Cdk2/Brca1/Cep131/Gen1/Haus4/Kifc1/Sgo1/Ndc80/Kif11/Cep250/Aurka/Plk4/Stil/Brca2/Plk1/Wdr62/Haus8/Pclaf/Chek1	20
GO:0007127	BP	GO:0007127	meiosis I	20/404	130/29008	1.94775e-15	7.34187e-14	6.00365e-14	Sgo2a/Fbxo5/Brip1/Top2a/Trip13/Espl1/Chtf18/Sgo1/Ndc80/Rad51/Aurka/Cenpe/Cenps/Brca2/Fancd2/Rad51ap1/Plk1/Ccne1/Topbp1/Ccnb2	20
GO:0034508	BP	GO:0034508	centromere complex assembly	12/404	30/29008	3.12299e-15	1.1635e-13	9.51423e-14	Cenpw/Cenph/Dlgap5/Mis18a/Hells/Cenpe/Nasp/Cenps/Cenpa/Kntc1/Cenpn/Cenpi	12
GO:0000086	BP	GO:0000086	G2/M transition of mitotic cell cycle	20/404	134/29008	3.56246e-15	1.31197e-13	1.07283e-13	Kif14/Cenpf/Dtl/Fbxo5/Cdk1/Cdk2/Cdc6/Birc5/Brca1/Ccnb1/Skp2/Lmnb1/Mastl/Nes/Ccna2/Orc1/Clspn/Plk1/Topbp1/Chek1	20
GO:0061982	BP	GO:0061982	meiosis I cell cycle process	20/404	135/29008	4.12925e-15	1.50342e-13	1.22939e-13	Sgo2a/Fbxo5/Brip1/Top2a/Trip13/Espl1/Chtf18/Sgo1/Ndc80/Rad51/Aurka/Cenpe/Cenps/Brca2/Fancd2/Rad51ap1/Plk1/Ccne1/Topbp1/Ccnb2	20
GO:0010639	BP	GO:0010639	negative regulation of organelle organization	30/404	364/29008	7.75902e-15	2.79325e-13	2.28411e-13	Map2/Bok/Spta1/Fbxo5/Aurkb/Birc5/Top2a/Gen1/Trip13/Ccnb1/Tbc1d4/Recql4/Kifc1/Ndc80/Bub1b/Tpx2/Bub1/Cenpe/Stmn1/Kntc1/Mad2l1/Mcm2/Myadm/Xrcc1/Plk1/Cdt1/Pif1/Ttk/Chek1/Zwilch	30
GO:0031023	BP	GO:0031023	microtubule organizing center organization	20/404	141/29008	9.75532e-15	3.47289e-13	2.83988e-13	Nek2/Cdk2/Brca1/Cep131/Gen1/Haus4/Kifc1/Sgo1/Ndc80/Kif11/Cep250/Aurka/Plk4/Stil/Brca2/Plk1/Wdr62/Haus8/Pclaf/Chek1	20
GO:0006271	BP	GO:0006271	DNA strand elongation involved in DNA replication	9/404	13/29008	1.22806e-14	4.32384e-13	3.53573e-13	Mcm3/Dna2/Mcm4/Gins1/Pcna/Pole/Mcm7/Lig1/Pola1	9
GO:0006275	BP	GO:0006275	regulation of DNA replication	18/404	110/29008	1.65058e-14	5.74834e-13	4.70058e-13	Fbxo5/Dna2/E2f7/Timeless/Cdk1/Cdk2/Atad5/Gmnn/Esco2/Dscc1/Chtf18/Pcna/Ccna2/Brca2/Dbf4/Rfc5/E2f8/Cdt1	18
GO:0034501	BP	GO:0034501	protein localization to kinetochore	10/404	19/29008	2.03027e-14	6.9202e-13	5.65884e-13	Cdk1/Aurkb/Haspin/Cenpq/Ndc80/Knl1/Kntc1/Cdt1/Ttk/Zwilch	10
GO:1903083	BP	GO:1903083	protein localization to condensed chromosome	10/404	19/29008	2.03027e-14	6.9202e-13	5.65884e-13	Cdk1/Aurkb/Haspin/Cenpq/Ndc80/Knl1/Kntc1/Cdt1/Ttk/Zwilch	10
GO:0030261	BP	GO:0030261	chromosome condensation	13/404	45/29008	2.98538e-14	1.00686e-12	8.23336e-13	Cdk1/Top2a/Ncapg2/Ccnb1/Cdca5/Incenp/Nusap1/Ncaph/Smc4/Smc2/Ncapg/Ncapd2/Ncapd3	13
GO:0051052	BP	GO:0051052	regulation of DNA metabolic process	30/404	388/29008	4.20508e-14	1.40345e-12	1.14764e-12	Nek2/Prim2/Timeless/Parpbp/Cdk2/Aurkb/Atad5/Fignl1/Brca1/Dek/Dscc1/Rmi2/Polq/Mis18a/Msh2/Chtf18/Rad51/Pcna/Rpa2/Pms2/Rfc5/Rad51ap1/Xrcc1/Ankle1/Exosc6/Cdt1/Pif1/Dnmt1/Chek1/Fancb	30
GO:0031570	BP	GO:0031570	DNA integrity checkpoint signaling	18/404	117/29008	5.03143e-14	1.66193e-12	1.35901e-12	Dtl/Dna2/Timeless/Cdk1/Cdc6/Brca1/Msh2/Wdr76/E2f1/Orc1/Clspn/Rpa2/Fancd2/Plk1/Cdt1/Rfwd3/Topbp1/Chek1	18
GO:0032508	BP	GO:0032508	DNA duplex unwinding	12/404	37/29008	6.12636e-14	2.00295e-12	1.63786e-12	Mcm3/Mcm6/Rpa1/Top2a/Recql4/Mcm4/Rad51/Mcm8/Mcm7/Mcm2/Mcm5/Pif1	12
GO:0031297	BP	GO:0031297	replication fork processing	12/404	39/29008	1.2613e-13	4.08203e-12	3.33799e-12	Dna2/Gen1/Tonsl/Fam111a/Rad51/Pcna/Zgrf1/Mms22l/Cenps/Brca2/Rfwd3/Traip	12
GO:0007143	BP	GO:0007143	female meiotic nuclear division	12/404	41/29008	2.48435e-13	7.95986e-12	6.509e-12	Sgo2a/Fbxo5/Top2a/Trip13/Ndc80/Mastl/Ncaph/Aurka/Cenpe/Plk1/Ttk/Ccnb2	12
GO:0070192	BP	GO:0070192	chromosome organization involved in meiotic cell cycle	15/404	79/29008	2.66304e-13	8.44789e-12	6.90808e-12	Sgo2a/Brip1/Trip13/Sgo1/Incenp/Bub1b/Rad51/Ncaph/Bub1/Smc4/Smc2/Fancd2/Ncapd2/Ccne1/Ncapd3	15
GO:0000281	BP	GO:0000281	mitotic cytokinesis	14/404	67/29008	4.13557e-13	1.29905e-11	1.06227e-11	Myh10/Birc5/Racgap1/Kif20b/Cep55/Incenp/Nusap1/Ect2/Stmn1/Cenpa/Cit/Plk1/Anln/Kif23	14
GO:0032392	BP	GO:0032392	DNA geometric change	12/404	44/29008	6.38868e-13	1.98731e-11	1.62508e-11	Mcm3/Mcm6/Rpa1/Top2a/Recql4/Mcm4/Rad51/Mcm8/Mcm7/Mcm2/Mcm5/Pif1	12
GO:0032465	BP	GO:0032465	regulation of cytokinesis	16/404	101/29008	8.11292e-13	2.4994e-11	2.04383e-11	Kif14/E2f7/Aurkb/Cdc6/Racgap1/Kif20b/Incenp/Aurka/Plk4/Ect2/Cit/Brca2/Prc1/Plk1/E2f8/Kif23	16
GO:0090329	BP	GO:0090329	regulation of DNA-dependent DNA replication	12/404	46/29008	1.14947e-12	3.50753e-11	2.8682e-11	Fbxo5/E2f7/Timeless/Cdk2/Dscc1/Chtf18/Pcna/Brca2/Dbf4/Rfc5/E2f8/Cdt1	12
GO:0051656	BP	GO:0051656	establishment of organelle localization	29/404	415/29008	1.43062e-12	4.32425e-11	3.53606e-11	Map2/Kif14/Nuf2/Cenpf/Myh10/Aurkb/Spag5/Birc5/Ccnb1/Kifc1/Cenpq/Ndc80/Cdca5/Incenp/Sapcd2/Nusap1/Fam83d/Cenpe/Kif2c/Cdca8/Nudc/Cenpa/Tacc3/Uchl1/Brca2/Mad2l1/Plk1/Kif22/Cdt1	29
GO:1902749	BP	GO:1902749	regulation of cell cycle G2/M phase transition	16/404	105/29008	1.50992e-12	4.5213e-11	3.69719e-11	Kif14/Cenpf/Dtl/Fbxo5/Cdk1/Cdk2/Atad5/Cdc6/Brca1/Ccnb1/Lmnb1/Orc1/Clspn/Plk1/Topbp1/Chek1	16
GO:0007076	BP	GO:0007076	mitotic chromosome condensation	8/404	13/29008	1.59995e-12	4.74652e-11	3.88136e-11	Cdca5/Nusap1/Ncaph/Smc4/Smc2/Ncapg/Ncapd2/Ncapd3	8
GO:0051302	BP	GO:0051302	regulation of cell division	20/404	186/29008	2.00067e-12	5.84623e-11	4.78062e-11	Kif14/Aspm/E2f7/Aurkb/Cdc6/Kif18b/Racgap1/Lbh/Kif20b/Incenp/Rbl1/Aurka/Plk4/Ect2/Cit/Brca2/Prc1/Plk1/E2f8/Kif23	20
GO:0007080	BP	GO:0007080	mitotic metaphase plate congression	12/404	48/29008	2.00713e-12	5.84623e-11	4.78062e-11	Kif14/Nuf2/Aurkb/Ccnb1/Ndc80/Cdca5/Cenpe/Kif2c/Cdca8/Nudc/Kif22/Cdt1	12
GO:0061640	BP	GO:0061640	cytoskeleton-dependent cytokinesis	15/404	93/29008	3.23251e-12	9.3306e-11	7.62989e-11	Myh10/Aurkb/Birc5/Racgap1/Kif20b/Cep55/Incenp/Nusap1/Ect2/Stmn1/Cenpa/Cit/Plk1/Anln/Kif23	15
GO:1901989	BP	GO:1901989	positive regulation of cell cycle phase transition	16/404	111/29008	3.64602e-12	1.04302e-10	8.52908e-11	Dtl/Fbxo5/Cdk1/Atad5/Birc5/Ccnb1/Ccnd3/Lmnb1/Cdca5/Fam83d/Ube2c/Aurka/Cenpe/Dbf4/Ezh2/Cdt1	16
GO:0051988	BP	GO:0051988	regulation of attachment of spindle microtubules to kinetochore	8/404	14/29008	3.68794e-12	1.04568e-10	8.55079e-11	Nek2/Aurkb/Spag5/Ccnb1/Racgap1/Knstrn/Cenpe/Ect2	8
GO:0044843	BP	GO:0044843	cell cycle G1/S phase transition	21/404	216/29008	3.96442e-12	1.11421e-10	9.11121e-11	Kif14/E2f7/Cdk2/Haspin/Skp2/Ccnd3/Tcf19/Fam83d/E2f1/Rbl1/Iqgap3/Ccna2/Rpa2/Cdkn2c/Nasp/Pole/Dbf4/Ezh2/Ccne1/Rfwd3/Ctdspl	21
GO:0022616	BP	GO:0022616	DNA strand elongation	9/404	21/29008	4.57438e-12	1.27446e-10	1.04216e-10	Mcm3/Dna2/Mcm4/Gins1/Pcna/Pole/Mcm7/Lig1/Pola1	9
GO:0006284	BP	GO:0006284	base-excision repair	11/404	40/29008	5.37412e-12	1.48437e-10	1.21381e-10	Dna2/Rpa1/Polq/Pcna/Rpa2/Pole/Ung/Lig1/Xrcc1/Pold1/Neil3	11
GO:0010389	BP	GO:0010389	regulation of G2/M transition of mitotic cell cycle	15/404	97/29008	6.08787e-12	1.66714e-10	1.36327e-10	Kif14/Cenpf/Dtl/Fbxo5/Cdk1/Cdk2/Cdc6/Brca1/Ccnb1/Lmnb1/Orc1/Clspn/Plk1/Topbp1/Chek1	15
GO:0007292	BP	GO:0007292	female gamete generation	18/404	166/29008	2.23752e-11	6.07544e-10	4.96805e-10	Sgo2a/Aspm/Fbxo5/Hrob/Top2a/Trip13/Ccnb1/Ndc80/Mcm8/Mastl/Ncaph/Aurka/Cenpe/Ythdc1/Brca2/Plk1/Ttk/Ccnb2	18
GO:0051382	BP	GO:0051382	kinetochore assembly	8/404	17/29008	2.87817e-11	7.74928e-10	6.3368e-10	Cenpw/Cenph/Dlgap5/Cenpe/Cenps/Cenpa/Kntc1/Cenpn	8
GO:0071897	BP	GO:0071897	DNA biosynthetic process	18/404	170/29008	3.34194e-11	8.92299e-10	7.29658e-10	Nek2/Dtl/Aurkb/Hrob/Rpa1/Tk1/Dscc1/Chtf18/Pcna/Gar1/Pole/Rfc5/Lig1/Pold1/Pif1/Pclaf/Chek1/Pola1	18
GO:0000082	BP	GO:0000082	G1/S transition of mitotic cell cycle	19/404	194/29008	3.73215e-11	9.88249e-10	8.08119e-10	Kif14/E2f7/Cdk2/Haspin/Skp2/Ccnd3/Tcf19/E2f1/Rbl1/Iqgap3/Rpa2/Cdkn2c/Nasp/Pole/Dbf4/Ezh2/Ccne1/Rfwd3/Ctdspl	19
GO:0000018	BP	GO:0000018	regulation of DNA recombination	15/404	112/29008	5.10927e-11	1.34181e-09	1.09724e-09	Timeless/Parpbp/Atad5/Fignl1/Rmi2/Polq/Msh2/Rad51/Rpa2/Pms2/Rad51ap1/Ankle1/Exosc6/Chek1/Fancb	15
GO:0000727	BP	GO:0000727	double-strand break repair via break-induced replication	7/404	12/29008	7.19829e-11	1.87507e-09	1.53329e-09	Mcm3/Mcm6/Mcm4/Cdc45/Mcm7/Mcm2/Mcm5	7
GO:0044774	BP	GO:0044774	mitotic DNA integrity checkpoint signaling	13/404	83/29008	1.34116e-10	3.46538e-09	2.83374e-09	Dtl/Cdk1/Cdc6/Brca1/Msh2/Orc1/Clspn/Rpa2/Fancd2/Plk1/Rfwd3/Topbp1/Chek1	13
GO:0007062	BP	GO:0007062	sister chromatid cohesion	11/404	55/29008	2.30683e-10	5.91288e-09	4.83512e-09	Sgo2a/Haspin/Esco2/Dscc1/Recql4/Sgo1/Cdca5/Fen1/Bub1b/Bub1/Kif22	11
GO:0006268	BP	GO:0006268	DNA unwinding involved in DNA replication	7/404	14/29008	3.04505e-10	7.74312e-09	6.33177e-09	Mcm6/Rpa1/Recql4/Mcm4/Rad51/Mcm7/Mcm2	7
GO:2001020	BP	GO:2001020	regulation of response to DNA damage stimulus	19/404	222/29008	3.815e-10	9.62462e-09	7.87032e-09	Fbxo5/Timeless/Parpbp/Atad5/Fignl1/Brca1/Dek/Rmi2/Polq/Rad51/Wdr76/Pcna/Rpa2/Rad51ap1/Xrcc1/Ankle1/Rfwd3/Chek1/Fancb	19
GO:0032200	BP	GO:0032200	telomere organization	15/404	130/29008	4.38399e-10	1.09737e-08	8.97349e-09	Nek2/Dna2/Aurkb/Rpa1/Recql4/Hat1/Rad51/Pcna/Gar1/Rpa2/Brca2/Ezh2/Xrcc1/Ccne1/Pif1	15
GO:0000076	BP	GO:0000076	DNA replication checkpoint signaling	7/404	16/29008	9.90875e-10	2.46106e-08	2.01248e-08	Dna2/Timeless/Cdc6/Orc1/Clspn/Cdt1/Topbp1	7
GO:0010569	BP	GO:0010569	regulation of double-strand break repair via homologous recombination	10/404	48/29008	1.00311e-09	2.47227e-08	2.02165e-08	Timeless/Parpbp/Fignl1/Rmi2/Polq/Rad51/Rpa2/Rad51ap1/Chek1/Fancb	10
GO:0090306	BP	GO:0090306	meiotic spindle assembly	6/404	10/29008	1.40889e-09	3.44588e-08	2.81779e-08	Aspm/Fbxo5/Ndc80/Aurka/Cenpe/Ccnb2	6
GO:0090307	BP	GO:0090307	mitotic spindle assembly	11/404	66/29008	1.80544e-09	4.38229e-08	3.58352e-08	Nek2/Aurkb/Racgap1/Kifc1/Kif11/Tpx2/Mybl2/Prc1/Plk1/Ccsap/Kif23	11
GO:0042770	BP	GO:0042770	signal transduction in response to DNA damage	16/404	167/29008	1.83344e-09	4.4168e-08	3.61174e-08	Dtl/E2f7/Cdk1/Atad5/Brca1/Msh2/Wdr76/E2f1/Clspn/Rpa2/Brca2/Fancd2/Plk1/Rfwd3/Topbp1/Chek1	16
GO:1901976	BP	GO:1901976	regulation of cell cycle checkpoint	9/404	38/29008	2.05786e-09	4.92043e-08	4.02358e-08	Gen1/Ccnb1/Ndc80/Wdr76/Aurka/Rpa2/Mad2l1/Cdt1/Rfwd3	9
GO:0051054	BP	GO:0051054	positive regulation of DNA metabolic process	18/404	222/29008	2.6392e-09	6.2637e-08	5.122e-08	Nek2/Prim2/Timeless/Cdk2/Aurkb/Atad5/Brca1/Dscc1/Msh2/Chtf18/Rad51/Pcna/Pms2/Rfc5/Rad51ap1/Xrcc1/Exosc6/Fancb	18
GO:0006282	BP	GO:0006282	regulation of DNA repair	14/404	128/29008	3.40666e-09	8.02569e-08	6.56283e-08	Timeless/Parpbp/Fignl1/Brca1/Dek/Rmi2/Polq/Rad51/Pcna/Rpa2/Rad51ap1/Xrcc1/Chek1/Fancb	14
GO:0000212	BP	GO:0000212	meiotic spindle organization	7/404	19/29008	4.20965e-09	9.84504e-08	8.05057e-08	Aspm/Fbxo5/Espl1/Ndc80/Aurka/Cenpe/Ccnb2	7
GO:1901992	BP	GO:1901992	positive regulation of mitotic cell cycle phase transition	12/404	90/29008	4.6632e-09	1.08267e-07	8.85331e-08	Dtl/Fbxo5/Cdk1/Birc5/Ccnb1/Ccnd3/Lmnb1/Cdca5/Ube2c/Cenpe/Dbf4/Cdt1	12
GO:0000077	BP	GO:0000077	DNA damage checkpoint signaling	13/404	110/29008	4.78917e-09	1.10392e-07	9.02708e-08	Dtl/Cdk1/Brca1/Msh2/Wdr76/E2f1/Clspn/Rpa2/Fancd2/Plk1/Rfwd3/Topbp1/Chek1	13
GO:0007144	BP	GO:0007144	female meiosis I	6/404	13/29008	1.11116e-08	2.52494e-07	2.06471e-07	Fbxo5/Trip13/Ndc80/Aurka/Cenpe/Ccnb2	6
GO:0051315	BP	GO:0051315	attachment of mitotic spindle microtubules to kinetochore	6/404	13/29008	1.11116e-08	2.52494e-07	2.06471e-07	Nuf2/Aurkb/Ndc80/Cenpe/Kif2c/Cdt1	6
GO:0044773	BP	GO:0044773	mitotic DNA damage checkpoint signaling	11/404	79/29008	1.29197e-08	2.91512e-07	2.38378e-07	Dtl/Cdk1/Brca1/Msh2/Clspn/Rpa2/Fancd2/Plk1/Rfwd3/Topbp1/Chek1	11
GO:0045740	BP	GO:0045740	positive regulation of DNA replication	9/404	48/29008	1.87226e-08	4.19491e-07	3.43029e-07	Dna2/E2f7/Cdk1/Cdk2/Atad5/Pcna/Dbf4/E2f8/Cdt1	9
GO:0000723	BP	GO:0000723	telomere maintenance	13/404	125/29008	2.29112e-08	5.06258e-07	4.13981e-07	Nek2/Dna2/Aurkb/Rpa1/Recql4/Rad51/Pcna/Gar1/Rpa2/Brca2/Xrcc1/Ccne1/Pif1	13
GO:0045931	BP	GO:0045931	positive regulation of mitotic cell cycle	13/404	125/29008	2.29112e-08	5.06258e-07	4.13981e-07	Dtl/Fbxo5/Cdk1/Birc5/Ccnb1/Ccnd3/Lmnb1/Cdca5/Ube2c/Cenpe/Brca2/Dbf4/Cdt1	13
GO:2000779	BP	GO:2000779	regulation of double-strand break repair	11/404	84/29008	2.49522e-08	5.47582e-07	4.47773e-07	Timeless/Parpbp/Fignl1/Dek/Rmi2/Polq/Rad51/Rpa2/Rad51ap1/Chek1/Fancb	11
GO:0044818	BP	GO:0044818	mitotic G2/M transition checkpoint	9/404	50/29008	2.72908e-08	5.94828e-07	4.86407e-07	Dtl/Cdk1/Cdc6/Brca1/Orc1/Clspn/Plk1/Topbp1/Chek1	9
GO:0007131	BP	GO:0007131	reciprocal meiotic recombination	9/404	54/29008	5.51493e-08	1.18589e-06	9.69739e-07	Brip1/Top2a/Trip13/Chtf18/Rad51/Cenps/Fancd2/Rad51ap1/Topbp1	9
GO:0140527	BP	GO:0140527	reciprocal homologous recombination	9/404	54/29008	5.51493e-08	1.18589e-06	9.69739e-07	Brip1/Top2a/Trip13/Chtf18/Rad51/Cenps/Fancd2/Rad51ap1/Topbp1	9
GO:0035825	BP	GO:0035825	homologous recombination	9/404	55/29008	6.51346e-08	1.39128e-06	1.13768e-06	Brip1/Top2a/Trip13/Chtf18/Rad51/Cenps/Fancd2/Rad51ap1/Topbp1	9
GO:0051298	BP	GO:0051298	centrosome duplication	10/404	74/29008	7.98555e-08	1.69442e-06	1.38557e-06	Cdk2/Brca1/Cep131/Gen1/Kifc1/Ndc80/Plk4/Stil/Brca2/Wdr62	10
GO:0090231	BP	GO:0090231	regulation of spindle checkpoint	6/404	19/29008	1.63672e-07	3.45003e-06	2.82119e-06	Gen1/Ccnb1/Ndc80/Aurka/Mad2l1/Cdt1	6
GO:0010972	BP	GO:0010972	negative regulation of G2/M transition of mitotic cell cycle	9/404	61/29008	1.65034e-07	3.456e-06	2.82607e-06	Dtl/Cdk1/Cdc6/Brca1/Orc1/Clspn/Plk1/Topbp1/Chek1	9
GO:1902750	BP	GO:1902750	negative regulation of cell cycle G2/M phase transition	9/404	63/29008	2.19775e-07	4.57246e-06	3.73903e-06	Dtl/Cdk1/Cdc6/Brca1/Orc1/Clspn/Plk1/Topbp1/Chek1	9
GO:0000731	BP	GO:0000731	DNA synthesis involved in DNA repair	7/404	32/29008	2.40538e-07	4.94029e-06	4.03981e-06	Dtl/Hrob/Pcna/Pole/Pold1/Pclaf/Pola1	7
GO:0036297	BP	GO:0036297	interstrand cross-link repair	7/404	32/29008	2.40538e-07	4.94029e-06	4.03981e-06	Hrob/Rad51/Mcm8/Fancd2/Rad51ap1/Rfwd3/Fancb	7
GO:0006325	BP	GO:0006325	chromatin organization	23/404	477/29008	3.10078e-07	6.32797e-06	5.17456e-06	Ptma/Cbx2/Haspin/Epop/H2bc14/H2bc12/Dek/Wdhd1/Atad2/Chaf1b/Mis18a/Chaf1a/Uhrf1/Hells/Hat1/Rbl1/Anp32e/Nasp/Ezh2/Mcm2/Mki67/Asf1b/Dnmt1	23
GO:0006335	BP	GO:0006335	DNA replication-dependent nucleosome assembly	5/404	12/29008	3.73578e-07	7.52795e-06	6.15581e-06	Chaf1b/Chaf1a/Hat1/Nasp/Asf1b	5
GO:0034723	BP	GO:0034723	DNA replication-dependent nucleosome organization	5/404	12/29008	3.73578e-07	7.52795e-06	6.15581e-06	Chaf1b/Chaf1a/Hat1/Nasp/Asf1b	5
GO:0032467	BP	GO:0032467	positive regulation of cytokinesis	8/404	51/29008	4.98393e-07	9.98032e-06	8.16119e-06	Kif14/Aurkb/Cdc6/Racgap1/Kif20b/Ect2/Cit/Kif23	8
GO:0045143	BP	GO:0045143	homologous chromosome segregation	9/404	70/29008	5.54216e-07	1.10293e-05	9.01893e-06	Sgo2a/Brip1/Trip13/Espl1/Sgo1/Brca2/Fancd2/Plk1/Ccne1	9
GO:0022412	BP	GO:0022412	cellular process involved in reproduction in multicellular organism	23/404	495/29008	5.89961e-07	1.16681e-05	9.54135e-06	Sgo2a/Aspm/Fbxo5/Fignl1/Brip1/Top2a/Cep131/Trip13/Ccnb1/Cxadr/Msh2/Chtf18/Ndc80/Mastl/Ncaph/Aurka/Cenpe/Ythdc1/Brca2/Plk1/Hmgb2/Ttk/Ccnb2	23
GO:2000105	BP	GO:2000105	positive regulation of DNA-dependent DNA replication	5/404	13/29008	6.00119e-07	1.17962e-05	9.64609e-06	E2f7/Cdk2/Dbf4/E2f8/Cdt1	5
GO:0007095	BP	GO:0007095	mitotic G2 DNA damage checkpoint signaling	7/404	37/29008	6.92926e-07	1.35374e-05	1.10699e-05	Dtl/Cdk1/Brca1/Clspn/Plk1/Topbp1/Chek1	7
GO:0000079	BP	GO:0000079	regulation of cyclin-dependent protein serine/threonine kinase activity	9/404	72/29008	7.07769e-07	1.37436e-05	1.12385e-05	Cdc6/Ccnb1/Ccnd3/Ccna2/Stil/Cdkn2c/Plk1/Ccne1/Ccnb2	9
GO:0009314	BP	GO:0009314	response to radiation	21/404	430/29008	8.28392e-07	1.5989e-05	1.30746e-05	Col3a1/Dtl/Aurkb/Fignl1/Adra1b/Brca1/Pbk/Msh2/Rad51/Cep250/Itgb6/Pcna/Ect2/Brca2/Fancd2/Rad51ap1/Pold1/Rfwd3/Pclaf/Topbp1/Chek1	21
GO:0016446	BP	GO:0016446	somatic hypermutation of immunoglobulin genes	5/404	14/29008	9.22843e-07	1.77053e-05	1.44781e-05	Exo1/Polq/Msh2/Ung/Pms2	5
GO:0006298	BP	GO:0006298	mismatch repair	6/404	25/29008	9.95371e-07	1.89831e-05	1.5523e-05	Exo1/Rpa1/Msh2/Pcna/Rpa2/Pms2	6
GO:0051653	BP	GO:0051653	spindle localization	8/404	56/29008	1.04634e-06	1.9837e-05	1.62213e-05	Aspm/Spag5/Ndc80/Sapcd2/Nusap1/Cenpa/Mad2l1/Plk1	8
GO:1904029	BP	GO:1904029	regulation of cyclin-dependent protein kinase activity	9/404	76/29008	1.12804e-06	2.12602e-05	1.73851e-05	Cdc6/Ccnb1/Ccnd3/Ccna2/Stil/Cdkn2c/Plk1/Ccne1/Ccnb2	9
GO:0072698	BP	GO:0072698	protein localization to microtubule cytoskeleton	8/404	57/29008	1.20249e-06	2.25308e-05	1.8424e-05	Spag5/Cep131/Kif20b/Cep250/Fam83d/Aurka/Stil/Ttk	8
GO:0006301	BP	GO:0006301	postreplication repair	6/404	26/29008	1.27883e-06	2.38219e-05	1.94798e-05	Dtl/Brca1/Msh2/Pcna/Pold1/Pclaf	6
GO:0002566	BP	GO:0002566	somatic diversification of immune receptors via somatic mutation	5/404	15/29008	1.36844e-06	2.50542e-05	2.04875e-05	Exo1/Polq/Msh2/Ung/Pms2	5
GO:0007135	BP	GO:0007135	meiosis II	5/404	15/29008	1.36844e-06	2.50542e-05	2.04875e-05	Sgo2a/Sgo1/Bub1b/Mastl/Bub1	5
GO:0061983	BP	GO:0061983	meiosis II cell cycle process	5/404	15/29008	1.36844e-06	2.50542e-05	2.04875e-05	Sgo2a/Sgo1/Bub1b/Mastl/Bub1	5
GO:1902806	BP	GO:1902806	regulation of cell cycle G1/S phase transition	12/404	150/29008	1.38758e-06	2.52602e-05	2.0656e-05	Kif14/E2f7/Haspin/Ccnd3/Fam83d/E2f1/Rbl1/Rpa2/Dbf4/Ezh2/Rfwd3/Ctdspl	12
GO:0034728	BP	GO:0034728	nucleosome organization	11/404	125/29008	1.49661e-06	2.70912e-05	2.21532e-05	Ptma/H2bc14/H2bc12/Chaf1b/Mis18a/Chaf1a/Hat1/Anp32e/Nasp/Mcm2/Asf1b	11
GO:0051307	BP	GO:0051307	meiotic chromosome separation	6/404	27/29008	1.62495e-06	2.92491e-05	2.39178e-05	Top2a/Espl1/Ncaph/Cenps/Ncapd3/Ttk	6
GO:2000045	BP	GO:2000045	regulation of G1/S transition of mitotic cell cycle	11/404	128/29008	1.89229e-06	3.3871e-05	2.76972e-05	Kif14/E2f7/Haspin/Ccnd3/E2f1/Rbl1/Rpa2/Dbf4/Ezh2/Rfwd3/Ctdspl	11
GO:0051984	BP	GO:0051984	positive regulation of chromosome segregation	5/404	16/29008	1.96771e-06	3.50252e-05	2.86411e-05	Aurkb/Cdc6/Ccnb1/Cenpe/Cdt1	5
GO:0031497	BP	GO:0031497	chromatin assembly	10/404	104/29008	2.00305e-06	3.54573e-05	2.89944e-05	H2bc14/H2bc12/Chaf1b/Mis18a/Chaf1a/Hells/Hat1/Nasp/Mcm2/Asf1b	10
GO:0044380	BP	GO:0044380	protein localization to cytoskeleton	8/404	61/29008	2.04149e-06	3.59392e-05	2.93885e-05	Spag5/Cep131/Kif20b/Cep250/Fam83d/Aurka/Stil/Ttk	8
GO:0006334	BP	GO:0006334	nucleosome assembly	9/404	82/29008	2.15598e-06	3.77474e-05	3.08671e-05	H2bc14/H2bc12/Chaf1b/Mis18a/Chaf1a/Hat1/Nasp/Mcm2/Asf1b	9
GO:0090266	BP	GO:0090266	regulation of mitotic cell cycle spindle assembly checkpoint	5/404	17/29008	2.75573e-06	4.75019e-05	3.88436e-05	Gen1/Ccnb1/Ndc80/Mad2l1/Cdt1	5
GO:1903504	BP	GO:1903504	regulation of mitotic spindle checkpoint	5/404	17/29008	2.75573e-06	4.75019e-05	3.88436e-05	Gen1/Ccnb1/Ndc80/Mad2l1/Cdt1	5
GO:0010212	BP	GO:0010212	response to ionizing radiation	11/404	133/29008	2.7576e-06	4.75019e-05	3.88436e-05	Fignl1/Brca1/Msh2/Rad51/Itgb6/Ect2/Brca2/Fancd2/Rad51ap1/Rfwd3/Topbp1	11
GO:1902751	BP	GO:1902751	positive regulation of cell cycle G2/M phase transition	6/404	30/29008	3.14641e-06	5.39097e-05	4.40835e-05	Dtl/Fbxo5/Cdk1/Atad5/Ccnb1/Lmnb1	6
GO:0001833	BP	GO:0001833	inner cell mass cell proliferation	5/404	18/29008	3.77205e-06	6.39452e-05	5.22898e-05	Ncapg2/Gins1/Brca2/Palb2/Chek1	5
GO:0009263	BP	GO:0009263	deoxyribonucleotide biosynthetic process	5/404	18/29008	3.77205e-06	6.39452e-05	5.22898e-05	Rrm2/Dut/Dck/Tyms/Rrm1	5
GO:0032886	BP	GO:0032886	regulation of microtubule-based process	15/404	262/29008	4.70069e-06	7.92685e-05	6.48201e-05	Map2/Spag5/Cep131/Gen1/Ska3/Kifc1/Ska1/Tpx2/Plk4/Stil/Stmn1/Tacc3/Plk1/Wdr62/Ccsap	15
GO:0071168	BP	GO:0071168	protein localization to chromatin	6/404	33/29008	5.66546e-06	9.50374e-05	7.77147e-05	Esco2/Msh2/Cdca5/Mcm8/Ezh2/Plk1	6
GO:0051293	BP	GO:0051293	establishment of spindle localization	7/404	51/29008	6.58939e-06	0.00010996	8.99177e-05	Spag5/Ndc80/Sapcd2/Nusap1/Cenpa/Mad2l1/Plk1	7
GO:0007063	BP	GO:0007063	regulation of sister chromatid cohesion	5/404	20/29008	6.67065e-06	0.00011074	9.05549e-05	Sgo2a/Recql4/Cdca5/Fen1/Bub1	5
GO:0033314	BP	GO:0033314	mitotic DNA replication checkpoint signaling	4/404	10/29008	7.2848e-06	0.00011848	9.68841e-05	Cdc6/Orc1/Clspn/Topbp1	4
GO:0070601	BP	GO:0070601	centromeric sister chromatid cohesion	4/404	10/29008	7.2848e-06	0.00011848	9.68841e-05	Sgo2a/Sgo1/Bub1b/Bub1	4
GO:1900262	BP	GO:1900262	regulation of DNA-directed DNA polymerase activity	4/404	10/29008	7.2848e-06	0.00011848	9.68841e-05	Dscc1/Chtf18/Pcna/Rfc5	4
GO:1900264	BP	GO:1900264	positive regulation of DNA-directed DNA polymerase activity	4/404	10/29008	7.2848e-06	0.00011848	9.68841e-05	Dscc1/Chtf18/Pcna/Rfc5	4
GO:0045911	BP	GO:0045911	positive regulation of DNA recombination	7/404	52/29008	7.52388e-06	0.00012175	9.95585e-05	Timeless/Atad5/Msh2/Pms2/Rad51ap1/Exosc6/Fancb	7
GO:0051781	BP	GO:0051781	positive regulation of cell division	9/404	97/29008	8.75183e-06	0.000140909	0.000115225	Kif14/Aurkb/Cdc6/Racgap1/Lbh/Kif20b/Ect2/Cit/Kif23	9
GO:0040001	BP	GO:0040001	establishment of mitotic spindle localization	6/404	36/29008	9.6181e-06	0.000154082	0.000125997	Ndc80/Sapcd2/Nusap1/Cenpa/Mad2l1/Plk1	6
GO:0007019	BP	GO:0007019	microtubule depolymerization	7/404	54/29008	9.72459e-06	0.000155013	0.000126758	Map2/Kif18b/Tpx2/Stmn1/Kif24/Kif2c/Ccsap	7
GO:0016445	BP	GO:0016445	somatic diversification of immunoglobulins	8/404	75/29008	9.87115e-06	0.00015657	0.000128032	Exo1/Atad5/Polq/Msh2/Ung/Pms2/Ezh2/Exosc6	8
GO:0031109	BP	GO:0031109	microtubule polymerization or depolymerization	10/404	126/29008	1.12749e-05	0.000177955	0.000145519	Map2/Fbxo5/Kif18b/Ska3/Ska1/Tpx2/Stmn1/Kif24/Kif2c/Ccsap	10
GO:0016572	BP	GO:0016572	histone phosphorylation	6/404	37/29008	1.13456e-05	0.000178192	0.000145712	Cdk2/Aurkb/Haspin/Ccnb1/Incenp/Ccna2	6
GO:0006333	BP	GO:0006333	chromatin assembly or disassembly	10/404	127/29008	1.20889e-05	0.000188941	0.000154502	H2bc14/H2bc12/Chaf1b/Mis18a/Chaf1a/Hells/Hat1/Nasp/Mcm2/Asf1b	10
GO:0051294	BP	GO:0051294	establishment of spindle orientation	6/404	38/29008	1.33155e-05	0.000207101	0.000169352	Spag5/Ndc80/Sapcd2/Cenpa/Mad2l1/Plk1	6
GO:0032506	BP	GO:0032506	cytokinetic process	6/404	39/29008	1.55527e-05	0.000240729	0.000196851	Aurkb/Racgap1/Kif20b/Cep55/Ect2/Anln	6
GO:0006266	BP	GO:0006266	DNA ligation	4/404	12/29008	1.67956e-05	0.000257479	0.000210547	Top2a/Rad51/Lig1/Xrcc1	4
GO:0007100	BP	GO:0007100	mitotic centrosome separation	4/404	12/29008	1.67956e-05	0.000257479	0.000210547	Nek2/Kif11/Aurka/Chek1	4
GO:0006312	BP	GO:0006312	mitotic recombination	5/404	25/29008	2.15853e-05	0.00032933	0.000269302	Gen1/Rad51/Brca2/Xrcc1/Ankle1	5
GO:0061351	BP	GO:0061351	neural precursor cell proliferation	12/404	197/29008	2.27226e-05	0.000345039	0.000282148	Kif14/Aspm/Gli3/Racgap1/Cip2a/Pitx3/Lhx2/Nes/Melk/Tacc3/Wdr62/Shcbp1	12
GO:0045144	BP	GO:0045144	meiotic sister chromatid segregation	4/404	13/29008	2.39935e-05	0.000359231	0.000293753	Sgo2a/Sgo1/Bub1b/Bub1	4
GO:0051177	BP	GO:0051177	meiotic sister chromatid cohesion	4/404	13/29008	2.39935e-05	0.000359231	0.000293753	Sgo2a/Sgo1/Bub1b/Bub1	4
GO:0051299	BP	GO:0051299	centrosome separation	4/404	13/29008	2.39935e-05	0.000359231	0.000293753	Nek2/Kif11/Aurka/Chek1	4
GO:0021987	BP	GO:0021987	cerebral cortex development	9/404	111/29008	2.60819e-05	0.00038868	0.000317835	Col3a1/Kif14/Aspm/Gli3/Ptprs/Lhx2/Lrp8/Tacc3/Wdr62	9
GO:0002200	BP	GO:0002200	somatic diversification of immune receptors	8/404	86/29008	2.71784e-05	0.000403147	0.000329664	Exo1/Atad5/Polq/Msh2/Ung/Pms2/Ezh2/Exosc6	8
GO:0010971	BP	GO:0010971	positive regulation of G2/M transition of mitotic cell cycle	5/404	27/29008	3.20554e-05	0.000473298	0.000387029	Dtl/Fbxo5/Cdk1/Ccnb1/Lmnb1	5
GO:0006338	BP	GO:0006338	chromatin remodeling	12/404	208/29008	3.87513e-05	0.000569537	0.000465726	Ptma/H2bc14/H2bc12/Chaf1b/Mis18a/Chaf1a/Hells/Hat1/Anp32e/Nasp/Mcm2/Asf1b	12
GO:0031032	BP	GO:0031032	actomyosin structure organization	12/404	210/29008	4.25341e-05	0.000622279	0.000508855	Csrp1/Tnnt2/Cnn2/Myh10/Racgap1/Actc1/Ect2/Stmn1/Cit/Tnnt3/Acta1/Anln	12
GO:0016447	BP	GO:0016447	somatic recombination of immunoglobulin gene segments	7/404	68/29008	4.50393e-05	0.000655936	0.000536377	Exo1/Atad5/Msh2/Ung/Pms2/Ezh2/Exosc6	7
GO:0045910	BP	GO:0045910	negative regulation of DNA recombination	6/404	47/29008	4.65994e-05	0.000675586	0.000552445	Parpbp/Rmi2/Polq/Msh2/Ankle1/Fancb	6
GO:2000134	BP	GO:2000134	negative regulation of G1/S transition of mitotic cell cycle	7/404	70/29008	5.43817e-05	0.000784861	0.000641802	E2f7/Haspin/Rbl1/Rpa2/Ezh2/Rfwd3/Ctdspl	7
GO:0051261	BP	GO:0051261	protein depolymerization	9/404	124/29008	6.25073e-05	0.000898087	0.00073439	Map2/Spta1/Kif18b/Tpx2/Nes/Stmn1/Kif24/Kif2c/Ccsap	9
GO:0001832	BP	GO:0001832	blastocyst growth	5/404	31/29008	6.44473e-05	0.000921827	0.000753804	Ncapg2/Gins1/Brca2/Palb2/Chek1	5
GO:2000179	BP	GO:2000179	positive regulation of neural precursor cell proliferation	7/404	72/29008	6.52531e-05	0.000929205	0.000759836	Aspm/Gli3/Cip2a/Pitx3/Lhx2/Nes/Wdr62	7
GO:0055001	BP	GO:0055001	muscle cell development	12/404	221/29008	6.95952e-05	0.000986651	0.000806812	Myog/Csrp1/Tnnt2/Myf5/Myh10/Adra1b/Cxadr/Bin1/Actc1/Uchl1/Tnnt3/Acta1	12
GO:0050767	BP	GO:0050767	regulation of neurogenesis	18/404	451/29008	7.29238e-05	0.00102929	0.000841676	Map2/Aspm/Obsl1/Serpinf1/Sox11/Gli3/Ptprs/Bin1/Pitx3/Lhx2/E2f1/Lrp8/Sema3a/Cit/Ezh2/Wdr62/Idh2/Hmgb2	18
GO:0000132	BP	GO:0000132	establishment of mitotic spindle orientation	5/404	32/29008	7.55135e-05	0.00106116	0.000867743	Ndc80/Sapcd2/Cenpa/Mad2l1/Plk1	5
GO:0006289	BP	GO:0006289	nucleotide-excision repair	6/404	52/29008	8.33264e-05	0.00116077	0.000949197	Rpa1/Brip1/Rpa2/Pole/Brca2/Pold1	6
GO:0046605	BP	GO:0046605	regulation of centrosome cycle	6/404	52/29008	8.33264e-05	0.00116077	0.000949197	Cep131/Gen1/Kifc1/Plk4/Stil/Wdr62	6
GO:0019985	BP	GO:0019985	translesion synthesis	4/404	18/29008	9.7171e-05	0.00133641	0.00109282	Dtl/Pcna/Pold1/Pclaf	4
GO:2000042	BP	GO:2000042	negative regulation of double-strand break repair via homologous recombination	4/404	18/29008	9.7171e-05	0.00133641	0.00109282	Parpbp/Rmi2/Polq/Fancb	4
GO:0021543	BP	GO:0021543	pallium development	10/404	162/29008	9.71857e-05	0.00133641	0.00109282	Col3a1/Kif14/Aspm/Gli3/Ptprs/Lhx2/Lrp8/Tacc3/Xrcc1/Wdr62	10
GO:1902807	BP	GO:1902807	negative regulation of cell cycle G1/S phase transition	7/404	77/29008	0.000100367	0.00136841	0.00111899	E2f7/Haspin/Rbl1/Rpa2/Ezh2/Rfwd3/Ctdspl	7
GO:2001021	BP	GO:2001021	negative regulation of response to DNA damage stimulus	7/404	77/29008	0.000100367	0.00136841	0.00111899	Fbxo5/Parpbp/Atad5/Rmi2/Polq/Xrcc1/Fancb	7
GO:0051053	BP	GO:0051053	negative regulation of DNA metabolic process	9/404	132/29008	0.000101393	0.00137653	0.00112563	Parpbp/Rmi2/Polq/Msh2/Xrcc1/Ankle1/Pif1/Chek1/Fancb	9
GO:0001556	BP	GO:0001556	oocyte maturation	5/404	34/29008	0.000101984	0.00137872	0.00112742	Fbxo5/Trip13/Ccnb1/Aurka/Brca2	5
GO:0002562	BP	GO:0002562	somatic diversification of immune receptors via germline recombination within a single locus	7/404	78/29008	0.000108958	0.00146068	0.00119444	Exo1/Atad5/Msh2/Ung/Pms2/Ezh2/Exosc6	7
GO:0016444	BP	GO:0016444	somatic cell DNA recombination	7/404	78/29008	0.000108958	0.00146068	0.00119444	Exo1/Atad5/Msh2/Ung/Pms2/Ezh2/Exosc6	7
GO:0071539	BP	GO:0071539	protein localization to centrosome	5/404	36/29008	0.000135051	0.00180293	0.00147431	Spag5/Cep131/Cep250/Aurka/Stil	5
GO:0006336	BP	GO:0006336	DNA replication-independent nucleosome assembly	4/404	20/29008	0.0001505	0.00200083	0.00163614	Mis18a/Hat1/Nasp/Asf1b	4
GO:0071478	BP	GO:0071478	cellular response to radiation	10/404	172/29008	0.000159153	0.00210713	0.00172306	Aurkb/Fignl1/Pbk/Rad51/Itgb6/Pcna/Ect2/Rad51ap1/Pold1/Chek1	10
GO:0002204	BP	GO:0002204	somatic recombination of immunoglobulin genes involved in immune response	6/404	59/29008	0.00016992	0.00222213	0.0018171	Exo1/Atad5/Msh2/Ung/Pms2/Exosc6	6
GO:0002208	BP	GO:0002208	somatic diversification of immunoglobulins involved in immune response	6/404	59/29008	0.00016992	0.00222213	0.0018171	Exo1/Atad5/Msh2/Ung/Pms2/Exosc6	6
GO:0045190	BP	GO:0045190	isotype switching	6/404	59/29008	0.00016992	0.00222213	0.0018171	Exo1/Atad5/Msh2/Ung/Pms2/Exosc6	6
GO:1905508	BP	GO:1905508	protein localization to microtubule organizing center	5/404	38/29008	0.000175754	0.00228908	0.00187185	Spag5/Cep131/Cep250/Aurka/Stil	5
GO:0034724	BP	GO:0034724	DNA replication-independent nucleosome organization	4/404	21/29008	0.000183875	0.00238516	0.00195041	Mis18a/Hat1/Nasp/Asf1b	4
GO:0060537	BP	GO:0060537	muscle tissue development	18/404	486/29008	0.000184708	0.00238631	0.00195136	Col3a1/Myog/Csrp1/Tnni1/Tnnt2/Cenpf/Vgll2/Cdk1/Myf5/Myh10/Adra1b/Sox11/Rbm24/Ccnb1/Cxadr/Actc1/Jph2/Acta1	18
GO:0043624	BP	GO:0043624	cellular protein complex disassembly	9/404	145/29008	0.000206822	0.00266128	0.0021762	Map2/Spta1/Kif18b/Tpx2/Nes/Stmn1/Kif24/Kif2c/Ccsap	9
GO:0090224	BP	GO:0090224	regulation of spindle organization	5/404	40/29008	0.000225202	0.00288619	0.00236012	Spag5/Tpx2/Tacc3/Plk1/Ccsap	5
GO:0007018	BP	GO:0007018	microtubule-based movement	16/404	413/29008	0.000253305	0.00322235	0.002635	Map2/Kif14/Kif18b/Cep131/Kifc1/Kif20b/Kif11/Bbs12/Cenpe/Kif24/Kif2c/Uchl1/Kif22/Kif15/Kif23/Kif4	16
GO:0009411	BP	GO:0009411	response to UV	9/404	149/29008	0.000253443	0.00322235	0.002635	Dtl/Aurkb/Pbk/Msh2/Pcna/Brca2/Pold1/Pclaf/Chek1	9
GO:2000278	BP	GO:2000278	regulation of DNA biosynthetic process	8/404	118/29008	0.000254789	0.00322666	0.00263853	Nek2/Aurkb/Dscc1/Chtf18/Pcna/Rfc5/Pif1/Chek1	8
GO:1904666	BP	GO:1904666	regulation of ubiquitin protein ligase activity	4/404	23/29008	0.000266125	0.00335695	0.00274507	Fbxo5/Mastl/Mad2l1/Plk1	4
GO:0030010	BP	GO:0030010	establishment of cell polarity	9/404	151/29008	0.000279833	0.00351602	0.00287515	Map2/Spag5/Ndc80/Kif20b/Sapcd2/Cenpa/Mad2l1/Wee1/Plk1	9
GO:0021537	BP	GO:0021537	telencephalon development	12/404	257/29008	0.00028458	0.0035617	0.0029125	Col3a1/Kif14/Aspm/Myh10/Gli3/Ptprs/Lhx2/Lrp8/Sema3a/Tacc3/Xrcc1/Wdr62	12
GO:2000177	BP	GO:2000177	regulation of neural precursor cell proliferation	8/404	120/29008	0.000285712	0.00356195	0.0029127	Aspm/Gli3/Cip2a/Pitx3/Lhx2/Nes/Wdr62/Shcbp1	8
GO:0009157	BP	GO:0009157	deoxyribonucleoside monophosphate biosynthetic process	3/404	10/29008	0.000299201	0.00368708	0.00301503	Dut/Dck/Tyms	3
GO:0010216	BP	GO:0010216	maintenance of DNA methylation	3/404	10/29008	0.000299201	0.00368708	0.00301503	Uhrf1/Hells/Dnmt1	3
GO:1901978	BP	GO:1901978	positive regulation of cell cycle checkpoint	3/404	10/29008	0.000299201	0.00368708	0.00301503	Gen1/Ndc80/Mad2l1	3
GO:0040029	BP	GO:0040029	regulation of gene expression, epigenetic	8/404	123/29008	0.000337788	0.00414663	0.00339082	Brca1/Hells/Lhx2/Hat1/Ythdc1/Ezh2/Dnmt1/Chek1	8
GO:0002312	BP	GO:0002312	B cell activation involved in immune response	7/404	94/29008	0.000349076	0.00426886	0.00349076	Exo1/Atad5/Msh2/Ung/Pms2/Exosc6/Dock11	7
GO:0007163	BP	GO:0007163	establishment or maintenance of cell polarity	11/404	226/29008	0.000356189	0.00433927	0.00354834	Map2/Spag5/Ndc80/Kif20b/Sapcd2/Lhx2/Kif2c/Cenpa/Mad2l1/Wee1/Plk1	11
GO:0001824	BP	GO:0001824	blastocyst development	9/404	157/29008	0.000372996	0.00452681	0.0037017	Nek2/Rrm2/Ncapg2/Gins1/Nasp/Brca2/Palb2/Asf1b/Chek1	9
GO:0042692	BP	GO:0042692	muscle cell differentiation	16/404	428/29008	0.000375356	0.00453826	0.00371106	Myog/Csrp1/Tnnt2/Myf5/Myh10/Adra1b/Rbm24/Cxadr/Bin1/Actc1/Npnt/Uchl1/Ezh2/Tnnt3/Acta1/Dnmt1	16
GO:0030239	BP	GO:0030239	myofibril assembly	6/404	69/29008	0.000402277	0.00482733	0.00394744	Csrp1/Tnnt2/Myh10/Actc1/Tnnt3/Acta1	6
GO:0055002	BP	GO:0055002	striated muscle cell development	6/404	69/29008	0.000402277	0.00482733	0.00394744	Csrp1/Tnnt2/Myh10/Actc1/Tnnt3/Acta1	6
GO:0031055	BP	GO:0031055	chromatin remodeling at centromere	3/404	11/29008	0.000407156	0.00483158	0.00395092	Mis18a/Hells/Nasp	3
GO:0044771	BP	GO:0044771	meiotic cell cycle phase transition	3/404	11/29008	0.000407156	0.00483158	0.00395092	Ndc80/Ttk/Ccnb2	3
GO:2000104	BP	GO:2000104	negative regulation of DNA-dependent DNA replication	3/404	11/29008	0.000407156	0.00483158	0.00395092	Fbxo5/Timeless/Brca2	3
GO:0070507	BP	GO:0070507	regulation of microtubule cytoskeleton organization	9/404	159/29008	0.000409214	0.00483809	0.00395624	Map2/Spag5/Ska3/Ska1/Tpx2/Stmn1/Tacc3/Plk1/Ccsap	9
GO:0010824	BP	GO:0010824	regulation of centrosome duplication	5/404	46/29008	0.000438142	0.00516105	0.00422034	Cep131/Gen1/Kifc1/Plk4/Stil	5
GO:0007064	BP	GO:0007064	mitotic sister chromatid cohesion	4/404	27/29008	0.000504753	0.00592392	0.00484415	Haspin/Dscc1/Sgo1/Cdca5	4
GO:0030900	BP	GO:0030900	forebrain development	15/404	400/29008	0.000548989	0.00641956	0.00524945	Col3a1/Nrp2/Kif14/Aspm/Myh10/Gli3/Ptprs/Lhx2/E2f1/Lrp8/Stil/Sema3a/Tacc3/Xrcc1/Wdr62	15
GO:0008156	BP	GO:0008156	negative regulation of DNA replication	4/404	28/29008	0.000582449	0.00676147	0.00552904	Fbxo5/Timeless/Gmnn/Brca2	4
GO:0043486	BP	GO:0043486	histone exchange	4/404	28/29008	0.000582449	0.00676147	0.00552904	Ptma/Mis18a/Anp32e/Nasp	4
GO:0010833	BP	GO:0010833	telomere maintenance via telomere lengthening	6/404	74/29008	0.00058648	0.00678369	0.00554721	Nek2/Aurkb/Rpa1/Rad51/Gar1/Pif1	6
GO:0009262	BP	GO:0009262	deoxyribonucleotide metabolic process	5/404	49/29008	0.000589059	0.00678901	0.00555156	Rrm2/Dut/Dck/Tyms/Rrm1	5
GO:0021761	BP	GO:0021761	limbic system development	7/404	103/29008	0.000607356	0.0069748	0.00570349	Nrp2/Kif14/Gli3/Ptprs/Lrp8/Sema3a/Xrcc1	7
GO:0045739	BP	GO:0045739	positive regulation of DNA repair	6/404	76/29008	0.000676195	0.00771007	0.00630474	Timeless/Brca1/Pcna/Rad51ap1/Xrcc1/Fancb	6
GO:2000573	BP	GO:2000573	positive regulation of DNA biosynthetic process	6/404	76/29008	0.000676195	0.00771007	0.00630474	Nek2/Aurkb/Dscc1/Chtf18/Pcna/Rfc5	6
GO:0000012	BP	GO:0000012	single strand break repair	3/404	13/29008	0.00069126	0.00782614	0.00639966	Smc4/Smc2/Xrcc1	3
GO:0048304	BP	GO:0048304	positive regulation of isotype switching to IgG isotypes	3/404	13/29008	0.00069126	0.00782614	0.00639966	Atad5/Msh2/Pms2	3
GO:0045814	BP	GO:0045814	negative regulation of gene expression, epigenetic	5/404	52/29008	0.000775942	0.00875393	0.00715833	Hells/Lhx2/Hat1/Ezh2/Dnmt1	5
GO:0014706	BP	GO:0014706	striated muscle tissue development	16/404	461/29008	0.00083197	0.0093531	0.00764829	Myog/Tnni1/Tnnt2/Cenpf/Vgll2/Cdk1/Myf5/Myh10/Adra1b/Sox11/Rbm24/Ccnb1/Cxadr/Actc1/Jph2/Acta1	16
GO:0070828	BP	GO:0070828	heterochromatin organization	5/404	53/29008	0.000847095	0.00948983	0.0077601	Wdhd1/Hells/Hat1/Ezh2/Dnmt1	5
GO:0048477	BP	GO:0048477	oogenesis	7/404	109/29008	0.000850795	0.00949807	0.00776684	Aspm/Fbxo5/Trip13/Ccnb1/Aurka/Ythdc1/Brca2	7
GO:2000780	BP	GO:2000780	negative regulation of double-strand break repair	4/404	31/29008	0.000866106	0.00958696	0.00783952	Parpbp/Rmi2/Polq/Fancb	4
GO:0010457	BP	GO:0010457	centriole-centriole cohesion	3/404	14/29008	0.000870726	0.00958696	0.00783952	Nek2/Sgo1/Cep250	3
GO:0051764	BP	GO:0051764	actin crosslink formation	3/404	14/29008	0.000870726	0.00958696	0.00783952	Tnnt2/Gas2l3/Dpysl3	3
GO:0070365	BP	GO:0070365	hepatocyte differentiation	3/404	14/29008	0.000870726	0.00958696	0.00783952	E2f7/Pck2/E2f8	3
GO:0098687	CC	GO:0098687	chromosomal region	64/411	301/28886	5.46607e-56	1.88579e-53	1.35213e-53	Sgo2a/Nsl1/Nek2/Nuf2/Cenpf/Dna2/Cenpw/Cdk2/Aurkb/Spag5/Birc5/Top2a/Mis18bp1/Cenph/Ccnb1/Wdhd1/Ska3/Esco2/Dscc1/Recql4/Mis18a/Cenpq/Sgo1/Ndc80/Ska1/Hells/Incenp/Fen1/Bub1b/Knstrn/Knl1/Rad51/Bub1/Smc4/Cenpe/Gar1/Orc1/Rpa2/Kif2c/Cdca8/Cenps/Cenpa/Ncapg/Kntc1/Brca2/Mad2l1/Ezh2/Ncapd2/Rad51ap1/Xrcc1/Plk1/Pold1/Mki67/Cenpn/Cdt1/Ncapd3/Pif1/Ttk/Dnmt1/Spc24/Chek1/Zwilch/Cenpi/Ercc6l	64
GO:0000775	CC	GO:0000775	chromosome, centromeric region	50/411	202/28886	2.59412e-47	4.47486e-45	3.20852e-45	Sgo2a/Nsl1/Nek2/Nuf2/Cenpf/Cenpw/Aurkb/Spag5/Birc5/Top2a/Mis18bp1/Cenph/Ccnb1/Wdhd1/Ska3/Esco2/Dscc1/Mis18a/Cenpq/Sgo1/Ndc80/Ska1/Hells/Incenp/Bub1b/Knstrn/Knl1/Bub1/Smc4/Cenpe/Kif2c/Cdca8/Cenps/Cenpa/Ncapg/Kntc1/Mad2l1/Ezh2/Ncapd2/Plk1/Mki67/Cenpn/Cdt1/Ncapd3/Ttk/Dnmt1/Spc24/Zwilch/Cenpi/Ercc6l	50
GO:0000793	CC	GO:0000793	condensed chromosome	50/411	300/28886	2.97707e-38	3.42363e-36	2.45478e-36	Sgo2a/Nsl1/Nek2/Nuf2/Cenpf/Cenpw/Cdk2/Aurkb/Spag5/Birc5/Rpa1/Top2a/Brca1/Cenph/Ccnb1/Ska3/Cenpq/Sgo1/Ndc80/Ska1/Incenp/Bub1b/Knstrn/Knl1/Rad51/Bub1/Cenpe/Smc2/Kif2c/Cenps/Cenpa/Ncapg/Kntc1/Brca2/Mad2l1/Fancd2/Ncapd2/Plk1/Mki67/Hmgb2/Cenpn/Cdt1/Ncapd3/Ttk/Topbp1/Spc24/Chek1/Zwilch/Cenpi/Ercc6l	50
GO:0000779	CC	GO:0000779	condensed chromosome, centromeric region	38/411	145/28886	3.73641e-37	3.22265e-35	2.31067e-35	Sgo2a/Nsl1/Nek2/Nuf2/Cenpf/Cenpw/Aurkb/Spag5/Birc5/Cenph/Ccnb1/Ska3/Cenpq/Sgo1/Ndc80/Ska1/Incenp/Bub1b/Knstrn/Knl1/Bub1/Cenpe/Kif2c/Cenps/Cenpa/Ncapg/Kntc1/Mad2l1/Ncapd2/Plk1/Cenpn/Cdt1/Ncapd3/Ttk/Spc24/Zwilch/Cenpi/Ercc6l	38
GO:0005819	CC	GO:0005819	spindle	50/411	332/28886	4.9307e-36	3.40218e-34	2.4394e-34	Kif14/Aspm/Nek2/Cenpf/Fbxo5/Cdk1/Myh10/Aurkb/Spag5/Cdc6/Birc5/Haspin/Kif18b/Ccnb1/Dlgap5/Haus4/Ska3/Espl1/Racgap1/Kifc1/Sgo1/Ska1/Kif20b/Kif11/Incenp/Bub1b/Knstrn/Nusap1/Tpx2/Cep250/Fam83d/Ckap2l/Aurka/Plk4/Cenpe/Ect2/Kif2c/Cdca8/Nudc/Tacc3/Kntc1/Mad2l1/Prc1/Plk1/Wdr62/Kif22/Haus8/Ccsap/Ttk/Kif23	50
GO:0000776	CC	GO:0000776	kinetochore	36/411	135/28886	1.50903e-35	8.67695e-34	6.22146e-34	Sgo2a/Nsl1/Nek2/Nuf2/Cenpf/Cenpw/Aurkb/Spag5/Birc5/Cenph/Ccnb1/Ska3/Cenpq/Sgo1/Ndc80/Ska1/Incenp/Bub1b/Knstrn/Knl1/Bub1/Cenpe/Kif2c/Cenps/Cenpa/Kntc1/Mad2l1/Plk1/Cenpn/Cdt1/Ncapd3/Ttk/Spc24/Zwilch/Cenpi/Ercc6l	36
GO:0072686	CC	GO:0072686	mitotic spindle	31/411	161/28886	4.78063e-26	2.35617e-24	1.68939e-24	Aspm/Cdk1/Aurkb/Spag5/Cdc6/Kif18b/Haus4/Ska3/Espl1/Racgap1/Kifc1/Ska1/Kif20b/Kif11/Knstrn/Nusap1/Tpx2/Fam83d/Ckap2l/Aurka/Cenpe/Ect2/Nudc/Tacc3/Mad2l1/Prc1/Plk1/Kif22/Haus8/Ccsap/Kif23	31
GO:0000228	CC	GO:0000228	nuclear chromosome	32/411	258/28886	9.76556e-21	4.2114e-19	3.01961e-19	Nek2/Prim2/Prim1/Timeless/Birc5/Fignl1/Rpa1/Top2a/Brca1/Wdhd1/Tonsl/Pola2/Incenp/Rad51/Gins1/Mcm10/Pcna/Anp32e/Mms22l/Smc2/Orc1/Rpa2/Pole/Brca2/Mcm2/Ncapd2/Plk1/Pold1/Gins3/Topbp1/Chek1/Pola1	32
GO:0005874	CC	GO:0005874	microtubule	38/411	427/28886	2.58533e-19	9.91044e-18	7.10588e-18	Map2/Kif14/Aspm/Nek2/Cdk1/Gas2l3/Aurkb/Spag5/Birc5/Dynll2/Kif18b/Haus4/Ska3/Kifc1/Tubb5/Ska1/Kif20b/Kif11/Lzts2/Incenp/Knstrn/Nusap1/Tpx2/Aurka/Cenpe/Stmn1/Kif24/Kif2c/Nudc/Kntc1/Prc1/Plk1/Kif22/Haus8/Ccsap/Kif15/Kif23/Kif4	38
GO:0005657	CC	GO:0005657	replication fork	18/411	67/28886	1.95143e-18	6.73242e-17	4.82721e-17	Prim2/Prim1/Timeless/Rpa1/Wdhd1/Tonsl/Uhrf1/Pola2/Mcm10/Pcna/Mms22l/Rpa2/Rfc5/Pold1/Pif1/Dnmt1/Chek1/Pola1	18
GO:0043596	CC	GO:0043596	nuclear replication fork	13/411	34/28886	5.74119e-16	1.80064e-14	1.29108e-14	Prim2/Prim1/Timeless/Rpa1/Wdhd1/Tonsl/Pola2/Mcm10/Pcna/Mms22l/Rpa2/Pold1/Pola1	13
GO:0000922	CC	GO:0000922	spindle pole	21/411	141/28886	1.15241e-15	3.11827e-14	2.23583e-14	Aspm/Nek2/Cenpf/Aurkb/Spag5/Cdc6/Ccnb1/Dlgap5/Kifc1/Sgo1/Kif20b/Kif11/Tpx2/Cep250/Fam83d/Aurka/Plk4/Kntc1/Mad2l1/Plk1/Wdr62	21
GO:0042555	CC	GO:0042555	MCM complex	9/411	11/28886	1.175e-15	3.11827e-14	2.23583e-14	Mcm3/Mcm6/Tonsl/Mcm4/Mcm8/Mms22l/Mcm7/Mcm2/Mcm5	9
GO:0030496	CC	GO:0030496	midbody	22/411	183/28886	2.3378e-14	5.761e-13	4.13069e-13	Kif14/Aspm/Nek2/Cenpf/Cdk1/Myh10/Aurkb/Birc5/Racgap1/Kif20b/Cep55/Lzts2/Incenp/Cenpe/Ect2/Cdca8/Nudc/Prc1/Plk1/Anln/Kif23/Kif4	22
GO:0005875	CC	GO:0005875	microtubule associated complex	20/411	154/28886	8.13805e-14	1.87175e-12	1.34206e-12	Map2/Kif14/Aurkb/Birc5/Dynll2/Kif18b/Haus4/Kifc1/Kif20b/Incenp/Acta2/Actc1/Aurka/Kif2c/Cdca8/Kif22/Haus8/Acta1/Kif15/Kif23	20
GO:0051233	CC	GO:0051233	spindle midzone	12/411	38/28886	1.13798e-13	2.45376e-12	1.75937e-12	Kif14/Aurkb/Cdc6/Kif18b/Racgap1/Kif20b/Incenp/Aurka/Cenpe/Cdca8/Prc1/Plk1	12
GO:0005876	CC	GO:0005876	spindle microtubule	14/411	68/28886	6.86012e-13	1.3922e-11	9.98222e-12	Cdk1/Aurkb/Birc5/Kif18b/Haus4/Ska3/Ska1/Kif11/Aurka/Cenpe/Kntc1/Plk1/Haus8/Ccsap	14
GO:0000940	CC	GO:0000940	outer kinetochore	8/411	14/28886	4.37449e-12	8.38444e-11	6.01173e-11	Cenpf/Ccnb1/Ska3/Ndc80/Ska1/Bub1b/Cenpe/Plk1	8
GO:0000781	CC	GO:0000781	chromosome, telomeric region	15/411	111/28886	6.03856e-11	1.09648e-09	7.86184e-10	Dna2/Cdk2/Recql4/Fen1/Rad51/Gar1/Orc1/Rpa2/Brca2/Ezh2/Rad51ap1/Xrcc1/Pold1/Pif1/Chek1	15
GO:0032993	CC	GO:0032993	protein-DNA complex	17/411	163/28886	2.08401e-10	3.59492e-09	2.57759e-09	Myog/Prim2/Prim1/Rpa1/H2bc14/H2bc12/Tonsl/Cdc45/Pola2/Gins1/Sox12/H2az1/Rpa2/Cenpa/Pold1/Gins3/Pola1	17
GO:0043601	CC	GO:0043601	nuclear replisome	8/411	21/28886	2.71652e-10	4.46285e-09	3.19991e-09	Prim2/Prim1/Rpa1/Tonsl/Pola2/Rpa2/Pold1/Pola1	8
GO:0030894	CC	GO:0030894	replisome	8/411	22/28886	4.21595e-10	6.61137e-09	4.74042e-09	Prim2/Prim1/Rpa1/Tonsl/Pola2/Rpa2/Pold1/Pola1	8
GO:0042575	CC	GO:0042575	DNA polymerase complex	7/411	18/28886	3.11929e-09	4.67893e-08	3.35484e-08	Prim2/Dna2/Prim1/Pola2/Pole/Pold1/Pola1	7
GO:0044815	CC	GO:0044815	DNA packaging complex	11/411	73/28886	6.83458e-09	9.82471e-08	7.04442e-08	Ncapg2/H2bc14/H2bc12/Ncaph/Smc4/H2az1/Smc2/Cenpa/Ncapg/Ncapd2/Ncapd3	11
GO:0000307	CC	GO:0000307	cyclin-dependent protein kinase holoenzyme complex	9/411	43/28886	8.05342e-09	1.11137e-07	7.96865e-08	Cdk1/Cdk2/Ccnb1/Ccnd3/Pcna/Ccna2/Cks1b/Ccne1/Ccnb2	9
GO:0005721	CC	GO:0005721	pericentric heterochromatin	7/411	27/28886	7.79311e-08	1.03409e-06	7.4145e-07	Esco2/Hells/Incenp/Cenpa/Ezh2/Ncapd3/Dnmt1	7
GO:0061695	CC	GO:0061695	transferase complex, transferring phosphorus-containing groups	17/411	242/28886	8.27956e-08	1.05794e-06	7.58556e-07	Prim2/Dna2/Prim1/Cdk1/Pfkl/Cdk2/Ccnb1/Ccnd3/Pola2/Pcna/Ccna2/Cks1b/Pole/Ccne1/Pold1/Ccnb2/Pola1	17
GO:0000792	CC	GO:0000792	heterochromatin	11/411	101/28886	2.13814e-07	2.6345e-06	1.88896e-06	Cbx2/Esco2/Uhrf1/Hells/Incenp/Wdr76/H2az1/Cenpa/Ezh2/Ncapd3/Dnmt1	11
GO:0005871	CC	GO:0005871	kinesin complex	8/411	52/28886	6.83232e-07	8.1281e-06	5.82793e-06	Kif14/Kif18b/Kifc1/Kif20b/Kif2c/Kif22/Kif15/Kif23	8
GO:0090734	CC	GO:0090734	site of DNA damage	10/411	92/28886	7.78597e-07	8.89455e-06	6.37748e-06	Timeless/Hrob/Rpa1/Slfn9/Esco2/Rad51/Wdr76/Rpa2/Rfwd3/Traip	10
GO:0097431	CC	GO:0097431	mitotic spindle pole	7/411	37/28886	7.99221e-07	8.89455e-06	6.37748e-06	Aspm/Aurkb/Spag5/Kif20b/Fam83d/Aurka/Plk1	7
GO:1990023	CC	GO:1990023	mitotic spindle midzone	5/411	15/28886	1.51973e-06	1.63846e-05	1.17479e-05	Aurkb/Kif18b/Kif20b/Cenpe/Prc1	5
GO:0005814	CC	GO:0005814	centriole	11/411	125/28886	1.83945e-06	1.92306e-05	1.37885e-05	Birc5/Top2a/Tedc1/Cchcr1/Wdr90/Cep250/Plk4/Stil/Kif24/Plk1/Ccsap	11
GO:1902554	CC	GO:1902554	serine/threonine protein kinase complex	9/411	84/28886	3.14443e-06	3.19067e-05	2.28774e-05	Cdk1/Cdk2/Ccnb1/Ccnd3/Pcna/Ccna2/Cks1b/Ccne1/Ccnb2	9
GO:0045171	CC	GO:0045171	intercellular bridge	9/411	85/28886	3.47308e-06	3.42347e-05	2.45466e-05	Cdc6/Cep131/Kif20b/Cep55/Tpx2/Fam83d/Cdca8/Prc1/Kif23	9
GO:0000800	CC	GO:0000800	lateral element	5/411	20/28886	7.39885e-06	6.89893e-05	4.9466e-05	Rpa1/Brca1/Incenp/Rad51/Brca2	5
GO:0031616	CC	GO:0031616	spindle pole centrosome	5/411	20/28886	7.39885e-06	6.89893e-05	4.9466e-05	Aurkb/Dlgap5/Kifc1/Cep250/Aurka	5
GO:0043292	CC	GO:0043292	contractile fiber	14/411	235/28886	7.87322e-06	7.14806e-05	5.12523e-05	Des/Csrp1/Tnni1/Tnnt2/Dek/Bin1/Acta2/Myl9/Actc1/Jph2/Npnt/Tpm2/Tnnt3/Acta1	14
GO:1902911	CC	GO:1902911	protein kinase complex	9/411	101/28886	1.44239e-05	0.000127596	9.14879e-05	Cdk1/Cdk2/Ccnb1/Ccnd3/Pcna/Ccna2/Cks1b/Ccne1/Ccnb2	9
GO:0005865	CC	GO:0005865	striated muscle thin filament	5/411	23/28886	1.55031e-05	0.000130453	9.35359e-05	Tnni1/Tnnt2/Tpm2/Tnnt3/Acta1	5
GO:0045120	CC	GO:0045120	pronucleus	5/411	23/28886	1.55031e-05	0.000130453	9.35359e-05	Cenpf/Aurka/Ccna2/Ezh2/Ncapd2	5
GO:0036379	CC	GO:0036379	myofilament	5/411	27/28886	3.54925e-05	0.000289732	0.000207741	Tnni1/Tnnt2/Tpm2/Tnnt3/Acta1	5
GO:0005652	CC	GO:0005652	nuclear lamina	4/411	14/28886	3.61115e-05	0.000289732	0.000207741	Lbr/Lmnb2/Lmnb1/Pcna	4
GO:0034399	CC	GO:0034399	nuclear periphery	9/411	115/28886	4.07899e-05	0.00031983	0.000229321	Map2/Lbr/Cenpf/Lmnb2/Uhrf1/Lmnb1/Pcna/Anp32a/Pola1	9
GO:0072687	CC	GO:0072687	meiotic spindle	4/411	16/28886	6.41923e-05	0.000492141	0.00035287	Aspm/Fbxo5/Incenp/Aurka	4
GO:0043073	CC	GO:0043073	germ cell nucleus	5/411	31/28886	7.12865e-05	0.000534649	0.000383348	Rpa1/Trip13/Aurka/Ncapd3/Topbp1	5
GO:0010369	CC	GO:0010369	chromocenter	4/411	17/28886	8.30025e-05	0.000609274	0.000436855	Aurkb/Esco2/Incenp/Cdca8	4
GO:0000794	CC	GO:0000794	condensed nuclear chromosome	9/411	129/28886	9.98569e-05	0.000717722	0.000514614	Nek2/Rpa1/Brca1/Incenp/Rad51/Brca2/Plk1/Topbp1/Chek1	9
GO:1990752	CC	GO:1990752	microtubule end	5/411	34/28886	0.000112723	0.000793659	0.000569061	Aspm/Spag5/Kif18b/Knstrn/Kif2c	5
GO:0030017	CC	GO:0030017	sarcomere	11/411	197/28886	0.000130537	0.000900705	0.000645815	Des/Csrp1/Tnni1/Tnnt2/Bin1/Myl9/Actc1/Jph2/Tpm2/Tnnt3/Acta1	11
GO:0034451	CC	GO:0034451	centriolar satellite	8/411	109/28886	0.000170546	0.0011537	0.000827211	Spag5/Cep131/Dlgap5/Cep55/Knstrn/Tacc3/Plk1/Wdr62	8
GO:0030016	CC	GO:0030016	myofibril	11/411	222/28886	0.000366427	0.0024311	0.00174312	Des/Csrp1/Tnni1/Tnnt2/Bin1/Myl9/Actc1/Jph2/Tpm2/Tnnt3/Acta1	11
GO:0035371	CC	GO:0035371	microtubule plus-end	4/411	25/28886	0.000403193	0.00262456	0.00188183	Spag5/Kif18b/Knstrn/Kif2c	4
GO:0005818	CC	GO:0005818	aster	3/411	12/28886	0.000571793	0.00365312	0.00261933	Kif18b/Tpx2/Ccsap	3
GO:0005662	CC	GO:0005662	DNA replication factor A complex	3/411	13/28886	0.000735505	0.00453124	0.00324894	Rpa1/Tonsl/Rpa2	3
GO:0070938	CC	GO:0070938	contractile ring	3/411	13/28886	0.000735505	0.00453124	0.00324894	Kif20b/Prc1/Anln	3
GO:0005869	CC	GO:0005869	dynactin complex	3/411	16/28886	0.0013952	0.00835285	0.00598908	Acta2/Actc1/Acta1	3
GO:0032153	CC	GO:0032153	cell division site	5/411	58/28886	0.00140425	0.00835285	0.00598908	Myh10/Racgap1/Mastl/Ect2/Anln	5
GO:1990391	CC	GO:1990391	DNA repair complex	4/411	35/28886	0.00149199	0.00872436	0.00625545	Msh2/Pms2/Xrcc1/Pold1	4
GO:0140097	MF	GO:0140097	catalytic activity, acting on DNA	35/398	223/28438	2.39495e-26	1.24059e-23	1.03613e-23	Exo1/Mcm3/Mcm6/Dna2/Atad5/Brip1/Top2a/Gen1/Dscc1/Recql4/Polq/Mcm4/Msh2/Chtf18/Hells/Pola2/Fen1/Rad51/Mcm8/Pcna/Zgrf1/Pole/Ung/Rfc5/Mcm7/Mcm2/Lig1/Xrcc1/Pold1/Mcm5/Neil3/Pif1/Dnmt1/Pola1/Ercc6l	35
GO:0017116	MF	GO:0017116	single-stranded DNA helicase activity	14/398	23/28438	6.41883e-21	1.63083e-18	1.36206e-18	Mcm3/Mcm6/Dna2/Dscc1/Polq/Mcm4/Chtf18/Rad51/Mcm8/Rfc5/Mcm7/Mcm2/Mcm5/Pif1	14
GO:0003697	MF	GO:0003697	single-stranded DNA binding	24/398	123/28438	9.44495e-21	1.63083e-18	1.36206e-18	Mcm3/Mcm6/Hrob/Purb/Rpa1/Recql4/Mcm4/Cdc45/Msh2/Fam111a/Rad51/Mcm8/Mcm10/Smc4/Smc2/Rpa2/Pms2/Brca2/Mcm7/Mcm2/Rad51ap1/Mcm5/Neil3/Pola1	24
GO:0008094	MF	GO:0008094	ATP-dependent activity, acting on DNA	21/398	110/28438	4.14786e-18	5.37148e-16	4.48624e-16	Mcm3/Mcm6/Dna2/Atad5/Brip1/Top2a/Dscc1/Recql4/Polq/Mcm4/Msh2/Chtf18/Hells/Rad51/Mcm8/Rfc5/Mcm7/Mcm2/Mcm5/Pif1/Ercc6l	21
GO:0008017	MF	GO:0008017	microtubule binding	29/398	266/28438	1.47713e-17	1.5303e-15	1.2781e-15	Map2/Kif14/Gas2l3/Spag5/Birc5/Kif18b/Dlgap5/Haus4/Racgap1/Kifc1/Ska1/Kif20b/Kif11/Knstrn/Nusap1/Tpx2/Fam83d/Cenpe/Kif24/Kif2c/Prc1/Plk1/Kif22/Haus8/Ccsap/Kif15/Spc24/Kif23/Kif4	29
GO:0003678	MF	GO:0003678	DNA helicase activity	17/398	69/28438	6.62528e-17	5.71983e-15	4.77718e-15	Mcm3/Mcm6/Dna2/Brip1/Dscc1/Recql4/Polq/Mcm4/Chtf18/Rad51/Mcm8/Rfc5/Mcm7/Mcm2/Mcm5/Pif1/Ercc6l	17
GO:0015631	MF	GO:0015631	tubulin binding	31/398	380/28438	4.05434e-15	3.00021e-13	2.50577e-13	Map2/Kif14/Gas2l3/Spag5/Birc5/Kif18b/Dlgap5/Haus4/Racgap1/Kifc1/Ska1/Kif20b/Kif11/Knstrn/Nusap1/Tpx2/Fam83d/Cenpe/Stmn1/Kif24/Kif2c/Brca2/Prc1/Plk1/Kif22/Haus8/Ccsap/Kif15/Spc24/Kif23/Kif4	31
GO:0004386	MF	GO:0004386	helicase activity	19/398	151/28438	4.55073e-13	2.9466e-11	2.46099e-11	Mcm3/Mcm6/Dna2/Brip1/Dscc1/Recql4/Polq/Mcm4/Chtf18/Hells/Rad51/Mcm8/Zgrf1/Rfc5/Mcm7/Mcm2/Mcm5/Pif1/Ercc6l	19
GO:0003774	MF	GO:0003774	cytoskeletal motor activity	15/398	107/28438	2.78787e-11	1.60457e-09	1.34013e-09	Tnnt2/Kif14/Myh10/Kif18b/Kifc1/Kif20b/Kif11/Actc1/Cenpe/Kif24/Kif2c/Kif22/Kif15/Kif23/Kif4	15
GO:0016887	MF	GO:0016887	ATP hydrolysis activity	20/398	223/28438	6.11308e-11	3.16657e-09	2.64471e-09	Kif14/Atad5/Fignl1/Kif18b/Trip13/Atad2/Msh2/Chtf18/Kifc1/Kif20b/Bbs12/Smc4/Smc2/Orc1/Kif2c/Pms2/Rfc5/Kif22/Kif15/Kif23	20
GO:0003777	MF	GO:0003777	microtubule motor activity	12/398	65/28438	9.88933e-11	4.65697e-09	3.88949e-09	Kif14/Kif18b/Kifc1/Kif20b/Kif11/Cenpe/Kif24/Kif2c/Kif22/Kif15/Kif23/Kif4	12
GO:0003688	MF	GO:0003688	DNA replication origin binding	7/398	15/28438	5.83013e-10	2.51667e-08	2.10192e-08	Cdc6/Cdc45/Mcm10/Orc1/Mcm2/Mcm5/Pola1	7
GO:0003684	MF	GO:0003684	damaged DNA binding	11/398	61/28438	7.85401e-10	3.12952e-08	2.61376e-08	Rpa1/Brca1/Recql4/Msh2/Pcna/Rpa2/Ung/Xrcc1/Pold1/Hmgb2/Neil3	11
GO:0035173	MF	GO:0035173	histone kinase activity	6/398	16/28438	5.14797e-08	1.90475e-06	1.59084e-06	Cdk1/Cdk2/Aurkb/Haspin/Aurka/Chek1	6
GO:0004519	MF	GO:0004519	endonuclease activity	12/398	131/28438	3.40003e-07	1.17414e-05	9.80641e-06	Exo1/Dna2/Slfn9/Gen1/Rnaset2b/Fen1/Zgrf1/Pms2/Tsen34/Xrcc1/Ankle1/Neil3	12
GO:0004674	MF	GO:0004674	protein serine/threonine kinase activity	21/398	441/28438	1.33286e-06	4.31513e-05	3.60398e-05	Nek2/Pask/Cdk1/Cdk2/Aurkb/Haspin/Pbk/Pkmyt1/Ccnd3/Bub1b/Mastl/Bub1/Aurka/Plk4/Melk/Cit/Dbf4/Plk1/Ttk/Dclk3/Chek1	21
GO:0004518	MF	GO:0004518	nuclease activity	14/398	208/28438	1.57393e-06	4.69468e-05	3.92098e-05	Exo1/Dna2/Slfn9/Gen1/Rnaset2b/Fen1/Zgrf1/Pole/Pms2/Tsen34/Xrcc1/Pold1/Ankle1/Neil3	14
GO:0004536	MF	GO:0004536	deoxyribonuclease activity	8/398	59/28438	1.63136e-06	4.69468e-05	3.92098e-05	Exo1/Dna2/Gen1/Fen1/Zgrf1/Pole/Xrcc1/Pold1	8
GO:0008574	MF	GO:0008574	plus-end-directed microtubule motor activity	5/398	17/28438	2.82095e-06	7.30626e-05	6.10216e-05	Kif14/Kif18b/Kif20b/Kif11/Cenpe	5
GO:0016888	MF	GO:0016888	endodeoxyribonuclease activity, producing 5'-phosphomonoesters	5/398	17/28438	2.82095e-06	7.30626e-05	6.10216e-05	Exo1/Dna2/Gen1/Fen1/Zgrf1	5
GO:0042393	MF	GO:0042393	histone binding	16/398	287/28438	3.39432e-06	8.37265e-05	6.9928e-05	Ptma/Cbx2/Ncapg2/Dek/Atad2/Tonsl/Uhrf1/Hat1/Anp32e/Cks1b/Nasp/Mcm2/Ncapd2/Asf1b/Ncapd3/Anp32a	16
GO:0016538	MF	GO:0016538	cyclin-dependent protein serine/threonine kinase regulator activity	7/398	47/28438	3.87383e-06	9.12111e-05	7.61791e-05	Ccnb1/Ccnd3/Ccna2/Cks1b/Cdkn2c/Ccne1/Ccnb2	7
GO:0019887	MF	GO:0019887	protein kinase regulator activity	13/398	197/28438	4.60596e-06	0.000103734	8.66385e-05	Ncapg2/Prkar2b/Ccnb1/Ccnd3/Incenp/Tpx2/Ccna2/Cks1b/Cdkn2c/Cit/Dbf4/Ccne1/Ccnb2	13
GO:0000287	MF	GO:0000287	magnesium ion binding	13/398	209/28438	8.75086e-06	0.000188873	0.000157746	Prim1/Cdk2/Eno3/Top2a/Gen1/Msh2/Fen1/Dut/Dck/Wee1/Plk1/Idh2/Pif1	13
GO:0003887	MF	GO:0003887	DNA-directed DNA polymerase activity	5/398	22/28438	1.13322e-05	0.00022363	0.000186774	Polq/Pola2/Pole/Pold1/Pola1	5
GO:0032404	MF	GO:0032404	mismatch repair complex binding	4/398	11/28438	1.1538e-05	0.00022363	0.000186774	Msh2/Mcm8/Pcna/Pms2	4
GO:0000217	MF	GO:0000217	DNA secondary structure binding	6/398	37/28438	1.16564e-05	0.00022363	0.000186774	Gen1/Recql4/Msh2/Clspn/Rad51ap1/Neil3	6
GO:0004520	MF	GO:0004520	endodeoxyribonuclease activity	6/398	40/28438	1.8576e-05	0.000331807	0.000277124	Exo1/Dna2/Gen1/Fen1/Zgrf1/Xrcc1	6
GO:0051539	MF	GO:0051539	4 iron, 4 sulfur cluster binding	6/398	40/28438	1.8576e-05	0.000331807	0.000277124	Prim2/Dna2/Brip1/Pole/Pold1/Pola1	6
GO:0019207	MF	GO:0019207	kinase regulator activity	13/398	229/28438	2.3111e-05	0.00039905	0.000333285	Ncapg2/Prkar2b/Ccnb1/Ccnd3/Incenp/Tpx2/Ccna2/Cks1b/Cdkn2c/Cit/Dbf4/Ccne1/Ccnb2	13
GO:0051536	MF	GO:0051536	iron-sulfur cluster binding	7/398	67/28438	4.2135e-05	0.000682061	0.000569655	Prim2/Dna2/Brip1/Pole/Pold1/Kif4/Pola1	7
GO:0051540	MF	GO:0051540	metal cluster binding	7/398	67/28438	4.2135e-05	0.000682061	0.000569655	Prim2/Dna2/Brip1/Pole/Pold1/Kif4/Pola1	7
GO:0106310	MF	GO:0106310	protein serine kinase activity	13/398	246/28438	4.85558e-05	0.00076218	0.000636569	Nek2/Pask/Aurkb/Haspin/Pkmyt1/Bub1b/Mastl/Bub1/Aurka/Melk/Cit/Dclk3/Chek1	13
GO:0034061	MF	GO:0034061	DNA polymerase activity	5/398	30/28438	5.59291e-05	0.000852097	0.000711668	Polq/Pola2/Pole/Pold1/Pola1	5
GO:0043138	MF	GO:0043138	3'-5' DNA helicase activity	4/398	16/28438	6.01978e-05	0.000890927	0.000744099	Mcm6/Recql4/Mcm2/Mcm5	4
GO:0008022	MF	GO:0008022	protein C-terminus binding	12/398	232/28438	0.000115315	0.00165926	0.00138581	Cenpf/Vgll2/Top2a/Fbln1/Msh2/Rad51/Cep250/Pcna/Brca2/Mad2l1/Mki67/Siah1b	12
GO:0046982	MF	GO:0046982	protein heterodimerization activity	14/398	307/28438	0.000122171	0.00171039	0.00142852	Bok/Bard1/Cenpw/Birc5/Adra1b/Top2a/H2bc14/H2bc12/Aurka/H2az1/Tpm2/Cenps/Cenpa/Tenm3	14
GO:0070182	MF	GO:0070182	DNA polymerase binding	4/398	22/28438	0.000226394	0.00308611	0.00257751	Rad51/Pcna/Fancd2/Cdt1	4
GO:0016893	MF	GO:0016893	endonuclease activity, active with either ribo- or deoxyribonucleic acids and producing 5'-phosphomonoesters	5/398	42/28438	0.000290919	0.00386401	0.0032272	Exo1/Dna2/Gen1/Fen1/Zgrf1	5
GO:0043139	MF	GO:0043139	5'-3' DNA helicase activity	3/398	10/28438	0.000303476	0.00393002	0.00328233	Dna2/Brip1/Pif1	3
GO:0030983	MF	GO:0030983	mismatched DNA binding	3/398	11/28438	0.000412953	0.00509309	0.00425373	Msh2/Pcna/Pms2	3
GO:0032356	MF	GO:0032356	oxidized DNA binding	3/398	11/28438	0.000412953	0.00509309	0.00425373	Recql4/Msh2/Xrcc1	3
GO:0019104	MF	GO:0019104	DNA N-glycosylase activity	3/398	12/28438	0.000544899	0.00641494	0.00535774	Pcna/Ung/Neil3	3
GO:0048407	MF	GO:0048407	platelet-derived growth factor binding	3/398	12/28438	0.000544899	0.00641494	0.00535774	Col3a1/Col5a1/Pdap1	3
GO:0000900	MF	GO:0000900	translation repressor activity, mRNA regulatory element binding	3/398	13/28438	0.000701033	0.00806967	0.00673976	Purb/Dhfr/Tyms	3
GO:0044389	MF	GO:0044389	ubiquitin-like protein ligase binding	13/398	330/28438	0.000842517	0.00948747	0.0079239	Bok/Ube2t/Ptprn/Brca1/Prkar2b/Ccnb1/Tubb5/Ube2c/Aurka/Rpa2/Uchl1/Tpi1/Mfhas1	13

## Sheet: ASC24_up_GO
Supplementary Table S1. Transcriptomic changes upon YTHDC1 iKO in ASC.
GO analysis of up-regulated genes in ASC 24h upon YTHDC1 iKO.
	ONTOLOGY	ID	Description	GeneRatio	BgRatio	pvalue	p.adjust	qvalue	geneID	Count
GO:0009411	BP	GO:0009411	response to UV	7/106	149/29008	1.30464e-06	0.00284126	0.00213552	Egfr/Mapk13/Cdkn1a/Pmaip1/Mmp9/Trp53inp1/Mmp2	7
GO:0006979	BP	GO:0006979	response to oxidative stress	10/106	407/29008	2.54707e-06	0.00284126	0.00213552	Egfr/Dapk1/Gpx8/Mapk13/Mmp9/Txnip/Trp53inp1/Sod3/Cln8/Mmp2	10
GO:0150079	BP	GO:0150079	negative regulation of neuroinflammatory response	3/106	13/29008	1.32072e-05	0.00660079	0.00496122	Nr1d1/Tnfrsf1b/Cx3cl1	3
GO:2001233	BP	GO:2001233	regulation of apoptotic signaling pathway	9/106	402/29008	1.73258e-05	0.00660079	0.00496122	Mdm2/Dapk1/Gdnf/Pmaip1/Mmp9/Traf1/Trp53inp1/Cx3cl1/Nrg1	9
GO:0034644	BP	GO:0034644	cellular response to UV	5/106	89/29008	1.92698e-05	0.00660079	0.00496122	Mapk13/Cdkn1a/Mmp9/Trp53inp1/Mmp2	5
GO:0070141	BP	GO:0070141	response to UV-A	3/106	15/29008	2.08999e-05	0.00660079	0.00496122	Egfr/Mmp9/Mmp2	3
GO:0070372	BP	GO:0070372	regulation of ERK1 and ERK2 cascade	8/106	326/29008	2.70995e-05	0.00660079	0.00496122	Lif/Egfr/Ccl2/Tnip1/Dusp15/Ptpn22/Cx3cl1/Nrg1	8
GO:0051403	BP	GO:0051403	stress-activated MAPK cascade	7/106	238/29008	2.80203e-05	0.00660079	0.00496122	Egfr/Map2k6/Mapk13/Traf1/Dusp15/Ptpn22/Eda2r	7
GO:0097191	BP	GO:0097191	extrinsic apoptotic signaling pathway	7/106	238/29008	2.80203e-05	0.00660079	0.00496122	Dapk1/Gdnf/Pmaip1/Traf1/Tnfrsf1b/Cx3cl1/Nrg1	7
GO:2000696	BP	GO:2000696	regulation of epithelial cell differentiation involved in kidney development	3/106	17/29008	3.10692e-05	0.00660079	0.00496122	Lif/Gdnf/Mmp9	3
GO:0031098	BP	GO:0031098	stress-activated protein kinase signaling cascade	7/106	248/29008	3.64117e-05	0.00660079	0.00496122	Egfr/Map2k6/Mapk13/Traf1/Dusp15/Ptpn22/Eda2r	7
GO:2001236	BP	GO:2001236	regulation of extrinsic apoptotic signaling pathway	6/106	168/29008	3.64796e-05	0.00660079	0.00496122	Dapk1/Gdnf/Pmaip1/Traf1/Cx3cl1/Nrg1	6
GO:0071478	BP	GO:0071478	cellular response to radiation	6/106	172/29008	4.16077e-05	0.00660079	0.00496122	Mdm2/Mapk13/Cdkn1a/Mmp9/Trp53inp1/Mmp2	6
GO:0070371	BP	GO:0070371	ERK1 and ERK2 cascade	8/106	349/29008	4.3891e-05	0.00660079	0.00496122	Lif/Egfr/Ccl2/Tnip1/Dusp15/Ptpn22/Cx3cl1/Nrg1	8
GO:0071356	BP	GO:0071356	cellular response to tumor necrosis factor	6/106	174/29008	4.43801e-05	0.00660079	0.00496122	Ccl2/Nr1d1/Traf1/Cx3cl1/Birc3/Eda2r	6
GO:0048145	BP	GO:0048145	regulation of fibroblast proliferation	5/106	108/29008	4.89834e-05	0.00683013	0.00513359	Egfr/Cdkn1a/Pmaip1/Mmp9/Trp53inp1	5
GO:0048144	BP	GO:0048144	fibroblast proliferation	5/106	111/29008	5.5834e-05	0.00692031	0.00520138	Egfr/Cdkn1a/Pmaip1/Mmp9/Trp53inp1	5
GO:0071482	BP	GO:0071482	cellular response to light stimulus	5/106	111/29008	5.5834e-05	0.00692031	0.00520138	Mapk13/Cdkn1a/Mmp9/Trp53inp1/Mmp2	5
GO:0050673	BP	GO:0050673	epithelial cell proliferation	9/106	471/29008	5.93464e-05	0.00696851	0.0052376	Kdm5b/Cd34/Egfr/Ccl2/Nr1d1/Fst/Mcc/Zfas1/Sulf2	9
GO:0034599	BP	GO:0034599	cellular response to oxidative stress	7/106	271/29008	6.37259e-05	0.00710862	0.00534291	Egfr/Dapk1/Mapk13/Mmp9/Trp53inp1/Sod3/Mmp2	7
GO:0043122	BP	GO:0043122	regulation of I-kappaB kinase/NF-kappaB signaling	6/106	190/29008	7.23091e-05	0.00759355	0.00570739	Tnip1/Nr1d1/Traf1/S100a13/Cx3cl1/Eda2r	6
GO:1904705	BP	GO:1904705	regulation of vascular associated smooth muscle cell proliferation	4/106	61/29008	7.48803e-05	0.00759355	0.00570739	Mdm2/Cdkn1a/Mmp9/Mmp2	4
GO:1990874	BP	GO:1990874	vascular associated smooth muscle cell proliferation	4/106	62/29008	7.98205e-05	0.00774258	0.0058194	Mdm2/Cdkn1a/Mmp9/Mmp2	4
GO:0034612	BP	GO:0034612	response to tumor necrosis factor	6/106	196/29008	8.58255e-05	0.0079782	0.00599649	Ccl2/Nr1d1/Traf1/Cx3cl1/Birc3/Eda2r	6
GO:2000045	BP	GO:2000045	regulation of G1/S transition of mitotic cell cycle	5/106	128/29008	0.000109736	0.00979282	0.00736038	Mdm2/Egfr/Ccl2/Cdkn1a/Ak1	5
GO:0031625	MF	GO:0031625	ubiquitin protein ligase binding	8/104	313/28438	2.03076e-05	0.00374467	0.0030537	Mdm2/Egfr/Axin2/Cdkn1a/Traf1/Txnip/Ptpn22/Tnfrsf1b	8
GO:0044389	MF	GO:0044389	ubiquitin-like protein ligase binding	8/104	330/28438	2.96022e-05	0.00374467	0.0030537	Mdm2/Egfr/Axin2/Cdkn1a/Traf1/Txnip/Ptpn22/Tnfrsf1b	8

## Sheet: ASC48 DEG
Supplementary Table S1. Transcriptomic changes upon YTHDC1 iKO in ASC.
GO analysis of up-regulated genes in ASC 24h upon YTHDC1 iKO.
test_id	gene_id	gene	locus	sample_1	sample_2	status	value_1	value_2	log2(fold_change)	test_stat	p_value	q_value	significant
XLOC_000067	XLOC_000067	Arhgef4	chr1:34735026-34869583	KO	WT	OK	2.6031	0.990158	-1.3945	-3.01602	0.00025	0.00166535	yes
XLOC_000112	XLOC_000112	Col3a1	chr1:45368382-45406551	KO	WT	OK	38.3023	86.6535	1.17783	4.96788	5e-05	0.000399594	yes
XLOC_000118	XLOC_000118	Cavin2	chr1:51275229-51390623	KO	WT	OK	18.4768	42.0159	1.18522	4.82093	5e-05	0.000399594	yes
XLOC_000131	XLOC_000131	Mars2	chr1:55294020-55296902	KO	WT	OK	1.39133	10.9542	2.97695	7.84915	5e-05	0.000399594	yes
XLOC_000132	XLOC_000132	Plcl1	chr1:55462789-55811129	KO	WT	OK	0.702186	2.12298	1.59616	4.14842	5e-05	0.000399594	yes
XLOC_000140	XLOC_000140	Aox1	chr1:58086812-58163254	KO	WT	OK	4.64651	2.07765	-1.16119	-3.68383	5e-05	0.000399594	yes
XLOC_000147	XLOC_000147	Gm20257	chr1:58709484-58712675	KO	WT	OK	10.4181	2.75673	-1.91807	-4.17289	5e-05	0.000399594	yes
XLOC_000196	XLOC_000196	Igfbp2	chr1:72871053-72899045	KO	WT	OK	2.62699	6.72039	1.35513	3.08492	5e-05	0.000399594	yes
XLOC_000210	XLOC_000210	Plcd4	chr1:74455957-74612551	KO	WT	OK	1.36232	0.0843445	-4.01362	-0.765477	0.04515	0.115532	no
XLOC_000214	XLOC_000214	Cyp27a1	chr1:74760108-74784471	KO	WT	OK	2.27952	0.485948	-2.22985	-3.6298	0.0002	0.00138545	yes
XLOC_000250	XLOC_000250	Fbxo36	chr1:84836415-84897061	KO	WT	OK	7.68121	1.268	-2.59877	-4.49026	5e-05	0.000399594	yes
XLOC_000272	XLOC_000272	Chrnd	chr1:89087171-89096645	KO	WT	OK	6.97674	22.5017	1.68941	6.32387	5e-05	0.000399594	yes
XLOC_000273	XLOC_000273	Chrng	chr1:89102385-89108410	KO	WT	OK	4.00961	16.1584	2.01075	6.16824	5e-05	0.000399594	yes
XLOC_000292	XLOC_000292	Agap1	chr1:91351385-91791857	KO	WT	OK	10.3446	5.15119	-1.00591	-4.05539	5e-05	0.000399594	yes
XLOC_000304	XLOC_000304	Erfe	chr1:93263006-93295400	KO	WT	OK	4.04496	8.82993	1.12628	1.67425	0.0218	0.0650638	no
XLOC_000315	XLOC_000315	Dusp28	chr1:94803565-94807341	KO	WT	OK	5.67777	2.40703	-1.23807	-2.84368	0.00045	0.0027268	yes
XLOC_000360	XLOC_000360	Serpinb8	chr1:109486582-109505555	KO	WT	OK	0.595447	1.57157	1.40016	1.78369	0.016	0.0510305	no
XLOC_000387	XLOC_000387	Cd55os	chr1:132285104-132334491	KO	WT	OK	1.33708	0.339065	-1.97945	-2.98419	0.00045	0.0027268	yes
XLOC_000396	XLOC_000396	Fam72a	chr1:133424479-133435612	KO	WT	OK	1.80333	4.76038	1.40041	2.98373	0.0002	0.00138545	yes
XLOC_000401	XLOC_000401	Pm20d1	chr1:133693971-133718049	KO	WT	OK	2.95295	1.18069	-1.32252	-3.3147	5e-05	0.000399594	yes
XLOC_000413	XLOC_000413	Tmem81	chr1:134402806-134405216	KO	WT	OK	0.435351	1.56963	1.85017	2.56359	0.0025	0.0115004	yes
XLOC_000418	XLOC_000418	Plekha6	chr1:135142673-135200012	KO	WT	OK	1.39952	0.370605	-1.91698	-4.492	5e-05	0.000399594	yes
XLOC_000426	XLOC_000426	Mybph	chr1:136090024-136132034	KO	WT	OK	0.120262	1.69986	3.82117	3.15883	0.01205	0.040873	yes
XLOC_000427	XLOC_000427	Myog	chr1:136186580-136189125	KO	WT	OK	1.7992	17.7679	3.30385	8.07207	5e-05	0.000399594	yes
XLOC_000436	XLOC_000436	Ptpn7	chr1:137029276-137041903	KO	WT	OK	1.14883	0.220146	-2.38364	-3.65705	5e-05	0.000399594	yes
XLOC_000442	XLOC_000442	Tnni1	chr1:137695997-137707566	KO	WT	OK	1.04742	5.60152	2.41898	3.97862	5e-05	0.000399594	yes
XLOC_000450	XLOC_000450	Kif14	chr1:138364424-138427396	KO	WT	OK	1.51916	4.25434	1.48566	5.08699	5e-05	0.000399594	yes
XLOC_000462	XLOC_000462	Aspm	chr1:141351349-141390665	KO	WT	OK	4.63754	12.628	1.44519	5.7401	5e-05	0.000399594	yes
XLOC_000500	XLOC_000500	Cryzl2	chr1:159388698-159419193	KO	WT	OK	2.36472	0.365878	-2.69223	-3.08279	0.00095	0.00508332	yes
XLOC_000520	XLOC_000520	Dnm3os	chr1:163917432-164408165	KO	WT	OK	3.84422	1.72777	-1.15378	-3.54902	5e-05	0.000399594	yes
XLOC_000535	XLOC_000535	Dpt	chr1:166726793-166754404	KO	WT	OK	1.14773	0.369873	-1.63368	-2.10146	0.0109	0.0377867	yes
XLOC_000545	XLOC_000545	Fam78b	chr1:168931547-169021433	KO	WT	OK	4.54684	1.88692	-1.26883	-4.07863	5e-05	0.000399594	yes
XLOC_000564	XLOC_000564	Adamts4	chr1:173180259-173192398	KO	WT	OK	1.86723	9.14428	2.29197	7.98526	5e-05	0.000399594	yes
XLOC_000568	XLOC_000568	Nectin4	chr1:173300303-173318418	KO	WT	OK	1.09952	0.28214	-1.96239	-3.31599	0.0003	0.00192981	yes
XLOC_000587	XLOC_000587	Igsf9	chr1:174412343-174429008	KO	WT	OK	0.519913	2.5744	2.3079	5.24012	5e-05	0.000399594	yes
XLOC_000588	XLOC_000588	Tagln2	chr1:174430376-174437506	KO	WT	OK	301.949	631.476	1.06442	4.51201	5e-05	0.000399594	yes
XLOC_000607	XLOC_000607	Spta1	chr1:176102906-176178580	KO	WT	OK	0.911398	5.22129	2.51825	7.95783	5e-05	0.000399594	yes
XLOC_000650	XLOC_000650	Dusp10	chr1:185858259-185899515	KO	WT	OK	44.1346	16.3393	-1.43357	-5.77922	5e-05	0.000399594	yes
XLOC_000665	XLOC_000665	Ptpn14	chr1:191552146-191700572	KO	WT	OK	42.9044	19.5879	-1.13117	-4.82553	5e-05	0.000399594	yes
XLOC_000673	XLOC_000673	D730003I15Rik	chr1:193048332-193049566	KO	WT	OK	10.757	1.42964	-2.91156	-3.82171	0.0006	0.00349059	yes
XLOC_000677	XLOC_000677	Nek2	chr1:193645351-193656928	KO	WT	OK	11.6865	38.4968	1.7199	6.79058	5e-05	0.000399594	yes
XLOC_000678	XLOC_000678	Slc30a1	chr1:193717950-193737126	KO	WT	OK	15.7449	7.73607	-1.02521	-3.98861	5e-05	0.000399594	yes
XLOC_000689	XLOC_000689	Cd34	chr1:196765014-196803153	KO	WT	OK	112.968	17.0134	-2.73117	-11.0626	5e-05	0.000399594	yes
XLOC_000743	XLOC_000743	Col19a1	chr1:24264521-24594276	KO	WT	OK	5.36662	2.64102	-1.02292	-3.9247	5e-05	0.000399594	yes
XLOC_000760	XLOC_000760	Bend6	chr1:33908896-33964612	KO	WT	OK	1.80906	3.96356	1.13156	2.77334	0.0004	0.00247463	yes
XLOC_000772	XLOC_000772	Ankrd23	chr1:36587037-36593401	KO	WT	OK	1.51845	0.699096	-1.11904	-2.04626	0.0055	0.021874	yes
XLOC_000813	XLOC_000813	Slc40a1	chr1:45964914-45982439	KO	WT	OK	2.43378	1.16901	-1.05791	-2.53647	0.00095	0.00508332	yes
XLOC_000824	XLOC_000824	Mfsd6	chr1:52713129-52784202	KO	WT	OK	2.06125	4.41134	1.0977	3.549	5e-05	0.000399594	yes
XLOC_000843	XLOC_000843	4930558J18Rik	chr1:57416065-57434388	KO	WT	OK	0.176765	1.00237	2.50351	2.54384	0.00745	0.0278202	yes
XLOC_000879	XLOC_000879	D630023F18Rik	chr1:65151858-65169788	KO	WT	OK	1.60647	0.123714	-3.69881	-1.88483	0.00735	0.0275514	yes
XLOC_000895	XLOC_000895	Igfbp5	chr1:72904638-72921439	KO	WT	OK	2.35414	17.8329	2.92127	10.6343	5e-05	0.000399594	yes
XLOC_000922	XLOC_000922	Ptprn	chr1:75243615-75260783	KO	WT	OK	3.33954	14.8546	2.15319	7.63689	5e-05	0.000399594	yes
XLOC_000927	XLOC_000927	Obsl1	chr1:75482399-75503027	KO	WT	OK	6.67273	21.5238	1.68959	6.43483	5e-05	0.000399594	yes
XLOC_000934	XLOC_000934	Ap1s3	chr1:79603450-79668547	KO	WT	OK	0.37566	1.28238	1.77132	2.81933	0.002	0.00951935	yes
XLOC_000936	XLOC_000936	Serpine2	chr1:79790895-79855240	KO	WT	OK	234.397	85.9427	-1.44751	-6.16644	5e-05	0.000399594	yes
XLOC_000945	XLOC_000945	Pid1	chr1:84032867-84281220	KO	WT	OK	3.1159	0.589124	-2.40301	-4.73161	5e-05	0.000399594	yes
XLOC_000947	XLOC_000947	Dner	chr1:84366413-84692796	KO	WT	OK	0.256156	1.19856	2.2262	3.5455	0.00015	0.00107374	yes
XLOC_000987	XLOC_000987	Per2	chr1:93312558-93355905	KO	WT	OK	5.03732	2.0688	-1.28386	-4.42591	5e-05	0.000399594	yes
XLOC_001032	XLOC_001032	Dsel	chr1:113755278-113761495	KO	WT	OK	1.90697	5.46202	1.51815	4.96849	5e-05	0.000399594	yes
XLOC_001036	XLOC_001036	Gli2	chr1:120730637-120950196	KO	WT	OK	0.91814	2.02447	1.14076	3.38563	5e-05	0.000399594	yes
XLOC_001064	XLOC_001064	Cd55	chr1:132335602-132359321	KO	WT	OK	25.368	3.55042	-2.83695	-9.36111	5e-05	0.000399594	yes
XLOC_001074	XLOC_001074	Rassf5	chr1:133072986-133141755	KO	WT	OK	5.54799	2.15275	-1.36579	-4.10731	5e-05	0.000399594	yes
XLOC_001075	XLOC_001075	Ikbke	chr1:133151178-133176140	KO	WT	OK	1.1615	0.536039	-1.11558	-2.149	0.00425	0.0177457	yes
XLOC_001078	XLOC_001078	Cdk18	chr1:134010123-134036262	KO	WT	OK	2.14155	4.90381	1.19525	3.53662	5e-05	0.000399594	yes
XLOC_001098	XLOC_001098	Ppp1r12b	chr1:136651242-136852517	KO	WT	OK	9.99602	3.53312	-1.50041	-5.82029	5e-05	0.000399594	yes
XLOC_001100	XLOC_001100	Lgr6	chr1:136882929-137001853	KO	WT	OK	12.8807	2.19754	-2.55125	-8.13782	5e-05	0.000399594	yes
XLOC_001101	XLOC_001101	Ptprv	chr1:137005074-137029152	KO	WT	OK	3.34896	0.573654	-2.54546	-6.68628	5e-05	0.000399594	yes
XLOC_001165	XLOC_001165	Mr1	chr1:156975003-156993944	KO	WT	OK	3.1771	0.829727	-1.937	-4.1374	5e-05	0.000399594	yes
XLOC_001192	XLOC_001192	Zbtb37	chr1:162938922-162964980	KO	WT	OK	7.53474	2.65944	-1.50243	-4.81363	5e-05	0.000399594	yes
XLOC_001200	XLOC_001200	Dnm3	chr1:163917432-164408165	KO	WT	OK	1.60591	0.385123	-2.06	-3.46381	5e-05	0.000399594	yes
XLOC_001239	XLOC_001239	Nuf2	chr1:171428064-171461595	KO	WT	OK	15.029	36.3077	1.27253	4.96629	5e-05	0.000399594	yes
XLOC_001240	XLOC_001240	Rgs4	chr1:171671607-171677773	KO	WT	OK	0.728259	2.88209	1.98459	4.09493	5e-05	0.000399594	yes
XLOC_001303	XLOC_001303	Grem2	chr1:176763915-176851950	KO	WT	OK	1.19364	3.41333	1.51582	4.02483	5e-05	0.000399594	yes
XLOC_001307	XLOC_001307	Chml	chr1:177592552-177622763	KO	WT	OK	0.759101	15.8516	4.38419	8.29442	5e-05	0.000399594	yes
XLOC_001322	XLOC_001322	Psen2	chr1:182157134-182186431	KO	WT	OK	10.2952	4.78329	-1.1059	-3.38724	5e-05	0.000399594	yes
XLOC_001327	XLOC_001327	Ephx1	chr1:182919686-182947700	KO	WT	OK	97.0531	29.5375	-1.71623	-6.99835	5e-05	0.000399594	yes
XLOC_001331	XLOC_001331	Lbr	chr1:183745445-183772532	KO	WT	OK	21.1707	44.3629	1.06728	4.39968	5e-05	0.000399594	yes
XLOC_001358	XLOC_001358	Cenpf	chr1:191464492-191511965	KO	WT	OK	8.03133	18.7772	1.22527	4.96609	5e-05	0.000399594	yes
XLOC_001362	XLOC_001362	Vash2	chr1:192771524-192803175	KO	WT	OK	5.21724	13.5588	1.37787	5.10558	5e-05	0.000399594	yes
XLOC_001366	XLOC_001366	Atf3	chr1:192994175-193007212	KO	WT	OK	10.5777	4.00734	-1.40031	-4.3277	5e-05	0.000399594	yes
XLOC_001382	XLOC_001382	G0s2	chr1:195098353-195099382	KO	WT	OK	18.562	82.3666	2.14971	7.44279	5e-05	0.000399594	yes
XLOC_001383	XLOC_001383	Camk1g	chr1:195172539-195196476	KO	WT	OK	0.828287	2.81687	1.76589	3.7203	5e-05	0.000399594	yes
XLOC_001392	XLOC_001392	Rgs17	chr10:4424140-4520877	KO	WT	OK	3.09458	1.16279	-1.41216	-4.45605	5e-05	0.000399594	yes
XLOC_001394	XLOC_001394	Fbxo5	chr10:4541075-4547383	KO	WT	OK	25.2318	51.3745	1.02581	4.05632	5e-05	0.000399594	yes
XLOC_001430	XLOC_001430	Perp	chr10:18564876-18576878	KO	WT	OK	4.19202	0.653437	-2.68153	-4.62839	5e-05	0.000399594	yes
XLOC_001438	XLOC_001438	Map7	chr10:19868725-20001396	KO	WT	OK	1.35863	0.559625	-1.27962	-2.24646	0.00215	0.0100709	yes
XLOC_001442	XLOC_001442	Ahi1	chr10:20672352-20800235	KO	WT	OK	11.0669	5.39598	-1.0363	-3.45425	5e-05	0.000399594	yes
XLOC_001469	XLOC_001469	Ccn2	chr10:24051493-24318488	KO	WT	OK	41.8484	14.5954	-1.51966	-5.81287	5e-05	0.000399594	yes
XLOC_001500	XLOC_001500	Rev3l	chr10:39451965-39595011	KO	WT	OK	11.4653	5.45624	-1.0713	-4.40183	5e-05	0.000399594	yes
XLOC_001509	XLOC_001509	Mical1	chr10:41196119-41206836	KO	WT	OK	3.47629	7.08713	1.02765	3.51243	5e-05	0.000399594	yes
XLOC_001518	XLOC_001518	Scml4	chr10:42580317-42680588	KO	WT	OK	9.27479	3.39643	-1.44929	-4.91802	5e-05	0.000399594	yes
XLOC_001522	XLOC_001522	Cd24a	chr10:43298974-43304071	KO	WT	OK	0.723077	2.4656	1.76972	2.99667	0.00015	0.00107374	yes
XLOC_001587	XLOC_001587	Aifm2	chr10:61178010-61246612	KO	WT	OK	10.9845	4.51706	-1.28202	-2.46474	0.00175	0.00855717	yes
XLOC_001633	XLOC_001633	Chchd10	chr10:75395874-75403417	KO	WT	OK	1.98828	4.49217	1.17589	2.58186	0.0007	0.00397059	yes
XLOC_001671	XLOC_001671	Cstb	chr10:77888414-77890367	KO	WT	OK	331.612	125.198	-1.40529	-5.72588	5e-05	0.000399594	yes
XLOC_001695	XLOC_001695	Fstl3	chr10:79240018-79251730	KO	WT	OK	7.9162	3.77564	-1.06809	-3.11975	0.0001	0.000747562	yes
XLOC_001769	XLOC_001769	Tdg	chr10:82092582-82153395	KO	WT	OK	16.8599	35.1538	1.06009	4.25679	5e-05	0.000399594	yes
XLOC_001806	XLOC_001806	Anks1b	chr10:89336253-90436045	KO	WT	OK	1.1542	0.148477	-2.95858	-4.09378	5e-05	0.000399594	yes
XLOC_001872	XLOC_001872	Bbs10	chr10:110735734-110738792	KO	WT	OK	0.351132	1.24417	1.8251	2.7825	0.0013	0.00666024	yes
XLOC_001893	XLOC_001893	4933412E12Rik	chr10:116387617-116400335	KO	WT	OK	3.75099	1.81833	-1.04466	-2.20852	0.00315	0.0139679	yes
XLOC_001905	XLOC_001905	Grip1	chr10:118891089-119550021	KO	WT	OK	2.42583	0.859458	-1.49698	-2.353	0.00135	0.00688354	yes
XLOC_001906	XLOC_001906	Tmbim4	chr10:119645881-119661953	KO	WT	OK	90.1174	41.5458	-1.11711	-4.17555	5e-05	0.000399594	yes
XLOC_001928	XLOC_001928	A730063M14Rik	chr10:126507536-126508157	KO	WT	OK	13.7063	5.23674	-1.38809	-1.68157	0.02895	0.0814603	no
XLOC_001957	XLOC_001957	Gls2	chr10:127631690-127648850	KO	WT	OK	1.50988	3.50258	1.21399	1.94083	0.0102	0.0359405	yes
XLOC_002012	XLOC_002012	Esr1	chr10:5340907-5734552	KO	WT	OK	18.3407	7.46307	-1.29721	-5.24351	5e-05	0.000399594	yes
XLOC_002016	XLOC_002016	Mthfd1l	chr10:6179459-6373466	KO	WT	OK	24.1361	52.7797	1.12879	4.71266	5e-05	0.000399594	yes
XLOC_002017	XLOC_002017	Plekhg1	chr10:6379238-6606164	KO	WT	OK	1.29886	0.191866	-2.75907	-5.43781	5e-05	0.000399594	yes
XLOC_002019	XLOC_002019	Ppp1r14c	chr10:6881565-6980391	KO	WT	OK	0.621731	1.39876	1.16978	2.00395	0.0082	0.0301629	yes
XLOC_002051	XLOC_002051	Tnfaip3	chr10:18720716-18735216	KO	WT	OK	8.76152	3.07679	-1.50976	-5.29845	5e-05	0.000399594	yes
XLOC_002056	XLOC_002056	Pde7b	chr10:20116857-20444884	KO	WT	OK	3.71873	1.42325	-1.38562	-4.11909	5e-05	0.000399594	yes
XLOC_002060	XLOC_002060	E030030I06Rik	chr10:21832855-21869076	KO	WT	OK	3.00413	1.0633	-1.4984	-2.18414	0.00795	0.0294083	yes
XLOC_002092	XLOC_002092	Ncoa7	chr10:30365387-30523132	KO	WT	OK	4.05615	9.63077	1.24754	3.78749	5e-05	0.000399594	yes
XLOC_002119	XLOC_002119	Slc16a10	chr10:39753340-39862060	KO	WT	OK	1.48337	3.09139	1.05938	2.58384	0.00055	0.00324124	yes
XLOC_002176	XLOC_002176	Col13a1	chr10:61300981-61441856	KO	WT	OK	1.60804	4.85276	1.5935	4.58839	5e-05	0.000399594	yes
XLOC_002204	XLOC_002204	Zfp365	chr10:67348852-67375410	KO	WT	OK	33.6416	16.7731	-1.0041	-4.16055	5e-05	0.000399594	yes
XLOC_002210	XLOC_002210	A930033H14Rik	chr10:68671299-68754532	KO	WT	OK	0.887747	2.48541	1.48526	1.56524	0.04105	0.107392	no
XLOC_002211	XLOC_002211	Cdk1	chr10:68797895-68815660	KO	WT	OK	15.3225	51.4859	1.74853	7.20377	5e-05	0.000399594	yes
XLOC_002228	XLOC_002228	Gstt1	chr10:75246557-75261329	KO	WT	OK	9.51134	2.8726	-1.72729	-3.69113	5e-05	0.000399594	yes
XLOC_002242	XLOC_002242	Col6a2	chr10:76058500-76086375	KO	WT	OK	11.1151	2.47472	-2.16719	-7.40786	5e-05	0.000399594	yes
XLOC_002243	XLOC_002243	Col6a1	chr10:76171536-76188789	KO	WT	OK	11.7256	4.16263	-1.4941	-5.48746	5e-05	0.000399594	yes
XLOC_002244	XLOC_002244	Pcbp3	chr10:76224598-76424692	KO	WT	OK	3.51938	9.21424	1.38855	4.1675	5e-05	0.000399594	yes
XLOC_002260	XLOC_002260	Lrrc3	chr10:77360319-77365281	KO	WT	OK	1.26136	0.577932	-1.126	-2.4328	0.0018	0.00871501	yes
XLOC_002310	XLOC_002310	Mknk2	chr10:80128062-80139038	KO	WT	OK	14.1193	30.7581	1.1233	4.59092	5e-05	0.000399594	yes
XLOC_002318	XLOC_002318	Lmnb2	chr10:80364107-80380990	KO	WT	OK	24.5983	62.1227	1.33656	5.62114	5e-05	0.000399594	yes
XLOC_002319	XLOC_002319	Gng7	chr10:80411368-80477670	KO	WT	OK	1.15218	0.49391	-1.22205	-2.39785	0.00205	0.00970646	yes
XLOC_002336	XLOC_002336	Celf5	chr10:80921971-80945454	KO	WT	OK	4.83457	0.607314	-2.99287	-7.26899	5e-05	0.000399594	yes
XLOC_002339	XLOC_002339	Gna15	chr10:80965058-80986970	KO	WT	OK	1.43479	0.259984	-2.46434	-3.18244	0.00165	0.00813559	yes
XLOC_002352	XLOC_002352	Aldh1l2	chr10:82950191-82996885	KO	WT	OK	2.71459	6.57683	1.27666	4.51719	5e-05	0.000399594	yes
XLOC_002368	XLOC_002368	Parpbp	chr10:87553816-87609686	KO	WT	OK	3.04143	7.62344	1.32569	4.31542	5e-05	0.000399594	yes
XLOC_002376	XLOC_002376	Gas2l3	chr10:88871567-88906712	KO	WT	OK	2.29511	5.41596	1.23865	4.2814	5e-05	0.000399594	yes
XLOC_002426	XLOC_002426	Myf6	chr10:106929904-106931779	KO	WT	OK	0.53142	1.18206	1.15338	1.47601	0.0447	0.114729	no
XLOC_002456	XLOC_002456	Lyz2	chr10:116714596-116719328	KO	WT	OK	1.6689	0.522185	-1.67627	-1.98023	0.01725	0.0541828	no
XLOC_002474	XLOC_002474	Irak3	chr10:119578703-119639186	KO	WT	OK	1.02918	0.499979	-1.04155	-1.84028	0.0078	0.028935	yes
XLOC_002510	XLOC_002510	Shmt2	chr10:126951994-126959500	KO	WT	OK	71.7918	169.849	1.24236	5.25837	5e-05	0.000399594	yes
XLOC_002512	XLOC_002512	Lrp1	chr10:126975213-127058204	KO	WT	OK	156.202	69.98	-1.1584	-4.63205	5e-05	0.000399594	yes
XLOC_002537	XLOC_002537	Dgka	chr10:128143313-128182140	KO	WT	OK	7.19469	3.28578	-1.1307	-3.55668	5e-05	0.000399594	yes
XLOC_002587	XLOC_002587	Selenom	chr11:3414686-3417354	KO	WT	OK	21.5951	10.0713	-1.10046	-3.15184	5e-05	0.000399594	yes
XLOC_002600	XLOC_002600	Lif	chr11:4157570-4172517	KO	WT	OK	12.331	2.18335	-2.49767	-8.24185	5e-05	0.000399594	yes
XLOC_002614	XLOC_002614	Aebp1	chr11:5761868-5778259	KO	WT	OK	35.6149	7.26518	-2.29341	-5.86389	5e-05	0.000399594	yes
XLOC_002625	XLOC_002625	Upp1	chr11:9018010-9036173	KO	WT	OK	48.3262	18.129	-1.4145	-5.15814	5e-05	0.000399594	yes
XLOC_002633	XLOC_002633	Egfr	chr11:16652205-16813910	KO	WT	OK	35.1122	17.4568	-1.00819	-3.9691	5e-05	0.000399594	yes
XLOC_002677	XLOC_002677	Cpeb4	chr11:31770939-31835635	KO	WT	OK	6.31866	2.86537	-1.1409	-4.20076	5e-05	0.000399594	yes
XLOC_002729	XLOC_002729	Trim7	chr11:48639639-48664689	KO	WT	OK	4.0401	1.40105	-1.52788	-3.82506	5e-05	0.000399594	yes
XLOC_002802	XLOC_002802	Gpx3	chr11:54716355-54723889	KO	WT	OK	238.92	88.4124	-1.43421	-6.07858	5e-05	0.000399594	yes
XLOC_002816	XLOC_002816	Igtp	chr11:58013057-58021094	KO	WT	OK	2.18182	0.56239	-1.95589	-3.47353	5e-05	0.000399594	yes
XLOC_002868	XLOC_002868	Kcnj12	chr11:60836065-60886769	KO	WT	OK	0.961613	2.63935	1.45665	3.7764	5e-05	0.000399594	yes
XLOC_002870	XLOC_002870	Aldh3a1	chr11:61022243-61031918	KO	WT	OK	0.578282	2.76354	2.25667	3.47927	0.0001	0.000747562	yes
XLOC_002872	XLOC_002872	B9d1	chr11:61318645-61326433	KO	WT	OK	28.1478	12.9512	-1.11993	-3.35671	5e-05	0.000399594	yes
XLOC_002873	XLOC_002873	Grap	chr11:61466822-61486279	KO	WT	OK	3.99253	0.617371	-2.69309	-4.45329	5e-05	0.000399594	yes
XLOC_002874	XLOC_002874	Fam83g	chr11:61486283-61534301	KO	WT	OK	19.8558	3.48599	-2.50992	-9.34448	5e-05	0.000399594	yes
XLOC_002875	XLOC_002875	Specc1	chr11:61770264-62036515	KO	WT	OK	2.61501	5.71019	1.12672	4.03498	5e-05	0.000399594	yes
XLOC_002887	XLOC_002887	Fbxw10	chr11:62660624-62690964	KO	WT	OK	3.63752	0.125141	-4.86134	-6.40565	5e-05	0.000399594	yes
XLOC_002902	XLOC_002902	Myh3	chr11:66891801-66915793	KO	WT	OK	0.09751	2.61874	4.74718	7.20808	5e-05	0.000399594	yes
XLOC_002909	XLOC_002909	Gas7	chr11:67346499-67502494	KO	WT	OK	3.77375	0.788918	-2.25805	-6.66342	5e-05	0.000399594	yes
XLOC_002924	XLOC_002924	Aurkb	chr11:68859138-68865166	KO	WT	OK	26.5294	57.6676	1.12017	4.57612	5e-05	0.000399594	yes
XLOC_002942	XLOC_002942	Zbtb4	chr11:69579413-69597528	KO	WT	OK	4.39901	1.69567	-1.37532	-4.85763	5e-05	0.000399594	yes
XLOC_002983	XLOC_002983	Pimreg	chr11:71856003-71860872	KO	WT	OK	12.9328	36.0159	1.4776	5.46835	5e-05	0.000399594	yes
XLOC_002997	XLOC_002997	Camkk1	chr11:72832489-72855567	KO	WT	OK	1.23661	2.77252	1.16481	3.02598	0.00015	0.00107374	yes
XLOC_003002	XLOC_003002	Shpk	chr11:73012983-73038008	KO	WT	OK	1.63676	0.0748981	-4.44977	-4.05308	0.0059	0.023122	yes
XLOC_003031	XLOC_003031	Mir22,Mir22hg	chr11:75275040-75280192	KO	WT	OK	104.471	40.8461	-1.35484	-5.54847	5e-05	0.000399594	yes
XLOC_003045	XLOC_003045	Fam57a	chr11:76015557-76021759	KO	WT	OK	7.83158	16.5237	1.07716	2.91098	5e-05	0.000399594	yes
XLOC_003067	XLOC_003067	Mir7653,Tlcd1	chr11:77991631-77994321	KO	WT	OK	4.03317	10.1637	1.33343	2.27243	0.0003	0.00192981	yes
XLOC_003073	XLOC_003073	Spag5	chr11:78115092-78135959	KO	WT	OK	11.8027	29.7204	1.33233	5.39261	5e-05	0.000399594	yes
XLOC_003102	XLOC_003102	Ccl2	chr11:81849078-81850954	KO	WT	OK	9.83605	3.50672	-1.48796	-3.00927	0.00045	0.0027268	yes
XLOC_003103	XLOC_003103	Ccl7	chr11:81859213-81861025	KO	WT	OK	4.46708	1.44946	-1.62381	-2.43546	0.00335	0.0146729	yes
XLOC_003123	XLOC_003123	Taf15	chr11:83286609-83320245	KO	WT	OK	33.2478	87.9006	1.40261	5.7413	5e-05	0.000399594	yes
XLOC_003148	XLOC_003148	Ptrh2	chr11:86497575-86505959	KO	WT	OK	5.88187	14.2934	1.281	4.54089	5e-05	0.000399594	yes
XLOC_003149	XLOC_003149	Ska2	chr11:86922762-86936476	KO	WT	OK	18.0218	38.0887	1.07962	3.93336	5e-05	0.000399594	yes
XLOC_003192	XLOC_003192	Dlx3	chr11:94981430-94986610	KO	WT	OK	1.58766	4.93578	1.63637	4.43153	5e-05	0.000399594	yes
XLOC_003228	XLOC_003228	Sp6	chr11:96874882-96887732	KO	WT	OK	1.05413	0.134463	-2.97077	-3.32424	0.0008	0.00440859	yes
XLOC_003260	XLOC_003260	Thra	chr11:98603098-98636691	KO	WT	OK	21.0342	8.78943	-1.2589	-2.36781	0.0011	0.0057555	yes
XLOC_003267	XLOC_003267	Igfbp4	chr11:98902557-98913969	KO	WT	OK	4.59317	13.4971	1.55509	5.02137	5e-05	0.000399594	yes
XLOC_003295	XLOC_003295	Tubg2	chr11:101017197-101023101	KO	WT	OK	1.39137	0.683684	-1.0251	-1.69527	0.0218	0.0650638	no
XLOC_003323	XLOC_003323	Rundc3a	chr11:102254716-102263869	KO	WT	OK	0.595487	1.47331	1.30692	2.32103	0.0019	0.00911321	yes
XLOC_003338	XLOC_003338	C130046K22Rik	chr11:103559037-103586887	KO	WT	OK	0.733952	2.20275	1.58555	3.59841	0.0001	0.000747562	yes
XLOC_003344	XLOC_003344	Myl4	chr11:104411976-104448529	KO	WT	OK	2.18029	6.56362	1.58997	3.11858	5e-05	0.000399594	yes
XLOC_003350	XLOC_003350	Tanc2	chr11:105451299-105790617	KO	WT	OK	13.556	6.59463	-1.03957	-4.34961	5e-05	0.000399594	yes
XLOC_003372	XLOC_003372	Axin2	chr11:108781662-108812095	KO	WT	OK	1.31517	0.373411	-1.81642	-3.63456	0.0001	0.000747562	yes
XLOC_003422	XLOC_003422	Sphk1	chr11:116392413-116397989	KO	WT	OK	11.4028	3.60411	-1.66167	-4.73859	5e-05	0.000399594	yes
XLOC_003444	XLOC_003444	Birc5	chr11:117710550-117717057	KO	WT	OK	47.0371	136.317	1.53509	5.8444	5e-05	0.000399594	yes
XLOC_003451	XLOC_003451	Cbx2	chr11:118884334-118892589	KO	WT	OK	3.20754	8.17627	1.34998	4.63395	5e-05	0.000399594	yes
XLOC_003467	XLOC_003467	0610009L18Rik	chr11:120209991-120212504	KO	WT	OK	3.78469	1.07668	-1.81358	-2.12815	0.01265	0.0423484	yes
XLOC_003479	XLOC_003479	Rac3	chr11:120582781-120585283	KO	WT	OK	4.52221	0.894759	-2.33746	-3.66235	0.00025	0.00166535	yes
XLOC_003481	XLOC_003481	Slc16a3	chr11:120809797-120820314	KO	WT	OK	4.49393	11.9908	1.41588	4.63074	5e-05	0.000399594	yes
XLOC_003498	XLOC_003498	Tug1	chr11:3539787-3548817	KO	WT	OK	9.98177	19.9938	1.00219	4.06306	5e-05	0.000399594	yes
XLOC_003502	XLOC_003502	Tcn2	chr11:3817080-3832081	KO	WT	OK	14.4678	3.54647	-2.02839	-6.24769	5e-05	0.000399594	yes
XLOC_003526	XLOC_003526	Camk2b	chr11:5869665-5965751	KO	WT	OK	1.89594	0.542632	-1.80487	-3.83478	5e-05	0.000399594	yes
XLOC_003533	XLOC_003533	Purb	chr11:6367601-6376079	KO	WT	OK	48.144	132.511	1.46068	6.08633	5e-05	0.000399594	yes
XLOC_003549	XLOC_003549	Fignl1	chr11:11700290-11708965	KO	WT	OK	17.0013	36.3923	1.09799	4.37941	5e-05	0.000399594	yes
XLOC_003614	XLOC_003614	Spdl1	chr11:34622686-34647143	KO	WT	OK	6.04827	14.098	1.2209	4.31149	5e-05	0.000399594	yes
XLOC_003617	XLOC_003617	Wwc1	chr11:35651900-35794029	KO	WT	OK	1.19597	3.58687	1.58455	4.54989	5e-05	0.000399594	yes
XLOC_003622	XLOC_003622	Hmmr	chr11:40514889-40546939	KO	WT	OK	11.9706	33.3922	1.48002	5.93974	5e-05	0.000399594	yes
XLOC_003636	XLOC_003636	Nipal4	chr11:45961656-45979861	KO	WT	OK	1.06138	0.242564	-2.1295	-3.31716	5e-05	0.000399594	yes
XLOC_003647	XLOC_003647	9930111J21Rik1,9930111J21Rik2,Psme2b	chr11:48758850-48792900	KO	WT	OK	3.59838	1.18275	-1.6052	-2.73841	0.0005	0.00298533	yes
XLOC_003655	XLOC_003655	Ltc4s	chr11:50049962-50052034	KO	WT	OK	107.059	13.4592	-2.99174	-8.59754	5e-05	0.000399594	yes
XLOC_003673	XLOC_003673	Jade2	chr11:51626949-51671170	KO	WT	OK	2.20345	1.00366	-1.13449	-3.30993	5e-05	0.000399594	yes
XLOC_003714	XLOC_003714	Zfp672	chr11:58128615-58143841	KO	WT	OK	21.4728	10.5652	-1.02319	-1.89733	0.0056	0.022182	yes
XLOC_003759	XLOC_003759	Shmt1	chr11:60602398-60624767	KO	WT	OK	15.0776	40.8237	1.437	5.61789	5e-05	0.000399594	yes
XLOC_003776	XLOC_003776	Cenpv	chr11:62338445-62352763	KO	WT	OK	9.43255	25.2483	1.42046	4.42295	5e-05	0.000399594	yes
XLOC_003792	XLOC_003792	Adprm	chr11:66851381-66866120	KO	WT	OK	15.8988	7.46589	-1.09053	-3.49696	5e-05	0.000399594	yes
XLOC_003796	XLOC_003796	Usp43	chr11:67668024-67735655	KO	WT	OK	0.38801	1.5193	1.96924	4.10268	5e-05	0.000399594	yes
XLOC_003808	XLOC_003808	Chd3	chr11:69156774-69182928	KO	WT	OK	2.02861	4.28216	1.07785	3.8675	5e-05	0.000399594	yes
XLOC_003832	XLOC_003832	Tmem95	chr11:69689555-69691557	KO	WT	OK	22.5655	1.51429	-3.89741	-8.37808	5e-05	0.000399594	yes
XLOC_003836	XLOC_003836	2810408A11Rik	chr11:69710853-69714489	KO	WT	OK	0.669273	1.70615	1.35007	2.10437	0.00315	0.0139679	yes
XLOC_003842	XLOC_003842	Bcl6b	chr11:70037628-70043300	KO	WT	OK	1.19968	0.311398	-1.94582	-3.26969	0.0003	0.00192981	yes
XLOC_003845	XLOC_003845	Rnasek	chr11:70051624-70053354	KO	WT	OK	227.477	102.535	-1.14961	-4.53466	5e-05	0.000399594	yes
XLOC_003850	XLOC_003850	Cxcl16	chr11:70267890-70279703	KO	WT	OK	2.18912	0.699022	-1.64694	-2.43523	0.00135	0.00688354	yes
XLOC_003878	XLOC_003878	Haspin	chr11:72904084-72960951	KO	WT	OK	2.11515	8.61074	2.02538	6.03177	5e-05	0.000399594	yes
XLOC_003903	XLOC_003903	Sgsm2	chr11:74662765-74710582	KO	WT	OK	11.5165	2.96638	-1.95693	-7.09534	5e-05	0.000399594	yes
XLOC_003907	XLOC_003907	Hic1	chr11:74978066-74983757	KO	WT	OK	10.4067	4.40747	-1.23948	-4.19869	5e-05	0.000399594	yes
XLOC_003910	XLOC_003910	Serpinf1	chr11:75223530-75236125	KO	WT	OK	187.764	413.436	1.13875	4.84864	5e-05	0.000399594	yes
XLOC_003948	XLOC_003948	Tmem97	chr11:78355318-78364237	KO	WT	OK	27.723	59.7145	1.107	4.35446	5e-05	0.000399594	yes
XLOC_003951	XLOC_003951	Lgals9	chr11:78776480-78798426	KO	WT	OK	7.0521	2.38192	-1.56593	-3.7799	5e-05	0.000399594	yes
XLOC_003975	XLOC_003975	Slfn9	chr11:82793804-82805332	KO	WT	OK	7.56643	19.1517	1.33979	5.11469	5e-05	0.000399594	yes
XLOC_003995	XLOC_003995	Dhrs11	chr11:84634229-84642505	KO	WT	OK	6.86343	3.24927	-1.07881	-2.75992	0.0002	0.00138545	yes
XLOC_004015	XLOC_004015	Ypel2	chr11:86749926-86807264	KO	WT	OK	3.9302	0.952164	-2.04532	-5.62398	5e-05	0.000399594	yes
XLOC_004018	XLOC_004018	Prr11	chr11:86902657-86922216	KO	WT	OK	9.30807	32.9981	1.82583	7.19261	5e-05	0.000399594	yes
XLOC_004058	XLOC_004058	Sgca	chr11:94824090-94837641	KO	WT	OK	78.6752	21.6048	-1.86456	-7.3881	5e-05	0.000399594	yes
XLOC_004092	XLOC_004092	Epop	chr11:97488700-97491030	KO	WT	OK	3.18263	10.9909	1.78802	5.50764	5e-05	0.000399594	yes
XLOC_004103	XLOC_004103	Stac2	chr11:97897937-97914776	KO	WT	OK	2.30211	8.11326	1.81732	5.72163	5e-05	0.000399594	yes
XLOC_004113	XLOC_004113	Nr1d1	chr11:98603098-98636691	KO	WT	OK	68.433	22.3556	-1.61406	-5.7469	5e-05	0.000399594	yes
XLOC_004116	XLOC_004116	Top2a	chr11:98854260-98885503	KO	WT	OK	48.7746	126.621	1.37631	5.7397	5e-05	0.000399594	yes
XLOC_004200	XLOC_004200	Vat1	chr11:101320061-101327513	KO	WT	OK	57.9268	26.2668	-1.14099	-4.74191	5e-05	0.000399594	yes
XLOC_004220	XLOC_004220	Fam171a2	chr11:102298295-102308977	KO	WT	OK	1.96948	4.54741	1.20723	3.4203	5e-05	0.000399594	yes
XLOC_004238	XLOC_004238	Arhgap27	chr11:103192797-103225006	KO	WT	OK	5.76082	1.14401	-2.33217	-6.02208	5e-05	0.000399594	yes
XLOC_004267	XLOC_004267	Kpna2	chr11:106849942-106860839	KO	WT	OK	45.2894	124.104	1.45431	6.10835	5e-05	0.000399594	yes
XLOC_004280	XLOC_004280	Fam20a	chr11:109534239-109583552	KO	WT	OK	1.72839	0.306182	-2.49697	-3.94058	0.00025	0.00166535	yes
XLOC_004282	XLOC_004282	Abca8b	chr11:109793519-109857159	KO	WT	OK	6.53378	1.24851	-2.38771	-7.89627	5e-05	0.000399594	yes
XLOC_004283	XLOC_004283	Abca8a	chr11:109886947-109957251	KO	WT	OK	2.20696	0.656993	-1.74811	-4.38241	5e-05	0.000399594	yes
XLOC_004339	XLOC_004339	Rnf157	chr11:116197658-116274346	KO	WT	OK	0.253117	1.25727	2.31242	4.32538	5e-05	0.000399594	yes
XLOC_004352	XLOC_004352	Tk1	chr11:117676832-117701222	KO	WT	OK	30.9138	96.8942	1.64816	6.23532	5e-05	0.000399594	yes
XLOC_004360	XLOC_004360	Lgals3bp	chr11:118254060-118263273	KO	WT	OK	8.4211	3.00999	-1.48425	-4.36451	5e-05	0.000399594	yes
XLOC_004375	XLOC_004375	Cep131	chr11:119925743-119948141	KO	WT	OK	2.47351	5.26256	1.0892	3.50667	5e-05	0.000399594	yes
XLOC_004379	XLOC_004379	2900052L18Rik	chr11:120086842-120092931	KO	WT	OK	3.08369	1.23209	-1.32355	-4.04395	5e-05	0.000399594	yes
XLOC_004400	XLOC_004400	Dcxr	chr11:120585859-120588598	KO	WT	OK	35.7955	6.27418	-2.51228	-8.50595	5e-05	0.000399594	yes
XLOC_004423	XLOC_004423	Pomc	chr12:3954944-3960643	KO	WT	OK	3.8488	1.27046	-1.59906	-2.45484	0.0018	0.00871501	yes
XLOC_004441	XLOC_004441	Wdr35	chr12:8980806-9035653	KO	WT	OK	29.7289	9.89621	-1.58692	-6.41648	5e-05	0.000399594	yes
XLOC_004473	XLOC_004473	Mboat2	chr12:25516463-25645164	KO	WT	OK	4.35609	8.83514	1.02022	3.38039	5e-05	0.000399594	yes
XLOC_004478	XLOC_004478	Cmpk2	chr12:27154079-27164702	KO	WT	OK	0.322841	1.07085	1.72986	2.79735	0.00075	0.00420171	yes
XLOC_004516	XLOC_004516	Etv1	chr12:39506668-39594802	KO	WT	OK	0.750285	1.62238	1.1126	2.5269	0.00085	0.00464294	yes
XLOC_004523	XLOC_004523	Nrcam	chr12:45429871-45702833	KO	WT	OK	8.87818	1.95316	-2.18445	-7.87066	5e-05	0.000399594	yes
XLOC_004534	XLOC_004534	Npas3	chr12:54349418-55173159	KO	WT	OK	1.24273	0.372647	-1.73763	-3.57868	5e-05	0.000399594	yes
XLOC_004564	XLOC_004564	Klhdc1	chr12:70342818-70384948	KO	WT	OK	6.04157	2.27248	-1.41066	-3.60397	5e-05	0.000399594	yes
XLOC_004633	XLOC_004633	Dcaf4	chr12:84861415-84882942	KO	WT	OK	21.3764	9.96854	-1.10057	-4.0592	5e-05	0.000399594	yes
XLOC_004640	XLOC_004640	Acot4	chr12:85379328-85385673	KO	WT	OK	2.87472	0.793324	-1.85744	-3.63621	0.0001	0.000747562	yes
XLOC_004690	XLOC_004690	Tshr	chr12:92236931-92786285	KO	WT	OK	2.18059	0.287307	-2.92405	-2.45677	0.0208	0.0626814	no
XLOC_004721	XLOC_004721	Ifi27	chr12:104672082-104681890	KO	WT	OK	56.6925	21.1391	-1.42324	-5.02315	5e-05	0.000399594	yes
XLOC_004743	XLOC_004743	Bdkrb2	chr12:106801381-106831281	KO	WT	OK	10.5841	3.75971	-1.49321	-4.18323	5e-05	0.000399594	yes
XLOC_004753	XLOC_004753	Evl	chr12:109609362-109940516	KO	WT	OK	11.227	25.7333	1.19666	2.82951	0.0002	0.00138545	yes
XLOC_004757	XLOC_004757	Slc25a47	chr12:110089338-110095025	KO	WT	OK	1.10244	2.9602	1.42499	2.70625	0.00085	0.00464294	yes
XLOC_004773	XLOC_004773	Rian	chr12:110842154-110899921	KO	WT	OK	6.48375	2.93018	-1.14584	-3.65547	5e-05	0.000399594	yes
XLOC_004823	XLOC_004823	B930059L03Rik	chr12:111829583-111830889	KO	WT	OK	1.36215	0.366545	-1.89383	-2.18991	0.01235	0.0416156	yes
XLOC_004832	XLOC_004832	Amn	chr12:112509306-112514637	KO	WT	OK	4.05945	0.740183	-2.45533	-4.12358	5e-05	0.000399594	yes
XLOC_004834	XLOC_004834	Exoc3l4	chr12:112655640-112669891	KO	WT	OK	2.28331	0.688516	-1.72957	-3.6909	5e-05	0.000399594	yes
XLOC_004850	XLOC_004850	Adssl1	chr12:113858257-113879566	KO	WT	OK	0.558353	2.13177	1.9328	3.16491	0.0003	0.00192981	yes
XLOC_004864	XLOC_004864	Tmem121	chr12:114424113-114427733	KO	WT	OK	3.55549	8.36144	1.2337	3.2223	5e-05	0.000399594	yes
XLOC_004899	XLOC_004899	Gen1	chr12:11245743-11272613	KO	WT	OK	4.9743	11.4346	1.20084	4.50747	5e-05	0.000399594	yes
XLOC_004911	XLOC_004911	Lpin1	chr12:16542474-16617772	KO	WT	OK	4.12077	1.65177	-1.3189	-4.23968	5e-05	0.000399594	yes
XLOC_004912	XLOC_004912	Greb1	chr12:16677420-16807692	KO	WT	OK	43.4493	19.6172	-1.14721	-4.85853	5e-05	0.000399594	yes
XLOC_004913	XLOC_004913	Pqlc3	chr12:16995453-17006924	KO	WT	OK	34.8039	12.2749	-1.50354	-5.67274	5e-05	0.000399594	yes
XLOC_004924	XLOC_004924	LOC102639700	chr12:24897104-24937698	KO	WT	OK	0.267029	1.53355	2.5218	4.4372	5e-05	0.000399594	yes
XLOC_004929	XLOC_004929	Rnf144a	chr12:26991658-27100127	KO	WT	OK	0.61761	1.47814	1.25901	2.89949	0.0003	0.00192981	yes
XLOC_004931	XLOC_004931	Rsad2	chr12:27127607-27141317	KO	WT	OK	0.502517	1.34708	1.42259	2.72346	0.0011	0.0057555	yes
XLOC_004935	XLOC_004935	Sox11	chr12:28019132-28027583	KO	WT	OK	9.34588	23.8907	1.35405	5.60401	5e-05	0.000399594	yes
XLOC_004996	XLOC_004996	Nfkbia	chr12:56590395-56593634	KO	WT	OK	110.117	46.4378	-1.24567	-5.11691	5e-05	0.000399594	yes
XLOC_005001	XLOC_005001	Nkx2-9	chr12:57712383-57714271	KO	WT	OK	1.07513	0.334802	-1.68313	-1.68804	0.03485	0.0942427	no
XLOC_005014	XLOC_005014	Mis18bp1	chr12:66233720-66273567	KO	WT	OK	6.08867	14.5642	1.25823	4.66326	5e-05	0.000399594	yes
XLOC_005047	XLOC_005047	Tmem30b	chr12:74644100-74647382	KO	WT	OK	7.51512	3.68874	-1.02667	-3.33753	5e-05	0.000399594	yes
XLOC_005063	XLOC_005063	Plek2	chr12:79989683-80007925	KO	WT	OK	2.65412	0.61377	-2.11246	-3.43551	0.00015	0.00107374	yes
XLOC_005071	XLOC_005071	2310015A10Rik	chr12:81221532-81233831	KO	WT	OK	1.49002	0.565691	-1.39725	-3.18402	5e-05	0.000399594	yes
XLOC_005079	XLOC_005079	Gm20337	chr12:82043638-82046386	KO	WT	OK	1.21366	0.422456	-1.5225	-1.66492	0.0373	0.0993208	no
XLOC_005100	XLOC_005100	Ltbp2	chr12:86124161-86220705	KO	WT	OK	100.824	11.6584	-3.1124	-12.7461	5e-05	0.000399594	yes
XLOC_005104	XLOC_005104	Pgf	chr12:86507588-86518263	KO	WT	OK	87.9556	25.2844	-1.79853	-7.2649	5e-05	0.000399594	yes
XLOC_005189	XLOC_005189	Clmn	chr12:106001323-106103286	KO	WT	OK	2.21347	0.887832	-1.31795	-4.40731	5e-05	0.000399594	yes
XLOC_005191	XLOC_005191	Snhg10	chr12:106268826-106270489	KO	WT	OK	7.26676	1.84259	-1.97957	-2.51051	0.00525	0.0210499	yes
XLOC_005206	XLOC_005206	Begain	chr12:110270391-110306452	KO	WT	OK	1.77705	0.670104	-1.40703	-2.6494	0.0007	0.00397059	yes
XLOC_005214	XLOC_005214	Mok	chr12:112046007-112079149	KO	WT	OK	1.57668	0.76718	-1.03925	-1.71095	0.01705	0.053626	no
XLOC_005219	XLOC_005219	Gm266	chr12:112722819-112724034	KO	WT	OK	2.54628	0.971045	-1.39078	-2.08639	0.01035	0.0363173	yes
XLOC_005221	XLOC_005221	Ckb	chr12:112907565-112910549	KO	WT	OK	87.5398	34.1869	-1.35649	-5.47698	5e-05	0.000399594	yes
XLOC_005224	XLOC_005224	Ppp1r13b	chr12:113066668-113146266	KO	WT	OK	5.61483	2.68155	-1.06617	-3.63048	5e-05	0.000399594	yes
XLOC_005270	XLOC_005270	Idi1	chr13:8884851-8891642	KO	WT	OK	2.27805	4.62102	1.02041	2.8496	0.00035	0.00220107	yes
XLOC_005303	XLOC_005303	H2ac13	chr13:21808280-21808728	KO	WT	OK	1.92441	4.98344	1.37272	1.56587	0.0439	0.113267	no
XLOC_005304	XLOC_005304	H3c10	chr13:21809496-21809984	KO	WT	OK	1.18028	3.97917	1.75335	1.75143	0.0315	0.0870176	no
XLOC_005314	XLOC_005314	H2bc12	chr13:22127689-22128189	KO	WT	OK	1.26295	6.63093	2.39242	2.50809	0.0088	0.0319714	yes
XLOC_005315	XLOC_005315	H2bc11	chr13:22135066-22135527	KO	WT	OK	6.15521	17.6103	1.51654	2.76361	0.0007	0.00397059	yes
XLOC_005338	XLOC_005338	H4c8	chr13:23622912-23623347	KO	WT	OK	12.779	2.65416	-2.26746	-2.87078	0.0028	0.0126439	yes
XLOC_005345	XLOC_005345	H3c4	chr13:23667631-23668135	KO	WT	OK	0.319145	1.72879	2.43748	1.22345	0.0373	0.0993208	no
XLOC_005353	XLOC_005353	H4c2	chr13:23848805-23849255	KO	WT	OK	1.82249	4.83025	1.40619	1.49996	0.0454	0.116021	no
XLOC_005391	XLOC_005391	Foxf2	chr13:31717684-31723275	KO	WT	OK	2.53103	6.7901	1.42371	3.94142	5e-05	0.000399594	yes
XLOC_005432	XLOC_005432	Hivep1	chr13:42147389-42280395	KO	WT	OK	8.54725	4.15485	-1.04066	-4.1701	5e-05	0.000399594	yes
XLOC_005435	XLOC_005435	Sirt5	chr13:43466084-43490572	KO	WT	OK	3.93208	1.85258	-1.08575	-2.27236	0.0034	0.0148368	yes
XLOC_005444	XLOC_005444	Gmpr	chr13:45602812-45641755	KO	WT	OK	3.19313	1.58248	-1.01278	-2.12489	0.005	0.0202193	yes
XLOC_005446	XLOC_005446	Rbm24	chr13:46513668-46526468	KO	WT	OK	20.7572	56.533	1.44548	5.9599	5e-05	0.000399594	yes
XLOC_005455	XLOC_005455	Fam120aos	chr13:49063480-49065274	KO	WT	OK	18.5072	5.05427	-1.87251	-5.39638	5e-05	0.000399594	yes
XLOC_005462	XLOC_005462	Ogn	chr13:49559427-49748100	KO	WT	OK	13.9848	2.8205	-2.30983	-5.59806	5e-05	0.000399594	yes
XLOC_005486	XLOC_005486	Higd2a	chr13:54691591-54692508	KO	WT	OK	163.305	76.2925	-1.09796	-4.12091	5e-05	0.000399594	yes
XLOC_005506	XLOC_005506	Txndc15	chr13:55816010-55827588	KO	WT	OK	6.41256	16.7128	1.38199	4.34116	5e-05	0.000399594	yes
XLOC_005515	XLOC_005515	Idnk	chr13:58259009-58266054	KO	WT	OK	8.59986	3.79325	-1.18088	-3.13769	5e-05	0.000399594	yes
XLOC_005524	XLOC_005524	Dapk1	chr13:60703307-60864552	KO	WT	OK	15.5472	3.38691	-2.19861	-8.31727	5e-05	0.000399594	yes
XLOC_005526	XLOC_005526	Zfp808	chr13:62231249-62275296	KO	WT	OK	0.693864	2.38381	1.78054	3.63711	5e-05	0.000399594	yes
XLOC_005544	XLOC_005544	9430065F17Rik	chr13:67654137-67671829	KO	WT	OK	1.47425	0.126018	-3.54829	-0.705676	0.0283	0.0801087	no
XLOC_005546	XLOC_005546	Zfp493	chr13:67880629-67890017	KO	WT	OK	1.07631	0.50579	-1.08948	-1.99268	0.0091	0.0327289	yes
XLOC_005563	XLOC_005563	Lpcat1	chr13:73604678-73653861	KO	WT	OK	6.23786	13.4998	1.11381	4.13774	5e-05	0.000399594	yes
XLOC_005604	XLOC_005604	Dhfr	chr13:92981832-93159008	KO	WT	OK	6.89583	14.6562	1.08772	3.4722	5e-05	0.000399594	yes
XLOC_005631	XLOC_005631	Rps18-ps4	chr13:98521066-98530918	KO	WT	OK	1.60179	64.9567	5.34172	10.0081	5e-05	0.000399594	yes
XLOC_005659	XLOC_005659	Depdc1b	chr13:109106530-109179751	KO	WT	OK	2.11858	6.68656	1.65817	4.50107	5e-05	0.000399594	yes
XLOC_005755	XLOC_005755	H3c11	chr13:21874783-21875266	KO	WT	OK	1.01948	4.08102	2.0011	1.92574	0.0259	0.0748222	no
XLOC_005759	XLOC_005759	Hist1h2ao	chr13:21924892-21925444	KO	WT	OK	2.46759	8.50774	1.78567	2.42635	0.0018	0.00871501	yes
XLOC_005764	XLOC_005764	H2ac11	chr13:22134346-22134818	KO	WT	OK	5.28261	16.5145	1.64441	2.80211	0.0003	0.00192981	yes
XLOC_005790	XLOC_005790	H2ac8	chr13:23662531-23663089	KO	WT	OK	4.8538	14.2376	1.55252	2.83773	0.00045	0.0027268	yes
XLOC_005795	XLOC_005795	H4c3	chr13:23789952-23790327	KO	WT	OK	1.87676	6.96874	1.89265	1.79636	0.03675	0.098233	no
XLOC_005797	XLOC_005797	H3c3	chr13:23836910-23837390	KO	WT	OK	11.2362	26.0533	1.21331	2.73187	0.0007	0.00397059	yes
XLOC_005799	XLOC_005799	H3c1	chr13:23853753-23854255	KO	WT	OK	3.04254	6.80736	1.16182	1.59496	0.0299	0.083635	no
XLOC_005805	XLOC_005805	Gmnn	chr13:24843713-24853806	KO	WT	OK	22.9752	50.1329	1.12568	4.09899	5e-05	0.000399594	yes
XLOC_005825	XLOC_005825	Sox4	chr13:29040788-29045568	KO	WT	OK	76.9759	33.0755	-1.21864	-5.17013	5e-05	0.000399594	yes
XLOC_005854	XLOC_005854	Nrn1	chr13:36817490-36826346	KO	WT	OK	4.30674	18.6309	2.11303	6.17195	5e-05	0.000399594	yes
XLOC_005877	XLOC_005877	Atxn1	chr13:45645124-46060360	KO	WT	OK	9.43807	3.6091	-1.38685	-5.54173	5e-05	0.000399594	yes
XLOC_005924	XLOC_005924	Gprin1	chr13:54838031-54851235	KO	WT	OK	0.292163	1.88825	2.69221	5.28197	5e-05	0.000399594	yes
XLOC_005945	XLOC_005945	Cxcl14	chr13:56390005-56397912	KO	WT	OK	1.59211	0.736483	-1.11222	-1.85979	0.01275	0.0426228	yes
XLOC_005969	XLOC_005969	Gas1	chr13:60275765-60278896	KO	WT	OK	12.4484	40.3354	1.69609	6.73854	5e-05	0.000399594	yes
XLOC_005988	XLOC_005988	Zfp934	chr13:62618154-62659989	KO	WT	OK	0.889889	1.92973	1.1167	2.04799	0.00525	0.0210499	yes
XLOC_005989	XLOC_005989	6720489N17Rik	chr13:62704374-62725542	KO	WT	OK	0.446793	1.84755	2.04794	3.2839	0.00025	0.00166535	yes
XLOC_005999	XLOC_005999	Slc35d2	chr13:64197617-64230638	KO	WT	OK	2.69484	0.813671	-1.72768	-3.40698	5e-05	0.000399594	yes
XLOC_006015	XLOC_006015	Rslcan18,Zfp708	chr13:67170333-67214964	KO	WT	OK	2.8131	1.34118	-1.06866	-2.48273	0.0008	0.00440859	yes
XLOC_006022	XLOC_006022	Zfp874a	chr13:67541366-67552560	KO	WT	OK	7.40284	3.41347	-1.11684	-3.61886	5e-05	0.000399594	yes
XLOC_006027	XLOC_006027	Zfp729b	chr13:67690375-67710644	KO	WT	OK	4.62757	2.24535	-1.04332	-3.33736	5e-05	0.000399594	yes
XLOC_006052	XLOC_006052	Trip13	chr13:74049909-74075215	KO	WT	OK	12.1093	36.6896	1.59925	6.11969	5e-05	0.000399594	yes
XLOC_006065	XLOC_006065	Arsk	chr13:76197869-76236108	KO	WT	OK	5.9358	2.94721	-1.01009	-3.23488	5e-05	0.000399594	yes
XLOC_006114	XLOC_006114	Arhgef28	chr13:98668549-98976120	KO	WT	OK	2.78032	0.89161	-1.64077	-4.80846	5e-05	0.000399594	yes
XLOC_006141	XLOC_006141	Ccnb1	chr13:101548693-101556441	KO	WT	OK	30.723	128.128	2.0602	8.46227	5e-05	0.000399594	yes
XLOC_006170	XLOC_006170	Gpx8	chr13:113825586-113881343	KO	WT	OK	142.224	68.0281	-1.06396	-4.36182	5e-05	0.000399594	yes
XLOC_006241	XLOC_006241	3830406C13Rik	chr14:13116716-13135745	KO	WT	OK	15.4172	7.59114	-1.02215	-3.59774	5e-05	0.000399594	yes
XLOC_006246	XLOC_006246	Il3ra	chr14:15179008-15188004	KO	WT	OK	12.9454	4.30508	-1.58833	-4.44021	5e-05	0.000399594	yes
XLOC_006299	XLOC_006299	Il17rd	chr14:27852186-27920472	KO	WT	OK	7.15448	2.73895	-1.38522	-5.24853	5e-05	0.000399594	yes
XLOC_006303	XLOC_006303	Wnt5a	chr14:29318658-29340633	KO	WT	OK	3.49806	1.60638	-1.12275	-3.54274	5e-05	0.000399594	yes
XLOC_006304	XLOC_006304	Lrtm1	chr14:29718128-30535050	KO	WT	OK	1.4161	0.631619	-1.1648	-3.03804	5e-05	0.000399594	yes
XLOC_006320	XLOC_006320	Nt5dc2	chr14:31944274-31981827	KO	WT	OK	29.2478	71.3101	1.28578	5.10659	5e-05	0.000399594	yes
XLOC_006321	XLOC_006321	Tnnc1	chr14:32021497-32024915	KO	WT	OK	1.89334	8.39939	2.14935	3.53384	0.00025	0.00166535	yes
XLOC_006346	XLOC_006346	Anxa8	chr14:34864315-34915940	KO	WT	OK	3.77249	0.602022	-2.64763	-4.64441	5e-05	0.000399594	yes
XLOC_006380	XLOC_006380	Cdkn3	chr14:47380215-47391196	KO	WT	OK	6.18965	16.9754	1.45551	3.62894	5e-05	0.000399594	yes
XLOC_006416	XLOC_006416	Ang,Rnase4	chr14:51710751-51725826	KO	WT	OK	21.5033	10.2817	-1.06448	-3.41913	5e-05	0.000399594	yes
XLOC_006435	XLOC_006435	Abhd4	chr14:54873803-54888844	KO	WT	OK	134.033	36.6407	-1.87107	-7.95398	5e-05	0.000399594	yes
XLOC_006438	XLOC_006438	Mmp14	chr14:55050434-55061293	KO	WT	OK	37.1963	15.8773	-1.22819	-5.06913	5e-05	0.000399594	yes
XLOC_006440	XLOC_006440	Rem2	chr14:55094936-55099271	KO	WT	OK	0.318389	1.51572	2.25115	3.08919	0.00095	0.00508332	yes
XLOC_006458	XLOC_006458	Pck2	chr14:56159102-56168857	KO	WT	OK	9.38657	27.0707	1.52806	5.99888	5e-05	0.000399594	yes
XLOC_006460	XLOC_006460	Fitm1	chr14:56194510-56195789	KO	WT	OK	40.9277	15.228	-1.42635	-4.66825	5e-05	0.000399594	yes
XLOC_006468	XLOC_006468	Ltb4r2	chr14:56380264-56382066	KO	WT	OK	9.17304	0.43379	-4.40233	-5.50451	0.00015	0.00107374	yes
XLOC_006469	XLOC_006469	Ltb4r1	chr14:56384798-56387329	KO	WT	OK	8.49219	0.188088	-5.49666	-4.84438	0.0153	0.0492907	yes
XLOC_006492	XLOC_006492	Shisa2	chr14:60244117-60250497	KO	WT	OK	1.53371	7.23328	2.23762	6.10612	5e-05	0.000399594	yes
XLOC_006504	XLOC_006504	Fam124a	chr14:63174573-63227322	KO	WT	OK	7.73374	2.22066	-1.80018	-5.73367	5e-05	0.000399594	yes
XLOC_006552	XLOC_006552	Egr3	chr14:70477123-70482420	KO	WT	OK	10.3457	3.22084	-1.68352	-5.81735	5e-05	0.000399594	yes
XLOC_006557	XLOC_006557	Reep4	chr14:70945057-70948742	KO	WT	OK	11.9245	30.4979	1.35478	4.97983	5e-05	0.000399594	yes
XLOC_006588	XLOC_006588	Ccdc122	chr14:77436578-77512070	KO	WT	OK	3.09132	1.14002	-1.43917	-2.77907	0.00015	0.00107374	yes
XLOC_006622	XLOC_006622	Slitrk5	chr14:112074336-112082357	KO	WT	OK	0.420344	1.92244	2.1933	4.80373	5e-05	0.000399594	yes
XLOC_006703	XLOC_006703	Mss51	chr14:21302085-21316123	KO	WT	OK	1.90088	0.658938	-1.52845	-2.55015	0.00165	0.00813559	yes
XLOC_006770	XLOC_006770	Sncg	chr14:35183459-35187855	KO	WT	OK	12.3219	3.02995	-2.02386	-4.03458	5e-05	0.000399594	yes
XLOC_006819	XLOC_006819	Dlgap5	chr14:48007453-48038082	KO	WT	OK	9.11665	22.7028	1.3163	5.08835	5e-05	0.000399594	yes
XLOC_006917	XLOC_006917	Sdr39u1	chr14:56503778-56519069	KO	WT	OK	27.8504	11.8784	-1.22936	-2.23124	0.00235	0.0108782	yes
XLOC_006945	XLOC_006945	Ska3	chr14:58425397-58445000	KO	WT	OK	8.87418	17.9665	1.01762	3.66404	5e-05	0.000399594	yes
XLOC_006985	XLOC_006985	Fzd3	chr14:65811277-65881300	KO	WT	OK	1.47597	3.12929	1.08417	3.85266	5e-05	0.000399594	yes
XLOC_006988	XLOC_006988	Esco2	chr14:66437863-66452806	KO	WT	OK	7.32284	14.8546	1.02043	3.61719	5e-05	0.000399594	yes
XLOC_006993	XLOC_006993	Ptk2b	chr14:66772093-66899889	KO	WT	OK	8.70707	4.05893	-1.10109	-3.94644	5e-05	0.000399594	yes
XLOC_007000	XLOC_007000	Cdca2	chr14:68294410-68333898	KO	WT	OK	6.45449	15.9709	1.30707	4.94077	5e-05	0.000399594	yes
XLOC_007016	XLOC_007016	Pdlim2	chr14:70564024-70577479	KO	WT	OK	10.8266	5.3834	-1.00799	-3.07913	5e-05	0.000399594	yes
XLOC_007033	XLOC_007033	Itm2b	chr14:73762032-73785096	KO	WT	OK	259.983	129.358	-1.00705	-4.30855	5e-05	0.000399594	yes
XLOC_007056	XLOC_007056	Rgcc	chr14:79688556-79701442	KO	WT	OK	3.79529	0.841123	-2.17382	-3.02021	0.0015	0.00750254	yes
XLOC_007064	XLOC_007064	Diaph3	chr14:87055163-87541031	KO	WT	OK	10.4746	23.8223	1.18541	4.75445	5e-05	0.000399594	yes
XLOC_007075	XLOC_007075	Kctd12	chr14:103375797-103381854	KO	WT	OK	30.6409	69.7096	1.1859	5.01158	5e-05	0.000399594	yes
XLOC_007112	XLOC_007112	Ggact	chr14:123290081-123382505	KO	WT	OK	32.859	12.9742	-1.34065	-2.83589	0.00025	0.00166535	yes
XLOC_007116	XLOC_007116	Selenop	chr15:3220766-3253526	KO	WT	OK	8.61265	4.02244	-1.09839	-3.34598	5e-05	0.000399594	yes
XLOC_007132	XLOC_007132	Gdnf	chr15:7760047-7787580	KO	WT	OK	10.714	4.57824	-1.22663	-4.50495	5e-05	0.000399594	yes
XLOC_007198	XLOC_007198	Cthrc1	chr15:38908477-38918667	KO	WT	OK	1.85008	4.22889	1.19269	2.21372	0.0035	0.0152001	yes
XLOC_007262	XLOC_007262	Ptp4a3	chr15:73553574-73589196	KO	WT	OK	114.86	37.1727	-1.62757	-6.87201	5e-05	0.000399594	yes
XLOC_007267	XLOC_007267	Them6	chr15:74551663-74554803	KO	WT	OK	4.75665	19.0326	2.00046	5.9149	5e-05	0.000399594	yes
XLOC_007278	XLOC_007278	Gsdmd	chr15:75692768-75697834	KO	WT	OK	13.7487	5.62348	-1.28976	-4.12909	5e-05	0.000399594	yes
XLOC_007301	XLOC_007301	Gpt	chr15:76527155-76530105	KO	WT	OK	9.65136	0.859263	-3.48956	-6.86103	5e-05	0.000399594	yes
XLOC_007323	XLOC_007323	Pdxp	chr15:78744348-78749947	KO	WT	OK	2.86136	9.87803	1.78752	5.1026	5e-05	0.000399594	yes
XLOC_007326	XLOC_007326	Triobp	chr15:78778153-78841471	KO	WT	OK	20.6192	9.86732	-1.06326	-3.99364	5e-05	0.000399594	yes
XLOC_007395	XLOC_007395	Fbln1	chr15:85036378-85116724	KO	WT	OK	6.82456	18.1573	1.41174	4.93295	5e-05	0.000399594	yes
XLOC_007398	XLOC_007398	Lncppara,Mirlet7b,Mirlet7c-2	chr15:85534202-85537954	KO	WT	OK	4.4679	1.91923	-1.21907	-1.13738	0.0182	0.0563718	no
XLOC_007417	XLOC_007417	Adm2	chr15:89153150-89155161	KO	WT	OK	0.891237	1.7984	1.01283	1.59418	0.0376	0.100029	no
XLOC_007440	XLOC_007440	Slc48a1	chr15:97614795-97674933	KO	WT	OK	117.433	58.345	-1.00916	-3.73411	5e-05	0.000399594	yes
XLOC_007443	XLOC_007443	Ccdc184	chr15:97998236-98000565	KO	WT	OK	3.61152	1.18641	-1.60601	-3.72486	5e-05	0.000399594	yes
XLOC_007456	XLOC_007456	Troap	chr15:98905403-98913840	KO	WT	OK	4.00098	12.034	1.58869	5.33486	5e-05	0.000399594	yes
XLOC_007465	XLOC_007465	Aqp5	chr15:99421458-99425260	KO	WT	OK	1.50496	0.728979	-1.04577	-1.61118	0.0285	0.0805203	no
XLOC_007484	XLOC_007484	Acvrl1	chr15:100958952-100975767	KO	WT	OK	14.5782	2.13392	-2.77223	-8.88544	5e-05	0.000399594	yes
XLOC_007493	XLOC_007493	Krt7	chr15:101242833-101258237	KO	WT	OK	2.18014	0.113254	-4.26679	-3.62749	0.0153	0.0492907	yes
XLOC_007505	XLOC_007505	Espl1	chr15:102126723-102154787	KO	WT	OK	7.70719	20.229	1.39215	5.77271	5e-05	0.000399594	yes
XLOC_007516	XLOC_007516	Hoxc13	chr15:102751561-102759245	KO	WT	OK	6.92331	2.10543	-1.71735	-4.65863	5e-05	0.000399594	yes
XLOC_007523	XLOC_007523	Hoxc6	chr15:102839992-102842312	KO	WT	OK	19.0346	8.52779	-1.15838	-3.96605	5e-05	0.000399594	yes
XLOC_007542	XLOC_007542	Osmr	chr15:6763576-6824313	KO	WT	OK	4.06818	1.6089	-1.33831	-4.12795	5e-05	0.000399594	yes
XLOC_007547	XLOC_007547	Skp2	chr15:9041738-9127206	KO	WT	OK	13.9872	32.9766	1.23733	4.3978	5e-05	0.000399594	yes
XLOC_007556	XLOC_007556	Npr3	chr15:11769650-11837145	KO	WT	OK	1.17485	0.57257	-1.03696	-2.56396	0.00065	0.00373726	yes
XLOC_007564	XLOC_007564	Basp1	chr15:25293031-25343519	KO	WT	OK	7.27607	17.9901	1.30597	4.3603	5e-05	0.000399594	yes
XLOC_007613	XLOC_007613	Angpt1	chr15:42256212-42508523	KO	WT	OK	0.20835	1.43764	2.78662	4.46344	5e-05	0.000399594	yes
XLOC_007628	XLOC_007628	Samd12	chr15:53293355-53733991	KO	WT	OK	1.28284	0.42753	-1.58524	-1.57642	0.03515	0.0949452	no
XLOC_007637	XLOC_007637	Sntb1	chr15:55470708-55738504	KO	WT	OK	1.22678	3.73691	1.60697	3.60228	5e-05	0.000399594	yes
XLOC_007690	XLOC_007690	Arc	chr15:74499510-74503000	KO	WT	OK	0.741023	1.9934	1.42764	3.145	0.0003	0.00192981	yes
XLOC_007691	XLOC_007691	Jrk	chr15:74532841-74540804	KO	WT	OK	0.875721	2.62637	1.58453	4.29241	5e-05	0.000399594	yes
XLOC_007704	XLOC_007704	Ly6a	chr15:74825306-74828461	KO	WT	OK	1.80366	4.31003	1.25677	2.12187	0.00355	0.0153551	yes
XLOC_007705	XLOC_007705	Ly6c1	chr15:74874447-74879267	KO	WT	OK	0.551756	1.31095	1.24851	1.01532	0.0467	0.11865	no
XLOC_007718	XLOC_007718	Fam83h	chr15:75831521-75877411	KO	WT	OK	3.49172	1.58664	-1.13796	-3.35887	5e-05	0.000399594	yes
XLOC_007726	XLOC_007726	Parp10	chr15:76063424-76073870	KO	WT	OK	3.45532	0.865953	-1.99646	-4.76394	5e-05	0.000399594	yes
XLOC_007742	XLOC_007742	Recql4	chr15:76531971-76540989	KO	WT	OK	2.92413	7.66328	1.38996	4.52402	5e-05	0.000399594	yes
XLOC_007745	XLOC_007745	Zfp251	chr15:76682573-76701865	KO	WT	OK	4.12257	8.58135	1.05766	3.69485	5e-05	0.000399594	yes
XLOC_007746	XLOC_007746	Zfp647	chr15:76740799-76755878	KO	WT	OK	1.49573	3.06203	1.03364	2.43143	0.001	0.0052909	yes
XLOC_007775	XLOC_007775	Card10	chr15:78605565-78633472	KO	WT	OK	2.19264	0.549766	-1.99578	-4.70225	5e-05	0.000399594	yes
XLOC_007818	XLOC_007818	Pmm1	chr15:81781535-81791360	KO	WT	OK	164.103	40.4605	-2.02002	-8.20925	5e-05	0.000399594	yes
XLOC_007841	XLOC_007841	A4galt	chr15:83057151-83082159	KO	WT	OK	4.68695	1.69023	-1.47143	-3.61995	5e-05	0.000399594	yes
XLOC_007850	XLOC_007850	Scube1	chr15:83433012-83555469	KO	WT	OK	1.88468	0.0978576	-4.26749	-6.86682	5e-05	0.000399594	yes
XLOC_007852	XLOC_007852	Sult4a1	chr15:83906526-83936184	KO	WT	OK	0.41609	1.39876	1.74918	2.87	0.00065	0.00373726	yes
XLOC_007855	XLOC_007855	Rtl6	chr15:84383827-84388253	KO	WT	OK	5.19411	2.25917	-1.20108	-3.8729	5e-05	0.000399594	yes
XLOC_007877	XLOC_007877	Mapk11	chr15:88972913-88980036	KO	WT	OK	1.13683	3.19503	1.49081	3.45933	0.00015	0.00107374	yes
XLOC_007901	XLOC_007901	Prickle1	chr15:93329541-93426333	KO	WT	OK	2.4307	0.461523	-2.3969	-5.05334	5e-05	0.000399594	yes
XLOC_007918	XLOC_007918	Slc38a4	chr15:96825253-96886387	KO	WT	OK	1.6932	5.88548	1.79741	5.25342	5e-05	0.000399594	yes
XLOC_007964	XLOC_007964	Racgap1	chr15:99450927-99482087	KO	WT	OK	27.5487	75.6938	1.45819	6.065	5e-05	0.000399594	yes
XLOC_007983	XLOC_007983	Krt80	chr15:101178745-101200593	KO	WT	OK	1.0988	2.8311	1.36543	3.39486	5e-05	0.000399594	yes
XLOC_008013	XLOC_008013	Sp7	chr15:102187033-102197399	KO	WT	OK	0.816464	4.10468	2.32981	5.36526	5e-05	0.000399594	yes
XLOC_008021	XLOC_008021	Hotair	chr15:102774492-102778377	KO	WT	OK	0.924101	1.92098	1.05572	2.05845	0.0058	0.0228211	yes
XLOC_008028	XLOC_008028	Zfp385a	chr15:103144325-103170517	KO	WT	OK	21.4328	10.3732	-1.04696	-3.96417	5e-05	0.000399594	yes
XLOC_008069	XLOC_008069	Snn	chr16:11066390-11134625	KO	WT	OK	6.81786	19.6495	1.5271	3.53538	5e-05	0.000399594	yes
XLOC_008116	XLOC_008116	Ccdc74a	chr16:17646562-17650831	KO	WT	OK	1.44133	0.445273	-1.69464	-2.17863	0.00775	0.0287676	yes
XLOC_008129	XLOC_008129	Gnb1l	chr16:18498805-18566773	KO	WT	OK	6.52699	3.09142	-1.07815	-3.60755	5e-05	0.000399594	yes
XLOC_008171	XLOC_008171	St6gal1	chr16:23221596-23360423	KO	WT	OK	2.89927	8.66192	1.57899	5.4491	5e-05	0.000399594	yes
XLOC_008173	XLOC_008173	Rtp4	chr16:23610004-23614308	KO	WT	OK	0.637962	1.59332	1.32049	2.05866	0.0085	0.0310535	yes
XLOC_008189	XLOC_008189	Fam43a	chr16:30599808-30602883	KO	WT	OK	3.43022	1.53821	-1.15705	-2.98893	0.0003	0.00192981	yes
XLOC_008192	XLOC_008192	Gm536	chr16:31618218-31639065	KO	WT	OK	0.958318	2.46488	1.36294	1.72496	0.02505	0.0727942	no
XLOC_008221	XLOC_008221	Itgb5	chr16:33829750-33949424	KO	WT	OK	15.6919	5.34838	-1.55284	-5.66304	5e-05	0.000399594	yes
XLOC_008231	XLOC_008231	Wdr5b	chr16:36041275-36043060	KO	WT	OK	0.860799	2.41193	1.48644	2.67992	0.00115	0.00598527	yes
XLOC_008252	XLOC_008252	Cd80	chr16:38459012-38496040	KO	WT	OK	30.6661	7.79718	-1.97562	-6.86323	5e-05	0.000399594	yes
XLOC_008257	XLOC_008257	Zbtb20	chr16:42884482-43619236	KO	WT	OK	27.2897	11.8361	-1.20516	-4.28078	5e-05	0.000399594	yes
XLOC_008272	XLOC_008272	Ccdc80	chr16:45094123-45128037	KO	WT	OK	2.18307	0.980718	-1.15445	-2.87558	5e-05	0.000399594	yes
XLOC_008284	XLOC_008284	Cip2a	chr16:48994300-49019818	KO	WT	OK	15.9384	45.3447	1.50842	6.11352	5e-05	0.000399594	yes
XLOC_008314	XLOC_008314	Pros1	chr16:62854132-62929168	KO	WT	OK	20.4884	10.2141	-1.00425	-3.88786	5e-05	0.000399594	yes
XLOC_008317	XLOC_008317	Vgll3	chr16:65815433-65866613	KO	WT	OK	78.0432	31.3125	-1.31754	-5.63963	5e-05	0.000399594	yes
XLOC_008340	XLOC_008340	Mir155,Mir155hg	chr16:84713267-84715489	KO	WT	OK	3.49851	1.24446	-1.49121	-0.99304	0.02745	0.0782846	no
XLOC_008341	XLOC_008341	Jam2	chr16:84774367-84826620	KO	WT	OK	6.3176	16.836	1.4141	5.49796	5e-05	0.000399594	yes
XLOC_008363	XLOC_008363	Eva1c	chr16:90826963-90905354	KO	WT	OK	5.32066	2.49524	-1.09243	-2.84549	0.00015	0.00107374	yes
XLOC_008383	XLOC_008383	Dop1b	chr16:93712151-93810833	KO	WT	OK	4.57428	2.22013	-1.0429	-3.58272	5e-05	0.000399594	yes
XLOC_008409	XLOC_008409	Srl	chr16:4480211-4523066	KO	WT	OK	2.18663	8.67047	1.9874	6.24095	5e-05	0.000399594	yes
XLOC_008413	XLOC_008413	Nmral1	chr16:4711317-4719356	KO	WT	OK	6.93884	18.8731	1.44357	4.62153	5e-05	0.000399594	yes
XLOC_008472	XLOC_008472	2610318N02Rik	chr16:17113490-17125295	KO	WT	OK	0.165616	1.4945	3.17375	2.30587	0.00685	0.0260578	yes
XLOC_008516	XLOC_008516	Gm15760	chr16:20545184-20548629	KO	WT	OK	0.522802	1.33306	1.3504	2.68097	0.00105	0.00552326	yes
XLOC_008547	XLOC_008547	P3h2	chr16:25959369-26105899	KO	WT	OK	21.8648	6.24314	-1.80827	-6.7904	5e-05	0.000399594	yes
XLOC_008649	XLOC_008649	Gm4737	chr16:46153105-46155190	KO	WT	OK	0.767389	1.53575	1.00091	1.80257	0.0145	0.047216	yes
XLOC_008660	XLOC_008660	Alcam	chr16:52249108-52453194	KO	WT	OK	1.69314	10.1022	2.5769	8.20147	5e-05	0.000399594	yes
XLOC_008671	XLOC_008671	Tmem45a	chr16:56805273-56886276	KO	WT	OK	1.31136	0.60504	-1.11596	-1.9786	0.00785	0.0290931	yes
XLOC_008796	XLOC_008796	Runx1	chr16:92601710-92826319	KO	WT	OK	101.885	44.2388	-1.20356	-5.05497	5e-05	0.000399594	yes
XLOC_008810	XLOC_008810	Brwd1	chr16:96213698-96304035	KO	WT	OK	33.9784	15.3728	-1.14424	-3.55766	5e-05	0.000399594	yes
XLOC_008830	XLOC_008830	Zdhhc14	chr17:5492599-5753891	KO	WT	OK	1.94849	0.830321	-1.23062	-2.63386	0.00095	0.00508332	yes
XLOC_008843	XLOC_008843	Rnaset2b	chr17:7183208-7202542	KO	WT	OK	39.2368	15.9741	-1.29647	-4.46349	5e-05	0.000399594	yes
XLOC_008883	XLOC_008883	9030025P20Rik	chr17:15115827-15128541	KO	WT	OK	1.06558	0.462894	-1.20289	-1.6836	0.02185	0.0650978	no
XLOC_008955	XLOC_008955	Hcfc1r1	chr17:23797472-23814416	KO	WT	OK	92.9895	35.3502	-1.39535	-2.14129	0.00345	0.0150051	yes
XLOC_008957	XLOC_008957	Pkmyt1	chr17:23863302-23877297	KO	WT	OK	11.3504	23.8468	1.07104	3.37252	5e-05	0.000399594	yes
XLOC_008968	XLOC_008968	Abca3	chr17:24488967-24551458	KO	WT	OK	4.56725	2.18816	-1.06161	-3.64471	5e-05	0.000399594	yes
XLOC_008974	XLOC_008974	Rab26os	chr17:24665195-24665689	KO	WT	OK	93.4441	35.9153	-1.37951	-2.94003	0.00035	0.00220107	yes
XLOC_008983	XLOC_008983	Hs3st6	chr17:24889932-24895629	KO	WT	OK	1.23682	0.165061	-2.90557	-1.73557	0.0156	0.0499979	yes
XLOC_008995	XLOC_008995	Unkl	chr17:25325341-25377085	KO	WT	OK	4.50046	2.19853	-1.03353	-2.48979	0.001	0.0052909	yes
XLOC_009026	XLOC_009026	Crebrf	chr17:26852594-26913571	KO	WT	OK	2.66913	1.08769	-1.2951	-3.93231	5e-05	0.000399594	yes
XLOC_009032	XLOC_009032	Syngap1	chr17:27078194-27109379	KO	WT	OK	3.66582	1.30691	-1.48797	-4.7433	5e-05	0.000399594	yes
XLOC_009047	XLOC_009047	Def6	chr17:28264295-28438414	KO	WT	OK	21.0922	8.82758	-1.25662	-2.588	0.00025	0.00166535	yes
XLOC_009056	XLOC_009056	Mapk13	chr17:28906261-28915649	KO	WT	OK	45.2449	8.08613	-2.48423	-8.42717	5e-05	0.000399594	yes
XLOC_009067	XLOC_009067	Pim1	chr17:29627729-29633055	KO	WT	OK	14.6167	6.12154	-1.25565	-4.40989	5e-05	0.000399594	yes
XLOC_009075	XLOC_009075	Abcg1	chr17:31194638-31254926	KO	WT	OK	3.75266	0.278106	-3.75421	-7.91176	5e-05	0.000399594	yes
XLOC_009087	XLOC_009087	Cyp4f17	chr17:32643428-32667099	KO	WT	OK	4.55025	1.81035	-1.32968	-3.64186	5e-05	0.000399594	yes
XLOC_009094	XLOC_009094	Zfp563	chr17:33226311-33247649	KO	WT	OK	1.48309	0.696887	-1.08961	-2.70937	0.00015	0.00107374	yes
XLOC_009104	XLOC_009104	Kank3	chr17:33947467-33959862	KO	WT	OK	8.90231	2.63792	-1.75478	-3.63459	5e-05	0.000399594	yes
XLOC_009110	XLOC_009110	Tapbp	chr17:34056422-34066235	KO	WT	OK	17.1061	7.01314	-1.28638	-4.69293	5e-05	0.000399594	yes
XLOC_009122	XLOC_009122	Tap1	chr17:34324500-34334170	KO	WT	OK	35.4837	14.7127	-1.27009	-5.10126	5e-05	0.000399594	yes
XLOC_009123	XLOC_009123	Psmb8	chr17:34335139-34338399	KO	WT	OK	16.5876	5.382	-1.62389	-4.58114	5e-05	0.000399594	yes
XLOC_009124	XLOC_009124	Tap2	chr17:34341423-34353266	KO	WT	OK	101.551	48.9677	-1.0523	-4.45301	5e-05	0.000399594	yes
XLOC_009133	XLOC_009133	Gpsm3	chr17:34726750-34728699	KO	WT	OK	4.32913	2.01674	-1.10205	-2.45401	0.00145	0.00728642	yes
XLOC_009147	XLOC_009147	Hspa1l	chr17:35109647-35116173	KO	WT	OK	0.970616	2.08998	1.10652	2.34635	0.00265	0.0120775	yes
XLOC_009152	XLOC_009152	Ddah2	chr17:35195979-35199044	KO	WT	OK	24.9598	54.46	1.12559	4.35992	5e-05	0.000399594	yes
XLOC_009256	XLOC_009256	B230354K17Rik	chr17:45570779-45579493	KO	WT	OK	2.86083	6.61835	1.21004	4.0551	5e-05	0.000399594	yes
XLOC_009305	XLOC_009305	Btg3	chr17:50838005-50839209	KO	WT	OK	4.88754	1.87012	-1.38598	-2.66845	0.00095	0.00508332	yes
XLOC_009320	XLOC_009320	Chaf1a	chr17:56179838-56207449	KO	WT	OK	18.7085	39.0277	1.06081	4.41182	5e-05	0.000399594	yes
XLOC_009326	XLOC_009326	Uhrf1	chr17:56442759-56462909	KO	WT	OK	55.8862	114.871	1.03946	4.41702	5e-05	0.000399594	yes
XLOC_009352	XLOC_009352	Ddx11	chr17:66472859-66501514	KO	WT	OK	3.27936	9.39556	1.51856	5.37965	5e-05	0.000399594	yes
XLOC_009371	XLOC_009371	Lbh	chr17:73267644-73291286	KO	WT	OK	36.9837	96.2517	1.37992	5.81011	5e-05	0.000399594	yes
XLOC_009382	XLOC_009382	Crim1	chr17:78599587-78817492	KO	WT	OK	21.3957	9.61671	-1.1537	-4.10798	5e-05	0.000399594	yes
XLOC_009392	XLOC_009392	Morn2	chr17:80637643-80696816	KO	WT	OK	16.5104	7.50763	-1.13695	-1.55043	0.0363	0.0972283	no
XLOC_009428	XLOC_009428	Pisd-ps2	chr17:3064317-3084183	KO	WT	OK	2.14746	0.864272	-1.31307	-2.24281	0.0045	0.0185727	yes
XLOC_009445	XLOC_009445	Rsph3b	chr17:7109064-7152705	KO	WT	OK	5.62766	2.41305	-1.22168	-3.05087	5e-05	0.000399594	yes
XLOC_009451	XLOC_009451	Rnaset2a,Rnaset2b	chr17:8321444-8341111	KO	WT	OK	45.758	22.1152	-1.04899	-3.72941	5e-05	0.000399594	yes
XLOC_009477	XLOC_009477	Thbs2	chr17:14802506-14831269	KO	WT	OK	26.6178	8.87269	-1.58495	-6.50633	5e-05	0.000399594	yes
XLOC_009488	XLOC_009488	Prdm9	chr17:15680035-15701318	KO	WT	OK	2.00196	0.902472	-1.14946	-2.56696	0.0008	0.00440859	yes
XLOC_009542	XLOC_009542	Ccnf,Mir5134	chr17:24360176-24388354	KO	WT	OK	15.8031	37.5632	1.24911	4.75509	5e-05	0.000399594	yes
XLOC_009555	XLOC_009555	Gfer	chr17:24830135-24833101	KO	WT	OK	52.4174	23.8986	-1.13312	-4.49216	5e-05	0.000399594	yes
XLOC_009563	XLOC_009563	Eme2	chr17:25029096-25032032	KO	WT	OK	1.4512	3.95715	1.44721	3.03923	0.0002	0.00138545	yes
XLOC_009578	XLOC_009578	Chtf18	chr17:25854116-25864360	KO	WT	OK	6.57065	14.8857	1.17982	4.37435	5e-05	0.000399594	yes
XLOC_009588	XLOC_009588	Wfikkn1	chr17:26014572-26017803	KO	WT	OK	1.47473	0.374735	-1.97651	-3.20978	0.0002	0.00138545	yes
XLOC_009612	XLOC_009612	AI413582	chr17:27700713-27702672	KO	WT	OK	42.2512	19.3428	-1.1272	-3.32634	5e-05	0.000399594	yes
XLOC_009630	XLOC_009630	Trp53cor1	chr17:29194418-29216071	KO	WT	OK	0.413778	1.23906	1.58232	2.85444	0.00055	0.00324124	yes
XLOC_009651	XLOC_009651	Hsf2bp	chr17:32081713-32171453	KO	WT	OK	0.400528	1.14311	1.51298	2.46015	0.0022	0.0102725	yes
XLOC_009687	XLOC_009687	H2-K1	chr17:34132956-34137292	KO	WT	OK	89.7014	41.7051	-1.10491	-4.53006	5e-05	0.000399594	yes
XLOC_009694	XLOC_009694	Psmb9	chr17:34319043-34324275	KO	WT	OK	9.77618	4.54281	-1.10569	-2.3962	0.00175	0.00855717	yes
XLOC_009717	XLOC_009717	D17H6S56E-5	chr17:35133668-35137691	KO	WT	OK	50.6436	139.165	1.45834	6.15756	5e-05	0.000399594	yes
XLOC_009718	XLOC_009718	Sapcd1	chr17:35153523-35164961	KO	WT	OK	0.435912	4.68885	3.42712	2.65178	0.00935	0.0334548	yes
XLOC_009744	XLOC_009744	H2-T24	chr17:36131448-36179687	KO	WT	OK	4.25527	0.897363	-2.24549	-2.85715	0.0018	0.00871501	yes
XLOC_009745	XLOC_009745	H2-T23	chr17:36131448-36179687	KO	WT	OK	4.2626	1.22615	-1.7976	-2.01826	0.01225	0.0413849	yes
XLOC_009746	XLOC_009746	H2-T22	chr17:36131448-36179687	KO	WT	OK	13.3295	6.56276	-1.02225	-2.92831	5e-05	0.000399594	yes
XLOC_009750	XLOC_009750	H2-T10	chr17:36252815-36258389	KO	WT	OK	0.240202	1.18795	2.30615	3.29737	0.0005	0.00298533	yes
XLOC_009820	XLOC_009820	Slc29a1	chr17:45722148-45736552	KO	WT	OK	45.0051	117.79	1.38806	5.70448	5e-05	0.000399594	yes
XLOC_009821	XLOC_009821	Mymx	chr17:45737915-45739051	KO	WT	OK	0.224198	1.1847	2.40167	1.41131	0.0392	0.103262	no
XLOC_009835	XLOC_009835	Cul9	chr17:46637557-46683337	KO	WT	OK	3.55713	1.20156	-1.5658	-5.11854	5e-05	0.000399594	yes
XLOC_009867	XLOC_009867	Rftn1	chr17:50132631-50329822	KO	WT	OK	17.6575	8.44738	-1.06371	-4.00799	5e-05	0.000399594	yes
XLOC_009892	XLOC_009892	Sema6b	chr17:56262507-56279766	KO	WT	OK	1.38696	5.16028	1.89552	5.34473	5e-05	0.000399594	yes
XLOC_009901	XLOC_009901	Gm20219	chr17:56690836-56693810	KO	WT	OK	1.79279	0.558157	-1.68347	-2.35621	0.0057	0.0225026	yes
XLOC_009905	XLOC_009905	Vmac	chr17:56853354-56857122	KO	WT	OK	6.18013	2.49459	-1.30883	-3.57921	5e-05	0.000399594	yes
XLOC_009940	XLOC_009940	Ankrd12	chr17:66316840-66426386	KO	WT	OK	11.4832	2.08738	-2.45975	-9.34418	5e-05	0.000399594	yes
XLOC_009953	XLOC_009953	Myl12b	chr17:71323302-71339856	KO	WT	OK	40.4204	16.6434	-1.28013	-4.38557	5e-05	0.000399594	yes
XLOC_009958	XLOC_009958	Ndc80	chr17:71845439-71876197	KO	WT	OK	11.2946	23.1082	1.03277	3.85555	5e-05	0.000399594	yes
XLOC_009975	XLOC_009975	Cebpz	chr17:79315838-79336410	KO	WT	OK	6.23878	30.3808	2.28383	8.09646	5e-05	0.000399594	yes
XLOC_009977	XLOC_009977	Cdc42ep3	chr17:79733064-79754431	KO	WT	OK	2.16327	6.37439	1.55908	4.14521	5e-05	0.000399594	yes
XLOC_010108	XLOC_010108	Kif20a	chr18:34758268-34811390	KO	WT	OK	20.4799	62.9872	1.62085	4.20128	5e-05	0.000399594	yes
XLOC_010111	XLOC_010111	Reep2	chr18:35000242-35007117	KO	WT	OK	14.67	5.99464	-1.29113	-4.35785	5e-05	0.000399594	yes
XLOC_010114	XLOC_010114	Snhg4	chr18:35713063-35717970	KO	WT	OK	85.9208	38.4531	-1.15991	-4.53193	5e-05	0.000399594	yes
XLOC_010138	XLOC_010138	Gm37013,Gm38666,Gm38667,Pcdha1,Pcdha10,Pcdha11,Pcdha12,Pcdha2,Pcdha3,Pcdha4,Pcdha5,Pcdha6,Pcdha7,Pcdha8,Pcdha9,Pcdhac1,Pcdhac2,Pcdhga1,Pcdhga10,Pcdhga11,Pcdhga12,Pcdhga2,Pcdhga3,Pcdhga4,Pcdhga5,Pcdhga6,Pcdhga7,Pcdhga8,Pcdhga9,Pcdhgb1,Pcdhgb2,Pcdhgb4,Pcdhgb5,Pcdhgb6,Pcdhgb7,Pcdhgb8,Pcdhgc3,Pcdhgc4,Pcdhgc5	chr18:37089938-38001526	KO	WT	OK	56.3882	139.916	1.3111	5.34926	5e-05	0.000399594	yes
XLOC_010219	XLOC_010219	Lmnb1	chr18:56867466-56913079	KO	WT	OK	37.5592	118.599	1.65885	7.01442	5e-05	0.000399594	yes
XLOC_010257	XLOC_010257	Apcdd1	chr18:63081980-63113468	KO	WT	OK	0.575977	1.23778	1.10367	2.20009	0.00345	0.0150051	yes
XLOC_010280	XLOC_010280	Ldlrad4	chr18:68092826-68415203	KO	WT	OK	8.20745	3.80151	-1.11036	-3.518	5e-05	0.000399594	yes
XLOC_010303	XLOC_010303	Smad7	chr18:75527018-75555588	KO	WT	OK	49.4987	23.6594	-1.06498	-4.46686	5e-05	0.000399594	yes
XLOC_010340	XLOC_010340	Map3k8	chr18:4331324-4352951	KO	WT	OK	1.32227	0.526125	-1.32954	-2.29561	0.00315	0.0139679	yes
XLOC_010366	XLOC_010366	Zfp521	chr18:13845522-14131242	KO	WT	OK	1.97715	4.47161	1.17737	4.00465	5e-05	0.000399594	yes
XLOC_010393	XLOC_010393	Celf4	chr18:25636120-25912658	KO	WT	OK	4.20254	8.49537	1.01541	3.43247	5e-05	0.000399594	yes
XLOC_010407	XLOC_010407	Stard4	chr18:33358791-33373516	KO	WT	OK	2.1876	5.72375	1.38761	4.56974	5e-05	0.000399594	yes
XLOC_010413	XLOC_010413	Nme5	chr18:34722287-34738769	KO	WT	OK	1.73822	0.472086	-1.88049	-1.70367	0.0362	0.0970265	no
XLOC_010418	XLOC_010418	Cdc25c	chr18:34892648-34911187	KO	WT	OK	2.44583	10.2881	2.07257	5.63456	5e-05	0.000399594	yes
XLOC_010436	XLOC_010436	Cd14	chr18:36884717-36886469	KO	WT	OK	5.72594	2.50633	-1.19193	-2.92742	0.00025	0.00166535	yes
XLOC_010461	XLOC_010461	Gm4013	chr18:42434033-42434851	KO	WT	OK	14.6838	2.99386	-2.29415	-3.03228	0.00105	0.00552326	yes
XLOC_010464	XLOC_010464	Dpysl3	chr18:43480632-43597940	KO	WT	OK	15.3369	64.5905	2.07431	8.69746	5e-05	0.000399594	yes
XLOC_010471	XLOC_010471	Mcc	chr18:44584713-44971836	KO	WT	OK	5.28887	1.17681	-2.16808	-7.14054	5e-05	0.000399594	yes
XLOC_010473	XLOC_010473	Trim36	chr18:46324953-46372261	KO	WT	OK	0.57328	1.25394	1.12916	2.37904	0.0013	0.00666024	yes
XLOC_010493	XLOC_010493	Marchf3	chr18:56921369-57085169	KO	WT	OK	6.19246	2.36888	-1.38631	-3.38785	5e-05	0.000399594	yes
XLOC_010520	XLOC_010520	Ablim3	chr18:61959045-62071506	KO	WT	OK	1.19901	0.288785	-2.05378	-3.68883	5e-05	0.000399594	yes
XLOC_010553	XLOC_010553	Dynap	chr18:70400082-70404238	KO	WT	OK	0.498494	13.973	4.80892	6.86536	5e-05	0.000399594	yes
XLOC_010561	XLOC_010561	Ska1	chr18:74354952-74367472	KO	WT	OK	2.28734	6.62298	1.53381	4.26995	5e-05	0.000399594	yes
XLOC_010567	XLOC_010567	Gm20544	chr18:75518292-75526742	KO	WT	OK	2.33697	7.87363	1.75239	5.23857	5e-05	0.000399594	yes
XLOC_010610	XLOC_010610	Unc93b1	chr19:3935185-3949340	KO	WT	OK	39.951	13.7377	-1.54009	-5.96437	5e-05	0.000399594	yes
XLOC_010613	XLOC_010613	Acy3	chr19:3986569-3990005	KO	WT	OK	3.1582	1.57416	-1.00452	-1.89231	0.00775	0.0287676	yes
XLOC_010616	XLOC_010616	Doc2g	chr19:4003384-4007005	KO	WT	OK	2.4036	1.18761	-1.01713	-1.8328	0.0126	0.042217	yes
XLOC_010625	XLOC_010625	Clcf1,Gm45928,Pold4	chr19:4214237-4233634	KO	WT	OK	231.189	95.7898	-1.27113	-4.61492	5e-05	0.000399594	yes
XLOC_010627	XLOC_010627	Pcx	chr19:4510471-4621752	KO	WT	OK	12.6638	3.15438	-2.00528	-3.72353	5e-05	0.000399594	yes
XLOC_010634	XLOC_010634	Slc29a2	chr19:5024005-5031972	KO	WT	OK	5.25514	14.4605	1.46031	5.04685	5e-05	0.000399594	yes
XLOC_010678	XLOC_010678	Pygm	chr19:6384407-6398464	KO	WT	OK	17.9644	4.54543	-1.98265	-6.93396	5e-05	0.000399594	yes
XLOC_010686	XLOC_010686	Rcor2	chr19:7341883-7349715	KO	WT	OK	5.11906	11.9056	1.21769	4.10448	5e-05	0.000399594	yes
XLOC_010688	XLOC_010688	2700081O15Rik	chr19:7492114-7557781	KO	WT	OK	6.6348	15.8526	1.25659	2.40842	0.00095	0.00508332	yes
XLOC_010691	XLOC_010691	Plaat3	chr19:7631948-7663035	KO	WT	OK	6.06543	2.97407	-1.02817	-3.31948	5e-05	0.000399594	yes
XLOC_010707	XLOC_010707	Bscl2	chr19:8911418-8923173	KO	WT	OK	31.0436	9.7718	-1.6676	-5.71296	5e-05	0.000399594	yes
XLOC_010722	XLOC_010722	Fads1	chr19:10257377-10271362	KO	WT	OK	13.3832	26.9315	1.00887	4.07691	5e-05	0.000399594	yes
XLOC_010803	XLOC_010803	Aldh1a1,E030003E18Rik	chr19:20567072-20717953	KO	WT	OK	3.2153	0.921486	-1.80292	-3.47422	5e-05	0.000399594	yes
XLOC_010844	XLOC_010844	2700046G09Rik	chr19:32463705-32465674	KO	WT	OK	1.49984	0.343893	-2.12477	-2.69092	0.0028	0.0126439	yes
XLOC_010854	XLOC_010854	Fas	chr19:34365148-34402260	KO	WT	OK	13.4994	1.90152	-2.82768	-5.75406	5e-05	0.000399594	yes
XLOC_010858	XLOC_010858	Ifit1	chr19:34715378-34724499	KO	WT	OK	0.622386	1.86804	1.58564	2.80344	0.00065	0.00373726	yes
XLOC_010859	XLOC_010859	Kif20b	chr19:34996847-35050240	KO	WT	OK	4.90219	12.8206	1.38697	5.17307	5e-05	0.000399594	yes
XLOC_010868	XLOC_010868	Kif11	chr19:37450871-37496353	KO	WT	OK	14.6355	40.7407	1.477	6.02617	5e-05	0.000399594	yes
XLOC_010874	XLOC_010874	Cep55	chr19:38129473-38148915	KO	WT	OK	11.4286	32.4037	1.50351	5.82318	5e-05	0.000399594	yes
XLOC_010878	XLOC_010878	Slc35g1	chr19:38470469-38480097	KO	WT	OK	2.3515	5.01543	1.09279	3.24791	5e-05	0.000399594	yes
XLOC_010880	XLOC_010880	Tbc1d12	chr19:38911068-38994158	KO	WT	OK	7.29262	3.552	-1.03781	-3.48828	5e-05	0.000399594	yes
XLOC_010893	XLOC_010893	Mir8092,Zfp518a	chr19:40969192-40992437	KO	WT	OK	10.2782	3.19235	-1.68689	-3.48887	5e-05	0.000399594	yes
XLOC_010900	XLOC_010900	Zdhhc16	chr19:42007934-42055626	KO	WT	OK	15.1919	30.7392	1.01678	2.28039	0.0025	0.0115004	yes
XLOC_010925	XLOC_010925	Sema4g	chr19:45063833-45077885	KO	WT	OK	1.52532	0.281255	-2.43916	-4.55588	5e-05	0.000399594	yes
XLOC_010948	XLOC_010948	As3mt	chr19:46781947-46815585	KO	WT	OK	7.52501	3.48833	-1.10915	-3.10823	5e-05	0.000399594	yes
XLOC_010969	XLOC_010969	Pdcd4	chr19:53966720-54107768	KO	WT	OK	20.4021	7.75773	-1.39501	-2.21439	0.00475	0.0193943	yes
XLOC_010999	XLOC_010999	Slc18a2	chr19:59335367-59370502	KO	WT	OK	0.46313	1.01182	1.12746	2.0305	0.0067	0.0256276	yes
XLOC_011008	XLOC_011008	Gal	chr19:3409914-3414544	KO	WT	OK	89.776	423.23	2.23704	9.26225	5e-05	0.000399594	yes
XLOC_011039	XLOC_011039	Actn3	chr19:4861215-4877909	KO	WT	OK	2.39688	11.1972	2.22391	6.94849	5e-05	0.000399594	yes
XLOC_011056	XLOC_011056	Ctsw	chr19:5460606-5468507	KO	WT	OK	4.2516	1.38169	-1.62157	-1.8455	0.01315	0.0436755	yes
XLOC_011069	XLOC_011069	Malat1	chr19:5795689-5802672	KO	WT	OK	288.799	81.9471	-1.8173	-7.54674	5e-05	0.000399594	yes
XLOC_011128	XLOC_011128	Incenp	chr19:9946784-9973979	KO	WT	OK	23.7902	63.6206	1.41913	5.95277	5e-05	0.000399594	yes
XLOC_011130	XLOC_011130	Fads2	chr19:10137254-10175993	KO	WT	OK	4.21118	9.96388	1.24248	4.20483	5e-05	0.000399594	yes
XLOC_011199	XLOC_011199	Psat1	chr19:15979612-15999549	KO	WT	OK	100.382	218.671	1.12326	4.79329	5e-05	0.000399594	yes
XLOC_011218	XLOC_011218	Tjp2	chr19:24168985-24299618	KO	WT	OK	8.03182	17.1745	1.09647	4.40385	5e-05	0.000399594	yes
XLOC_011222	XLOC_011222	Pgm5	chr19:24748497-24936332	KO	WT	OK	3.14077	0.694869	-2.1763	-6.35409	5e-05	0.000399594	yes
XLOC_011249	XLOC_011249	Rnls	chr19:33212229-33466785	KO	WT	OK	1.78622	0.867318	-1.04228	-1.72016	0.0178	0.0554383	no
XLOC_011251	XLOC_011251	Lipo3	chr19:33629649-33664801	KO	WT	OK	9.7138	3.82293	-1.34535	-4.36257	5e-05	0.000399594	yes
XLOC_011256	XLOC_011256	Acta2	chr19:34314825-34329863	KO	WT	OK	25.6173	97.6077	1.92988	7.94882	5e-05	0.000399594	yes
XLOC_011269	XLOC_011269	Fgfbp3	chr19:36992039-36994089	KO	WT	OK	22.6844	4.09508	-2.46974	-7.33527	5e-05	0.000399594	yes
XLOC_011295	XLOC_011295	Arhgap19	chr19:41841077-41876574	KO	WT	OK	3.85637	9.89294	1.35916	4.95105	5e-05	0.000399594	yes
XLOC_011372	XLOC_011372	Afap1l2	chr19:56986843-57083065	KO	WT	OK	1.0894	0.1705	-2.67569	-3.8527	5e-05	0.000399594	yes
XLOC_011373	XLOC_011373	Ablim1	chr19:57107222-57389409	KO	WT	OK	17.1751	4.10211	-2.06588	-7.97975	5e-05	0.000399594	yes
XLOC_011393	XLOC_011393	Csf2ra	chr19:61300304-61304321	KO	WT	OK	4.921	1.26312	-1.96196	-4.15924	5e-05	0.000399594	yes
XLOC_011508	XLOC_011508	Plxdc2	chr2:16277930-16677466	KO	WT	OK	22.2503	7.20507	-1.62674	-6.66314	5e-05	0.000399594	yes
XLOC_011551	XLOC_011551	Tmem203	chr2:25110958-25111872	KO	WT	OK	36.0105	12.6953	-1.50412	-4.60609	5e-05	0.000399594	yes
XLOC_011557	XLOC_011557	Sapcd2	chr2:25227554-25233733	KO	WT	OK	0.91315	5.34925	2.55041	6.41682	5e-05	0.000399594	yes
XLOC_011615	XLOC_011615	Cercam	chr2:29725013-29738360	KO	WT	OK	10.2814	2.89787	-1.82697	-5.71392	5e-05	0.000399594	yes
XLOC_011625	XLOC_011625	Phyhd1	chr2:30121722-30137669	KO	WT	OK	3.29381	1.4354	-1.19831	-2.26669	0.0029	0.0130307	yes
XLOC_011638	XLOC_011638	Hmcn2	chr2:31169851-31316258	KO	WT	OK	7.6417	2.75183	-1.4735	-6.02016	5e-05	0.000399594	yes
XLOC_011662	XLOC_011662	Ak1	chr2:32477277-32490578	KO	WT	OK	121.346	48.3142	-1.32861	-5.55497	5e-05	0.000399594	yes
XLOC_011663	XLOC_011663	Eng	chr2:32502114-32549695	KO	WT	OK	27.8756	8.3956	-1.7313	-4.75452	5e-05	0.000399594	yes
XLOC_011676	XLOC_011676	Cutal	chr2:34729915-34747653	KO	WT	OK	1.28078	0.174288	-2.87747	-3.28153	0.001	0.0052909	yes
XLOC_011678	XLOC_011678	Gsn	chr2:35111878-35163422	KO	WT	OK	113.39	38.5526	-1.55639	-6.53261	5e-05	0.000399594	yes
XLOC_011683	XLOC_011683	Ptgs1	chr2:36085945-36107791	KO	WT	OK	3.44853	12.5865	1.86783	6.1749	5e-05	0.000399594	yes
XLOC_011724	XLOC_011724	Lypd6	chr2:49921948-50049089	KO	WT	OK	0.32067	1.09015	1.76536	2.87901	0.0007	0.00397059	yes
XLOC_011768	XLOC_011768	Klhl41	chr2:69508176-69522296	KO	WT	OK	0.247249	1.33438	2.43214	3.25283	0.00085	0.00464294	yes
XLOC_011771	XLOC_011771	Klhl23	chr2:69659997-69674708	KO	WT	OK	3.06123	6.72634	1.13571	3.80769	5e-05	0.000399594	yes
XLOC_011793	XLOC_011793	Sp9	chr2:73109982-73113828	KO	WT	OK	2.21462	0.49404	-2.16436	-3.89796	0.0001	0.000747562	yes
XLOC_011831	XLOC_011831	Fam171b	chr2:83652768-83723691	KO	WT	OK	0.598086	1.20074	1.0055	2.3705	0.0012	0.00620447	yes
XLOC_011837	XLOC_011837	Slc43a1	chr2:84679564-84703743	KO	WT	OK	2.99675	6.71983	1.16503	3.45042	5e-05	0.000399594	yes
XLOC_011924	XLOC_011924	Agbl2	chr2:90622883-90674594	KO	WT	OK	1.60025	0.406083	-1.97845	-3.63831	5e-05	0.000399594	yes
XLOC_011934	XLOC_011934	A330069E16Rik	chr2:91077302-91078514	KO	WT	OK	2.90749	1.06566	-1.44803	-2.00827	0.0106	0.0369529	yes
XLOC_011952	XLOC_011952	Syt13	chr2:92755257-92796208	KO	WT	OK	6.06032	2.81794	-1.10475	-3.59444	5e-05	0.000399594	yes
XLOC_011960	XLOC_011960	2810002D19Rik	chr2:94246863-94251837	KO	WT	OK	8.77368	4.37314	-1.00451	-2.69091	0.00035	0.00220107	yes
XLOC_011974	XLOC_011974	Cd59a	chr2:103935957-103955567	KO	WT	OK	1.45569	0.388713	-1.90492	-2.57578	0.0018	0.00871501	yes
XLOC_011987	XLOC_011987	Bdnf	chr2:109514856-109567200	KO	WT	OK	2.09904	0.894723	-1.23022	-2.76336	5e-05	0.000399594	yes
XLOC_012032	XLOC_012032	Bub1b	chr2:118423946-118467328	KO	WT	OK	16.809	45.9213	1.44993	5.9976	5e-05	0.000399594	yes
XLOC_012033	XLOC_012033	Pak6	chr2:118489312-118523756	KO	WT	OK	2.0088	0.315875	-2.66891	-5.07286	5e-05	0.000399594	yes
XLOC_012037	XLOC_012037	Knstrn	chr2:118639738-118661948	KO	WT	OK	8.54524	29.4177	1.78349	6.87229	5e-05	0.000399594	yes
XLOC_012044	XLOC_012044	Gchfr	chr2:118993523-118998125	KO	WT	OK	9.42057	3.52533	-1.41806	-2.55749	0.0015	0.00750254	yes
XLOC_012050	XLOC_012050	Chac1	chr2:119176977-119180062	KO	WT	OK	2.75588	7.12484	1.37035	3.52383	5e-05	0.000399594	yes
XLOC_012053	XLOC_012053	Nusap1	chr2:119435267-119475896	KO	WT	OK	11.6831	23.9679	1.03668	3.64018	5e-05	0.000399594	yes
XLOC_012065	XLOC_012065	Stard9	chr2:120454856-120541617	KO	WT	OK	1.82574	0.753684	-1.27645	-4.39217	5e-05	0.000399594	yes
XLOC_012072	XLOC_012072	Ckmt1	chr2:121183511-121206676	KO	WT	OK	1.14823	0.162739	-2.81878	-2.40214	0.00665	0.0254611	yes
XLOC_012089	XLOC_012089	AA467197,Mir147	chr2:122463622-122466812	KO	WT	OK	32.7199	9.21829	-1.8276	-4.33966	5e-05	0.000399594	yes
XLOC_012091	XLOC_012091	Sqor	chr2:122591094-122635287	KO	WT	OK	8.45707	3.6258	-1.22186	-3.40416	5e-05	0.000399594	yes
XLOC_012096	XLOC_012096	Dut	chr2:125072983-125084785	KO	WT	OK	29.737	68.3288	1.20023	4.98244	5e-05	0.000399594	yes
XLOC_012108	XLOC_012108	Dusp2	chr2:127161894-127164113	KO	WT	OK	3.69863	7.90296	1.0954	2.99705	5e-05	0.000399594	yes
XLOC_012122	XLOC_012122	Chchd5	chr2:128955435-128959847	KO	WT	OK	23.5826	11.4863	-1.03781	-3.52662	5e-05	0.000399594	yes
XLOC_012161	XLOC_012161	Bmp2	chr2:133377894-133388632	KO	WT	OK	1.14898	0.43361	-1.40588	-2.60141	0.00145	0.00728642	yes
XLOC_012249	XLOC_012249	Tpx2	chr2:152673699-152721057	KO	WT	OK	22.0778	62.4883	1.50099	6.25753	5e-05	0.000399594	yes
XLOC_012252	XLOC_012252	Ttll9	chr2:152788220-152834218	KO	WT	OK	1.22102	0.37431	-1.70578	-2.00455	0.0027	0.012258	yes
XLOC_012302	XLOC_012302	Myl9	chr2:156601199-156607393	KO	WT	OK	23.3074	48.421	1.05484	3.95661	5e-05	0.000399594	yes
XLOC_012323	XLOC_012323	Fam83d	chr2:158593834-158612373	KO	WT	OK	7.94074	26.3272	1.72921	6.33474	5e-05	0.000399594	yes
XLOC_012334	XLOC_012334	Sgk2	chr2:162813216-162839875	KO	WT	OK	0.396729	1.16076	1.54884	2.40718	0.00265	0.0120775	yes
XLOC_012336	XLOC_012336	Mybl2	chr2:162880370-162910423	KO	WT	OK	10.6678	34.4884	1.69285	6.84205	5e-05	0.000399594	yes
XLOC_012338	XLOC_012338	Tox2	chr2:163028862-163149908	KO	WT	OK	4.37287	9.69864	1.1492	3.87013	5e-05	0.000399594	yes
XLOC_012339	XLOC_012339	2900093K20Rik	chr2:163245506-163246097	KO	WT	OK	7.08342	2.34524	-1.59471	-2.36973	0.00425	0.0177457	yes
XLOC_012342	XLOC_012342	R3hdml	chr2:163318053-163398643	KO	WT	OK	1.28244	2.91544	1.18482	1.92344	0.0087	0.0316764	yes
XLOC_012357	XLOC_012357	Dbndd2	chr2:164311639-164318823	KO	WT	OK	3.91357	1.92129	-1.02641	-3.02109	5e-05	0.000399594	yes
XLOC_012367	XLOC_012367	Ube2c	chr2:164595428-164598402	KO	WT	OK	75.7343	235.143	1.63452	6.80089	5e-05	0.000399594	yes
XLOC_012373	XLOC_012373	Mmp9	chr2:164773718-164781350	KO	WT	OK	4.8644	0.164726	-4.88412	-6.86651	5e-05	0.000399594	yes
XLOC_012438	XLOC_012438	Gm14403	chr2:177282930-177297016	KO	WT	OK	0.30927	1.41781	2.19672	3.73428	0.0002	0.00138545	yes
XLOC_012468	XLOC_012468	Col20a1	chr2:180721239-180752245	KO	WT	OK	2.61341	0.0974461	-4.74519	-6.54474	5e-05	0.000399594	yes
XLOC_012473	XLOC_012473	Lime1	chr2:181115939-181118333	KO	WT	OK	13.4459	6.39473	-1.07221	-3.63721	5e-05	0.000399594	yes
XLOC_012493	XLOC_012493	Mcm10	chr2:4911769-4933837	KO	WT	OK	11.5055	25.2518	1.13406	4.56715	5e-05	0.000399594	yes
XLOC_012501	XLOC_012501	Echdc3	chr2:6109510-6242657	KO	WT	OK	2.4162	0.758045	-1.67238	-2.94308	0.0004	0.00247463	yes
XLOC_012522	XLOC_012522	Nsun6	chr2:14912070-14976499	KO	WT	OK	3.18253	1.58415	-1.00646	-2.99346	0.0001	0.000747562	yes
XLOC_012524	XLOC_012524	Nebl	chr2:17264299-17652761	KO	WT	OK	0.41692	1.02774	1.30163	2.56882	0.0009	0.00486651	yes
XLOC_012538	XLOC_012538	Mastl	chr2:22972063-23011544	KO	WT	OK	5.15973	11.6008	1.16885	4.29819	5e-05	0.000399594	yes
XLOC_012548	XLOC_012548	Tor4a	chr2:25048239-25052333	KO	WT	OK	8.78894	4.24187	-1.05099	-3.65068	5e-05	0.000399594	yes
XLOC_012560	XLOC_012560	Uap1l1	chr2:25217009-25221183	KO	WT	OK	10.0416	4.95105	-1.02019	-3.00934	5e-05	0.000399594	yes
XLOC_012592	XLOC_012592	Snhg7	chr2:26492695-26495764	KO	WT	OK	19.3373	6.9207	-1.4824	-3.71996	5e-05	0.000399594	yes
XLOC_012604	XLOC_012604	Mymk	chr2:26917155-26927681	KO	WT	OK	1.27945	8.21851	2.68335	5.41422	5e-05	0.000399594	yes
XLOC_012611	XLOC_012611	1700007K13Rik	chr2:28317520-28321844	KO	WT	OK	24.2341	1.80503	-3.74694	-7.01596	5e-05	0.000399594	yes
XLOC_012619	XLOC_012619	6530402F18Rik,Ntng2	chr2:29050245-29108513	KO	WT	OK	0.870032	2.15201	1.30655	2.59951	0.00065	0.00373726	yes
XLOC_012630	XLOC_012630	Dolk	chr2:30139748-30141874	KO	WT	OK	5.16048	13.1698	1.35165	4.36133	5e-05	0.000399594	yes
XLOC_012641	XLOC_012641	D330023K18Rik	chr2:31006568-31007811	KO	WT	OK	4.94966	1.107	-2.16067	-2.22787	0.012	0.0407737	yes
XLOC_012644	XLOC_012644	Fibcd1	chr2:31668809-31701525	KO	WT	OK	1.97469	6.62719	1.74677	5.66709	5e-05	0.000399594	yes
XLOC_012662	XLOC_012662	Garnl3	chr2:32841744-32986956	KO	WT	OK	2.97571	1.47516	-1.01236	-2.78685	0.0003	0.00192981	yes
XLOC_012675	XLOC_012675	Traf1	chr2:34797269-34817292	KO	WT	OK	5.27792	0.917325	-2.52447	-6.7596	5e-05	0.000399594	yes
XLOC_012684	XLOC_012684	Ttll11	chr2:35606759-35835340	KO	WT	OK	1.43598	0.508063	-1.49896	-2.9006	0.00055	0.00324124	yes
XLOC_012723	XLOC_012723	Nmi	chr2:51804018-51828728	KO	WT	OK	2.09187	0.974106	-1.10264	-1.77099	0.01435	0.0469217	yes
XLOC_012729	XLOC_012729	Rprm	chr2:53936503-53937963	KO	WT	OK	1.91292	0.321425	-2.57322	-2.96801	0.00435	0.0180673	yes
XLOC_012742	XLOC_012742	Ly75	chr2:60130159-60221330	KO	WT	OK	2.24088	5.2092	1.217	4.25584	5e-05	0.000399594	yes
XLOC_012743	XLOC_012743	Pla2r1	chr2:60255599-60391365	KO	WT	OK	2.18186	0.929621	-1.23084	-3.61141	5e-05	0.000399594	yes
XLOC_012776	XLOC_012776	Dlx2	chr2:71381464-71384811	KO	WT	OK	6.01627	17.122	1.50891	5.37612	5e-05	0.000399594	yes
XLOC_012803	XLOC_012803	Ttn	chr2:76542040-76820604	KO	WT	OK	1.34558	2.9937	1.1537	4.70458	5e-05	0.000399594	yes
XLOC_012820	XLOC_012820	Selenoh	chr2:84509371-84510865	KO	WT	OK	47.6793	131.762	1.4665	5.58323	5e-05	0.000399594	yes
XLOC_012826	XLOC_012826	Smtnl1	chr2:84651332-84662809	KO	WT	OK	1.88533	0.116459	-4.01692	-3.63144	0.00345	0.0150051	yes
XLOC_012987	XLOC_012987	Nr1h3	chr2:91024217-91035273	KO	WT	OK	2.50111	0.738724	-1.75946	-3.08603	0.0003	0.00192981	yes
XLOC_012993	XLOC_012993	Mdk	chr2:91762345-91772454	KO	WT	OK	3.50493	7.91942	1.17601	2.47026	0.0006	0.00349059	yes
XLOC_013003	XLOC_013003	Tspan18	chr2:93041916-93174644	KO	WT	OK	1.20965	2.56616	1.08502	2.90606	0.0001	0.000747562	yes
XLOC_013019	XLOC_013019	Ldlrad3	chr2:101790357-102026617	KO	WT	OK	6.45548	15.2822	1.24326	4.69789	5e-05	0.000399594	yes
XLOC_013039	XLOC_013039	Prrg4	chr2:104670897-104690007	KO	WT	OK	27.0871	13.2927	-1.02698	-4.03413	5e-05	0.000399594	yes
XLOC_013055	XLOC_013055	Fibin	chr2:110201081-110203150	KO	WT	OK	0.495567	1.2975	1.38858	2.15553	0.0061	0.0237717	yes
XLOC_013056	XLOC_013056	Ano3	chr2:110495357-110790401	KO	WT	OK	9.94149	1.54647	-2.68448	-8.14532	5e-05	0.000399594	yes
XLOC_013086	XLOC_013086	Arhgap11a	chr2:113671649-113688818	KO	WT	OK	15.4705	38.5964	1.31895	5.45003	5e-05	0.000399594	yes
XLOC_013088	XLOC_013088	Actc1	chr2:113873019-113878611	KO	WT	OK	0.69362	7.45385	3.42577	5.73252	5e-05	0.000399594	yes
XLOC_013101	XLOC_013101	Gpr176	chr2:118102833-118199155	KO	WT	OK	4.79151	0.880276	-2.44445	-6.15879	5e-05	0.000399594	yes
XLOC_013173	XLOC_013173	Ncaph	chr2:126929545-126959690	KO	WT	OK	17.7561	35.9774	1.01878	4.12717	5e-05	0.000399594	yes
XLOC_013184	XLOC_013184	Mtln	chr2:127617113-127618224	KO	WT	OK	36.3638	17.9446	-1.01896	-3.25905	5e-05	0.000399594	yes
XLOC_013185	XLOC_013185	Bub1	chr2:127625935-127657595	KO	WT	OK	10.1965	25.6693	1.33198	5.26453	5e-05	0.000399594	yes
XLOC_013186	XLOC_013186	Morrbid	chr2:128124398-128255087	KO	WT	OK	30.746	11.2274	-1.45337	-3.48298	5e-05	0.000399594	yes
XLOC_013191	XLOC_013191	Ckap2l	chr2:129093945-129122948	KO	WT	OK	12.8765	33.7077	1.38834	5.59485	5e-05	0.000399594	yes
XLOC_013207	XLOC_013207	Slc4a11	chr2:130509843-130523255	KO	WT	OK	4.26754	1.04554	-2.02915	-5.10525	5e-05	0.000399594	yes
XLOC_013210	XLOC_013210	A730017L22Rik	chr2:130698276-130732132	KO	WT	OK	4.53153	2.23198	-1.02167	-2.68131	0.0007	0.00397059	yes
XLOC_013215	XLOC_013215	Spef1	chr2:130995996-131000546	KO	WT	OK	10.1838	5.06931	-1.00642	-3.25884	5e-05	0.000399594	yes
XLOC_013247	XLOC_013247	Snx5	chr2:144075858-144096638	KO	WT	OK	60.3795	125.622	1.05696	4.51192	5e-05	0.000399594	yes
XLOC_013259	XLOC_013259	Thbd	chr2:148230206-148233924	KO	WT	OK	10.236	3.01276	-1.7645	-5.89791	5e-05	0.000399594	yes
XLOC_013285	XLOC_013285	Trib3	chr2:152163160-152169796	KO	WT	OK	3.02484	6.19858	1.03508	2.87416	0.00015	0.00107374	yes
XLOC_013299	XLOC_013299	Dusp15	chr2:152766730-152777318	KO	WT	OK	1.48324	0.0488303	-4.92483	-1.13944	0.0198	0.0602214	no
XLOC_013303	XLOC_013303	2500004C02Rik	chr2:153166892-153171546	KO	WT	OK	0.57993	1.77493	1.61381	2.53799	0.002	0.00951935	yes
XLOC_013304	XLOC_013304	Nol4l	chr2:153233196-153355707	KO	WT	OK	1.02787	0.397034	-1.37232	-2.99616	0.00015	0.00107374	yes
XLOC_013309	XLOC_013309	Necab3	chr2:154370140-154384589	KO	WT	OK	1.05888	0.283498	-1.90113	-2.19463	0.01235	0.0416156	yes
XLOC_013313	XLOC_013313	Ahcy	chr2:154885047-154900233	KO	WT	OK	49.3364	101.352	1.03864	4.40626	5e-05	0.000399594	yes
XLOC_013322	XLOC_013322	BC029722	chr2:155601077-155644939	KO	WT	OK	22.5399	11.2254	-1.00571	-3.49089	5e-05	0.000399594	yes
XLOC_013332	XLOC_013332	Scand1	chr2:156137581-156201374	KO	WT	OK	133.495	64.857	-1.04145	-4.00273	5e-05	0.000399594	yes
XLOC_013345	XLOC_013345	Blcap	chr2:157382097-157392097	KO	WT	OK	74.433	33.2883	-1.16093	-4.65225	5e-05	0.000399594	yes
XLOC_013356	XLOC_013356	Emilin3	chr2:160732173-160738075	KO	WT	OK	1.41064	0.135391	-3.38115	-4.43834	0.00015	0.00107374	yes
XLOC_013388	XLOC_013388	Tnnc2	chr2:164602661-164605234	KO	WT	OK	0	2.65782	inf	#NAME?	5e-05	0.000399594	yes
XLOC_013392	XLOC_013392	Pltp	chr2:164656229-164683208	KO	WT	OK	16.0714	1.93181	-3.05647	-3.34311	0.0003	0.00192981	yes
XLOC_013405	XLOC_013405	Sulf2	chr2:165899398-165981183	KO	WT	OK	68.6122	15.1085	-2.18311	-9.03593	5e-05	0.000399594	yes
XLOC_013419	XLOC_013419	Nfatc2	chr2:168301909-168427157	KO	WT	OK	1.27651	0.500426	-1.35098	-2.78811	5e-05	0.000399594	yes
XLOC_013434	XLOC_013434	Aurka	chr2:172181689-172196070	KO	WT	OK	18.2438	62.6036	1.77884	7.11954	5e-05	0.000399594	yes
XLOC_013439	XLOC_013439	Pmepa1	chr2:173049965-173102034	KO	WT	OK	107.144	49.257	-1.12116	-4.73876	5e-05	0.000399594	yes
XLOC_013473	XLOC_013473	Lama5	chr2:179911077-179960564	KO	WT	OK	6.82201	14.4138	1.07918	4.50088	5e-05	0.000399594	yes
XLOC_013506	XLOC_013506	Pkia	chr3:7366603-7445365	KO	WT	OK	7.2689	19.8499	1.44932	5.4139	5e-05	0.000399594	yes
XLOC_013513	XLOC_013513	Fabp5	chr3:10012584-10016610	KO	WT	OK	31.417	119.679	1.92955	7.3266	5e-05	0.000399594	yes
XLOC_013514	XLOC_013514	Gm9833	chr3:10088276-10092562	KO	WT	OK	3.88506	7.9801	1.03847	2.83159	0.0001	0.000747562	yes
XLOC_013548	XLOC_013548	Eif5a2	chr3:28680198-28697768	KO	WT	OK	3.61769	7.7701	1.10286	3.87113	5e-05	0.000399594	yes
XLOC_013549	XLOC_013549	Rpl22l1	chr3:28704429-28706346	KO	WT	OK	58.9282	238.81	2.01883	7.10975	5e-05	0.000399594	yes
XLOC_013587	XLOC_013587	Bbs12	chr3:37211475-37220373	KO	WT	OK	2.15798	8.55439	1.98698	5.33675	5e-05	0.000399594	yes
XLOC_013597	XLOC_013597	Plk4	chr3:40603872-40620805	KO	WT	OK	16.5671	38.5801	1.21953	5.00204	5e-05	0.000399594	yes
XLOC_013648	XLOC_013648	Mme	chr3:63099132-63187635	KO	WT	OK	0.257119	1.52381	2.56718	4.64575	5e-05	0.000399594	yes
XLOC_013658	XLOC_013658	Mlf1	chr3:67178018-67203922	KO	WT	OK	0.881506	2.88388	1.70997	2.60607	0.00235	0.0108782	yes
XLOC_013674	XLOC_013674	Serpini1	chr3:75361414-75446445	KO	WT	OK	1.62001	0.721786	-1.16636	-2.35575	0.00165	0.00813559	yes
XLOC_013681	XLOC_013681	Gask1b	chr3:79689851-79750200	KO	WT	OK	13.6284	4.66982	-1.54518	-6.02263	5e-05	0.000399594	yes
XLOC_013692	XLOC_013692	Sfrp2	chr3:83570242-83578236	KO	WT	OK	0.719298	1.55326	1.11064	1.90956	0.0109	0.0377867	yes
XLOC_013696	XLOC_013696	Tmem154	chr3:84470113-84508497	KO	WT	OK	1.079	0.329729	-1.71035	-2.91915	0.0004	0.00247463	yes
XLOC_013716	XLOC_013716	Nes	chr3:87775014-87784373	KO	WT	OK	42.2738	93.092	1.1389	4.77506	5e-05	0.000399594	yes
XLOC_013738	XLOC_013738	Gba	chr3:89006849-89012795	KO	WT	OK	24.0237	10.5756	-1.18372	-4.35357	5e-05	0.000399594	yes
XLOC_013766	XLOC_013766	S100a13	chr3:90318356-90328503	KO	WT	OK	73.687	30.1514	-1.28918	-4.51603	5e-05	0.000399594	yes
XLOC_013813	XLOC_013813	Tdrkh	chr3:94217165-94236572	KO	WT	OK	0.691743	2.03586	1.55733	2.21711	0.00165	0.00813559	yes
XLOC_013819	XLOC_013819	Rfx5	chr3:94758029-94765483	KO	WT	OK	7.05886	3.19604	-1.14315	-3.96129	5e-05	0.000399594	yes
XLOC_013843	XLOC_013843	Mtmr11	chr3:95965892-95975641	KO	WT	OK	7.59747	3.60887	-1.07397	-3.50076	5e-05	0.000399594	yes
XLOC_013845	XLOC_013845	Sv2a	chr3:95985149-95999103	KO	WT	OK	1.22171	0.57283	-1.09273	-2.25376	0.0036	0.0155373	yes
XLOC_013888	XLOC_013888	Ngf	chr3:102273841-102324936	KO	WT	OK	1.0954	4.01896	1.87537	3.15665	0.00045	0.0027268	yes
XLOC_013889	XLOC_013889	Tspan2	chr3:102524153-102576233	KO	WT	OK	0.48644	1.42658	1.55223	2.97187	0.00025	0.00166535	yes
XLOC_013900	XLOC_013900	Bcl2l15	chr3:103636618-103658541	KO	WT	OK	14.9256	1.11062	-3.74835	-6.26147	5e-05	0.000399594	yes
XLOC_013901	XLOC_013901	Ptpn22	chr3:103663717-103716175	KO	WT	OK	7.13732	0.355495	-4.32748	-7.79396	5e-05	0.000399594	yes
XLOC_013935	XLOC_013935	Psrc1	chr3:108186721-108191149	KO	WT	OK	71.2069	31.6176	-1.17129	-4.77919	5e-05	0.000399594	yes
XLOC_013962	XLOC_013962	F3	chr3:121426454-121437970	KO	WT	OK	1.79778	0.886586	-1.01988	-1.82949	0.01485	0.0481432	yes
XLOC_013975	XLOC_013975	Arsj	chr3:126066769-126143292	KO	WT	OK	1.51193	3.65411	1.27313	3.5573	5e-05	0.000399594	yes
XLOC_013990	XLOC_013990	Elovl6	chr3:129230384-129341411	KO	WT	OK	3.93104	8.51312	1.11478	4.15707	5e-05	0.000399594	yes
XLOC_014006	XLOC_014006	Cenpe	chr3:134875526-134936504	KO	WT	OK	8.02985	20.0634	1.32112	5.33338	5e-05	0.000399594	yes
XLOC_014007	XLOC_014007	Bdh2	chr3:134944184-134967389	KO	WT	OK	2.25138	0.464089	-2.27833	-2.74763	0.00205	0.00970646	yes
XLOC_014008	XLOC_014008	Slc9b2	chr3:134970663-135005731	KO	WT	OK	1.67602	0.634234	-1.40196	-2.44002	0.0019	0.00911321	yes
XLOC_014011	XLOC_014011	Manba	chr3:135148574-135234367	KO	WT	OK	4.99367	2.18276	-1.19395	-3.69768	5e-05	0.000399594	yes
XLOC_014016	XLOC_014016	Ddit4l	chr3:137286635-137291296	KO	WT	OK	34.8361	15.7325	-1.14684	-4.56783	5e-05	0.000399594	yes
XLOC_014017	XLOC_014017	H2az1	chr3:137527450-137529886	KO	WT	OK	202.254	438.264	1.11564	4.76376	5e-05	0.000399594	yes
XLOC_014083	XLOC_014083	Depdc1a	chr3:159158396-159192919	KO	WT	OK	3.67568	10.7675	1.55059	4.82063	5e-05	0.000399594	yes
XLOC_014094	XLOC_014094	Tpd52	chr3:8926529-9004723	KO	WT	OK	8.09517	3.85714	-1.06953	-3.88787	5e-05	0.000399594	yes
XLOC_014096	XLOC_014096	Pag1	chr3:9687481-9833679	KO	WT	OK	5.11252	2.23253	-1.19535	-4.38015	5e-05	0.000399594	yes
XLOC_014128	XLOC_014128	Ect2	chr3:26996143-27052800	KO	WT	OK	12.3876	39.4344	1.67056	6.70737	5e-05	0.000399594	yes
XLOC_014138	XLOC_014138	Zmat3	chr3:32233715-32266360	KO	WT	OK	61.0545	28.0691	-1.12111	-4.75544	5e-05	0.000399594	yes
XLOC_014156	XLOC_014156	Ccna2	chr3:36451527-36471960	KO	WT	OK	29.0473	105.079	1.855	6.56403	5e-05	0.000399594	yes
XLOC_014161	XLOC_014161	Cetn4	chr3:37207548-37211368	KO	WT	OK	4.25267	1.78298	-1.25407	-2.27719	0.0034	0.0148368	yes
XLOC_014183	XLOC_014183	Mgarp	chr3:51192334-51200469	KO	WT	OK	0.879308	2.01052	1.19313	1.92686	0.0106	0.0369529	yes
XLOC_014203	XLOC_014203	Pfn2	chr3:57645816-57651679	KO	WT	OK	61.5923	13.3926	-2.20131	-8.37307	5e-05	0.000399594	yes
XLOC_014210	XLOC_014210	F630111L10Rik,P2ry14	chr3:58810899-59148178	KO	WT	OK	17.1655	3.58582	-2.25914	-5.83235	5e-05	0.000399594	yes
XLOC_014235	XLOC_014235	Lxn	chr3:67234036-67278990	KO	WT	OK	14.5206	4.00065	-1.85979	-1.67102	0.02505	0.0727942	no
XLOC_014238	XLOC_014238	Trim59	chr3:68839215-68848664	KO	WT	OK	21.1202	51.4307	1.28401	5.17473	5e-05	0.000399594	yes
XLOC_014246	XLOC_014246	Bche	chr3:73439730-73512337	KO	WT	OK	1.25664	2.65875	1.08117	3.19457	5e-05	0.000399594	yes
XLOC_014272	XLOC_014272	Mnd1	chr3:83891855-83959708	KO	WT	OK	3.50871	9.19909	1.39055	2.984	0.0002	0.00138545	yes
XLOC_014285	XLOC_014285	Cd1d1	chr3:86799757-86803262	KO	WT	OK	1.2367	2.74245	1.14898	2.31984	0.00215	0.0100709	yes
XLOC_014290	XLOC_014290	Pear1	chr3:87553018-87572875	KO	WT	OK	3.69069	0.872291	-2.08101	-5.24005	5e-05	0.000399594	yes
XLOC_014327	XLOC_014327	Efna3	chr3:89118872-89126801	KO	WT	OK	1.19501	0.440692	-1.43918	-1.63327	0.03405	0.0924606	no
XLOC_014333	XLOC_014333	Cks1b	chr3:89219393-89222213	KO	WT	OK	94.4576	212.219	1.16781	4.77254	5e-05	0.000399594	yes
XLOC_014334	XLOC_014334	Chrnb2	chr3:89518943-89568554	KO	WT	OK	1.58885	0.162538	-3.28914	-2.23314	0.0128	0.0427415	yes
XLOC_014335	XLOC_014335	4632404H12Rik	chr3:89571432-89577322	KO	WT	OK	1.65131	0.817035	-1.01514	-2.09626	0.005	0.0202193	yes
XLOC_014336	XLOC_014336	Il6ra	chr3:89673245-89717118	KO	WT	OK	2.78974	1.06928	-1.38349	-3.46536	5e-05	0.000399594	yes
XLOC_014343	XLOC_014343	Slc27a3	chr3:90189154-90193860	KO	WT	OK	22.1567	10.9634	-1.01506	-3.77958	5e-05	0.000399594	yes
XLOC_014348	XLOC_014348	S100a1	chr3:90314955-90318252	KO	WT	OK	40.0561	18.8893	-1.08445	-3.25946	5e-05	0.000399594	yes
XLOC_014352	XLOC_014352	Prr9	chr3:91926125-91927869	KO	WT	OK	1.53108	8.3874	2.45367	4.74607	5e-05	0.000399594	yes
XLOC_014407	XLOC_014407	Adamtsl4	chr3:95480124-95491840	KO	WT	OK	1.74519	0.674346	-1.37183	-3.13943	5e-05	0.000399594	yes
XLOC_014408	XLOC_014408	Ecm1	chr3:95538069-95543492	KO	WT	OK	78.3549	29.8571	-1.39195	-5.69627	5e-05	0.000399594	yes
XLOC_014414	XLOC_014414	Ciart	chr3:95675444-95695928	KO	WT	OK	4.22276	2.06264	-1.03369	-2.23157	0.00315	0.0139679	yes
XLOC_014442	XLOC_014442	Phgdh	chr3:98117093-98143892	KO	WT	OK	73.6999	214.258	1.53962	6.56362	5e-05	0.000399594	yes
XLOC_014521	XLOC_014521	Gpsm2	chr3:108456830-108525217	KO	WT	OK	6.3592	13.7307	1.11049	2.9806	5e-05	0.000399594	yes
XLOC_014527	XLOC_014527	Prmt6	chr3:110049021-110053917	KO	WT	OK	10.5749	21.4011	1.01704	3.83836	5e-05	0.000399594	yes
XLOC_014554	XLOC_014554	Tlcd4	chr3:120904925-120966258	KO	WT	OK	1.63475	0.675413	-1.27522	-3.19779	5e-05	0.000399594	yes
XLOC_014564	XLOC_014564	Synpo2	chr3:122779436-122939067	KO	WT	OK	5.96503	2.48035	-1.26599	-4.62896	5e-05	0.000399594	yes
XLOC_014588	XLOC_014588	Cyp2u1	chr3:130993408-131006145	KO	WT	OK	7.40833	1.75334	-2.07904	-5.43547	5e-05	0.000399594	yes
XLOC_014606	XLOC_014606	Dapp1	chr3:137593970-137644513	KO	WT	OK	1.85724	0.559344	-1.73136	-3.42495	5e-05	0.000399594	yes
XLOC_014616	XLOC_014616	Bmpr1b	chr3:141500099-141832389	KO	WT	OK	1.01529	2.28003	1.16717	3.15748	5e-05	0.000399594	yes
XLOC_014645	XLOC_014645	Gipc2	chr3:151756804-151828864	KO	WT	OK	1.62356	0.564515	-1.52407	-2.11012	0.00825	0.0303091	yes
XLOC_014666	XLOC_014666	Cth	chr3:157557211-157588027	KO	WT	OK	2.24043	4.60189	1.03845	2.4581	0.00075	0.00420171	yes
XLOC_014689	XLOC_014689	Trp53inp1	chr4:11083587-11101526	KO	WT	OK	38.1899	18.785	-1.02361	-4.32255	5e-05	0.000399594	yes
XLOC_014690	XLOC_014690	Ccne2	chr4:11118497-11181406	KO	WT	OK	16.2023	32.6823	1.01231	2.70273	0.00025	0.00166535	yes
XLOC_014708	XLOC_014708	Rmdn1	chr4:19502212-19534079	KO	WT	OK	4.02965	1.98648	-1.02044	-2.33204	0.00225	0.0104852	yes
XLOC_014716	XLOC_014716	Faxc	chr4:21858472-21928608	KO	WT	OK	2.01063	4.41895	1.13606	4.09977	5e-05	0.000399594	yes
XLOC_014721	XLOC_014721	Gpr63	chr4:24900565-24936380	KO	WT	OK	1.47492	3.01594	1.03196	2.29529	0.00245	0.0113056	yes
XLOC_014737	XLOC_014737	Cnr1	chr4:34011238-34035806	KO	WT	OK	0.326931	1.21696	1.89622	3.52633	0.0001	0.000747562	yes
XLOC_014760	XLOC_014760	Il11ra1	chr4:41707315-41721049	KO	WT	OK	13.3124	4.23202	-1.65335	-4.63367	5e-05	0.000399594	yes
XLOC_014780	XLOC_014780	Rusc2	chr4:43394853-43442006	KO	WT	OK	16.2164	7.83602	-1.04926	-4.05553	5e-05	0.000399594	yes
XLOC_014788	XLOC_014788	Hrct1	chr4:43740069-43740982	KO	WT	OK	2.849	6.8332	1.2621	2.59562	0.00075	0.00420171	yes
XLOC_014796	XLOC_014796	Melk	chr4:44313788-44377547	KO	WT	OK	11.6418	25.9185	1.15466	4.45904	5e-05	0.000399594	yes
XLOC_014853	XLOC_014853	Gm12596	chr4:59272922-59282016	KO	WT	OK	0.314641	1.41433	2.16834	2.49458	0.0071	0.0268273	yes
XLOC_014930	XLOC_014930	Tek	chr4:94405979-94541667	KO	WT	OK	1.36051	0.649666	-1.06638	-2.45548	0.0008	0.00440859	yes
XLOC_014931	XLOC_014931	Fggy	chr4:95224197-95593630	KO	WT	OK	4.67398	10.2015	1.12606	3.42352	5e-05	0.000399594	yes
XLOC_014933	XLOC_014933	Nfia	chr4:97234565-97785567	KO	WT	OK	6.55421	2.77418	-1.24036	-4.73494	5e-05	0.000399594	yes
XLOC_014934	XLOC_014934	Patj	chr4:98062516-98386294	KO	WT	OK	0.622701	1.65369	1.40908	3.00416	5e-05	0.000399594	yes
XLOC_014981	XLOC_014981	Lrp8	chr4:107474863-107549445	KO	WT	OK	3.04162	8.2415	1.43807	5.34837	5e-05	0.000399594	yes
XLOC_015013	XLOC_015013	Foxd2os	chr4:114581861-114593723	KO	WT	OK	0.386545	1.51329	1.96898	3.43642	5e-05	0.000399594	yes
XLOC_015081	XLOC_015081	Mycl	chr4:122673173-122679723	KO	WT	OK	0.482982	3.3004	2.7726	5.74701	5e-05	0.000399594	yes
XLOC_015120	XLOC_015120	5730409E04Rik	chr4:126287097-126291615	KO	WT	OK	12.0946	5.81401	-1.05676	-3.76073	5e-05	0.000399594	yes
XLOC_015173	XLOC_015173	Ahdc1	chr4:132567420-132634025	KO	WT	OK	26.6032	11.9708	-1.15208	-4.82289	5e-05	0.000399594	yes
XLOC_015193	XLOC_015193	Aunip	chr4:134066913-134079837	KO	WT	OK	5.9249	13.9798	1.23848	3.71269	5e-05	0.000399594	yes
XLOC_015202	XLOC_015202	Myom3	chr4:135315629-135371482	KO	WT	OK	0.702871	2.01601	1.52017	3.97037	5e-05	0.000399594	yes
XLOC_015205	XLOC_015205	Fuca1	chr4:135476640-135496215	KO	WT	OK	39.4027	18.4857	-1.09188	-4.39963	5e-05	0.000399594	yes
XLOC_015211	XLOC_015211	Tcea3	chr4:135803871-135830814	KO	WT	OK	5.33925	1.08342	-2.30105	-4.28413	5e-05	0.000399594	yes
XLOC_015244	XLOC_015244	Aldh4a1	chr4:139178808-139205606	KO	WT	OK	14.9216	5.59098	-1.41623	-5.22174	5e-05	0.000399594	yes
XLOC_015252	XLOC_015252	Padi2	chr4:140462274-140513817	KO	WT	OK	11.7818	3.69528	-1.6728	-6.11299	5e-05	0.000399594	yes
XLOC_015260	XLOC_015260	Gm13056	chr4:140834353-140835707	KO	WT	OK	23.0548	4.9778	-2.21149	-4.35118	5e-05	0.000399594	yes
XLOC_015310	XLOC_015310	Mthfr	chr4:147413185-147433671	KO	WT	OK	9.90679	4.59092	-1.10963	-4.30523	5e-05	0.000399594	yes
XLOC_015368	XLOC_015368	Fndc10	chr4:155068450-155070592	KO	WT	OK	18.4171	4.60687	-1.99919	-6.36704	5e-05	0.000399594	yes
XLOC_015374	XLOC_015374	Ccnl2	chr4:155186597-155198652	KO	WT	OK	82.0463	37.873	-1.11527	-4.68215	5e-05	0.000399594	yes
XLOC_015396	XLOC_015396	Penk	chr4:4060682-4065962	KO	WT	OK	1.40089	0.603297	-1.2154	-1.71818	0.0246	0.071663	no
XLOC_015445	XLOC_015445	Pm20d2	chr4:33257381-33276712	KO	WT	OK	1.26619	0.457629	-1.46824	-3.17134	5e-05	0.000399594	yes
XLOC_015453	XLOC_015453	Zfp292	chr4:34750358-34830197	KO	WT	OK	18.6105	8.14774	-1.19164	-4.9415	5e-05	0.000399594	yes
XLOC_015461	XLOC_015461	Ddx58	chr4:40150809-40186858	KO	WT	OK	3.89099	1.33319	-1.54526	-4.58545	5e-05	0.000399594	yes
XLOC_015476	XLOC_015476	Kif24	chr4:41337780-41411881	KO	WT	OK	1.62829	3.38343	1.05513	3.39554	5e-05	0.000399594	yes
XLOC_015481	XLOC_015481	Cntfr	chr4:41604528-41644123	KO	WT	OK	1.55796	0.702003	-1.15011	-2.0135	0.00775	0.0287676	yes
XLOC_015503	XLOC_015503	Fam214b	chr4:43045285-43059092	KO	WT	OK	12.773	6.38122	-1.00119	-3.68295	5e-05	0.000399594	yes
XLOC_015507	XLOC_015507	Rmrp	chr4:43505656-43505931	KO	WT	OK	64.9094	4.38986	-3.88618	-3.51061	0.0087	0.0316764	yes
XLOC_015508	XLOC_015508	Arhgef39	chr4:43509015-43526597	KO	WT	OK	1.2896	3.87564	1.58751	3.72183	5e-05	0.000399594	yes
XLOC_015509	XLOC_015509	Tpm2	chr4:43526597-43536426	KO	WT	OK	13.371	46.088	1.78528	6.78028	5e-05	0.000399594	yes
XLOC_015529	XLOC_015529	Fbxo10	chr4:45031480-45097476	KO	WT	OK	1.36767	3.47045	1.3434	2.26244	0.00415	0.0174516	yes
XLOC_015542	XLOC_015542	Coro2a	chr4:46517943-46614801	KO	WT	OK	1.00377	0.38113	-1.39708	-2.5229	0.00145	0.00728642	yes
XLOC_015543	XLOC_015543	Tbc1d2	chr4:46617261-46663071	KO	WT	OK	5.49392	1.27242	-2.11025	-6.16803	5e-05	0.000399594	yes
XLOC_015562	XLOC_015562	Abca1	chr4:53043660-53172767	KO	WT	OK	2.17053	0.666328	-1.70374	-5.15623	5e-05	0.000399594	yes
XLOC_015583	XLOC_015583	Ptgr1	chr4:58978461-58999950	KO	WT	OK	87.0827	187.484	1.10631	4.71282	5e-05	0.000399594	yes
XLOC_015611	XLOC_015611	Hdhd3	chr4:62160087-62163234	KO	WT	OK	0.626943	1.91128	1.60813	2.09859	0.0097	0.0344668	yes
XLOC_015655	XLOC_015655	Plin2	chr4:86302468-86315963	KO	WT	OK	82.3683	36.9627	-1.15602	-4.78797	5e-05	0.000399594	yes
XLOC_015673	XLOC_015673	Gm12602	chr4:88745770-88774130	KO	WT	OK	1.0224	3.15512	1.62573	2.82079	0.0007	0.00397059	yes
XLOC_015674	XLOC_015674	Cdkn2a	chr4:88920376-88940523	KO	WT	OK	5.47891	15.9788	1.5442	3.96585	5e-05	0.000399594	yes
XLOC_015721	XLOC_015721	Acot11	chr4:106406519-106477612	KO	WT	OK	1.15898	0.539847	-1.10224	-2.54294	0.0009	0.00486651	yes
XLOC_015729	XLOC_015729	Podn	chr4:107687397-107704695	KO	WT	OK	2.74683	0.503927	-2.44648	-4.91237	5e-05	0.000399594	yes
XLOC_015762	XLOC_015762	Rad54l	chr4:115747873-115796295	KO	WT	OK	5.65398	14.5544	1.36412	2.0266	0.01415	0.0464221	yes
XLOC_015768	XLOC_015768	Nasp	chr4:116273656-116300556	KO	WT	OK	60.153	155.081	1.36631	5.68705	5e-05	0.000399594	yes
XLOC_015775	XLOC_015775	Btbd19	chr4:116791822-116798330	KO	WT	OK	26.1268	11.1049	-1.23433	-4.70913	5e-05	0.000399594	yes
XLOC_015780	XLOC_015780	Kif2c	chr4:116832237-116855229	KO	WT	OK	9.81601	33.7522	1.78177	6.94945	5e-05	0.000399594	yes
XLOC_015785	XLOC_015785	Ccdc24	chr4:117507862-117545075	KO	WT	OK	4.80829	1.62354	-1.56638	-1.94711	0.01525	0.0492237	yes
XLOC_015793	XLOC_015793	Ptprf	chr4:117880817-117964002	KO	WT	OK	34.1106	9.92623	-1.7809	-7.42765	5e-05	0.000399594	yes
XLOC_015796	XLOC_015796	Cdc20	chr4:118100697-118109948	KO	WT	OK	39.3456	139.005	1.82086	4.94862	5e-05	0.000399594	yes
XLOC_015819	XLOC_015819	Frg2f1	chr4:119202922-119211374	KO	WT	OK	1.45321	0.466806	-1.63835	-2.59496	0.0011	0.0057555	yes
XLOC_015828	XLOC_015828	Zfp69	chr4:120602741-120624306	KO	WT	OK	0.610358	1.2322	1.0135	1.84013	0.0155	0.0497585	yes
XLOC_015852	XLOC_015852	Cdca8	chr4:124595708-124614161	KO	WT	OK	26.3208	76.7638	1.54422	6.21996	5e-05	0.000399594	yes
XLOC_015867	XLOC_015867	Zmym1	chr4:126724337-126738398	KO	WT	OK	5.42456	13.2443	1.28779	4.70457	5e-05	0.000399594	yes
XLOC_015878	XLOC_015878	Azin2	chr4:128607476-128639699	KO	WT	OK	4.4448	1.04835	-2.084	-4.42565	5e-05	0.000399594	yes
XLOC_015899	XLOC_015899	Tinagl1	chr4:129842843-129852366	KO	WT	OK	2.68012	1.02926	-1.38069	-2.75292	0.0002	0.00138545	yes
XLOC_015926	XLOC_015926	Gpr3	chr4:132765254-132768451	KO	WT	OK	2.4165	1.19322	-1.01806	-2.07904	0.006	0.0234284	yes
XLOC_015927	XLOC_015927	Sytl1	chr4:132809004-132819002	KO	WT	OK	15.5	0.99278	-3.96465	-8.79154	5e-05	0.000399594	yes
XLOC_015971	XLOC_015971	Ephb2	chr4:136203455-136391927	KO	WT	OK	0.487781	1.41885	1.54042	4.50767	5e-05	0.000399594	yes
XLOC_016008	XLOC_016008	Padi3	chr4:140341283-140366563	KO	WT	OK	2.11752	5.52684	1.38408	4.01448	5e-05	0.000399594	yes
XLOC_016032	XLOC_016032	Pdpn	chr4:142857311-142889467	KO	WT	OK	159.382	74.8139	-1.09111	-4.62797	5e-05	0.000399594	yes
XLOC_016078	XLOC_016078	Cenps	chr4:148502457-148511709	KO	WT	OK	10.6966	23.8472	1.15666	3.56739	5e-05	0.000399594	yes
XLOC_016095	XLOC_016095	Per3	chr4:150377763-150418774	KO	WT	OK	4.10613	1.96359	-1.06429	-3.54817	5e-05	0.000399594	yes
XLOC_016102	XLOC_016102	Espn	chr4:151494984-151526498	KO	WT	OK	4.84943	0.768471	-2.65775	-4.46717	5e-05	0.000399594	yes
XLOC_016142	XLOC_016142	Isg15	chr4:155573532-155574927	KO	WT	OK	1.28487	3.64347	1.50369	2.14203	0.00815	0.0300164	yes
XLOC_016143	XLOC_016143	Plekhn1	chr4:155595564-155602651	KO	WT	OK	3.31563	1.47526	-1.16832	-2.84726	0.0005	0.00298533	yes
XLOC_016154	XLOC_016154	Mterf1b	chr5:4192366-4197651	KO	WT	OK	0.362436	1.80748	2.31818	2.71523	0.00435	0.0180673	yes
XLOC_016159	XLOC_016159	Slc25a40	chr5:8422837-8454839	KO	WT	OK	1.76057	3.97565	1.17515	3.00026	5e-05	0.000399594	yes
XLOC_016172	XLOC_016172	Sema3a	chr5:13396783-13603485	KO	WT	OK	4.3229	8.72679	1.01345	3.72975	5e-05	0.000399594	yes
XLOC_016174	XLOC_016174	Sema3e	chr5:14025275-14256689	KO	WT	OK	3.38091	13.5364	2.00136	7.50978	5e-05	0.000399594	yes
XLOC_016189	XLOC_016189	Fgl2	chr5:20798778-20930495	KO	WT	OK	0.8805	1.95979	1.1543	2.59128	0.00095	0.00508332	yes
XLOC_016191	XLOC_016191	Lrrc17	chr5:20989664-21151423	KO	WT	OK	11.1252	50.175	2.17314	8.18414	5e-05	0.000399594	yes
XLOC_016207	XLOC_016207	Asic3	chr5:23919268-23923652	KO	WT	OK	0.650798	1.67682	1.36545	2.36139	0.0026	0.0119001	yes
XLOC_016214	XLOC_016214	2900005J15Rik	chr5:24606792-24608825	KO	WT	OK	2.00354	0.586019	-1.77353	-2.8801	0.00065	0.00373726	yes
XLOC_016243	XLOC_016243	Cenpa	chr5:30969258-30977210	KO	WT	OK	29.6389	113.269	1.93419	7.67367	5e-05	0.000399594	yes
XLOC_016248	XLOC_016248	Emilin1	chr5:31216158-31223646	KO	WT	OK	3.5343	13.4006	1.9228	6.70928	5e-05	0.000399594	yes
XLOC_016255	XLOC_016255	Trim54	chr5:31418984-31439999	KO	WT	OK	0.160368	1.78293	3.47479	3.32871	0.00595	0.0232871	yes
XLOC_016267	XLOC_016267	Fosl2	chr5:32438844-32460212	KO	WT	OK	35.3753	16.6873	-1.08399	-4.56069	5e-05	0.000399594	yes
XLOC_016276	XLOC_016276	Tacc3	chr5:34000776-34014851	KO	WT	OK	22.8293	61.7097	1.43461	5.88772	5e-05	0.000399594	yes
XLOC_016305	XLOC_016305	Ppp2r2c	chr5:37259748-37346317	KO	WT	OK	1.3092	0.093332	-3.81017	-4.39201	0.0005	0.00298533	yes
XLOC_016331	XLOC_016331	Ncapg	chr5:46061163-46248779	KO	WT	OK	11.29	29.4857	1.38497	4.51096	5e-05	0.000399594	yes
XLOC_016339	XLOC_016339	Sod3	chr5:52755042-52760977	KO	WT	OK	14.7144	1.91523	-2.94164	-7.73544	5e-05	0.000399594	yes
XLOC_016415	XLOC_016415	Ythdc1	chr5:87233290-87265684	KO	WT	OK	9.3028	39.0321	2.06892	8.12237	5e-05	0.000399594	yes
XLOC_016437	XLOC_016437	Slc4a4	chr5:89316284-89668681	KO	WT	OK	2.13971	1.05919	-1.01446	-3.03639	5e-05	0.000399594	yes
XLOC_016445	XLOC_016445	Cxcl5	chr5:91188323-91190651	KO	WT	OK	1.27495	0.429873	-1.56846	-2.09206	0.02135	0.0640609	no
XLOC_016454	XLOC_016454	Ereg	chr5:91503642-91522675	KO	WT	OK	2.91032	1.02267	-1.50884	-3.80641	5e-05	0.000399594	yes
XLOC_016455	XLOC_016455	Areg	chr5:91568624-91577458	KO	WT	OK	5.20005	15.6435	1.58896	4.47308	5e-05	0.000399594	yes
XLOC_016460	XLOC_016460	Art3	chr5:92760852-92843653	KO	WT	OK	8.94778	3.20115	-1.48294	-3.40779	5e-05	0.000399594	yes
XLOC_016479	XLOC_016479	Fras1	chr5:96802973-97213747	KO	WT	OK	0.336448	1.07925	1.68157	4.81633	5e-05	0.000399594	yes
XLOC_016498	XLOC_016498	Ptpn13	chr5:103854210-104027380	KO	WT	OK	2.51429	1.149	-1.12977	-3.68862	5e-05	0.000399594	yes
XLOC_016503	XLOC_016503	Dmp1	chr5:104626593-104643121	KO	WT	OK	4.23125	10.1039	1.25575	4.22672	5e-05	0.000399594	yes
XLOC_016508	XLOC_016508	Thoc2l	chr5:104937368-104983226	KO	WT	OK	14.8821	6.62418	-1.16777	-4.20385	5e-05	0.000399594	yes
XLOC_016526	XLOC_016526	Ccdc18	chr5:108561932-108661968	KO	WT	OK	0.567948	1.52987	1.42958	3.11834	0.00015	0.00107374	yes
XLOC_016552	XLOC_016552	Ttc28	chr5:111308821-111718799	KO	WT	OK	13.0828	4.46231	-1.55181	-6.36966	5e-05	0.000399594	yes
XLOC_016584	XLOC_016584	Oasl1	chr5:115373248-115387920	KO	WT	OK	0.931735	3.87695	2.05693	4.38309	5e-05	0.000399594	yes
XLOC_016585	XLOC_016585	2210016L21Rik	chr5:115392210-115398549	KO	WT	OK	6.10102	19.4479	1.67249	5.21035	5e-05	0.000399594	yes
XLOC_016644	XLOC_016644	Mir8115,P2rx7	chr5:123093935-123142345	KO	WT	OK	8.7919	2.62163	-1.74571	-2.82315	0.0001	0.000747562	yes
XLOC_016645	XLOC_016645	P2rx4	chr5:123157552-123179747	KO	WT	OK	9.42946	4.26252	-1.14547	-3.79319	5e-05	0.000399594	yes
XLOC_016660	XLOC_016660	Hip1r	chr5:124423636-124453224	KO	WT	OK	4.32876	11.653	1.42868	5.34122	5e-05	0.000399594	yes
XLOC_016667	XLOC_016667	Snrnp35	chr5:124933163-124941131	KO	WT	OK	7.42138	15.9213	1.1012	3.25923	5e-05	0.000399594	yes
XLOC_016675	XLOC_016675	Rflna	chr5:125483817-125492917	KO	WT	OK	3.3215	0.183828	-4.17541	-4.47808	0.0006	0.00349059	yes
XLOC_016684	XLOC_016684	Fzd10	chr5:129106980-129109968	KO	WT	OK	3.43249	0.858554	-1.99928	-4.45708	5e-05	0.000399594	yes
XLOC_016731	XLOC_016731	Rasa4	chr5:136559785-136587731	KO	WT	OK	40.9538	18.8694	-1.11795	-4.58257	5e-05	0.000399594	yes
XLOC_016737	XLOC_016737	4933404O12Rik	chr5:137395015-137412979	KO	WT	OK	1.16878	2.39456	1.03476	2.72125	0.00025	0.00166535	yes
XLOC_016776	XLOC_016776	Gpr146	chr5:139835692-139936488	KO	WT	OK	2.6064	0.748275	-1.80042	-1.91362	0.0174	0.0545668	no
XLOC_016787	XLOC_016787	Lfng	chr5:141083294-141091499	KO	WT	OK	1.40085	6.2613	2.16016	5.22356	5e-05	0.000399594	yes
XLOC_016807	XLOC_016807	D130017N08Rik	chr5:144519222-144525811	KO	WT	OK	4.76426	1.8902	-1.33372	-3.11622	0.0001	0.000747562	yes
XLOC_016809	XLOC_016809	Pms2	chr5:144670869-144692625	KO	WT	OK	2.43682	10.2142	2.06751	6.50893	5e-05	0.000399594	yes
XLOC_016836	XLOC_016836	Rasl11a	chr5:147656646-147659302	KO	WT	OK	0.950697	6.61481	2.79864	4.88996	5e-05	0.000399594	yes
XLOC_016879	XLOC_016879	Dbf4	chr5:8396968-8422716	KO	WT	OK	15.9366	39.52	1.31024	5.25901	5e-05	0.000399594	yes
XLOC_016894	XLOC_016894	Gnai1	chr5:17770952-17866231	KO	WT	OK	6.28122	20.2103	1.68598	6.19035	5e-05	0.000399594	yes
XLOC_016905	XLOC_016905	Reln	chr5:21390271-21850523	KO	WT	OK	1.157	3.74935	1.69625	6.02444	5e-05	0.000399594	yes
XLOC_016911	XLOC_016911	AI506816	chr5:23198078-23218485	KO	WT	OK	8.56856	29.558	1.78642	3.46323	5e-05	0.000399594	yes
XLOC_016916	XLOC_016916	Atg9b	chr5:23870636-23897961	KO	WT	OK	19.6521	2.82328	-2.79924	-9.64958	5e-05	0.000399594	yes
XLOC_016965	XLOC_016965	Rbks	chr5:31926811-31999983	KO	WT	OK	2.17632	1.00779	-1.1107	-1.62125	0.03145	0.0869405	no
XLOC_016979	XLOC_016979	Mxd4	chr5:34519228-34530359	KO	WT	OK	29.8851	10.6905	-1.4831	-4.86727	5e-05	0.000399594	yes
XLOC_016987	XLOC_016987	Cpz	chr5:35844866-35868275	KO	WT	OK	3.3159	0.124225	-4.73837	-4.99325	0.003	0.0133984	yes
XLOC_016990	XLOC_016990	Htra3	chr5:35994674-36022429	KO	WT	OK	21.4131	9.94041	-1.10712	-4.11054	5e-05	0.000399594	yes
XLOC_016999	XLOC_016999	Man2b2	chr5:37198051-37221888	KO	WT	OK	7.23843	3.12346	-1.21253	-4.00862	5e-05	0.000399594	yes
XLOC_017004	XLOC_017004	Msx1	chr5:38211729-38215824	KO	WT	OK	0.548983	2.57678	2.23073	3.35563	0.0005	0.00298533	yes
XLOC_017007	XLOC_017007	Slc2a9	chr5:38740511-38893391	KO	WT	OK	3.41258	1.04644	-1.70537	-4.25623	5e-05	0.000399594	yes
XLOC_017045	XLOC_017045	Arap2	chr5:62993684-63157416	KO	WT	OK	4.29311	1.08638	-1.98249	-6.351	5e-05	0.000399594	yes
XLOC_017055	XLOC_017055	Smim14	chr5:65839993-65884074	KO	WT	OK	17.8285	8.7615	-1.02494	-3.58517	5e-05	0.000399594	yes
XLOC_017063	XLOC_017063	Bend4	chr5:67783385-67819038	KO	WT	OK	0.360773	1.16824	1.69517	3.84204	5e-05	0.000399594	yes
XLOC_017064	XLOC_017064	Atp8a1	chr5:68009377-68238670	KO	WT	OK	3.91773	1.64828	-1.24906	-4.23515	5e-05	0.000399594	yes
XLOC_017080	XLOC_017080	Tec	chr5:73146956-73259687	KO	WT	OK	4.80852	1.81453	-1.40599	-3.69051	5e-05	0.000399594	yes
XLOC_017083	XLOC_017083	Ociad2	chr5:73713436-73730186	KO	WT	OK	3.54704	9.63291	1.44136	4.50574	5e-05	0.000399594	yes
XLOC_017149	XLOC_017149	Cxcl10	chr5:92760852-92843653	KO	WT	OK	1.18812	3.58106	1.59171	1.72872	0.03115	0.0862323	no
XLOC_017169	XLOC_017169	Prkg2	chr5:99358791-99466098	KO	WT	OK	1.68448	3.65646	1.11814	3.37848	5e-05	0.000399594	yes
XLOC_017197	XLOC_017197	Gbp8	chr5:105443171-105482580	KO	WT	OK	12.147	4.38765	-1.46909	-4.86912	5e-05	0.000399594	yes
XLOC_017206	XLOC_017206	Tgfbr3	chr5:107535585-107718648	KO	WT	OK	6.58964	2.07708	-1.66564	-5.76441	5e-05	0.000399594	yes
XLOC_017233	XLOC_017233	Gtpbp6	chr5:110528987-110537216	KO	WT	OK	6.91432	15.4298	1.15806	3.50989	5e-05	0.000399594	yes
XLOC_017236	XLOC_017236	Pxmp2	chr5:110703304-110715187	KO	WT	OK	1.56433	4.40372	1.49317	2.51371	0.00305	0.0135857	yes
XLOC_017247	XLOC_017247	Cryba4	chr5:112675511-112681538	KO	WT	OK	0.387886	1.39783	1.84949	1.4179	0.03775	0.100338	no
XLOC_017256	XLOC_017256	Crybb3	chr5:113504858-113510604	KO	WT	OK	1.9075	0.332853	-2.51872	-1.43778	0.0029	0.0130307	yes
XLOC_017257	XLOC_017257	2900026A02Rik	chr5:113515342-113650296	KO	WT	OK	12.5821	5.60921	-1.1655	-4.29948	5e-05	0.000399594	yes
XLOC_017268	XLOC_017268	Svop	chr5:114476921-114541389	KO	WT	OK	6.81697	0.53517	-3.67106	-7.84125	5e-05	0.000399594	yes
XLOC_017277	XLOC_017277	1500011B03Rik	chr5:115258204-115263985	KO	WT	OK	34.0182	4.94097	-2.78344	-6.46991	5e-05	0.000399594	yes
XLOC_017278	XLOC_017278	2610524H06Rik	chr5:115271945-115273477	KO	WT	OK	15.1252	6.06141	-1.31923	-3.44526	5e-05	0.000399594	yes
XLOC_017291	XLOC_017291	1110006O24Rik	chr5:116081057-116081825	KO	WT	OK	6.94	1.77075	-1.97058	-3.09889	0.0005	0.00298533	yes
XLOC_017296	XLOC_017296	Hspb8	chr5:116858499-116872873	KO	WT	OK	8.23883	40.4434	2.29539	8.24179	5e-05	0.000399594	yes
XLOC_017307	XLOC_017307	Sdsl	chr5:120908210-120922772	KO	WT	OK	2.38285	0.642366	-1.89122	-2.62595	0.00305	0.0135857	yes
XLOC_017334	XLOC_017334	Rad9b	chr5:122775516-122804204	KO	WT	OK	1.3477	0.670316	-1.00758	-1.53273	0.03115	0.0862323	no
XLOC_017398	XLOC_017398	Cldn4	chr5:135420992-135422804	KO	WT	OK	5.27422	16.8353	1.67446	5.29921	5e-05	0.000399594	yes
XLOC_017455	XLOC_017455	Gpc2	chr5:138714887-138721165	KO	WT	OK	1.3221	4.6915	1.82722	4.49114	5e-05	0.000399594	yes
XLOC_017459	XLOC_017459	Prkar1b	chr5:139493257-139662464	KO	WT	OK	4.10761	0.978226	-2.07006	-2.29063	0.00585	0.0229642	yes
XLOC_017474	XLOC_017474	Ttyh3	chr5:141096530-141124985	KO	WT	OK	8.557	19.093	1.15787	4.71469	5e-05	0.000399594	yes
XLOC_017556	XLOC_017556	Peg10	chr6:4697305-4710516	KO	WT	OK	8.93716	27.4731	1.62013	6.66337	5e-05	0.000399594	yes
XLOC_017558	XLOC_017558	Asb4	chr6:5333385-5383021	KO	WT	OK	0.791474	2.42626	1.61612	3.57622	5e-05	0.000399594	yes
XLOC_017605	XLOC_017605	Fam71f2	chr6:29231140-29240680	KO	WT	OK	1.26085	0.248592	-2.34255	-1.83592	0.01135	0.0390258	yes
XLOC_017613	XLOC_017613	Tspan33	chr6:29644213-29668558	KO	WT	OK	1.25481	6.0529	2.27016	5.10046	5e-05	0.000399594	yes
XLOC_017627	XLOC_017627	Mest	chr6:30683505-30846794	KO	WT	OK	7.4257	42.1988	2.5066	5.51592	5e-05	0.000399594	yes
XLOC_017637	XLOC_017637	Akr1b10	chr6:34334246-34346949	KO	WT	OK	15.33	6.34905	-1.27174	-3.95841	5e-05	0.000399594	yes
XLOC_017641	XLOC_017641	Agbl3	chr6:34730431-34809459	KO	WT	OK	2.72608	1.30651	-1.06111	-1.71748	0.0177	0.0552289	no
XLOC_017690	XLOC_017690	Zyx	chr6:42299826-42330557	KO	WT	OK	91.6093	188.354	1.03988	4.42382	5e-05	0.000399594	yes
XLOC_017721	XLOC_017721	Zfp862-ps	chr6:48454337-48484831	KO	WT	OK	15.4104	7.23251	-1.09133	-4.42546	5e-05	0.000399594	yes
XLOC_017729	XLOC_017729	Gimap9	chr6:48626133-48628703	KO	WT	OK	1.1938	0.348776	-1.77519	-2.00794	0.01675	0.0528796	no
XLOC_017734	XLOC_017734	Tmem176a	chr6:48791481-48795363	KO	WT	OK	43.8641	15.0141	-1.54672	-5.24391	5e-05	0.000399594	yes
XLOC_017740	XLOC_017740	Gpnmb	chr6:48986516-49008181	KO	WT	OK	8.06866	3.22204	-1.32435	-4.51836	5e-05	0.000399594	yes
XLOC_017767	XLOC_017767	Creb5	chr6:53237296-53650357	KO	WT	OK	6.11734	3.04265	-1.00758	-3.31277	5e-05	0.000399594	yes
XLOC_017777	XLOC_017777	Aqp1	chr6:55286292-55298549	KO	WT	OK	3.16638	18.8828	2.57616	8.45035	5e-05	0.000399594	yes
XLOC_017780	XLOC_017780	Adcyap1r1	chr6:55401971-55451449	KO	WT	OK	8.16369	17.1722	1.07278	4.37591	5e-05	0.000399594	yes
XLOC_017818	XLOC_017818	Mad2l1	chr6:66485214-66491101	KO	WT	OK	33.7356	75.795	1.16783	4.67364	5e-05	0.000399594	yes
XLOC_017838	XLOC_017838	Tmem150a	chr6:72305476-72316966	KO	WT	OK	29.1355	11.6704	-1.31993	-2.67833	0.0002	0.00138545	yes
XLOC_017839	XLOC_017839	Ggcx	chr6:72364301-72381100	KO	WT	OK	11.8859	5.29215	-1.16733	-4.14506	5e-05	0.000399594	yes
XLOC_017841	XLOC_017841	Capg	chr6:72494384-72512977	KO	WT	OK	148.945	56.6655	-1.39424	-5.79079	5e-05	0.000399594	yes
XLOC_017867	XLOC_017867	1700003E16Rik	chr6:83106397-83112969	KO	WT	OK	1.1089	0.261237	-2.0857	-2.67333	0.00355	0.0153551	yes
XLOC_017878	XLOC_017878	Zfp638	chr6:83864346-83936865	KO	WT	OK	7.07221	14.7175	1.0573	4.26005	5e-05	0.000399594	yes
XLOC_017931	XLOC_017931	Zxdc	chr6:90319487-90353480	KO	WT	OK	10.6243	5.18172	-1.03587	-3.84157	5e-05	0.000399594	yes
XLOC_017937	XLOC_017937	1810044D09Rik	chr6:91390980-91391749	KO	WT	OK	12.2973	3.67778	-1.74144	-2.71408	0.00185	0.00890595	yes
XLOC_017963	XLOC_017963	Lrrn1	chr6:107479719-107520222	KO	WT	OK	13.067	53.0151	2.02048	8.1668	5e-05	0.000399594	yes
XLOC_017967	XLOC_017967	Bhlhe40	chr6:108527029-108616919	KO	WT	OK	30.4531	8.44032	-1.85122	-7.12021	5e-05	0.000399594	yes
XLOC_018013	XLOC_018013	Cxcl12	chr6:117118552-117131386	KO	WT	OK	131.896	50.0668	-1.39748	-5.32058	5e-05	0.000399594	yes
XLOC_018030	XLOC_018030	Slc25a18	chr6:120723785-120744000	KO	WT	OK	1.5118	0.158195	-3.25649	-2.79033	0.0158	0.0505155	no
XLOC_018072	XLOC_018072	Cdca3	chr6:124780193-124783719	KO	WT	OK	18.7602	52.9221	1.4962	5.7931	5e-05	0.000399594	yes
XLOC_018101	XLOC_018101	Foxm1,Tex52	chr6:128313011-128335162	KO	WT	OK	17.6601	36.8964	1.06299	4.43784	5e-05	0.000399594	yes
XLOC_018111	XLOC_018111	Clec2d	chr6:129130632-129136553	KO	WT	OK	42.5094	12.4506	-1.77157	-6.09298	5e-05	0.000399594	yes
XLOC_018141	XLOC_018141	Crebl2	chr6:134780216-134807901	KO	WT	OK	2.41483	1.01156	-1.25534	-2.62697	0.001	0.0052909	yes
XLOC_018154	XLOC_018154	H2aj	chr6:136756768-136758595	KO	WT	OK	231.723	65.8885	-1.8143	-7.6554	5e-05	0.000399594	yes
XLOC_018184	XLOC_018184	Etfrf1	chr6:145159653-145165062	KO	WT	OK	31.1473	13.4232	-1.21438	-4.17163	5e-05	0.000399594	yes
XLOC_018185	XLOC_018185	Gm15706	chr6:145199048-145200369	KO	WT	OK	14.3239	3.6383	-1.97709	-4.50025	5e-05	0.000399594	yes
XLOC_018194	XLOC_018194	Arntl2	chr6:146754051-146782051	KO	WT	OK	3.02181	0.936263	-1.69042	-3.5864	5e-05	0.000399594	yes
XLOC_018197	XLOC_018197	Rep15	chr6:146981058-146982040	KO	WT	OK	0.200056	1.38246	2.78876	2.06945	0.0348	0.0941291	no
XLOC_018208	XLOC_018208	Resf1	chr6:149257935-149284185	KO	WT	OK	29.2255	11.6268	-1.32978	-5.48082	5e-05	0.000399594	yes
XLOC_018212	XLOC_018212	Calcr	chr6:3635679-3714713	KO	WT	OK	1.32371	0.526065	-1.33127	-2.49933	0.00085	0.00464294	yes
XLOC_018215	XLOC_018215	Tfpi2	chr6:3912588-3938858	KO	WT	OK	2.94793	1.31178	-1.16817	-2.17125	0.00375	0.016038	yes
XLOC_018225	XLOC_018225	Slc25a13	chr6:5991217-6167173	KO	WT	OK	1.71788	4.09004	1.25149	3.36927	5e-05	0.000399594	yes
XLOC_018230	XLOC_018230	Asns	chr6:7625164-7643209	KO	WT	OK	48.1005	102.527	1.09188	4.56725	5e-05	0.000399594	yes
XLOC_018300	XLOC_018300	Wdr91	chr6:34830425-34860831	KO	WT	OK	26.0936	9.26674	-1.49356	-5.69425	5e-05	0.000399594	yes
XLOC_018314	XLOC_018314	Klrg2	chr6:38576659-38587239	KO	WT	OK	2.29672	0.688877	-1.73726	-3.21831	0.00025	0.00166535	yes
XLOC_018374	XLOC_018374	Tmem176b	chr6:48783810-48791373	KO	WT	OK	108.349	41.9163	-1.37011	-5.41079	5e-05	0.000399594	yes
XLOC_018401	XLOC_018401	Jazf1	chr6:52718061-53018618	KO	WT	OK	2.20738	0.902343	-1.29059	-2.7347	0.00075	0.00420171	yes
XLOC_018407	XLOC_018407	Nod1	chr6:54873935-54922606	KO	WT	OK	5.07377	2.39493	-1.08307	-3.51943	5e-05	0.000399594	yes
XLOC_018408	XLOC_018408	Ggct	chr6:54935088-54942861	KO	WT	OK	13.4738	5.76579	-1.22457	-3.60976	5e-05	0.000399594	yes
XLOC_018455	XLOC_018455	Smyd1	chr6:71163933-71212275	KO	WT	OK	1.41824	6.90497	2.28353	6.30907	5e-05	0.000399594	yes
XLOC_018489	XLOC_018489	Sema4f	chr6:82861878-82889763	KO	WT	OK	3.69894	0.577885	-2.67826	-6.14511	5e-05	0.000399594	yes
XLOC_018505	XLOC_018505	1700124L16Rik	chr6:83711752-83712502	KO	WT	OK	1.20944	0	#NAME?	#NAME?	0.01755	0.054906	no
XLOC_018514	XLOC_018514	Mir705,Rab11fip5	chr6:85284955-85324628	KO	WT	OK	12.9938	6.22261	-1.06223	-3.02483	5e-05	0.000399594	yes
XLOC_018541	XLOC_018541	Prokr1	chr6:87528585-87540737	KO	WT	OK	1.66927	0.69987	-1.25406	-2.83063	0.00035	0.00220107	yes
XLOC_018547	XLOC_018547	H1f10	chr6:87930414-87931476	KO	WT	OK	11.0018	27.9736	1.34632	4.23801	5e-05	0.000399594	yes
XLOC_018594	XLOC_018594	Frmd4b	chr6:97236860-97567651	KO	WT	OK	2.49608	1.15518	-1.11154	-3.19062	5e-05	0.000399594	yes
XLOC_018602	XLOC_018602	Pdzrn3	chr6:101099600-101327891	KO	WT	OK	0.797447	1.80184	1.17601	2.78185	0.0003	0.00192981	yes
XLOC_018640	XLOC_018640	Plxnd1	chr6:115904828-115945023	KO	WT	OK	81.432	40.285	-1.01535	-4.3427	5e-05	0.000399594	yes
XLOC_018643	XLOC_018643	Alox5	chr6:116360088-116411196	KO	WT	OK	73.9083	22.4903	-1.71643	-6.90813	5e-05	0.000399594	yes
XLOC_018677	XLOC_018677	Apobec1	chr6:122527809-122552462	KO	WT	OK	6.62419	1.45032	-2.19137	-5.51701	5e-05	0.000399594	yes
XLOC_018697	XLOC_018697	Grcc10	chr6:124689200-124691087	KO	WT	OK	186.089	89.4892	-1.0562	-4.03857	5e-05	0.000399594	yes
XLOC_018701	XLOC_018701	Tpi1	chr6:124758678-124764176	KO	WT	OK	131.503	267.646	1.02523	4.25484	5e-05	0.000399594	yes
XLOC_018708	XLOC_018708	Ptms	chr6:124863692-124875862	KO	WT	OK	161.538	336.089	1.05697	4.51477	5e-05	0.000399594	yes
XLOC_018712	XLOC_018712	Ncapd2	chr6:125118024-125141604	KO	WT	OK	34.3597	93.1046	1.43813	6.11759	5e-05	0.000399594	yes
XLOC_018729	XLOC_018729	Ccnd2	chr6:127075726-127162437	KO	WT	OK	17.5415	8.74024	-1.00503	-4.01134	5e-05	0.000399594	yes
XLOC_018803	XLOC_018803	Dusp16	chr6:134665485-134771438	KO	WT	OK	18.9955	9.16869	-1.05087	-4.19819	5e-05	0.000399594	yes
XLOC_018808	XLOC_018808	Pbp2	chr6:135259146-135260402	KO	WT	OK	1.19441	0.414662	-1.52629	-1.75047	0.02405	0.0703734	no
XLOC_018809	XLOC_018809	Gm36582	chr6:135262172-135269579	KO	WT	OK	1.20039	0.425553	-1.4961	-2.46282	0.0021	0.00989952	yes
XLOC_018846	XLOC_018846	Bcat1	chr6:144942354-145024677	KO	WT	OK	4.97656	12.6889	1.35034	5.34211	5e-05	0.000399594	yes
XLOC_018961	XLOC_018961	Rnf225	chr7:13512764-13516421	KO	WT	OK	0.41624	1.00736	1.27508	2.26059	0.0036	0.0155373	yes
XLOC_018991	XLOC_018991	Prkd2	chr7:17428250-17455810	KO	WT	OK	5.00194	2.48692	-1.00813	-3.13483	5e-05	0.000399594	yes
XLOC_018994	XLOC_018994	Ptgir	chr7:17491838-17496254	KO	WT	OK	0.54266	1.57977	1.54159	3.12865	0.0001	0.000747562	yes
XLOC_018995	XLOC_018995	Pnmal2	chr7:17530030-17534177	KO	WT	OK	2.80544	7.75252	1.46644	4.94799	5e-05	0.000399594	yes
XLOC_019031	XLOC_019031	Rtn2	chr7:19867972-19881513	KO	WT	OK	128.999	62.0478	-1.05591	-4.2757	5e-05	0.000399594	yes
XLOC_019033	XLOC_019033	Ppp1r13l	chr7:19946564-19963882	KO	WT	OK	16.4288	7.55105	-1.12148	-4.21555	5e-05	0.000399594	yes
XLOC_019036	XLOC_019036	Exoc3l2	chr7:20048635-20082111	KO	WT	OK	1.03717	0.152921	-2.76179	-3.8146	0.00045	0.0027268	yes
XLOC_019039	XLOC_019039	Zfp296	chr7:20162635-20166005	KO	WT	OK	4.4537	2.15879	-1.04479	-2.38448	0.0018	0.00871501	yes
XLOC_019094	XLOC_019094	Zfp93	chr7:25053002-25062813	KO	WT	OK	4.52604	1.78313	-1.34384	-3.74058	5e-05	0.000399594	yes
XLOC_019096	XLOC_019096	Kcnn4	chr7:25155281-25170231	KO	WT	OK	6.19541	13.3842	1.11126	3.69756	5e-05	0.000399594	yes
XLOC_019100	XLOC_019100	Zfp428	chr7:25292105-25300701	KO	WT	OK	10.9169	27.0977	1.3116	4.42373	5e-05	0.000399594	yes
XLOC_019146	XLOC_019146	Sertad3	chr7:28258858-28262383	KO	WT	OK	14.8954	6.39007	-1.22096	-3.61005	5e-05	0.000399594	yes
XLOC_019160	XLOC_019160	9530053A07Rik	chr7:28914484-28949830	KO	WT	OK	3.09904	0.775794	-1.99807	-5.99876	5e-05	0.000399594	yes
XLOC_019188	XLOC_019188	Ppp1r14a	chr7:30074338-30078409	KO	WT	OK	20.0656	2.54954	-2.97642	-4.5133	5e-05	0.000399594	yes
XLOC_019212	XLOC_019212	Gm38670,Hspb6	chr7:31337558-31344665	KO	WT	OK	4.04317	13.5081	1.74027	3.15886	5e-05	0.000399594	yes
XLOC_019218	XLOC_019218	Sbsn	chr7:31536489-31541153	KO	WT	OK	5.78971	0.804277	-2.84773	-3.43231	0.00025	0.00166535	yes
XLOC_019248	XLOC_019248	Zfp939	chr7:46704880-46732786	KO	WT	OK	2.08261	0.896969	-1.21527	-2.40018	0.0015	0.00750254	yes
XLOC_019313	XLOC_019313	5430431A17Rik	chr7:51739886-51740783	KO	WT	OK	1.6324	6.92979	2.08582	3.26297	0.0004	0.00247463	yes
XLOC_019314	XLOC_019314	Fam71e1	chr7:51751964-51780039	KO	WT	OK	1.1926	0.208821	-2.51376	-1.3949	0.00915	0.0328587	yes
XLOC_019334	XLOC_019334	Tead2	chr7:52471122-52488989	KO	WT	OK	13.0019	47.1412	1.85827	7.31137	5e-05	0.000399594	yes
XLOC_019351	XLOC_019351	Mamstr	chr7:52895346-52901138	KO	WT	OK	3.7199	7.53292	1.01795	3.11641	5e-05	0.000399594	yes
XLOC_019354	XLOC_019354	Dbp	chr7:52960616-52973372	KO	WT	OK	11.6477	2.15541	-2.43401	-3.35396	0.00025	0.00166535	yes
XLOC_019362	XLOC_019362	Otog	chr7:53496356-53566804	KO	WT	OK	1.06368	2.45741	1.20808	4.05221	5e-05	0.000399594	yes
XLOC_019371	XLOC_019371	Tmem86a	chr7:54306009-54310146	KO	WT	OK	21.9143	7.21249	-1.6033	-5.34805	5e-05	0.000399594	yes
XLOC_019398	XLOC_019398	Otud7a	chr7:70589657-70903913	KO	WT	OK	2.43311	1.00544	-1.27497	-3.00504	0.0002	0.00138545	yes
XLOC_019427	XLOC_019427	Rgma	chr7:80455265-80564785	KO	WT	OK	15.4198	7.09861	-1.11917	-4.2641	5e-05	0.000399594	yes
XLOC_019428	XLOC_019428	Fam174b	chr7:80885192-80921805	KO	WT	OK	0.697437	1.59694	1.19517	2.28703	0.0034	0.0148368	yes
XLOC_019449	XLOC_019449	Sema4b	chr7:87331726-87371410	KO	WT	OK	14.6675	6.14676	-1.25473	-4.76548	5e-05	0.000399594	yes
XLOC_019454	XLOC_019454	Prc1	chr7:87439336-87461145	KO	WT	OK	33.4456	92.1662	1.46242	6.08214	5e-05	0.000399594	yes
XLOC_019455	XLOC_019455	Hddc3	chr7:87488022-87490983	KO	WT	OK	3.57807	1.34958	-1.40667	-2.21227	0.00635	0.0245594	yes
XLOC_019459	XLOC_019459	Alpk3	chr7:88202485-88250498	KO	WT	OK	1.09131	2.21938	1.0241	3.13265	0.0001	0.000747562	yes
XLOC_019461	XLOC_019461	Pde8a	chr7:88358150-88479421	KO	WT	OK	6.27587	2.13477	-1.55574	-4.97479	5e-05	0.000399594	yes
XLOC_019462	XLOC_019462	2900076A07Rik	chr7:88668435-88676384	KO	WT	OK	3.53262	1.26004	-1.48727	-1.93294	0.01075	0.0373324	yes
XLOC_019476	XLOC_019476	Gm2115	chr7:91677463-91726849	KO	WT	OK	3.29257	6.84415	1.05566	2.95607	5e-05	0.000399594	yes
XLOC_019503	XLOC_019503	Ccdc90b	chr7:99709658-99730804	KO	WT	OK	30.4825	14.853	-1.03723	-3.81127	5e-05	0.000399594	yes
XLOC_019506	XLOC_019506	Fam181b	chr7:100228388-100230231	KO	WT	OK	2.51558	0.935152	-1.42762	-2.65937	0.0014	0.00709253	yes
XLOC_019525	XLOC_019525	Wnt11	chr7:105983621-106003257	KO	WT	OK	3.70959	1.01224	-1.87371	-4.2796	5e-05	0.000399594	yes
XLOC_019527	XLOC_019527	Gdpd5	chr7:106530027-106610384	KO	WT	OK	8.74066	1.92647	-2.18178	-7.06535	5e-05	0.000399594	yes
XLOC_019535	XLOC_019535	Lipt2	chr7:107307786-107309441	KO	WT	OK	4.8123	10.1546	1.07734	2.802	0.00035	0.00220107	yes
XLOC_019548	XLOC_019548	Arap1	chr7:108496582-108561100	KO	WT	OK	8.76065	4.25863	-1.04065	-3.87933	5e-05	0.000399594	yes
XLOC_019551	XLOC_019551	Clpb	chr7:108812264-108943974	KO	WT	OK	32.9149	16.141	-1.02801	-4.25385	5e-05	0.000399594	yes
XLOC_019681	XLOC_019681	Adm	chr7:117771170-117773334	KO	WT	OK	16.6879	4.39095	-1.9262	-5.49905	5e-05	0.000399594	yes
XLOC_019682	XLOC_019682	Ampd3	chr7:117911719-117955922	KO	WT	OK	53.7564	21.367	-1.33106	-5.61008	5e-05	0.000399594	yes
XLOC_019691	XLOC_019691	Arntl	chr7:120350978-120457640	KO	WT	OK	15.6389	7.29544	-1.10007	-4.04337	5e-05	0.000399594	yes
XLOC_019738	XLOC_019738	Plk1	chr7:129302948-129313398	KO	WT	OK	19.93	76.2569	1.93592	7.89067	5e-05	0.000399594	yes
XLOC_019740	XLOC_019740	Prkcb	chr7:129432638-129777915	KO	WT	OK	4.86968	1.90985	-1.35037	-4.8044	5e-05	0.000399594	yes
XLOC_019750	XLOC_019750	Il4ra	chr7:132695784-132722988	KO	WT	OK	24.9159	11.4969	-1.11582	-4.68324	5e-05	0.000399594	yes
XLOC_019761	XLOC_019761	Ypel3	chr7:133920488-133924028	KO	WT	OK	21.5701	7.86231	-1.45601	-4.26877	5e-05	0.000399594	yes
XLOC_019765	XLOC_019765	Hirip3	chr7:133991066-134008636	KO	WT	OK	21.1633	43.4066	1.03635	3.13548	5e-05	0.000399594	yes
XLOC_019770	XLOC_019770	Mylpf	chr7:134352412-134357801	KO	WT	OK	4.11314	24.7932	2.59163	5.84834	5e-05	0.000399594	yes
XLOC_019784	XLOC_019784	Fbxl19	chr7:134889791-134912997	KO	WT	OK	7.41454	15.2741	1.04265	4.02233	5e-05	0.000399594	yes
XLOC_019787	XLOC_019787	Hsd3b7	chr7:134944122-134947316	KO	WT	OK	4.61842	1.86748	-1.3063	-3.03559	0.00015	0.00107374	yes
XLOC_019793	XLOC_019793	Trim72	chr7:135147891-135154907	KO	WT	OK	0.230856	1.32936	2.52567	3.39366	0.0006	0.00349059	yes
XLOC_019810	XLOC_019810	Htra1	chr7:138079716-138129172	KO	WT	OK	14.0205	4.14478	-1.75817	-5.39592	5e-05	0.000399594	yes
XLOC_019835	XLOC_019835	Mgmt	chr7:144086293-144319871	KO	WT	OK	71.2858	23.9455	-1.57386	-5.55082	5e-05	0.000399594	yes
XLOC_019846	XLOC_019846	Adgra1	chr7:147020072-147063987	KO	WT	OK	0.642532	3.22615	2.32797	5.85082	5e-05	0.000399594	yes
XLOC_019903	XLOC_019903	Tnni2	chr7:149627720-149630315	KO	WT	OK	1.10468	6.22793	2.49512	3.55393	0.00035	0.00220107	yes
XLOC_019904	XLOC_019904	Lsp1	chr7:149646716-149701914	KO	WT	OK	6.201	29.3295	2.24178	6.61026	5e-05	0.000399594	yes
XLOC_019905	XLOC_019905	Tnnt3	chr7:149646716-149701914	KO	WT	OK	2.00717	15.8266	2.97911	3.32993	5e-05	0.000399594	yes
XLOC_019942	XLOC_019942	Cdc42ep5	chr7:4102861-4116307	KO	WT	OK	53.6368	20.2083	-1.40827	-4.90626	5e-05	0.000399594	yes
XLOC_019947	XLOC_019947	Tnnt1	chr7:4456171-4467577	KO	WT	OK	0.98943	7.05955	2.83491	4.55008	5e-05	0.000399594	yes
XLOC_019956	XLOC_019956	Cox6b2	chr7:4703393-4704696	KO	WT	OK	19.5982	7.4503	-1.39535	-2.91638	0.00015	0.00107374	yes
XLOC_019960	XLOC_019960	Ube2s	chr7:4759615-4763942	KO	WT	OK	78.0369	198.293	1.3454	5.59348	5e-05	0.000399594	yes
XLOC_019965	XLOC_019965	Sbk3	chr7:4916861-4922563	KO	WT	OK	0.190605	1.30663	2.77719	4.00285	0.0003	0.00192981	yes
XLOC_020098	XLOC_020098	Relb	chr7:20191570-20214787	KO	WT	OK	22.3597	9.70775	-1.20369	-4.42693	5e-05	0.000399594	yes
XLOC_020202	XLOC_020202	Lipe	chr7:26161837-26351436	KO	WT	OK	1.24794	0.58064	-1.10383	-2.05362	0.0064	0.0247204	yes
XLOC_020278	XLOC_020278	Arhgap33	chr7:31307244-31320079	KO	WT	OK	0.744605	1.52414	1.03344	2.51053	0.0014	0.00709253	yes
XLOC_020301	XLOC_020301	Fxyd5	chr7:31817741-31827350	KO	WT	OK	52.6947	17.4916	-1.591	-5.76967	5e-05	0.000399594	yes
XLOC_020307	XLOC_020307	Scn1b	chr7:31901542-31912042	KO	WT	OK	34.992	14.284	-1.29263	-4.74368	5e-05	0.000399594	yes
XLOC_020345	XLOC_020345	Ccne1	chr7:38883002-38892509	KO	WT	OK	13.536	33.2187	1.29519	4.95589	5e-05	0.000399594	yes
XLOC_020391	XLOC_020391	Cpt1c	chr7:52214741-52230221	KO	WT	OK	28.2355	13.0439	-1.11413	-4.35317	5e-05	0.000399594	yes
XLOC_020415	XLOC_020415	Snrnp70	chr7:52631823-52651112	KO	WT	OK	93.3675	195.392	1.06538	4.11469	5e-05	0.000399594	yes
XLOC_020432	XLOC_020432	Kcnj14	chr7:53071836-53080117	KO	WT	OK	2.97182	0.238566	-3.63889	-5.42947	5e-05	0.000399594	yes
XLOC_020469	XLOC_020469	E2f8	chr7:56121798-56141978	KO	WT	OK	8.81665	26.1693	1.56957	6.25702	5e-05	0.000399594	yes
XLOC_020474	XLOC_020474	Svip	chr7:59252530-59261388	KO	WT	OK	2.77396	1.02285	-1.43936	-3.20318	5e-05	0.000399594	yes
XLOC_020510	XLOC_020510	Peg12	chr7:69606756-69609396	KO	WT	OK	10.7741	23.066	1.0982	4.18621	5e-05	0.000399594	yes
XLOC_020511	XLOC_020511	Chrna7	chr7:70243577-70357412	KO	WT	OK	0.508599	1.86634	1.87561	3.07105	0.0004	0.00247463	yes
XLOC_020526	XLOC_020526	Lrrc28	chr7:74658295-74790122	KO	WT	OK	23.9415	8.92452	-1.42367	-5.25841	5e-05	0.000399594	yes
XLOC_020527	XLOC_020527	Synm	chr7:74875046-74904628	KO	WT	OK	1.09726	0.516821	-1.08617	-2.38011	0.0013	0.00666024	yes
XLOC_020541	XLOC_020541	St8sia2	chr7:81084005-81158568	KO	WT	OK	9.79348	27.9432	1.5126	6.22928	5e-05	0.000399594	yes
XLOC_020559	XLOC_020559	Anpep	chr7:86966688-86993096	KO	WT	OK	4.49774	1.58446	-1.50521	-4.41711	5e-05	0.000399594	yes
XLOC_020563	XLOC_020563	Idh2	chr7:87239733-87260236	KO	WT	OK	33.6078	106.69	1.66656	6.8637	5e-05	0.000399594	yes
XLOC_020577	XLOC_020577	Cpeb1	chr7:88491911-88599644	KO	WT	OK	17.4155	5.66856	-1.61931	-5.88651	5e-05	0.000399594	yes
XLOC_020595	XLOC_020595	Arnt2	chr7:91394784-91558548	KO	WT	OK	2.90859	6.76967	1.21877	4.43505	5e-05	0.000399594	yes
XLOC_020596	XLOC_020596	Fah	chr7:91733669-91754452	KO	WT	OK	22.1944	7.88973	-1.49215	-5.10313	5e-05	0.000399594	yes
XLOC_020669	XLOC_020669	Plekhb1	chr7:107792409-107810908	KO	WT	OK	1.25463	0.243041	-2.36799	-2.19406	0.0007	0.00397059	yes
XLOC_020682	XLOC_020682	Lrrc51	chr7:109061502-109082371	KO	WT	OK	8.8533	2.19347	-2.013	-3.99559	5e-05	0.000399594	yes
XLOC_020683	XLOC_020683	Il18bp	chr7:109163587-109166746	KO	WT	OK	6.96089	1.96575	-1.82419	-4.18007	5e-05	0.000399594	yes
XLOC_020748	XLOC_020748	Trim12a	chr7:111448410-111473352	KO	WT	OK	1.87145	0.856238	-1.12807	-1.84098	0.00615	0.0239428	yes
XLOC_020749	XLOC_020749	Trim12c	chr7:111487267-111501872	KO	WT	OK	1.08454	0.45331	-1.25851	-2.30156	0.00235	0.0108782	yes
XLOC_020772	XLOC_020772	Cavin3	chr7:112629129-112630711	KO	WT	OK	15.747	43.4085	1.4629	5.14443	5e-05	0.000399594	yes
XLOC_020779	XLOC_020779	Tpp1	chr7:112893329-112900749	KO	WT	OK	61.2857	20.1219	-1.60678	-6.70255	5e-05	0.000399594	yes
XLOC_020780	XLOC_020780	Dchs1	chr7:112901502-112936064	KO	WT	OK	7.66454	3.79823	-1.01287	-4.07911	5e-05	0.000399594	yes
XLOC_020866	XLOC_020866	Plekha7	chr7:123266998-123451890	KO	WT	OK	1.82622	0.586819	-1.63787	-3.92306	5e-05	0.000399594	yes
XLOC_020870	XLOC_020870	Arl6ip1	chr7:125262403-125273139	KO	WT	OK	66.4655	149.86	1.17294	4.96186	5e-05	0.000399594	yes
XLOC_020872	XLOC_020872	Syt17	chr7:125524226-125591736	KO	WT	OK	2.47586	0.966258	-1.35745	-3.17646	5e-05	0.000399594	yes
XLOC_020915	XLOC_020915	Atp2a1	chr7:133572280-133606587	KO	WT	OK	0.738188	2.58197	1.80641	1.94572	0.01145	0.0392895	yes
XLOC_020922	XLOC_020922	Nupr1	chr7:133766759-133768984	KO	WT	OK	4.41424	11.2994	1.35601	2.78272	0.00045	0.0027268	yes
XLOC_020934	XLOC_020934	Mvp	chr7:134130373-134158108	KO	WT	OK	25.7952	11.8337	-1.1242	-4.41076	5e-05	0.000399594	yes
XLOC_020938	XLOC_020938	Kif22	chr7:134171244-134185934	KO	WT	OK	17.7551	53.0555	1.57927	6.29834	5e-05	0.000399594	yes
XLOC_020987	XLOC_020987	Fam53b	chr7:139903766-140004879	KO	WT	OK	16.4744	6.19841	-1.41026	-5.55081	5e-05	0.000399594	yes
XLOC_021000	XLOC_021000	Mki67	chr7:142881470-142908062	KO	WT	OK	27.8507	62.6696	1.17005	4.86526	5e-05	0.000399594	yes
XLOC_021014	XLOC_021014	Adam8	chr7:147164830-147178461	KO	WT	OK	5.75869	2.47916	-1.21589	-3.75822	5e-05	0.000399594	yes
XLOC_021037	XLOC_021037	Ifitm3	chr7:148195488-148196643	KO	WT	OK	1006.94	196.248	-2.35923	-9.82142	5e-05	0.000399594	yes
XLOC_021051	XLOC_021051	Cend1	chr7:148612344-148615461	KO	WT	OK	0.243429	1.05779	2.11948	2.49486	0.00355	0.0153551	yes
XLOC_021069	XLOC_021069	Ifitm10	chr7:149512014-149559651	KO	WT	OK	41.3882	12.2198	-1.76	-6.10176	5e-05	0.000399594	yes
XLOC_021071	XLOC_021071	Prr33	chr7:149646716-149701914	KO	WT	OK	1.08013	4.22518	1.96781	2.31221	0.00175	0.00855717	yes
XLOC_021073	XLOC_021073	H19,Mir675	chr7:149761434-149764051	KO	WT	OK	114.864	648.7	2.49763	9.92811	5e-05	0.000399594	yes
XLOC_021074	XLOC_021074	Igf2	chr7:149836672-149856261	KO	WT	OK	8.11367	27.6177	1.76717	6.65905	5e-05	0.000399594	yes
XLOC_021088	XLOC_021088	Tnfrsf26	chr7:150793589-150813750	KO	WT	OK	2.97942	0.0984654	-4.91927	-5.34734	0.0012	0.00620447	yes
XLOC_021090	XLOC_021090	Tnfrsf23	chr7:150813974-150871780	KO	WT	OK	21.7513	5.97506	-1.86408	-5.05661	5e-05	0.000399594	yes
XLOC_021093	XLOC_021093	Mrgpre	chr7:150964267-150970405	KO	WT	OK	0.617847	1.38332	1.16281	2.45571	0.00115	0.00598527	yes
XLOC_021160	XLOC_021160	Cln8	chr8:14888535-14901719	KO	WT	OK	15.8503	7.18145	-1.14216	-4.5997	5e-05	0.000399594	yes
XLOC_021162	XLOC_021162	Kbtbd11	chr8:15011024-15033332	KO	WT	OK	12.888	6.4244	-1.0044	-4.02393	5e-05	0.000399594	yes
XLOC_021163	XLOC_021163	Myom2	chr8:15057652-15133419	KO	WT	OK	1.82602	0.379955	-2.2648	-4.84133	5e-05	0.000399594	yes
XLOC_021247	XLOC_021247	Rnf122	chr8:32222298-32243790	KO	WT	OK	0.352268	1.17785	1.74141	3.55803	5e-05	0.000399594	yes
XLOC_021252	XLOC_021252	Purg	chr8:34496796-34527941	KO	WT	OK	0.844913	2.42358	1.52027	2.68153	0.0008	0.00440859	yes
XLOC_021286	XLOC_021286	Pdlim3	chr8:46970840-47004984	KO	WT	OK	1.3486	4.01966	1.57561	3.28138	5e-05	0.000399594	yes
XLOC_021302	XLOC_021302	Aga	chr8:54597055-54608776	KO	WT	OK	35.1366	11.3781	-1.62671	-5.53207	5e-05	0.000399594	yes
XLOC_021313	XLOC_021313	2500002B13Rik	chr8:59966759-59989059	KO	WT	OK	4.21003	2.03856	-1.04628	-1.4728	0.0209	0.0629185	no
XLOC_021314	XLOC_021314	Hmgb2	chr8:59990639-59994796	KO	WT	OK	46.093	114.502	1.31276	5.53306	5e-05	0.000399594	yes
XLOC_021343	XLOC_021343	Gmip	chr8:72332585-72345769	KO	WT	OK	10.7584	5.30829	-1.01914	-3.78761	5e-05	0.000399594	yes
XLOC_021362	XLOC_021362	Isyna1	chr8:73118379-73121189	KO	WT	OK	13.555	32.2385	1.24996	4.65394	5e-05	0.000399594	yes
XLOC_021370	XLOC_021370	2010320M18Rik	chr8:73300760-73301505	KO	WT	OK	12.7652	6.30077	-1.01862	-2.40715	0.00095	0.00508332	yes
XLOC_021375	XLOC_021375	Gm10654	chr8:73455213-73456936	KO	WT	OK	0.382212	1.18243	1.62931	2.24562	0.0064	0.0247204	yes
XLOC_021381	XLOC_021381	Ankle1	chr8:73929910-73934441	KO	WT	OK	2.16635	6.50882	1.58713	4.55763	5e-05	0.000399594	yes
XLOC_021413	XLOC_021413	Hmox1	chr8:77617516-77624492	KO	WT	OK	677.466	276.753	-1.29155	-5.42915	5e-05	0.000399594	yes
XLOC_021430	XLOC_021430	Rnf150	chr8:85387254-85615170	KO	WT	OK	5.20535	1.64276	-1.66388	-5.99105	5e-05	0.000399594	yes
XLOC_021442	XLOC_021442	Asf1b	chr8:86479592-86494094	KO	WT	OK	16.1441	42.7966	1.40649	5.38597	5e-05	0.000399594	yes
XLOC_021470	XLOC_021470	Fbxw9	chr8:87560791-87591019	KO	WT	OK	34.8965	14.0471	-1.31281	-2.16225	0.0038	0.0162108	yes
XLOC_021478	XLOC_021478	Gpt2	chr8:88016474-88052801	KO	WT	OK	3.56303	9.92409	1.47783	5.32061	5e-05	0.000399594	yes
XLOC_021499	XLOC_021499	Mmp2	chr8:95351195-95377320	KO	WT	OK	67.2294	27.0132	-1.31543	-5.51651	5e-05	0.000399594	yes
XLOC_021506	XLOC_021506	Mt3	chr8:96676506-96678048	KO	WT	OK	1.08688	3.42446	1.65569	1.74408	0.04545	0.116099	no
XLOC_021507	XLOC_021507	Mt2	chr8:96696517-96697467	KO	WT	OK	322.346	138.868	-1.21489	-4.83097	5e-05	0.000399594	yes
XLOC_021524	XLOC_021524	Adgrg1	chr8:97501008-97538108	KO	WT	OK	4.06701	8.39404	1.0454	3.62144	5e-05	0.000399594	yes
XLOC_021525	XLOC_021525	Adgrg3	chr8:97541591-97569149	KO	WT	OK	1.64839	9.01662	2.45152	6.57133	5e-05	0.000399594	yes
XLOC_021540	XLOC_021540	Bean1	chr8:106694412-106742997	KO	WT	OK	1.37967	0.554423	-1.31527	-2.56015	0.00085	0.00464294	yes
XLOC_021548	XLOC_021548	Ces2c	chr8:107370967-107378382	KO	WT	OK	3.5087	0.295596	-3.56924	-5.03604	0.0001	0.000747562	yes
XLOC_021550	XLOC_021550	Ces2e	chr8:107450159-107458572	KO	WT	OK	31.821	0.990228	-5.00608	-11.7134	5e-05	0.000399594	yes
XLOC_021551	XLOC_021551	Ces2f	chr8:107471255-107479862	KO	WT	OK	1.26157	0	#NAME?	#NAME?	5e-05	0.000399594	yes
XLOC_021552	XLOC_021552	Ces2g	chr8:107485617-107493437	KO	WT	OK	27.45	1.45165	-4.24104	-11.9782	5e-05	0.000399594	yes
XLOC_021560	XLOC_021560	Hsf4	chr8:107793700-107799745	KO	WT	OK	2.00412	0.817613	-1.29348	-2.18069	0.0021	0.00989952	yes
XLOC_021614	XLOC_021614	Zfp612	chr8:112603633-112616652	KO	WT	OK	1.45725	0.72787	-1.0015	-2.40672	0.0013	0.00666024	yes
XLOC_021621	XLOC_021621	St3gal2	chr8:113443764-113496397	KO	WT	OK	25.68	12.8265	-1.00152	-4.09365	5e-05	0.000399594	yes
XLOC_021636	XLOC_021636	Wwox	chr8:116963551-117876612	KO	WT	OK	5.42517	2.40238	-1.17521	-3.22168	5e-05	0.000399594	yes
XLOC_021652	XLOC_021652	Necab2	chr8:121970618-121996535	KO	WT	OK	1.56488	0.137848	-3.5049	-3.61948	0.0033	0.0144807	yes
XLOC_021666	XLOC_021666	Foxc2	chr8:123640070-123642794	KO	WT	OK	4.14246	13.4524	1.69931	5.64115	5e-05	0.000399594	yes
XLOC_021674	XLOC_021674	Zfp469	chr8:124754173-124796550	KO	WT	OK	2.69547	0.874475	-1.62405	-5.76669	5e-05	0.000399594	yes
XLOC_021691	XLOC_021691	Dpep1	chr8:125710134-125725713	KO	WT	OK	1.12481	0.49077	-1.19656	-1.93075	0.0111	0.0383449	yes
XLOC_021696	XLOC_021696	Spire2	chr8:125856612-125893418	KO	WT	OK	1.30229	2.74889	1.0778	2.49238	0.0006	0.00349059	yes
XLOC_021745	XLOC_021745	Ctxn1	chr8:4257645-4259274	KO	WT	OK	39.3778	17.7198	-1.15202	-4.15746	5e-05	0.000399594	yes
XLOC_021748	XLOC_021748	Shcbp1	chr8:4735975-4779567	KO	WT	OK	10.8021	29.9431	1.47091	5.32352	5e-05	0.000399594	yes
XLOC_021853	XLOC_021853	Nrg1	chr8:32925022-33119976	KO	WT	OK	1.49828	0.513598	-1.5446	-1.64596	0.00955	0.0340466	yes
XLOC_021897	XLOC_021897	1700029J07Rik	chr8:47038955-47060606	KO	WT	OK	1.55009	0.677738	-1.19355	-2.00861	0.00745	0.0278202	yes
XLOC_021904	XLOC_021904	Stox2	chr8:48265401-48437702	KO	WT	OK	8.64526	3.53018	-1.29217	-5.08413	5e-05	0.000399594	yes
XLOC_021906	XLOC_021906	Ing2	chr8:48752531-48760513	KO	WT	OK	4.44125	9.3337	1.07148	3.51322	5e-05	0.000399594	yes
XLOC_021955	XLOC_021955	Slc25a42	chr8:72708238-72736180	KO	WT	OK	2.70636	1.10922	-1.28681	-3.06808	0.00015	0.00107374	yes
XLOC_021967	XLOC_021967	Pgpep1	chr8:73170334-73183637	KO	WT	OK	11.6075	3.56128	-1.70459	-6.24968	5e-05	0.000399594	yes
XLOC_021985	XLOC_021985	Ano8	chr8:73993092-74009966	KO	WT	OK	4.57233	11.9329	1.38394	2.17718	0.01045	0.0366029	yes
XLOC_022060	XLOC_022060	Neto2	chr8:88160616-88224920	KO	WT	OK	0.573934	1.96157	1.77305	4.18428	5e-05	0.000399594	yes
XLOC_022068	XLOC_022068	Zfp423	chr8:90185708-90483494	KO	WT	OK	1.47371	0.581902	-1.34061	-3.07392	0.00015	0.00107374	yes
XLOC_022121	XLOC_022121	Rrad	chr8:107151969-107155189	KO	WT	OK	83.1938	23.1854	-1.84326	-7.20575	5e-05	0.000399594	yes
XLOC_022123	XLOC_022123	B3gnt9	chr8:107749087-107779053	KO	WT	OK	9.4574	2.22323	-2.08879	-3.48389	5e-05	0.000399594	yes
XLOC_022152	XLOC_022152	Smpd3	chr8:108776447-108861865	KO	WT	OK	3.40336	1.62765	-1.06417	-3.30475	5e-05	0.000399594	yes
XLOC_022155	XLOC_022155	Cog8	chr8:109572608-109580637	KO	WT	OK	42.2008	18.7814	-1.16796	-4.62042	5e-05	0.000399594	yes
XLOC_022185	XLOC_022185	Mlkl	chr8:113835697-113862105	KO	WT	OK	17.8441	7.8459	-1.18544	-4.26304	5e-05	0.000399594	yes
XLOC_022189	XLOC_022189	Ctrb1	chr8:114210409-114214910	KO	WT	OK	0.377776	1.17674	1.63919	1.6029	0.0382	0.101192	no
XLOC_022221	XLOC_022221	A330074K22Rik	chr8:122728333-122752130	KO	WT	OK	0.385067	1.6214	2.07406	3.48306	0.00015	0.00107374	yes
XLOC_022234	XLOC_022234	Cyba	chr8:124948670-124956840	KO	WT	OK	23.1756	10.9376	-1.08331	-2.97053	0.0001	0.000747562	yes
XLOC_022251	XLOC_022251	Fanca	chr8:125748740-125842476	KO	WT	OK	4.73659	11.6062	1.29297	2.73299	0.00065	0.00373726	yes
XLOC_022367	XLOC_022367	Shfl	chr9:20673085-20684154	KO	WT	OK	3.86906	1.78681	-1.11459	-2.39179	0.00175	0.00855717	yes
XLOC_022370	XLOC_022370	Icam1	chr9:20820383-20833258	KO	WT	OK	4.36897	0.611722	-2.83635	-5.79666	5e-05	0.000399594	yes
XLOC_022403	XLOC_022403	Thyn1	chr9:26807261-26837679	KO	WT	OK	176.786	84.5073	-1.06486	-3.04119	5e-05	0.000399594	yes
XLOC_022409	XLOC_022409	Adamts8	chr9:30750146-30771423	KO	WT	OK	3.43171	0.981747	-1.8055	-4.8645	5e-05	0.000399594	yes
XLOC_022430	XLOC_022430	Fez1	chr9:36629475-36686509	KO	WT	OK	7.52962	1.71144	-2.13736	-5.17508	5e-05	0.000399594	yes
XLOC_022473	XLOC_022473	Vwa5a	chr9:38525852-38550922	KO	WT	OK	15.9456	6.16939	-1.36996	-5.24414	5e-05	0.000399594	yes
XLOC_022522	XLOC_022522	Thy1	chr9:43851466-43856662	KO	WT	OK	0.969024	8.42791	3.12057	6.56876	5e-05	0.000399594	yes
XLOC_022528	XLOC_022528	H2ax	chr9:44142797-44144156	KO	WT	OK	62.9276	141.614	1.1702	4.83687	5e-05	0.000399594	yes
XLOC_022559	XLOC_022559	Cadm1	chr9:47338252-47661474	KO	WT	OK	2.9487	6.00886	1.02701	3.39957	5e-05	0.000399594	yes
XLOC_022562	XLOC_022562	Gm5617	chr9:48303447-48304080	KO	WT	OK	18.9758	3.56868	-2.41069	-4.52419	5e-05	0.000399594	yes
XLOC_022650	XLOC_022650	Anp32a	chr9:62189149-62226609	KO	WT	OK	38.1866	78.6564	1.0425	4.35682	5e-05	0.000399594	yes
XLOC_022667	XLOC_022667	Igdcc4	chr9:64949292-64985754	KO	WT	OK	11.5132	4.08515	-1.49483	-5.75382	5e-05	0.000399594	yes
XLOC_022677	XLOC_022677	Pif1	chr9:65434966-65443774	KO	WT	OK	1.80006	7.51864	2.06242	6.11937	5e-05	0.000399594	yes
XLOC_022678	XLOC_022678	Rbpms2	chr9:65478388-65508325	KO	WT	OK	10.8837	30.8884	1.5049	5.60381	5e-05	0.000399594	yes
XLOC_022680	XLOC_022680	Pclaf	chr9:65676732-65756601	KO	WT	OK	39.0276	128.136	1.71511	6.21595	5e-05	0.000399594	yes
XLOC_022684	XLOC_022684	Dapk2	chr9:66006032-66120049	KO	WT	OK	77.0368	30.2725	-1.34754	-5.50616	5e-05	0.000399594	yes
XLOC_022692	XLOC_022692	Rora	chr9:68501592-69236053	KO	WT	OK	3.37894	1.26346	-1.41919	-3.02437	0.00015	0.00107374	yes
XLOC_022704	XLOC_022704	Aldh1a2	chr9:71063595-71144050	KO	WT	OK	2.55545	0.482655	-2.40451	-4.20944	5e-05	0.000399594	yes
XLOC_022706	XLOC_022706	Mns1	chr9:72286335-72339766	KO	WT	OK	7.85567	16.7433	1.09178	3.11412	5e-05	0.000399594	yes
XLOC_022720	XLOC_022720	Fam214a	chr9:74800686-74880275	KO	WT	OK	7.47938	2.73043	-1.45379	-4.92732	5e-05	0.000399594	yes
XLOC_022756	XLOC_022756	Ttk	chr9:83728295-83765997	KO	WT	OK	6.79017	17.0668	1.32967	4.78292	5e-05	0.000399594	yes
XLOC_022759	XLOC_022759	Tpbg	chr9:85735986-85740662	KO	WT	OK	9.56971	21.2143	1.14849	4.48073	5e-05	0.000399594	yes
XLOC_022773	XLOC_022773	Mthfs	chr9:89106027-89135063	KO	WT	OK	6.24055	2.2262	-1.48709	-2.54473	0.0018	0.00871501	yes
XLOC_022776	XLOC_022776	Ctsh	chr9:89949104-89970933	KO	WT	OK	21.1923	8.87789	-1.25525	-4.34067	5e-05	0.000399594	yes
XLOC_022807	XLOC_022807	Cep70	chr9:99143759-99205148	KO	WT	OK	1.62354	3.26399	1.00749	2.52641	0.00055	0.00324124	yes
XLOC_022821	XLOC_022821	Slco2a1	chr9:102910816-102998331	KO	WT	OK	17.9292	4.5257	-1.98609	-7.41816	5e-05	0.000399594	yes
XLOC_022841	XLOC_022841	Abhd14b	chr9:106350970-106355249	KO	WT	OK	5.04094	2.344	-1.10472	-2.49699	0.0009	0.00486651	yes
XLOC_022842	XLOC_022842	Pcbp4	chr9:106356168-106368271	KO	WT	OK	55.8638	114.73	1.03826	4.40662	5e-05	0.000399594	yes
XLOC_022858	XLOC_022858	Hyal1,Hyal3,Naa80	chr9:107479280-107489690	KO	WT	OK	18.2987	7.24756	-1.33617	-4.12921	5e-05	0.000399594	yes
XLOC_022864	XLOC_022864	Traip	chr9:107853293-107874599	KO	WT	OK	5.17736	10.5588	1.02816	3.56823	5e-05	0.000399594	yes
XLOC_022877	XLOC_022877	1700102P08Rik	chr9:108295164-108300098	KO	WT	OK	5.22931	0.300949	-4.11903	-4.45241	0.0012	0.00620447	yes
XLOC_022931	XLOC_022931	Dclk3	chr9:111341584-111392115	KO	WT	OK	1.24995	0.332407	-1.91085	-3.46161	0.00025	0.00166535	yes
XLOC_022936	XLOC_022936	Susd5	chr9:113966471-114007851	KO	WT	OK	0.982121	3.07137	1.64491	4.23974	5e-05	0.000399594	yes
XLOC_022980	XLOC_022980	Zfp651	chr9:121669150-121680860	KO	WT	OK	3.54414	1.70848	-1.05272	-3.50836	5e-05	0.000399594	yes
XLOC_022981	XLOC_022981	Klhl40	chr9:121686724-121692937	KO	WT	OK	0.533713	1.89969	1.83163	3.169	0.0001	0.000747562	yes
XLOC_023017	XLOC_023017	Birc3	chr9:7848700-7873170	KO	WT	OK	7.79046	1.72376	-2.17615	-6.10482	5e-05	0.000399594	yes
XLOC_023019	XLOC_023019	Cfap300	chr9:8021671-8042875	KO	WT	OK	9.04494	3.84284	-1.23494	-3.38739	5e-05	0.000399594	yes
XLOC_023031	XLOC_023031	Fut4	chr9:14552902-14556566	KO	WT	OK	20.3455	4.7682	-2.0932	-7.61776	5e-05	0.000399594	yes
XLOC_023067	XLOC_023067	Col5a3	chr9:20574500-20619511	KO	WT	OK	1.36943	2.92632	1.09552	3.52794	5e-05	0.000399594	yes
XLOC_023089	XLOC_023089	Spc24	chr9:21559883-21564747	KO	WT	OK	33.1473	86.4724	1.38335	5.54285	5e-05	0.000399594	yes
XLOC_023108	XLOC_023108	Anln	chr9:22135657-22193650	KO	WT	OK	27.1209	68.5711	1.3382	5.63376	5e-05	0.000399594	yes
XLOC_023122	XLOC_023122	St14	chr9:30896174-30939384	KO	WT	OK	11.9693	1.40766	-3.08797	-9.25819	5e-05	0.000399594	yes
XLOC_023135	XLOC_023135	Hyls1	chr9:35366144-35377654	KO	WT	OK	2.59619	8.93868	1.78366	2.93149	0.00055	0.00324124	yes
XLOC_023156	XLOC_023156	Robo3	chr9:37223629-37240760	KO	WT	OK	4.82399	0.59838	-3.01109	-7.64625	5e-05	0.000399594	yes
XLOC_023256	XLOC_023256	Ttc12	chr9:49245065-49294330	KO	WT	OK	3.36443	1.52875	-1.138	-3.18037	5e-05	0.000399594	yes
XLOC_023257	XLOC_023257	Ncam1	chr9:49310233-49607498	KO	WT	OK	147.45	70.6511	-1.06144	-4.44001	5e-05	0.000399594	yes
XLOC_023272	XLOC_023272	4833427G06Rik	chr9:50889417-50910183	KO	WT	OK	6.01474	1.88446	-1.67435	-2.85342	0.00085	0.00464294	yes
XLOC_023275	XLOC_023275	Colca2	chr9:51078362-51086659	KO	WT	OK	2.05901	0.434337	-2.24506	-2.89484	0.0027	0.012258	yes
XLOC_023294	XLOC_023294	Acsbg1	chr9:54452803-54509692	KO	WT	OK	15.5037	6.97754	-1.15182	-4.22753	5e-05	0.000399594	yes
XLOC_023304	XLOC_023304	Peak1	chr9:56048935-56265857	KO	WT	OK	37.6797	16.832	-1.16258	-4.9619	5e-05	0.000399594	yes
XLOC_023324	XLOC_023324	Islr	chr9:58004070-58007028	KO	WT	OK	0.694996	2.81069	2.01585	3.72107	5e-05	0.000399594	yes
XLOC_023332	XLOC_023332	Bbs4	chr9:59169772-59201315	KO	WT	OK	5.06654	2.52635	-1.00395	-2.92397	5e-05	0.000399594	yes
XLOC_023344	XLOC_023344	Kif23	chr9:61765084-61794606	KO	WT	OK	13.4257	38.057	1.50316	6.04961	5e-05	0.000399594	yes
XLOC_023349	XLOC_023349	Coro2b	chr9:62267298-62384851	KO	WT	OK	0.683282	1.59535	1.22332	2.70864	0.0007	0.00397059	yes
XLOC_023355	XLOC_023355	2300009A05Rik	chr9:63242253-63247051	KO	WT	OK	45.697	18.2223	-1.32639	-3.76618	5e-05	0.000399594	yes
XLOC_023360	XLOC_023360	Zwilch	chr9:63964953-64020738	KO	WT	OK	13.653	30.3177	1.15094	4.51649	5e-05	0.000399594	yes
XLOC_023369	XLOC_023369	Plekho2	chr9:65400383-65427894	KO	WT	OK	44.0895	21.2268	-1.05455	-4.45843	5e-05	0.000399594	yes
XLOC_023378	XLOC_023378	Lactb	chr9:66803199-66823291	KO	WT	OK	8.38676	3.893	-1.10723	-3.31253	5e-05	0.000399594	yes
XLOC_023393	XLOC_023393	Ccnb2	chr9:70255495-70269361	KO	WT	OK	14.7567	52.7834	1.83872	6.85718	5e-05	0.000399594	yes
XLOC_023406	XLOC_023406	Ccpg1os	chr9:72827532-72833183	KO	WT	OK	7.84235	2.6424	-1.56944	-2.88146	0.0008	0.00440859	yes
XLOC_023434	XLOC_023434	Htr1b	chr9:81521900-81538763	KO	WT	OK	0.121012	1.01928	3.07434	4.10011	5e-05	0.000399594	yes
XLOC_023466	XLOC_023466	Dipk2a	chr9:94418282-94438500	KO	WT	OK	34.995	77.4343	1.14582	4.79309	5e-05	0.000399594	yes
XLOC_023495	XLOC_023495	Il20rb	chr9:100358137-100386892	KO	WT	OK	6.74085	1.38142	-2.28678	-5.86317	5e-05	0.000399594	yes
XLOC_023504	XLOC_023504	Trf	chr9:103111205-103132616	KO	WT	OK	3.54349	1.61603	-1.13272	-2.72936	0.0005	0.00298533	yes
XLOC_023535	XLOC_023535	Mapkapk3	chr9:107157257-107192208	KO	WT	OK	17.5455	8.58624	-1.031	-3.84095	5e-05	0.000399594	yes
XLOC_023541	XLOC_023541	Slc38a3	chr9:107553485-107571299	KO	WT	OK	4.31907	1.26715	-1.76914	-4.25566	5e-05	0.000399594	yes
XLOC_023546	XLOC_023546	Inka1	chr9:107886554-107888247	KO	WT	OK	1.97968	0.895029	-1.14526	-1.64073	0.02595	0.0749117	no
XLOC_023551	XLOC_023551	Tcta	chr9:108205285-108208490	KO	WT	OK	11.1293	4.94852	-1.1693	-3.58874	5e-05	0.000399594	yes
XLOC_023556	XLOC_023556	P4htm	chr9:108481192-108499943	KO	WT	OK	1.54731	0.687935	-1.16942	-1.69711	0.0148	0.0480207	yes
XLOC_023640	XLOC_023640	Tmem158	chr9:123168174-123169907	KO	WT	OK	3.33496	9.28989	1.47799	3.86954	5e-05	0.000399594	yes
XLOC_023660	XLOC_023660	Ulbp1	chrUn_random:3058602-3072666	KO	WT	OK	8.93662	4.27362	-1.06427	-3.00008	0.00025	0.00166535	yes
XLOC_023771	XLOC_023771	Agtr2	chrX:21061749-21065959	KO	WT	OK	0.42512	1.1977	1.49432	2.4635	0.0032	0.0141365	yes
XLOC_023831	XLOC_023831	Gria3	chrX:38754030-39031778	KO	WT	OK	21.1822	4.55753	-2.21653	-8.42779	5e-05	0.000399594	yes
XLOC_023857	XLOC_023857	Rtl8c	chrX:50911098-50912311	KO	WT	OK	3.34823	1.39146	-1.2668	-2.03159	0.00615	0.0239428	yes
XLOC_023903	XLOC_023903	1110012L19Rik	chrX:67639087-67642591	KO	WT	OK	20.9642	9.17718	-1.19181	-3.73211	5e-05	0.000399594	yes
XLOC_023908	XLOC_023908	Hmgb3	chrX:68809091-68813848	KO	WT	OK	36.4935	92.1811	1.33683	5.42348	5e-05	0.000399594	yes
XLOC_023925	XLOC_023925	F8a	chrX:70473644-70476134	KO	WT	OK	12.7657	5.00508	-1.35081	-4.38099	5e-05	0.000399594	yes
XLOC_023928	XLOC_023928	Bgn	chrX:70728939-70741275	KO	WT	OK	190.007	88.4163	-1.10367	-4.70961	5e-05	0.000399594	yes
XLOC_023930	XLOC_023930	Dusp9	chrX:70884779-70888853	KO	WT	OK	5.16815	14.6339	1.5016	5.29137	5e-05	0.000399594	yes
XLOC_023948	XLOC_023948	Ikbkg	chrX:71638629-71699117	KO	WT	OK	25.0997	11.8053	-1.08824	-2.52806	0.0014	0.00709253	yes
XLOC_024010	XLOC_024010	Kif4	chrX:97821403-97922610	KO	WT	OK	11.7988	24.3429	1.04486	4.2747	5e-05	0.000399594	yes
XLOC_024050	XLOC_024050	Lpar4	chrX:104115963-104129238	KO	WT	OK	1.55566	3.44648	1.1476	3.15535	0.0002	0.00138545	yes
XLOC_024057	XLOC_024057	2810403D21Rik	chrX:106029816-106082235	KO	WT	OK	1.50338	0.59882	-1.32802	-1.46783	0.04965	0.124009	no
XLOC_024092	XLOC_024092	Drp2	chrX:130939318-130991112	KO	WT	OK	88.4406	39.0023	-1.18115	-5.03438	5e-05	0.000399594	yes
XLOC_024095	XLOC_024095	Armcx4	chrX:131221057-131232311	KO	WT	OK	0.965361	5.25605	2.44484	8.08579	5e-05	0.000399594	yes
XLOC_024129	XLOC_024129	Rnf128	chrX:136097878-136207684	KO	WT	OK	0.600507	3.96402	2.72271	5.13829	5e-05	0.000399594	yes
XLOC_024215	XLOC_024215	Rai2	chrX:158154967-158217426	KO	WT	OK	5.03121	2.05481	-1.2919	-3.44355	5e-05	0.000399594	yes
XLOC_024221	XLOC_024221	Pir	chrX:160707362-160810945	KO	WT	OK	2.27937	5.02243	1.13975	2.6921	0.0003	0.00192981	yes
XLOC_024231	XLOC_024231	Arhgap6	chrX:165233030-165742372	KO	WT	OK	1.93028	0.504378	-1.93623	-4.17419	5e-05	0.000399594	yes
XLOC_024312	XLOC_024312	Klhl13	chrX:22796396-22942208	KO	WT	OK	4.23736	8.55303	1.01327	3.40785	5e-05	0.000399594	yes
XLOC_024379	XLOC_024379	Apln	chrX:45378322-45388030	KO	WT	OK	1.20786	6.36755	2.39828	6.33614	5e-05	0.000399594	yes
XLOC_024396	XLOC_024396	Mbnl3	chrX:48466670-48559167	KO	WT	OK	1.79821	4.78189	1.41102	4.91381	5e-05	0.000399594	yes
XLOC_024428	XLOC_024428	Arhgef6	chrX:54484661-54591906	KO	WT	OK	10.0652	4.37337	-1.20255	-4.47267	5e-05	0.000399594	yes
XLOC_024496	XLOC_024496	Pdzd4	chrX:71038695-71070308	KO	WT	OK	1.51654	3.47186	1.19492	3.45346	5e-05	0.000399594	yes
XLOC_024500	XLOC_024500	Renbp	chrX:71167459-71176189	KO	WT	OK	2.16186	0.951311	-1.18428	-1.94746	0.0082	0.0301629	yes
XLOC_024551	XLOC_024551	Maged1	chrX:91780812-91787364	KO	WT	OK	49.4538	116.676	1.23836	5.32679	5e-05	0.000399594	yes
XLOC_024556	XLOC_024556	Amer1	chrX:92615652-92640179	KO	WT	OK	1.24869	2.74008	1.13381	3.74492	5e-05	0.000399594	yes
XLOC_024571	XLOC_024571	Slc7a3	chrX:98274548-98280744	KO	WT	OK	1.16339	3.99066	1.77829	3.84242	5e-05	0.000399594	yes
XLOC_024579	XLOC_024579	Ercc6l	chrX:99338158-99352430	KO	WT	OK	8.5753	18.1939	1.08519	4.26876	5e-05	0.000399594	yes
XLOC_024581	XLOC_024581	Cited1	chrX:99442716-99447520	KO	WT	OK	0.329537	1.37254	2.05834	1.61049	0.01865	0.057449	no
XLOC_024618	XLOC_024618	Hmgn5	chrX:106199875-106208719	KO	WT	OK	7.77015	18.666	1.2644	4.53459	5e-05	0.000399594	yes
XLOC_024619	XLOC_024619	Rps6ka6	chrX:108501445-108651568	KO	WT	OK	2.00296	5.74885	1.52114	4.74122	5e-05	0.000399594	yes
XLOC_024657	XLOC_024657	Bex2	chrX:132601103-132602775	KO	WT	OK	0.350228	2.23188	2.67189	2.56213	0.011	0.0380998	yes
XLOC_024660	XLOC_024660	Tceal5	chrX:132735486-132738423	KO	WT	OK	1.31441	0.641621	-1.03462	-1.28367	0.04695	0.118952	no
XLOC_024661	XLOC_024661	Bex1	chrX:132748510-132750052	KO	WT	OK	1.29353	5.54351	2.09948	3.40981	5e-05	0.000399594	yes
XLOC_024676	XLOC_024676	Tsc22d3	chrX:137074067-137135061	KO	WT	OK	40.5536	18.6069	-1.12399	-4.31233	5e-05	0.000399594	yes
XLOC_024691	XLOC_024691	Amot	chrX:141880966-141922182	KO	WT	OK	2.31273	4.66531	1.01238	3.55648	5e-05	0.000399594	yes
XLOC_024697	XLOC_024697	Apex2	chrX:147006049-147078421	KO	WT	OK	6.50133	13.2819	1.03065	3.25876	5e-05	0.000399594	yes
XLOC_024708	XLOC_024708	Shroom2	chrX:149044051-149204029	KO	WT	OK	2.0426	7.14627	1.80678	5.67544	5e-05	0.000399594	yes
XLOC_024749	XLOC_024749	Car5b	chrX:160414753-160465942	KO	WT	OK	9.86931	4.00681	-1.3005	-4.45572	5e-05	0.000399594	yes

## Sheet: ASC48_down_GO
Supplementary Table S1. Transcriptomic changes upon YTHDC1 iKO in ASC.
GO analysis of down-regulated genes in ASC 48h upon YTHDC1 iKO.
	ONTOLOGY	ID	Description	GeneRatio	BgRatio	pvalue	p.adjust	qvalue	geneID	Count
GO:0000280	BP	GO:0000280	nuclear division	66/514	442/29008	4.5e-41	1.79e-37	1.4e-37	Kif14/Aspm/Nek2/Obsl1/Nuf2/Fbxo5/Aurkb/Spag5/Birc5/Fignl1/Spdl1/Haspin/Top2a/Gen1/Trip13/Ccnb1/Reep4/Cdca2/Pdxp/Espl1/Racgap1/Eme2/Chtf18/Hsf2bp/Ndc80/Kif20b/Kif11/Incenp/Bub1b/Knstrn/Nusap1/Tpx2/Mybl2/Ube2c/Mastl/Ncaph/Bub1/Aurka/Tdrkh/Cenpe/Mnd1/Ccne2/Rad54l/Kif2c/Cdc20/Cdca8/Cenps/Tacc3/Ncapg/Msx1/Mad2l1/Ncapd2/Prc1/Plk1/Ube2s/Ccne1/Kif22/Mki67/Igf2/Spire2/Ing2/Fanca/Ttk/Kif23/Zwilch/Ccnb2	66
GO:0048285	BP	GO:0048285	organelle fission	66/514	495/29008	6.17e-38	1.23e-34	9.6e-35	Kif14/Aspm/Nek2/Obsl1/Nuf2/Fbxo5/Aurkb/Spag5/Birc5/Fignl1/Spdl1/Haspin/Top2a/Gen1/Trip13/Ccnb1/Reep4/Cdca2/Pdxp/Espl1/Racgap1/Eme2/Chtf18/Hsf2bp/Ndc80/Kif20b/Kif11/Incenp/Bub1b/Knstrn/Nusap1/Tpx2/Mybl2/Ube2c/Mastl/Ncaph/Bub1/Aurka/Tdrkh/Cenpe/Mnd1/Ccne2/Rad54l/Kif2c/Cdc20/Cdca8/Cenps/Tacc3/Ncapg/Msx1/Mad2l1/Ncapd2/Prc1/Plk1/Ube2s/Ccne1/Kif22/Mki67/Igf2/Spire2/Ing2/Fanca/Ttk/Kif23/Zwilch/Ccnb2	66
GO:0007059	BP	GO:0007059	chromosome segregation	55/514	338/29008	2.6e-36	3.46e-33	2.7e-33	Kif14/Nek2/Nuf2/Cenpf/Fbxo5/Aurkb/Spag5/Ska2/Birc5/Spdl1/Haspin/Top2a/Gen1/Trip13/Ccnb1/Dlgap5/Ska3/Esco2/Cdca2/Espl1/Recql4/Racgap1/Ddx11/Eme2/Chtf18/Ndc80/Ska1/Incenp/Bub1b/Knstrn/Nusap1/Fam83d/Ube2c/Ncaph/Bub1/Cenpe/Ect2/Ccne2/Kif2c/Cdc20/Cdca8/Cenps/Tacc3/Ncapg/Mad2l1/Ncapd2/Prc1/Plk1/Ccne1/Kif22/Mki67/Ttk/Spc24/Kif23/Zwilch	55
GO:0140014	BP	GO:0140014	mitotic nuclear division	48/514	278/29008	5.18e-33	5.16e-30	4.03e-30	Kif14/Nek2/Obsl1/Nuf2/Fbxo5/Aurkb/Spag5/Birc5/Spdl1/Haspin/Gen1/Trip13/Ccnb1/Reep4/Cdca2/Pdxp/Espl1/Racgap1/Ndc80/Kif20b/Kif11/Incenp/Bub1b/Knstrn/Nusap1/Tpx2/Mybl2/Ube2c/Ncaph/Bub1/Aurka/Cenpe/Kif2c/Cdc20/Cdca8/Tacc3/Ncapg/Mad2l1/Ncapd2/Prc1/Plk1/Ube2s/Kif22/Mki67/Igf2/Ttk/Kif23/Zwilch	48
GO:0098813	BP	GO:0098813	nuclear chromosome segregation	47/514	273/29008	2.78e-32	2.22e-29	1.73e-29	Kif14/Nek2/Nuf2/Cenpf/Fbxo5/Aurkb/Spag5/Birc5/Spdl1/Haspin/Top2a/Gen1/Trip13/Ccnb1/Esco2/Espl1/Recql4/Racgap1/Ddx11/Eme2/Ndc80/Incenp/Bub1b/Knstrn/Nusap1/Fam83d/Ube2c/Ncaph/Bub1/Cenpe/Ect2/Ccne2/Kif2c/Cdc20/Cdca8/Cenps/Tacc3/Ncapg/Mad2l1/Ncapd2/Prc1/Plk1/Ccne1/Kif22/Ttk/Kif23/Zwilch	47
GO:0000819	BP	GO:0000819	sister chromatid segregation	40/514	188/29008	2.23e-31	1.48e-28	1.16e-28	Kif14/Nek2/Nuf2/Fbxo5/Aurkb/Spag5/Birc5/Spdl1/Haspin/Top2a/Gen1/Trip13/Ccnb1/Esco2/Espl1/Recql4/Racgap1/Ddx11/Ndc80/Incenp/Bub1b/Knstrn/Nusap1/Ube2c/Ncaph/Bub1/Cenpe/Kif2c/Cdc20/Cdca8/Tacc3/Ncapg/Mad2l1/Ncapd2/Prc1/Plk1/Kif22/Ttk/Kif23/Zwilch	40
GO:0000070	BP	GO:0000070	mitotic sister chromatid segregation	36/514	159/29008	2.28e-29	1.3e-26	1.01e-26	Kif14/Nek2/Nuf2/Fbxo5/Aurkb/Spag5/Birc5/Spdl1/Haspin/Gen1/Trip13/Ccnb1/Espl1/Racgap1/Ndc80/Incenp/Bub1b/Knstrn/Nusap1/Ube2c/Ncaph/Bub1/Cenpe/Kif2c/Cdc20/Cdca8/Tacc3/Ncapg/Mad2l1/Ncapd2/Prc1/Plk1/Kif22/Ttk/Kif23/Zwilch	36
GO:0051321	BP	GO:0051321	meiotic cell cycle	41/514	333/29008	1.67e-22	8.31e-20	6.48e-20	Aspm/Nek2/Nuf2/Fbxo5/Fignl1/Top2a/Trip13/Espl1/Pkmyt1/Eme2/Chtf18/Hsf2bp/Ndc80/Cdc25c/Incenp/Bub1b/Mastl/Ncaph/Bub1/Aurka/Tdrkh/Cenpe/Mnd1/Ccne2/Rad54l/Cdc20/Cenps/Lfng/Pms2/Msx1/Ncapd2/Plk1/Ccne1/Mki67/Spire2/Ing2/Fanca/H2ax/Mns1/Ttk/Ccnb2	41
GO:1903046	BP	GO:1903046	meiotic cell cycle process	34/514	220/29008	4.59e-22	2.03e-19	1.59e-19	Aspm/Nuf2/Fbxo5/Fignl1/Top2a/Trip13/Espl1/Eme2/Chtf18/Hsf2bp/Ndc80/Cdc25c/Incenp/Bub1b/Mastl/Ncaph/Bub1/Aurka/Tdrkh/Cenpe/Mnd1/Ccne2/Rad54l/Cdc20/Cenps/Msx1/Ncapd2/Plk1/Ccne1/Spire2/Ing2/Fanca/Ttk/Ccnb2	34
GO:0140013	BP	GO:0140013	meiotic nuclear division	32/514	200/29008	2.6e-21	1.04e-18	8.1e-19	Aspm/Nuf2/Fbxo5/Fignl1/Top2a/Trip13/Espl1/Eme2/Chtf18/Hsf2bp/Ndc80/Incenp/Bub1b/Mastl/Ncaph/Bub1/Aurka/Tdrkh/Cenpe/Mnd1/Ccne2/Rad54l/Cdc20/Cenps/Msx1/Plk1/Ccne1/Spire2/Ing2/Fanca/Ttk/Ccnb2	32
GO:0007051	BP	GO:0007051	spindle organization	30/514	183/29008	2.28e-20	8.27e-18	6.45e-18	Aspm/Nek2/Nuf2/Fbxo5/Aurkb/Spag5/Chd3/Ccnb1/Dlgap5/Espl1/Racgap1/Ndc80/Trim36/Kif11/Incenp/Knstrn/Tpx2/Mybl2/Aurka/Cenpe/Gpsm2/Aunip/Cdc20/Tacc3/Gnai1/Prc1/Plk1/Kif23/Ccnb2/Kif4	30
GO:0051304	BP	GO:0051304	chromosome separation	22/514	96/29008	1.48e-18	4.93e-16	3.85e-16	Fbxo5/Aurkb/Birc5/Spdl1/Top2a/Gen1/Trip13/Ccnb1/Espl1/Eme2/Ndc80/Bub1b/Ube2c/Ncaph/Bub1/Cenpe/Cenps/Tacc3/Mad2l1/Plk1/Ttk/Zwilch	22
GO:0051983	BP	GO:0051983	regulation of chromosome segregation	21/514	86/29008	2.18e-18	6.68e-16	5.21e-16	Fbxo5/Aurkb/Birc5/Spdl1/Gen1/Trip13/Ccnb1/Cdca2/Chtf18/Ndc80/Bub1b/Ube2c/Bub1/Cenpe/Kif2c/Tacc3/Mad2l1/Plk1/Mki67/Ttk/Zwilch	21
GO:1902850	BP	GO:1902850	microtubule cytoskeleton organization involved in mitosis	25/514	146/29008	1.17e-17	3.34e-15	2.61e-15	Nek2/Nuf2/Aurkb/Spdl1/Ccnb1/Dlgap5/Racgap1/Ndc80/Kif11/Sapcd2/Nusap1/Tpx2/Mybl2/Aurka/Cenpe/Gpsm2/Cdc20/Cenpa/Tacc3/Gnai1/Mad2l1/Prc1/Plk1/Kif23/Kif4	25
GO:0007088	BP	GO:0007088	regulation of mitotic nuclear division	22/514	110/29008	3.37e-17	8.95e-15	6.99e-15	Obsl1/Fbxo5/Aurkb/Birc5/Spdl1/Gen1/Trip13/Ccnb1/Cdca2/Pdxp/Ndc80/Kif20b/Bub1b/Nusap1/Bub1/Cenpe/Mad2l1/Plk1/Mki67/Igf2/Ttk/Zwilch	22
GO:0051985	BP	GO:0051985	negative regulation of chromosome segregation	16/514	46/29008	4.56e-17	1.13e-14	8.86e-15	Fbxo5/Aurkb/Birc5/Spdl1/Gen1/Trip13/Ccnb1/Chtf18/Ndc80/Bub1b/Bub1/Cenpe/Mad2l1/Plk1/Ttk/Zwilch	16
GO:0051783	BP	GO:0051783	regulation of nuclear division	24/514	143/29008	8.53e-17	2e-14	1.56e-14	Obsl1/Fbxo5/Aurkb/Birc5/Spdl1/Gen1/Trip13/Ccnb1/Cdca2/Pdxp/Ndc80/Kif20b/Bub1b/Nusap1/Bub1/Cenpe/Cdc20/Msx1/Mad2l1/Plk1/Mki67/Igf2/Ttk/Zwilch	24
GO:0044770	BP	GO:0044770	cell cycle phase transition	41/514	492/29008	2.66e-16	5.81e-14	4.53e-14	Kif14/Cdk18/Cenpf/Fbxo5/Cdk1/Aurkb/Birc5/Spdl1/Haspin/Gen1/Gas1/Trip13/Ccnb1/Skp2/Eme2/Ndc80/Lmnb1/Cdc25c/Bub1b/Fam83d/Ube2c/Mastl/Bub1/Aurka/Pkia/Nes/Cenpe/Ccna2/Cks1b/Ccne2/Cdkn2a/Nasp/Tacc3/Dbf4/Mad2l1/Plk1/Ube2s/Ccne1/Ttk/Zwilch/Ccnb2	41
GO:0045841	BP	GO:0045841	negative regulation of mitotic metaphase/anaphase transition	15/514	42/29008	2.77e-16	5.81e-14	4.53e-14	Fbxo5/Aurkb/Birc5/Spdl1/Gen1/Trip13/Ccnb1/Ndc80/Bub1b/Bub1/Cenpe/Mad2l1/Plk1/Ttk/Zwilch	15
GO:0007091	BP	GO:0007091	metaphase/anaphase transition of mitotic cell cycle	17/514	61/29008	3.37e-16	6.71e-14	5.24e-14	Fbxo5/Aurkb/Birc5/Spdl1/Gen1/Trip13/Ccnb1/Ndc80/Bub1b/Ube2c/Bub1/Cenpe/Tacc3/Mad2l1/Plk1/Ttk/Zwilch	17
GO:0033046	BP	GO:0033046	negative regulation of sister chromatid segregation	15/514	43/29008	4.18e-16	7.25e-14	5.66e-14	Fbxo5/Aurkb/Birc5/Spdl1/Gen1/Trip13/Ccnb1/Ndc80/Bub1b/Bub1/Cenpe/Mad2l1/Plk1/Ttk/Zwilch	15
GO:0033048	BP	GO:0033048	negative regulation of mitotic sister chromatid segregation	15/514	43/29008	4.18e-16	7.25e-14	5.66e-14	Fbxo5/Aurkb/Birc5/Spdl1/Gen1/Trip13/Ccnb1/Ndc80/Bub1b/Bub1/Cenpe/Mad2l1/Plk1/Ttk/Zwilch	15
GO:2000816	BP	GO:2000816	negative regulation of mitotic sister chromatid separation	15/514	43/29008	4.18e-16	7.25e-14	5.66e-14	Fbxo5/Aurkb/Birc5/Spdl1/Gen1/Trip13/Ccnb1/Ndc80/Bub1b/Bub1/Cenpe/Mad2l1/Plk1/Ttk/Zwilch	15
GO:0010965	BP	GO:0010965	regulation of mitotic sister chromatid separation	17/514	62/29008	4.57e-16	7.42e-14	5.79e-14	Fbxo5/Aurkb/Birc5/Spdl1/Gen1/Trip13/Ccnb1/Ndc80/Bub1b/Ube2c/Bub1/Cenpe/Tacc3/Mad2l1/Plk1/Ttk/Zwilch	17
GO:0044772	BP	GO:0044772	mitotic cell cycle phase transition	37/514	406/29008	4.65e-16	7.42e-14	5.79e-14	Kif14/Cdk18/Cenpf/Fbxo5/Cdk1/Aurkb/Birc5/Spdl1/Haspin/Gen1/Trip13/Ccnb1/Skp2/Ndc80/Lmnb1/Cdc25c/Bub1b/Ube2c/Mastl/Bub1/Pkia/Nes/Cenpe/Ccna2/Cks1b/Ccne2/Cdkn2a/Nasp/Tacc3/Dbf4/Mad2l1/Plk1/Ube2s/Ccne1/Ttk/Zwilch/Ccnb2	37
GO:1902100	BP	GO:1902100	negative regulation of metaphase/anaphase transition of cell cycle	15/514	44/29008	6.24e-16	9.57e-14	7.47e-14	Fbxo5/Aurkb/Birc5/Spdl1/Gen1/Trip13/Ccnb1/Ndc80/Bub1b/Bub1/Cenpe/Mad2l1/Plk1/Ttk/Zwilch	15
GO:0044784	BP	GO:0044784	metaphase/anaphase transition of cell cycle	17/514	64/29008	8.24e-16	1.22e-13	9.5e-14	Fbxo5/Aurkb/Birc5/Spdl1/Gen1/Trip13/Ccnb1/Ndc80/Bub1b/Ube2c/Bub1/Cenpe/Tacc3/Mad2l1/Plk1/Ttk/Zwilch	17
GO:0031577	BP	GO:0031577	spindle checkpoint signaling	15/514	45/29008	9.22e-16	1.27e-13	9.88e-14	Aurkb/Birc5/Spdl1/Gen1/Trip13/Ccnb1/Ndc80/Bub1b/Bub1/Aurka/Cenpe/Mad2l1/Plk1/Ttk/Zwilch	15
GO:1905819	BP	GO:1905819	negative regulation of chromosome separation	15/514	45/29008	9.22e-16	1.27e-13	9.88e-14	Fbxo5/Aurkb/Birc5/Spdl1/Gen1/Trip13/Ccnb1/Ndc80/Bub1b/Bub1/Cenpe/Mad2l1/Plk1/Ttk/Zwilch	15
GO:0051306	BP	GO:0051306	mitotic sister chromatid separation	17/514	65/29008	1.1e-15	1.46e-13	1.14e-13	Fbxo5/Aurkb/Birc5/Spdl1/Gen1/Trip13/Ccnb1/Ndc80/Bub1b/Ube2c/Bub1/Cenpe/Tacc3/Mad2l1/Plk1/Ttk/Zwilch	17
GO:0033047	BP	GO:0033047	regulation of mitotic sister chromatid segregation	15/514	46/29008	1.35e-15	1.73e-13	1.35e-13	Fbxo5/Aurkb/Birc5/Spdl1/Gen1/Trip13/Ccnb1/Ndc80/Bub1b/Bub1/Cenpe/Mad2l1/Plk1/Ttk/Zwilch	15
GO:1905818	BP	GO:1905818	regulation of chromosome separation	17/514	68/29008	2.52e-15	3.13e-13	2.45e-13	Fbxo5/Aurkb/Birc5/Spdl1/Gen1/Trip13/Ccnb1/Ndc80/Bub1b/Ube2c/Bub1/Cenpe/Tacc3/Mad2l1/Plk1/Ttk/Zwilch	17
GO:0030071	BP	GO:0030071	regulation of mitotic metaphase/anaphase transition	16/514	58/29008	3.02e-15	3.65e-13	2.85e-13	Fbxo5/Aurkb/Birc5/Spdl1/Gen1/Trip13/Ccnb1/Ndc80/Bub1b/Ube2c/Bub1/Cenpe/Mad2l1/Plk1/Ttk/Zwilch	16
GO:0033045	BP	GO:0033045	regulation of sister chromatid segregation	17/514	69/29008	3.29e-15	3.85e-13	3.01e-13	Fbxo5/Aurkb/Birc5/Spdl1/Gen1/Trip13/Ccnb1/Ndc80/Bub1b/Ube2c/Bub1/Cenpe/Tacc3/Mad2l1/Plk1/Ttk/Zwilch	17
GO:0007094	BP	GO:0007094	mitotic spindle assembly checkpoint signaling	14/514	40/29008	3.84e-15	4.25e-13	3.32e-13	Aurkb/Birc5/Spdl1/Gen1/Trip13/Ccnb1/Ndc80/Bub1b/Bub1/Cenpe/Mad2l1/Plk1/Ttk/Zwilch	14
GO:0071173	BP	GO:0071173	spindle assembly checkpoint signaling	14/514	40/29008	3.84e-15	4.25e-13	3.32e-13	Aurkb/Birc5/Spdl1/Gen1/Trip13/Ccnb1/Ndc80/Bub1b/Bub1/Cenpe/Mad2l1/Plk1/Ttk/Zwilch	14
GO:0007346	BP	GO:0007346	regulation of mitotic cell cycle	38/514	462/29008	5.19e-15	5.59e-13	4.36e-13	Kif14/Obsl1/Cenpf/Fbxo5/Cdk1/Aurkb/Birc5/Spdl1/Haspin/Gen1/Gas1/Trip13/Ccnb1/Dlgap5/Fzd3/Cdca2/Pdxp/Eme2/Ndc80/Lmnb1/Cdc25c/Kif20b/Bub1b/Nusap1/Ube2c/Bub1/Pkia/Cenpe/Cks1b/Cdkn2a/Dbf4/Mad2l1/Asns/Plk1/Mki67/Igf2/Ttk/Zwilch	38
GO:1902099	BP	GO:1902099	regulation of metaphase/anaphase transition of cell cycle	16/514	61/29008	7.3e-15	7.66e-13	5.97e-13	Fbxo5/Aurkb/Birc5/Spdl1/Gen1/Trip13/Ccnb1/Ndc80/Bub1b/Ube2c/Bub1/Cenpe/Mad2l1/Plk1/Ttk/Zwilch	16
GO:0071174	BP	GO:0071174	mitotic spindle checkpoint signaling	14/514	42/29008	8.47e-15	8.66e-13	6.76e-13	Aurkb/Birc5/Spdl1/Gen1/Trip13/Ccnb1/Ndc80/Bub1b/Bub1/Cenpe/Mad2l1/Plk1/Ttk/Zwilch	14
GO:0090068	BP	GO:0090068	positive regulation of cell cycle process	28/514	249/29008	9.83e-15	9.79e-13	7.64e-13	Kif14/Fbxo5/Cdk1/Aurkb/Spag5/Birc5/Cenpv/Gen1/Ccnb1/Racgap1/Ndc80/Lmnb1/Cdc25c/Kif20b/Nusap1/Fam83d/Ube2c/Aurka/Plk4/Cenpe/Ect2/Gpsm2/Dbf4/Msx1/Mad2l1/E2f8/Igf2/Kif23	28
GO:0045839	BP	GO:0045839	negative regulation of mitotic nuclear division	15/514	52/29008	1.07e-14	1.04e-12	8.11e-13	Fbxo5/Aurkb/Birc5/Spdl1/Gen1/Trip13/Ccnb1/Ndc80/Bub1b/Bub1/Cenpe/Mad2l1/Plk1/Ttk/Zwilch	15
GO:2001251	BP	GO:2001251	negative regulation of chromosome organization	18/514	86/29008	1.11e-14	1.05e-12	8.21e-13	Fbxo5/Aurkb/Birc5/Spdl1/Top2a/Gen1/Trip13/Ccnb1/Recql4/Ndc80/Bub1b/Bub1/Cenpe/Mad2l1/Plk1/Pif1/Ttk/Zwilch	18
GO:0007052	BP	GO:0007052	mitotic spindle organization	20/514	119/29008	3.13e-14	2.9e-12	2.27e-12	Nek2/Nuf2/Aurkb/Ccnb1/Dlgap5/Racgap1/Ndc80/Kif11/Tpx2/Mybl2/Aurka/Cenpe/Gpsm2/Cdc20/Tacc3/Gnai1/Prc1/Plk1/Kif23/Kif4	20
GO:0045787	BP	GO:0045787	positive regulation of cell cycle	31/514	336/29008	8.47e-14	7.67e-12	5.99e-12	Kif14/Fbxo5/Cdk1/Aurkb/Spag5/Birc5/Cenpv/Gen1/Ccnb1/Racgap1/Ndc80/Lmnb1/Cdc25c/Kif20b/Nusap1/Fam83d/Ube2c/Aurka/Plk4/Cenpe/Ect2/Gpsm2/Lfng/Dbf4/Msx1/Mad2l1/Asns/E2f8/Nupr1/Igf2/Kif23	31
GO:0007143	BP	GO:0007143	female meiotic nuclear division	13/514	41/29008	1.64e-13	1.45e-11	1.13e-11	Fbxo5/Top2a/Trip13/Hsf2bp/Ndc80/Mastl/Ncaph/Aurka/Cenpe/Plk1/Spire2/Ttk/Ccnb2	13
GO:0051784	BP	GO:0051784	negative regulation of nuclear division	15/514	62/29008	1.89e-13	1.62e-11	1.26e-11	Fbxo5/Aurkb/Birc5/Spdl1/Gen1/Trip13/Ccnb1/Ndc80/Bub1b/Bub1/Cenpe/Mad2l1/Plk1/Ttk/Zwilch	15
GO:0051225	BP	GO:0051225	spindle assembly	19/514	115/29008	1.91e-13	1.62e-11	1.26e-11	Aspm/Nek2/Fbxo5/Aurkb/Spag5/Racgap1/Ndc80/Kif11/Incenp/Tpx2/Mybl2/Aurka/Cenpe/Gpsm2/Cdc20/Prc1/Plk1/Kif23/Ccnb2	19
GO:0000910	BP	GO:0000910	cytokinesis	23/514	182/29008	2.04e-13	1.69e-11	1.32e-11	Kif14/Aurkb/Birc5/Cenpv/Pdxp/Racgap1/Kif20a/Trim36/Kif20b/Cep55/Incenp/Nusap1/Aurka/Plk4/Ect2/Cenpa/Prc1/Plk1/E2f8/Spire2/Anln/Kif23/Klhl13	23
GO:0033044	BP	GO:0033044	regulation of chromosome organization	22/514	185/29008	2.37e-12	1.93e-10	1.51e-10	Nek2/Fbxo5/Aurkb/Birc5/Spdl1/Cenpv/Top2a/Gen1/Trip13/Ccnb1/Recql4/Ndc80/Bub1b/Ube2c/Bub1/Cenpe/Tacc3/Mad2l1/Plk1/Pif1/Ttk/Zwilch	22
GO:0061982	BP	GO:0061982	meiosis I cell cycle process	19/514	135/29008	3.69e-12	2.95e-10	2.3e-10	Fbxo5/Top2a/Trip13/Espl1/Eme2/Chtf18/Hsf2bp/Ndc80/Cdc25c/Aurka/Cenpe/Mnd1/Ccne2/Rad54l/Cenps/Plk1/Ccne1/Ing2/Ccnb2	19
GO:0051310	BP	GO:0051310	metaphase plate congression	14/514	64/29008	5.37e-12	4.2e-10	3.28e-10	Kif14/Nuf2/Cenpf/Aurkb/Spag5/Spdl1/Ccnb1/Ndc80/Incenp/Fam83d/Cenpe/Kif2c/Cdca8/Kif22	14
GO:0008608	BP	GO:0008608	attachment of spindle microtubules to kinetochore	11/514	33/29008	6.62e-12	5.07e-10	3.96e-10	Nek2/Nuf2/Aurkb/Spag5/Ccnb1/Racgap1/Ndc80/Knstrn/Cenpe/Ect2/Kif2c	11
GO:0003009	BP	GO:0003009	skeletal muscle contraction	12/514	43/29008	7.86e-12	5.91e-10	4.61e-10	Chrnd/Chrng/Tnni1/Myh3/Stac2/Tnnc1/Actn3/Tnnc2/Tnni2/Tnnt3/Tnnt1/Atp2a1	12
GO:0051303	BP	GO:0051303	establishment of chromosome localization	15/514	82/29008	1.46e-11	1.08e-09	8.41e-10	Kif14/Nuf2/Cenpf/Aurkb/Spag5/Birc5/Spdl1/Ccnb1/Ndc80/Incenp/Fam83d/Cenpe/Kif2c/Cdca8/Kif22	15
GO:0007127	BP	GO:0007127	meiosis I	18/514	130/29008	1.81e-11	1.31e-09	1.03e-09	Fbxo5/Top2a/Trip13/Espl1/Eme2/Chtf18/Hsf2bp/Ndc80/Aurka/Cenpe/Mnd1/Ccne2/Rad54l/Cenps/Plk1/Ccne1/Ing2/Ccnb2	18
GO:0051302	BP	GO:0051302	regulation of cell division	21/514	186/29008	2.04e-11	1.45e-09	1.13e-09	Kif14/Aspm/Aurkb/Cenpv/Pdxp/Racgap1/Lbh/Kif20a/Kif20b/Incenp/Mdk/Aurka/Plk4/Sfrp2/Ect2/Prc1/Plk1/E2f8/Igf2/Kif23/Klhl13	21
GO:0050000	BP	GO:0050000	chromosome localization	15/514	84/29008	2.1e-11	1.47e-09	1.15e-09	Kif14/Nuf2/Cenpf/Aurkb/Spag5/Birc5/Spdl1/Ccnb1/Ndc80/Incenp/Fam83d/Cenpe/Kif2c/Cdca8/Kif22	15
GO:0051988	BP	GO:0051988	regulation of attachment of spindle microtubules to kinetochore	8/514	14/29008	2.52e-11	1.73e-09	1.35e-09	Nek2/Aurkb/Spag5/Ccnb1/Racgap1/Knstrn/Cenpe/Ect2	8
GO:0032465	BP	GO:0032465	regulation of cytokinesis	16/514	101/29008	3e-11	2.03e-09	1.58e-09	Kif14/Aurkb/Cenpv/Pdxp/Racgap1/Kif20a/Kif20b/Incenp/Aurka/Plk4/Ect2/Prc1/Plk1/E2f8/Kif23/Klhl13	16
GO:0140694	BP	GO:0140694	non-membrane-bounded organelle assembly	29/514	373/29008	3.69e-11	2.45e-09	1.91e-09	Aspm/Nek2/Fbxo5/Aurkb/Spag5/Dlgap5/Racgap1/Ndc80/Kif11/Incenp/Klhl41/Tpx2/Mybl2/Nebl/Ttn/Actc1/Aurka/Plk4/Cenpe/Gpsm2/Cdc20/Cenps/Cenpa/Prc1/Plk1/Tnnt3/Tnnt1/Kif23/Ccnb2	29
GO:1901987	BP	GO:1901987	regulation of cell cycle phase transition	29/514	378/29008	5.08e-11	3.32e-09	2.59e-09	Kif14/Cenpf/Fbxo5/Cdk1/Aurkb/Birc5/Spdl1/Haspin/Gen1/Gas1/Trip13/Ccnb1/Eme2/Ndc80/Lmnb1/Cdc25c/Bub1b/Fam83d/Ube2c/Bub1/Aurka/Pkia/Cenpe/Cdkn2a/Dbf4/Mad2l1/Plk1/Ttk/Zwilch	29
GO:0061640	BP	GO:0061640	cytoskeleton-dependent cytokinesis	15/514	93/29008	9.57e-11	6.16e-09	4.8e-09	Aurkb/Birc5/Racgap1/Kif20a/Trim36/Kif20b/Cep55/Incenp/Nusap1/Ect2/Cenpa/Plk1/Spire2/Anln/Kif23	15
GO:1901990	BP	GO:1901990	regulation of mitotic cell cycle phase transition	25/514	293/29008	1.19e-10	7.54e-09	5.89e-09	Kif14/Cenpf/Fbxo5/Cdk1/Aurkb/Birc5/Spdl1/Haspin/Gen1/Trip13/Ccnb1/Ndc80/Lmnb1/Cdc25c/Bub1b/Ube2c/Bub1/Pkia/Cenpe/Cdkn2a/Dbf4/Mad2l1/Plk1/Ttk/Zwilch	25
GO:0000281	BP	GO:0000281	mitotic cytokinesis	13/514	67/29008	1.55e-10	9.65e-09	7.53e-09	Birc5/Racgap1/Kif20a/Trim36/Kif20b/Cep55/Incenp/Nusap1/Ect2/Cenpa/Plk1/Anln/Kif23	13
GO:0071459	BP	GO:0071459	protein localization to chromosome, centromeric region	9/514	25/29008	2.55e-10	1.56e-08	1.22e-08	Cdk1/Aurkb/Spdl1/Haspin/Ndc80/Bub1b/Cenpa/Ttk/Zwilch	9
GO:0007517	BP	GO:0007517	muscle organ development	27/514	360/29008	3.93e-10	2.37e-08	1.85e-08	Col3a1/Chrnd/Myog/Tnni1/Dner/Cenpf/Myf6/Etv1/Sox11/Rbm24/Tnnc1/Angpt1/Mymx/Actn3/Klhl41/Mymk/Ttn/Actc1/Lama5/Msx1/Smyd1/Mylpf/Trim72/Nupr1/Igf2/Foxc2/Klhl40	27
GO:0050879	BP	GO:0050879	multicellular organismal movement	12/514	60/29008	5.45e-10	3.2e-08	2.5e-08	Chrnd/Chrng/Tnni1/Myh3/Stac2/Tnnc1/Actn3/Tnnc2/Tnni2/Tnnt3/Tnnt1/Atp2a1	12
GO:0050881	BP	GO:0050881	musculoskeletal movement	12/514	60/29008	5.45e-10	3.2e-08	2.5e-08	Chrnd/Chrng/Tnni1/Myh3/Stac2/Tnnc1/Actn3/Tnnc2/Tnni2/Tnnt3/Tnnt1/Atp2a1	12
GO:0045786	BP	GO:0045786	negative regulation of cell cycle	27/514	367/29008	6.01e-10	3.47e-08	2.71e-08	Nek2/Fbxo5/Cdk1/Aurkb/Birc5/Spdl1/Haspin/Gen1/Gmnn/Gas1/Trip13/Ccnb1/Fzd3/Recql4/Eme2/Ndc80/Bub1b/Bub1/Aurka/Cenpe/Cdkn2a/Mad2l1/Plk1/E2f8/Nupr1/Ttk/Zwilch	27
GO:0007144	BP	GO:0007144	female meiosis I	7/514	13/29008	8.24e-10	4.69e-08	3.66e-08	Fbxo5/Trip13/Hsf2bp/Ndc80/Aurka/Cenpe/Ccnb2	7
GO:0044839	BP	GO:0044839	cell cycle G2/M phase transition	17/514	146/29008	1.04e-09	5.86e-08	4.57e-08	Kif14/Cenpf/Fbxo5/Cdk1/Birc5/Ccnb1/Skp2/Ndc80/Lmnb1/Cdc25c/Mastl/Pkia/Nes/Ccna2/Cdkn2a/Plk1/Ccnb2	17
GO:0007292	BP	GO:0007292	female gamete generation	18/514	166/29008	1.08e-09	5.97e-08	4.66e-08	Aspm/Fbxo5/Top2a/Trip13/Ccnb1/Hsf2bp/Ndc80/Mastl/Mdk/Ncaph/Aurka/Cenpe/Bmpr1b/Ythdc1/Plk1/Spire2/Ttk/Ccnb2	18
GO:0006260	BP	GO:0006260	DNA replication	22/514	253/29008	1.09e-09	5.97e-08	4.66e-08	Gli2/Fbxo5/Cdk1/Gen1/Gmnn/Esco2/Recql4/Chaf1a/Ddx11/Eme2/Chtf18/Mcm10/Ccna2/Ccne2/Nasp/Cenps/Dbf4/Ccne1/E2f8/Pif1/Pclaf/Traip	22
GO:0010948	BP	GO:0010948	negative regulation of cell cycle process	23/514	282/29008	1.59e-09	8.59e-08	6.7e-08	Nek2/Fbxo5/Cdk1/Aurkb/Birc5/Spdl1/Haspin/Gen1/Gas1/Trip13/Ccnb1/Recql4/Eme2/Ndc80/Bub1b/Bub1/Aurka/Cenpe/Mad2l1/Plk1/E2f8/Ttk/Zwilch	23
GO:0010639	BP	GO:0010639	negative regulation of organelle organization	26/514	364/29008	2.34e-09	1.24e-07	9.69e-08	Spta1/Fbxo5/Aurkb/Birc5/Spdl1/Top2a/Evl/Gen1/Trip13/Ccnb1/Recql4/Ndc80/Bub1b/Tpx2/Bub1/Cenpe/Trim54/Hip1r/Mad2l1/Plk1/Nupr1/Pif1/Ttk/Coro2b/Zwilch/Shroom2	26
GO:0007093	BP	GO:0007093	mitotic cell cycle checkpoint signaling	16/514	136/29008	2.78e-09	1.46e-07	1.14e-07	Cdk1/Aurkb/Birc5/Spdl1/Gen1/Trip13/Ccnb1/Eme2/Ndc80/Bub1b/Bub1/Cenpe/Mad2l1/Plk1/Ttk/Zwilch	16
GO:0051653	BP	GO:0051653	spindle localization	11/514	56/29008	3.53e-09	1.82e-07	1.42e-07	Aspm/Spag5/Spdl1/Ndc80/Sapcd2/Nusap1/Gpsm2/Cenpa/Mad2l1/Plk1/Spire2	11
GO:0051146	BP	GO:0051146	striated muscle cell differentiation	24/514	320/29008	3.74e-09	1.91e-07	1.49e-07	Myog/Igfbp5/Dner/Rgs4/Myf6/Rbm24/Mymx/Actn3/Klhl41/Nebl/Mymk/Ttn/Actc1/Msx1/Cxcl10/Smyd1/Mamstr/Alpk3/Trim72/Tnnt3/Tnnt1/Igf2/Klhl40/Agtr2	24
GO:0060537	BP	GO:0060537	muscle tissue development	30/514	486/29008	4.24e-09	2.14e-07	1.67e-07	Col3a1/Chrnd/Myog/Tnni1/Igfbp5/Dner/Rgs4/Cenpf/Cdk1/Myf6/Sox11/Rbm24/Ccnb1/Tnnc1/Angpt1/Mapk11/Actn3/Klhl41/Nebl/Ttn/Actc1/Smyd1/Alpk3/Mylpf/Nupr1/Igf2/Foxc2/Klhl40/Dipk2a/Agtr2	30
GO:0071103	BP	GO:0071103	DNA conformation change	19/514	203/29008	4.48e-09	2.23e-07	1.74e-07	Cdk1/Cenpv/Top2a/H2bc12/H3c1/Ccnb1/Recql4/Chaf1a/Ddx11/Incenp/Nusap1/Ncaph/Nasp/Mterf1b/Ncapg/H1f10/Ncapd2/Asf1b/Pif1	19
GO:0090306	BP	GO:0090306	meiotic spindle assembly	6/514	10/29008	5.94e-09	2.93e-07	2.28e-07	Aspm/Fbxo5/Ndc80/Aurka/Cenpe/Ccnb2	6
GO:0045930	BP	GO:0045930	negative regulation of mitotic cell cycle	20/514	231/29008	6.75e-09	3.28e-07	2.56e-07	Fbxo5/Cdk1/Aurkb/Birc5/Spdl1/Haspin/Gen1/Gas1/Trip13/Ccnb1/Fzd3/Eme2/Ndc80/Bub1b/Bub1/Cenpe/Mad2l1/Plk1/Ttk/Zwilch	20
GO:1901991	BP	GO:1901991	negative regulation of mitotic cell cycle phase transition	17/514	169/29008	9.89e-09	4.75e-07	3.7e-07	Fbxo5/Cdk1/Aurkb/Birc5/Spdl1/Haspin/Gen1/Trip13/Ccnb1/Ndc80/Bub1b/Bub1/Cenpe/Mad2l1/Plk1/Ttk/Zwilch	17
GO:0007080	BP	GO:0007080	mitotic metaphase plate congression	10/514	48/29008	1e-08	4.75e-07	3.7e-07	Kif14/Nuf2/Aurkb/Spdl1/Ccnb1/Ndc80/Cenpe/Kif2c/Cdca8/Kif22	10
GO:1901988	BP	GO:1901988	negative regulation of cell cycle phase transition	20/514	242/29008	1.49e-08	6.98e-07	5.45e-07	Fbxo5/Cdk1/Aurkb/Birc5/Spdl1/Haspin/Gen1/Gas1/Trip13/Ccnb1/Eme2/Ndc80/Bub1b/Bub1/Aurka/Cenpe/Mad2l1/Plk1/Ttk/Zwilch	20
GO:0000075	BP	GO:0000075	cell cycle checkpoint signaling	17/514	175/29008	1.67e-08	7.75e-07	6.05e-07	Cdk1/Aurkb/Birc5/Spdl1/Gen1/Trip13/Ccnb1/Eme2/Ndc80/Bub1b/Bub1/Aurka/Cenpe/Mad2l1/Plk1/Ttk/Zwilch	17
GO:0000086	BP	GO:0000086	G2/M transition of mitotic cell cycle	15/514	134/29008	1.72e-08	7.9e-07	6.17e-07	Kif14/Cenpf/Fbxo5/Cdk1/Birc5/Ccnb1/Skp2/Lmnb1/Cdc25c/Mastl/Pkia/Nes/Ccna2/Cdkn2a/Plk1	15
GO:0051293	BP	GO:0051293	establishment of spindle localization	10/514	51/29008	1.86e-08	8.44e-07	6.59e-07	Spag5/Spdl1/Ndc80/Sapcd2/Nusap1/Gpsm2/Cenpa/Mad2l1/Plk1/Spire2	10
GO:0014706	BP	GO:0014706	striated muscle tissue development	28/514	461/29008	1.98e-08	8.86e-07	6.92e-07	Chrnd/Myog/Tnni1/Dner/Rgs4/Cenpf/Cdk1/Myf6/Sox11/Rbm24/Ccnb1/Tnnc1/Angpt1/Mapk11/Actn3/Klhl41/Nebl/Ttn/Actc1/Smyd1/Alpk3/Mylpf/Nupr1/Igf2/Foxc2/Klhl40/Dipk2a/Agtr2	28
GO:0000212	BP	GO:0000212	meiotic spindle organization	7/514	19/29008	2.21e-08	9.56e-07	7.46e-07	Aspm/Fbxo5/Espl1/Ndc80/Aurka/Cenpe/Ccnb2	7
GO:0034501	BP	GO:0034501	protein localization to kinetochore	7/514	19/29008	2.21e-08	9.56e-07	7.46e-07	Cdk1/Aurkb/Spdl1/Haspin/Ndc80/Ttk/Zwilch	7
GO:1903083	BP	GO:1903083	protein localization to condensed chromosome	7/514	19/29008	2.21e-08	9.56e-07	7.46e-07	Cdk1/Aurkb/Spdl1/Haspin/Ndc80/Ttk/Zwilch	7
GO:0045132	BP	GO:0045132	meiotic chromosome segregation	13/514	102/29008	3.25e-08	1.39e-06	1.09e-06	Nuf2/Top2a/Trip13/Espl1/Eme2/Bub1b/Ncaph/Bub1/Ccne2/Cenps/Plk1/Ccne1/Ttk	13
GO:0051656	BP	GO:0051656	establishment of organelle localization	26/514	415/29008	3.44e-08	1.46e-06	1.14e-06	Kif14/Nuf2/Cenpf/Aurkb/Spag5/Birc5/Spdl1/Ccnb1/Ndc80/Incenp/Sapcd2/Nusap1/Fam83d/Cenpe/Mgarp/Gpsm2/Kif2c/Cdca8/Cenpa/Tacc3/Mad2l1/Plk1/Kif22/Spire2/Dipk2a/Shroom2	26
GO:0003012	BP	GO:0003012	muscle system process	26/514	425/29008	5.53e-08	2.32e-06	1.81e-06	Chrnd/Chrng/Myog/Tnni1/Igfbp5/Rgs4/Myh3/Myl4/Stac2/Tnnc1/Srl/Actn3/Acta2/Ptgs1/Mymk/Ttn/Actc1/Tnnc2/Myom3/Tpm2/Trim72/Tnni2/Tnnt3/Tnnt1/Atp2a1/Agtr2	26
GO:0042692	BP	GO:0042692	muscle cell differentiation	26/514	428/29008	6.35e-08	2.64e-06	2.06e-06	Myog/Igfbp5/Dner/Rgs4/Myf6/Rbm24/Mymx/Actn3/Klhl41/Nebl/Mymk/Ttn/Actc1/Cth/Msx1/Cxcl10/Smyd1/Mamstr/Alpk3/Trim72/Tnnt3/Tnnt1/Igf2/Rbpms2/Klhl40/Agtr2	26
GO:0030261	BP	GO:0030261	chromosome condensation	9/514	45/29008	8.07e-08	3.32e-06	2.59e-06	Cdk1/Top2a/Ccnb1/Incenp/Nusap1/Ncaph/Ncapg/H1f10/Ncapd2	9
GO:1904666	BP	GO:1904666	regulation of ubiquitin protein ligase activity	7/514	23/29008	1.01e-07	4.11e-06	3.2e-06	Fbxo5/Mastl/Cdkn2a/Cdc20/Mad2l1/Plk1/Ube2s	7
GO:0006323	BP	GO:0006323	DNA packaging	15/514	155/29008	1.22e-07	4.92e-06	3.84e-06	Cdk1/Cenpv/Top2a/H2bc12/H3c1/Ccnb1/Chaf1a/Incenp/Nusap1/Ncaph/Nasp/Ncapg/H1f10/Ncapd2/Asf1b	15
GO:0040001	BP	GO:0040001	establishment of mitotic spindle localization	8/514	36/29008	1.8e-07	7.18e-06	5.6e-06	Spdl1/Ndc80/Sapcd2/Nusap1/Gpsm2/Cenpa/Mad2l1/Plk1	8
GO:0009070	BP	GO:0009070	serine family amino acid biosynthetic process	6/514	16/29008	2.07e-07	8.09e-06	6.31e-06	Shmt2/Shmt1/Dhfr/Psat1/Phgdh/Cth	6
GO:0014733	BP	GO:0014733	regulation of skeletal muscle adaptation	6/514	16/29008	2.07e-07	8.09e-06	6.31e-06	Tnni1/Igfbp5/Tnnc1/Actn3/Mymk/Tnnt1	6
GO:0090307	BP	GO:0090307	mitotic spindle assembly	10/514	66/29008	2.43e-07	9.39e-06	7.33e-06	Nek2/Aurkb/Racgap1/Kif11/Tpx2/Mybl2/Cdc20/Prc1/Plk1/Kif23	10
GO:0051294	BP	GO:0051294	establishment of spindle orientation	8/514	38/29008	2.82e-07	1.08e-05	8.44e-06	Spag5/Spdl1/Ndc80/Sapcd2/Gpsm2/Cenpa/Mad2l1/Plk1	8
GO:0022412	BP	GO:0022412	cellular process involved in reproduction in multicellular organism	27/514	495/29008	3.08e-07	1.17e-05	9.13e-06	Aspm/Fbxo5/Fignl1/Top2a/Cep131/Trip13/Ccnb1/Jam2/Chtf18/Hsf2bp/Ndc80/Mastl/Mdk/Ncaph/Aurka/Tdrkh/Cenpe/Bmpr1b/Ythdc1/Plk1/Hmgb2/Spire2/Ing2/Fanca/Mns1/Ttk/Ccnb2	27
GO:0032506	BP	GO:0032506	cytokinetic process	8/514	39/29008	3.49e-07	1.31e-05	1.03e-05	Aurkb/Racgap1/Kif20a/Kif20b/Cep55/Ect2/Spire2/Anln	8
GO:0006941	BP	GO:0006941	striated muscle contraction	15/514	173/29008	5.11e-07	1.91e-05	1.49e-05	Chrnd/Chrng/Tnni1/Myh3/Myl4/Stac2/Tnnc1/Actn3/Ttn/Actc1/Tnnc2/Tnni2/Tnnt3/Tnnt1/Atp2a1	15
GO:0006310	BP	GO:0006310	DNA recombination	20/514	301/29008	5.25e-07	1.94e-05	1.51e-05	Parpbp/Fignl1/Top2a/Gen1/Trip13/Recql4/Eme2/Chtf18/Hsf2bp/Mnd1/Aunip/Rad54l/Cenps/Pms2/H1f10/Hmgb2/Ankle1/H2ax/Pif1/Apex2	20
GO:0014902	BP	GO:0014902	myotube differentiation	13/514	134/29008	8.21e-07	3e-05	2.34e-05	Myog/Dner/Myf6/Rbm24/Mymx/Actn3/Klhl41/Mymk/Cxcl10/Smyd1/Mamstr/Trim72/Klhl40	13
GO:0034502	BP	GO:0034502	protein localization to chromosome	11/514	96/29008	1.1e-06	4e-05	3.12e-05	Cdk1/Aurkb/Spdl1/Haspin/Esco2/Ndc80/Bub1b/Cenpa/Plk1/Ttk/Zwilch	11
GO:0000132	BP	GO:0000132	establishment of mitotic spindle orientation	7/514	32/29008	1.21e-06	4.34e-05	3.38e-05	Spdl1/Ndc80/Sapcd2/Gpsm2/Cenpa/Mad2l1/Plk1	7
GO:0008652	BP	GO:0008652	cellular amino acid biosynthetic process	9/514	62/29008	1.42e-06	5.04e-05	3.93e-05	Gls2/Shmt2/Shmt1/Dhfr/Psat1/Phgdh/Cth/Asns/Bcat1	9
GO:0051383	BP	GO:0051383	kinetochore organization	6/514	22/29008	1.76e-06	6.22e-05	4.85e-05	Nuf2/Dlgap5/Ndc80/Cenpe/Cenps/Cenpa	6
GO:0051315	BP	GO:0051315	attachment of mitotic spindle microtubules to kinetochore	5/514	13/29008	1.96e-06	6.85e-05	5.35e-05	Nuf2/Aurkb/Ndc80/Cenpe/Kif2c	5
GO:0061351	BP	GO:0061351	neural precursor cell proliferation	15/514	197/29008	2.63e-06	9.13e-05	7.13e-05	Kif14/Aspm/Gli2/Cd24a/Fzd3/Racgap1/Cip2a/Mdk/Nes/Melk/Tacc3/Cend1/Adgrg1/Shcbp1/Bex1	15
GO:0051438	BP	GO:0051438	regulation of ubiquitin-protein transferase activity	8/514	51/29008	3e-06	0.000103141	8.05e-05	Fbxo5/Mastl/Trib3/Cdkn2a/Cdc20/Mad2l1/Plk1/Ube2s	8
GO:0043501	BP	GO:0043501	skeletal muscle adaptation	6/514	24/29008	3.08e-06	0.000105099	8.2e-05	Tnni1/Igfbp5/Tnnc1/Actn3/Mymk/Tnnt1	6
GO:0006281	BP	GO:0006281	DNA repair	25/514	495/29008	3.34e-06	0.000112893	8.81e-05	Tdg/Parpbp/Fignl1/Gen1/Trip13/Esco2/Recql4/Chaf1a/Uhrf1/Ddx11/Eme2/Hsf2bp/Prmt6/Aunip/Rad54l/Cenps/Pms2/Kif22/Spire2/Fanca/H2ax/Pif1/Pclaf/Traip/Apex2	25
GO:0006936	BP	GO:0006936	muscle contraction	19/514	312/29008	3.64e-06	0.000122033	9.52e-05	Chrnd/Chrng/Tnni1/Myh3/Myl4/Stac2/Tnnc1/Actn3/Acta2/Ptgs1/Ttn/Actc1/Tnnc2/Myom3/Tpm2/Tnni2/Tnnt3/Tnnt1/Atp2a1	19
GO:1901989	BP	GO:1901989	positive regulation of cell cycle phase transition	11/514	111/29008	4.67e-06	0.000152958	0.000119363	Fbxo5/Cdk1/Birc5/Ccnb1/Lmnb1/Cdc25c/Fam83d/Ube2c/Aurka/Cenpe/Dbf4	11
GO:0007131	BP	GO:0007131	reciprocal meiotic recombination	8/514	54/29008	4.68e-06	0.000152958	0.000119363	Top2a/Trip13/Eme2/Chtf18/Hsf2bp/Mnd1/Rad54l/Cenps	8
GO:0140527	BP	GO:0140527	reciprocal homologous recombination	8/514	54/29008	4.68e-06	0.000152958	0.000119363	Top2a/Trip13/Eme2/Chtf18/Hsf2bp/Mnd1/Rad54l/Cenps	8
GO:0007062	BP	GO:0007062	sister chromatid cohesion	8/514	55/29008	5.39e-06	0.000172011	0.000134231	Haspin/Esco2/Recql4/Ddx11/Bub1b/Bub1/Cdc20/Kif22	8
GO:0035825	BP	GO:0035825	homologous recombination	8/514	55/29008	5.39e-06	0.000172011	0.000134231	Top2a/Trip13/Eme2/Chtf18/Hsf2bp/Mnd1/Rad54l/Cenps	8
GO:1901607	BP	GO:1901607	alpha-amino acid biosynthetic process	8/514	55/29008	5.39e-06	0.000172011	0.000134231	Gls2/Shmt2/Shmt1/Dhfr/Psat1/Phgdh/Cth/Asns	8
GO:0070507	BP	GO:0070507	regulation of microtubule cytoskeleton organization	13/514	159/29008	5.6e-06	0.000177271	0.000138335	Spag5/Ska2/Ska3/Trim36/Ska1/Tpx2/Gpsm2/Patj/Trim54/Tacc3/Gnai1/Plk1/Cep70	13
GO:0051307	BP	GO:0051307	meiotic chromosome separation	6/514	27/29008	6.49e-06	0.000202708	0.000158186	Top2a/Espl1/Eme2/Ncaph/Cenps/Ttk	6
GO:0001503	BP	GO:0001503	ossification	22/514	417/29008	6.51e-06	0.000202708	0.000158186	Myog/Igfbp5/Gli2/Fbxo5/Col13a1/Fignl1/Rsad2/Sox11/Cthrc1/Mapk11/Sp7/Actn3/Mdk/Sfrp2/Bmpr1b/Isg15/Lrrc17/Areg/Dmp1/Igf2/Foxc2/Cited1	22
GO:0031396	BP	GO:0031396	regulation of protein ubiquitination	15/514	214/29008	7.25e-06	0.000223934	0.00017475	Fbxo5/Foxf2/Skp2/Angpt1/Mastl/Trib3/Ngf/Cdkn2a/Cdc20/Isg15/Mad2l1/Plk1/Ube2s/Klhl40/Amer1	15
GO:0051445	BP	GO:0051445	regulation of meiotic cell cycle	8/514	58/29008	8.11e-06	0.000248551	0.00019396	Aspm/Fbxo5/Trip13/Cdc25c/Cdc20/Lfng/Msx1/Ttk	8
GO:0010389	BP	GO:0010389	regulation of G2/M transition of mitotic cell cycle	10/514	97/29008	8.86e-06	0.000267634	0.000208852	Kif14/Cenpf/Fbxo5/Cdk1/Ccnb1/Lmnb1/Cdc25c/Pkia/Cdkn2a/Plk1	10
GO:0051781	BP	GO:0051781	positive regulation of cell division	10/514	97/29008	8.86e-06	0.000267634	0.000208852	Kif14/Aurkb/Cenpv/Racgap1/Lbh/Kif20b/Mdk/Ect2/Igf2/Kif23	10
GO:0043393	BP	GO:0043393	regulation of protein binding	15/514	218/29008	9.06e-06	0.000271392	0.000211784	Plcl1/Spta1/Grem2/Tdg/Aurkb/Cthrc1/Angpt1/Trib3/Aurka/Nes/Ngf/Cdkn2a/Hip1r/Lfng/Plk1	15
GO:0006261	BP	GO:0006261	DNA-dependent DNA replication	12/514	142/29008	9.13e-06	0.000271653	0.000211988	Fbxo5/Gen1/Recql4/Eme2/Chtf18/Mcm10/Ccne2/Cenps/Dbf4/Ccne1/E2f8/Traip	12
GO:2000177	BP	GO:2000177	regulation of neural precursor cell proliferation	11/514	120/29008	9.92e-06	0.000292975	0.000228627	Aspm/Gli2/Cd24a/Fzd3/Cip2a/Mdk/Nes/Cend1/Adgrg1/Shcbp1/Bex1	11
GO:0034508	BP	GO:0034508	centromere complex assembly	6/514	30/29008	1.24e-05	0.000364468	0.000284417	Cenpv/Dlgap5/Cenpe/Nasp/Cenps/Cenpa	6
GO:0010830	BP	GO:0010830	regulation of myotube differentiation	7/514	45/29008	1.33e-05	0.000388112	0.000302868	Myog/Myf6/Rbm24/Actn3/Smyd1/Mamstr/Trim72	7
GO:0051147	BP	GO:0051147	regulation of muscle cell differentiation	12/514	150/29008	1.59e-05	0.000460123	0.000359063	Myog/Rgs4/Myf6/Rbm24/Actn3/Cth/Msx1/Smyd1/Mamstr/Trim72/Igf2/Rbpms2	12
GO:0090231	BP	GO:0090231	regulation of spindle checkpoint	5/514	19/29008	1.62e-05	0.000465143	0.00036298	Gen1/Ccnb1/Ndc80/Aurka/Mad2l1	5
GO:1902749	BP	GO:1902749	regulation of cell cycle G2/M phase transition	10/514	105/29008	1.79e-05	0.000510283	0.000398206	Kif14/Cenpf/Fbxo5/Cdk1/Ccnb1/Lmnb1/Cdc25c/Pkia/Cdkn2a/Plk1	10
GO:0014883	BP	GO:0014883	transition between fast and slow fiber	4/514	10/29008	1.88e-05	0.000531453	0.000414726	Tnni1/Tnnc1/Actn3/Tnnt1	4
GO:0032886	BP	GO:0032886	regulation of microtubule-based process	16/514	262/29008	2.04e-05	0.000572792	0.000446986	Spag5/Ska2/Cep131/Gen1/Ska3/Trim36/Ska1/Tpx2/Plk4/Gpsm2/Patj/Trim54/Tacc3/Gnai1/Plk1/Cep70	16
GO:0046653	BP	GO:0046653	tetrahydrofolate metabolic process	5/514	20/29008	2.13e-05	0.000594076	0.000463595	Mthfd1l/Aldh1l2/Shmt2/Shmt1/Dhfr	5
GO:0046394	BP	GO:0046394	carboxylic acid biosynthetic process	17/514	295/29008	2.39e-05	0.000661142	0.000515931	Gls2/Mthfd1l/Shmt2/Shmt1/Dhfr/Stard4/Fads1/Fads2/Psat1/Ptgs1/Trib3/Fabp5/Elovl6/Phgdh/Cth/Asns/Bcat1	17
GO:0016053	BP	GO:0016053	organic acid biosynthetic process	17/514	296/29008	2.49e-05	0.000685415	0.000534872	Gls2/Mthfd1l/Shmt2/Shmt1/Dhfr/Stard4/Fads1/Fads2/Psat1/Ptgs1/Trib3/Fabp5/Elovl6/Phgdh/Cth/Asns/Bcat1	17
GO:0014888	BP	GO:0014888	striated muscle adaptation	7/514	50/29008	2.72e-05	0.000742675	0.000579556	Myog/Tnni1/Igfbp5/Tnnc1/Actn3/Mymk/Tnnt1	7
GO:0060538	BP	GO:0060538	skeletal muscle organ development	14/514	212/29008	2.83e-05	0.000767066	0.00059859	Chrnd/Myog/Dner/Myf6/Sox11/Rbm24/Mymx/Actn3/Klhl41/Smyd1/Mylpf/Nupr1/Igf2/Klhl40	14
GO:0044771	BP	GO:0044771	meiotic cell cycle phase transition	4/514	11/29008	2.91e-05	0.000784486	0.000612184	Ndc80/Cdc25c/Ttk/Ccnb2	4
GO:0032467	BP	GO:0032467	positive regulation of cytokinesis	7/514	51/29008	3.11e-05	0.000830721	0.000648264	Kif14/Aurkb/Cenpv/Racgap1/Kif20b/Ect2/Kif23	7
GO:1901992	BP	GO:1901992	positive regulation of mitotic cell cycle phase transition	9/514	90/29008	3.18e-05	0.000844917	0.000659342	Fbxo5/Cdk1/Birc5/Ccnb1/Lmnb1/Cdc25c/Ube2c/Cenpe/Dbf4	9
GO:2000179	BP	GO:2000179	positive regulation of neural precursor cell proliferation	8/514	72/29008	4.08e-05	0.00107599	0.000839661	Aspm/Gli2/Fzd3/Cip2a/Mdk/Nes/Adgrg1/Bex1	8
GO:1903320	BP	GO:1903320	regulation of protein modification by small protein conjugation or removal	15/514	248/29008	4.11e-05	0.00107697	0.000840427	Fbxo5/Foxf2/Skp2/Angpt1/Mastl/Trib3/Ngf/Cdkn2a/Cdc20/Isg15/Mad2l1/Plk1/Ube2s/Klhl40/Amer1	15
GO:0006335	BP	GO:0006335	DNA replication-dependent nucleosome assembly	4/514	12/29008	4.31e-05	0.00110074	0.000858979	H3c1/Chaf1a/Nasp/Asf1b	4
GO:0034723	BP	GO:0034723	DNA replication-dependent nucleosome organization	4/514	12/29008	4.31e-05	0.00110074	0.000858979	H3c1/Chaf1a/Nasp/Asf1b	4
GO:0072697	BP	GO:0072697	protein localization to cell cortex	4/514	12/29008	4.31e-05	0.00110074	0.000858979	Sapcd2/Gpsm2/Gnai1/Plk1	4
GO:0140059	BP	GO:0140059	dendrite arborization	4/514	12/29008	4.31e-05	0.00110074	0.000858979	Sult4a1/Sema3a/Chrna7/Tpbg	4
GO:0009069	BP	GO:0009069	serine family amino acid metabolic process	6/514	37/29008	4.38e-05	0.00110583	0.000862949	Shmt2/Shmt1/Dhfr/Psat1/Phgdh/Cth	6
GO:0051953	BP	GO:0051953	negative regulation of amine transport	6/514	37/29008	4.38e-05	0.00110583	0.000862949	Rgs4/Ptgs1/Slc43a1/Cnr1/Htr1b/Agtr2	6
GO:0055001	BP	GO:0055001	muscle cell development	14/514	221/29008	4.46e-05	0.00111889	0.00087314	Myog/Dner/Rgs4/Myf6/Actn3/Klhl41/Nebl/Ttn/Actc1/Alpk3/Tnnt3/Tnnt1/Klhl40/Agtr2	14
GO:0031023	BP	GO:0031023	microtubule organizing center organization	11/514	141/29008	4.51e-05	0.00112291	0.000876276	Nek2/Chd3/Cep131/Gen1/Ndc80/Kif11/Aurka/Plk4/Patj/Plk1/Pclaf	11
GO:0048608	BP	GO:0048608	reproductive structure development	22/514	480/29008	5.55e-05	0.00137526	0.0010732	Aspm/Ptprn/Gli2/Vash2/Dlx3/Serpinf1/Foxf2/Angpt1/Plk4/Sfrp2/Bmpr1b/Sema3a/Lfng/Peg10/E2f8/Nupr1/Igf2/Hmgb2/Adgrg1/Ing2/Fanca/Cited1	22
GO:0090257	BP	GO:0090257	regulation of muscle system process	15/514	255/29008	5.64e-05	0.0013875	0.00108275	Myog/Tnni1/Igfbp5/Rgs4/Tnnc1/Srl/Actn3/Ptgs1/Mymk/Ttn/Tnnc2/Tnni2/Tnnt3/Tnnt1/Atp2a1	15
GO:0007140	BP	GO:0007140	male meiotic nuclear division	7/514	56/29008	5.76e-05	0.00140623	0.00109737	Fignl1/Trip13/Chtf18/Hsf2bp/Tdrkh/Ing2/Fanca	7
GO:0043624	BP	GO:0043624	cellular protein complex disassembly	11/514	145/29008	5.82e-05	0.00140623	0.00109737	Spta1/Mical1/Evl/Pdxp/Tpx2/Eif5a2/Nes/Kif24/Kif2c/Trim54/Shroom2	11
GO:1903322	BP	GO:1903322	positive regulation of protein modification by small protein conjugation or removal	11/514	145/29008	5.82e-05	0.00140623	0.00109737	Skp2/Angpt1/Mastl/Trib3/Ngf/Cdkn2a/Cdc20/Plk1/Ube2s/Klhl40/Amer1	11
GO:0007076	BP	GO:0007076	mitotic chromosome condensation	4/514	13/29008	6.14e-05	0.00146444	0.00114279	Nusap1/Ncaph/Ncapg/Ncapd2	4
GO:0035999	BP	GO:0035999	tetrahydrofolate interconversion	4/514	13/29008	6.14e-05	0.00146444	0.00114279	Mthfd1l/Shmt2/Shmt1/Dhfr	4
GO:0061458	BP	GO:0061458	reproductive system development	22/514	484/29008	6.27e-05	0.00148831	0.00116142	Aspm/Ptprn/Gli2/Vash2/Dlx3/Serpinf1/Foxf2/Angpt1/Plk4/Sfrp2/Bmpr1b/Sema3a/Lfng/Peg10/E2f8/Nupr1/Igf2/Hmgb2/Adgrg1/Ing2/Fanca/Cited1	22
GO:0050767	BP	GO:0050767	regulation of neurogenesis	21/514	451/29008	6.53e-05	0.00153924	0.00120117	Aspm/Obsl1/Cd24a/Serpinf1/Sox11/Fzd3/Sema6b/Dlx2/Mdk/Mme/Ngf/Lrp8/Ephb2/Sema3a/Sema3e/Reln/Idh2/Hmgb2/Mt3/Thy1/Bex1	21
GO:0007519	BP	GO:0007519	skeletal muscle tissue development	13/514	201/29008	6.71e-05	0.00157397	0.00122827	Chrnd/Myog/Dner/Myf6/Sox11/Rbm24/Actn3/Klhl41/Smyd1/Mylpf/Nupr1/Igf2/Klhl40	13
GO:0006760	BP	GO:0006760	folic acid-containing compound metabolic process	5/514	25/29008	6.79e-05	0.00158237	0.00123482	Mthfd1l/Aldh1l2/Shmt2/Shmt1/Dhfr	5
GO:0090224	BP	GO:0090224	regulation of spindle organization	6/514	40/29008	6.92e-05	0.00160349	0.0012513	Spag5/Tpx2/Gpsm2/Tacc3/Gnai1/Plk1	6
GO:0031398	BP	GO:0031398	positive regulation of protein ubiquitination	10/514	123/29008	7.02e-05	0.00161798	0.00126261	Skp2/Angpt1/Mastl/Trib3/Ngf/Cdc20/Plk1/Ube2s/Klhl40/Amer1	10
GO:0051261	BP	GO:0051261	protein depolymerization	10/514	124/29008	7.52e-05	0.00172253	0.0013442	Spta1/Mical1/Evl/Pdxp/Tpx2/Nes/Kif24/Kif2c/Trim54/Shroom2	10
GO:0043502	BP	GO:0043502	regulation of muscle adaptation	9/514	101/29008	7.92e-05	0.00180388	0.00140768	Myog/Tnni1/Igfbp5/Rgs4/Tnnc1/Srl/Actn3/Mymk/Tnnt1	9
GO:0070192	BP	GO:0070192	chromosome organization involved in meiotic cell cycle	8/514	79/29008	7.97e-05	0.00180609	0.00140941	Trip13/Incenp/Bub1b/Ncaph/Bub1/Ccne2/Ncapd2/Ccne1	8
GO:0045931	BP	GO:0045931	positive regulation of mitotic cell cycle	10/514	125/29008	8.05e-05	0.0018119	0.00141394	Fbxo5/Cdk1/Birc5/Ccnb1/Lmnb1/Cdc25c/Ube2c/Cenpe/Dbf4/Asns	10
GO:1901605	BP	GO:1901605	alpha-amino acid metabolic process	12/514	177/29008	8.11e-05	0.00181546	0.00141672	Gls2/Shmt2/Shmt1/Adssl1/Dhfr/Ddah2/Psat1/Ahcy/Phgdh/Cth/Asns/Gpt2	12
GO:2000241	BP	GO:2000241	regulation of reproductive process	13/514	205/29008	8.2e-05	0.00182622	0.00142512	Aspm/Fbxo5/Serpinf1/Trip13/Cdc25c/Aurka/Cnr1/Cdc20/Sema3a/Lfng/Msx1/Nupr1/Ttk	13
GO:0007098	BP	GO:0007098	centrosome cycle	10/514	128/29008	9.82e-05	0.0021739	0.00169643	Nek2/Chd3/Cep131/Gen1/Ndc80/Kif11/Aurka/Plk4/Plk1/Pclaf	10
GO:0051153	BP	GO:0051153	regulation of striated muscle cell differentiation	9/514	104/29008	9.94e-05	0.00218202	0.00170277	Myog/Rgs4/Myf6/Rbm24/Actn3/Msx1/Smyd1/Mamstr/Trim72	9
GO:0010971	BP	GO:0010971	positive regulation of G2/M transition of mitotic cell cycle	5/514	27/29008	0.000100178	0.00218202	0.00170277	Fbxo5/Cdk1/Ccnb1/Lmnb1/Cdc25c	5
GO:0051443	BP	GO:0051443	positive regulation of ubiquitin-protein transferase activity	5/514	27/29008	0.000100178	0.00218202	0.00170277	Mastl/Trib3/Cdc20/Plk1/Ube2s	5
GO:0051098	BP	GO:0051098	regulation of binding	19/514	397/29008	0.000100751	0.00218257	0.00170319	Plcl1/Spta1/Nek2/Grem2/Tdg/Aurkb/Sox11/Cthrc1/Angpt1/Trib3/Aurka/Nes/Ngf/Cdkn2a/Hip1r/Lfng/Msx1/Plk1/Hmgb2	19
GO:0048741	BP	GO:0048741	skeletal muscle fiber development	6/514	43/29008	0.000105072	0.00226388	0.00176665	Myog/Dner/Myf6/Actn3/Klhl41/Klhl40	6
GO:0044342	BP	GO:0044342	type B pancreatic cell proliferation	5/514	28/29008	0.000120188	0.00257565	0.00200994	Igfbp5/Ptprn/Igfbp4/Birc5/Nupr1	5
GO:0043648	BP	GO:0043648	dicarboxylic acid metabolic process	8/514	85/29008	0.000134109	0.0028586	0.00223075	Gls2/Mthfd1l/Aldh1l2/Shmt2/Shmt1/Adssl1/Dhfr/Gpt2	8
GO:0018105	BP	GO:0018105	peptidyl-serine phosphorylation	17/514	340/29008	0.000137431	0.00291383	0.00227385	Plcl1/Camk1g/Cdk1/Mknk2/Aurkb/Ccnb1/Angpt1/Sgk2/Mastl/Aurka/Sfrp2/Ngf/Prkg2/Plk1/Chrna7/Ttk/Rps6ka6	17
GO:0060415	BP	GO:0060415	muscle tissue morphogenesis	8/514	86/29008	0.000145604	0.00307077	0.00239632	Col3a1/Tnni1/Myf6/Tnnc1/Angpt1/Ttn/Actc1/Foxc2	8
GO:0006544	BP	GO:0006544	glycine metabolic process	4/514	16/29008	0.000149715	0.00312441	0.00243817	Shmt2/Shmt1/Dhfr/Phgdh	4
GO:0010831	BP	GO:0010831	positive regulation of myotube differentiation	4/514	16/29008	0.000149715	0.00312441	0.00243817	Myog/Rbm24/Smyd1/Mamstr	4
GO:0006275	BP	GO:0006275	regulation of DNA replication	9/514	110/29008	0.000153072	0.00317783	0.00247986	Gli2/Fbxo5/Cdk1/Gmnn/Esco2/Chtf18/Ccna2/Dbf4/E2f8	9
GO:0001649	BP	GO:0001649	osteoblast differentiation	13/514	220/29008	0.000166126	0.00343097	0.0026774	Igfbp5/Gli2/Fbxo5/Fignl1/Sox11/Cthrc1/Mapk11/Sp7/Sfrp2/Bmpr1b/Areg/Igf2/Cited1	13
GO:1902751	BP	GO:1902751	positive regulation of cell cycle G2/M phase transition	5/514	30/29008	0.000169261	0.00347771	0.00271387	Fbxo5/Cdk1/Ccnb1/Lmnb1/Cdc25c	5
GO:0014904	BP	GO:0014904	myotube cell development	6/514	47/29008	0.000174321	0.00356329	0.00278066	Myog/Dner/Myf6/Actn3/Klhl41/Klhl40	6
GO:0035914	BP	GO:0035914	skeletal muscle cell differentiation	8/514	89/29008	0.000185055	0.00376342	0.00293683	Myog/Myf6/Sox11/Rbm24/Klhl41/Smyd1/Nupr1/Klhl40	8
GO:0051382	BP	GO:0051382	kinetochore assembly	4/514	17/29008	0.000193046	0.00386673	0.00301746	Dlgap5/Cenpe/Cenps/Cenpa	4
GO:0090266	BP	GO:0090266	regulation of mitotic cell cycle spindle assembly checkpoint	4/514	17/29008	0.000193046	0.00386673	0.00301746	Gen1/Ccnb1/Ndc80/Mad2l1	4
GO:1903504	BP	GO:1903504	regulation of mitotic spindle checkpoint	4/514	17/29008	0.000193046	0.00386673	0.00301746	Gen1/Ccnb1/Ndc80/Mad2l1	4
GO:0042558	BP	GO:0042558	pteridine-containing compound metabolic process	5/514	31/29008	0.00019889	0.00396389	0.00309327	Mthfd1l/Aldh1l2/Shmt2/Shmt1/Dhfr	5
GO:0006520	BP	GO:0006520	cellular amino acid metabolic process	14/514	256/29008	0.000211654	0.00419728	0.0032754	Mars2/Gls2/Shmt2/Shmt1/Adssl1/Dhfr/Ddah2/Psat1/Ahcy/Phgdh/Cth/Asns/Bcat1/Gpt2	14
GO:0021537	BP	GO:0021537	telencephalon development	14/514	257/29008	0.000220299	0.00434709	0.00339231	Col3a1/Kif14/Aspm/Slitrk5/Sema6b/Dlx2/Mdk/Lrp8/Ephb2/Sema3a/Tacc3/Reln/Aqp1/Adgrg1	14
GO:0050905	BP	GO:0050905	neuromuscular process	12/514	199/29008	0.000243508	0.0047814	0.00373122	Chrnd/Chrng/Tnni1/Myh3/Stac2/Tnnc1/Actn3/Tnnc2/Tnni2/Tnnt3/Tnnt1/Atp2a1	12
GO:0051642	BP	GO:0051642	centrosome localization	5/514	33/29008	0.000269836	0.00522589	0.00407809	Aspm/Dlgap5/Aurka/Gpsm2/Mad2l1	5
GO:1903792	BP	GO:1903792	negative regulation of anion transport	5/514	33/29008	0.000269836	0.00522589	0.00407809	Rgs4/Slc43a1/Prkg2/Htr1b/Agtr2	5
GO:0048644	BP	GO:0048644	muscle organ morphogenesis	8/514	94/29008	0.000270079	0.00522589	0.00407809	Col3a1/Tnni1/Myf6/Tnnc1/Angpt1/Ttn/Actc1/Foxc2	8
GO:0065004	BP	GO:0065004	protein-DNA complex assembly	10/514	145/29008	0.000273283	0.00526234	0.00410653	Cenpv/H2bc12/H3c1/Dlgap5/Chaf1a/Cenpe/Nasp/Cenps/Cenpa/Asf1b	10
GO:0006575	BP	GO:0006575	cellular modified amino acid metabolic process	12/514	202/29008	0.000279304	0.00535243	0.00417684	Mthfd1l/Slc16a10/Aldh1l2/Shmt2/Shmt1/Mboat2/Dhfr/Chac1/Ahcy/Cth/Reln/Hmgn5	12
GO:0000079	BP	GO:0000079	regulation of cyclin-dependent protein serine/threonine kinase activity	7/514	72/29008	0.000287037	0.00547431	0.00427195	Ccnb1/Ccna2/Ccne2/Cdkn2a/Plk1/Ccne1/Ccnb2	7
GO:0061842	BP	GO:0061842	microtubule organizing center localization	5/514	34/29008	0.000311786	0.00591799	0.00461818	Aspm/Dlgap5/Aurka/Gpsm2/Mad2l1	5
GO:0015837	BP	GO:0015837	amine transport	9/514	121/29008	0.0003139	0.00592988	0.00462746	Rgs4/Slc18a2/Ptgs1/Slc43a1/Cnr1/Chrna7/Arl6ip1/Htr1b/Agtr2	9
GO:0018209	BP	GO:0018209	peptidyl-serine modification	17/514	365/29008	0.000315647	0.00593476	0.00463127	Plcl1/Camk1g/Cdk1/Mknk2/Aurkb/Ccnb1/Angpt1/Sgk2/Mastl/Aurka/Sfrp2/Ngf/Prkg2/Plk1/Chrna7/Ttk/Rps6ka6	17
GO:0010721	BP	GO:0010721	negative regulation of cell development	12/514	205/29008	0.000319471	0.00597845	0.00466536	Cd24a/Sox11/Fbln1/Sema6b/Tjp2/Dlx2/Ephb2/Sema3a/Sema3e/Idh2/Mt3/Thy1	12
GO:0031589	BP	GO:0031589	cell-substrate adhesion	17/514	366/29008	0.000325734	0.00606718	0.0047346	Col3a1/Kif14/Col13a1/Fbln1/Angpt1/St6gal1/Actn3/Mdk/Lama5/Cdkn2a/Sema3e/Emilin1/Dmp1/Zyx/Thy1/Col5a3/Coro2b	17
GO:0048738	BP	GO:0048738	cardiac muscle tissue development	14/514	269/29008	0.000350223	0.00649298	0.00506688	Tnni1/Rgs4/Cdk1/Ccnb1/Tnnc1/Angpt1/Mapk11/Nebl/Ttn/Actc1/Alpk3/Foxc2/Dipk2a/Agtr2	14
GO:0060419	BP	GO:0060419	heart growth	9/514	123/29008	0.00035448	0.00654147	0.00510472	Rgs4/Cdk1/Ccnb1/Mapk11/Ttn/Foxc2/Dipk2a/Agtr2/Dusp9	9
GO:0051149	BP	GO:0051149	positive regulation of muscle cell differentiation	7/514	75/29008	0.000369541	0.00678798	0.00529708	Myog/Myf6/Rbm24/Actn3/Cth/Smyd1/Mamstr	7
GO:0030010	BP	GO:0030010	establishment of cell polarity	10/514	151/29008	0.000378031	0.00691206	0.00539392	Spag5/Spdl1/Ndc80/Kif20b/Sapcd2/Gpsm2/Cenpa/Mad2l1/Plk1/Amot	10
GO:0031032	BP	GO:0031032	actomyosin structure organization	12/514	210/29008	0.000397284	0.00723093	0.00564275	Evl/Racgap1/Klhl41/Nebl/Ttn/Actc1/Ect2/Zyx/Tnnt3/Tnnt1/Anln/Coro2b	12
GO:1904029	BP	GO:1904029	regulation of cyclin-dependent protein kinase activity	7/514	76/29008	0.000400907	0.0072637	0.00566832	Ccnb1/Ccna2/Ccne2/Cdkn2a/Plk1/Ccne1/Ccnb2	7
GO:0060236	BP	GO:0060236	regulation of mitotic spindle organization	5/514	36/29008	0.000410303	0.00740031	0.00577493	Tpx2/Gpsm2/Tacc3/Gnai1/Plk1	5
GO:2001222	BP	GO:2001222	regulation of neuron migration	6/514	55/29008	0.000417691	0.00749963	0.00585243	Col3a1/Kif20b/Mdk/Sema3a/Reln/Adgrg1	6
GO:0043500	BP	GO:0043500	muscle adaptation	9/514	127/29008	0.000448671	0.00801975	0.00625831	Myog/Tnni1/Igfbp5/Rgs4/Tnnc1/Srl/Actn3/Mymk/Tnnt1	9
GO:0045137	BP	GO:0045137	development of primary sexual characteristics	13/514	244/29008	0.000451731	0.0080384	0.00627287	Aspm/Ptprn/Cbx2/Angpt1/Sfrp2/Bmpr1b/Sema3a/Lfng/Nupr1/Hmgb2/Adgrg1/Ing2/Fanca	13
GO:1901861	BP	GO:1901861	regulation of muscle tissue development	6/514	56/29008	0.000460898	0.00816506	0.00637171	Myog/Igfbp5/Cenpf/Myf6/Actn3/Igf2	6
GO:0016572	BP	GO:0016572	histone phosphorylation	5/514	37/29008	0.000467564	0.00824458	0.00643377	Aurkb/Haspin/Ccnb1/Incenp/Ccna2	5
GO:0001763	BP	GO:0001763	morphogenesis of a branching structure	13/514	245/29008	0.000469523	0.00824458	0.00643377	Gli2/Col13a1/Angpt1/Dlx2/Mdk/Lama5/Sfrp2/Sema3a/Sema3e/Areg/Foxc2/Agtr2/Maged1	13
GO:0003002	BP	GO:0003002	regionalization	17/514	379/29008	0.000484586	0.00847176	0.00661105	Gli2/Grem2/Myf6/Gas1/Arc/Dlx2/Ttn/Aurka/Sfrp2/Bmpr1b/Sema3a/Lfng/Reln/Msx1/Adgrg1/Foxc2/Mns1	17
GO:0072698	BP	GO:0072698	protein localization to microtubule cytoskeleton	6/514	57/29008	0.000507508	0.00883373	0.00689352	Spag5/Cep131/Kif20b/Fam83d/Aurka/Ttk	6
GO:0044843	BP	GO:0044843	cell cycle G1/S phase transition	12/514	216/29008	0.000511244	0.00886008	0.00691408	Kif14/Cdk18/Haspin/Gas1/Skp2/Fam83d/Ccna2/Ccne2/Cdkn2a/Nasp/Dbf4/Ccne1	12
GO:0007015	BP	GO:0007015	actin filament organization	19/514	453/29008	0.000527764	0.00902861	0.00704559	Spta1/Rgs4/Mical1/Gas2l3/Evl/Diaph3/Pdxp/Cdc42ep3/Dpysl3/Nebl/Ttn/Actc1/Tpm2/Hip1r/Zyx/Pdlim3/Spire2/Coro2b/Shroom2	19
GO:0010563	BP	GO:0010563	negative regulation of phosphorus metabolic process	19/514	453/29008	0.000527764	0.00902861	0.00704559	Fam72a/Myog/Mical1/Lpcat1/Ccnb1/Fbln1/Angpt1/Actn3/Mastl/Trib3/Pkia/Sfrp2/Cdkn2a/Ephb2/Emilin1/Plk1/Chrna7/Nupr1/Thy1	19
GO:0045936	BP	GO:0045936	negative regulation of phosphate metabolic process	19/514	453/29008	0.000527764	0.00902861	0.00704559	Fam72a/Myog/Mical1/Lpcat1/Ccnb1/Fbln1/Angpt1/Actn3/Mastl/Trib3/Pkia/Sfrp2/Cdkn2a/Ephb2/Emilin1/Plk1/Chrna7/Nupr1/Thy1	19
GO:1901976	BP	GO:1901976	regulation of cell cycle checkpoint	5/514	38/29008	0.000530637	0.00903898	0.00705368	Gen1/Ccnb1/Ndc80/Aurka/Mad2l1	5
GO:2001224	BP	GO:2001224	positive regulation of neuron migration	4/514	22/29008	0.0005531	0.00938151	0.00732099	Kif20b/Mdk/Sema3a/Reln	4
GO:0005819	CC	GO:0005819	spindle	45/520	332/28886	4.33e-26	1.61e-23	1.22e-23	Kif14/Aspm/Nek2/Cenpf/Fbxo5/Cdk1/Aurkb/Spag5/Ska2/Birc5/Spdl1/Cenpv/Haspin/Ccnb1/Dlgap5/Ska3/Espl1/Racgap1/Ddx11/Kif20a/Ska1/Kif20b/Kif11/Incenp/Bub1b/Knstrn/Nusap1/Tpx2/Fam83d/Ckap2l/Aurka/Plk4/Cenpe/Ect2/Gpsm2/Aunip/Kif2c/Cdca8/Tacc3/Mad2l1/Prc1/Plk1/Kif22/Ttk/Kif23	45
GO:0000775	CC	GO:0000775	chromosome, centromeric region	34/520	202/28886	4.34e-23	8.05e-21	6.12e-21	Nek2/Nuf2/Cenpf/Aurkb/Spag5/Ska2/Birc5/Spdl1/Cenpv/Top2a/Mis18bp1/Ccnb1/Ska3/Esco2/Ndc80/Ska1/Incenp/Bub1b/Knstrn/Bub1/Cenpe/Kif2c/Cdca8/Cenps/Cenpa/Ncapg/Mad2l1/Ncapd2/Plk1/Mki67/Ttk/Spc24/Zwilch/Ercc6l	34
GO:0000779	CC	GO:0000779	condensed chromosome, centromeric region	29/520	145/28886	4.54e-22	5.62e-20	4.27e-20	Nek2/Nuf2/Cenpf/Aurkb/Spag5/Ska2/Birc5/Spdl1/Cenpv/Ccnb1/Ska3/Ndc80/Ska1/Incenp/Bub1b/Knstrn/Bub1/Cenpe/Kif2c/Cenps/Cenpa/Ncapg/Mad2l1/Ncapd2/Plk1/Ttk/Spc24/Zwilch/Ercc6l	29
GO:0000776	CC	GO:0000776	kinetochore	27/520	135/28886	1.24e-20	1.15e-18	8.71e-19	Nek2/Nuf2/Cenpf/Aurkb/Spag5/Ska2/Birc5/Spdl1/Cenpv/Ccnb1/Ska3/Ndc80/Ska1/Incenp/Bub1b/Knstrn/Bub1/Cenpe/Kif2c/Cenps/Cenpa/Mad2l1/Plk1/Ttk/Spc24/Zwilch/Ercc6l	27
GO:0098687	CC	GO:0098687	chromosomal region	37/520	301/28886	3.66e-20	2.71e-18	2.06e-18	Nek2/Nuf2/Cenpf/Aurkb/Spag5/Ska2/Birc5/Spdl1/Cenpv/Top2a/Mis18bp1/Ccnb1/Ska3/Esco2/Recql4/Ndc80/Ska1/Incenp/Bub1b/Knstrn/Bub1/Cenpe/Kif2c/Cdca8/Cenps/Cenpa/Ncapg/Mad2l1/Ncapd2/Plk1/Mki67/H2ax/Pif1/Ttk/Spc24/Zwilch/Ercc6l	37
GO:0000793	CC	GO:0000793	condensed chromosome	34/520	300/28886	1.61e-17	9.97e-16	7.58e-16	Nek2/Nuf2/Cenpf/Aurkb/Spag5/Ska2/Birc5/Spdl1/Cenpv/Top2a/Ccnb1/Ska3/Ndc80/Ska1/Incenp/Bub1b/Knstrn/Ttn/Bub1/Cenpe/Kif2c/Cenps/Cenpa/Ncapg/Mad2l1/Ncapd2/Plk1/Mki67/Hmgb2/H2ax/Ttk/Spc24/Zwilch/Ercc6l	34
GO:0072686	CC	GO:0072686	mitotic spindle	25/520	161/28886	1.89e-16	1e-14	7.62e-15	Aspm/Cdk1/Aurkb/Spag5/Ska3/Espl1/Racgap1/Ska1/Kif20b/Kif11/Knstrn/Nusap1/Tpx2/Fam83d/Ckap2l/Aurka/Cenpe/Ect2/Gpsm2/Tacc3/Mad2l1/Prc1/Plk1/Kif22/Kif23	25
GO:0030496	CC	GO:0030496	midbody	26/520	183/28886	4.38e-16	2.03e-14	1.54e-14	Kif14/Aspm/Nek2/Cenpf/Mical1/Cdk1/Aurkb/Birc5/Cenpv/Pdxp/Racgap1/Ddx11/Kif20a/Kif20b/Cep55/Incenp/Cenpe/Ect2/Cdca8/Gnai1/Prc1/Plk1/Anln/Kif23/Kif4/Klhl13	26
GO:0000940	CC	GO:0000940	outer kinetochore	10/520	14/28886	3.08e-15	1.27e-13	9.65e-14	Cenpf/Ska2/Spdl1/Ccnb1/Ska3/Ndc80/Ska1/Bub1b/Cenpe/Plk1	10
GO:0000922	CC	GO:0000922	spindle pole	19/520	141/28886	1.07e-11	3.95e-10	3.01e-10	Aspm/Nek2/Cenpf/Aurkb/Spag5/Spdl1/Ccnb1/Dlgap5/Ddx11/Kif20b/Kif11/Tpx2/Fam83d/Aurka/Plk4/Gpsm2/Aunip/Mad2l1/Plk1	19
GO:0051233	CC	GO:0051233	spindle midzone	11/520	38/28886	4.49e-11	1.52e-09	1.15e-09	Kif14/Aurkb/Cenpv/Racgap1/Kif20b/Incenp/Aurka/Cenpe/Cdca8/Prc1/Plk1	11
GO:0005874	CC	GO:0005874	microtubule	31/520	427/28886	6.52e-11	2.01e-09	1.53e-09	Kif14/Aspm/Nek2/Cdk1/Gas2l3/Aurkb/Spag5/Ska2/Birc5/Reep4/Ska3/Kif20a/Ska1/Kif20b/Kif11/Incenp/Knstrn/Nusap1/Tpx2/Aurka/Cenpe/Kif24/Kif2c/Trim54/Prc1/Plk1/Kif22/Mt3/Kif23/Kif4/Shroom2	31
GO:0005865	CC	GO:0005865	striated muscle thin filament	9/520	23/28886	1.21e-10	3.45e-09	2.63e-09	Tnni1/Tnnc1/Actn3/Ttn/Tnnc2/Tpm2/Tnni2/Tnnt3/Tnnt1	9
GO:0036379	CC	GO:0036379	myofilament	9/520	27/28886	6.51e-10	1.73e-08	1.31e-08	Tnni1/Tnnc1/Actn3/Ttn/Tnnc2/Tpm2/Tnni2/Tnnt3/Tnnt1	9
GO:0043292	CC	GO:0043292	contractile fiber	20/520	235/28886	1.18e-08	2.91e-07	2.21e-07	Tnni1/Myh3/Myl4/Tnnc1/Actn3/Acta2/Klhl41/Myl9/Nebl/Ttn/Actc1/Tnnc2/Myom3/Tpm2/Tnni2/Tnnt3/Tnnt1/Atp2a1/Pdlim3/Klhl40	20
GO:0030017	CC	GO:0030017	sarcomere	18/520	197/28886	2.12e-08	4.91e-07	3.73e-07	Tnni1/Myl4/Tnnc1/Actn3/Klhl41/Myl9/Nebl/Ttn/Actc1/Tnnc2/Myom3/Tpm2/Tnni2/Tnnt3/Tnnt1/Atp2a1/Pdlim3/Klhl40	18
GO:0030016	CC	GO:0030016	myofibril	18/520	222/28886	1.32e-07	2.88e-06	2.19e-06	Tnni1/Myl4/Tnnc1/Actn3/Klhl41/Myl9/Nebl/Ttn/Actc1/Tnnc2/Myom3/Tpm2/Tnni2/Tnnt3/Tnnt1/Atp2a1/Pdlim3/Klhl40	18
GO:0097431	CC	GO:0097431	mitotic spindle pole	8/520	37/28886	2.55e-07	5.26e-06	4e-06	Aspm/Aurkb/Spag5/Kif20b/Fam83d/Aurka/Gpsm2/Plk1	8
GO:0045171	CC	GO:0045171	intercellular bridge	11/520	85/28886	3.72e-07	6.94e-06	5.28e-06	Mical1/Cep131/Kif20a/Kif20b/Cep55/Tpx2/Fam83d/Cdca8/Prc1/Nupr1/Kif23	11
GO:0005876	CC	GO:0005876	spindle microtubule	10/520	68/28886	3.74e-07	6.94e-06	5.28e-06	Cdk1/Aurkb/Ska2/Birc5/Ska3/Ska1/Kif11/Aurka/Cenpe/Plk1	10
GO:0005875	CC	GO:0005875	microtubule associated complex	14/520	154/28886	8.32e-07	1.47e-05	1.12e-05	Kif14/Aurkb/Birc5/Kif20a/Kif20b/Incenp/Acta2/Actc1/Aurka/Kif2c/Cdca8/Trim54/Kif22/Kif23	14
GO:0000307	CC	GO:0000307	cyclin-dependent protein kinase holoenzyme complex	7/520	43/28886	1.08e-05	0.000182436	0.000138723	Cdk1/Ccnb1/Ccna2/Cks1b/Ccne2/Ccne1/Ccnb2	7
GO:0044815	CC	GO:0044815	DNA packaging complex	8/520	73/28886	5.04e-05	0.000812369	0.000617718	H2bc12/H3c1/Ncaph/H2az1/Cenpa/Ncapg/Ncapd2/H2ax	8
GO:0031672	CC	GO:0031672	A band	6/520	38/28886	5.6e-05	0.000830551	0.000631544	Myl4/Klhl41/Ttn/Myom3/Atp2a1/Klhl40	6
GO:0032154	CC	GO:0032154	cleavage furrow	6/520	38/28886	5.6e-05	0.000830551	0.000631544	Pdxp/Racgap1/Kif20a/Mastl/Ect2/Spire2	6
GO:0070938	CC	GO:0070938	contractile ring	4/520	13/28886	6.52e-05	0.000930897	0.000707846	Pdxp/Kif20b/Prc1/Anln	4
GO:0032153	CC	GO:0032153	cell division site	7/520	58/28886	8e-05	0.0010992	0.000835823	Pdxp/Racgap1/Kif20a/Mastl/Ect2/Spire2/Anln	7
GO:1990023	CC	GO:1990023	mitotic spindle midzone	4/520	15/28886	0.00012103	0.00160365	0.0012194	Aurkb/Kif20b/Cenpe/Prc1	4
GO:0072687	CC	GO:0072687	meiotic spindle	4/520	16/28886	0.000159082	0.00198626	0.00151034	Aspm/Fbxo5/Incenp/Aurka	4
GO:0034451	CC	GO:0034451	centriolar satellite	9/520	109/28886	0.000160614	0.00198626	0.00151034	Spag5/Chd3/Cep131/Dlgap5/Cep55/Knstrn/Patj/Tacc3/Plk1	9
GO:0010369	CC	GO:0010369	chromocenter	4/520	17/28886	0.000205078	0.00245432	0.00186624	Aurkb/Esco2/Incenp/Cdca8	4
GO:0005871	CC	GO:0005871	kinesin complex	6/520	52/28886	0.000333675	0.00386855	0.00294161	Kif14/Kif20a/Kif20b/Kif2c/Kif22/Kif23	6
GO:0045120	CC	GO:0045120	pronucleus	4/520	23/28886	0.000700428	0.00787451	0.00598771	Cenpf/Aurka/Ccna2/Ncapd2	4
GO:1902554	CC	GO:1902554	serine/threonine protein kinase complex	7/520	84/28886	0.000807018	0.00873227	0.00663994	Cdk1/Ccnb1/Ccna2/Cks1b/Ccne2/Ccne1/Ccnb2	7
GO:0005923	CC	GO:0005923	bicellular tight junction	9/520	136/28886	0.000823799	0.00873227	0.00663994	Jam2/Tjp2/Sapcd2/Ect2/Patj/Cldn4/Adcyap1r1/Amot/Shroom2	9
GO:0008017	MF	GO:0008017	microtubule binding	27/505	266/28438	3.74e-13	2.4e-10	2.07e-10	Kif14/Vash2/Gas2l3/Spag5/Ska2/Birc5/Reep4/Dlgap5/Racgap1/Kif20a/Ska1/Kif20b/Kif11/Knstrn/Nusap1/Tpx2/Fam83d/Cenpe/Kif24/Kif2c/Trim54/Prc1/Plk1/Kif22/Spc24/Kif23/Kif4	27
GO:0015631	MF	GO:0015631	tubulin binding	29/505	380/28438	6.01e-11	1.92e-08	1.66e-08	Kif14/Vash2/Gas2l3/Spag5/Ska2/Birc5/Reep4/Dlgap5/Racgap1/Kif20a/Trim36/Ska1/Kif20b/Kif11/Knstrn/Nusap1/Tpx2/Fam83d/Cenpe/Kif24/Kif2c/Trim54/Prc1/Plk1/Kif22/Cep70/Spc24/Kif23/Kif4	29
GO:0003779	MF	GO:0003779	actin binding	28/505	444/28438	9.19e-09	1.96e-06	1.69e-06	Tnni1/Spta1/Vash2/Mical1/Gas2l3/Myh3/Myl4/Evl/Adssl1/Tnnc1/Diaph3/Sntb1/Arc/Actn3/Nebl/Ttn/Tnnc2/Myom3/Tpm2/Hip1r/Tnni2/Lsp1/Tnnt3/Pdlim3/Spire2/Anln/Coro2b/Shroom2	28
GO:0019887	MF	GO:0019887	protein kinase regulator activity	17/505	197/28438	9.87e-08	1.52e-05	1.31e-05	Cd24a/Ccnb1/Incenp/Tpx2/Trib3/Pkia/Ngf/Ccna2/Cks1b/Bmpr1b/Ccne2/Cdkn2a/Dbf4/Ccne1/Igf2/Mt3/Ccnb2	17
GO:0004674	MF	GO:0004674	protein serine/threonine kinase activity	26/505	441/28438	1.19e-07	1.52e-05	1.31e-05	Nek2/Cdk18/Camk1g/Cdk1/Mknk2/Aurkb/Camkk1/Haspin/Mapk11/Pkmyt1/Bub1b/Sgk2/Mastl/Ttn/Bub1/Aurka/Plk4/Bmpr1b/Melk/Dbf4/Prkg2/Alpk3/Plk1/Sbk3/Ttk/Rps6ka6	26
GO:0003777	MF	GO:0003777	microtubule motor activity	10/505	65/28438	2.13e-07	2.27e-05	1.96e-05	Kif14/Kif20a/Kif20b/Kif11/Cenpe/Kif24/Kif2c/Kif22/Kif23/Kif4	10
GO:0003774	MF	GO:0003774	cytoskeletal motor activity	12/505	107/28438	4.65e-07	4.25e-05	3.67e-05	Kif14/Myh3/Kif20a/Kif20b/Kif11/Actc1/Cenpe/Kif24/Kif2c/Kif22/Kif23/Kif4	12
GO:0019207	MF	GO:0019207	kinase regulator activity	17/505	229/28438	8.39e-07	6.71e-05	5.8e-05	Cd24a/Ccnb1/Incenp/Tpx2/Trib3/Pkia/Ngf/Ccna2/Cks1b/Bmpr1b/Ccne2/Cdkn2a/Dbf4/Ccne1/Igf2/Mt3/Ccnb2	17
GO:0051015	MF	GO:0051015	actin filament binding	15/505	219/28438	9.79e-06	0.000696336	0.000601277	Spta1/Gas2l3/Myh3/Myl4/Adssl1/Tnnc1/Actn3/Nebl/Ttn/Tnnc2/Myom3/Tpm2/Hip1r/Coro2b/Shroom2	15
GO:0016538	MF	GO:0016538	cyclin-dependent protein serine/threonine kinase regulator activity	7/505	47/28438	1.82e-05	0.00106113	0.000916268	Ccnb1/Ccna2/Cks1b/Ccne2/Cdkn2a/Ccne1/Ccnb2	7
GO:0030295	MF	GO:0030295	protein kinase activator activity	10/505	105/28438	1.82e-05	0.00106113	0.000916268	Cd24a/Ccnb1/Incenp/Tpx2/Ngf/Cks1b/Bmpr1b/Dbf4/Igf2/Mt3	10
GO:0019209	MF	GO:0019209	kinase activator activity	10/505	112/28438	3.2e-05	0.00170879	0.00147551	Cd24a/Ccnb1/Incenp/Tpx2/Ngf/Cks1b/Bmpr1b/Dbf4/Igf2/Mt3	10
GO:0106310	MF	GO:0106310	protein serine kinase activity	15/505	246/28438	3.83e-05	0.00188465	0.00162737	Nek2/Mknk2/Aurkb/Haspin/Pkmyt1/Bub1b/Sgk2/Mastl/Ttn/Bub1/Aurka/Melk/Alpk3/Sbk3/Rps6ka6	15
GO:0016887	MF	GO:0016887	ATP hydrolysis activity	14/505	223/28438	5.03e-05	0.00229903	0.00198518	Kif14/Bbs10/Myh3/Fignl1/Trip13/Hspa1l/Chtf18/Kif20a/Kif20b/Bbs12/Kif2c/Pms2/Kif22/Kif23	14
GO:0000900	MF	GO:0000900	translation repressor activity, mRNA regulatory element binding	4/505	13/28438	6.19e-05	0.00263951	0.00227918	Shmt2/Purb/Shmt1/Dhfr	4
GO:0035173	MF	GO:0035173	histone kinase activity	4/505	16/28438	0.000150943	0.0060377	0.00521348	Cdk1/Aurkb/Haspin/Aurka	4
GO:0008574	MF	GO:0008574	plus-end-directed microtubule motor activity	4/505	17/28438	0.000194623	0.007327	0.00632677	Kif14/Kif20b/Kif11/Cenpe	4
GO:0003678	MF	GO:0003678	DNA helicase activity	7/505	69/28438	0.000222829	0.00792282	0.00684125	Chd3/Recql4/Ddx11/Chtf18/Rad54l/Pif1/Ercc6l	7

## Sheet: ASC48_up_GO
Supplementary Table S1. Transcriptomic changes upon YTHDC1 iKO in ASC.
GO analysis of up-regulated genes in ASC 48h upon YTHDC1 iKO.
	ONTOLOGY	ID	Description	GeneRatio	BgRatio	pvalue	p.adjust	qvalue	geneID	Count
GO:0001819	BP	GO:0001819	positive regulation of cytokine production	36/659	500/29008	1.48658e-09	6.83232e-06	5.21711e-06	Cd34/Cd55/Irak3/Lrp1/Ccl2/Sphk1/Lgals9/Wnt5a/Rgcc/Gsdmd/Zbtb20/Runx1/Mapk13/Gpsm3/Rftn1/Cd14/Unc93b1/Afap1l2/Pla2r1/Sulf2/S100a13/Ptpn22/F3/Il6ra/Tek/Ddx58/Ereg/Nod1/Prkd2/Wnt11/Il4ra/Adam8/Cyba/Rora/Il20rb/Ulbp1	36
GO:0045765	BP	GO:0045765	regulation of angiogenesis	26/659	302/29008	7.93166e-09	1.59511e-05	1.21801e-05	Cd34/Lif/Ccl2/Sphk1/Pgf/Wnt5a/Ptk2b/Rgcc/Acvrl1/Runx1/Thbs2/Eng/Cd59a/Mmp9/F3/Efna3/S100a1/Ecm1/Tek/Plxnd1/Alox5/Prkd2/Adm/Prkcb/Hmox1/Ctsh	26
GO:1901342	BP	GO:1901342	regulation of vasculature development	26/659	306/29008	1.04119e-08	1.59511e-05	1.21801e-05	Cd34/Lif/Ccl2/Sphk1/Pgf/Wnt5a/Ptk2b/Rgcc/Acvrl1/Runx1/Thbs2/Eng/Cd59a/Mmp9/F3/Efna3/S100a1/Ecm1/Tek/Plxnd1/Alox5/Prkd2/Adm/Prkcb/Hmox1/Ctsh	26
GO:0002831	BP	GO:0002831	regulation of response to biotic stimulus	27/659	337/29008	1.88528e-08	1.70523e-05	1.3021e-05	Dusp10/Cd55/Ikbke/Mr1/Tnfaip3/Irak3/Igtp/Lgals9/Pomc/Wnt5a/Tap1/Tap2/Gfer/Nmi/Ptpn22/Ddx58/Cxcl5/Ereg/Clec2d/Nod1/Htra1/Trim12a/Trim12c/Adam8/Mmp2/Cyba/Ulbp1	27
GO:0010875	BP	GO:0010875	positive regulation of cholesterol efflux	9/659	31/29008	1.96867e-08	1.70523e-05	1.3021e-05	Lrp1/Abca8b/Abca8a/Nfkbia/Abca3/Abcg1/Nr1h3/Pltp/Abca1	9
GO:0002683	BP	GO:0002683	negative regulation of immune system process	32/659	460/29008	2.7417e-08	1.70523e-05	1.3021e-05	Dusp10/Cd55/Fstl3/Tnfaip3/Irak3/Ccl2/Lgals9/Nr1d1/Cd80/Runx1/Tap1/Tap2/Gfer/Smad7/Fas/Cd59a/Nmi/Nr1h3/Ptpn22/Pag1/Padi2/Tmem176a/Gpnmb/Cxcl12/Clec2d/Tmem176b/Il4ra/Htra1/Hmox1/Il20rb/Tcta/Tsc22d3	32
GO:0090287	BP	GO:0090287	regulation of cellular response to growth factor stimulus	25/659	299/29008	2.74314e-08	1.70523e-05	1.3021e-05	Fstl3/Lrp1/Il17rd/Wnt5a/Ptp4a3/Acvrl1/Crim1/Wfikkn1/Ldlrad4/Smad7/Fgfbp3/Eng/Cd59a/Bmp2/Sulf2/Pmepa1/Tek/Ptprf/Htra3/Tgfbr3/Prkd2/Rgma/Prkcb/Htra1/Zfp423	25
GO:0019882	BP	GO:0019882	antigen processing and presentation	16/659	126/29008	2.96819e-08	1.70523e-05	1.3021e-05	Mr1/Tapbp/Tap1/Psmb8/Tap2/H2-K1/Psmb9/H2-T24/H2-T23/H2-T22/Rftn1/Unc93b1/Gba/Nod1/Relb/Icam1	16
GO:0019221	BP	GO:0019221	cytokine-mediated signaling pathway	29/659	397/29008	4.31686e-08	2.20448e-05	1.68332e-05	Ikbke/Irak3/Igtp/Ccl2/Ccl7/Sphk1/Ifi27/Nfkbia/Il3ra/Wnt5a/Ptk2b/Osmr/Crebrf/Csf2ra/Traf1/Nmi/F3/Il6ra/Ecm1/Il11ra1/Padi2/Cntfr/Ptprf/Cxcl5/Ereg/Cxcl12/Ifitm3/Bbs4/Il20rb	29
GO:0038061	BP	GO:0038061	NIK/NF-kappaB signaling	15/659	116/29008	6.26313e-08	2.66466e-05	2.03471e-05	Egfr/Sphk1/Ptp4a3/Card10/Cd14/Pdcd4/Lime1/Nmi/Ptpn22/Tek/Nod1/Relb/Smpd3/Birc3/Ikbkg	15
GO:0070374	BP	GO:0070374	positive regulation of ERK1 and ERK2 cascade	21/659	227/29008	6.37755e-08	2.66466e-05	2.03471e-05	Ccn2/Esr1/Lrp1/Egfr/Ccl2/Ccl7/Ptk2b/Fgfbp3/Bmp2/Dusp15/Ptpn22/Tek/Gpnmb/Cxcl12/Calcr/Nod1/Prkd2/Pde8a/Necab2/Nrg1/Icam1	21
GO:0002221	BP	GO:0002221	pattern recognition receptor signaling pathway	18/659	171/29008	7.89156e-08	2.89309e-05	2.20915e-05	Esr1/Tnfaip3/Irak3/Igtp/Lgals9/Nr1d1/Nfkbia/Rftn1/Cd14/Unc93b1/Nmi/Nr1h3/Ptpn22/Ddx58/Nod1/Clpb/Cyba/Mapkapk3	18
GO:0031099	BP	GO:0031099	regeneration	17/659	153/29008	8.18325e-08	2.89309e-05	2.20915e-05	Dusp10/Lgr6/Lrp1/Lif/Gfer/Fas/Bdnf/Sulf2/Ptprf/Cxcl5/Tec/Cxcl12/Rgma/Adm/Hmox1/Mmp2/Nrg1	17
GO:0007178	BP	GO:0007178	transmembrane receptor protein serine/threonine kinase signaling pathway	28/659	387/29008	9.00282e-08	2.9555e-05	2.2568e-05	Fstl3/Lrp1/Fam83g/Ccl2/Jade2/Lgals9/Hivep1/Il17rd/Wnt5a/Gdnf/Acvrl1/Itgb5/Crim1/Wfikkn1/Ldlrad4/Smad7/Pdcd4/Eng/Bmp2/Dusp15/Pmepa1/Htra3/Tgfbr3/Rgma/Htra1/Zfp423/Smpd3/Trf	28
GO:0031341	BP	GO:0031341	regulation of cell killing	16/659	139/29008	1.19793e-07	3.46941e-05	2.64922e-05	Cd55/Mr1/Ccl2/Lgals9/Pomc/Tap1/Tap2/Gfer/H2-K1/H2-T24/H2-T23/H2-T22/Cd59a/Cxcl5/Clec2d/Ulbp1	16
GO:1905954	BP	GO:1905954	positive regulation of lipid localization	15/659	123/29008	1.37819e-07	3.46941e-05	2.64922e-05	Ikbke/Lrp1/Abca8b/Abca8a/Nfkbia/Fitm1/Runx1/Abca3/Abcg1/Pla2r1/Nr1h3/Pltp/Abca1/Plin2/Atp8a1	15
GO:0070371	BP	GO:0070371	ERK1 and ERK2 cascade	26/659	349/29008	1.46506e-07	3.46941e-05	2.64922e-05	Dusp10/Atf3/Ccn2/Esr1/Lrp1/Lif/Egfr/Ccl2/Ccl7/Ptk2b/Fgfbp3/Bmp2/Dusp15/Ptpn22/Tek/Gpnmb/Cxcl12/Calcr/Nod1/Prkd2/Pde8a/Necab2/Nrg1/Icam1/Ctsh/Trf	26
GO:0072676	BP	GO:0072676	lymphocyte migration	14/659	107/29008	1.48071e-07	3.46941e-05	2.64922e-05	Ccl2/Ccl7/Cxcl16/Lgals9/Cxcl14/Wnt5a/Ptk2b/Gba/Ecm1/Padi2/Cxcl12/Hsd3b7/Adam8/Icam1	14
GO:0050900	BP	GO:0050900	leukocyte migration	27/659	373/29008	1.51182e-07	3.46941e-05	2.64922e-05	Cd34/Ccl2/Ccl7/Cxcl16/Lgals9/Pgf/Cxcl14/Wnt5a/Mmp14/Ptk2b/Gpsm3/Mmp9/Gba/Ptpn22/Ecm1/Padi2/Cxcl5/P2rx4/Cxcl12/Alox5/Hsd3b7/Adam8/Dpep1/Smpd3/Icam1/Dapk2/Fut4	27
GO:0045766	BP	GO:0045766	positive regulation of angiogenesis	18/659	179/29008	1.58524e-07	3.46941e-05	2.64922e-05	Cd34/Sphk1/Pgf/Wnt5a/Ptk2b/Acvrl1/Runx1/Eng/Mmp9/F3/S100a1/Ecm1/Tek/Prkd2/Adm/Prkcb/Hmox1/Ctsh	18
GO:1904018	BP	GO:1904018	positive regulation of vasculature development	18/659	179/29008	1.58524e-07	3.46941e-05	2.64922e-05	Cd34/Sphk1/Pgf/Wnt5a/Ptk2b/Acvrl1/Runx1/Eng/Mmp9/F3/S100a1/Ecm1/Tek/Prkd2/Adm/Prkcb/Hmox1/Ctsh	18
GO:0001935	BP	GO:0001935	endothelial cell proliferation	18/659	181/29008	1.8753e-07	3.91767e-05	2.99151e-05	Cd34/Ccl2/Pgf/Wnt5a/Egr3/Rgcc/Acvrl1/Eng/Bmp2/F3/Ecm1/Tek/Cxcl12/Alox5/Prkd2/Hmox1/Cyba/Aldh1a2	18
GO:0050678	BP	GO:0050678	regulation of epithelial cell proliferation	28/659	403/29008	2.07541e-07	4.14722e-05	3.16679e-05	Dusp10/Esr1/Tnfaip3/Egfr/Ccl2/Nr1d1/Nkx2-9/Pgf/Wnt5a/Egr3/Rgcc/Acvrl1/Mcc/Eng/Bmp2/Sulf2/F3/Ecm1/Tek/Tgfbr3/Cxcl12/Alox5/Ccnd2/Prkd2/Htra1/Hmox1/Cyba/Aldh1a2	28
GO:0002685	BP	GO:0002685	regulation of leukocyte migration	20/659	223/29008	2.16881e-07	4.15327e-05	3.17141e-05	Ccl2/Ccl7/Lgals9/Pgf/Cxcl14/Wnt5a/Mmp14/Ptk2b/Gpsm3/Mmp9/Ptpn22/Ecm1/Padi2/P2rx4/Cxcl12/Adam8/Smpd3/Icam1/Dapk2/Fut4	20
GO:0001936	BP	GO:0001936	regulation of endothelial cell proliferation	17/659	166/29008	2.68501e-07	4.93613e-05	3.76919e-05	Ccl2/Pgf/Wnt5a/Egr3/Rgcc/Acvrl1/Eng/Bmp2/F3/Ecm1/Tek/Cxcl12/Alox5/Prkd2/Hmox1/Cyba/Aldh1a2	17
GO:0048247	BP	GO:0048247	lymphocyte chemotaxis	10/659	54/29008	3.3264e-07	5.71831e-05	4.36646e-05	Ccl2/Ccl7/Cxcl16/Cxcl14/Wnt5a/Ptk2b/Padi2/Cxcl12/Hsd3b7/Adam8	10
GO:0040013	BP	GO:0040013	negative regulation of locomotion	25/659	341/29008	3.4285e-07	5.71831e-05	4.36646e-05	Dusp10/Lrp1/Ccl2/Gm266/Wnt5a/Rgcc/Acvrl1/Card10/Ldlrad4/Mcc/Fas/Sema4g/Eng/Pfn2/Trp53inp1/Padi2/Podn/Tgfbr3/Cxcl12/Sema4f/Sema4b/Wnt11/Ifitm3/Dpep1/Nrg1	25
GO:0010874	BP	GO:0010874	regulation of cholesterol efflux	9/659	42/29008	3.48374e-07	5.71831e-05	4.36646e-05	Lrp1/Abca8b/Abca8a/Nfkbia/Abca3/Abcg1/Nr1h3/Pltp/Abca1	9
GO:0050673	BP	GO:0050673	epithelial cell proliferation	30/659	471/29008	4.92982e-07	7.81291e-05	5.96588e-05	Dusp10/Cd34/Esr1/Tnfaip3/Egfr/Ccl2/Nr1d1/Nkx2-9/Pgf/Wnt5a/Egr3/Rgcc/Acvrl1/Mcc/Eng/Bmp2/Sulf2/F3/Ecm1/Tek/Ereg/Tgfbr3/Cxcl12/Alox5/Ccnd2/Prkd2/Htra1/Hmox1/Cyba/Aldh1a2	30
GO:0070372	BP	GO:0070372	regulation of ERK1 and ERK2 cascade	24/659	326/29008	5.44537e-07	8.08547e-05	6.17401e-05	Dusp10/Atf3/Ccn2/Esr1/Lrp1/Lif/Egfr/Ccl2/Ccl7/Ptk2b/Fgfbp3/Bmp2/Dusp15/Ptpn22/Tek/Gpnmb/Cxcl12/Calcr/Nod1/Prkd2/Pde8a/Necab2/Nrg1/Icam1	24
GO:0032102	BP	GO:0032102	negative regulation of response to external stimulus	27/659	398/29008	5.45365e-07	8.08547e-05	6.17401e-05	Dusp10/Cd34/Serpine2/Tnfaip3/Irak3/Ccl2/Lgals9/Nr1d1/Wnt5a/Pros1/Tap1/Tap2/Gfer/Sema4g/Nmi/Nr1h3/Thbd/Padi2/Clec2d/Sema4f/Alox5/Rgma/Sema4b/Htra1/Rora/Bbs4/Il20rb	27
GO:0001910	BP	GO:0001910	regulation of leukocyte mediated cytotoxicity	14/659	120/29008	6.21698e-07	8.7401e-05	6.67388e-05	Mr1/Ccl2/Lgals9/Pomc/Tap1/Tap2/Gfer/H2-K1/H2-T24/H2-T23/H2-T22/Cxcl5/Clec2d/Ulbp1	14
GO:0032373	BP	GO:0032373	positive regulation of sterol transport	9/659	45/29008	6.51553e-07	8.7401e-05	6.67388e-05	Lrp1/Abca8b/Abca8a/Nfkbia/Abca3/Abcg1/Nr1h3/Pltp/Abca1	9
GO:0032376	BP	GO:0032376	positive regulation of cholesterol transport	9/659	45/29008	6.51553e-07	8.7401e-05	6.67388e-05	Lrp1/Abca8b/Abca8a/Nfkbia/Abca3/Abcg1/Nr1h3/Pltp/Abca1	9
GO:0032103	BP	GO:0032103	positive regulation of response to external stimulus	28/659	427/29008	6.65587e-07	8.7401e-05	6.67388e-05	Ikbke/Lrp1/Igtp/Ccl2/Ccl7/Lgals9/Pomc/Nfkbia/Pgf/Cxcl14/Wnt5a/Ptk2b/Gpsm3/Pdcd4/Nmi/Ereg/P2rx4/Cxcl12/Nod1/Prkd2/Trim12a/Trim12c/Adam8/Mmp2/Nrg1/Cyba/Dapk2/Ulbp1	28
GO:0002224	BP	GO:0002224	toll-like receptor signaling pathway	14/659	124/29008	9.29563e-07	0.000118674	9.06188e-05	Esr1/Tnfaip3/Irak3/Lgals9/Nr1d1/Nfkbia/Rftn1/Cd14/Unc93b1/Nmi/Nr1h3/Ptpn22/Cyba/Mapkapk3	14
GO:1905952	BP	GO:1905952	regulation of lipid localization	17/659	183/29008	1.0695e-06	0.00013285	0.000101443	Ikbke/Lrp1/Abca8b/Abca8a/Pomc/Nfkbia/Fitm1/Runx1/Abca3/Abcg1/Pla2r1/Nr1h3/Pltp/Abca1/Plin2/Atp8a1/Nrg1	17
GO:0090101	BP	GO:0090101	negative regulation of transmembrane receptor protein serine/threonine kinase signaling pathway	14/659	128/29008	1.36746e-06	0.000165391	0.000126292	Fstl3/Lrp1/Il17rd/Wnt5a/Crim1/Wfikkn1/Ldlrad4/Smad7/Eng/Bmp2/Pmepa1/Htra3/Tgfbr3/Htra1	14
GO:2000401	BP	GO:2000401	regulation of lymphocyte migration	10/659	63/29008	1.47851e-06	0.000173191	0.000132247	Ccl2/Ccl7/Lgals9/Cxcl14/Wnt5a/Ptk2b/Ecm1/Padi2/Cxcl12/Adam8	10
GO:0045785	BP	GO:0045785	positive regulation of cell adhesion	29/659	471/29008	1.50732e-06	0.000173191	0.000132247	Dusp10/Cd55/Fstl3/Lif/Ccl2/Rac3/Lgals9/Sox4/Wnt5a/Egr3/Ptk2b/Triobp/Cd80/Ccdc80/Runx1/Smad7/Cd59a/Ptpn22/Il6ra/Tek/Pdpn/Cxcl12/Alox5/Prkd2/Il4ra/Adam8/Nrg1/Icam1/Fut4	29
GO:0002698	BP	GO:0002698	negative regulation of immune effector process	14/659	130/29008	1.64904e-06	0.000183417	0.000140056	Dusp10/Cd55/Tnfaip3/Irak3/Lgals9/Tap1/Tap2/Gfer/Smad7/Cd59a/Clec2d/Il4ra/Hmox1/Il20rb	14
GO:0051341	BP	GO:0051341	regulation of oxidoreductase activity	12/659	95/29008	1.67614e-06	0.000183417	0.000140056	Esr1/Egfr/Lgals9/Sirt5/Ptk2b/Gdnf/Npr3/Eng/S100a1/Nod1/Alox5/Cyba	12
GO:0002697	BP	GO:0002697	regulation of immune effector process	27/659	424/29008	1.83541e-06	0.000195973	0.000149644	Dusp10/Cd55/Mr1/Tnfaip3/Irak3/Ccl2/Lgals9/Pomc/Wnt5a/Tap1/Tap2/Gfer/H2-K1/H2-T24/H2-T23/H2-T22/Smad7/Cd59a/Ptpn22/Tek/Ddx58/Cxcl5/Clec2d/Il4ra/Hmox1/Il20rb/Ulbp1	27
GO:1901222	BP	GO:1901222	regulation of NIK/NF-kappaB signaling	12/659	96/29008	1.87649e-06	0.000195973	0.000149644	Egfr/Sphk1/Ptp4a3/Cd14/Pdcd4/Lime1/Nmi/Ptpn22/Tek/Nod1/Smpd3/Birc3	12
GO:0051090	BP	GO:0051090	regulation of DNA-binding transcription factor activity	27/659	425/29008	1.9188e-06	0.000195973	0.000149644	Ikbke/Esr1/Tnfaip3/Irak3/Thra/Sphk1/Nfkbia/Wnt5a/Rgcc/Parp10/Pim1/Smad7/Bdnf/Bmp2/Traf1/Ddx58/Tgfbr3/Bhlhe40/Nod1/Prkd2/Prkcb/Trim12a/Trim12c/Adam8/Hmox1/Icam1/Ikbkg	27
GO:0002687	BP	GO:0002687	positive regulation of leukocyte migration	15/659	153/29008	2.33033e-06	0.00022865	0.000174596	Ccl2/Ccl7/Lgals9/Pgf/Cxcl14/Wnt5a/Mmp14/Ptk2b/Gpsm3/Mmp9/P2rx4/Cxcl12/Adam8/Icam1/Dapk2	15
GO:0030509	BP	GO:0030509	BMP signaling pathway	16/659	173/29008	2.33824e-06	0.00022865	0.000174596	Fstl3/Fam83g/Hivep1/Wnt5a/Acvrl1/Crim1/Smad7/Pdcd4/Eng/Bmp2/Htra3/Tgfbr3/Rgma/Htra1/Zfp423/Smpd3	16
GO:0001906	BP	GO:0001906	cell killing	20/659	260/29008	2.43507e-06	0.0002318	0.000177001	Cd55/Mr1/Lyz2/Ccl2/Lgals9/Pomc/Cxcl14/Tap1/Tap2/Gfer/H2-K1/H2-T24/H2-T23/H2-T22/Cd59a/Cxcl5/Cxcl12/Clec2d/Ctsh/Ulbp1	20
GO:0022407	BP	GO:0022407	regulation of cell-cell adhesion	28/659	457/29008	2.50444e-06	0.0002318	0.000177001	Dusp10/Serpine2/Cd55/Fstl3/Tnfaip3/Ccl2/Lgals9/Sox4/Wnt5a/Egr3/Rgcc/Cd80/Runx1/Smad7/Cd59a/Bmp2/Ptpn22/Pag1/Il6ra/Pdpn/Gpnmb/Cxcl12/Alox5/Il4ra/Adam8/Icam1/Fut4/Il20rb	28
GO:0032635	BP	GO:0032635	interleukin-6 production	16/659	174/29008	2.52175e-06	0.0002318	0.000177001	Psen2/Tnfaip3/Irak3/Lgals9/Wnt5a/Zbtb20/Mapk13/Unc93b1/Afap1l2/Gba/Ptpn22/Il6ra/Ddx58/Ereg/Nod1/Cyba	16
GO:0001938	BP	GO:0001938	positive regulation of endothelial cell proliferation	12/659	99/29008	2.61023e-06	0.000235228	0.000179619	Ccl2/Pgf/Wnt5a/Egr3/Acvrl1/Bmp2/F3/Ecm1/Cxcl12/Prkd2/Hmox1/Cyba	12
GO:0045088	BP	GO:0045088	regulation of innate immune response	18/659	217/29008	2.67498e-06	0.000236427	0.000180534	Dusp10/Ikbke/Tnfaip3/Irak3/Igtp/Lgals9/Wnt5a/Tap1/Tap2/Gfer/Nmi/Ereg/Clec2d/Trim12a/Trim12c/Adam8/Mmp2/Ulbp1	18
GO:0062197	BP	GO:0062197	cellular response to chemical stress	23/659	333/29008	2.7663e-06	0.000239885	0.000183174	Aifm2/Tnfaip3/Egfr/Sphk1/Bdkrb2/Dapk1/Aqp5/Mapk13/Gfer/Nme5/Fas/Mmp9/Pla2r1/Slc4a11/Trp53inp1/Sod3/Alox5/Pde8a/Arntl/Relb/Hmox1/Mmp2/Smpd3	23
GO:0032370	BP	GO:0032370	positive regulation of lipid transport	12/659	100/29008	2.90566e-06	0.000247304	0.00018884	Lrp1/Abca8b/Abca8a/Nfkbia/Runx1/Abca3/Abcg1/Pla2r1/Nr1h3/Pltp/Abca1/Atp8a1	12
GO:0030336	BP	GO:0030336	negative regulation of cell migration	21/659	293/29008	4.19589e-06	0.000350624	0.000267734	Dusp10/Lrp1/Ccl2/Gm266/Rgcc/Acvrl1/Card10/Ldlrad4/Mcc/Fas/Eng/Pfn2/Trp53inp1/Padi2/Podn/Tgfbr3/Cxcl12/Wnt11/Ifitm3/Dpep1/Nrg1	21
GO:0071560	BP	GO:0071560	cellular response to transforming growth factor beta stimulus	18/659	226/29008	4.74067e-06	0.000389073	0.000297094	Lrp1/Ccl2/Il17rd/Gdnf/Acvrl1/Itgb5/Runx1/Wfikkn1/Ldlrad4/Smad7/Eng/Bmp2/Dusp15/Pmepa1/Htra3/Tgfbr3/Htra1/Wwox	18
GO:0071772	BP	GO:0071772	response to BMP	16/659	184/29008	5.20636e-06	0.000412559	0.000315027	Fstl3/Fam83g/Hivep1/Wnt5a/Acvrl1/Crim1/Smad7/Pdcd4/Eng/Bmp2/Htra3/Tgfbr3/Rgma/Htra1/Zfp423/Smpd3	16
GO:0071773	BP	GO:0071773	cellular response to BMP stimulus	16/659	184/29008	5.20636e-06	0.000412559	0.000315027	Fstl3/Fam83g/Hivep1/Wnt5a/Acvrl1/Crim1/Smad7/Pdcd4/Eng/Bmp2/Htra3/Tgfbr3/Rgma/Htra1/Zfp423/Smpd3	16
GO:0007179	BP	GO:0007179	transforming growth factor beta receptor signaling pathway	16/659	186/29008	5.98056e-06	0.000448665	0.000342598	Lrp1/Ccl2/Il17rd/Gdnf/Acvrl1/Itgb5/Wfikkn1/Ldlrad4/Smad7/Eng/Bmp2/Dusp15/Pmepa1/Htra3/Tgfbr3/Htra1	16
GO:0043030	BP	GO:0043030	regulation of macrophage activation	9/659	58/29008	6.02025e-06	0.000448665	0.000342598	Shpk/Sphk1/Lgals9/Nr1d1/Wnt5a/Nr1h3/Il4ra/Rora/Ulbp1	9
GO:0051353	BP	GO:0051353	positive regulation of oxidoreductase activity	9/659	58/29008	6.02025e-06	0.000448665	0.000342598	Esr1/Lgals9/Ptk2b/Gdnf/Npr3/S100a1/Nod1/Alox5/Cyba	9
GO:0071559	BP	GO:0071559	response to transforming growth factor beta	18/659	230/29008	6.05249e-06	0.000448665	0.000342598	Lrp1/Ccl2/Il17rd/Gdnf/Acvrl1/Itgb5/Runx1/Wfikkn1/Ldlrad4/Smad7/Eng/Bmp2/Dusp15/Pmepa1/Htra3/Tgfbr3/Htra1/Wwox	18
GO:0032675	BP	GO:0032675	regulation of interleukin-6 production	15/659	166/29008	6.39565e-06	0.000466578	0.000356276	Tnfaip3/Irak3/Lgals9/Wnt5a/Zbtb20/Mapk13/Unc93b1/Afap1l2/Gba/Ptpn22/Il6ra/Ddx58/Ereg/Nod1/Cyba	15
GO:0060394	BP	GO:0060394	negative regulation of pathway-restricted SMAD protein phosphorylation	5/659	13/29008	6.59439e-06	0.000473559	0.000361607	Lrp1/Ldlrad4/Smad7/Eng/Pmepa1	5
GO:0001909	BP	GO:0001909	leukocyte mediated cytotoxicity	15/659	168/29008	7.40096e-06	0.000522997	0.000399357	Mr1/Ccl2/Lgals9/Pomc/Tap1/Tap2/Gfer/H2-K1/H2-T24/H2-T23/H2-T22/Cxcl5/Clec2d/Ctsh/Ulbp1	15
GO:0030512	BP	GO:0030512	negative regulation of transforming growth factor beta receptor signaling pathway	10/659	75/29008	7.5104e-06	0.000522997	0.000399357	Lrp1/Il17rd/Wfikkn1/Ldlrad4/Smad7/Bmp2/Pmepa1/Htra3/Tgfbr3/Htra1	10
GO:2000146	BP	GO:2000146	negative regulation of cell motility	21/659	306/29008	8.19619e-06	0.000558162	0.000426208	Dusp10/Lrp1/Ccl2/Gm266/Rgcc/Acvrl1/Card10/Ldlrad4/Mcc/Fas/Eng/Pfn2/Trp53inp1/Padi2/Podn/Tgfbr3/Cxcl12/Wnt11/Ifitm3/Dpep1/Nrg1	21
GO:0015850	BP	GO:0015850	organic hydroxy compound transport	20/659	282/29008	8.25827e-06	0.000558162	0.000426208	Lrp1/Selenom/Abca8b/Abca8a/Pomc/Nfkbia/Sncg/Gdnf/Abca3/Abcg1/Syt13/Nr1h3/Pltp/Chrnb2/Abca1/Cxcl12/Prkcb/Syt17/Nrg1/Smpd3	20
GO:0071706	BP	GO:0071706	tumor necrosis factor superfamily cytokine production	16/659	191/29008	8.38476e-06	0.000558498	0.000426465	Cd34/Psen2/Tnfaip3/Irak3/Ccl2/Lgals9/Pomc/Wnt5a/Zbtb20/Cd14/Ptpn22/Ddx58/Gpnmb/Nod1/Adam8/Cyba	16
GO:0001666	BP	GO:0001666	response to hypoxia	17/659	214/29008	8.95509e-06	0.000587966	0.000448967	Cd34/Pgf/Rgcc/Pygm/Eng/Bmp2/Chrnb2/Tek/Plekhn1/Fosl2/Sod3/Prkcb/Cpeb1/Adam8/Hmox1/Mmp2/Rora	17
GO:0048762	BP	GO:0048762	mesenchymal cell differentiation	18/659	237/29008	9.15232e-06	0.000592452	0.000452392	Axin2/Rian/Il17rd/Wnt5a/Rgcc/Gdnf/Ldlrad4/Smad7/Sema4g/Pdcd4/Eng/Bmp2/Pdpn/Tgfbr3/Sema4f/Sema4b/Wnt11/Aldh1a2	18
GO:0050679	BP	GO:0050679	positive regulation of epithelial cell proliferation	17/659	215/29008	9.52262e-06	0.00060786	0.000464158	Esr1/Tnfaip3/Egfr/Ccl2/Pgf/Wnt5a/Egr3/Acvrl1/Bmp2/F3/Ecm1/Cxcl12/Ccnd2/Prkd2/Htra1/Hmox1/Cyba	17
GO:1901623	BP	GO:1901623	regulation of lymphocyte chemotaxis	6/659	23/29008	9.754e-06	0.000614101	0.000468923	Ccl2/Ccl7/Cxcl14/Wnt5a/Ptk2b/Padi2	6
GO:0007162	BP	GO:0007162	negative regulation of cell adhesion	21/659	310/29008	9.98807e-06	0.00062034	0.000473687	Serpine2/Tnfaip3/Lrp1/Lgals9/Mmp14/Rgcc/Acvrl1/Cd80/Runx1/Smad7/Bmp2/Ptpn22/Pag1/Gpnmb/Cxcl12/Plxnd1/Il4ra/Adam8/Mmp2/Il20rb/Arhgap6	21
GO:0033344	BP	GO:0033344	cholesterol efflux	9/659	62/29008	1.05796e-05	0.000648316	0.00049505	Lrp1/Abca8b/Abca8a/Nfkbia/Abca3/Abcg1/Nr1h3/Pltp/Abca1	9
GO:0032368	BP	GO:0032368	regulation of lipid transport	14/659	153/29008	1.11973e-05	0.00065306	0.000498672	Lrp1/Abca8b/Abca8a/Pomc/Nfkbia/Runx1/Abca3/Abcg1/Pla2r1/Nr1h3/Pltp/Abca1/Atp8a1/Nrg1	14
GO:0031346	BP	GO:0031346	positive regulation of cell projection organization	26/659	441/29008	1.11982e-05	0.00065306	0.000498672	Serpine2/Dnm3/Ahi1/Grip1/Lrp1/Lif/Sphk1/Camk2b/Plek2/Wnt5a/Ptk2b/Bdnf/Serpini1/Ptprf/Espn/Cxcl5/Cxcl12/Plxnd1/Rgma/Arap1/Cdc42ep5/Scn1b/Cpeb1/Nrg1/Fez1/Bbs4	26
GO:0052547	BP	GO:0052547	regulation of peptidase activity	26/659	441/29008	1.11982e-05	0.00065306	0.000498672	Serpine2/Perp/Ccn2/Cstb/Wdr35/Dapk1/Anxa8/Psmb8/Wfikkn1/Psmb9/Fas/Gsn/Mmp9/Serpini1/F3/Lxn/Efna3/Ecm1/Tfpi2/Nod1/Pbp2/Mgmt/Tnfrsf23/Dpep1/Ctsh/Renbp	26
GO:0022409	BP	GO:0022409	positive regulation of cell-cell adhesion	20/659	288/29008	1.12545e-05	0.00065306	0.000498672	Dusp10/Cd55/Fstl3/Ccl2/Lgals9/Sox4/Wnt5a/Egr3/Cd80/Runx1/Smad7/Cd59a/Ptpn22/Il6ra/Pdpn/Alox5/Il4ra/Adam8/Icam1/Fut4	20
GO:0036293	BP	GO:0036293	response to decreased oxygen levels	18/659	241/29008	1.15038e-05	0.00065306	0.000498672	Cd34/Cpeb4/Pgf/Rgcc/Pygm/Eng/Bmp2/Chrnb2/Tek/Plekhn1/Fosl2/Sod3/Prkcb/Cpeb1/Adam8/Hmox1/Mmp2/Rora	18
GO:0032768	BP	GO:0032768	regulation of monooxygenase activity	8/659	48/29008	1.15095e-05	0.00065306	0.000498672	Esr1/Egfr/Ptk2b/Gdnf/Npr3/Eng/S100a1/Nod1	8
GO:0050999	BP	GO:0050999	regulation of nitric-oxide synthase activity	7/659	35/29008	1.16963e-05	0.000655563	0.000500584	Esr1/Egfr/Ptk2b/Npr3/Eng/S100a1/Nod1	7
GO:0061572	BP	GO:0061572	actin filament bundle organization	15/659	175/29008	1.21186e-05	0.000671048	0.000512408	Ccn2/Gas7/Ptk2b/Rgcc/Triobp/Itgb5/Kank3/Pfn2/Synpo2/Espn/Rflna/Wnt11/Arap1/Bbs4/Arhgap6	15
GO:0001667	BP	GO:0001667	ameboidal-type cell migration	26/659	444/29008	1.25999e-05	0.000687877	0.000525258	Dusp10/Wnt5a/Ltb4r2/Egr3/Ptk2b/Rgcc/Gdnf/Ptp4a3/Acvrl1/Card10/Mcc/Sema4g/Mmp9/Pfn2/Tek/P2rx4/Tgfbr3/Cxcl12/Sema4f/Plxnd1/Prkd2/Sema4b/Wnt11/Adam8/Hmox1/Ctsh	26
GO:0051271	BP	GO:0051271	negative regulation of cellular component movement	21/659	315/29008	1.27218e-05	0.000687877	0.000525258	Dusp10/Lrp1/Ccl2/Gm266/Rgcc/Acvrl1/Card10/Ldlrad4/Mcc/Fas/Eng/Pfn2/Trp53inp1/Padi2/Podn/Tgfbr3/Cxcl12/Wnt11/Ifitm3/Dpep1/Nrg1	21
GO:0051091	BP	GO:0051091	positive regulation of DNA-binding transcription factor activity	19/659	267/29008	1.3169e-05	0.000703774	0.000537397	Ikbke/Esr1/Irak3/Sphk1/Wnt5a/Rgcc/Bdnf/Bmp2/Traf1/Ddx58/Tgfbr3/Nod1/Prkd2/Prkcb/Trim12a/Trim12c/Adam8/Icam1/Ikbkg	19
GO:0060485	BP	GO:0060485	mesenchyme development	20/659	293/29008	1.44636e-05	0.000764076	0.000583443	Axin2/Rian/Il17rd/Wnt5a/Rgcc/Gdnf/Acvrl1/Ldlrad4/Smad7/Sema4g/Pdcd4/Eng/Bmp2/Pdpn/Tgfbr3/Sema4f/Sema4b/Wnt11/Dchs1/Aldh1a2	20
GO:0001558	BP	GO:0001558	regulation of cell growth	26/659	450/29008	1.58921e-05	0.000830004	0.000633785	Serpine2/Lrp1/Egfr/Sphk1/Cxcl16/Il3ra/Wnt5a/Mmp14/Ptk2b/Acvrl1/Smad7/Sema4g/Bdnf/Psrc1/Zmat3/Cxcl12/Sema4f/Sertad3/Rgma/Sema4b/Wnt11/Hsd3b7/Syt17/Nrg1/Rrad/Cyba	26
GO:0034599	BP	GO:0034599	cellular response to oxidative stress	19/659	271/29008	1.62213e-05	0.000837676	0.000639643	Aifm2/Tnfaip3/Egfr/Sphk1/Dapk1/Mapk13/Gfer/Nme5/Mmp9/Pla2r1/Slc4a11/Trp53inp1/Sod3/Alox5/Pde8a/Arntl/Hmox1/Mmp2/Smpd3	19
GO:0050767	BP	GO:0050767	regulation of neurogenesis	26/659	451/29008	1.65112e-05	0.00084317	0.000643839	Dusp10/Serpine2/Per2/Zfp365/Lrp1/Lif/Camk2b/Jade2/Nr1d1/Atxn1/Wnt5a/Syngap1/Fas/Sema4g/Bdnf/Bmp2/Ptprf/Bhlhe40/Cxcl12/Sema4f/Plxnd1/Rgma/Sema4b/Arntl/Nrg1/Trf	26
GO:0070482	BP	GO:0070482	response to oxygen levels	20/659	296/29008	1.67628e-05	0.000846616	0.00064647	Cd34/Cpeb4/Pgf/Rgcc/Pygm/Fas/Eng/Bmp2/Chrnb2/Tek/Pdpn/Plekhn1/Fosl2/Sod3/Prkcb/Cpeb1/Adam8/Hmox1/Mmp2/Rora	20
GO:0002703	BP	GO:0002703	regulation of leukocyte mediated immunity	20/659	297/29008	1.75992e-05	0.000879195	0.000671347	Cd55/Mr1/Ccl2/Lgals9/Pomc/Tap1/Tap2/Gfer/H2-K1/H2-T24/H2-T23/H2-T22/Smad7/Ddx58/Cxcl5/Clec2d/Il4ra/Hmox1/Il20rb/Ulbp1	20
GO:0060389	BP	GO:0060389	pathway-restricted SMAD protein phosphorylation	9/659	66/29008	1.78076e-05	0.000880041	0.000671993	Lrp1/Lgals9/Acvrl1/Ldlrad4/Smad7/Eng/Bmp2/Pmepa1/Tgfbr3	9
GO:0071674	BP	GO:0071674	mononuclear cell migration	15/659	181/29008	1.8113e-05	0.000885611	0.000676247	Ccl2/Ccl7/Cxcl16/Lgals9/Cxcl14/Wnt5a/Ptk2b/Gba/Ecm1/Padi2/Cxcl12/Alox5/Hsd3b7/Adam8/Icam1	15
GO:0046686	BP	GO:0046686	response to cadmium ion	7/659	38/29008	2.06919e-05	0.00100105	0.000764397	Slc30a1/Egfr/Camk2b/Gsn/Mmp9/Hmox1/Mt2	7
GO:0030510	BP	GO:0030510	regulation of BMP signaling pathway	11/659	102/29008	2.0989e-05	0.00100146	0.00076471	Fstl3/Wnt5a/Acvrl1/Crim1/Smad7/Eng/Htra3/Tgfbr3/Rgma/Htra1/Zfp423	11
GO:0043087	BP	GO:0043087	regulation of GTPase activity	21/659	326/29008	2.12428e-05	0.00100146	0.00076471	Ccl2/Ccl7/Sgsm2/Arhgap27/Wnt5a/Ptk2b/Syngap1/Tbc1d12/Garnl3/Tbc1d2/Fzd10/Rasa4/Arap2/Plxnd1/Rgma/Wnt11/Arap1/Gmip/Icam1/Bbs4/Arhgap6	21
GO:1990845	BP	GO:1990845	adaptive thermogenesis	14/659	162/29008	2.14206e-05	0.00100146	0.00076471	Pm20d1/Per2/Thra/Nr1d1/Tshr/Lpin1/Npr3/Bscl2/Nr1h3/Acot11/Gpr3/Arntl/Il4ra/Zfp423	14
GO:0050777	BP	GO:0050777	negative regulation of immune response	16/659	206/29008	2.1572e-05	0.00100146	0.00076471	Dusp10/Cd55/Tnfaip3/Irak3/Lgals9/Tap1/Tap2/Gfer/Smad7/Cd59a/Nmi/Clec2d/Il4ra/Htra1/Hmox1/Il20rb	16
GO:0090092	BP	GO:0090092	regulation of transmembrane receptor protein serine/threonine kinase signaling pathway	18/659	253/29008	2.21429e-05	0.00101769	0.000777098	Fstl3/Lrp1/Lgals9/Il17rd/Wnt5a/Acvrl1/Crim1/Wfikkn1/Ldlrad4/Smad7/Eng/Bmp2/Pmepa1/Htra3/Tgfbr3/Rgma/Htra1/Zfp423	18
GO:2000403	BP	GO:2000403	positive regulation of lymphocyte migration	7/659	39/29008	2.47269e-05	0.0011252	0.000859192	Ccl7/Lgals9/Cxcl14/Wnt5a/Ptk2b/Cxcl12/Adam8	7
GO:1903555	BP	GO:1903555	regulation of tumor necrosis factor superfamily cytokine production	15/659	186/29008	2.49753e-05	0.00112536	0.000859314	Cd34/Tnfaip3/Irak3/Ccl2/Lgals9/Pomc/Wnt5a/Zbtb20/Cd14/Ptpn22/Ddx58/Gpnmb/Nod1/Adam8/Cyba	15
GO:0002237	BP	GO:0002237	response to molecule of bacterial origin	24/659	409/29008	2.60475e-05	0.00116228	0.000887506	Dusp10/Cd55/Tnfaip3/Irak3/Igtp/Shpk/Ccl2/Cxcl16/Lgals9/Nr1d1/Nfkbia/Wnt5a/Cd80/Tap2/Cd14/Pdcd4/Nr1h3/Ptpn22/Abca1/Cxcl5/Adm/Trim12a/Trim12c/Mapkapk3	24
GO:0031100	BP	GO:0031100	animal organ regeneration	6/659	27/29008	2.64723e-05	0.00116987	0.000893305	Lif/Gfer/Sulf2/Cxcl5/Cxcl12/Hmox1	6
GO:0010631	BP	GO:0010631	epithelial cell migration	20/659	306/29008	2.69883e-05	0.00118132	0.000902046	Dusp10/Wnt5a/Ltb4r2/Egr3/Ptk2b/Rgcc/Ptp4a3/Acvrl1/Card10/Mcc/Mmp9/Pfn2/Tek/P2rx4/Tgfbr3/Plxnd1/Prkd2/Adam8/Hmox1/Ctsh	20
GO:0032640	BP	GO:0032640	tumor necrosis factor production	15/659	188/29008	2.83062e-05	0.00122113	0.000932448	Cd34/Psen2/Tnfaip3/Irak3/Ccl2/Lgals9/Pomc/Wnt5a/Zbtb20/Cd14/Ptpn22/Ddx58/Gpnmb/Nod1/Cyba	15
GO:0120161	BP	GO:0120161	regulation of cold-induced thermogenesis	13/659	145/29008	2.84293e-05	0.00122113	0.000932448	Per2/Thra/Nr1d1/Tshr/Lpin1/Npr3/Bscl2/Nr1h3/Acot11/Gpr3/Arntl/Il4ra/Zfp423	13
GO:0090132	BP	GO:0090132	epithelium migration	20/659	308/29008	2.96032e-05	0.00125978	0.00096196	Dusp10/Wnt5a/Ltb4r2/Egr3/Ptk2b/Rgcc/Ptp4a3/Acvrl1/Card10/Mcc/Mmp9/Pfn2/Tek/P2rx4/Tgfbr3/Plxnd1/Prkd2/Adam8/Hmox1/Ctsh	20
GO:0002474	BP	GO:0002474	antigen processing and presentation of peptide antigen via MHC class I	8/659	55/29008	3.22982e-05	0.0013313	0.00101657	Mr1/Tapbp/Tap1/Tap2/H2-K1/H2-T24/H2-T23/H2-T22	8
GO:0032371	BP	GO:0032371	regulation of sterol transport	9/659	71/29008	3.23974e-05	0.0013313	0.00101657	Lrp1/Abca8b/Abca8a/Nfkbia/Abca3/Abcg1/Nr1h3/Pltp/Abca1	9
GO:0032374	BP	GO:0032374	regulation of cholesterol transport	9/659	71/29008	3.23974e-05	0.0013313	0.00101657	Lrp1/Abca8b/Abca8a/Nfkbia/Abca3/Abcg1/Nr1h3/Pltp/Abca1	9
GO:0090130	BP	GO:0090130	tissue migration	20/659	310/29008	3.24424e-05	0.0013313	0.00101657	Dusp10/Wnt5a/Ltb4r2/Egr3/Ptk2b/Rgcc/Ptp4a3/Acvrl1/Card10/Mcc/Mmp9/Pfn2/Tek/P2rx4/Tgfbr3/Plxnd1/Prkd2/Adam8/Hmox1/Ctsh	20
GO:0106106	BP	GO:0106106	cold-induced thermogenesis	13/659	147/29008	3.28518e-05	0.00133617	0.00102029	Per2/Thra/Nr1d1/Tshr/Lpin1/Npr3/Bscl2/Nr1h3/Acot11/Gpr3/Arntl/Il4ra/Zfp423	13
GO:0043547	BP	GO:0043547	positive regulation of GTPase activity	17/659	237/29008	3.35042e-05	0.00135075	0.00103142	Ccl2/Ccl7/Sgsm2/Arhgap27/Wnt5a/Ptk2b/Tbc1d12/Garnl3/Tbc1d2/Fzd10/Arap2/Rgma/Wnt11/Arap1/Gmip/Icam1/Arhgap6	17
GO:0002483	BP	GO:0002483	antigen processing and presentation of endogenous peptide antigen	7/659	41/29008	3.47486e-05	0.00137676	0.00105129	Tapbp/Tap1/Tap2/H2-K1/H2-T24/H2-T23/H2-T22	7
GO:0019885	BP	GO:0019885	antigen processing and presentation of endogenous peptide antigen via MHC class I	7/659	41/29008	3.47486e-05	0.00137676	0.00105129	Tapbp/Tap1/Tap2/H2-K1/H2-T24/H2-T23/H2-T22	7
GO:0001503	BP	GO:0001503	ossification	24/659	417/29008	3.54934e-05	0.00138358	0.00105649	Dnm3os/Ccn2/Fstl3/Thra/Axin2/Wnt5a/Mmp14/Ptk2b/Runx1/Crim1/Smad7/Bmp2/Mmp9/Ecm1/Rflna/Tgfbr3/Calcr/Alox5/Wnt11/Dchs1/Ifitm3/Mmp2/Wwox/Smpd3	24
GO:0060326	BP	GO:0060326	cell chemotaxis	20/659	312/29008	3.55226e-05	0.00138358	0.00105649	Ccl2/Ccl7/Cxcl16/Pgf/Cxcl14/Wnt5a/Egr3/Ptk2b/Gpsm3/Eng/Padi2/Cxcl5/P2rx4/Cxcl12/Alox5/Prkd2/Hsd3b7/Adam8/Dpep1/Dapk2	20
GO:0051017	BP	GO:0051017	actin filament bundle assembly	14/659	172/29008	4.16933e-05	0.00161027	0.00122959	Ccn2/Gas7/Ptk2b/Rgcc/Triobp/Itgb5/Kank3/Pfn2/Synpo2/Espn/Wnt11/Arap1/Bbs4/Arhgap6	14
GO:0002833	BP	GO:0002833	positive regulation of response to biotic stimulus	14/659	173/29008	4.4435e-05	0.00170186	0.00129953	Ikbke/Mr1/Igtp/Lgals9/Pomc/Wnt5a/Nmi/Ereg/Trim12a/Trim12c/Adam8/Mmp2/Cyba/Ulbp1	14
GO:0034612	BP	GO:0034612	response to tumor necrosis factor	15/659	196/29008	4.58782e-05	0.00174231	0.00133041	Pid1/Ccl2/Ccl7/Sphk1/Cxcl16/Nr1d1/Wdr35/Nfkbia/Ptk2b/Cd14/Traf1/Gba/Smpd3/Rora/Birc3	15
GO:0001837	BP	GO:0001837	epithelial to mesenchymal transition	13/659	152/29008	4.66283e-05	0.00174231	0.00133041	Axin2/Rian/Il17rd/Wnt5a/Rgcc/Ldlrad4/Smad7/Pdcd4/Eng/Bmp2/Pdpn/Tgfbr3/Wnt11	13
GO:0051092	BP	GO:0051092	positive regulation of NF-kappaB transcription factor activity	13/659	152/29008	4.66283e-05	0.00174231	0.00133041	Irak3/Sphk1/Wnt5a/Traf1/Tgfbr3/Nod1/Prkd2/Prkcb/Trim12a/Trim12c/Adam8/Icam1/Ikbkg	13
GO:0015872	BP	GO:0015872	dopamine transport	8/659	58/29008	4.78976e-05	0.0017753	0.00135561	Sncg/Gdnf/Syt13/Chrnb2/Cxcl12/Prkcb/Syt17/Smpd3	8
GO:0019883	BP	GO:0019883	antigen processing and presentation of endogenous antigen	7/659	44/29008	5.58383e-05	0.0020097	0.00153459	Tapbp/Tap1/Tap2/H2-K1/H2-T24/H2-T23/H2-T22	7
GO:0050919	BP	GO:0050919	negative chemotaxis	7/659	44/29008	5.58383e-05	0.0020097	0.00153459	Wnt5a/Lrtm1/Sema4g/Sema4f/Sema4b/Nrg1/Robo3	7
GO:0002704	BP	GO:0002704	negative regulation of leukocyte mediated immunity	9/659	76/29008	5.60449e-05	0.0020097	0.00153459	Cd55/Lgals9/Tap1/Tap2/Gfer/Smad7/Clec2d/Hmox1/Il20rb	9
GO:2001233	BP	GO:2001233	regulation of apoptotic signaling pathway	23/659	402/29008	5.61496e-05	0.0020097	0.00153459	Psen2/Atf3/Tnfaip3/Camk2b/Bdkrb2/Dapk1/Gdnf/Zfp385a/Nme5/Fas/Bdnf/Mmp9/Traf1/Trp53inp1/Cxcl12/Tnfrsf23/Hmox1/Wwox/Nrg1/Icam1/Dapk2/Ctsh/Ikbkg	23
GO:0050866	BP	GO:0050866	negative regulation of cell activation	16/659	223/29008	5.64081e-05	0.0020097	0.00153459	Serpine2/Tnfaip3/Lgals9/Nr1d1/Rian/Cd80/Runx1/Smad7/Fas/Nr1h3/Ptpn22/Pag1/Gpnmb/Il4ra/Hmox1/Il20rb	16
GO:0010976	BP	GO:0010976	positive regulation of neuron projection development	16/659	224/29008	5.94956e-05	0.0021034	0.00160614	Serpine2/Ahi1/Lrp1/Lif/Sphk1/Camk2b/Wnt5a/Ptk2b/Bdnf/Serpini1/Cxcl5/Rgma/Scn1b/Cpeb1/Nrg1/Fez1	16
GO:0031349	BP	GO:0031349	positive regulation of defense response	18/659	273/29008	6.00253e-05	0.00210592	0.00160807	Ikbke/Igtp/Lgals9/Pomc/Nfkbia/Wnt5a/Gpsm3/Pdcd4/Nmi/Penk/Ereg/Nod1/Trim12a/Trim12c/Adam8/Mmp2/Cyba/Ulbp1	18
GO:0032770	BP	GO:0032770	positive regulation of monooxygenase activity	6/659	31/29008	6.09509e-05	0.0021222	0.0016205	Esr1/Ptk2b/Gdnf/Npr3/S100a1/Nod1	6
GO:0008360	BP	GO:0008360	regulation of cell shape	13/659	157/29008	6.51824e-05	0.00225247	0.00171997	Gas7/Ccl2/Ccl7/Rac3/Ptk2b/Brwd1/Myl12b/S100a13/Pdpn/Plxnd1/Arap1/Cdc42ep5/Icam1	13
GO:0030595	BP	GO:0030595	leukocyte chemotaxis	16/659	226/29008	6.61197e-05	0.00226781	0.00173168	Ccl2/Ccl7/Cxcl16/Pgf/Cxcl14/Wnt5a/Ptk2b/Gpsm3/Padi2/Cxcl5/Cxcl12/Alox5/Hsd3b7/Adam8/Dpep1/Dapk2	16
GO:0006979	BP	GO:0006979	response to oxidative stress	23/659	407/29008	6.76917e-05	0.00230452	0.00175972	Aifm2/Tnfaip3/Egfr/Gpx3/Sphk1/Dapk1/Gpx8/Ptk2b/Mapk13/Gfer/Nme5/Mmp9/Pla2r1/Slc4a11/Trp53inp1/Sod3/Alox5/Pde8a/Arntl/Cln8/Hmox1/Mmp2/Smpd3	23
GO:0048002	BP	GO:0048002	antigen processing and presentation of peptide antigen	9/659	78/29008	6.89135e-05	0.00231851	0.0017704	Mr1/Tapbp/Tap1/Tap2/H2-K1/H2-T24/H2-T23/H2-T22/Unc93b1	9
GO:0031663	BP	GO:0031663	lipopolysaccharide-mediated signaling pathway	8/659	61/29008	6.93218e-05	0.00231851	0.0017704	Cd55/Tnfaip3/Ccl2/Nfkbia/Cd14/Ptpn22/Trim12a/Trim12c	8
GO:0051000	BP	GO:0051000	positive regulation of nitric-oxide synthase activity	5/659	20/29008	6.96159e-05	0.00231851	0.0017704	Esr1/Ptk2b/Npr3/S100a1/Nod1	5
GO:0007249	BP	GO:0007249	I-kappaB kinase/NF-kappaB signaling	16/659	228/29008	7.33832e-05	0.00239257	0.00182695	Esr1/Tnfaip3/Nr1d1/Nfkbia/Wnt5a/Lime1/Traf1/S100a13/Nod1/Otud7a/Prkcb/Relb/Trim12a/Trim12c/Rora/Ikbkg	16
GO:0002063	BP	GO:0002063	chondrocyte development	6/659	32/29008	7.35831e-05	0.00239257	0.00182695	Axin2/Smad7/Sulf2/Ecm1/Rflna/Smpd3	6
GO:1902042	BP	GO:1902042	negative regulation of extrinsic apoptotic signaling pathway via death domain receptors	6/659	32/29008	7.35831e-05	0.00239257	0.00182695	Psen2/Tnfaip3/Dapk1/Tnfrsf23/Hmox1/Icam1	6
GO:0010876	BP	GO:0010876	lipid localization	24/659	437/29008	7.3922e-05	0.00239257	0.00182695	Ikbke/Lrp1/Selenom/Abca8b/Abca8a/Pomc/Bdkrb2/Nfkbia/Tmem30b/Fitm1/Runx1/Abca3/Abcg1/Bscl2/Pla2r1/Nr1h3/Ano3/Pltp/Gba/Abca1/Plin2/Atp8a1/Nrg1/Slco2a1	24
GO:0022408	BP	GO:0022408	negative regulation of cell-cell adhesion	15/659	206/29008	8.08169e-05	0.00259744	0.00198339	Serpine2/Tnfaip3/Lgals9/Rgcc/Cd80/Runx1/Smad7/Bmp2/Ptpn22/Pag1/Gpnmb/Cxcl12/Il4ra/Adam8/Il20rb	15
GO:0032680	BP	GO:0032680	regulation of tumor necrosis factor production	14/659	183/29008	8.17915e-05	0.00261051	0.00199337	Cd34/Tnfaip3/Irak3/Ccl2/Lgals9/Pomc/Wnt5a/Zbtb20/Cd14/Ptpn22/Ddx58/Gpnmb/Nod1/Cyba	14
GO:0033002	BP	GO:0033002	muscle cell proliferation	17/659	255/29008	8.33321e-05	0.00262325	0.00200309	Esr1/Tnfaip3/Ogn/Npr3/Pim1/Pdcd4/Bmp2/Mmp9/Il6ra/Ereg/Tgfbr3/Hmox1/Mmp2/Nrg1/Smpd3/Cyba/Ncam1	17
GO:1901215	BP	GO:1901215	negative regulation of neuron death	17/659	255/29008	8.33321e-05	0.00262325	0.00200309	Pm20d1/Cd34/Esr1/Lrp1/Cpeb4/Ccl2/Sncg/Ptk2b/Gdnf/Syngap1/Gfer/Bdnf/Gba/Cntfr/Gpnmb/Adam8/Hmox1	17
GO:1903037	BP	GO:1903037	regulation of leukocyte cell-cell adhesion	20/659	333/29008	8.75411e-05	0.00268449	0.00204986	Dusp10/Cd55/Ccl2/Lgals9/Sox4/Egr3/Cd80/Runx1/Smad7/Cd59a/Ptpn22/Pag1/Gpnmb/Cxcl12/Alox5/Il4ra/Adam8/Icam1/Fut4/Il20rb	20
GO:0002707	BP	GO:0002707	negative regulation of lymphocyte mediated immunity	8/659	63/29008	8.76139e-05	0.00268449	0.00204986	Cd55/Lgals9/Tap1/Tap2/Gfer/Smad7/Clec2d/Il20rb	8
GO:0060393	BP	GO:0060393	regulation of pathway-restricted SMAD protein phosphorylation	8/659	63/29008	8.76139e-05	0.00268449	0.00204986	Lrp1/Lgals9/Acvrl1/Ldlrad4/Smad7/Eng/Bmp2/Pmepa1	8
GO:0072678	BP	GO:0072678	T cell migration	8/659	63/29008	8.76139e-05	0.00268449	0.00204986	Ccl2/Cxcl16/Lgals9/Wnt5a/Ecm1/Cxcl12/Adam8/Icam1	8
GO:0032496	BP	GO:0032496	response to lipopolysaccharide	22/659	388/29008	9.21549e-05	0.00280493	0.00214182	Dusp10/Cd55/Tnfaip3/Irak3/Igtp/Shpk/Ccl2/Cxcl16/Lgals9/Nr1d1/Nfkbia/Cd80/Cd14/Pdcd4/Nr1h3/Ptpn22/Abca1/Cxcl5/Adm/Trim12a/Trim12c/Mapkapk3	22
GO:0045824	BP	GO:0045824	negative regulation of innate immune response	9/659	81/29008	9.28206e-05	0.0028066	0.0021431	Dusp10/Tnfaip3/Irak3/Lgals9/Tap1/Tap2/Gfer/Nmi/Clec2d	9
GO:0003007	BP	GO:0003007	heart morphogenesis	18/659	284/29008	9.93351e-05	0.00297085	0.00226852	Ahi1/Axin2/Sox4/Wnt5a/Acvrl1/Pim1/Smad7/Pdcd4/Eng/Bmp2/Tek/Tgfbr3/Plxnd1/Ppp1r13l/Wnt11/Dchs1/Nrg1/Aldh1a2	18
GO:0003018	BP	GO:0003018	vascular process in circulatory system	16/659	234/29008	9.95455e-05	0.00297085	0.00226852	Per2/Lrp1/Wdr35/Bdkrb2/Ptp4a3/Npr3/Fgfbp3/Smtnl1/Sod3/P2rx4/Tgfbr3/Alox5/Adm/Mmp2/Smpd3/Icam1	16
GO:0017015	BP	GO:0017015	regulation of transforming growth factor beta receptor signaling pathway	11/659	121/29008	0.00010207	0.00300659	0.00229581	Lrp1/Il17rd/Wfikkn1/Ldlrad4/Smad7/Eng/Bmp2/Pmepa1/Htra3/Tgfbr3/Htra1	11
GO:0008625	BP	GO:0008625	extrinsic apoptotic signaling pathway via death domain receptors	9/659	82/29008	0.000102192	0.00300659	0.00229581	Psen2/Atf3/Tnfaip3/Dapk1/Fas/Tnfrsf26/Tnfrsf23/Hmox1/Icam1	9
GO:0042116	BP	GO:0042116	macrophage activation	10/659	101/29008	0.000102705	0.00300659	0.00229581	Shpk/Sphk1/Lgals9/Nr1d1/Wnt5a/Nmi/Nr1h3/Il4ra/Rora/Ulbp1	10
GO:0048010	BP	GO:0048010	vascular endothelial growth factor receptor signaling pathway	7/659	49/29008	0.00011347	0.00330069	0.00252038	Ccl2/Pgf/Ptk2b/Cd59a/Tek/Prkd2/Prkcb	7
GO:0060562	BP	GO:0060562	epithelial tube morphogenesis	22/659	394/29008	0.000114923	0.00332192	0.00253659	Ahi1/Esr1/Pgf/Sox4/Wnt5a/Mmp14/Gdnf/Acvrl1/Prickle1/Eng/Bmp2/Tek/Mthfr/Cxcl12/Plxnd1/Rgma/Adm/Dchs1/Aldh1a2/Ctsh/St14/Bbs4	22
GO:0061448	BP	GO:0061448	connective tissue development	18/659	288/29008	0.000118448	0.00340242	0.00259807	Ccn2/Selenom/Thra/Axin2/Wnt5a/Runx1/Smad7/Plaat3/Bscl2/Bmp2/Sulf2/Il6ra/Ecm1/Rflna/Creb5/Smpd3/Bbs4/Bgn	18
GO:0043254	BP	GO:0043254	regulation of protein-containing complex assembly	24/659	451/29008	0.000119688	0.00341668	0.00260895	Ikbke/Psen2/Esr1/Igtp/Thra/Ptk2b/Abca3/Kank3/Ldlrad4/Fas/Gsn/Mtln/Pmepa1/Gba/Psrc1/Pfn2/Abca1/Capg/Cdc42ep5/Svip/Nrg1/Icam1/Ncam1/Bbs4	24
GO:0043122	BP	GO:0043122	regulation of I-kappaB kinase/NF-kappaB signaling	14/659	190/29008	0.000122034	0.00344412	0.00262991	Esr1/Tnfaip3/Nr1d1/Wnt5a/Lime1/Traf1/S100a13/Nod1/Otud7a/Prkcb/Trim12a/Trim12c/Rora/Ikbkg	14
GO:0071248	BP	GO:0071248	cellular response to metal ion	13/659	167/29008	0.000122168	0.00344412	0.00262991	Slc40a1/Egfr/Fas/Gsn/Syt13/Mmp9/P2rx4/Rasa4/Syt17/Hmox1/Mt2/Smpd3/Trf	13
GO:0006809	BP	GO:0006809	nitric oxide biosynthetic process	9/659	84/29008	0.000123323	0.00344412	0.00262991	Cd34/Esr1/Wdr35/Ptk2b/P2rx4/Smpd3/Icam1/Rora/Ulbp1	9
GO:0002456	BP	GO:0002456	T cell mediated immunity	12/659	145/29008	0.000123962	0.00344412	0.00262991	Cd55/Mr1/Tap2/H2-K1/H2-T24/H2-T23/H2-T22/Rftn1/Smad7/Icam1/Ctsh/Il20rb	12
GO:0031342	BP	GO:0031342	negative regulation of cell killing	6/659	35/29008	0.000124396	0.00344412	0.00262991	Lgals9/Tap1/Tap2/Gfer/Cd59a/Clec2d	6
GO:1903844	BP	GO:1903844	regulation of cellular response to transforming growth factor beta stimulus	11/659	124/29008	0.000127182	0.00350016	0.0026727	Lrp1/Il17rd/Wfikkn1/Ldlrad4/Smad7/Eng/Bmp2/Pmepa1/Htra3/Tgfbr3/Htra1	11
GO:0010038	BP	GO:0010038	response to metal ion	18/659	292/29008	0.000140722	0.00384975	0.00293964	Slc30a1/Slc40a1/Egfr/Camk2b/Fas/Gsn/Syt13/Mmp9/Sod3/P2rx4/Rasa4/Apobec1/Syt17/Hmox1/Mt2/Smpd3/Ncam1/Trf	18
GO:0030522	BP	GO:0030522	intracellular receptor signaling pathway	15/659	217/29008	0.000144247	0.00392284	0.00299545	Esr1/Tnfaip3/Igtp/Thra/Nfkbia/Pim1/Bdnf/Bmp2/Ptpn22/Padi2/Ddx58/Clpb/Arntl/Rora/Aldh1a2	15
GO:1901224	BP	GO:1901224	positive regulation of NIK/NF-kappaB signaling	8/659	68/29008	0.000151412	0.00408643	0.00312037	Egfr/Sphk1/Ptp4a3/Cd14/Pdcd4/Nmi/Nod1/Smpd3	8
GO:0007626	BP	GO:0007626	locomotory behavior	17/659	268/29008	0.000152041	0.00408643	0.00312037	Cstb/Gng7/Npas3/Tshr/Atxn1/Sncg/Selenop/Zfp385a/Pak6/Chrnb2/Ciart/Penk/Espn/Cxcl12/Ccnd2/Cln8/Nrg1	17
GO:0035296	BP	GO:0035296	regulation of tube diameter	13/659	171/29008	0.000154828	0.00411324	0.00314084	Per2/Wdr35/Bdkrb2/Npr3/Smtnl1/Sod3/P2rx4/Tgfbr3/Alox5/Adm/Mmp2/Smpd3/Icam1	13
GO:0097746	BP	GO:0097746	blood vessel diameter maintenance	13/659	171/29008	0.000154828	0.00411324	0.00314084	Per2/Wdr35/Bdkrb2/Npr3/Smtnl1/Sod3/P2rx4/Tgfbr3/Alox5/Adm/Mmp2/Smpd3/Icam1	13
GO:0045927	BP	GO:0045927	positive regulation of growth	19/659	321/29008	0.000157296	0.0041548	0.00317257	Ahi1/Lrp1/Egfr/Sphk1/Cxcl16/Tshr/Mmp14/Ptk2b/Pim1/Rftn1/Smad7/Bdnf/Tgfbr3/Cxcl12/Syt17/Nrg1/Cyba/Ncam1/Bbs4	19
GO:0035150	BP	GO:0035150	regulation of tube size	13/659	172/29008	0.000164078	0.00430917	0.00329045	Per2/Wdr35/Bdkrb2/Npr3/Smtnl1/Sod3/P2rx4/Tgfbr3/Alox5/Adm/Mmp2/Smpd3/Icam1	13
GO:1902041	BP	GO:1902041	regulation of extrinsic apoptotic signaling pathway via death domain receptors	7/659	52/29008	0.000166632	0.00435137	0.00332267	Psen2/Atf3/Tnfaip3/Dapk1/Tnfrsf23/Hmox1/Icam1	7
GO:0071677	BP	GO:0071677	positive regulation of mononuclear cell migration	8/659	69/29008	0.000167903	0.0043598	0.00332911	Ccl2/Ccl7/Lgals9/Cxcl14/Wnt5a/Ptk2b/Cxcl12/Adam8	8
GO:0045953	BP	GO:0045953	negative regulation of natural killer cell mediated cytotoxicity	5/659	24/29008	0.000177025	0.00457082	0.00349025	Lgals9/Tap1/Tap2/Gfer/Clec2d	5
GO:0019216	BP	GO:0019216	regulation of lipid metabolic process	21/659	379/29008	0.000181102	0.00464997	0.00355068	Esr1/Thra/Sphk1/Nr1d1/Lpin1/Ptk2b/Zbtb20/Abca3/Abcg1/Pcx/Bscl2/Bmp2/Nr1h3/Mtln/Tek/Crebl2/Apobec1/Smpd3/Rora/Bbs4/Lactb	21
GO:0071356	BP	GO:0071356	cellular response to tumor necrosis factor	13/659	174/29008	0.000184011	0.00469841	0.00358768	Pid1/Ccl2/Ccl7/Sphk1/Nr1d1/Wdr35/Nfkbia/Ptk2b/Traf1/Gba/Smpd3/Rora/Birc3	13
GO:0007623	BP	GO:0007623	circadian rhythm	15/659	222/29008	0.00018513	0.00470086	0.00358954	Per2/Nr1d1/Fas/Bdnf/Gpr176/Chrnb2/Ciart/Per3/Bhlhe40/Arntl2/Prokr1/Dbp/Arntl/Relb/Rora	15
GO:0001912	BP	GO:0001912	positive regulation of leukocyte mediated cytotoxicity	9/659	89/29008	0.000192615	0.00483747	0.00369386	Mr1/Ccl2/Pomc/Tap2/H2-K1/H2-T24/H2-T23/H2-T22/Ulbp1	9
GO:0046209	BP	GO:0046209	nitric oxide metabolic process	9/659	89/29008	0.000192615	0.00483747	0.00369386	Cd34/Esr1/Wdr35/Ptk2b/P2rx4/Smpd3/Icam1/Rora/Ulbp1	9
GO:0032755	BP	GO:0032755	positive regulation of interleukin-6 production	10/659	109/29008	0.000193865	0.00484242	0.00369764	Lgals9/Wnt5a/Zbtb20/Mapk13/Unc93b1/Il6ra/Ddx58/Ereg/Nod1/Cyba	10
GO:0032922	BP	GO:0032922	circadian regulation of gene expression	8/659	71/29008	0.000205329	0.00508547	0.00388323	Per2/Nr1d1/Ciart/Per3/Bhlhe40/Arntl/Relb/Rora	8
GO:0006631	BP	GO:0006631	fatty acid metabolic process	23/659	439/29008	0.000206194	0.00508547	0.00388323	Ankrd23/Per2/Ephx1/Sphk1/Ltc4s/Acot4/Lpin1/Echdc3/Nr1h3/Mtln/Bdh2/Slc27a3/Cyp2u1/Acot11/Pdpn/Alox5/Lipe/Cpt1c/Ces2c/Ces2e/Ces2f/Ces2g/Acsbg1	23
GO:0045089	BP	GO:0045089	positive regulation of innate immune response	11/659	131/29008	0.000206915	0.00508547	0.00388323	Ikbke/Igtp/Lgals9/Wnt5a/Nmi/Ereg/Trim12a/Trim12c/Adam8/Mmp2/Ulbp1	11
GO:0002695	BP	GO:0002695	negative regulation of leukocyte activation	14/659	200/29008	0.000208736	0.00510292	0.00389656	Tnfaip3/Lgals9/Nr1d1/Cd80/Runx1/Smad7/Fas/Nr1h3/Ptpn22/Pag1/Gpnmb/Il4ra/Hmox1/Il20rb	14
GO:0002716	BP	GO:0002716	negative regulation of natural killer cell mediated immunity	5/659	25/29008	0.000217165	0.00522561	0.00399024	Lgals9/Tap1/Tap2/Gfer/Clec2d	5
GO:0034138	BP	GO:0034138	toll-like receptor 3 signaling pathway	5/659	25/29008	0.000217165	0.00522561	0.00399024	Tnfaip3/Lgals9/Rftn1/Unc93b1/Ptpn22	5
GO:0045737	BP	GO:0045737	positive regulation of cyclin-dependent protein serine/threonine kinase activity	5/659	25/29008	0.000217165	0.00522561	0.00399024	Egfr/Rgcc/Pim1/Psrc1/Ccnd2	5
GO:2001057	BP	GO:2001057	reactive nitrogen species metabolic process	9/659	91/29008	0.000228176	0.00546195	0.00417071	Cd34/Esr1/Wdr35/Ptk2b/P2rx4/Smpd3/Icam1/Rora/Ulbp1	9
GO:0048660	BP	GO:0048660	regulation of smooth muscle cell proliferation	13/659	178/29008	0.000230175	0.00548126	0.00418545	Esr1/Tnfaip3/Ogn/Npr3/Pdcd4/Bmp2/Mmp9/Il6ra/Ereg/Hmox1/Mmp2/Smpd3/Cyba	13
GO:1904035	BP	GO:1904035	regulation of epithelial cell apoptotic process	9/659	92/29008	0.000247902	0.00587297	0.00448456	Tnfaip3/Ccl2/Rgcc/Pdcd4/Gsn/Pla2r1/Tek/Hmox1/Icam1	9
GO:0050920	BP	GO:0050920	regulation of chemotaxis	15/659	229/29008	0.000259025	0.00607544	0.00463916	Ccl2/Ccl7/Pgf/Cxcl14/Wnt5a/Ptk2b/Gpsm3/Sema4g/Padi2/P2rx4/Cxcl12/Sema4f/Prkd2/Sema4b/Dapk2	15
GO:0048511	BP	GO:0048511	rhythmic process	18/659	307/29008	0.000260353	0.00607544	0.00463916	Per2/Esr1/Nr1d1/Runx1/Fas/Bdnf/Gpr176/Chrnb2/Ciart/Per3/Ereg/Bhlhe40/Arntl2/Prokr1/Dbp/Arntl/Relb/Rora	18
GO:0038127	BP	GO:0038127	ERBB signaling pathway	10/659	113/29008	0.000260414	0.00607544	0.00463916	Psen2/Esr1/Egfr/Ptk2b/Afap1l2/Mmp9/Ptprf/Ereg/Mvp/Nrg1	10
GO:0071276	BP	GO:0071276	cellular response to cadmium ion	5/659	26/29008	0.000263873	0.00612506	0.00467705	Egfr/Gsn/Mmp9/Hmox1/Mt2	5
GO:0007411	BP	GO:0007411	axon guidance	16/659	255/29008	0.000266002	0.0061399	0.00468838	Lrp1/Nrcam/Wnt5a/Lrtm1/Gdnf/Sema4g/Ablim1/Bdnf/Efna3/Cxcl12/Sema4f/Plxnd1/Sema4b/Scn1b/Robo3/Ncam1	16
GO:0019884	BP	GO:0019884	antigen processing and presentation of exogenous antigen	6/659	40/29008	0.000267184	0.0061399	0.00468838	Mr1/Tapbp/Tap1/Tap2/H2-K1/Unc93b1	6
GO:0010717	BP	GO:0010717	regulation of epithelial to mesenchymal transition	9/659	93/29008	0.000269021	0.00615135	0.00469713	Axin2/Il17rd/Rgcc/Ldlrad4/Smad7/Eng/Bmp2/Pdpn/Tgfbr3	9
[truncated: 84 more rows]
