# Supplementary material for: Nuclear m6A Reader YTHDC1 Promotes Muscle Stem Cell Activation/Proliferation by Regulating mRNA Splicing and Nuclear Export
Source: bioRxiv preprint, doi:10.1101/2022.08.07.503064, version 1 (2022-08-07)
Supplement: suppl table S2 [file 503064_file07.xlsx]

## Sheet: ASC peaks
Supplementary Table S2. LACE-seq profiling of YTHDC1 binding in ASC and C2C12 myoblasts.
All YTHDC1 binding sites in ASC 48h.
Chromosome	Begin	End	Strand	P-value
chr1	4774740	4774760	+	0.000166722
chr1	7090180	7090200	+	1.70193e-05
chr1	7769680	7769720	+	0.000166722
chr1	7770460	7770480	+	1.70193e-05
chr1	9459520	9459540	+	0.000166722
chr1	16057840	16057860	+	8.78392e-08
chr1	21692140	21692160	+	1.38243e-06
chr1	28395780	28395800	+	0.000166722
chr1	29799820	29799840	+	1.38243e-06
chr1	34038260	34038280	+	0.000166722
chr1	34491660	34491720	+	4.65608e-07
chr1	36844960	36844980	+	1.38243e-06
chr1	38733440	38733460	+	0.000166722
chr1	44000380	44000400	+	8.78392e-08
chr1	48519080	48519120	+	8.34048e-05
chr1	54305940	54305960	+	1.70193e-05
chr1	57071000	57071020	+	1.70193e-05
chr1	57280380	57280400	+	7.19457e-09
chr1	58293060	58293080	+	1.38243e-06
chr1	59653480	59653500	+	1.38243e-06
chr1	60902480	60902500	+	9.42825e-09
chr1	63150780	63150800	+	0.000166722
chr1	63238620	63238640	+	1.70193e-05
chr1	64910400	64910420	+	9.42825e-09
chr1	71916680	71916700	+	1.38243e-06
chr1	71959100	71959120	+	0.000166722
chr1	72215060	72215080	+	9.42825e-09
chr1	74061520	74061540	+	1.70193e-05
chr1	74298900	74298920	+	0.000166722
chr1	74863320	74863380	+	5.6064e-05
chr1	75271660	75271680	+	1.70193e-05
chr1	75435740	75435760	+	1.38243e-06
chr1	79629020	79629040	+	0.000166722
chr1	81961940	81961960	+	1.70193e-05
chr1	84816440	84816460	+	9.42825e-09
chr1	87473140	87473160	+	1.70193e-05
chr1	88130100	88130120	+	1.70193e-05
chr1	88973880	88973900	+	0.000166722
chr1	89317720	89317740	+	1.70193e-05
chr1	97010080	97010100	+	7.19457e-09
chr1	97728720	97728740	+	8.78392e-08
chr1	110750540	110750560	+	8.78392e-08
chr1	112387620	112387640	+	1.38243e-06
chr1	120551600	120551620	+	1.70193e-05
chr1	120844240	120844260	+	0.000166722
chr1	134677000	134677020	+	1.70193e-05
chr1	134930900	134930960	+	5.55794e-05
chr1	136649560	136649580	+	1.70193e-05
chr1	143965240	143965260	+	9.42825e-09
chr1	145404800	145404820	+	1.70193e-05
chr1	149529680	149529700	+	8.78392e-08
chr1	152909160	152909180	+	1.38243e-06
chr1	153505500	153505520	+	9.42825e-09
chr1	159015020	159015040	+	9.42825e-09
chr1	165926780	165926800	+	1.38243e-06
chr1	166375340	166375360	+	0.000166722
chr1	166384580	166384600	+	0.000166722
chr1	166414480	166414500	+	7.19457e-09
chr1	167082060	167082080	+	0.000166722
chr1	167572400	167572460	+	3.40761e-08
chr1	169198280	169198300	+	0.000166722
chr1	169270500	169270520	+	7.19457e-09
chr1	171729580	171729600	+	0.000166722
chr1	172964080	172964120	+	4.75169e-08
chr1	172967180	172967220	+	4.75169e-08
chr1	172968140	172968180	+	7.19457e-09
chr1	172994300	172994360	+	4.65608e-07
chr1	172994840	172994880	+	7.19457e-09
chr1	172995500	172995540	+	7.19457e-09
chr1	173001920	173001980	+	7.93913e-09
chr1	173002480	173002520	+	7.19457e-09
chr1	173003140	173003180	+	7.19457e-09
chr1	173009540	173009600	+	7.93913e-09
chr1	173010080	173010140	+	5.67789e-06
chr1	173010760	173010800	+	6.94814e-07
chr1	173031980	173032040	+	7.19457e-09
chr1	173433220	173433280	+	5.55802e-05
chr1	175374120	175374140	+	0.000166722
chr1	179958160	179958180	+	0.000166722
chr1	180297660	180297680	+	8.78392e-08
chr1	180444320	180444340	+	0.000166722
chr1	180885900	180885920	+	1.70193e-05
chr1	181131120	181131140	+	1.70193e-05
chr1	183219480	183219500	+	9.42825e-09
chr1	183950240	183950260	+	1.38243e-06
chr1	186509240	186509260	+	1.70193e-05
chr1	186617200	186617220	+	0.000166722
chr1	190801400	190801420	+	0.000166722
chr1	191010840	191010860	+	1.38243e-06
chr1	191666820	191666840	+	8.78392e-08
chr1	191853680	191853700	+	8.78392e-08
chr1	192306840	192306880	+	8.51324e-06
chr1	192306920	192306980	+	5.56063e-05
chr1	192728840	192728860	+	0.000166722
chr1	194484360	194484380	+	1.70193e-05
chr1	195079400	195079420	+	9.42825e-09
chr10	5130300	5130320	+	8.78392e-08
chr10	5965120	5965140	+	0.000166722
chr10	6220320	6220360	+	8.55356e-06
chr10	11211880	11211900	+	1.70193e-05
chr10	12254380	12254400	+	8.78392e-08
chr10	12642360	12642400	+	8.33644e-05
chr10	12860000	12860020	+	0.000166722
chr10	13989900	13989920	+	0.000166722
chr10	14337680	14337700	+	9.42825e-09
chr10	17815240	17815260	+	1.70193e-05
chr10	18151160	18151180	+	0.000166722
chr10	23505560	23505600	+	1.70193e-05
chr10	25174780	25174800	+	8.78392e-08
chr10	29254720	29254740	+	1.38243e-06
chr10	30240020	30240040	+	7.19457e-09
chr10	30662180	30662200	+	1.38243e-06
chr10	36632360	36632380	+	8.78392e-08
chr10	37013720	37013740	+	1.38243e-06
chr10	39891280	39891300	+	0.000166722
chr10	40206460	40206480	+	0.000166722
chr10	44160180	44160200	+	7.19457e-09
chr10	53264820	53264840	+	8.78392e-08
chr10	58563180	58563200	+	0.000166722
chr10	58762660	58762680	+	1.38243e-06
chr10	59291880	59291900	+	7.19457e-09
chr10	59440180	59440220	+	8.33644e-05
chr10	60522100	60522120	+	7.19457e-09
chr10	60861900	60861920	+	0.000166722
chr10	62354860	62354900	+	8.51435e-06
chr10	62892200	62892300	+	3.145e-07
chr10	64515520	64515540	+	0.000166722
chr10	66261400	66261420	+	7.19457e-09
chr10	69870140	69870160	+	1.38243e-06
chr10	74592920	74592940	+	7.19457e-09
chr10	79938000	79938020	+	9.42825e-09
chr10	80131540	80131560	+	1.70193e-05
chr10	80333820	80333840	+	0.000166722
chr10	85551900	85551920	+	1.38243e-06
chr10	89310140	89310160	+	8.78392e-08
chr10	90059760	90059780	+	8.78392e-08
chr10	90644840	90644900	+	3.40761e-08
chr10	92915740	92915780	+	7.19457e-09
chr10	93961500	93961520	+	1.70193e-05
chr10	93984860	93984880	+	0.000166722
chr10	94959620	94959640	+	7.19457e-09
chr10	95027020	95027040	+	1.70193e-05
chr10	95288700	95288720	+	0.000166722
chr10	95540160	95540180	+	0.000166722
chr10	95540260	95540280	+	0.000166722
chr10	95540480	95540500	+	7.19457e-09
chr10	98525040	98525060	+	1.70193e-05
chr10	99499760	99499780	+	7.19457e-09
chr10	101823080	101823100	+	7.19457e-09
chr10	102792520	102792540	+	0.000166722
chr10	110543340	110543360	+	7.19457e-09
chr10	117099360	117099380	+	0.000166722
chr10	119416920	119416940	+	1.38243e-06
chr10	120369840	120369860	+	1.70193e-05
chr10	122241020	122241040	+	8.78392e-08
chr10	122303720	122303760	+	8.31141e-09
chr10	127895520	127895580	+	7.19457e-09
chr10	127985300	127985320	+	9.42825e-09
chr10	128138740	128138760	+	7.19457e-09
chr11	5636080	5636100	+	0.000166722
chr11	9869140	9869160	+	1.70193e-05
chr11	17826220	17826240	+	0.000166722
chr11	18968340	18968360	+	1.38243e-06
chr11	20561420	20561440	+	0.000166722
chr11	20988460	20988480	+	0.000166722
chr11	24646000	24646020	+	0.000166722
chr11	33655060	33655080	+	7.19457e-09
chr11	37083320	37083340	+	1.70193e-05
chr11	42550800	42550820	+	1.70193e-05
chr11	42853080	42853100	+	0.000166722
chr11	44341160	44341180	+	1.70193e-05
chr11	48647400	48647440	+	8.51324e-06
chr11	48647940	48647980	+	7.19457e-09
chr11	48670480	48670540	+	4.65608e-07
chr11	51551300	51551320	+	0.000166722
chr11	52891060	52891080	+	1.38243e-06
chr11	54845700	54845720	+	0.000166722
chr11	58115680	58115700	+	7.19457e-09
chr11	58115720	58115740	+	7.19457e-09
chr11	58115980	58116060	+	4.17261e-05
chr11	59350020	59350040	+	1.70193e-05
chr11	61382480	61382500	+	0.000166722
chr11	64864640	64864660	+	7.19457e-09
chr11	65849100	65849120	+	0.000166722
chr11	65921560	65921600	+	0.000166722
chr11	67177880	67177900	+	1.70193e-05
chr11	68854780	68854840	+	5.67789e-06
chr11	68875820	68875880	+	7.19457e-09
chr11	68876540	68876560	+	7.19457e-09
chr11	68932300	68932340	+	8.33644e-05
chr11	68936980	68937000	+	7.19457e-09
chr11	68938120	68938160	+	7.19457e-09
chr11	68938680	68938700	+	0.000166722
chr11	68938720	68938740	+	7.19457e-09
chr11	69355860	69355880	+	1.70193e-05
chr11	75976560	75976580	+	8.78392e-08
chr11	77501380	77501400	+	1.38243e-06
chr11	77553000	77553040	+	6.95931e-07
chr11	81393240	81393260	+	1.38243e-06
chr11	82679640	82679660	+	0.000166722
chr11	83324780	83324800	+	8.78392e-08
chr11	83627640	83627660	+	0.000166722
chr11	87258000	87258020	+	1.70193e-05
chr11	88194920	88194940	+	7.19457e-09
chr11	88675980	88676000	+	1.70193e-05
chr11	94286320	94286340	+	1.70193e-05
chr11	94436020	94436040	+	8.78392e-08
chr11	95720480	95720540	+	3.40761e-08
chr11	97563760	97563820	+	4.66352e-07
chr11	97976640	97976660	+	1.70193e-05
chr11	98691740	98691760	+	1.70193e-05
chr11	99067760	99067780	+	7.19457e-09
chr11	100932960	100932980	+	1.70193e-05
chr11	101507060	101507100	+	6.94814e-07
chr11	102925020	102925040	+	0.000166722
chr11	103934320	103934340	+	7.19457e-09
chr11	104946980	104947000	+	8.78392e-08
chr11	106320360	106320380	+	8.78392e-08
chr11	106583120	106583140	+	0.000166722
chr11	106716780	106716800	+	8.78392e-08
chr11	107655440	107655460	+	9.42825e-09
chr11	108483260	108483280	+	1.38243e-06
chr11	108873160	108873180	+	7.19457e-09
chr11	109435880	109435900	+	1.38243e-06
chr11	109944520	109944540	+	1.38243e-06
chr11	110302140	110302160	+	1.70193e-05
chr11	113069640	113069660	+	0.000166722
chr11	115274620	115274640	+	7.19457e-09
chr11	115902900	115902920	+	7.19457e-09
chr11	116673360	116673380	+	7.19457e-09
chr11	119353940	119353960	+	1.38243e-06
chr11	120269540	120269560	+	0.000166722
chr11	121203860	121203880	+	1.70193e-05
chr12	3608760	3608780	+	0.000166722
chr12	8007000	8007020	+	1.70193e-05
chr12	12929640	12929660	+	8.78392e-08
chr12	13170480	13170500	+	0.000166722
chr12	21224240	21224260	+	1.70193e-05
chr12	21401160	21401180	+	7.19457e-09
chr12	26714060	26714080	+	1.70193e-05
chr12	31031800	31031820	+	0.000166722
chr12	31943800	31943820	+	1.38243e-06
chr12	31943900	31943920	+	9.42825e-09
chr12	33039940	33039980	+	7.35137e-07
chr12	33377200	33377220	+	1.70193e-05
chr12	35841560	35841580	+	0.000166722
chr12	36756280	36756300	+	7.19457e-09
chr12	37728480	37728500	+	1.70193e-05
chr12	43516060	43516080	+	7.19457e-09
chr12	44046340	44046360	+	1.70193e-05
chr12	48525140	48525160	+	0.000166722
chr12	52499640	52499660	+	1.70193e-05
chr12	52695640	52695660	+	1.38243e-06
chr12	55705020	55705040	+	9.42825e-09
chr12	55820160	55820200	+	8.51435e-06
chr12	55820220	55820240	+	7.19457e-09
chr12	55820280	55820300	+	8.78392e-08
chr12	55835540	55835660	+	5.8644e-05
chr12	55839440	55839540	+	3.36413e-05
chr12	55839580	55839600	+	0.000166722
chr12	56477080	56477100	+	9.42825e-09
chr12	60384300	60384320	+	8.78392e-08
chr12	62296280	62296300	+	0.000166722
chr12	70230940	70230960	+	1.70193e-05
chr12	70462180	70462360	+	1.85405e-05
chr12	70462400	70462460	+	1.13486e-05
chr12	71331780	71331800	+	7.19457e-09
chr12	72070100	72070160	+	6.1363e-06
chr12	72368280	72368300	+	9.42825e-09
chr12	73836400	73836420	+	9.42825e-09
chr12	74640580	74640600	+	0.000166722
chr12	75198080	75198100	+	0.000166722
chr12	78062440	78062460	+	1.70193e-05
chr12	80098000	80098020	+	7.19457e-09
chr12	82954580	82954600	+	0.000166722
chr12	84181260	84181280	+	1.70193e-05
chr12	84185680	84185700	+	8.78392e-08
chr12	85455160	85455180	+	9.42825e-09
chr12	85560740	85560760	+	1.70193e-05
chr12	85962780	85962800	+	9.42825e-09
chr12	87246080	87246100	+	9.42825e-09
chr12	87553200	87553220	+	1.70193e-05
chr12	88381280	88381300	+	9.42825e-09
chr12	97494400	97494420	+	8.78392e-08
chr12	98299920	98299940	+	0.000166722
chr12	99948080	99948100	+	0.000166722
chr12	101268940	101268960	+	1.70193e-05
chr12	103491720	103491740	+	0.000166722
chr12	103521780	103521800	+	8.78392e-08
chr12	106941920	106941940	+	0.000166722
chr12	108905780	108905800	+	0.000166722
chr12	110115020	110115040	+	1.70193e-05
chr12	111605340	111605360	+	0.000166722
chr12	112235980	112236000	+	8.78392e-08
chr12	117715260	117715280	+	7.19457e-09
chr12	118379220	118379240	+	0.000166722
chr12	118469660	118469680	+	1.70193e-05
chr12	118611000	118611020	+	1.38243e-06
chr13	3857460	3857480	+	1.38243e-06
chr13	9833600	9833620	+	8.78392e-08
chr13	10053540	10053560	+	1.38243e-06
chr13	16132900	16132920	+	1.70193e-05
chr13	18307100	18307120	+	7.19457e-09
chr13	18361020	18361040	+	0.000166722
chr13	18919620	18919640	+	0.000166722
chr13	18989060	18989080	+	0.000166722
chr13	21252660	21252680	+	7.19457e-09
chr13	21259940	21260000	+	5.60371e-05
chr13	21264780	21264800	+	7.19457e-09
chr13	21307320	21307340	+	7.19457e-09
chr13	21584700	21584740	+	8.33656e-05
chr13	21856540	21856560	+	1.70193e-05
chr13	21875020	21875040	+	1.38243e-06
chr13	21924980	21925000	+	0.000166722
chr13	21947180	21947240	+	5.67789e-06
chr13	21973900	21973960	+	7.19457e-09
chr13	22016820	22016840	+	7.19457e-09
chr13	22023040	22023080	+	8.33644e-05
chr13	22025840	22025880	+	7.19457e-09
chr13	22027380	22027420	+	7.19457e-09
chr13	22028980	22029000	+	7.19457e-09
chr13	22032200	22032240	+	7.19457e-09
chr13	22032780	22032820	+	9.18705e-05
chr13	22086040	22086080	+	4.75169e-08
chr13	22088460	22088500	+	7.19457e-09
chr13	22107660	22107720	+	5.67789e-06
chr13	22113000	22113080	+	4.59394e-05
chr13	22142540	22142580	+	8.33644e-05
chr13	23400920	23400980	+	7.19457e-09
chr13	23492660	23492720	+	6.09576e-08
chr13	23492940	23493000	+	7.19457e-09
chr13	23504800	23504820	+	7.19457e-09
chr13	23504840	23504860	+	8.78392e-08
chr13	23505120	23505180	+	7.19457e-09
chr13	23517500	23517540	+	8.51324e-06
chr13	23518960	23518980	+	7.19457e-09
chr13	23524860	23524880	+	7.19457e-09
chr13	23528860	23528920	+	3.48207e-08
chr13	23529980	23530040	+	4.92489e-07
chr13	23538020	23538060	+	7.19457e-09
chr13	23538660	23538720	+	7.19457e-09
chr13	23545280	23545380	+	3.67686e-05
chr13	23592380	23592440	+	5.67789e-06
chr13	23618320	23618340	+	7.19457e-09
chr13	23622220	23622260	+	7.19457e-09
chr13	23643280	23643300	+	1.38243e-06
chr13	23654020	23654040	+	1.70193e-05
chr13	23837140	23837160	+	0.000166722
chr13	23854000	23854040	+	9.18705e-05
chr13	23895520	23895540	+	8.78392e-08
chr13	26239380	26239400	+	1.70193e-05
chr13	28240860	28240880	+	1.38243e-06
chr13	28490960	28490980	+	1.38243e-06
chr13	30034080	30034100	+	0.000166722
chr13	33093540	33093560	+	1.70193e-05
chr13	33545740	33545760	+	0.000166722
chr13	39050720	39050740	+	9.42825e-09
chr13	40386360	40386380	+	0.000166722
chr13	41583380	41583400	+	1.38243e-06
chr13	44965140	44965180	+	7.19457e-09
chr13	44965300	44965380	+	8.5138e-06
chr13	45479620	45479640	+	1.38243e-06
chr13	45493980	45494000	+	7.19457e-09
chr13	50246440	50246460	+	1.38243e-06
chr13	50814740	50814760	+	1.38243e-06
chr13	51451820	51451840	+	8.78392e-08
chr13	51731120	51731140	+	1.70193e-05
chr13	55459780	55459800	+	1.70193e-05
chr13	56321960	56321980	+	8.78392e-08
chr13	56395020	56395040	+	0.000166722
chr13	61428080	61428100	+	7.19457e-09
chr13	62346180	62346200	+	0.000166722
chr13	63051520	63051540	+	7.19457e-09
chr13	78183740	78183760	+	8.78392e-08
chr13	82081860	82081880	+	0.000166722
chr13	91654000	91654020	+	0.000166722
chr13	93677080	93677100	+	1.38243e-06
chr13	94384580	94384600	+	0.000166722
chr13	95825220	95825240	+	9.42825e-09
chr13	97964960	97964980	+	0.000166722
chr13	100738620	100738640	+	0.000166722
chr13	104660380	104660400	+	0.000166722
chr13	108988620	108988640	+	8.78392e-08
chr13	109004500	109004520	+	0.000166722
chr13	112383600	112383620	+	9.42825e-09
chr13	120226360	120226380	+	1.70193e-05
chr14	5712680	5712700	+	1.70193e-05
chr14	11045000	11045020	+	9.42825e-09
chr14	12352800	12352820	+	0.000166722
chr14	13174200	13174220	+	1.38243e-06
chr14	19473220	19473240	+	1.70193e-05
chr14	20884200	20884220	+	0.000166722
chr14	21799900	21799920	+	1.38243e-06
chr14	22154080	22154100	+	0.000166722
chr14	23570540	23570560	+	1.70193e-05
chr14	33751020	33751040	+	1.38243e-06
chr14	35377840	35377860	+	0.000166722
chr14	39426960	39426980	+	1.70193e-05
chr14	47992200	47992220	+	1.70193e-05
chr14	51427120	51427160	+	8.55356e-06
chr14	51427200	51427300	+	3.67525e-05
chr14	51427360	51427380	+	8.78392e-08
chr14	51427400	51427420	+	7.19457e-09
chr14	51684480	51684540	+	5.67863e-06
chr14	51684840	51684900	+	8.68369e-09
chr14	51702500	51702580	+	2.73557e-08
chr14	54482960	54482980	+	8.78392e-08
chr14	55068820	55068840	+	1.70193e-05
chr14	70699760	70699780	+	7.19457e-09
chr14	70844640	70844660	+	8.78392e-08
chr14	73565080	73565100	+	0.000166722
chr14	74167680	74167700	+	0.000166722
chr14	75279580	75279600	+	0.000166722
chr14	75735900	75735920	+	9.42825e-09
chr14	76098740	76098760	+	1.70193e-05
chr14	77390080	77390100	+	8.78392e-08
chr14	84041420	84041440	+	0.000166722
chr14	99510180	99510200	+	8.78392e-08
chr14	105115160	105115200	+	4.75169e-08
chr14	118488740	118488760	+	7.19457e-09
chr14	119092720	119092740	+	9.42825e-09
chr14	121796480	121796500	+	8.78392e-08
chr15	5526880	5526900	+	0.000166722
chr15	7710980	7711000	+	1.38243e-06
chr15	10166220	10166240	+	1.38243e-06
chr15	10388100	10388120	+	8.78392e-08
chr15	12231820	12231840	+	0.000166722
chr15	24175280	24175300	+	9.42825e-09
chr15	26934780	26934800	+	1.70193e-05
chr15	36078860	36078880	+	1.70193e-05
chr15	36944460	36944480	+	1.70193e-05
chr15	38870900	38870920	+	0.000166722
chr15	40134100	40134120	+	1.38243e-06
chr15	40246800	40246820	+	1.38243e-06
chr15	41620900	41620920	+	1.70193e-05
chr15	42501960	42501980	+	1.70193e-05
chr15	44803740	44803760	+	0.000166722
chr15	53457960	53457980	+	0.000166722
chr15	54746660	54746680	+	1.38243e-06
chr15	57264760	57264780	+	1.38243e-06
chr15	57598840	57598860	+	1.70193e-05
chr15	63886940	63886960	+	8.78392e-08
chr15	69227060	69227080	+	7.19457e-09
chr15	70865920	70865940	+	0.000166722
chr15	72085780	72085800	+	1.70193e-05
chr15	74357140	74357160	+	8.78392e-08
chr15	76877200	76877220	+	0.000166722
chr15	77043940	77043960	+	0.000166722
chr15	78513240	78513260	+	0.000166722
chr15	78593640	78593660	+	7.19457e-09
chr15	78772940	78772960	+	1.70193e-05
chr15	79908920	79908940	+	0.000166722
chr15	79908980	79909000	+	0.000166722
chr15	80760820	80760840	+	0.000166722
chr15	81870000	81870020	+	0.000166722
chr15	85102480	85102500	+	0.000166722
chr15	85523180	85523200	+	1.70193e-05
chr15	88469920	88469940	+	0.000166722
chr15	89716440	89716460	+	9.42825e-09
chr15	93206000	93206020	+	0.000166722
chr15	97862680	97862700	+	1.38243e-06
chr15	98550160	98550180	+	8.78392e-08
chr15	100446460	100446480	+	0.000166722
chr15	100556080	100556100	+	1.70193e-05
chr15	102094560	102094580	+	1.38243e-06
chr15	102538220	102538240	+	1.70193e-05
chr15	103052240	103052260	+	1.70193e-05
chr16	4469020	4469040	+	0.000166722
chr16	7408980	7409000	+	1.38243e-06
chr16	8498120	8498140	+	1.38243e-06
chr16	8701440	8701460	+	1.70193e-05
chr16	10070760	10070780	+	1.70193e-05
chr16	10995800	10995820	+	0.000166722
chr16	14807280	14807300	+	0.000166722
chr16	16958980	16959000	+	1.38243e-06
chr16	17199200	17199220	+	1.38243e-06
chr16	17205880	17205900	+	8.78392e-08
chr16	17607180	17607200	+	1.70193e-05
chr16	17757420	17757440	+	8.78392e-08
chr16	22152000	22152020	+	8.78392e-08
chr16	30373600	30373620	+	7.19457e-09
chr16	32190560	32190600	+	0.000166722
chr16	33692000	33692020	+	9.42825e-09
chr16	35234960	35235000	+	6.95931e-07
chr16	36512120	36512140	+	1.70193e-05
chr16	43185140	43185160	+	1.38243e-06
chr16	44492720	44492740	+	0.000166722
chr16	44549940	44549960	+	1.70193e-05
chr16	44736420	44736440	+	1.70193e-05
chr16	45036460	45036480	+	1.38243e-06
chr16	53403100	53403120	+	1.70193e-05
chr16	56050680	56050700	+	1.70193e-05
chr16	57391360	57391420	+	5.55787e-05
chr16	57391560	57391580	+	7.19457e-09
chr16	59502520	59502540	+	8.78392e-08
chr16	70313320	70313340	+	7.19457e-09
chr16	71175080	71175100	+	1.70193e-05
chr16	73749320	73749340	+	1.70193e-05
chr16	74282080	74282100	+	0.000166722
chr16	76292980	76293000	+	0.000166722
chr16	81262160	81262180	+	8.78392e-08
chr16	81262220	81262240	+	1.70193e-05
chr16	81475800	81475820	+	0.000166722
chr16	87797120	87797140	+	0.000166722
chr16	89159320	89159340	+	1.38243e-06
chr16	91921580	91921600	+	8.78392e-08
chr16	92421060	92421080	+	0.000166722
chr17	5497420	5497440	+	0.000166722
chr17	6473140	6473160	+	1.70193e-05
chr17	13624920	13624940	+	0.000166722
chr17	13672860	13672880	+	1.70193e-05
chr17	19874900	19874920	+	0.000166722
chr17	22484880	22484900	+	1.70193e-05
chr17	23672320	23672360	+	8.33644e-05
chr17	23678100	23678120	+	7.19457e-09
chr17	23683440	23683500	+	5.70477e-06
chr17	23685720	23685780	+	5.55787e-05
chr17	23687220	23687240	+	7.19457e-09
chr17	26181640	26181660	+	1.70193e-05
chr17	26827620	26827660	+	7.35137e-07
chr17	26963460	26963480	+	1.70193e-05
chr17	27571480	27571500	+	1.38243e-06
chr17	27621380	27621400	+	1.38243e-06
chr17	28610040	28610060	+	7.19457e-09
chr17	29478400	29478420	+	0.000166722
chr17	29655460	29655480	+	0.000166722
chr17	30663880	30663900	+	0.000166722
chr17	32368380	32368400	+	9.42825e-09
chr17	32455960	32455980	+	0.000166722
chr17	34771520	34771540	+	1.70193e-05
chr17	34824640	34824660	+	0.000166722
chr17	35089180	35089200	+	1.38243e-06
chr17	35632220	35632240	+	7.19457e-09
chr17	37404140	37404160	+	8.78392e-08
chr17	39206960	39206980	+	1.38243e-06
chr17	44159300	44159320	+	0.000166722
chr17	45533380	45533400	+	1.70193e-05
chr17	46107600	46107620	+	8.78392e-08
chr17	47948840	47948860	+	9.42825e-09
chr17	51724580	51724600	+	0.000166722
chr17	52027040	52027060	+	1.70193e-05
chr17	53534180	53534200	+	0.000166722
chr17	56231420	56231480	+	7.19457e-09
chr17	58773920	58773940	+	0.000166722
chr17	63386640	63386660	+	1.70193e-05
chr17	68930480	68930500	+	1.70193e-05
chr17	75607720	75607740	+	0.000166722
chr17	80452700	80452720	+	0.000166722
chr17	80582920	80582940	+	1.38243e-06
chr17	83604540	83604560	+	1.38243e-06
chr17	93646040	93646060	+	1.38243e-06
chr18	3012640	3012680	+	4.75169e-08
chr18	4375660	4375680	+	1.70193e-05
chr18	10052120	10052140	+	7.19457e-09
chr18	10151000	10151060	+	5.55802e-05
chr18	10151080	10151120	+	8.55356e-06
chr18	10162600	10162620	+	1.70193e-05
chr18	14561780	14561800	+	7.19457e-09
chr18	14806300	14806360	+	5.67938e-06
chr18	14806380	14806420	+	8.34048e-05
chr18	15333940	15333960	+	1.70193e-05
chr18	20954820	20954840	+	8.78392e-08
chr18	25545220	25545240	+	9.42825e-09
chr18	31772300	31772320	+	0.000166722
chr18	34660520	34660540	+	1.70193e-05
chr18	35073500	35073540	+	9.20086e-06
chr18	35099780	35099800	+	1.38243e-06
chr18	36421420	36421440	+	9.42825e-09
chr18	43742080	43742100	+	1.70193e-05
chr18	44727380	44727400	+	1.38243e-06
chr18	46663360	46663380	+	0.000166722
chr18	49926220	49926240	+	1.38243e-06
chr18	52881060	52881080	+	1.70193e-05
chr18	55782340	55782360	+	1.38243e-06
chr18	55782400	55782420	+	7.19457e-09
chr18	55782460	55782520	+	3.40761e-08
chr18	57274060	57274080	+	7.19457e-09
chr18	57994140	57994160	+	7.19457e-09
chr18	58641460	58641480	+	0.000166722
chr18	61030380	61030400	+	0.000166722
chr18	65060860	65060880	+	0.000166722
chr18	67334540	67334580	+	6.94814e-07
chr18	67370820	67370840	+	7.19457e-09
chr18	67878200	67878220	+	0.000166722
chr18	70020300	70020320	+	7.19457e-09
chr18	71022860	71022880	+	1.38243e-06
chr18	71582980	71583020	+	8.31141e-09
chr18	74228260	74228280	+	1.38243e-06
chr18	74397520	74397540	+	8.78392e-08
chr18	74956040	74956060	+	7.19457e-09
chr18	75328160	75328180	+	9.42825e-09
chr19	4078380	4078400	+	0.000166722
chr19	5038300	5038340	+	4.75169e-08
chr19	5452640	5452660	+	1.38243e-06
chr19	5800180	5800200	+	1.70193e-05
chr19	5801020	5801040	+	0.000166722
chr19	6919280	6919300	+	0.000166722
chr19	10020040	10020060	+	1.38243e-06
chr19	12084180	12084240	+	5.70477e-06
chr19	12936620	12936640	+	0.000166722
chr19	14628580	14628600	+	0.000166722
chr19	19171100	19171120	+	8.78392e-08
chr19	22122660	22122680	+	0.000166722
chr19	22982980	22983000	+	0.000166722
chr19	24937580	24937600	+	9.42825e-09
chr19	25489020	25489040	+	7.19457e-09
chr19	26765760	26765780	+	8.78392e-08
chr19	26869100	26869120	+	1.70193e-05
chr19	33000200	33000220	+	1.70193e-05
chr19	38144000	38144020	+	8.78392e-08
chr19	44319620	44319640	+	0.000166722
chr19	46026220	46026240	+	1.38243e-06
chr19	47058940	47058980	+	9.18705e-05
chr19	51216960	51216980	+	1.38243e-06
chr19	54024500	54024520	+	1.38243e-06
chr19	58676140	58676160	+	9.42825e-09
chr19	59059340	59059360	+	8.78392e-08
chr2	4863800	4863820	+	1.70193e-05
chr2	5687840	5687860	+	8.78392e-08
chr2	6997240	6997400	+	4.18681e-05
chr2	6997420	6997440	+	1.70193e-05
chr2	11445420	11445440	+	1.38243e-06
chr2	16179240	16179260	+	8.78392e-08
chr2	18137020	18137040	+	1.70193e-05
chr2	18508660	18508720	+	5.67863e-06
chr2	22444760	22444780	+	0.000166722
chr2	22445480	22445520	+	9.18705e-05
chr2	24861700	24861720	+	1.70193e-05
chr2	26058220	26058240	+	1.38243e-06
chr2	27297320	27297340	+	0.000166722
chr2	27793180	27793200	+	1.70193e-05
chr2	28368840	28368860	+	1.38243e-06
chr2	28641820	28641840	+	1.70193e-05
chr2	28654200	28654220	+	9.42825e-09
chr2	28843040	28843060	+	1.38243e-06
chr2	28958280	28958300	+	1.38243e-06
chr2	30013400	30013420	+	0.000166722
chr2	30992140	30992160	+	0.000166722
chr2	31115500	31115520	+	9.42825e-09
chr2	37697600	37697620	+	1.38243e-06
chr2	40779220	40779240	+	8.78392e-08
chr2	41915700	41915720	+	1.38243e-06
chr2	44667340	44667360	+	0.000166722
chr2	52960320	52960340	+	8.78392e-08
chr2	57034820	57034860	+	6.94814e-07
chr2	59795800	59795820	+	8.78392e-08
chr2	59835620	59835640	+	8.78392e-08
chr2	65223380	65223400	+	1.38243e-06
chr2	68160080	68160100	+	0.000166722
chr2	69711420	69711440	+	7.19457e-09
chr2	71654280	71654300	+	1.70193e-05
chr2	72918200	72918220	+	7.19457e-09
chr2	90191200	90191220	+	1.70193e-05
chr2	90269440	90269460	+	9.42825e-09
chr2	90317300	90317320	+	9.42825e-09
chr2	96515800	96515820	+	9.42825e-09
chr2	104295380	104295400	+	1.70193e-05
chr2	106633960	106633980	+	7.19457e-09
chr2	107559700	107559720	+	7.19457e-09
chr2	109163640	109163660	+	9.42825e-09
chr2	113316900	113316920	+	1.70193e-05
chr2	113389520	113389540	+	1.70193e-05
chr2	115448720	115448740	+	1.38243e-06
chr2	116793780	116793800	+	1.38243e-06
chr2	117641820	117641840	+	1.70193e-05
chr2	118005260	118005300	+	1.70193e-05
chr2	118872480	118872500	+	7.19457e-09
chr2	119394240	119394260	+	1.70193e-05
chr2	119567220	119567240	+	9.42825e-09
chr2	119578460	119578480	+	0.000166722
chr2	122201240	122201260	+	0.000166722
chr2	122203100	122203120	+	8.78392e-08
chr2	122203140	122203160	+	7.19457e-09
chr2	125935640	125935680	+	9.18705e-05
chr2	127091200	127091220	+	1.70193e-05
chr2	128028680	128028700	+	7.19457e-09
chr2	128935200	128935220	+	7.19457e-09
chr2	136537140	136537160	+	1.38243e-06
chr2	139940340	139940360	+	1.70193e-05
chr2	140418080	140418100	+	1.70193e-05
chr2	142742200	142742220	+	0.000166722
chr2	144091880	144091900	+	9.42825e-09
chr2	146664660	146664680	+	0.000166722
chr2	147474940	147474960	+	1.70193e-05
chr2	155932940	155932960	+	1.38243e-06
chr2	156218800	156218820	+	0.000166722
chr2	157718360	157718380	+	9.42825e-09
chr2	158182160	158182180	+	9.42825e-09
chr2	161370120	161370140	+	0.000166722
chr2	162693120	162693140	+	8.78392e-08
chr2	164338040	164338060	+	8.78392e-08
chr2	165720360	165720400	+	6.94814e-07
chr2	166343320	166343340	+	7.19457e-09
chr2	166815680	166815700	+	0.000166722
chr2	168608440	168608460	+	8.78392e-08
chr2	169869060	169869080	+	7.19457e-09
chr2	171850620	171850640	+	0.000166722
chr2	174493700	174493720	+	8.78392e-08
chr3	4907360	4907380	+	8.78392e-08
chr3	9034880	9034900	+	0.000166722
chr3	10280120	10280140	+	1.38243e-06
chr3	14513300	14513320	+	1.38243e-06
chr3	17039720	17039740	+	9.42825e-09
chr3	18077520	18077560	+	0.000166722
chr3	18077580	18077600	+	0.000166722
chr3	19516560	19516580	+	0.000166722
chr3	19527960	19528020	+	5.67863e-06
chr3	24062000	24062020	+	1.70193e-05
chr3	28169100	28169120	+	1.70193e-05
chr3	31045280	31045300	+	8.78392e-08
chr3	41301020	41301040	+	1.70193e-05
chr3	42258620	42258660	+	9.18705e-05
chr3	44839940	44839960	+	8.78392e-08
chr3	45497380	45497400	+	7.19457e-09
chr3	50794600	50794620	+	1.70193e-05
chr3	51142960	51142980	+	7.19457e-09
chr3	51893760	51893780	+	1.38243e-06
chr3	66756200	66756220	+	0.000166722
chr3	75846020	75846040	+	0.000166722
chr3	79309180	79309200	+	1.38243e-06
chr3	80646600	80646620	+	1.70193e-05
chr3	82186360	82186380	+	1.38243e-06
chr3	84032940	84032980	+	7.19457e-09
chr3	84141780	84141800	+	0.000166722
chr3	88774540	88774560	+	1.70193e-05
chr3	89325280	89325300	+	1.70193e-05
chr3	89754820	89754840	+	0.000166722
chr3	89771960	89772000	+	4.75169e-08
chr3	90279760	90279840	+	8.33846e-05
chr3	94375940	94375960	+	7.19457e-09
chr3	94560880	94560900	+	0.000166722
chr3	95085640	95085660	+	1.38243e-06
chr3	96042640	96042680	+	9.18705e-05
chr3	96138540	96138560	+	0.000166722
chr3	96145080	96145120	+	7.19457e-09
chr3	96163500	96163520	+	0.000166722
chr3	96163900	96163960	+	4.66352e-07
chr3	96164000	96164020	+	1.38243e-06
chr3	96191340	96191380	+	7.19457e-09
chr3	96202980	96203040	+	5.55787e-05
chr3	96227960	96228000	+	7.19457e-09
chr3	96262000	96262020	+	8.78392e-08
chr3	96262040	96262060	+	9.42825e-09
chr3	96263060	96263120	+	5.55794e-05
chr3	96263960	96264040	+	4.2374e-05
chr3	96264080	96264100	+	8.78392e-08
chr3	96267880	96267960	+	4.59388e-05
chr3	96290480	96290560	+	4.59388e-05
chr3	96290580	96290620	+	8.40521e-05
chr3	96304300	96304320	+	0.000166722
chr3	96304940	96305000	+	5.67789e-06
chr3	96305360	96305400	+	9.20086e-06
chr3	96362880	96362900	+	9.42825e-09
chr3	98181720	98181740	+	9.42825e-09
chr3	99511680	99511700	+	0.000166722
chr3	102094460	102094480	+	7.19457e-09
chr3	103510840	103510860	+	1.70193e-05
chr3	107969700	107969720	+	0.000166722
chr3	108879680	108879700	+	8.78392e-08
chr3	116725060	116725080	+	1.70193e-05
chr3	121995860	121995880	+	7.19457e-09
chr3	122668960	122668980	+	0.000166722
chr3	122806680	122806700	+	1.70193e-05
chr3	124921900	124921920	+	1.70193e-05
chr3	126978740	126978760	+	9.42825e-09
chr3	128719980	128720000	+	9.42825e-09
chr3	129832720	129832740	+	9.42825e-09
chr3	131012080	131012100	+	9.42825e-09
chr3	132625200	132625220	+	1.38243e-06
chr3	136611520	136611540	+	1.70193e-05
chr3	137802680	137802700	+	1.70193e-05
chr3	139080720	139080760	+	1.70193e-05
chr3	140628160	140628180	+	1.70193e-05
chr3	144074080	144074100	+	1.70193e-05
chr3	150507180	150507200	+	1.70193e-05
chr3	150840280	150840300	+	7.19457e-09
chr3	152143600	152143620	+	1.70193e-05
chr4	3772240	3772260	+	0.000166722
chr4	8866900	8866920	+	1.38243e-06
chr4	10447800	10447820	+	7.19457e-09
chr4	11327320	11327340	+	9.42825e-09
chr4	12020300	12020320	+	1.70193e-05
chr4	12071180	12071200	+	8.78392e-08
chr4	12685120	12685140	+	0.000166722
chr4	13912660	13912680	+	1.70193e-05
chr4	28712340	28712360	+	1.70193e-05
chr4	32625460	32625480	+	0.000166722
chr4	38407100	38407120	+	1.70193e-05
chr4	41511480	41511500	+	7.19457e-09
chr4	42312780	42312800	+	1.70193e-05
chr4	42503360	42503380	+	0.000166722
chr4	43391420	43391440	+	1.70193e-05
chr4	43505660	43505700	+	9.20086e-06
chr4	43505720	43505740	+	7.19457e-09
chr4	43505780	43505920	+	2.64506e-05
chr4	44306060	44306080	+	0.000166722
chr4	44941380	44941400	+	8.78392e-08
chr4	45565180	45565200	+	0.000166722
chr4	45779020	45779040	+	1.38243e-06
chr4	46099940	46099960	+	0.000166722
chr4	51825380	51825440	+	4.92489e-07
chr4	53165860	53165880	+	1.70193e-05
chr4	53963640	53963660	+	1.38243e-06
chr4	55312600	55312620	+	7.19457e-09
chr4	57259960	57259980	+	8.78392e-08
chr4	58851800	58851820	+	1.38243e-06
chr4	59247200	59247220	+	0.000166722
chr4	65344200	65344220	+	8.78392e-08
chr4	82265560	82265580	+	8.78392e-08
chr4	87565880	87565900	+	1.38243e-06
chr4	97822000	97822020	+	7.19457e-09
chr4	98007860	98007880	+	1.38243e-06
chr4	98780520	98780540	+	1.38243e-06
chr4	99676760	99676780	+	9.42825e-09
chr4	105827120	105827140	+	0.000166722
chr4	106347980	106348000	+	1.38243e-06
chr4	107544360	107544380	+	0.000166722
chr4	107992160	107992180	+	9.42825e-09
chr4	108139540	108139580	+	0.000166722
chr4	108863420	108863440	+	0.000166722
chr4	113162720	113162740	+	1.38243e-06
chr4	116761660	116761680	+	1.38243e-06
chr4	116827840	116827860	+	1.38243e-06
chr4	117402100	117402140	+	9.18705e-05
chr4	118737880	118737900	+	7.19457e-09
chr4	118961880	118961900	+	0.000166722
chr4	120077580	120077600	+	0.000166722
chr4	121870880	121870920	+	8.33656e-05
chr4	122132520	122132540	+	7.19457e-09
chr4	122633880	122633900	+	8.78392e-08
chr4	124157560	124157580	+	7.19457e-09
chr4	124268380	124268400	+	1.70193e-05
chr4	125203860	125203880	+	8.78392e-08
chr4	125786960	125786980	+	1.38243e-06
chr4	127151900	127151920	+	8.78392e-08
chr4	127887440	127887460	+	7.19457e-09
chr4	128215960	128215980	+	1.70193e-05
chr4	128889440	128889460	+	1.70193e-05
chr4	128932860	128932880	+	1.70193e-05
chr4	130604780	130604800	+	1.38243e-06
chr4	131605420	131605440	+	7.19457e-09
chr4	131908280	131908320	+	9.20086e-06
chr4	131908720	131908760	+	6.95931e-07
chr4	132670440	132670460	+	8.78392e-08
chr4	134842080	134842100	+	8.78392e-08
chr4	135155300	135155320	+	0.000166722
chr4	136390860	136390880	+	1.38243e-06
chr4	137293760	137293780	+	0.000166722
chr4	141226820	141226840	+	0.000166722
chr4	141400780	141400800	+	1.38243e-06
chr4	142485580	142485600	+	9.42825e-09
chr4	142682900	142682920	+	7.19457e-09
chr4	148576500	148576520	+	7.19457e-09
chr4	149606580	149606600	+	0.000166722
chr4	150483000	150483020	+	1.70193e-05
chr4	154248400	154248420	+	1.38243e-06
chr4_random	144860	144880	+	9.42825e-09
chr5	3100080	3100100	+	7.19457e-09
chr5	6502780	6502800	+	1.38243e-06
chr5	20898020	20898040	+	0.000166722
chr5	20961120	20961140	+	0.000166722
chr5	21687400	21687420	+	9.42825e-09
chr5	22647560	22647580	+	9.42825e-09
chr5	24910740	24910760	+	7.19457e-09
chr5	37089060	37089080	+	1.38243e-06
chr5	38174960	38174980	+	7.19457e-09
chr5	38424800	38424820	+	0.000166722
chr5	44243700	44243720	+	0.000166722
chr5	53567520	53567540	+	7.19457e-09
chr5	59606200	59606220	+	1.70193e-05
chr5	66725500	66725520	+	1.70193e-05
chr5	68580080	68580100	+	0.000166722
chr5	72559560	72559580	+	7.19457e-09
chr5	72809980	72810000	+	1.70193e-05
chr5	73558340	73558360	+	1.38243e-06
chr5	74093940	74093960	+	1.38243e-06
chr5	74278460	74278480	+	7.19457e-09
chr5	77240540	77240560	+	0.000166722
chr5	77279420	77279440	+	7.19457e-09
chr5	86368320	86368340	+	9.42825e-09
chr5	86440940	86440960	+	1.70193e-05
chr5	87085640	87085660	+	1.38243e-06
chr5	87345260	87345280	+	0.000166722
chr5	87725260	87725280	+	0.000166722
chr5	87881880	87881900	+	7.19457e-09
chr5	89731080	89731100	+	9.42825e-09
chr5	90766700	90766720	+	1.38243e-06
chr5	91646920	91646940	+	1.70193e-05
chr5	92246280	92246300	+	1.70193e-05
chr5	98670260	98670280	+	1.38243e-06
chr5	100935880	100935900	+	0.000166722
chr5	101029460	101029480	+	1.38243e-06
chr5	101421900	101421940	+	8.31141e-09
chr5	102577620	102577640	+	1.70193e-05
chr5	102885140	102885160	+	1.70193e-05
chr5	103504560	103504580	+	0.000166722
chr5	103687080	103687100	+	7.19457e-09
chr5	104305600	104305620	+	0.000166722
chr5	106653000	106653020	+	1.70193e-05
chr5	110844980	110845000	+	0.000166722
chr5	111688640	111688660	+	0.000166722
chr5	113439360	113439400	+	8.40521e-05
chr5	114127540	114127560	+	1.38243e-06
chr5	114323320	114323340	+	7.19457e-09
chr5	114922740	114922760	+	1.70193e-05
chr5	118117640	118117660	+	8.78392e-08
chr5	118382940	118382960	+	0.000166722
chr5	118563560	118563580	+	7.19457e-09
chr5	118603800	118603820	+	0.000166722
chr5	118641660	118641680	+	7.19457e-09
chr5	119062840	119062860	+	1.38243e-06
chr5	121527980	121528000	+	1.70193e-05
chr5	122344520	122344560	+	8.34048e-05
chr5	124034980	124035000	+	0.000166722
chr5	124465600	124465620	+	0.000166722
chr5	125643140	125643160	+	1.70193e-05
chr5	125660900	125660920	+	1.38243e-06
chr5	125663640	125663660	+	1.70193e-05
chr5	125866860	125866880	+	7.19457e-09
chr5	125867300	125867340	+	9.18705e-05
chr5	125867540	125867560	+	7.19457e-09
chr5	125868000	125868020	+	7.19457e-09
chr5	125868440	125868480	+	9.18705e-05
chr5	125884620	125884680	+	5.56056e-05
chr5	125886000	125886040	+	8.33644e-05
chr5	125886420	125886440	+	7.19457e-09
chr5	125889400	125889440	+	7.19457e-09
chr5	128992960	128992980	+	1.70193e-05
chr5	130508300	130508340	+	6.94814e-07
chr5	132998260	132998280	+	1.38243e-06
chr5	133037340	133037360	+	8.78392e-08
chr5	133179180	133179200	+	9.42825e-09
chr5	135065340	135065360	+	8.78392e-08
chr5	136539360	136539380	+	9.42825e-09
chr5	137183780	137183800	+	0.000166722
chr5	137538080	137538100	+	1.70193e-05
chr5	140472200	140472220	+	1.70193e-05
chr5	143668340	143668360	+	1.70193e-05
chr5	144343480	144343500	+	1.70193e-05
chr5	148675260	148675280	+	0.000166722
chr5	150040580	150040620	+	6.95931e-07
chr5	150059540	150059580	+	8.33644e-05
chr5	150059640	150059660	+	7.19457e-09
chr5	150059720	150059740	+	9.42825e-09
chr5	150354040	150354060	+	0.000166722
chr5	152502800	152502820	+	1.38243e-06
chr6	4484120	4484140	+	1.38243e-06
chr6	5398560	5398580	+	0.000166722
chr6	18794720	18794740	+	1.70193e-05
chr6	28051700	28051720	+	1.38243e-06
chr6	28643200	28643220	+	1.70193e-05
chr6	30094000	30094020	+	7.19457e-09
chr6	33631740	33631760	+	0.000166722
chr6	39274600	39274620	+	7.19457e-09
chr6	40534440	40534460	+	7.19457e-09
chr6	43708980	43709000	+	8.78392e-08
chr6	48090520	48090540	+	0.000166722
chr6	49069180	49069200	+	1.70193e-05
chr6	49162480	49162500	+	1.70193e-05
chr6	50120300	50120320	+	8.78392e-08
chr6	50349820	50349840	+	1.70193e-05
chr6	50993420	50993440	+	7.19457e-09
chr6	51972380	51972400	+	1.38243e-06
chr6	52260300	52260320	+	1.70193e-05
chr6	56633460	56633480	+	1.38243e-06
chr6	56776960	56776980	+	1.70193e-05
chr6	58999660	58999680	+	0.000166722
chr6	59561180	59561200	+	0.000166722
chr6	60613480	60613500	+	0.000166722
chr6	70702920	70702940	+	8.78392e-08
chr6	75794260	75794280	+	1.38243e-06
chr6	77811700	77811720	+	1.70193e-05
chr6	81686800	81686820	+	1.38243e-06
chr6	83386240	83386260	+	1.70193e-05
chr6	83620020	83620040	+	8.78392e-08
chr6	86508480	86508500	+	0.000166722
chr6	87681540	87681560	+	1.70193e-05
chr6	87800200	87800220	+	7.19457e-09
chr6	88338280	88338300	+	0.000166722
chr6	88953760	88953780	+	1.70193e-05
chr6	90769240	90769260	+	7.19457e-09
chr6	95649040	95649060	+	0.000166722
chr6	98633460	98633480	+	0.000166722
chr6	98960160	98960180	+	1.38243e-06
chr6	99563880	99563900	+	1.70193e-05
chr6	100285120	100285140	+	8.78392e-08
chr6	100421560	100421580	+	7.19457e-09
chr6	100560400	100560420	+	1.38243e-06
chr6	100669180	100669200	+	1.70193e-05
chr6	101818920	101818940	+	1.70193e-05
chr6	104860200	104860220	+	1.38243e-06
chr6	106163100	106163120	+	0.000166722
chr6	108609900	108609920	+	1.70193e-05
chr6	112289600	112289620	+	1.38243e-06
chr6	114284500	114284520	+	8.78392e-08
chr6	115604020	115604040	+	0.000166722
chr6	117767120	117767140	+	1.70193e-05
chr6	117786400	117786420	+	1.38243e-06
chr6	118618640	118618660	+	0.000166722
chr6	119312300	119312320	+	0.000166722
chr6	123145700	123145720	+	7.19457e-09
chr6	124612060	124612080	+	9.42825e-09
chr6	125167320	125167340	+	1.70193e-05
chr6	127925860	127925880	+	1.70193e-05
chr6	132290660	132290680	+	0.000166722
chr6	135699040	135699060	+	7.19457e-09
chr6	136692040	136692060	+	1.70193e-05
chr6	144950900	144950920	+	0.000166722
chr6	145881320	145881380	+	5.60371e-05
chr6	145881480	145881540	+	5.56063e-05
chr6	148496540	148496560	+	0.000166722
chr7	10519240	10519260	+	0.000166722
chr7	12552520	12552540	+	1.38243e-06
chr7	16524180	16524200	+	8.78392e-08
chr7	17636600	17636620	+	0.000166722
chr7	29043180	29043200	+	0.000166722
chr7	29244920	29244940	+	1.70193e-05
chr7	29579000	29579060	+	0.00011115
chr7	30615060	30615080	+	1.70193e-05
chr7	36107740	36107760	+	7.19457e-09
chr7	51150600	51150620	+	1.38243e-06
chr7	52382240	52382260	+	1.38243e-06
chr7	54042200	54042220	+	1.38243e-06
chr7	56125500	56125520	+	9.42825e-09
chr7	61631060	61631080	+	1.70193e-05
chr7	67674760	67674780	+	8.78392e-08
chr7	71054060	71054080	+	7.19457e-09
chr7	73438240	73438260	+	1.38243e-06
chr7	76643460	76643500	+	8.33656e-05
chr7	80002400	80002420	+	1.70193e-05
chr7	85942800	85942820	+	8.78392e-08
chr7	86888720	86888740	+	0.000166722
chr7	87863020	87863040	+	7.19457e-09
chr7	88325260	88325280	+	0.000166722
chr7	91471840	91471860	+	0.000166722
chr7	96357560	96357580	+	9.42825e-09
chr7	97604980	97605000	+	0.000166722
chr7	97863580	97863600	+	9.42825e-09
chr7	98815740	98815760	+	0.000166722
chr7	99805240	99805260	+	9.42825e-09
chr7	105761340	105761360	+	1.70193e-05
chr7	105964180	105964240	+	5.70477e-06
chr7	111440200	111440220	+	1.38243e-06
chr7	114761920	114761940	+	1.70193e-05
chr7	116167720	116167740	+	1.70193e-05
chr7	116433980	116434000	+	1.38243e-06
chr7	116918120	116918160	+	8.55356e-06
chr7	120289840	120289860	+	0.000166722
chr7	122680360	122680380	+	0.000166722
chr7	125007960	125007980	+	1.70193e-05
chr7	125947740	125947760	+	1.70193e-05
chr7	125961060	125961080	+	1.38243e-06
chr7	127179860	127179880	+	0.000166722
chr7	127978980	127979020	+	4.75169e-08
chr7	127979040	127979060	+	7.19457e-09
chr7	128044140	128044160	+	1.70193e-05
chr7	129273000	129273020	+	7.19457e-09
chr7	130472460	130472480	+	7.19457e-09
chr7	131006680	131006700	+	9.42825e-09
chr7	132565460	132565480	+	0.000166722
chr7	133341500	133341540	+	9.18705e-05
chr7	133707400	133707440	+	8.34048e-05
chr7	134190700	134190720	+	8.78392e-08
chr7	134846140	134846160	+	0.000166722
chr7	136359820	136359840	+	7.19457e-09
chr7	140241440	140241460	+	1.70193e-05
chr7	140328380	140328400	+	0.000166722
chr7	144205060	144205080	+	1.70193e-05
chr7	146727120	146727140	+	7.19457e-09
chr7	151454680	151454700	+	1.70193e-05
chr7	152381440	152381460	+	0.000166722
chr8	3460740	3460760	+	1.38243e-06
chr8	3754440	3754460	+	7.19457e-09
chr8	3803140	3803160	+	7.19457e-09
chr8	3803260	3803320	+	6.69201e-05
chr8	7428220	7428260	+	7.35137e-07
chr8	8468460	8468480	+	1.38243e-06
chr8	22888080	22888100	+	0.000166722
chr8	23461300	23461320	+	7.19457e-09
chr8	23812460	23812480	+	8.78392e-08
chr8	32260360	32260380	+	1.70193e-05
chr8	32260400	32260420	+	0.000166722
chr8	36896560	36896580	+	1.38243e-06
chr8	47656340	47656360	+	1.38243e-06
chr8	48209440	48209460	+	1.38243e-06
chr8	53422280	53422320	+	4.75169e-08
chr8	53422420	53422440	+	9.42825e-09
chr8	68526240	68526280	+	9.20086e-06
chr8	78395760	78395780	+	7.19457e-09
chr8	80063240	80063260	+	7.19457e-09
chr8	80605580	80605600	+	1.70193e-05
chr8	81538280	81538300	+	0.000166722
chr8	92113360	92113380	+	8.78392e-08
chr8	93669260	93669280	+	9.42825e-09
chr8	96623380	96623420	+	7.19457e-09
chr8	97227900	97227980	+	7.75299e-09
chr8	111760860	111760880	+	9.42825e-09
chr8	113154460	113154500	+	7.19457e-09
chr8	113155160	113155200	+	4.75169e-08
chr8	114454440	114454460	+	1.70193e-05
chr8	118907780	118907800	+	7.19457e-09
chr8	120482960	120482980	+	0.000166722
chr8	121844820	121844840	+	0.000166722
chr8	126089940	126089980	+	9.18705e-05
chr8	126103420	126103460	+	9.18705e-05
chr9	7518640	7518660	+	1.38243e-06
chr9	13405160	13405180	+	0.000166722
chr9	13724400	13724420	+	1.70193e-05
chr9	22926400	22926420	+	1.70193e-05
chr9	22977560	22977580	+	1.70193e-05
chr9	24585260	24585280	+	0.000166722
chr9	24905700	24905720	+	1.70193e-05
chr9	26918980	26919000	+	1.38243e-06
chr9	31191820	31191840	+	1.70193e-05
chr9	35153860	35153880	+	0.000166722
chr9	36103820	36103840	+	7.19457e-09
chr9	42379940	42379960	+	1.70193e-05
chr9	42899720	42899740	+	0.000166722
chr9	44607420	44607440	+	0.000166722
chr9	45203360	45203380	+	0.000166722
chr9	48723500	48723520	+	1.70193e-05
chr9	50310300	50310320	+	1.38243e-06
chr9	53027440	53027460	+	1.70193e-05
chr9	54460280	54460300	+	1.70193e-05
chr9	55748520	55748540	+	1.70193e-05
chr9	57615220	57615240	+	7.19457e-09
chr9	59093340	59093360	+	1.70193e-05
chr9	59272320	59272340	+	1.38243e-06
chr9	61308780	61308800	+	0.000166722
chr9	61762200	61762220	+	7.19457e-09
chr9	65044420	65044480	+	5.55787e-05
chr9	65049580	65049600	+	8.78392e-08
chr9	65049620	65049640	+	0.000166722
chr9	69784200	69784220	+	1.38243e-06
chr9	71301600	71301620	+	0.000166722
chr9	75257340	75257360	+	7.19457e-09
chr9	77766480	77766500	+	9.42825e-09
chr9	78023220	78023380	+	4.18681e-05
chr9	78023400	78023420	+	7.19457e-09
chr9	83832000	83832020	+	1.38243e-06
chr9	85101840	85101860	+	1.38243e-06
chr9	86653740	86653760	+	0.000166722
chr9	88177500	88177520	+	0.000166722
chr9	88416360	88416380	+	1.70193e-05
chr9	88421600	88421620	+	1.70193e-05
chr9	88493180	88493200	+	1.70193e-05
chr9	88752560	88752580	+	0.000166722
chr9	90021340	90021400	+	1.13486e-05
chr9	96232400	96232420	+	0.000166722
chr9	101884500	101884520	+	0.000166722
chr9	102206800	102206820	+	0.000166722
chr9	104311000	104311060	+	7.93913e-09
chr9	105122160	105122180	+	1.38243e-06
chr9	108155520	108155540	+	1.38243e-06
chr9	109250040	109250060	+	0.000166722
chr9	109260740	109260760	+	1.70193e-05
chr9	109801880	109801900	+	1.70193e-05
chr9	110041240	110041260	+	7.19457e-09
chr9	111087260	111087280	+	7.19457e-09
chr9	111477380	111477400	+	1.38243e-06
chr9	111721700	111721720	+	0.000166722
chr9	114003860	114003880	+	9.42825e-09
chr9	114293740	114293760	+	9.42825e-09
chr9	114340500	114340520	+	1.70193e-05
chr9	114434720	114434740	+	8.78392e-08
chr9	117951240	117951260	+	7.19457e-09
chr9	119229540	119229560	+	0.000166722
chr9	120595420	120595440	+	7.19457e-09
chr9	120700860	120700880	+	7.19457e-09
chr9	121175520	121175540	+	1.70193e-05
chr9	123438540	123438600	+	7.19457e-09
chrM	6860	6880	+	7.19457e-09
chrM	15360	15380	+	9.42825e-09
chrM	15960	15980	+	0.000166722
chrUn_random	639320	639340	+	1.38243e-06
chrUn_random	2093520	2093540	+	0.000166722
chrX	5031220	5031240	+	8.78392e-08
chrX	6883980	6884000	+	0.000166722
chrX	10131460	10131480	+	1.70193e-05
chrX	10540040	10540060	+	1.70193e-05
chrX	11956680	11956700	+	1.38243e-06
chrX	13892540	13892560	+	8.78392e-08
chrX	32018340	32018360	+	0.000166722
chrX	46955560	46955580	+	1.38243e-06
chrX	64036580	64036600	+	7.19457e-09
chrX	67724480	67724500	+	1.70193e-05
chrX	85144620	85144640	+	0.000166722
chrX	85144740	85144760	+	1.70193e-05
chrX	92917320	92917340	+	1.70193e-05
chrX	96167800	96167820	+	7.19457e-09
chrX	97638700	97638720	+	7.19457e-09
chrX	98287740	98287760	+	7.19457e-09
chrX	98445780	98445800	+	8.78392e-08
chrX	101116240	101116260	+	0.000166722
chrX	101901440	101901460	+	7.19457e-09
chrX	106211420	106211440	+	8.78392e-08
chrX	110041260	110041280	+	1.70193e-05
chrX	128941140	128941160	+	1.38243e-06
chrX	132780680	132780700	+	1.70193e-05
chrX	137176760	137176780	+	9.42825e-09
chrX	137337220	137337240	+	1.70193e-05
chrX	141768800	141768840	+	6.94814e-07
chrX	141949560	141949600	+	7.19457e-09
chrX	147489380	147489400	+	1.38243e-06
chrX	149358080	149358160	+	3.71724e-07
chrX	149358200	149358240	+	6.94814e-07
chrX	149358260	149358280	+	1.70193e-05
chrX	151384560	151384580	+	0.000166722
chrX_random	189840	189860	+	7.19457e-09
chrX_random	1035840	1035880	+	8.33644e-05
chrY_random	1356120	1356140	+	0.000166722
chrY_random	2421240	2421260	+	0.000166722
chrY_random	5596420	5596440	+	0.000166722
chrY_random	6241640	6241660	+	1.70193e-05
chrY_random	10296840	10296860	+	0.000166722
chrY_random	13963620	13963640	+	0.000166722
chrY_random	15115560	15115580	+	0.000166722
chrY_random	19779980	19780000	+	1.38243e-06
chrY_random	20453820	20453840	+	0.000166722
chrY_random	21568200	21568220	+	0.000166722
chrY_random	26624320	26624340	+	0.000166722
chrY_random	27072680	27072700	+	0.000166722
chrY_random	37925520	37925540	+	0.000166722
chrY_random	38126800	38126820	+	0.000166722
chrY_random	39418280	39418300	+	0.000166722
chrY_random	46276320	46276340	+	1.70193e-05
chrY_random	47420300	47420320	+	0.000166722
chrY_random	47924740	47924760	+	1.70193e-05
chrY_random	48949240	48949260	+	1.70193e-05
chrY_random	56389300	56389320	+	0.000166722
chrY_random	57104300	57104320	+	1.38243e-06
chrY_random	57421900	57421920	+	0.000166722
chrY_random	57750940	57750960	+	0.000166722
chr1	12875400	12875420	-	1.70193e-05
chr1	13092460	13092480	-	7.19457e-09
chr1	15116500	15116520	-	1.70193e-05
chr1	32645460	32645480	-	7.19457e-09
chr1	34043060	34043080	-	9.42825e-09
chr1	34600760	34600780	-	0.000166722
chr1	37777160	37777180	-	8.78392e-08
chr1	37780260	37780280	-	7.19457e-09
chr1	37904080	37904100	-	1.38243e-06
chr1	38177780	38177800	-	1.70193e-05
chr1	39576460	39576480	-	7.19457e-09
chr1	44255560	44255580	-	7.19457e-09
chr1	47533520	47533540	-	0.000166722
chr1	55544900	55544920	-	7.19457e-09
chr1	57020380	57020400	-	0.000166722
chr1	57262600	57262620	-	1.70193e-05
chr1	57614820	57614840	-	1.38243e-06
chr1	59907540	59907560	-	8.78392e-08
chr1	66367200	66367220	-	0.000166722
chr1	72272800	72272820	-	8.78392e-08
chr1	72272920	72272940	-	8.78392e-08
chr1	72283520	72283540	-	9.42825e-09
chr1	72283640	72283660	-	7.19457e-09
chr1	72290780	72290800	-	9.42825e-09
chr1	72290900	72290920	-	7.19457e-09
chr1	72301580	72301600	-	9.42825e-09
chr1	72301700	72301720	-	7.19457e-09
chr1	72892480	72892500	-	1.38243e-06
chr1	73144520	73144540	-	8.78392e-08
chr1	74302700	74302720	-	8.78392e-08
chr1	74412360	74412380	-	1.38243e-06
chr1	74776020	74776040	-	0.000166722
chr1	76086480	76086500	-	0.000166722
chr1	77322660	77322680	-	1.38243e-06
chr1	80463680	80463700	-	8.78392e-08
chr1	81238380	81238400	-	1.38243e-06
chr1	90197260	90197280	-	1.70193e-05
chr1	91416380	91416400	-	1.38243e-06
chr1	95346160	95346180	-	9.42825e-09
chr1	97153280	97153300	-	1.70193e-05
chr1	108652520	108652540	-	1.70193e-05
chr1	111877500	111877520	-	1.70193e-05
chr1	121922020	121922040	-	7.19457e-09
chr1	121956900	121956920	-	1.70193e-05
chr1	122939860	122939880	-	1.38243e-06
chr1	130499220	130499240	-	0.000166722
chr1	131105900	131105920	-	1.70193e-05
chr1	139986560	139986580	-	1.70193e-05
chr1	140923100	140923120	-	8.78392e-08
chr1	145029980	145030000	-	0.000166722
chr1	153198920	153198940	-	1.38243e-06
chr1	156233000	156233020	-	1.70193e-05
chr1	157055240	157055260	-	1.38243e-06
chr1	157801700	157801720	-	7.19457e-09
chr1	167571760	167571780	-	7.19457e-09
chr1	167571800	167571820	-	8.78392e-08
chr1	169279200	169279220	-	0.000166722
chr1	172023960	172023980	-	1.38243e-06
chr1	172958160	172958220	-	5.70477e-06
chr1	172968740	172968800	-	5.67789e-06
chr1	172975100	172975140	-	7.19457e-09
chr1	172996100	172996160	-	5.67789e-06
chr1	172996760	172996800	-	8.31141e-09
chr1	173003740	173003760	-	7.19457e-09
chr1	173003780	173003800	-	7.19457e-09
chr1	173004420	173004460	-	7.19457e-09
chr1	173011360	173011440	-	8.51324e-06
chr1	173012000	173012040	-	7.19457e-09
chr1	173032500	173032540	-	8.51324e-06
chr1	173032880	173032920	-	7.19457e-09
chr1	173033160	173033220	-	0.00011115
chr1	173041560	173041600	-	8.31141e-09
chr1	173304720	173304740	-	1.70193e-05
chr1	178365960	178365980	-	9.42825e-09
chr1	179681180	179681200	-	1.70193e-05
chr1	180520240	180520260	-	1.70193e-05
chr1	183203980	183204000	-	1.70193e-05
chr1	183372620	183372640	-	1.38243e-06
chr1	183986180	183986200	-	7.19457e-09
chr1	188433760	188433780	-	8.78392e-08
chr1	195457320	195457340	-	1.70193e-05
chr10	6605920	6605940	-	7.19457e-09
chr10	7339540	7339560	-	1.38243e-06
chr10	7519600	7519620	-	1.38243e-06
chr10	7855140	7855160	-	0.000166722
chr10	8369740	8369760	-	8.78392e-08
chr10	9820800	9820820	-	7.19457e-09
chr10	12083200	12083220	-	8.78392e-08
chr10	12294020	12294040	-	1.70193e-05
chr10	12323880	12323900	-	1.38243e-06
chr10	15119240	15119260	-	0.000166722
chr10	15230340	15230360	-	0.000166722
chr10	18166320	18166340	-	0.000166722
chr10	18171160	18171180	-	7.19457e-09
chr10	18602220	18602240	-	1.38243e-06
chr10	18614280	18614300	-	1.38243e-06
chr10	19588760	19588780	-	7.19457e-09
chr10	23531480	23531500	-	7.19457e-09
chr10	25089360	25089380	-	1.38243e-06
chr10	25792900	25792920	-	0.000166722
chr10	26912920	26912940	-	9.42825e-09
chr10	30530940	30530980	-	7.19457e-09
chr10	32385340	32385360	-	1.38243e-06
chr10	35894860	35894880	-	9.42825e-09
chr10	36484940	36484960	-	1.38243e-06
chr10	39436500	39436520	-	7.19457e-09
chr10	39726720	39726740	-	0.000166722
chr10	39978360	39978380	-	7.19457e-09
chr10	39978400	39978420	-	0.000166722
chr10	40705240	40705260	-	0.000166722
chr10	53300920	53300940	-	1.70193e-05
chr10	59908580	59908600	-	7.19457e-09
chr10	60479380	60479400	-	8.78392e-08
chr10	60588660	60588680	-	8.78392e-08
chr10	74965000	74965020	-	1.70193e-05
chr10	77511420	77511440	-	8.78392e-08
chr10	78171560	78171580	-	0.000166722
chr10	79371980	79372000	-	1.70193e-05
chr10	79448300	79448320	-	1.70193e-05
chr10	79711900	79711940	-	6.94814e-07
chr10	88340780	88340800	-	9.42825e-09
chr10	88943180	88943200	-	0.000166722
chr10	90757760	90757780	-	1.70193e-05
chr10	93901620	93901640	-	7.19457e-09
chr10	95086300	95086320	-	1.70193e-05
chr10	95201360	95201380	-	1.38243e-06
chr10	104675180	104675200	-	7.19457e-09
chr10	109112120	109112140	-	0.000166722
chr10	111322200	111322220	-	1.38243e-06
chr10	115114100	115114120	-	0.000166722
chr10	116452260	116452280	-	7.19457e-09
chr10	116483860	116483880	-	7.19457e-09
chr10	117844320	117844340	-	7.19457e-09
chr10	121200280	121200300	-	7.19457e-09
chr10	127369480	127369500	-	1.38243e-06
chr11	4869120	4869140	-	0.000166722
chr11	4970880	4970900	-	0.000166722
chr11	7769780	7769800	-	7.19457e-09
chr11	7796580	7796600	-	1.70193e-05
chr11	7865460	7865480	-	8.78392e-08
chr11	9159360	9159380	-	0.000166722
chr11	17094640	17094660	-	0.000166722
chr11	22873160	22873180	-	7.19457e-09
chr11	27224100	27224120	-	1.70193e-05
chr11	32133240	32133260	-	1.70193e-05
chr11	32841040	32841060	-	1.70193e-05
chr11	37313840	37313860	-	1.38243e-06
chr11	40711680	40711700	-	1.38243e-06
chr11	45817760	45817780	-	0.000166722
chr11	48632040	48632080	-	8.31141e-09
chr11	48637260	48637280	-	7.19457e-09
chr11	48669780	48669800	-	7.19457e-09
chr11	48670140	48670180	-	7.19457e-09
chr11	57507160	57507180	-	1.38243e-06
chr11	57538140	57538160	-	1.38243e-06
chr11	57579500	57579520	-	1.70193e-05
chr11	58762720	58762740	-	1.38243e-06
chr11	59376820	59376840	-	0.000166722
chr11	62416960	62416980	-	7.19457e-09
chr11	63309060	63309080	-	0.000166722
chr11	65321040	65321060	-	1.38243e-06
chr11	68850500	68850560	-	7.19457e-09
chr11	68851380	68851400	-	7.19457e-09
chr11	68853880	68853900	-	7.19457e-09
chr11	68854480	68854520	-	7.19457e-09
chr11	68855320	68855340	-	7.19457e-09
chr11	68924000	68924020	-	7.19457e-09
chr11	68924420	68924440	-	7.19457e-09
chr11	68924460	68924480	-	7.19457e-09
chr11	68937740	68937800	-	5.55787e-05
chr11	70656280	70656300	-	9.42825e-09
chr11	78604860	78604880	-	1.70193e-05
chr11	78700560	78700580	-	7.19457e-09
chr11	79518180	79518200	-	7.19457e-09
chr11	82612980	82613000	-	1.38243e-06
chr11	83085000	83085020	-	9.42825e-09
chr11	83085120	83085140	-	7.19457e-09
chr11	87007700	87007720	-	9.42825e-09
chr11	87236360	87236380	-	7.19457e-09
chr11	87236460	87236480	-	1.70193e-05
chr11	87240220	87240240	-	7.19457e-09
chr11	87240280	87240360	-	3.51563e-07
chr11	87256800	87256860	-	5.67789e-06
chr11	87262180	87262240	-	5.55787e-05
chr11	87275840	87275900	-	5.55787e-05
chr11	87284920	87284980	-	5.55787e-05
chr11	91394860	91394880	-	0.000166722
chr11	95894080	95894100	-	7.19457e-09
chr11	96416320	96416340	-	0.000166722
chr11	97518900	97518920	-	0.000166722
chr11	97658420	97658440	-	1.38243e-06
chr11	99122600	99122620	-	7.19457e-09
chr11	100732460	100732480	-	9.42825e-09
chr11	101466160	101466180	-	9.42825e-09
chr11	101466280	101466300	-	7.19457e-09
chr11	101488680	101488720	-	1.38243e-06
chr11	101488800	101488820	-	7.19457e-09
chr11	101503060	101503100	-	6.94814e-07
chr11	101503180	101503200	-	7.19457e-09
chr11	101519540	101519560	-	7.19457e-09
chr11	101519660	101519700	-	9.20086e-06
chr11	102142480	102142500	-	7.19457e-09
chr11	102337340	102337360	-	1.70193e-05
chr11	103848600	103848620	-	1.70193e-05
chr11	104456800	104456820	-	0.000166722
chr11	106361960	106361980	-	7.19457e-09
chr11	106588500	106588520	-	1.38243e-06
chr11	106600900	106600920	-	7.19457e-09
chr11	106874180	106874240	-	5.55787e-05
chr11	109469820	109469840	-	0.000166722
chr11	109764840	109764860	-	1.38243e-06
chr11	113286100	113286120	-	7.19457e-09
chr11	115274320	115274340	-	7.19457e-09
chr11	115502040	115502060	-	7.19457e-09
chr11	117868660	117868680	-	0.000166722
chr11	118399620	118399640	-	1.70193e-05
chr11	121378600	121378620	-	7.19457e-09
chr12	3816520	3816540	-	0.000166722
chr12	4252420	4252440	-	7.19457e-09
chr12	4765400	4765420	-	0.000166722
chr12	8590720	8590740	-	0.000166722
chr12	9038760	9038780	-	0.000166722
chr12	9444340	9444360	-	1.70193e-05
chr12	13013880	13013900	-	0.000166722
chr12	15902580	15902600	-	7.19457e-09
chr12	25152080	25152100	-	7.19457e-09
chr12	25569940	25569960	-	1.70193e-05
chr12	29414220	29414240	-	1.38243e-06
chr12	32833300	32833320	-	0.000166722
chr12	41620300	41620320	-	7.19457e-09
chr12	52348920	52348940	-	1.70193e-05
chr12	52607460	52607480	-	1.70193e-05
chr12	53400440	53400460	-	1.38243e-06
chr12	53602340	53602360	-	1.70193e-05
chr12	53704820	53704840	-	0.000166722
chr12	55236120	55236180	-	5.55787e-05
chr12	55322740	55322760	-	1.38243e-06
chr12	55797760	55797780	-	7.19457e-09
chr12	55797860	55797880	-	0.000166722
chr12	55811280	55811320	-	9.18705e-05
chr12	55811360	55811440	-	7.35137e-07
chr12	55815200	55815220	-	7.19457e-09
chr12	55815300	55815320	-	7.19457e-09
chr12	55830580	55830600	-	7.19457e-09
chr12	55830680	55830700	-	1.70193e-05
chr12	56383120	56383140	-	1.38243e-06
chr12	58328680	58328700	-	8.78392e-08
chr12	60141320	60141340	-	7.19457e-09
chr12	60141440	60141460	-	0.000166722
chr12	70260280	70260300	-	7.19457e-09
chr12	70260340	70260380	-	8.51324e-06
chr12	70260400	70260440	-	4.75169e-08
chr12	70260460	70260520	-	3.40761e-08
chr12	71031960	71032000	-	4.75169e-08
chr12	72039040	72039060	-	1.38243e-06
chr12	74247560	74247580	-	0.000166722
chr12	74795220	74795240	-	0.000166722
chr12	80757480	80757500	-	1.70193e-05
chr12	81654420	81654440	-	7.19457e-09
chr12	81663740	81663760	-	8.78392e-08
chr12	81924540	81924560	-	8.78392e-08
chr12	82325520	82325540	-	1.70193e-05
chr12	96858060	96858080	-	1.38243e-06
chr12	98763000	98763020	-	0.000166722
chr12	100883440	100883480	-	8.33644e-05
chr12	101752220	101752240	-	8.78392e-08
chr12	104318180	104318200	-	7.19457e-09
chr12	104990520	104990540	-	0.000166722
chr12	109191160	109191180	-	9.42825e-09
chr12	111184840	111184860	-	1.70193e-05
chr12	112083540	112083600	-	7.19457e-09
chr12	118495080	118495100	-	9.42825e-09
chr12	119449380	119449400	-	1.38243e-06
chr13	4414900	4414920	-	7.19457e-09
chr13	5870200	5870220	-	1.70193e-05
chr13	7264700	7264720	-	7.19457e-09
chr13	8912000	8912020	-	7.19457e-09
chr13	19973160	19973180	-	0.000166722
chr13	20250920	20250940	-	1.38243e-06
chr13	21253300	21253320	-	8.78392e-08
chr13	21261900	21261960	-	3.40761e-08
chr13	21262060	21262120	-	7.19457e-09
chr13	21264220	21264260	-	4.75169e-08
chr13	21292060	21292080	-	7.19457e-09
chr13	21292100	21292140	-	8.33644e-05
chr13	21314460	21314500	-	8.51324e-06
chr13	21325920	21325960	-	6.94814e-07
chr13	21332820	21332860	-	8.33644e-05
chr13	21334440	21334480	-	8.51324e-06
chr13	21346080	21346140	-	7.19457e-09
chr13	21351660	21351680	-	7.19457e-09
chr13	21356480	21356500	-	7.19457e-09
chr13	21367860	21367880	-	7.19457e-09
chr13	21371560	21371580	-	7.19457e-09
chr13	21371600	21371620	-	1.38243e-06
chr13	21802440	21802480	-	7.19457e-09
chr13	21802860	21802900	-	7.19457e-09
chr13	21809700	21809740	-	9.18705e-05
chr13	21809760	21809780	-	0.000166722
chr13	21925920	21925940	-	1.38243e-06
chr13	21998980	21999000	-	7.19457e-09
chr13	21999800	21999820	-	7.19457e-09
chr13	22003180	22003220	-	4.75169e-08
chr13	22006700	22006720	-	7.19457e-09
chr13	22006760	22006780	-	7.19457e-09
chr13	22011080	22011100	-	7.19457e-09
chr13	22011120	22011140	-	7.19457e-09
chr13	22012060	22012100	-	8.78392e-08
chr13	22019720	22019740	-	7.19457e-09
chr13	22019760	22019780	-	7.19457e-09
chr13	22066900	22066940	-	8.31141e-09
chr13	22118400	22118440	-	7.19457e-09
chr13	22121080	22121140	-	5.55787e-05
chr13	22135380	22135400	-	1.38243e-06
chr13	23377260	23377320	-	4.65608e-07
chr13	23390640	23390700	-	5.55787e-05
chr13	23390920	23390980	-	4.92489e-07
chr13	23391980	23392040	-	1.13486e-05
chr13	23409360	23409380	-	0.000166722
chr13	23488920	23488980	-	8.68369e-09
chr13	23518420	23518440	-	7.19457e-09
chr13	23523280	23523340	-	6.1363e-06
chr13	23528200	23528220	-	7.19457e-09
chr13	23542520	23542540	-	7.19457e-09
chr13	23555400	23555440	-	7.19457e-09
chr13	23559000	23559020	-	1.38243e-06
chr13	23589980	23590020	-	8.33644e-05
chr13	23591940	23591980	-	4.75169e-08
chr13	23598380	23598400	-	7.19457e-09
chr13	23609060	23609100	-	7.19457e-09
chr13	23609560	23609600	-	7.19457e-09
chr13	23610000	23610020	-	7.19457e-09
chr13	23610040	23610060	-	7.19457e-09
chr13	23610900	23610960	-	5.70477e-06
chr13	23611480	23611540	-	5.55787e-05
chr13	23613780	23613800	-	7.19457e-09
chr13	23627500	23627520	-	8.78392e-08
chr13	23636520	23636560	-	8.34048e-05
chr13	23667860	23667880	-	0.000166722
chr13	23776380	23776400	-	1.70193e-05
chr13	23844440	23844460	-	0.000166722
chr13	33122160	33122180	-	8.78392e-08
chr13	41518340	41518360	-	1.70193e-05
chr13	43630620	43630660	-	8.34048e-05
chr13	44861740	44861760	-	8.78392e-08
chr13	44897720	44897740	-	9.42825e-09
chr13	44899760	44899780	-	1.70193e-05
chr13	45184100	45184120	-	0.000166722
chr13	51175660	51175680	-	1.38243e-06
chr13	51473240	51473260	-	1.70193e-05
chr13	51801160	51801180	-	1.70193e-05
chr13	53305220	53305240	-	7.19457e-09
chr13	55306100	55306120	-	1.38243e-06
chr13	55797200	55797220	-	7.19457e-09
chr13	57398820	57398840	-	1.70193e-05
chr13	59493140	59493160	-	1.70193e-05
chr13	63769060	63769080	-	9.42825e-09
chr13	72110920	72110940	-	1.70193e-05
chr13	72829560	72829580	-	8.78392e-08
chr13	73005900	73005940	-	4.75169e-08
chr13	86188760	86188780	-	1.38243e-06
chr13	97782360	97782380	-	7.19457e-09
chr13	99782540	99782560	-	1.70193e-05
chr13	101541060	101541080	-	1.38243e-06
chr13	103142300	103142320	-	0.000166722
chr13	104062620	104062640	-	0.000166722
chr13	104400300	104400320	-	0.000166722
chr13	105433040	105433060	-	1.38243e-06
chr13	105657620	105657640	-	1.70193e-05
chr13	108472620	108472640	-	1.70193e-05
chr13	108757640	108757660	-	1.38243e-06
chr13	109791920	109791940	-	8.78392e-08
chr13	111674400	111674420	-	1.70193e-05
chr13	114113020	114113040	-	0.000166722
chr13	120134900	120134920	-	1.38243e-06
chr14	6695560	6695580	-	0.000166722
chr14	9250240	9250260	-	0.000166722
chr14	12426840	12426860	-	0.000166722
chr14	18491600	18491620	-	1.70193e-05
chr14	22068500	22068520	-	0.000166722
chr14	22082980	22083000	-	1.38243e-06
chr14	25052700	25052720	-	9.42825e-09
chr14	25820580	25820600	-	0.000166722
chr14	27137400	27137420	-	1.70193e-05
chr14	27463640	27463660	-	1.38243e-06
chr14	28078520	28078540	-	1.38243e-06
chr14	30123180	30123200	-	8.78392e-08
chr14	31556940	31556960	-	1.38243e-06
chr14	31951480	31951500	-	1.38243e-06
chr14	34958820	34958840	-	1.70193e-05
chr14	40630400	40630420	-	8.78392e-08
chr14	41822460	41822480	-	1.38243e-06
chr14	42800800	42800820	-	0.000166722
chr14	42806200	42806220	-	0.000166722
chr14	43093380	43093400	-	0.000166722
chr14	43140540	43140560	-	0.000166722
chr14	43145980	43146000	-	0.000166722
chr14	43600140	43600160	-	0.000166722
chr14	44261060	44261080	-	9.42825e-09
chr14	46432480	46432500	-	7.19457e-09
chr14	48236760	48236780	-	9.42825e-09
chr14	51085700	51085720	-	7.19457e-09
chr14	51683580	51683600	-	7.19457e-09
chr14	51708360	51708380	-	7.19457e-09
chr14	51710320	51710340	-	7.19457e-09
chr14	55136520	55136580	-	5.67789e-06
chr14	56379940	56379960	-	7.19457e-09
chr14	57551680	57551700	-	0.000166722
chr14	59245040	59245060	-	0.000166722
chr14	61316560	61316580	-	1.38243e-06
chr14	63529540	63529560	-	8.78392e-08
chr14	65505280	65505300	-	0.000166722
chr14	65794820	65794840	-	1.70193e-05
chr14	66175160	66175180	-	8.78392e-08
chr14	66204600	66204620	-	1.38243e-06
chr14	66423420	66423440	-	7.19457e-09
chr14	76270880	76270900	-	0.000166722
chr14	76552580	76552620	-	7.19457e-09
chr14	79310180	79310200	-	7.19457e-09
chr14	79881460	79881520	-	4.65608e-07
chr14	84764700	84764720	-	9.42825e-09
chr14	97918720	97918740	-	1.70193e-05
chr14	102287640	102287660	-	1.70193e-05
chr14	103334660	103334680	-	0.000166722
chr14	105322500	105322520	-	0.000166722
chr14	106081040	106081060	-	0.000166722
chr14	120705440	120705460	-	0.000166722
chr14	121804700	121804720	-	1.70193e-05
chr14	122488520	122488540	-	7.19457e-09
chr14	122936900	122936920	-	1.70193e-05
chr15	6116400	6116420	-	8.78392e-08
chr15	7031140	7031160	-	1.38243e-06
chr15	10803100	10803120	-	8.78392e-08
chr15	12754160	12754180	-	8.78392e-08
chr15	15408740	15408760	-	1.70193e-05
chr15	16083260	16083280	-	0.000166722
chr15	16930820	16930840	-	9.42825e-09
chr15	27627120	27627140	-	1.38243e-06
chr15	29060960	29060980	-	7.19457e-09
chr15	34017260	34017280	-	1.70193e-05
chr15	47371540	47371580	-	7.19457e-09
chr15	47624240	47624260	-	0.000166722
chr15	52006660	52006680	-	7.19457e-09
chr15	58630740	58630760	-	1.70193e-05
chr15	59470500	59470520	-	1.38243e-06
chr15	59474020	59474040	-	1.70193e-05
chr15	63886940	63886960	-	0.000166722
chr15	63944820	63944840	-	0.000166722
chr15	72979080	72979100	-	1.38243e-06
chr15	76617120	76617140	-	0.000166722
chr15	76824000	76824020	-	7.19457e-09
chr15	77210260	77210280	-	0.000166722
chr15	79171200	79171220	-	1.70193e-05
chr15	81399000	81399020	-	0.000166722
chr15	81859420	81859440	-	0.000166722
chr15	82874540	82874560	-	1.38243e-06
chr15	82980100	82980120	-	1.70193e-05
chr15	82980180	82980200	-	1.38243e-06
chr15	84505320	84505340	-	1.70193e-05
chr15	86025320	86025340	-	9.42825e-09
chr15	86295900	86295920	-	7.19457e-09
chr15	89481260	89481280	-	1.70193e-05
chr15	93064780	93064820	-	1.70193e-05
chr15	93064840	93064920	-	4.20296e-05
chr15	93064940	93065000	-	5.67789e-06
chr15	93263780	93263800	-	1.70193e-05
chr15	93301860	93301880	-	1.70193e-05
chr15	96550180	96550200	-	1.38243e-06
chr15	96755480	96755500	-	0.000166722
chr15	97715540	97715560	-	1.70193e-05
chr15	98851260	98851280	-	8.78392e-08
chr15	99225080	99225100	-	7.19457e-09
chr15	99492240	99492260	-	1.70193e-05
chr15	100135120	100135140	-	7.19457e-09
chr15	101141840	101141860	-	7.19457e-09
chr15	101201340	101201360	-	1.70193e-05
chr15	101665140	101665160	-	0.000166722
chr15	102055140	102055160	-	1.38243e-06
chr16	4893520	4893540	-	1.70193e-05
chr16	10289720	10289740	-	0.000166722
chr16	10832740	10832760	-	7.19457e-09
chr16	12784680	12784700	-	8.78392e-08
chr16	17222400	17222420	-	9.42825e-09
chr16	18360860	18360880	-	9.42825e-09
chr16	19464380	19464400	-	1.38243e-06
chr16	21175620	21175640	-	9.42825e-09
chr16	37132520	37132540	-	0.000166722
chr16	37883120	37883140	-	1.38243e-06
chr16	40487780	40487800	-	0.000166722
chr16	41043180	41043200	-	1.38243e-06
chr16	43182620	43182640	-	7.19457e-09
chr16	44142780	44142800	-	7.19457e-09
chr16	44144760	44144780	-	7.19457e-09
chr16	44278400	44278420	-	9.42825e-09
chr16	45753300	45753320	-	1.38243e-06
chr16	50082720	50082740	-	0.000166722
chr16	50370520	50370540	-	1.70193e-05
chr16	56241300	56241320	-	9.42825e-09
chr16	62522100	62522120	-	9.42825e-09
chr16	63589180	63589200	-	9.42825e-09
chr16	75434420	75434480	-	0.00011115
chr16	78226180	78226200	-	1.70193e-05
chr16	85303160	85303180	-	1.70193e-05
chr16	87703840	87703860	-	8.78392e-08
chr16	92571280	92571300	-	0.000166722
chr16	93686660	93686680	-	1.38243e-06
chr16	93686960	93686980	-	7.19457e-09
chr16	94622400	94622420	-	0.000166722
chr17	3379800	3379820	-	7.19457e-09
chr17	6273580	6273600	-	1.70193e-05
chr17	10523720	10523740	-	8.78392e-08
chr17	11634140	11634160	-	8.78392e-08
chr17	14492060	14492080	-	1.70193e-05
chr17	18116700	18116720	-	9.42825e-09
chr17	20533780	20533800	-	1.70193e-05
chr17	23014680	23014700	-	9.42825e-09
chr17	23670920	23670940	-	7.19457e-09
chr17	23677880	23677900	-	7.19457e-09
chr17	23684320	23684340	-	7.19457e-09
chr17	23892140	23892160	-	0.000166722
chr17	24155380	24155400	-	1.70193e-05
chr17	26012020	26012040	-	7.19457e-09
chr17	26307400	26307420	-	1.70193e-05
chr17	27711340	27711360	-	8.78392e-08
chr17	27876480	27876500	-	8.78392e-08
chr17	29316460	29316480	-	0.000166722
chr17	29895820	29895840	-	0.000166722
chr17	33895300	33895320	-	9.42825e-09
chr17	35760020	35760040	-	9.42825e-09
chr17	39979940	39979980	-	8.33644e-05
chr17	39980000	39980060	-	0.000111609
chr17	39980480	39980500	-	7.19457e-09
chr17	39980540	39980560	-	7.19457e-09
chr17	39980960	39980980	-	1.70193e-05
chr17	39981100	39981120	-	7.19457e-09
chr17	39981260	39981280	-	7.19457e-09
chr17	39981320	39981340	-	7.19457e-09
chr17	39981820	39981840	-	7.19457e-09
chr17	39982940	39982960	-	7.19457e-09
chr17	39983260	39983300	-	6.95931e-07
chr17	39983600	39983620	-	7.19457e-09
chr17	39985160	39985180	-	7.19457e-09
chr17	45904760	45904780	-	1.70193e-05
chr17	46910660	46910680	-	8.78392e-08
chr17	46989380	46989400	-	1.70193e-05
chr17	47300960	47300980	-	8.78392e-08
chr17	47985780	47985800	-	8.78392e-08
chr17	48673620	48673640	-	0.000166722
chr17	57119260	57119280	-	1.70193e-05
chr17	57211360	57211380	-	1.70193e-05
chr17	59208120	59208140	-	9.42825e-09
chr17	71973320	71973340	-	1.38243e-06
chr17	72103000	72103020	-	1.70193e-05
chr17	73725420	73725440	-	7.19457e-09
chr17	75147760	75147780	-	0.000166722
chr17	75986220	75986240	-	1.38243e-06
chr17	84261320	84261340	-	7.19457e-09
chr17	85516640	85516660	-	1.70193e-05
chr17	90969760	90969780	-	0.000166722
chr17	90982620	90982640	-	9.42825e-09
chr17	94471860	94471880	-	0.000166722
chr17	95065760	95065780	-	1.70193e-05
chr18	7191400	7191420	-	1.38243e-06
chr18	12348860	12348880	-	9.42825e-09
chr18	13146340	13146360	-	0.000166722
chr18	17049180	17049200	-	7.19457e-09
chr18	26065040	26065060	-	8.78392e-08
chr18	30394180	30394200	-	1.38243e-06
chr18	34533180	34533200	-	7.19457e-09
chr18	35023980	35024000	-	1.38243e-06
chr18	35185540	35185560	-	7.19457e-09
chr18	41356140	41356160	-	7.19457e-09
chr18	42563440	42563460	-	7.19457e-09
chr18	50321140	50321160	-	1.38243e-06
chr18	50481200	50481220	-	0.000166722
chr18	53358380	53358400	-	0.000166722
chr18	61048760	61048780	-	1.70193e-05
chr18	62055060	62055080	-	1.70193e-05
chr18	62748400	62748420	-	0.000166722
chr18	63729380	63729400	-	0.000166722
chr18	64984500	64984520	-	9.42825e-09
chr18	65587180	65587220	-	1.70193e-05
chr18	65587300	65587320	-	9.42825e-09
chr18	65587400	65587420	-	7.19457e-09
chr18	66267440	66267460	-	1.38243e-06
chr18	68519540	68519560	-	7.19457e-09
chr18	75852280	75852300	-	9.42825e-09
chr18	78359880	78359900	-	1.38243e-06
chr18	81454120	81454140	-	0.000166722
chr18	82656060	82656080	-	1.70193e-05
chr18	83640640	83640660	-	1.70193e-05
chr18	85169840	85169860	-	1.70193e-05
chr18	89140780	89140800	-	1.70193e-05
chr18	89484840	89484860	-	7.19457e-09
chr19	3527520	3527540	-	0.000166722
chr19	3576300	3576320	-	7.19457e-09
chr19	4630620	4630640	-	9.42825e-09
chr19	6367480	6367500	-	0.000166722
chr19	8968260	8968280	-	1.70193e-05
chr19	9590280	9590300	-	7.19457e-09
chr19	11394560	11394580	-	0.000166722
chr19	12076760	12076780	-	8.78392e-08
chr19	12080520	12080540	-	7.19457e-09
chr19	12080560	12080580	-	9.42825e-09
chr19	12086420	12086460	-	8.31141e-09
chr19	12086740	12086780	-	7.19457e-09
chr19	18743880	18743900	-	0.000166722
chr19	18807260	18807300	-	4.75169e-08
chr19	18807320	18807340	-	1.70193e-05
chr19	24748320	24748340	-	0.000166722
chr19	24850540	24850560	-	1.38243e-06
chr19	30585320	30585340	-	1.38243e-06
chr19	32955480	32955500	-	7.19457e-09
chr19	35700100	35700120	-	1.70193e-05
chr19	36280620	36280640	-	9.42825e-09
chr19	36320020	36320040	-	1.70193e-05
chr19	37022380	37022400	-	8.78392e-08
chr19	38901900	38901920	-	0.000166722
chr19	40232000	40232020	-	8.78392e-08
chr19	41529240	41529260	-	7.19457e-09
chr19	41819440	41819460	-	1.70193e-05
chr19	42411780	42411800	-	8.78392e-08
chr19	44103440	44103460	-	0.000166722
chr19	45824320	45824340	-	7.19457e-09
chr19	58296100	58296120	-	1.70193e-05
chr19	60441200	60441220	-	1.38243e-06
chr2	4305980	4306000	-	1.70193e-05
chr2	4887040	4887060	-	1.70193e-05
chr2	4962420	4962440	-	8.78392e-08
chr2	5852720	5852740	-	8.78392e-08
chr2	9674580	9674600	-	1.70193e-05
chr2	10018520	10018540	-	1.38243e-06
chr2	11935620	11935640	-	1.70193e-05
chr2	16604760	16604780	-	7.19457e-09
chr2	16604840	16604860	-	7.19457e-09
chr2	20821460	20821480	-	7.19457e-09
chr2	20821640	20821660	-	7.19457e-09
chr2	22443580	22443600	-	1.38243e-06
chr2	23678680	23678720	-	8.33644e-05
chr2	25565780	25565800	-	1.70193e-05
chr2	27940520	27940540	-	1.38243e-06
chr2	28289740	28289760	-	8.78392e-08
chr2	30194260	30194280	-	9.42825e-09
chr2	30290300	30290320	-	7.19457e-09
chr2	30690240	30690260	-	7.19457e-09
chr2	32461700	32461720	-	0.000166722
chr2	32738180	32738200	-	0.000166722
chr2	32818800	32818820	-	7.19457e-09
chr2	32818900	32818920	-	8.78392e-08
chr2	36086560	36086580	-	0.000166722
chr2	37414580	37414600	-	0.000166722
chr2	41520800	41520820	-	1.70193e-05
chr2	41669060	41669080	-	7.19457e-09
chr2	44968820	44968840	-	1.38243e-06
chr2	48665600	48665620	-	0.000166722
chr2	54362900	54362920	-	1.70193e-05
chr2	59190500	59190520	-	0.000166722
chr2	61128680	61128700	-	0.000166722
chr2	65642680	65642700	-	1.38243e-06
chr2	67007300	67007320	-	1.70193e-05
chr2	68681160	68681180	-	1.70193e-05
chr2	71719880	71719900	-	8.78392e-08
chr2	77242080	77242100	-	8.78392e-08
chr2	83849420	83849440	-	1.70193e-05
chr2	85168380	85168400	-	1.70193e-05
chr2	86707680	86707700	-	0.000166722
chr2	90035760	90035780	-	1.70193e-05
chr2	90492600	90492620	-	7.19457e-09
chr2	90752500	90752520	-	0.000166722
chr2	93119160	93119180	-	1.70193e-05
chr2	94217220	94217240	-	1.70193e-05
chr2	106039360	106039380	-	1.70193e-05
chr2	106663120	106663140	-	0.000166722
chr2	106862040	106862060	-	8.78392e-08
chr2	109780220	109780240	-	1.38243e-06
chr2	112049780	112049800	-	7.19457e-09
chr2	112083880	112083900	-	0.000166722
chr2	116944940	116944960	-	1.70193e-05
chr2	117043620	117043640	-	0.000166722
chr2	117074000	117074020	-	7.19457e-09
chr2	117074060	117074080	-	1.70193e-05
chr2	117074100	117074120	-	1.70193e-05
chr2	118268420	118268440	-	8.78392e-08
chr2	119066960	119066980	-	9.42825e-09
chr2	120829920	120829940	-	7.19457e-09
chr2	121811660	121811680	-	1.70193e-05
chr2	122203700	122203720	-	7.19457e-09
chr2	128081940	128081960	-	1.70193e-05
chr2	128630300	128630320	-	0.000166722
chr2	132834260	132834300	-	8.51435e-06
chr2	137223300	137223320	-	7.19457e-09
chr2	141466260	141466280	-	0.000166722
chr2	142002500	142002520	-	0.000166722
chr2	144125060	144125080	-	8.78392e-08
chr2	146484260	146484280	-	1.70193e-05
chr2	154325700	154325720	-	9.42825e-09
chr2	162787380	162787400	-	7.19457e-09
chr2	165641140	165641160	-	0.000166722
chr2	166013380	166013400	-	7.19457e-09
chr2	167087680	167087700	-	0.000166722
chr2	167227460	167227480	-	7.19457e-09
chr2	168816900	168816920	-	1.70193e-05
chr2	168961300	168961320	-	8.78392e-08
chr2	170113400	170113420	-	7.19457e-09
chr2	170369180	170369200	-	1.38243e-06
chr2	172877340	172877360	-	9.42825e-09
chr2	174472260	174472280	-	1.70193e-05
chr2	179676680	179676700	-	0.000166722
chr2	179917300	179917320	-	1.38243e-06
chr2	179971560	179971580	-	0.000166722
chr3	11166520	11166540	-	1.70193e-05
chr3	18781720	18781740	-	7.19457e-09
chr3	19460280	19460300	-	1.70193e-05
chr3	19460320	19460340	-	1.70193e-05
chr3	19528400	19528420	-	8.78392e-08
chr3	19528820	19528840	-	7.19457e-09
chr3	19986700	19986720	-	7.19457e-09
chr3	25305280	25305300	-	8.78392e-08
chr3	30500180	30500220	-	7.19457e-09
chr3	32707120	32707140	-	1.70193e-05
chr3	33027640	33027660	-	0.000166722
chr3	34598560	34598580	-	1.70193e-05
chr3	37380400	37380420	-	7.19457e-09
chr3	45100660	45100680	-	1.70193e-05
chr3	45787640	45787660	-	1.70193e-05
chr3	48758640	48758660	-	7.19457e-09
chr3	51162280	51162320	-	4.75169e-08
chr3	51163320	51163380	-	5.56056e-05
chr3	54638300	54638320	-	1.38243e-06
chr3	65274500	65274520	-	1.70193e-05
chr3	66401320	66401340	-	1.70193e-05
chr3	66859920	66859940	-	1.70193e-05
chr3	68409320	68409340	-	1.70193e-05
chr3	78487620	78487640	-	0.000166722
chr3	86041940	86041960	-	1.70193e-05
chr3	88395920	88395940	-	1.38243e-06
chr3	89142200	89142220	-	8.78392e-08
chr3	90516620	90516640	-	1.70193e-05
chr3	91790920	91790940	-	7.19457e-09
chr3	93927020	93927040	-	1.70193e-05
chr3	96050980	96051020	-	9.18705e-05
chr3	96072780	96072820	-	8.78392e-08
chr3	96132340	96132360	-	7.19457e-09
chr3	96132420	96132460	-	0.000166722
chr3	96136660	96136700	-	4.75169e-08
chr3	96150580	96150600	-	7.19457e-09
chr3	96150620	96150640	-	7.19457e-09
chr3	96177940	96177960	-	1.38243e-06
chr3	96178000	96178020	-	1.70193e-05
chr3	96178040	96178060	-	7.19457e-09
chr3	96186840	96186880	-	7.19457e-09
chr3	96213980	96214000	-	7.19457e-09
chr3	96226660	96226680	-	7.19457e-09
chr3	96226720	96226740	-	8.78392e-08
chr3	96239880	96239940	-	6.12494e-05
chr3	96245440	96245460	-	9.42825e-09
chr3	96254360	96254380	-	7.19457e-09
chr3	96254440	96254480	-	9.18705e-05
chr3	96255340	96255400	-	4.93234e-07
chr3	96256400	96256420	-	7.19457e-09
chr3	96283320	96283340	-	7.19457e-09
chr3	96292640	96292680	-	1.70193e-05
chr3	96292720	96292760	-	8.55356e-06
chr3	96301700	96301740	-	6.94814e-07
[truncated: 447 more rows]

## Sheet: C2C12 peaks
Supplementary Table S2. LACE-seq profiling of YTHDC1 binding in ASC and C2C12 myoblasts.
All YTHDC1 binding sites in C2C12.
Chromosome	Begin	End	Strand	P-value
chr1	3046000	3046020	+	0.000640612
chr1	4436240	4436260	+	6.9168e-05
chr1	4837040	4837060	+	0.000640612
chr1	4952000	4952040	+	0.00014398
chr1	6419360	6419380	+	0.000640612
chr1	7696700	7696720	+	0.000218793
chr1	7696940	7696960	+	0.000218793
chr1	7697660	7697680	+	1.70931e-06
chr1	7769680	7769700	+	0.000640612
chr1	7770460	7770480	+	0.000640612
chr1	8414800	8414840	+	0.000109635
chr1	8766640	8766660	+	1.70931e-06
chr1	9713680	9713700	+	2.08079e-05
chr1	9736760	9736780	+	0.000640612
chr1	9738040	9738060	+	4.76175e-07
chr1	9932560	9932600	+	3.75927e-05
chr1	9934920	9934940	+	0.000640612
chr1	10128700	10128720	+	0.000640612
chr1	11698120	11698160	+	0.000640612
chr1	11773280	11773300	+	0.000218793
chr1	13165080	13165100	+	6.9168e-05
chr1	13199980	13200000	+	0.000640612
chr1	13561940	13561960	+	0.000218793
chr1	13776060	13776080	+	9.0622e-09
chr1	15258720	15258740	+	1.70931e-06
chr1	15258980	15259000	+	4.76175e-07
chr1	16057840	16057860	+	5.93293e-10
chr1	16557960	16557980	+	0.000640612
chr1	16619840	16619860	+	2.08079e-05
chr1	17342140	17342160	+	3.59332e-11
chr1	17390760	17390780	+	0.000640612
chr1	18634560	18634580	+	0.000640612
chr1	18820800	18820820	+	0.000640612
chr1	19789340	19789360	+	6.9168e-05
chr1	20434920	20434940	+	6.01748e-06
chr1	20732760	20732780	+	2.33391e-09
chr1	20990480	20990500	+	6.01748e-06
chr1	20990800	20990820	+	2.08079e-05
chr1	21047860	21047900	+	0.000323315
chr1	21502820	21502840	+	0.000640612
chr1	24035160	24035180	+	2.08079e-05
chr1	24618400	24618460	+	0.000286627
chr1	24618540	24618560	+	2.08079e-05
chr1	24618580	24618600	+	6.9168e-05
chr1	24618660	24618700	+	0.00032116
chr1	24618760	24618780	+	9.0622e-09
chr1	24618800	24618840	+	0.000323315
chr1	24618900	24618920	+	1.70931e-06
chr1	24619000	24619080	+	0.000375431
chr1	24619100	24619160	+	0.000238599
chr1	24619200	24619220	+	1.70931e-06
chr1	24619260	24619280	+	6.01748e-06
chr1	24619300	24619360	+	0.000288474
chr1	24619420	24619440	+	1.29582e-07
chr1	24619480	24619520	+	0.000109398
chr1	24619540	24619560	+	2.08079e-05
chr1	24619880	24619900	+	0.000640612
chr1	24619980	24620000	+	6.9168e-05
chr1	24620040	24620060	+	6.01748e-06
chr1	24620120	24620160	+	3.54386e-05
chr1	24620180	24620240	+	0.000427644
chr1	24620260	24620280	+	4.76175e-07
chr1	24620340	24620440	+	0.00031504
chr1	24620460	24620520	+	1.58778e-05
chr1	24620620	24620680	+	2.50626e-05
chr1	24620700	24620800	+	0.00019108
chr1	24620820	24620880	+	7.13789e-06
chr1	24620940	24620960	+	4.76175e-07
chr1	24621000	24621020	+	3.45468e-08
chr1	24621080	24621120	+	0.00033071
chr1	24621140	24621240	+	6.18559e-05
chr1	24621280	24621300	+	1.29582e-07
chr1	24621320	24621420	+	0.000128188
chr1	24621440	24621480	+	0.00035489
chr1	24621520	24621540	+	8.57888e-12
chr1	24621680	24621700	+	3.45468e-08
chr1	24621780	24621840	+	3.19978e-05
chr1	24621880	24621920	+	0.00032116
chr1	24621960	24621980	+	6.9168e-05
chr1	24622040	24622060	+	0.000640612
chr1	24622100	24622120	+	6.01748e-06
chr1	24622140	24622180	+	0.000323315
chr1	24622260	24622300	+	0.000110251
chr1	24622380	24622400	+	6.9168e-05
chr1	24622560	24622620	+	7.66447e-06
chr1	24622640	24622660	+	3.45468e-08
chr1	24622680	24622700	+	1.70931e-06
chr1	24622720	24622740	+	6.01748e-06
chr1	24622760	24622800	+	3.24683e-06
chr1	24622860	24622880	+	1.70931e-06
chr1	24622920	24623000	+	3.46164e-05
chr1	24811280	24811300	+	0.000640612
chr1	25443760	25443780	+	6.9168e-05
chr1	28321800	28321820	+	0.000218793
chr1	29799820	29799840	+	1.70931e-06
chr1	29987060	29987080	+	2.08079e-05
chr1	30860540	30860560	+	0.000640612
chr1	30887040	30887060	+	0.000640612
chr1	32057760	32057780	+	0.000640612
chr1	32180380	32180400	+	0.000218793
chr1	32576640	32576660	+	0.000218793
chr1	32602280	32602300	+	6.9168e-05
chr1	33803620	33803640	+	0.000218793
chr1	33833200	33833220	+	0.000640612
chr1	33848880	33848920	+	0.00033071
chr1	33850120	33850140	+	0.000218793
chr1	33852040	33852060	+	6.9168e-05
chr1	33855380	33855400	+	4.76175e-07
chr1	33858660	33858680	+	2.08079e-05
chr1	33859320	33859340	+	0.000218793
chr1	33859960	33859980	+	0.000218793
chr1	33860120	33860140	+	0.000218793
chr1	33860180	33860200	+	6.9168e-05
chr1	34038260	34038280	+	2.08079e-05
chr1	34051800	34051820	+	0.000640612
chr1	34491660	34491720	+	7.498e-05
chr1	34870660	34870700	+	0.000429702
chr1	34873840	34873860	+	1.70931e-06
chr1	34885640	34885660	+	1.70931e-06
chr1	35305160	35305180	+	6.9168e-05
chr1	36385240	36385260	+	6.9168e-05
chr1	36394060	36394080	+	0.000218793
chr1	36394460	36394480	+	6.9168e-05
chr1	36605600	36605620	+	0.000218793
chr1	36605800	36605820	+	0.000218793
chr1	36606140	36606160	+	0.000640612
chr1	36606380	36606420	+	0.000640612
chr1	36606560	36606580	+	0.000640612
chr1	36606800	36606820	+	6.9168e-05
chr1	36606840	36606860	+	0.000640612
chr1	36606900	36606940	+	4.4988e-05
chr1	36610560	36610580	+	2.08079e-05
chr1	36756580	36756600	+	6.9168e-05
chr1	36844960	36844980	+	0.000640612
chr1	36981320	36981340	+	0.000640612
chr1	36996240	36996260	+	0.000218793
chr1	37014900	37014920	+	6.01748e-06
chr1	37520020	37520040	+	2.08079e-05
chr1	37595900	37595920	+	0.000640612
chr1	38167880	38167900	+	0.000640612
chr1	38746340	38746360	+	2.08079e-05
chr1	39351640	39351660	+	2.08079e-05
chr1	39600900	39600920	+	0.000218793
chr1	39605620	39605640	+	1.70931e-06
chr1	40611240	40611260	+	0.000640612
chr1	40655440	40655460	+	0.000640612
chr1	42703020	42703060	+	0.000429702
chr1	42704480	42704500	+	0.000640612
chr1	43198580	43198600	+	1.70931e-06
chr1	43361000	43361020	+	2.08079e-05
chr1	44000360	44000400	+	3.45843e-05
chr1	44520840	44520860	+	0.000218793
chr1	44637420	44637440	+	2.08079e-05
chr1	44918280	44918300	+	0.000218793
chr1	45435160	45435180	+	0.000218793
chr1	45446280	45446300	+	0.000218793
chr1	45463140	45463160	+	0.000640612
chr1	45475340	45475360	+	1.70931e-06
chr1	45559880	45559900	+	2.08079e-05
chr1	45914120	45914140	+	0.000640612
chr1	46039200	46039220	+	6.01748e-06
chr1	46691780	46691800	+	0.000218793
chr1	47081740	47081760	+	0.000640612
chr1	47338500	47338520	+	1.70931e-06
chr1	48519080	48519120	+	3.14613e-10
chr1	51535080	51535100	+	0.000218793
chr1	51807980	51808000	+	0.000640612
chr1	51995820	51995840	+	0.000218793
chr1	51997580	51997600	+	0.000640612
chr1	52289260	52289280	+	6.9168e-05
chr1	53750060	53750080	+	6.9168e-05
chr1	53750440	53750480	+	0.0001198
chr1	53750940	53750960	+	0.000218793
chr1	53751180	53751200	+	1.70931e-06
chr1	53751380	53751400	+	2.08079e-05
chr1	53775680	53775700	+	6.9168e-05
chr1	54152760	54152780	+	2.33391e-09
chr1	54306020	54306040	+	1.70931e-06
chr1	54326300	54326320	+	2.08079e-05
chr1	55073300	55073320	+	0.000640612
chr1	55082020	55082040	+	1.70931e-06
chr1	55143700	55143720	+	0.000218793
chr1	55531000	55531020	+	6.9168e-05
chr1	56766860	56766880	+	0.000640612
chr1	57071000	57071020	+	0.000640612
chr1	57280380	57280400	+	8.57888e-12
chr1	58293060	58293080	+	0.000640612
chr1	58310180	58310200	+	0.000218793
chr1	58670780	58670800	+	0.000640612
chr1	58929280	58929300	+	0.000218793
chr1	59591020	59591040	+	0.000640612
chr1	60543820	60543840	+	6.01748e-06
chr1	60544600	60544620	+	2.08079e-05
chr1	60544780	60544800	+	2.08079e-05
chr1	60544960	60544980	+	0.000640612
chr1	60545720	60545740	+	0.000640612
chr1	60546180	60546200	+	6.9168e-05
chr1	60582740	60582760	+	0.000640612
chr1	60902480	60902500	+	6.9168e-05
chr1	63094900	63094920	+	0.000640612
chr1	63102380	63102400	+	0.000218793
chr1	63105100	63105140	+	0.00035489
chr1	63105620	63105640	+	2.08079e-05
chr1	63132820	63132840	+	6.01748e-06
chr1	63238620	63238640	+	0.000640612
chr1	63390200	63390220	+	0.000640612
chr1	63411260	63411280	+	0.000218793
chr1	63739700	63739720	+	0.000218793
chr1	64076560	64076580	+	6.01748e-06
chr1	64125560	64125580	+	0.000640612
chr1	64125620	64125640	+	0.000218793
chr1	64125660	64125700	+	0.00033071
chr1	64125880	64125900	+	2.08079e-05
chr1	64167480	64167500	+	0.000218793
chr1	64167640	64167660	+	0.000218793
chr1	64167740	64167760	+	0.000218793
chr1	64167920	64167940	+	0.000640612
chr1	64655260	64655280	+	0.000640612
chr1	64910400	64910420	+	6.9168e-05
chr1	64984360	64984380	+	0.000218793
chr1	65040640	65040680	+	0.000640612
chr1	65551600	65551620	+	0.000218793
chr1	66823680	66823700	+	0.000640612
chr1	66848060	66848080	+	0.000218793
chr1	66951120	66951140	+	0.000218793
chr1	66995280	66995300	+	0.000218793
chr1	67650380	67650400	+	2.33391e-09
chr1	70114360	70114380	+	6.01748e-06
chr1	70393680	70393700	+	0.000640612
chr1	71381760	71381780	+	2.08079e-05
chr1	71632120	71632140	+	0.000640612
chr1	71632180	71632200	+	0.000640612
chr1	71632280	71632300	+	6.01748e-06
chr1	71632360	71632380	+	1.70931e-06
chr1	71632400	71632420	+	6.9168e-05
chr1	71632540	71632560	+	1.29582e-07
chr1	71632600	71632620	+	0.000640612
chr1	71632640	71632660	+	4.76175e-07
chr1	71632680	71632700	+	4.76175e-07
chr1	71632740	71632800	+	0.000288474
chr1	71632820	71632840	+	2.08079e-05
chr1	71633420	71633500	+	0.000180454
chr1	71636680	71636700	+	0.000218793
chr1	71637360	71637380	+	4.76175e-07
chr1	71638280	71638300	+	4.76175e-07
chr1	71639660	71639680	+	2.08079e-05
chr1	71639760	71639800	+	0.000109635
chr1	71642300	71642340	+	0.00035489
chr1	71643860	71643880	+	3.45468e-08
chr1	71643900	71643920	+	4.76175e-07
chr1	71643940	71643960	+	6.01748e-06
chr1	71643980	71644020	+	0.00033071
chr1	71644040	71644100	+	2.61879e-06
chr1	71644160	71644180	+	0.000218793
chr1	71644200	71644220	+	6.9168e-05
chr1	71644260	71644300	+	0.00014398
chr1	71644980	71645020	+	0.000320544
chr1	71645920	71645960	+	0.0001198
chr1	71646180	71646200	+	1.29582e-07
chr1	71646220	71646260	+	0.0001198
chr1	71646900	71646940	+	0.00035489
chr1	71647800	71647840	+	0.000320371
chr1	71648940	71649020	+	0.000196241
chr1	71649040	71649080	+	0.000320371
chr1	71649100	71649120	+	6.9168e-05
chr1	71649480	71649520	+	0.000110251
chr1	71649580	71649600	+	0.000218793
chr1	71650380	71650400	+	1.29582e-07
chr1	71651460	71651480	+	0.000640612
chr1	71651600	71651620	+	2.08079e-05
chr1	71652480	71652540	+	0.000215586
chr1	71652580	71652600	+	6.01748e-06
chr1	71653280	71653340	+	0.000259649
chr1	71653380	71653420	+	9.19444e-07
chr1	71654500	71654520	+	0.000640612
chr1	71654540	71654560	+	6.9168e-05
chr1	71655980	71656000	+	0.000640612
chr1	71656120	71656180	+	9.79928e-05
chr1	71657500	71657520	+	0.000218793
chr1	71657560	71657580	+	0.000218793
chr1	71659040	71659080	+	0.0001198
chr1	71659120	71659180	+	9.79928e-05
chr1	71659200	71659220	+	0.000640612
chr1	71660520	71660540	+	1.70931e-06
chr1	71661940	71661960	+	1.70931e-06
chr1	71661980	71662000	+	0.000218793
chr1	71662040	71662060	+	6.9168e-05
chr1	71665160	71665220	+	0.000213739
chr1	71665980	71666020	+	0.000323315
chr1	71666060	71666080	+	6.9168e-05
chr1	71666100	71666120	+	0.000218793
chr1	71667300	71667320	+	0.000218793
chr1	71667340	71667380	+	0.000109401
chr1	71670700	71670760	+	0.000288474
chr1	71670780	71670800	+	0.000640612
chr1	71672560	71672600	+	4.4988e-05
chr1	71672640	71672680	+	3.02601e-06
chr1	71672760	71672800	+	3.48221e-05
chr1	71673780	71673820	+	2.08079e-05
chr1	71673840	71673900	+	0.000238599
chr1	71674680	71674700	+	1.29582e-07
chr1	71674980	71675000	+	4.76175e-07
chr1	71675080	71675100	+	4.76175e-07
chr1	71675920	71675980	+	9.65568e-05
chr1	71676020	71676040	+	0.000218793
chr1	71676260	71676320	+	0.000237163
chr1	71678620	71678680	+	0.000286627
chr1	71682760	71682780	+	6.9168e-05
chr1	71683820	71683880	+	3.19978e-05
chr1	71683900	71683920	+	6.01748e-06
chr1	71685040	71685100	+	0.00045013
chr1	71686920	71686940	+	1.70931e-06
chr1	71687740	71687760	+	2.08079e-05
chr1	71687780	71687860	+	1.88056e-05
chr1	71688520	71688540	+	2.33391e-09
chr1	71688560	71688660	+	0.000259405
chr1	71688680	71688700	+	0.000640612
chr1	71689540	71689580	+	0.00033071
chr1	71689600	71689660	+	0.000243529
chr1	71692180	71692200	+	2.08079e-05
chr1	71694580	71694600	+	1.29582e-07
chr1	71695860	71695880	+	2.08079e-05
chr1	71699460	71699480	+	0.000640612
chr1	71699620	71699680	+	9.65568e-05
chr1	71745240	71745260	+	6.9168e-05
chr1	71916680	71916700	+	0.000218793
chr1	72215060	72215080	+	2.08079e-05
chr1	72904820	72904840	+	3.45468e-08
chr1	72905000	72905080	+	0.0003428
chr1	72905120	72905160	+	0.00033071
chr1	72905220	72905260	+	0.000320371
chr1	72905500	72905560	+	0.000359399
chr1	72905600	72905620	+	0.000640612
chr1	72905680	72905700	+	0.000640612
chr1	72905740	72905780	+	4.4988e-05
chr1	72905820	72905860	+	0.00014398
chr1	72905900	72905960	+	0.000259649
chr1	72906000	72906020	+	2.08079e-05
chr1	72906200	72906220	+	0.000640612
chr1	72906240	72906260	+	2.33391e-09
chr1	72906320	72906340	+	2.08079e-05
chr1	72906400	72906420	+	4.76175e-07
chr1	72906440	72906460	+	0.000640612
chr1	72906480	72906520	+	0.000323315
chr1	72906600	72906620	+	6.9168e-05
chr1	72906720	72906760	+	4.4988e-05
chr1	72906840	72906860	+	3.45468e-08
chr1	72906900	72906920	+	4.76175e-07
chr1	72907020	72907080	+	0.000427644
chr1	72907120	72907140	+	0.000640612
chr1	72907380	72907400	+	1.70931e-06
chr1	72907560	72907580	+	9.0622e-09
chr1	72907620	72907660	+	3.54386e-05
chr1	72907700	72907740	+	1.04688e-05
chr1	72907760	72907800	+	0.00014398
chr1	72907860	72907900	+	6.93222e-08
chr1	72907920	72907940	+	0.000218793
chr1	72908140	72908160	+	5.93293e-10
chr1	72908380	72908460	+	0.000114607
chr1	72908520	72908580	+	7.35123e-05
chr1	72908860	72908900	+	0.00035489
chr1	72908920	72908940	+	6.01748e-06
chr1	72908960	72909000	+	0.00033071
chr1	72910560	72910580	+	2.08079e-05
chr1	72918660	72918680	+	0.000640612
chr1	72920460	72920480	+	0.000640612
chr1	72920660	72920680	+	0.000218793
chr1	72920720	72920760	+	1.70931e-06
chr1	72920800	72920820	+	0.000218793
chr1	72920840	72920860	+	2.08079e-05
chr1	72920900	72920920	+	0.000218793
chr1	72920960	72920980	+	0.000640612
chr1	72921120	72921160	+	0.0001198
chr1	72921180	72921220	+	0.0001198
chr1	72921320	72921360	+	0.000320544
chr1	73957180	73957200	+	0.000218793
chr1	73957960	73957980	+	1.70931e-06
chr1	73958920	73958940	+	6.9168e-05
chr1	73959300	73959340	+	9.19444e-07
chr1	73960000	73960040	+	0.000429702
chr1	73960220	73960240	+	0.000218793
chr1	73960300	73960320	+	2.08079e-05
chr1	73960580	73960600	+	6.01748e-06
chr1	73960700	73960720	+	6.9168e-05
chr1	73960800	73960820	+	0.000218793
chr1	73971640	73971660	+	6.9168e-05
chr1	73972180	73972200	+	6.01748e-06
chr1	73988520	73988540	+	0.000640612
chr1	73999100	73999120	+	0.000218793
chr1	73999240	73999260	+	0.000640612
chr1	73999320	73999340	+	6.9168e-05
chr1	73999360	73999380	+	0.000640612
chr1	73999500	73999520	+	1.70931e-06
chr1	74000140	74000160	+	0.000218793
chr1	74000300	74000320	+	0.000640612
chr1	74032460	74032480	+	0.000640612
chr1	74037340	74037360	+	0.000218793
chr1	74041840	74041860	+	6.9168e-05
chr1	74061520	74061540	+	0.000640612
chr1	74863320	74863380	+	2.32177e-05
chr1	74910600	74910620	+	2.08079e-05
chr1	75473960	75473980	+	0.000218793
chr1	75474040	75474060	+	4.76175e-07
chr1	78202180	78202200	+	0.000640612
chr1	78664540	78664560	+	2.08079e-05
chr1	79613980	79614000	+	0.000640612
chr1	80338440	80338460	+	0.000640612
chr1	81738400	81738420	+	0.000640612
chr1	81968580	81968600	+	0.000640612
chr1	82230720	82230740	+	0.000218793
chr1	82232080	82232100	+	6.01748e-06
chr1	82233820	82233840	+	1.70931e-06
chr1	82233980	82234000	+	4.76175e-07
chr1	82234100	82234120	+	0.000218793
chr1	82261160	82261180	+	2.08079e-05
chr1	82263380	82263400	+	0.000640612
chr1	82283240	82283260	+	0.000640612
chr1	82283480	82283520	+	0.00035489
chr1	82283780	82283800	+	0.000640612
chr1	82283920	82283940	+	0.000218793
chr1	82283960	82283980	+	0.000218793
chr1	82284080	82284100	+	0.000218793
chr1	82284320	82284340	+	2.08079e-05
chr1	82284540	82284560	+	6.9168e-05
chr1	82284640	82284680	+	3.46013e-05
chr1	82284820	82284840	+	0.000640612
chr1	82284880	82284900	+	0.000218793
chr1	82285320	82285360	+	0.000640612
chr1	82285900	82285920	+	0.000640612
chr1	82285940	82285960	+	0.000218793
chr1	82286040	82286100	+	0.000238599
chr1	82286160	82286200	+	0.000109401
chr1	82286460	82286480	+	6.01748e-06
chr1	82286740	82286780	+	0.00033071
chr1	82286800	82286820	+	2.08079e-05
chr1	82287020	82287060	+	0.0001198
chr1	82287180	82287200	+	6.9168e-05
chr1	82287280	82287300	+	6.01748e-06
chr1	82287320	82287340	+	0.000640612
chr1	82287400	82287420	+	6.01748e-06
chr1	83175360	83175380	+	0.000640612
chr1	83232280	83232300	+	3.59332e-11
chr1	83739600	83739620	+	0.000640612
chr1	83778600	83778620	+	0.000640612
chr1	84790180	84790200	+	9.0622e-09
chr1	84794140	84794160	+	0.000640612
chr1	84806200	84806220	+	6.9168e-05
chr1	84816440	84816460	+	6.01748e-06
chr1	87409740	87409760	+	1.70931e-06
chr1	87473140	87473160	+	0.000640612
chr1	87539180	87539200	+	1.70931e-06
chr1	88014900	88014920	+	0.000640612
chr1	88130100	88130120	+	0.000640612
chr1	88247160	88247180	+	0.000640612
chr1	88469620	88469640	+	0.000218793
chr1	88805700	88805720	+	4.76175e-07
chr1	88806040	88806060	+	6.01748e-06
chr1	88973140	88973180	+	1.04688e-05
chr1	88973200	88973220	+	0.000218793
chr1	88973640	88973660	+	6.9168e-05
chr1	88973880	88973900	+	9.0622e-09
chr1	88973920	88973940	+	0.000640612
chr1	88974080	88974100	+	4.76175e-07
chr1	88974200	88974220	+	1.29582e-07
chr1	88975300	88975320	+	1.29582e-07
chr1	89317720	89317740	+	2.33391e-09
chr1	89481160	89481180	+	0.000218793
chr1	89842180	89842200	+	0.000218793
chr1	90159980	90160000	+	6.9168e-05
chr1	90160020	90160040	+	6.9168e-05
chr1	90160480	90160500	+	3.45468e-08
chr1	90160600	90160620	+	2.08079e-05
chr1	90160940	90160960	+	2.08079e-05
chr1	90161040	90161060	+	3.45468e-08
chr1	90161180	90161200	+	1.70931e-06
chr1	90161480	90161500	+	0.000218793
chr1	90161560	90161580	+	0.000218793
chr1	90161600	90161620	+	2.08079e-05
chr1	90161900	90161920	+	0.000640612
chr1	90162200	90162220	+	6.9168e-05
chr1	90162440	90162460	+	2.08079e-05
chr1	90162560	90162580	+	6.01748e-06
chr1	90162740	90162760	+	6.9168e-05
chr1	90162960	90162980	+	2.08079e-05
chr1	90163040	90163080	+	0.000429702
chr1	90163100	90163120	+	0.000218793
chr1	90171360	90171380	+	6.01748e-06
chr1	90595680	90595700	+	2.08079e-05
chr1	90596820	90596860	+	4.4988e-05
chr1	90596960	90597000	+	0.000429702
chr1	90597180	90597200	+	6.9168e-05
chr1	90597440	90597460	+	0.000218793
chr1	90597820	90597840	+	0.000640612
chr1	90598020	90598040	+	5.93293e-10
chr1	90598400	90598420	+	0.000218793
chr1	90598480	90598500	+	6.9168e-05
chr1	91883520	91883540	+	2.33391e-09
chr1	92406680	92406700	+	0.000218793
chr1	92499020	92499040	+	0.000640612
chr1	92663600	92663620	+	0.000640612
chr1	92663800	92663860	+	0.000309524
chr1	92663940	92663960	+	1.29582e-07
chr1	92664000	92664020	+	0.000218793
chr1	92664120	92664140	+	6.9168e-05
chr1	92669580	92669600	+	2.08079e-05
chr1	92670120	92670160	+	0.000323315
chr1	92672160	92672200	+	0.000218793
chr1	92672280	92672300	+	0.000640612
chr1	92672340	92672360	+	4.76175e-07
chr1	92672400	92672420	+	1.70931e-06
chr1	92672460	92672500	+	0.00033071
chr1	92672520	92672560	+	1.09274e-06
chr1	92672620	92672640	+	6.9168e-05
chr1	92672720	92672740	+	0.000218793
chr1	92674080	92674100	+	6.9168e-05
chr1	92675360	92675380	+	0.000640612
chr1	92676560	92676580	+	0.000218793
chr1	92676620	92676640	+	2.08079e-05
chr1	92678460	92678480	+	2.08079e-05
chr1	92694620	92694660	+	0.000218793
chr1	92697880	92697900	+	0.000218793
chr1	92698620	92698640	+	0.000640612
chr1	92700580	92700600	+	0.000640612
chr1	92700760	92700780	+	0.000218793
chr1	92704500	92704520	+	9.0622e-09
chr1	92706820	92706840	+	6.01748e-06
chr1	92706940	92706980	+	0.000429702
chr1	92707900	92707920	+	0.000640612
chr1	92708280	92708300	+	0.000640612
chr1	92709700	92709740	+	3.48221e-05
chr1	92709880	92709900	+	6.9168e-05
chr1	92710060	92710080	+	1.29582e-07
chr1	92710480	92710500	+	2.33391e-09
chr1	92710580	92710620	+	0.000640612
chr1	92710720	92710740	+	4.76175e-07
chr1	92712300	92712320	+	0.000640612
chr1	92712540	92712560	+	6.01748e-06
chr1	92712580	92712600	+	2.08079e-05
chr1	92712640	92712700	+	9.51157e-06
chr1	92712800	92712840	+	0.000429702
chr1	92712940	92712960	+	2.08079e-05
chr1	92713040	92713060	+	6.9168e-05
chr1	92713140	92713160	+	6.9168e-05
chr1	92713520	92713540	+	0.000218793
chr1	92713960	92713980	+	6.01748e-06
chr1	92726720	92726760	+	0.00033071
chr1	93086760	93086780	+	0.000218793
chr1	93167860	93167880	+	0.000218793
chr1	93828000	93828020	+	6.01748e-06
chr1	93829240	93829260	+	0.000218793
chr1	93829760	93829780	+	0.000640612
chr1	93999220	93999240	+	0.000218793
chr1	94015520	94015540	+	6.9168e-05
chr1	94021560	94021580	+	0.000640612
chr1	94033200	94033220	+	0.000640612
chr1	94039980	94040000	+	6.9168e-05
chr1	95310140	95310160	+	0.000640612
chr1	95318520	95318540	+	0.000218793
chr1	95526380	95526400	+	0.000640612
chr1	95608920	95608940	+	0.000218793
chr1	95696100	95696140	+	3.75927e-05
chr1	95696480	95696500	+	6.9168e-05
chr1	96451360	96451380	+	6.9168e-05
chr1	97095720	97095740	+	0.000640612
chr1	97727500	97727520	+	0.000218793
chr1	97727700	97727720	+	0.000640612
chr1	97728780	97728800	+	4.76175e-07
chr1	99872420	99872440	+	0.000640612
chr1	99955040	99955060	+	0.000640612
chr1	100026380	100026400	+	0.000218793
chr1	103583120	103583140	+	0.000640612
chr1	104687680	104687700	+	0.000640612
chr1	106838360	106838380	+	0.000640612
chr1	108609120	108609160	+	0.00014398
chr1	108609620	108609640	+	1.70931e-06
chr1	108610340	108610360	+	6.01748e-06
chr1	108610760	108610780	+	0.000218793
chr1	108620920	108620940	+	6.9168e-05
chr1	108689140	108689160	+	2.08079e-05
chr1	108712320	108712340	+	6.9168e-05
chr1	109653200	109653220	+	2.33391e-09
chr1	109653260	109653280	+	6.9168e-05
chr1	110275140	110275160	+	0.000218793
chr1	110750540	110750560	+	1.29582e-07
chr1	112084780	112084800	+	0.000640612
chr1	112387620	112387640	+	0.000218793
chr1	113756380	113756400	+	6.01748e-06
chr1	113756780	113756820	+	0.000218793
chr1	113777380	113777400	+	6.01748e-06
chr1	113837580	113837620	+	0.00014398
chr1	114126220	114126240	+	0.000640612
chr1	114131160	114131180	+	1.29582e-07
chr1	114133280	114133300	+	1.29582e-07
chr1	114135400	114135420	+	1.70931e-06
chr1	115026820	115026840	+	0.000640612
chr1	115635740	115635760	+	0.000640612
chr1	116079820	116079840	+	6.9168e-05
chr1	120355800	120355820	+	0.000640612
chr1	121313960	121313980	+	6.9168e-05
chr1	121684260	121684280	+	0.000640612
chr1	121735220	121735240	+	0.000640612
chr1	121964420	121964440	+	0.000640612
chr1	122124420	122124440	+	0.000640612
chr1	123201400	123201420	+	2.08079e-05
chr1	125585640	125585660	+	6.01748e-06
chr1	125889560	125889580	+	0.000640612
chr1	126581620	126581640	+	2.08079e-05
chr1	127290020	127290040	+	6.9168e-05
chr1	127291640	127291680	+	0.00033071
chr1	127294020	127294040	+	0.000640612
chr1	127480080	127480100	+	0.000218793
chr1	129178120	129178140	+	0.000218793
chr1	129351540	129351560	+	0.000640612
chr1	130285720	130285740	+	0.000640612
chr1	130416660	130416680	+	4.76175e-07
chr1	130416920	130416940	+	6.9168e-05
chr1	130417000	130417020	+	0.000640612
chr1	130417220	130417240	+	1.70931e-06
chr1	130417380	130417420	+	0.000429702
chr1	130417600	130417620	+	6.01748e-06
chr1	130417780	130417800	+	2.08079e-05
chr1	130417840	130417860	+	4.76175e-07
chr1	130485540	130485560	+	2.08079e-05
chr1	130485880	130485900	+	2.08079e-05
chr1	130691560	130691580	+	0.000218793
chr1	132128120	132128140	+	6.01748e-06
chr1	132492180	132492200	+	6.9168e-05
chr1	132587480	132587500	+	0.000640612
chr1	132981480	132981500	+	0.000218793
chr1	133192520	133192540	+	6.9168e-05
chr1	134010320	134010340	+	0.000640612
chr1	134051200	134051220	+	0.000640612
chr1	134067840	134067860	+	0.000218793
chr1	134180200	134180220	+	0.000640612
chr1	134181020	134181040	+	6.9168e-05
chr1	134277520	134277540	+	1.70931e-06
chr1	134883760	134883780	+	0.000640612
chr1	134883840	134883860	+	0.000640612
chr1	134884500	134884520	+	6.9168e-05
chr1	134885520	134885540	+	2.08079e-05
chr1	134903440	134903460	+	0.000640612
chr1	134903760	134903780	+	0.000640612
chr1	134904240	134904280	+	0.000640612
chr1	134905340	134905360	+	0.000218793
chr1	134918940	134918960	+	0.000218793
chr1	134930900	134930920	+	4.76175e-07
chr1	134930940	134930960	+	5.93293e-10
chr1	135005820	135005840	+	0.000640612
chr1	135074020	135074040	+	2.08079e-05
chr1	135517500	135517520	+	0.000640612
chr1	135519660	135519680	+	0.000640612
chr1	135521200	135521220	+	0.000640612
chr1	135535420	135535440	+	0.000640612
chr1	135542380	135542400	+	2.33391e-09
chr1	135543940	135543960	+	2.08079e-05
chr1	135550780	135550800	+	0.000640612
chr1	135551440	135551460	+	1.70931e-06
chr1	135551480	135551500	+	0.000218793
chr1	135551520	135551540	+	6.9168e-05
chr1	135552200	135552220	+	0.000218793
chr1	135553060	135553100	+	0.00014398
chr1	135553460	135553480	+	4.76175e-07
chr1	135553600	135553620	+	0.000218793
chr1	135554000	135554020	+	1.70931e-06
chr1	135554100	135554120	+	1.70931e-06
chr1	135554160	135554180	+	2.08079e-05
chr1	135554280	135554300	+	3.45468e-08
chr1	135554500	135554520	+	2.08079e-05
chr1	135554620	135554660	+	0.00033071
chr1	135554780	135554800	+	0.000640612
chr1	135554820	135554840	+	0.000218793
chr1	135555100	135555140	+	0.000112405
chr1	135555320	135555340	+	6.9168e-05
chr1	135555380	135555400	+	6.9168e-05
chr1	135555520	135555560	+	2.08079e-05
chr1	135555660	135555680	+	5.93293e-10
chr1	135555780	135555800	+	6.9168e-05
chr1	135556100	135556120	+	1.70931e-06
chr1	135556180	135556200	+	1.29582e-07
chr1	135556220	135556240	+	6.9168e-05
chr1	135556300	135556340	+	0.000112405
chr1	135556420	135556460	+	0.00014398
chr1	135556740	135556760	+	4.76175e-07
chr1	135557040	135557060	+	2.08079e-05
chr1	135557240	135557260	+	0.000640612
chr1	135557340	135557400	+	0.000222479
chr1	135557540	135557560	+	0.000640612
chr1	135557620	135557640	+	0.000640612
chr1	135557680	135557700	+	6.01748e-06
chr1	135602420	135602440	+	6.01748e-06
chr1	135603220	135603240	+	0.000640612
chr1	135614460	135614480	+	0.000640612
chr1	135650060	135650080	+	6.01748e-06
chr1	135972060	135972080	+	6.9168e-05
chr1	135973300	135973320	+	0.000640612
chr1	135973380	135973400	+	0.000218793
chr1	135973480	135973520	+	0.000323315
chr1	135973700	135973720	+	0.000640612
chr1	135973860	135973880	+	0.000218793
chr1	135973960	135973980	+	6.9168e-05
chr1	135974100	135974140	+	0.00035489
chr1	136412180	136412200	+	0.000640612
chr1	137203280	137203300	+	0.000640612
chr1	137207220	137207240	+	0.000640612
chr1	137281820	137281840	+	0.000218793
chr1	137290860	137290880	+	6.9168e-05
chr1	137331900	137331920	+	0.000640612
chr1	137335320	137335340	+	6.9168e-05
chr1	137335480	137335500	+	0.000640612
chr1	137336780	137336800	+	1.70931e-06
chr1	137342680	137342700	+	0.000218793
chr1	137399060	137399080	+	0.000640612
chr1	137429260	137429280	+	0.000218793
chr1	137476580	137476600	+	0.000640612
chr1	137486860	137486880	+	0.000640612
chr1	137532940	137532960	+	0.000218793
chr1	137556300	137556320	+	1.70931e-06
chr1	137566580	137566600	+	2.08079e-05
chr1	137583060	137583080	+	0.000640612
chr1	138167380	138167400	+	6.9168e-05
chr1	138199400	138199420	+	0.000640612
chr1	138543060	138543080	+	0.000218793
chr1	138685760	138685780	+	6.01748e-06
chr1	138686060	138686080	+	0.000218793
chr1	139739420	139739440	+	0.000640612
chr1	140888280	140888320	+	1.09274e-06
chr1	140908760	140908780	+	0.000640612
chr1	143648040	143648060	+	0.000640612
chr1	143965240	143965260	+	2.08079e-05
chr1	144990760	144990780	+	6.9168e-05
chr1	146070580	146070600	+	0.000640612
chr1	146071920	146071940	+	2.08079e-05
chr1	146456180	146456220	+	1.34127e-05
chr1	149529680	149529700	+	1.70931e-06
chr1	150425360	150425380	+	1.70931e-06
chr1	150870560	150870580	+	0.000640612
chr1	151928900	151928920	+	0.000640612
chr1	152909160	152909180	+	1.29582e-07
chr1	152909200	152909220	+	2.08079e-05
chr1	153091400	153091420	+	0.000640612
chr1	153174180	153174200	+	6.9168e-05
chr1	153505500	153505520	+	2.08079e-05
chr1	153702040	153702060	+	6.01748e-06
chr1	154796800	154796820	+	2.08079e-05
chr1	154797140	154797160	+	0.000218793
chr1	155066900	155066960	+	0.000640612
chr1	155067420	155067440	+	6.01748e-06
chr1	155068160	155068180	+	2.08079e-05
chr1	155068480	155068500	+	0.000218793
chr1	155089820	155089840	+	6.9168e-05
chr1	155090440	155090460	+	0.000640612
chr1	155109540	155109580	+	0.000429702
chr1	155179380	155179400	+	0.000640612
chr1	155179740	155179760	+	1.70931e-06
chr1	155320340	155320360	+	1.70931e-06
chr1	155334740	155334760	+	2.08079e-05
chr1	155456480	155456500	+	0.000640612
chr1	156945040	156945060	+	1.70931e-06
chr1	156945860	156945880	+	4.76175e-07
chr1	156945900	156945920	+	1.70931e-06
chr1	156945960	156945980	+	6.9168e-05
chr1	156946000	156946020	+	2.08079e-05
chr1	156946180	156946200	+	0.000640612
chr1	156946220	156946260	+	3.48221e-05
chr1	156946280	156946340	+	0.000427644
chr1	156946500	156946520	+	6.01748e-06
chr1	156946580	156946620	+	1.34127e-05
chr1	157080540	157080580	+	0.000320544
chr1	157081040	157081060	+	2.08079e-05
chr1	157084100	157084120	+	0.000640612
chr1	157084980	157085000	+	0.000640612
chr1	157139140	157139160	+	0.000218793
chr1	157625740	157625760	+	1.70931e-06
chr1	157694940	157694960	+	0.000640612
chr1	157779980	157780000	+	0.000640612
chr1	157848640	157848660	+	6.9168e-05
chr1	157854100	157854120	+	6.9168e-05
chr1	157854560	157854580	+	2.08079e-05
chr1	158325880	158325900	+	0.000640612
chr1	158360620	158360640	+	0.000640612
chr1	158370080	158370100	+	0.000640612
chr1	158387740	158387760	+	2.08079e-05
chr1	158800640	158800660	+	0.000218793
chr1	159015020	159015040	+	1.70931e-06
chr1	160009060	160009080	+	5.93293e-10
chr1	160958620	160958640	+	0.000218793
chr1	162806340	162806360	+	2.08079e-05
chr1	162950160	162950180	+	0.000640612
chr1	162950220	162950240	+	0.000218793
chr1	162962560	162962580	+	4.76175e-07
chr1	163048640	163048660	+	0.000218793
chr1	163655900	163655920	+	6.01748e-06
chr1	163656040	163656060	+	0.000218793
chr1	163747160	163747180	+	6.9168e-05
chr1	164603140	164603180	+	4.4988e-05
chr1	164605940	164605960	+	0.000640612
chr1	164610120	164610140	+	9.0622e-09
chr1	164627660	164627680	+	0.000640612
chr1	164627820	164627840	+	2.08079e-05
chr1	164627940	164627980	+	4.4988e-05
chr1	164628060	164628080	+	0.000640612
chr1	164628100	164628120	+	1.70931e-06
chr1	164628160	164628180	+	6.01748e-06
chr1	164634900	164634920	+	6.9168e-05
chr1	164635540	164635560	+	0.000218793
chr1	164636000	164636040	+	2.08079e-05
chr1	164636700	164636720	+	0.000218793
chr1	164639040	164639060	+	6.9168e-05
chr1	164640800	164640820	+	2.08079e-05
chr1	164653340	164653360	+	6.01748e-06
chr1	165176700	165176720	+	0.000218793
chr1	165177960	165177980	+	6.9168e-05
chr1	165187560	165187580	+	1.70931e-06
chr1	165187640	165187660	+	2.08079e-05
chr1	165187840	165187900	+	0.000221043
chr1	165192040	165192060	+	2.08079e-05
chr1	165241780	165241800	+	4.76175e-07
chr1	165241880	165241920	+	0.0001198
chr1	165242040	165242060	+	0.000640612
chr1	165242640	165242660	+	0.000640612
chr1	165242820	165242860	+	3.02601e-06
chr1	165242960	165243020	+	0.00042908
chr1	165243160	165243180	+	1.70931e-06
chr1	165243280	165243320	+	0.000323315
chr1	165243420	165243440	+	4.76175e-07
chr1	165944360	165944400	+	0.000429702
chr1	165944420	165944440	+	0.000640612
chr1	167106020	167106040	+	6.9168e-05
chr1	167513500	167513520	+	6.9168e-05
chr1	167527240	167527260	+	0.000218793
chr1	167572400	167572460	+	0.00021355
chr1	167739760	167739780	+	0.000640612
chr1	167739800	167739820	+	6.9168e-05
chr1	167762860	167762880	+	6.9168e-05
chr1	167972140	167972160	+	0.000640612
chr1	168330180	168330200	+	4.76175e-07
chr1	169270500	169270520	+	6.9168e-05
chr1	170059820	170059840	+	9.0622e-09
chr1	170086160	170086180	+	6.9168e-05
chr1	170222900	170222920	+	4.76175e-07
chr1	170229080	170229100	+	0.000640612
chr1	170233720	170233740	+	6.01748e-06
chr1	170235780	170235800	+	0.000640612
chr1	170244540	170244560	+	6.9168e-05
chr1	170247900	170247920	+	6.9168e-05
chr1	170249620	170249640	+	6.9168e-05
chr1	170249980	170250000	+	0.000218793
chr1	170257420	170257440	+	0.000218793
chr1	170271660	170271700	+	0.00035489
chr1	170276420	170276460	+	0.0001198
chr1	170283820	170283840	+	0.000218793
chr1	170283880	170283900	+	0.000640612
chr1	170286640	170286660	+	3.45468e-08
chr1	170290960	170290980	+	0.000640612
chr1	170294440	170294460	+	0.000640612
chr1	170299380	170299400	+	6.9168e-05
chr1	170302140	170302160	+	6.9168e-05
chr1	170306320	170306340	+	0.000218793
chr1	170307920	170307940	+	0.000640612
chr1	170310560	170310580	+	2.08079e-05
chr1	170311420	170311440	+	1.29582e-07
chr1	170311840	170311860	+	6.9168e-05
chr1	170313420	170313440	+	6.9168e-05
chr1	170321420	170321460	+	0.000429702
chr1	170323060	170323080	+	1.70931e-06
chr1	170323180	170323200	+	0.000218793
chr1	170323760	170323780	+	0.000218793
chr1	170325760	170325780	+	6.9168e-05
chr1	170327560	170327580	+	0.000218793
chr1	170330360	170330380	+	6.9168e-05
chr1	170332540	170332560	+	0.000640612
chr1	170335080	170335100	+	6.9168e-05
chr1	170335220	170335240	+	0.000218793
chr1	170339340	170339360	+	0.000218793
chr1	170339840	170339860	+	6.9168e-05
chr1	170343040	170343060	+	6.9168e-05
chr1	170347080	170347100	+	0.000218793
chr1	170347200	170347220	+	0.000640612
chr1	170348480	170348500	+	6.9168e-05
chr1	170349020	170349040	+	6.01748e-06
chr1	170350700	170350720	+	6.01748e-06
chr1	170351000	170351040	+	0.000429702
chr1	170351380	170351400	+	0.000218793
chr1	170352640	170352660	+	4.76175e-07
chr1	170352800	170352820	+	4.76175e-07
chr1	170353800	170353820	+	0.000640612
chr1	170360540	170360560	+	6.9168e-05
chr1	170361340	170361360	+	6.9168e-05
chr1	170361440	170361460	+	6.01748e-06
chr1	170361560	170361620	+	0.000287038
chr1	170362040	170362080	+	0.000112405
chr1	170362180	170362200	+	0.000640612
chr1	171428720	171428740	+	0.000640612
chr1	171729580	171729600	+	6.01748e-06
chr1	171904120	171904140	+	0.000218793
chr1	171906960	171906980	+	6.01748e-06
chr1	171907800	171907820	+	0.000640612
chr1	171915080	171915100	+	0.000640612
chr1	171920700	171920720	+	0.000640612
chr1	172028380	172028400	+	0.000218793
chr1	172127080	172127100	+	0.000640612
chr1	172773080	172773100	+	0.000640612
chr1	172964080	172964140	+	0.000214119
chr1	172967160	172967220	+	2.30564e-05
chr1	172968140	172968180	+	1.04085e-05
chr1	172994300	172994360	+	7.69426e-05
chr1	172994840	172994880	+	8.71926e-07
chr1	172995500	172995540	+	5.69806e-09
chr1	173001920	173001980	+	7.29455e-05
chr1	173002460	173002520	+	7.2954e-05
chr1	173003120	173003180	+	2.16757e-06
chr1	173009540	173009600	+	3.14536e-06
chr1	173010080	173010140	+	2.99927e-05
chr1	173010740	173010800	+	0.000213541
chr1	173031980	173032040	+	7.31514e-07
chr1	173235480	173235500	+	2.08079e-05
chr1	173255660	173255680	+	0.000218793
chr1	173327260	173327280	+	6.9168e-05
chr1	173381860	173381880	+	0.000640612
chr1	173433220	173433280	+	1.38721e-05
chr1	175837460	175837480	+	1.70931e-06
chr1	177618060	177618080	+	0.000640612
chr1	177858560	177858600	+	4.4988e-05
chr1	178666020	178666040	+	0.000218793
chr1	178680120	178680140	+	0.000218793
chr1	178685700	178685720	+	0.000640612
chr1	178685780	178685800	+	6.9168e-05
chr1	178705200	178705220	+	0.000640612
chr1	178765260	178765280	+	0.000218793
chr1	178765840	178765860	+	0.000640612
chr1	179135980	179136000	+	6.9168e-05
chr1	179156440	179156460	+	2.08079e-05
chr1	179161580	179161620	+	0.00035489
chr1	179696460	179696480	+	6.9168e-05
chr1	179958160	179958180	+	1.29582e-07
chr1	179958240	179958260	+	6.9168e-05
chr1	180258980	180259000	+	6.9168e-05
chr1	180260340	180260360	+	0.000218793
chr1	180267760	180267820	+	0.000147868
chr1	180297660	180297680	+	6.9168e-05
chr1	180403220	180403240	+	0.000640612
chr1	181131120	181131140	+	0.000640612
chr1	181293140	181293160	+	0.000640612
chr1	181450400	181450420	+	6.9168e-05
chr1	182252300	182252320	+	0.000218793
chr1	182257400	182257420	+	1.29582e-07
chr1	182258320	182258340	+	0.000218793
chr1	182635740	182635760	+	1.29582e-07
chr1	182740260	182740280	+	0.000218793
chr1	182740300	182740320	+	2.08079e-05
chr1	182813380	182813400	+	6.01748e-06
chr1	182920560	182920580	+	0.000640612
chr1	182926200	182926220	+	0.000218793
chr1	182929940	182929980	+	0.000640612
chr1	183106500	183106520	+	0.000218793
chr1	183107580	183107620	+	1.70931e-06
chr1	183107740	183107760	+	0.000640612
chr1	183107820	183107840	+	0.000218793
chr1	183107940	183107980	+	0.000429702
chr1	183109540	183109560	+	6.9168e-05
chr1	183133180	183133200	+	6.01748e-06
chr1	183141280	183141300	+	6.01748e-06
chr1	183141380	183141400	+	6.9168e-05
chr1	183172160	183172200	+	0.000640612
chr1	183219480	183219500	+	2.08079e-05
chr1	183743740	183743760	+	2.08079e-05
chr1	183743800	183743820	+	1.29582e-07
chr1	183851800	183851820	+	0.000640612
chr1	183950240	183950260	+	0.000640612
chr1	184005120	184005140	+	0.000640612
chr1	184209560	184209580	+	6.01748e-06
chr1	184323520	184323540	+	6.9168e-05
chr1	184397880	184397900	+	6.9168e-05
chr1	184411600	184411620	+	6.9168e-05
chr1	184411680	184411700	+	0.000218793
chr1	184422960	184422980	+	0.000640612
chr1	184436720	184436740	+	0.000640612
chr1	184447520	184447540	+	6.9168e-05
chr1	184639300	184639320	+	0.000218793
chr1	185794980	185795000	+	0.000218793
chr1	185836320	185836340	+	1.70931e-06
chr1	186509240	186509260	+	0.000640612
chr1	186551260	186551280	+	0.000218793
chr1	186555920	186555940	+	0.000640612
chr1	186682220	186682240	+	2.08079e-05
chr1	186754460	186754480	+	0.000640612
chr1	187134120	187134140	+	0.000218793
chr1	187145240	187145260	+	0.000218793
chr1	187250200	187250220	+	0.000640612
chr1	188904180	188904200	+	2.08079e-05
chr1	189620460	189620480	+	0.000640612
chr1	191010840	191010860	+	0.000218793
chr1	191470760	191470780	+	3.45468e-08
chr1	191480520	191480540	+	2.08079e-05
chr1	191511920	191511940	+	0.000218793
chr1	191853680	191853700	+	1.29582e-07
chr1	192306840	192306860	+	0.000218793
chr1	192306940	192306960	+	0.000218793
chr1	192307000	192307020	+	6.01748e-06
chr1	192622540	192622560	+	0.000640612
chr1	192773080	192773100	+	0.000218793
chr1	193792940	193792960	+	0.000640612
chr1	193961480	193961500	+	2.08079e-05
chr1	194484360	194484380	+	0.000640612
chr1	194671440	194671460	+	0.000218793
chr1	194671700	194671720	+	0.000640612
chr1	194672440	194672460	+	6.01748e-06
chr1	194672920	194672940	+	2.08079e-05
chr1	194673020	194673040	+	2.08079e-05
chr1	195079400	195079420	+	6.9168e-05
chr10	3158100	3158120	+	0.000640612
chr10	4619980	4620000	+	6.9168e-05
chr10	4620600	4620620	+	6.9168e-05
chr10	4622020	4622040	+	4.76175e-07
chr10	4622260	4622280	+	0.000640612
chr10	4622320	4622340	+	0.000218793
chr10	4622620	4622700	+	0.000232144
chr10	4622860	4622900	+	0.000109461
chr10	4623320	4623340	+	2.08079e-05
chr10	4623480	4623500	+	5.93293e-10
chr10	4623740	4623780	+	0.000429702
chr10	4623860	4623880	+	2.08079e-05
chr10	4624300	4624340	+	0.00032116
chr10	4624360	4624380	+	0.000218793
chr10	4625240	4625260	+	2.08079e-05
chr10	4625360	4625380	+	0.000640612
chr10	4625460	4625480	+	6.9168e-05
chr10	4625760	4625780	+	0.000640612
chr10	4625920	4625940	+	0.000640612
chr10	4626600	4626620	+	0.000218793
chr10	4626640	4626680	+	0.000218793
chr10	4626700	4626720	+	0.000640612
chr10	4627200	4627280	+	2.41174e-05
chr10	4627460	4627500	+	0.000218793
chr10	4627920	4627940	+	4.76175e-07
chr10	4628120	4628140	+	1.29582e-07
chr10	4628280	4628300	+	0.000218793
chr10	5942240	5942260	+	0.000640612
chr10	5956940	5956960	+	6.01748e-06
chr10	5958240	5958260	+	0.000640612
chr10	5959180	5959200	+	6.9168e-05
chr10	5990580	5990600	+	6.9168e-05
chr10	6006260	6006280	+	2.08079e-05
chr10	6084580	6084600	+	0.000218793
chr10	6220340	6220360	+	6.9168e-05
chr10	6290120	6290140	+	0.000640612
chr10	6325520	6325540	+	0.000218793
chr10	6761560	6761580	+	6.9168e-05
chr10	7525600	7525620	+	2.08079e-05
chr10	7639460	7639480	+	0.000640612
chr10	8219500	8219520	+	0.000640612
chr10	8264920	8264960	+	0.000429702
chr10	8265360	8265380	+	6.01748e-06
chr10	8265800	8265820	+	3.45468e-08
chr10	8266080	8266100	+	0.000640612
chr10	8266180	8266200	+	6.01748e-06
chr10	8266220	8266240	+	0.000640612
chr10	8266400	8266420	+	0.000640612
chr10	8266840	8266860	+	0.000218793
chr10	8267560	8267580	+	6.01748e-06
chr10	8268080	8268100	+	6.9168e-05
chr10	8268240	8268260	+	0.000640612
chr10	8268900	8268920	+	4.76175e-07
chr10	8269000	8269020	+	0.000218793
chr10	8269360	8269380	+	0.000218793
chr10	8269500	8269520	+	2.08079e-05
chr10	8269540	8269560	+	0.000218793
chr10	8269820	8269840	+	0.000218793
chr10	8270200	8270220	+	0.000218793
chr10	8270560	8270580	+	0.000218793
chr10	11211880	11211900	+	0.000218793
chr10	12254380	12254400	+	0.000218793
chr10	12334680	12334700	+	6.01748e-06
chr10	12404220	12404240	+	2.08079e-05
chr10	12513740	12513760	+	9.0622e-09
chr10	12562720	12562740	+	0.000218793
chr10	12564840	12564860	+	2.08079e-05
chr10	12570340	12570360	+	0.000640612
chr10	12642380	12642400	+	0.000218793
chr10	12642420	12642440	+	0.000640612
chr10	13608360	13608380	+	1.70931e-06
chr10	13610700	13610720	+	6.9168e-05
chr10	13610960	13610980	+	6.9168e-05
chr10	14187020	14187040	+	0.000640612
chr10	14465180	14465200	+	6.9168e-05
chr10	14465560	14465580	+	2.08079e-05
chr10	14465640	14465660	+	4.76175e-07
chr10	14465780	14465800	+	3.45468e-08
chr10	14465960	14466000	+	4.4988e-05
chr10	14466120	14466140	+	6.9168e-05
chr10	14466540	14466600	+	0.000309524
chr10	17634760	17634780	+	0.000640612
chr10	17635040	17635060	+	0.000640612
chr10	17635100	17635120	+	2.08079e-05
chr10	17661240	17661260	+	0.000640612
chr10	17667320	17667340	+	0.000218793
chr10	18285620	18285640	+	0.000218793
chr10	19608180	19608200	+	0.000218793
chr10	19957040	19957060	+	0.000218793
chr10	21155940	21155960	+	0.000218793
chr10	21786440	21786460	+	0.000218793
chr10	22255920	22255940	+	6.9168e-05
chr10	22256520	22256540	+	0.000640612
chr10	23022480	23022500	+	2.08079e-05
chr10	23496880	23496920	+	0.00035489
chr10	23505160	23505180	+	0.000640612
chr10	23506280	23506320	+	2.08079e-05
chr10	25174760	25174800	+	0.000320371
chr10	25415380	25415400	+	6.9168e-05
chr10	26480900	26480920	+	0.000218793
chr10	26815060	26815080	+	0.000640612
chr10	27639140	27639160	+	0.000218793
chr10	27639560	27639580	+	0.000640612
chr10	28084700	28084720	+	0.000218793
chr10	28109360	28109380	+	4.76175e-07
chr10	29254720	29254740	+	0.000218793
chr10	29418640	29418660	+	0.000218793
chr10	29804080	29804100	+	6.01748e-06
chr10	30240020	30240040	+	2.08079e-05
chr10	30297900	30297920	+	0.000218793
chr10	30500220	30500260	+	0.00035489
chr10	30500800	30500820	+	6.9168e-05
chr10	30662180	30662220	+	0.000323315
chr10	30662260	30662280	+	1.70931e-06
chr10	31328420	31328480	+	0.000309524
chr10	31328500	31328520	+	6.9168e-05
chr10	31329260	31329280	+	6.01748e-06
chr10	31329340	31329360	+	0.000218793
chr10	32187480	32187500	+	0.000640612
chr10	33873480	33873500	+	0.000640612
chr10	34121640	34121660	+	0.000640612
chr10	36632360	36632380	+	6.9168e-05
chr10	36855660	36855680	+	6.9168e-05
chr10	36855920	36855940	+	4.76175e-07
chr10	36856460	36856480	+	0.000640612
chr10	36856680	36856700	+	1.70931e-06
chr10	36858360	36858380	+	3.45468e-08
chr10	36858400	36858420	+	2.08079e-05
chr10	36858440	36858480	+	1.34127e-05
chr10	36858520	36858560	+	2.08079e-05
chr10	39472360	39472380	+	0.000640612
chr10	39586860	39586880	+	0.000640612
chr10	40021960	40021980	+	0.000218793
chr10	40063880	40063900	+	0.000640612
chr10	40606520	40606540	+	0.000218793
chr10	40606700	40606720	+	0.000218793
chr10	40606740	40606760	+	0.000640612
chr10	41190080	41190100	+	0.000640612
chr10	41405340	41405360	+	0.000640612
chr10	41519280	41519300	+	2.08079e-05
chr10	41519780	41519800	+	4.76175e-07
chr10	41520380	41520400	+	0.000218793
chr10	41904220	41904240	+	0.000640612
chr10	41916140	41916160	+	0.000640612
chr10	41916500	41916520	+	2.08079e-05
chr10	41946280	41946300	+	2.08079e-05
chr10	41947240	41947260	+	0.000640612
chr10	41951100	41951120	+	0.000640612
chr10	41990020	41990040	+	6.9168e-05
chr10	41993700	41993720	+	2.08079e-05
chr10	42479920	42479940	+	6.9168e-05
chr10	42742280	42742300	+	6.9168e-05
chr10	43053200	43053220	+	6.9168e-05
chr10	43175980	43176040	+	0.000286627
chr10	43176060	43176080	+	1.29582e-07
chr10	43176300	43176320	+	4.76175e-07
chr10	43410660	43410680	+	0.000640612
chr10	43717460	43717480	+	0.000640612
chr10	43717640	43717660	+	0.000640612
chr10	43718660	43718680	+	0.000640612
chr10	43814720	43814740	+	0.000640612
chr10	44160180	44160200	+	1.70931e-06
chr10	44815440	44815480	+	0.00033071
chr10	46904420	46904440	+	0.000218793
chr10	50140960	50140980	+	0.000640612
chr10	50141860	50141880	+	2.08079e-05
chr10	50142140	50142180	+	0.000218793
chr10	50142580	50142600	+	2.08079e-05
chr10	50142740	50142760	+	0.000218793
chr10	50143300	50143320	+	0.000640612
chr10	50143520	50143580	+	0.00045013
chr10	50143800	50143840	+	0.000640612
chr10	50143960	50143980	+	6.01748e-06
chr10	50144080	50144100	+	0.000640612
chr10	50145200	50145240	+	0.000429702
chr10	50145800	50145860	+	0.000287038
chr10	50146900	50146920	+	2.08079e-05
chr10	52062460	52062480	+	0.000640612
chr10	52096640	52096660	+	2.08079e-05
chr10	52387200	52387220	+	0.000218793
chr10	52958120	52958140	+	0.000218793
chr10	53264820	53264840	+	0.000218793
chr10	53317100	53317120	+	0.000640612
chr10	54349460	54349480	+	9.0622e-09
chr10	55996680	55996700	+	0.000218793
chr10	56074740	56074760	+	0.000640612
chr10	56659980	56660000	+	0.000218793
chr10	57241480	57241500	+	0.000640612
chr10	57247560	57247580	+	2.08079e-05
chr10	57788980	57789000	+	0.000218793
chr10	58628080	58628100	+	0.000640612
chr10	58762660	58762680	+	6.9168e-05
chr10	58877460	58877480	+	0.000640612
chr10	58911000	58911020	+	0.000218793
chr10	59056600	59056620	+	0.000640612
chr10	59412520	59412540	+	1.70931e-06
chr10	59413340	59413380	+	0.000323315
chr10	59413700	59413720	+	0.000218793
chr10	59440200	59440220	+	6.01748e-06
chr10	60226280	60226300	+	2.08079e-05
chr10	60226860	60226880	+	1.70931e-06
chr10	60237840	60237860	+	0.000640612
chr10	60522100	60522120	+	6.01748e-06
chr10	60563120	60563140	+	1.29582e-07
chr10	60892260	60892280	+	0.000640612
chr10	60894660	60894680	+	0.000640612
chr10	60976500	60976520	+	0.000640612
chr10	60982820	60982840	+	0.000640612
chr10	61037660	61037680	+	2.08079e-05
chr10	61273820	61273840	+	0.000218793
chr10	61422620	61422640	+	6.01748e-06
chr10	61649080	61649100	+	0.000640612
chr10	61732120	61732140	+	0.000640612
chr10	61732180	61732200	+	0.000218793
chr10	61732600	61732620	+	0.000640612
chr10	61753040	61753080	+	1.34127e-05
chr10	61755060	61755080	+	0.000218793
chr10	61761900	61761920	+	2.08079e-05
chr10	61785900	61785920	+	0.000640612
chr10	61969760	61969780	+	0.000640612
chr10	62098520	62098540	+	0.000640612
chr10	62098960	62098980	+	0.000640612
chr10	62099160	62099180	+	0.000218793
chr10	62099400	62099420	+	2.08079e-05
chr10	62099480	62099500	+	6.9168e-05
chr10	62354860	62354900	+	0.000429702
chr10	62874460	62874480	+	6.9168e-05
chr10	62892200	62892240	+	3.54386e-05
chr10	62927860	62927880	+	6.9168e-05
chr10	63177300	63177320	+	9.0622e-09
chr10	64090420	64090440	+	0.000640612
chr10	65633160	65633200	+	0.00014398
chr10	65633220	65633240	+	1.29582e-07
chr10	65639480	65639500	+	0.000640612
chr10	65808660	65808680	+	0.000640612
chr10	66261400	66261420	+	1.70931e-06
chr10	66497340	66497360	+	0.000218793
chr10	67557520	67557540	+	6.9168e-05
chr10	67557600	67557620	+	0.000218793
chr10	67558140	67558160	+	0.000640612
chr10	67558640	67558660	+	2.08079e-05
chr10	67558820	67558860	+	0.000109461
chr10	67559060	67559100	+	0.000110251
chr10	67559260	67559300	+	0.000112405
chr10	67559420	67559440	+	6.9168e-05
chr10	67559500	67559520	+	6.01748e-06
chr10	67560220	67560240	+	1.47203e-10
chr10	67561160	67561180	+	6.01748e-06
chr10	67581060	67581080	+	0.000640612
chr10	67594900	67594920	+	0.000218793
chr10	67595560	67595580	+	0.000218793
chr10	67595920	67595960	+	0.000110251
chr10	67596040	67596060	+	1.70931e-06
chr10	67596500	67596540	+	0.000429702
chr10	67648820	67648840	+	0.000640612
chr10	67704220	67704240	+	2.08079e-05
chr10	67772340	67772360	+	6.9168e-05
chr10	68376000	68376020	+	0.000640612
chr10	68801160	68801180	+	1.29582e-07
chr10	68846120	68846140	+	6.9168e-05
chr10	71299680	71299700	+	0.000640612
chr10	71821680	71821700	+	0.000640612
chr10	73153580	73153600	+	0.000218793
chr10	74179660	74179680	+	0.000640612
chr10	74592920	74592940	+	1.70931e-06
chr10	75147060	75147080	+	6.9168e-05
chr10	75322120	75322140	+	2.33391e-09
chr10	75322220	75322240	+	6.01748e-06
chr10	75322440	75322460	+	0.000640612
chr10	75322500	75322540	+	2.08079e-05
chr10	75386400	75386420	+	6.9168e-05
chr10	75389940	75389960	+	0.000640612
chr10	75837720	75837740	+	6.9168e-05
chr10	75855100	75855120	+	0.000640612
chr10	76066500	76066520	+	0.000640612
chr10	76172020	76172060	+	0.00032116
chr10	76172140	76172160	+	0.000640612
chr10	76172220	76172240	+	6.01748e-06
chr10	76172360	76172400	+	3.54386e-05
chr10	76172580	76172640	+	0.00021411
chr10	76172700	76172720	+	2.08079e-05
chr10	76175080	76175100	+	2.08079e-05
chr10	76248920	76248940	+	6.9168e-05
chr10	76515600	76515620	+	0.000218793
chr10	76517660	76517680	+	6.9168e-05
chr10	76527980	76528000	+	0.000640612
chr10	76559100	76559120	+	0.000640612
chr10	76783300	76783320	+	0.000640612
chr10	77521780	77521800	+	0.000640612
chr10	77585580	77585620	+	0.000429702
chr10	77735900	77735920	+	0.000218793
chr10	77736920	77736940	+	2.08079e-05
chr10	77832820	77832860	+	0.000323315
chr10	78051600	78051640	+	0.00035489
chr10	78051920	78051940	+	2.08079e-05
chr10	78052100	78052120	+	2.08079e-05
chr10	78528260	78528280	+	0.000218793
chr10	78528840	78528860	+	0.000218793
chr10	78529200	78529240	+	0.000429702
chr10	78784360	78784380	+	0.000640612
chr10	78878780	78878800	+	0.000640612
chr10	78989860	78989880	+	6.01748e-06
chr10	79011540	79011560	+	0.000640612
chr10	79166260	79166320	+	8.94482e-06
chr10	79221940	79221960	+	6.01748e-06
chr10	79373780	79373800	+	0.000218793
chr10	79498820	79498840	+	0.000218793
chr10	79532720	79532740	+	0.000640612
chr10	79535260	79535280	+	2.08079e-05
chr10	79536820	79536840	+	6.9168e-05
chr10	79537980	79538000	+	0.000640612
chr10	79539500	79539520	+	0.000218793
chr10	79540540	79540560	+	2.08079e-05
chr10	79542420	79542440	+	0.000218793
chr10	79542880	79542900	+	0.000640612
chr10	79542940	79542960	+	0.000640612
chr10	79543180	79543200	+	0.000218793
chr10	79543420	79543460	+	1.34127e-05
chr10	79543520	79543540	+	6.01748e-06
chr10	79543760	79543820	+	8.95332e-06
chr10	79543980	79544000	+	0.000640612
chr10	79544100	79544120	+	6.9168e-05
chr10	79544460	79544480	+	0.000218793
chr10	79545000	79545020	+	2.08079e-05
chr10	79545140	79545160	+	6.9168e-05
chr10	79545400	79545420	+	0.000640612
chr10	79549120	79549160	+	0.000640612
chr10	79711700	79711760	+	0.000286627
chr10	79804540	79804560	+	0.000640612
chr10	79843780	79843800	+	6.9168e-05
chr10	79843980	79844000	+	0.000640612
chr10	79844160	79844180	+	0.000640612
chr10	79844560	79844580	+	0.000640612
chr10	79855660	79855680	+	6.9168e-05
chr10	79873040	79873060	+	6.9168e-05
chr10	79877940	79877960	+	6.01748e-06
chr10	79880160	79880180	+	1.29582e-07
chr10	80011680	80011700	+	0.000640612
chr10	80012340	80012380	+	0.000323315
chr10	80013340	80013360	+	6.9168e-05
chr10	80013580	80013600	+	0.000218793
chr10	80049540	80049560	+	1.70931e-06
chr10	80097900	80097920	+	0.000640612
chr10	80107480	80107500	+	0.000640612
chr10	80129020	80129040	+	0.000640612
chr10	80129460	80129480	+	0.000640612
chr10	80149560	80149580	+	6.9168e-05
chr10	80198160	80198180	+	0.000640612
chr10	80284440	80284460	+	0.000218793
chr10	80364820	80364840	+	6.01748e-06
chr10	80507260	80507280	+	0.000640612
chr10	80562400	80562420	+	0.000640612
chr10	80771240	80771260	+	0.000218793
chr10	80859280	80859300	+	4.76175e-07
chr10	80859580	80859600	+	6.9168e-05
chr10	80860820	80860840	+	0.000218793
chr10	80861940	80861960	+	2.08079e-05
chr10	80862200	80862240	+	0.000640612
chr10	80862280	80862300	+	0.000218793
chr10	80862400	80862420	+	0.000640612
chr10	80862560	80862580	+	6.01748e-06
chr10	80862780	80862800	+	0.000218793
chr10	80862960	80862980	+	6.9168e-05
chr10	80863200	80863220	+	0.000218793
chr10	80863760	80863800	+	0.00035489
chr10	80864720	80864740	+	6.9168e-05
chr10	80867680	80867720	+	0.00035489
chr10	80883460	80883480	+	0.000640612
chr10	80951020	80951040	+	0.000640612
chr10	80953940	80953960	+	0.000640612
chr10	80992480	80992500	+	2.08079e-05
chr10	81084900	81084920	+	2.08079e-05
chr10	81131380	81131400	+	0.000640612
chr10	81218320	81218340	+	1.70931e-06
chr10	81377420	81377440	+	2.08079e-05
chr10	81448940	81448960	+	0.000640612
chr10	81603180	81603200	+	0.000218793
chr10	81842540	81842560	+	0.000640612
chr10	82135080	82135100	+	6.9168e-05
chr10	83101600	83101620	+	0.000640612
chr10	83639960	83639980	+	6.9168e-05
chr10	83989180	83989220	+	0.00033071
chr10	83989560	83989580	+	2.08079e-05
chr10	83990080	83990120	+	0.00014398
chr10	83990320	83990340	+	6.01748e-06
chr10	83996300	83996320	+	0.000640612
chr10	83996340	83996380	+	4.4988e-05
chr10	83996440	83996480	+	0.000640612
chr10	85073320	85073340	+	0.000218793
chr10	85420440	85420460	+	0.000640612
chr10	86153740	86153760	+	0.000640612
chr10	86156200	86156220	+	0.000218793
chr10	86156680	86156700	+	6.9168e-05
chr10	86157180	86157200	+	6.9168e-05
chr10	86158440	86158480	+	0.000218793
chr10	86158580	86158620	+	0.00035489
chr10	86158640	86158660	+	6.9168e-05
chr10	86164660	86164680	+	0.000640612
chr10	86826780	86826820	+	0.000429702
chr10	86826860	86826880	+	6.01748e-06
chr10	87088280	87088300	+	5.93293e-10
chr10	88113220	88113240	+	3.45468e-08
chr10	88124560	88124580	+	6.9168e-05
chr10	88879380	88879400	+	0.000640612
chr10	88886020	88886040	+	6.9168e-05
chr10	89187580	89187600	+	0.000640612
chr10	89284160	89284180	+	4.76175e-07
chr10	90059760	90059780	+	0.000218793
chr10	90541600	90541620	+	0.000218793
chr10	90579720	90579740	+	0.000640612
chr10	90580020	90580040	+	6.01748e-06
chr10	90581240	90581260	+	0.000218793
chr10	90585100	90585120	+	0.000640612
chr10	90603320	90603340	+	6.9168e-05
chr10	90616800	90616820	+	2.08079e-05
chr10	90618340	90618360	+	0.000218793
chr10	90619280	90619300	+	0.000218793
chr10	90620420	90620440	+	0.000640612
chr10	90625740	90625760	+	0.000640612
chr10	90635460	90635480	+	0.000640612
chr10	90644160	90644220	+	0.000221043
chr10	90644860	90644880	+	1.47203e-10
chr10	92712800	92712820	+	1.70931e-06
chr10	92727860	92727880	+	6.9168e-05
chr10	92727980	92728040	+	0.000293404
chr10	92915720	92915780	+	2.57564e-06
chr10	92987400	92987420	+	6.9168e-05
chr10	93087840	93087860	+	6.9168e-05
chr10	94874520	94874540	+	1.70931e-06
chr10	94874560	94874580	+	6.9168e-05
chr10	94875040	94875060	+	0.000218793
chr10	94877520	94877540	+	0.000218793
chr10	94959620	94959640	+	1.29582e-07
chr10	95011040	95011060	+	0.000640612
chr10	95035880	95035900	+	0.000218793
chr10	95540160	95540180	+	1.47203e-10
chr10	95540200	95540220	+	0.000640612
chr10	95540240	95540260	+	6.9168e-05
chr10	95540300	95540360	+	2.32148e-05
chr10	95540380	95540400	+	1.70931e-06
chr10	95540420	95540440	+	2.08079e-05
chr10	95540480	95540500	+	5.93293e-10
chr10	96574800	96574820	+	0.000218793
chr10	98525040	98525060	+	0.000640612
chr10	98874540	98874560	+	6.01748e-06
chr10	99499760	99499780	+	4.76175e-07
chr10	99861340	99861360	+	0.000640612
chr10	101823080	101823100	+	3.45468e-08
chr10	106922940	106922960	+	6.9168e-05
chr10	106923020	106923040	+	0.000640612
chr10	107632260	107632280	+	0.000218793
chr10	107648700	107648720	+	0.000640612
chr10	108566960	108566980	+	6.01748e-06
chr10	109451620	109451640	+	2.08079e-05
chr10	110849620	110849640	+	0.000640612
chr10	111592220	111592240	+	0.000640612
chr10	112362680	112362700	+	3.45468e-08
chr10	112362820	112362840	+	1.70931e-06
chr10	112364300	112364320	+	1.29582e-07
chr10	112364760	112364780	+	0.000218793
chr10	112364940	112364980	+	0.000109635
chr10	112365080	112365100	+	0.000218793
chr10	114727800	114727820	+	2.08079e-05
chr10	114794440	114794460	+	0.000640612
chr10	114795480	114795500	+	0.000218793
chr10	115036660	115036680	+	0.000218793
chr10	115773440	115773460	+	0.000640612
chr10	115774940	115774960	+	0.000640612
chr10	115798520	115798540	+	0.000218793
chr10	115972280	115972300	+	6.9168e-05
chr10	115972340	115972360	+	6.9168e-05
chr10	115972500	115972520	+	6.9168e-05
chr10	116002000	116002020	+	0.000640612
chr10	116360240	116360260	+	0.000640612
chr10	116409800	116409820	+	6.9168e-05
chr10	116499140	116499160	+	0.000218793
chr10	116509780	116509800	+	2.08079e-05
chr10	116510180	116510200	+	6.9168e-05
chr10	116510720	116510740	+	6.01748e-06
chr10	116510760	116510780	+	0.000218793
chr10	116510960	116510980	+	0.000218793
chr10	116511520	116511540	+	6.9168e-05
chr10	116513940	116513960	+	0.000640612
chr10	116534420	116534440	+	2.08079e-05
chr10	116652600	116652620	+	0.000640612
chr10	117099360	117099380	+	3.45468e-08
chr10	117099400	117099440	+	3.45843e-05
chr10	117127420	117127440	+	0.000640612
chr10	117172020	117172040	+	2.08079e-05
chr10	117172480	117172500	+	0.000640612
chr10	117172540	117172560	+	0.000640612
chr10	117172820	117172840	+	0.000218793
chr10	117173160	117173180	+	0.000640612
chr10	117173960	117173980	+	0.000218793
chr10	117233960	117234000	+	0.000429702
chr10	117531640	117531660	+	0.000640612
chr10	118295740	118295760	+	0.000640612
chr10	118296880	118296900	+	4.76175e-07
chr10	118297060	118297100	+	1.04212e-05
chr10	118297200	118297220	+	0.000640612
chr10	118305820	118305840	+	6.01748e-06
chr10	118557020	118557040	+	0.000640612
chr10	118627160	118627180	+	0.000640612
chr10	118648200	118648220	+	6.9168e-05
chr10	118648480	118648520	+	0.00033071
chr10	118648660	118648680	+	0.000640612
chr10	118680520	118680540	+	0.000640612
chr10	119416920	119416940	+	0.000218793
chr10	119499320	119499360	+	0.00035489
chr10	119799780	119799800	+	0.000218793
chr10	119800260	119800300	+	0.000640612
chr10	119818680	119818700	+	0.000640612
chr10	119825420	119825440	+	2.08079e-05
chr10	119834960	119834980	+	2.08079e-05
chr10	119837580	119837600	+	0.000218793
chr10	119857540	119857560	+	4.76175e-07
chr10	119857960	119857980	+	6.01748e-06
chr10	119858100	119858120	+	0.000218793
chr10	119859120	119859140	+	6.9168e-05
chr10	119861220	119861240	+	6.9168e-05
chr10	119862320	119862340	+	6.9168e-05
chr10	119863200	119863240	+	0.00035489
chr10	119863260	119863300	+	0.000429702
chr10	119864280	119864320	+	0.000112405
chr10	119866020	119866040	+	2.08079e-05
chr10	119866480	119866500	+	0.000640612
chr10	119866520	119866540	+	1.29582e-07
chr10	119866560	119866580	+	0.000640612
chr10	119869100	119869120	+	6.01748e-06
chr10	119870080	119870100	+	6.01748e-06
chr10	119872160	119872180	+	6.01748e-06
chr10	119875260	119875300	+	0.000429702
chr10	119878940	119878960	+	0.000218793
chr10	119879640	119879660	+	0.000640612
chr10	119882900	119882920	+	6.01748e-06
chr10	119887420	119887440	+	0.000640612
chr10	119887720	119887740	+	0.000218793
chr10	119888100	119888120	+	6.9168e-05
chr10	119888220	119888240	+	0.000218793
chr10	119892660	119892680	+	0.000640612
chr10	119895260	119895280	+	0.000640612
chr10	119897000	119897020	+	0.000218793
chr10	119898080	119898100	+	0.000640612
chr10	119898920	119898940	+	2.08079e-05
chr10	119898980	119899000	+	0.000218793
chr10	119899040	119899060	+	1.29582e-07
chr10	119899160	119899180	+	0.000218793
chr10	119910120	119910140	+	0.000640612
chr10	119911020	119911040	+	0.000218793
chr10	119911960	119911980	+	0.000218793
chr10	119912440	119912480	+	0.000429702
chr10	119912740	119912760	+	0.000640612
chr10	119912860	119912880	+	0.000218793
chr10	119912940	119912960	+	6.9168e-05
chr10	119913020	119913060	+	0.000429702
chr10	119913220	119913240	+	6.01748e-06
chr10	119913520	119913540	+	0.000640612
chr10	120187760	120187780	+	0.000218793
chr10	120210680	120210700	+	0.000640612
chr10	120369840	120369860	+	0.000640612
chr10	120411440	120411460	+	0.000640612
chr10	120863280	120863300	+	0.000640612
chr10	122241020	122241040	+	0.000640612
chr10	122303720	122303760	+	2.08079e-05
chr10	122417300	122417320	+	4.76175e-07
chr10	122418340	122418360	+	6.9168e-05
chr10	122419120	122419140	+	6.9168e-05
chr10	122432600	122432620	+	0.000218793
chr10	122450600	122450640	+	0.000640612
chr10	122455200	122455220	+	0.000640612
chr10	123650240	123650260	+	2.08079e-05
chr10	125214560	125214600	+	0.00035489
chr10	126504440	126504460	+	0.000218793
chr10	126629720	126629760	+	0.000109635
chr10	126631500	126631520	+	0.000640612
chr10	126746840	126746860	+	0.000640612
chr10	126911980	126912000	+	0.000640612
chr10	126956460	126956480	+	6.9168e-05
chr10	126975360	126975380	+	0.000218793
chr10	126975460	126975500	+	0.000429702
chr10	126975580	126975600	+	0.000640612
chr10	126975620	126975660	+	3.54386e-05
chr10	126975760	126975820	+	0.000309524
chr10	126976060	126976080	+	0.000218793
chr10	126976100	126976120	+	1.29582e-07
chr10	126976580	126976600	+	1.29582e-07
chr10	126977320	126977340	+	3.45468e-08
chr10	126977680	126977740	+	3.19978e-05
chr10	126978080	126978100	+	0.000640612
chr10	126978140	126978160	+	0.000640612
chr10	126978840	126978860	+	6.01748e-06
chr10	126979640	126979660	+	1.70931e-06
chr10	126980280	126980300	+	1.70931e-06
chr10	126981480	126981500	+	0.000640612
chr10	126981520	126981540	+	1.29582e-07
chr10	126981680	126981700	+	0.000218793
chr10	126982600	126982640	+	0.0001198
chr10	126982660	126982700	+	0.000218793
chr10	126982880	126982900	+	2.08079e-05
chr10	126983500	126983560	+	0.000217549
chr10	126983940	126983960	+	6.01748e-06
chr10	126985400	126985420	+	6.9168e-05
chr10	126985640	126985660	+	0.000218793
chr10	126986400	126986440	+	0.000429702
chr10	126987280	126987300	+	6.01748e-06
chr10	126987700	126987760	+	9.79928e-05
chr10	126988720	126988740	+	6.9168e-05
chr10	126989220	126989280	+	3.19978e-05
chr10	126989880	126989900	+	6.9168e-05
chr10	126990420	126990440	+	2.08079e-05
chr10	126990540	126990560	+	0.000218793
chr10	126991400	126991420	+	0.000640612
chr10	126992080	126992100	+	6.01748e-06
chr10	126992740	126992780	+	0.0001198
chr10	126992860	126992880	+	2.08079e-05
chr10	126993120	126993160	+	0.000218793
chr10	126993280	126993320	+	0.000110251
chr10	126993740	126993760	+	2.08079e-05
chr10	126994300	126994320	+	4.76175e-07
chr10	126994520	126994560	+	0.00014398
chr10	126995880	126995940	+	7.36595e-05
chr10	126996200	126996220	+	1.70931e-06
chr10	126997020	126997040	+	6.9168e-05
chr10	126997620	126997640	+	6.9168e-05
chr10	127000660	127000680	+	1.70931e-06
chr10	127000800	127000820	+	0.000218793
chr10	127003740	127003780	+	0.0001198
chr10	127003840	127003860	+	0.000640612
chr10	127004240	127004260	+	6.9168e-05
chr10	127004420	127004460	+	0.00032116
chr10	127006380	127006400	+	0.000640612
chr10	127008460	127008500	+	0.000323315
chr10	127009000	127009020	+	0.000218793
chr10	127009820	127009840	+	0.000640612
chr10	127009980	127010000	+	6.9168e-05
chr10	127010500	127010540	+	0.000320371
chr10	127011340	127011400	+	0.000500005
chr10	127011440	127011480	+	0.00014398
chr10	127011520	127011540	+	0.000640612
chr10	127012480	127012500	+	2.08079e-05
chr10	127013940	127013960	+	0.000218793
chr10	127015100	127015140	+	0.000429702
chr10	127015660	127015680	+	6.9168e-05
chr10	127015700	127015740	+	0.000640612
chr10	127018880	127018920	+	3.48221e-05
chr10	127020480	127020500	+	2.08079e-05
chr10	127020940	127020980	+	0.00035489
chr10	127021720	127021780	+	0.000427233
chr10	127025120	127025160	+	0.000109401
chr10	127025180	127025200	+	2.08079e-05
chr10	127025480	127025520	+	0.00035489
chr10	127025560	127025580	+	4.76175e-07
chr10	127029040	127029060	+	0.000218793
chr10	127029160	127029180	+	6.9168e-05
chr10	127030460	127030500	+	0.000109414
chr10	127032080	127032100	+	1.70931e-06
chr10	127042560	127042600	+	0.00033071
chr10	127042640	127042660	+	0.000640612
chr10	127042900	127042920	+	1.70931e-06
chr10	127045040	127045060	+	6.01748e-06
chr10	127047420	127047440	+	2.08079e-05
chr10	127047500	127047520	+	0.000640612
chr10	127049780	127049800	+	0.000218793
chr10	127057720	127057740	+	6.01748e-06
chr10	127057860	127057880	+	1.70931e-06
chr10	127057900	127057920	+	2.08079e-05
chr10	127062320	127062340	+	0.000640612
chr10	127098060	127098080	+	0.000218793
chr10	127100880	127100900	+	6.01748e-06
chr10	127101900	127101920	+	0.000218793
chr10	127102100	127102120	+	2.08079e-05
chr10	127508960	127508980	+	0.000640612
chr10	127568260	127568280	+	0.000640612
chr10	127569640	127569660	+	6.9168e-05
chr10	127765360	127765380	+	0.000640612
chr10	127895520	127895560	+	3.46488e-05
chr10	127927940	127927980	+	0.000429702
chr10	127928000	127928060	+	0.000640612
chr10	127928680	127928700	+	3.45468e-08
chr10	127928840	127928860	+	0.000640612
chr10	127947600	127947620	+	0.000218793
chr10	127948560	127948580	+	0.000218793
chr10	127954740	127954760	+	0.000218793
chr10	127957820	127957840	+	0.000218793
chr10	127985220	127985260	+	0.000429702
chr10	127985280	127985360	+	0.00022048
chr10	127985380	127985420	+	0.000320323
chr10	128004180	128004200	+	0.000640612
chr10	128062320	128062340	+	6.01748e-06
chr10	128062360	128062380	+	0.000218793
chr10	128063200	128063220	+	0.000640612
chr10	128113580	128113600	+	2.08079e-05
chr10	128114300	128114320	+	0.000640612
chr10	128115220	128115240	+	2.08079e-05
chr10	128116380	128116400	+	0.000640612
chr10	128138740	128138760	+	6.01748e-06
chr10	128213460	128213480	+	0.000640612
chr10	128213520	128213540	+	6.9168e-05
chr10	128213720	128213740	+	2.08079e-05
chr10	128214100	128214120	+	0.000218793
chr10	128214220	128214240	+	0.000640612
chr10	128238140	128238160	+	0.000218793
chr10	128322120	128322140	+	6.9168e-05
chr11	3049900	3049920	+	6.9168e-05
chr11	3050100	3050140	+	0.000640612
chr11	3050280	3050300	+	6.9168e-05
chr11	3050780	3050800	+	1.70931e-06
chr11	3050900	3050920	+	6.9168e-05
chr11	3050980	3051000	+	6.01748e-06
chr11	3051780	3051800	+	1.70931e-06
chr11	3051840	3051900	+	0.000227409
chr11	3051940	3052020	+	0.000375431
chr11	3052040	3052100	+	0.000119043
chr11	3222380	3222400	+	0.000218793
chr11	3518000	3518020	+	6.9168e-05
chr11	3533100	3533120	+	0.000218793
chr11	3533260	3533300	+	3.24683e-06
chr11	3540280	3540300	+	2.08079e-05
chr11	3540320	3540340	+	6.9168e-05
chr11	3541400	3541420	+	6.9168e-05
chr11	3541560	3541580	+	6.01748e-06
chr11	3541820	3541860	+	0.00032116
chr11	3542400	3542420	+	1.70931e-06
chr11	3542640	3542660	+	6.01748e-06
chr11	3542780	3542800	+	6.01748e-06
chr11	3543000	3543040	+	0.000320544
chr11	3544700	3544720	+	6.9168e-05
chr11	3545400	3545420	+	2.08079e-05
chr11	3545440	3545520	+	0.00021786
chr11	3546780	3546800	+	0.000218793
chr11	3547360	3547380	+	2.08079e-05
chr11	3547740	3547760	+	0.000640612
chr11	3547860	3547900	+	0.00033071
chr11	3548020	3548060	+	2.08079e-05
chr11	3548340	3548400	+	3.00352e-05
chr11	3807740	3807780	+	0.000320544
chr11	3812580	3812620	+	0.000320544
chr11	3812660	3812680	+	0.000640612
chr11	3813300	3813320	+	0.000640612
chr11	4224180	4224240	+	8.04367e-05
chr11	4382460	4382480	+	0.000640612
chr11	4387380	4387460	+	0.000392296
chr11	4460240	4460260	+	0.000640612
chr11	4483740	4483760	+	6.9168e-05
chr11	4725720	4725740	+	0.000640612
chr11	4882840	4882860	+	0.000640612
chr11	4961160	4961180	+	6.9168e-05
chr11	4964680	4964700	+	2.08079e-05
chr11	4967560	4967580	+	0.000218793
chr11	4980280	4980300	+	0.000640612
chr11	4981540	4981560	+	6.9168e-05
chr11	4985900	4985920	+	6.9168e-05
chr11	5051560	5051580	+	0.000640612
chr11	5092360	5092400	+	0.00014398
chr11	5092660	5092680	+	2.08079e-05
chr11	5092920	5092940	+	0.000640612
chr11	5093080	5093100	+	0.000640612
chr11	5093580	5093600	+	6.9168e-05
chr11	5093620	5093640	+	6.9168e-05
chr11	5094060	5094080	+	0.000218793
chr11	5094100	5094120	+	0.000640612
chr11	5094140	5094160	+	0.000640612
chr11	5094200	5094240	+	0.00035489
chr11	5094260	5094300	+	0.000429702
chr11	5094760	5094780	+	0.000640612
chr11	5101960	5101980	+	4.76175e-07
chr11	5103180	5103240	+	0.00043401
chr11	5300200	5300220	+	0.000218793
chr11	5322820	5322840	+	0.000218793
chr11	5328360	5328380	+	0.000218793
chr11	5328560	5328580	+	0.000218793
chr11	5453900	5453940	+	3.45885e-05
chr11	5454400	5454420	+	1.29582e-07
chr11	5454520	5454540	+	0.000640612
chr11	5454680	5454700	+	2.08079e-05
chr11	5454840	5454860	+	6.9168e-05
chr11	5455720	5455740	+	0.000218793
chr11	5456020	5456040	+	0.000640612
chr11	5616160	5616180	+	0.000218793
chr11	5618020	5618040	+	2.08079e-05
chr11	5628580	5628600	+	0.000640612
chr11	5646280	5646300	+	0.000218793
chr11	6148800	6148820	+	0.000640612
chr11	6370720	6370740	+	0.000640612
chr11	6372220	6372240	+	0.000640612
chr11	6372320	6372360	+	0.000320544
chr11	6373160	6373180	+	2.33391e-09
chr11	6373440	6373460	+	6.9168e-05
chr11	6373900	6373920	+	1.70931e-06
chr11	6374200	6374220	+	1.29582e-07
chr11	6374460	6374480	+	1.70931e-06
chr11	6374820	6374840	+	0.000218793
chr11	6374880	6374900	+	6.01748e-06
chr11	6375080	6375100	+	2.08079e-05
chr11	6375300	6375320	+	0.000640612
chr11	6375400	6375420	+	6.9168e-05
chr11	6375700	6375720	+	6.9168e-05
chr11	6428060	6428080	+	0.000218793
chr11	6428120	6428160	+	1.12586e-05
chr11	6436800	6436820	+	0.000640612
chr11	6649460	6649480	+	0.000218793
chr11	6649620	6649640	+	6.01748e-06
chr11	6651640	6651660	+	6.01748e-06
chr11	6651940	6651960	+	1.70931e-06
chr11	6652220	6652240	+	2.08079e-05
chr11	6652660	6652680	+	0.000640612
chr11	6652940	6652960	+	0.000218793
chr11	6653020	6653060	+	0.000218793
chr11	6653100	6653120	+	0.000218793
chr11	6653260	6653280	+	2.08079e-05
chr11	6654520	6654580	+	3.69279e-05
chr11	6654740	6654760	+	1.70931e-06
chr11	6654820	6654840	+	6.9168e-05
chr11	6654960	6654980	+	2.08079e-05
chr11	6656200	6656240	+	0.000429702
chr11	6656820	6656860	+	3.75927e-05
chr11	6657900	6657920	+	0.000218793
chr11	6680600	6680620	+	6.9168e-05
chr11	6735940	6735960	+	4.76175e-07
chr11	8283220	8283240	+	0.000640612
chr11	8332100	8332120	+	6.9168e-05
chr11	8333140	8333160	+	0.000640612
chr11	8333400	8333420	+	0.000640612
chr11	8333520	8333560	+	0.000109461
chr11	8333620	8333640	+	0.000218793
chr11	8333720	8333740	+	1.70931e-06
chr11	8334460	8334480	+	6.01748e-06
chr11	8348700	8348720	+	6.9168e-05
chr11	8350880	8350900	+	0.000640612
chr11	8353140	8353160	+	2.08079e-05
chr11	8392820	8392840	+	0.000640612
chr11	8393220	8393240	+	0.000218793
chr11	8408760	8408780	+	0.000640612
chr11	8429680	8429700	+	0.000218793
chr11	8440520	8440540	+	6.9168e-05
chr11	8452500	8452520	+	0.000640612
chr11	8492160	8492180	+	0.000640612
chr11	8550460	8550480	+	6.9168e-05
chr11	8551780	8551820	+	0.000323315
chr11	8552400	8552420	+	0.000640612
chr11	8553440	8553460	+	0.000218793
chr11	8554120	8554140	+	6.01748e-06
chr11	8554180	8554200	+	0.000218793
chr11	8554300	8554320	+	6.9168e-05
chr11	8554900	8554920	+	0.000640612
chr11	8556660	8556680	+	6.01748e-06
chr11	8558160	8558180	+	0.000218793
chr11	8563980	8564000	+	2.08079e-05
chr11	9869080	9869100	+	6.9168e-05
chr11	9869140	9869160	+	0.000218793
chr11	10633380	10633400	+	0.000640612
chr11	10910180	10910200	+	0.000218793
chr11	11691000	11691020	+	0.000218793
chr11	12275140	12275160	+	0.000218793
chr11	12301000	12301020	+	0.000218793
chr11	12836880	12836940	+	3.19978e-05
chr11	12837040	12837060	+	2.08079e-05
chr11	17826220	17826240	+	9.0622e-09
chr11	17874240	17874260	+	0.000640612
chr11	17874380	17874400	+	0.000640612
chr11	18225600	18225620	+	0.000640612
chr11	18914280	18914300	+	6.9168e-05
chr11	18918400	18918420	+	0.000218793
chr11	19991300	19991320	+	6.01748e-06
chr11	20140280	20140300	+	6.9168e-05
chr11	20140440	20140460	+	0.000218793
chr11	20208480	20208500	+	0.000640612
chr11	20217520	20217540	+	0.000640612
chr11	20234860	20234880	+	6.9168e-05
chr11	20234920	20234940	+	0.000640612
chr11	20235120	20235140	+	6.01748e-06
chr11	20235160	20235180	+	0.000640612
chr11	20235260	20235320	+	0.00045013
chr11	20235400	20235420	+	2.08079e-05
chr11	20235520	20235540	+	6.9168e-05
chr11	20747600	20747620	+	0.000218793
chr11	20747760	20747780	+	6.9168e-05
chr11	21582460	21582480	+	2.08079e-05
chr11	21583220	21583240	+	2.08079e-05
chr11	21583560	21583580	+	6.01748e-06
chr11	21583880	21583900	+	0.000218793
chr11	22525860	22525880	+	0.000640612
chr11	22735840	22735860	+	6.9168e-05
chr11	22736240	22736280	+	3.75927e-05
chr11	23379640	23379660	+	6.01748e-06
chr11	23449240	23449260	+	0.000218793
chr11	25096380	25096400	+	6.01748e-06
chr11	26382380	26382400	+	9.0622e-09
chr11	26494480	26494500	+	0.000218793
chr11	27226260	27226280	+	0.000640612
chr11	28745740	28745760	+	0.000640612
chr11	29072320	29072340	+	0.000218793
chr11	29277100	29277120	+	0.000640612
chr11	29366260	29366280	+	2.08079e-05
chr11	29367840	29367860	+	0.000640612
chr11	29434900	29434920	+	6.01748e-06
chr11	29446740	29446760	+	0.000640612
chr11	29501920	29501940	+	1.70931e-06
chr11	29502140	29502180	+	0.000429702
chr11	29582880	29582900	+	0.000218793
chr11	30000400	30000420	+	0.000218793
chr11	30000460	30000480	+	0.000640612
chr11	30000660	30000680	+	0.000218793
chr11	30004760	30004780	+	6.9168e-05
chr11	30008120	30008140	+	6.01748e-06
chr11	30017740	30017760	+	1.70931e-06
chr11	30021020	30021040	+	6.9168e-05
chr11	30035940	30035960	+	0.000640612
chr11	30036920	30036940	+	6.9168e-05
chr11	30037120	30037140	+	6.9168e-05
chr11	30037200	30037240	+	0.00014398
chr11	30038440	30038460	+	0.000640612
chr11	30038660	30038680	+	2.08079e-05
chr11	30038820	30038840	+	1.70931e-06
chr11	30039040	30039060	+	0.000640612
chr11	30039400	30039420	+	0.000640612
chr11	30042380	30042400	+	6.9168e-05
chr11	30044100	30044120	+	6.01748e-06
chr11	30049520	30049540	+	0.000218793
chr11	30054240	30054260	+	6.9168e-05
chr11	30066060	30066080	+	0.000218793
chr11	30463000	30463020	+	2.08079e-05
chr11	31453980	31454000	+	6.01748e-06
chr11	31757000	31757020	+	0.000218793
chr11	32939200	32939220	+	0.000640612
chr11	32939460	32939500	+	4.4988e-05
chr11	33060340	33060360	+	2.08079e-05
chr11	33062980	33063020	+	4.4988e-05
chr11	33063040	33063060	+	2.33391e-09
chr11	33655060	33655080	+	0.000640612
chr11	34780680	34780700	+	0.000640612
chr11	36187600	36187620	+	0.000640612
chr11	38611660	38611680	+	2.08079e-05
chr11	38611700	38611720	+	1.70931e-06
chr11	38611740	38611760	+	4.76175e-07
chr11	39490200	39490220	+	0.000640612
chr11	39793460	39793500	+	0.00032116
chr11	39955380	39955400	+	0.000218793
chr11	40382820	40382840	+	6.01748e-06
chr11	40440900	40440920	+	0.000640612
chr11	40486960	40486980	+	1.70931e-06
chr11	40523540	40523560	+	0.000640612
chr11	40523600	40523620	+	2.08079e-05
chr11	40535500	40535520	+	0.000640612
chr11	42853080	42853100	+	0.000640612
chr11	44276040	44276080	+	0.000429702
chr11	44276280	44276320	+	0.000218793
chr11	44341160	44341180	+	0.000640612
chr11	46079800	46079820	+	6.01748e-06
chr11	46264540	46264580	+	0.000110251
chr11	48565640	48565660	+	0.000640612
chr11	48565820	48565840	+	3.45468e-08
chr11	48566660	48566700	+	2.08079e-05
chr11	48566820	48566840	+	0.000640612
chr11	48566880	48566900	+	0.000218793
chr11	48620580	48620600	+	0.000218793
chr11	48629620	48629640	+	0.000218793
chr11	48630120	48630140	+	4.76175e-07
chr11	48630620	48630640	+	3.45468e-08
chr11	48639520	48639540	+	6.9168e-05
chr11	48639580	48639600	+	0.000640612
chr11	48647380	48647400	+	6.9168e-05
chr11	48647420	48647440	+	9.0622e-09
chr11	48647960	48647980	+	0.000218793
chr11	48670520	48670540	+	1.47203e-10
chr11	48708640	48708660	+	6.01748e-06
chr11	49488720	49488740	+	0.000640612
chr11	49492260	49492280	+	1.70931e-06
chr11	50020760	50020780	+	6.9168e-05
chr11	50021320	50021340	+	1.70931e-06
chr11	50071960	50071980	+	0.000640612
chr11	50077560	50077580	+	0.000640612
chr11	50079340	50079360	+	0.000640612
chr11	50108840	50108860	+	6.01748e-06
chr11	50109720	50109740	+	1.70931e-06
chr11	50125100	50125120	+	4.76175e-07
chr11	51446520	51446540	+	0.000218793
chr11	51551300	51551320	+	6.01748e-06
chr11	51582600	51582620	+	0.000218793
chr11	51804160	51804180	+	4.76175e-07
chr11	53075140	53075160	+	6.9168e-05
chr11	53873220	53873240	+	0.000218793
chr11	54779560	54779580	+	0.000640612
chr11	54792860	54792880	+	1.70931e-06
chr11	54792900	54792920	+	0.000640612
chr11	54796820	54796840	+	0.000640612
chr11	54805800	54805820	+	0.000640612
[truncated: 27,110 more rows]

## Sheet: ASC LACE-seq gene
Supplementary Table S2. LACE-seq profiling of YTHDC1 binding in ASC and C2C12 myoblasts.
YTHDC1 binding genes in ASC48h.
Chromosome	Begin	End	Name
chr7	53698529	53895177	Sergef
chr5	123794457	123824092	Bcl7a
chr15	10376518	10400271	Dnajc21
chr4	42535974	42748396	Fam205a4
chr1	136543189	136649726	Syt2
chr15	102046426	102062366	Itgb7
chr6	132064239	132314153	Gm4736
chr2	30141936	30199786	Nup188
chr11	102889857	102930222	Nmt1
chr5	118316848	118408849	Nos1
chr19	5795690	5802672	Malat1
chr4	10435178	10724949	1700123O12Rik
chr7	140178694	140315166	Ctbp2
chr11	65644826	65982053	Dnah9
chr8	77972593	78508406	Iqcm
chr14	51427122	51427446	Rpph1
chr6	144942355	145024677	Bcat1
chr10	122115818	122382849	Ppm1h
chr9	102488908	102528454	Cep63
chr1	172949057	172959892	Fcgr4
chr5	148768896	149127641	Mtus2
chr4	125167940	125391417	Grik3
chr4	118727395	118741716	Gm12866
chr4	12067264	12073892	Rbm12b1
chr11	77499641	77531468	Nufip2
chr6	135663239	136123563	Grin2b
chr18	62708565	62821042	Spink10
chr5	136724005	137043360	Cux1
chr13	109444371	110746177	Pde4d
chr2	121781737	121841062	Ctdspl2
chr6	30697554	30846794	Copg2
chr13	104381475	104497713	Gm30551
chr3	34598562	34615584	Gm3143
chr7	151361365	151610399	Shank2
chr16	73892551	75093015	Robo2
chr7	132784468	132851202	Gtf3c1
chr13	55445194	55464144	Lman2
chr17	14416513	14541797	Smoc2
chr6	28430348	28838832	Snd1
chr6	136645805	136730263	Gucy2c
chr2	5819106	5863838	Dhtkd1
chr11	120241112	120299014	Nploc4
chr19	26679650	26852811	Smarca2
chr14	57505440	57581195	Zmym2
chr6	118537258	119146427	Cacna1c
chr6	48080905	48345407	Gm16630
chr4	148550428	148681842	Kif1b
chr17	3326573	3519397	Tiam2
chr5	113339498	113444558	Grk3
chr6	23212774	23789421	Cadps2
chr3	95057596	95085998	Prune1
chr9	120842518	120869625	Ctnnb1
chr7	116422730	116582567	Stk33
chr2	162769201	162802863	L3mbtl1
chr1	108616987	108656319	Kdsr
chr4	108132031	108232020	Tut4
chr18	53335946	53380520	Snx2
chr12	9036803	9043200	Ttc32
chr11	86940577	87064362	Trim37
chr8	28196313	28233908	Adgra2
chr3	82161994	82199190	Map9
chr9	89949105	89970933	Ctsh
chr13	105421220	105607033	Cwc27
chr2	31101443	31150991	Ncs1
chr9	120873572	121186290	Ulk4
chr2	11393058	11475556	Pfkfb3
chr13	120123124	120197818	Nnt
chr14	27457620	27476328	Arf4
chr7	133245233	133344015	Xpo6
chr17	35087181	35089416	1110038B12Rik
chr14	61253542	61383393	Spata13
chr3	96149210	96162402	Platr30
chr1	173300304	173318418	Nectin4
chr8	11728058	11835217	Arhgef7
chr1	88051355	88174859	Armc9
chr19	54018796	54107768	Shoc2
chr12	117724193	118516640	Ptprn2
chr8	126545397	126572405	Urb2
chr16	63543358	63864001	Epha3
chr4	106334413	106351549	Ttc4
chr5	77269624	77302579	C530008M17Rik
chr11	113106169	113511406	Slc39a11
chr5	103337568	103640353	Mapk10
chr9	106786316	106789331	Rbm15b
chr1	57257489	57271840	BC055402
chr8	111599122	111777539	D030068K23Rik
chr7	91394785	91558548	Arnt2
chr10	39721379	39745074	Mfsd4b1
chr13	23368073	23405276	4930557F10Rik
chr12	25516464	25645164	Mboat2
chr1	4763279	4775807	Mrpl15
chr14	122883587	123289166	Pcca
chr3	116562485	116606668	Frrs1
chr1	169156217	169215258	Uck2
chr1	16056060	16083406	4930444P10Rik
chr7	29573988	29583984	Rinl
chr7	16523185	16531457	Nop53
chr13	9875859	10360049	Chrm3
chr2	30271570	30303327	Ptpa
chr11	59355071	59380455	Nlrp3
chr2	58998907	59193262	Pkp4
chr12	110098240	110132384	Wars
chr8	116963552	117876612	Wwox
chr15	54670456	54751701	Enpp2
chr11	109886948	109957251	Abca8a
chr4	57203713	57314709	Ptpn3
chr11	4847524	4942797	Ap1b1
chr7	89484204	89762958	Adamtsl3
chr9	59236361	59334181	Arih1
chr12	8535289	8605872	Slc7a15
chr13	18809161	18958680	Vps41
chr19	8967477	8972380	Ints5
chr12	56403624	56483478	Prorp
chr10	23505561	23505627	Snord100
chr14	12386067	13074553	Ptprg
chr2	44839032	44972962	Zeb2
chr15	85036438	85116724	Fbln1
chr1	183282759	183390772	Cnih3
chr6	92320886	92656178	Prickle2
chr9	122758028	122775124	Zfp445
chr15	97684858	97738727	Vdr
chr5	137458064	137463829	Znhit1
chr1	186610646	186635179	Mtarc1
chr6	30683506	30698466	Mest
chr4	35653897	36898777	Lingo2
chr2	179911078	179960564	Lama5
chr2	106533338	106708517	Mpped2
chr14	105038361	105366000	D130009I18Rik
chr18	65047410	65377480	Nedd4l
chr5	131913203	133019090	Auts2
chr15	84493636	84536832	Prr5
chr6	105627661	106650129	Cntn4
chr17	75404869	75791852	Ltbp1
chr18	12348203	12394895	Npc1
chr3	152009442	152056578	Usp33
chr12	104187069	104422207	Unc79
chr9	117949640	117978912	Azi2
chr3	96042402	96043065	H3c14
chr9	111463941	111592852	Stac
chr13	23643155	23643537	H4c6
chr6	100654728	100755075	Gxylt2
chr3	67696142	68430404	Iqschfp
chr2	6460744	7317825	Celf2
chr12	83717912	84263043	Rgs6
chr2	179646851	179711351	Taf4
chr6	142959440	143048672	C2cd5
chr7	52382234	52382315	Snord33
chr11	67140605	67185089	Myh13
chr1	75432511	75439754	Gmppa
chr7	119259533	119302996	Dkk3
chr16	57302113	57606980	Cmss1
chr7	130422663	130513429	Arhgap17
chr11	88152884	88579591	Msi2
chr5	118514990	118605467	Fbxw8
chr12	82298902	82434167	Slc8a3
chr8	22887027	22905657	Defb1
chr9	50302630	50313744	Plet1
chr1	74283091	74314783	Arpc2
chr12	103521284	103629064	Rin3
chr4	87415829	87679311	Mllt3
chr4	122960154	122976168	Pabpc4
chr9	68501593	69236053	Rora
chr16	59491914	59600873	Crybg3
chr3	45084361	45182182	2610316D01Rik
chr3	138868857	139373263	Stpg2
chr5	135058560	135074198	Rfc2
chr2	10016218	10052310	Itih2
chrX	67712928	67730355	Tmem185a
chr11	44332458	44379022	Rnf145
chrX	6735538	6896484	Clcn5
chr6	52258383	52264826	Evx1os
chr1	58267241	58325440	Aox4
chr12	109148613	109241624	Bcl11b
chr5	143664794	143668433	Actb
chr19	14522562	14672673	Tle4
chr14	73542317	73583861	Rcbtb2
chr4	42683822	42884678	4930578G10Rik
chr1	73956806	74171122	Tns1
chr9	63984951	64020738	Zwilch
chr3	122779437	122939067	Synpo2
chr7	117451527	117758434	Sbf2
chr17	75117090	75262910	Ttc27
chr8	3457106	3467648	Pex11g
chr5	137537376	137548142	Serpine1
chr10	25079604	25243324	Epb41l2
chr9	101824458	102257023	Ephb1
chr9	54452804	54509692	Acsbg1
chr19	59047848	59150559	Shtn1
chr3	19408595	19510862	Dnajc5b
chr14	5468460	6240637	LOC100861615
chr4	58810106	58925621	Ecpas
chr2	44419932	44783237	Gtdc1
chr18	74938866	74965861	Acaa2
chr18	61959046	62071506	Ablim3
chr13	21809497	21809984	H3c10
chr11	113064629	113070983	4732490B19Rik
chr10	116423370	116462096	Best3
chr2	30881726	30997528	Fnbp1
chr17	29293466	29374735	Cpne5
chr7	152368915	152469916	Tpcn2
chr1	34592493	34601156	Cfc1
chr19	6919113	6932701	Ccdc88b
chrX	133649936	133654865	Esx1
chr13	23653344	23654254	H3c6
chr12	81891519	81981820	Susd6
chr2	119577062	119586167	Ltk
chr10	58276107	58601664	Sh3rf3
chr3	122636519	122687365	Usp53
chr2	125809219	125977740	Fam227b
chr9	119392526	119488134	Scn5a
chr16	17152108	17201585	Ube2l3
chr1	63094375	63160841	Ino80d
chr12	78038256	78063235	Max
chr17	27559333	27640478	Grm4
chr6	83187369	83254939	Slc4a5
chrX	92907017	93126427	Zc3h12b
chr11	107593671	107656020	Cacng4
chr9	108107192	108166289	Dag1
chr17	26125981	26206463	Rab11fip3
chr9	8076632	8134446	Cep126
chr17	33879429	33897431	Rab11b
chrX	91434048	91457990	Eif2s3x
chr1	33965070	34365507	Dst
chr2	169458009	169898250	Tshz2
chr13	23667632	23668135	H3c4
chr9	123276045	123371793	Lars2
chr10	6179460	6373466	Mthfd1l
chr5	21390272	21850523	Reln
chr6	86477324	86514443	1600020E01Rik
chr5	53947018	54048684	Rbpj
chr13	23548862	23557770	Btn1a1
chr2	20769546	20889348	Arhgap21
chr5	20930721	20987942	Fam185a
chr3	79259893	79371601	Fnip2
chr17	45871455	45918201	F630040K05Rik
chr5	73411430	73647857	Fryl
chr2	109757804	109854414	Lgr4
chr2	117956004	118082692	Fsip1
chr19	24752751	24936332	Pgm5
chr1	59573108	59691353	Gm973
chr5	124027803	124134370	Clip1
chr11	121372290	121380656	Zfp750
chr4	63075944	63157025	Whrn
chr12	87165870	87394710	Ttll5
chr13	21925612	21929399	Hist1h2br
chr5	122814593	122822351	Fam216a
chr5	116575590	116738994	Ccdc60
chr2	161347724	162486883	Ptprt
chr15	78586313	78603875	Mfng
chr5	135663193	135721999	Baz1b
chr1	120730638	120950196	Gli2
chr4	119487283	119808016	Hivep3
chr13	28234353	28243464	Prl5a1
chr8	32260333	32260430	Snord13
chr3	104597750	104621481	Mov10
chr7	127064848	127238811	Dnah3
chr13	18216794	18473873	Pou6f2
chr3	32846848	33042113	Pex5l
chr3	156224758	156979428	Negr1
chr4	41238333	41261934	Dcaf12
chr13	95794060	96020291	Pde8b
chr2	120802798	120833578	Tmem62
chr5	116015272	116072663	Gcn1
chr1	157692094	157820385	Cep350
chr6	115568589	115626653	Raf1
chr2	113167893	113556924	Fmn1
chr6	98875336	99470987	Foxp1
chr7	146575008	146765551	Inpp5a
chr9	73327231	73816844	Unc13c
chr10	23504989	23507015	Rps12
chr10	74523641	74647668	Bcr
chr5	134659908	134694013	Gtf2ird2
chr5	119010728	119215446	Med13l
chr1	59821123	59934925	Bmpr2
chr13	39024001	39052748	Slc35b3
chr2	94140923	94246846	Ttc17
chr11	116664714	116689360	Mxra7
chr11	82617321	82684712	Rffl
chr10	17775746	17844961	Reps1
chrX	70237418	70237483	Mir2137
chr6	4455618	4491543	Col1a2
chr19	45892634	46072978	Armh3
chr5	118640745	118695034	Rnft2
chr5	150331254	150414469	Wdr95
chr15	76875706	76887538	Apol6
chr17	34807480	34856760	Tnxb
chr14	75154480	75347684	Lrch1
chr11	121313305	121478484	Tbcd
chr18	82644515	82755029	Mbp
chr17	47277891	47499274	Trerf1
chr17	71965555	72008371	Wdr43
chr9	75234589	75257823	Mapk6
chr9	88736636	88753708	9330159M07Rik
chr19	37000569	37088547	Btaf1
chr2	155897577	155937701	Cpne1
chr1	153191616	153211574	Ivns1abp
chr12	4247362	4484060	Ncoa1
chr4	81936077	82151683	Nfib
chr2	71711281	71741915	Pdk1
chr1	32229567	32715414	Khdrbs2
chr10	59765498	60159238	Cdh23
chr11	80693667	81781898	Asic2
chr15	98538625	98553771	Ccdc65
chr8	23769677	23817055	Ikbkb
chr1	12856631	12981216	Slco5a1
chr19	40227851	40261776	Cyp2c70
chr18	34602005	34666477	Fam13b
chr11	9091945	9584262	Abca13
chr10	18127481	18253697	Nhsl1
chr16	10281842	10314061	Emp2
chr4	41763294	42104673	Gm3893
chr6	108527030	108610928	0610040F04Rik
chr14	27957179	28217097	Arhgef3
chr13	53204686	53381493	Ror2
chr5	53498322	53604691	Sel1l3
chr2	155920618	155937701	Rbm12
chr16	94592346	94690828	Ttc3
chr5	77017724	77075491	Cep135
chr14	33669942	33752677	Vstm4
chr9	28802334	29770854	Ntm
chr2	158179436	158187258	Snhg17
chrX	149044052	149204029	Shroom2
chr9	105064797	105297617	Nek11
chr4	125781201	125818273	Stk40
chr6	17026261	17121833	Gm4876
chr13	21874784	21875266	H3c11
chr10	29172913	29255673	Rspo3
chr6	4852975	5115661	Ppp1r9a
chr12	80062782	80108264	Tmem229b
chr6	39553237	39675462	Braf
chr16	18348275	18407167	Arvcf
chr9	62267299	62384851	Coro2b
chr10	44156980	44178554	Prdm1
chr1	191552147	191700572	Ptpn14
chr6	27225121	28085146	Grm8
chr13	45485111	45507309	Mylip
chr15	81846799	81870514	Xrcc6
chr10	80128063	80139038	Mknk2
chr15	79908933	79909009	Snord83b
chr15	102537208	102552609	Calcoco1
chr4	116550007	116661710	Zswim5
chr4	100741643	100824975	Raver2
chr15	103021977	103070283	Cbx5
chr17	45528839	45570656	Cdc5l
chr6	50060240	50148597	Mpp6
chr8	14095875	14847686	Dlgap2
chr11	95720131	95722360	4833417C18Rik
chr7	116154394	116177973	Tub
chr6	83312368	83406386	Tet3
chr4	113150496	113672108	Skint5
chr6	79768025	79768358	Gm20594
chr6	148180952	148392874	Tmtc1
chr18	44584714	44971836	Mcc
chr13	23853754	23854255	H3c1
chr11	96325905	96620936	Skap1
chr11	33529341	33893193	Kcnip1
chr11	61329385	61393189	Epn2
chr2	144091718	144091938	Snord17
chr5	125956243	125997775	Aacs
chr7	71031237	71083801	Klf13
chr4	33295966	33320318	Srsf12
chr1	195047835	195090239	Hsd11b1
chr4	98603350	98787606	Dock7
chr8	97501009	97538108	Adgrg1
chr10	99478455	99563049	Kitl
chr13	44826143	45017012	Jarid2
chr5	111308822	111718799	Ttc28
chr17	30352469	30713232	Btbd9
chr13	100718487	100785594	Mccc2
chr6	37933739	37996996	Svopl
chr3	37318872	37478018	Spata5
chr2	118214353	118300970	Eif2ak4
chr16	8688815	8738435	Usp7
chr7	52825523	52845080	Bcat2
chr7	127986345	128050733	Eef2k
chr17	68623137	69129426	L3mbtl4
chr1	63229145	63260855	Gpr1
chr3	96237711	96256229	BC107364
chr9	99529950	99570494	Dzip1l
chr17	5492600	5753891	Zdhhc14
chr2	166773049	166821799	Stau1
chr14	39182137	40286376	Nrg3
chr11	4969690	4999099	Ewsr1
chr7	16524111	16524209	Snord23
chr13	91600702	91845780	Ssbp2
chr9	55397686	55785926	Scaper
chr9	114420391	114473487	Trim71
chr7	19813738	19832166	Opa3
chr8	129587956	130136186	Pard3
chr11	17059301	17100383	Ppp3r1
chr17	35754868	35763582	Gm9573
chr8	108160438	108206822	Ctcf
chr7	125883785	125985005	Vps35l
chr3	88769734	88883297	Ash1l
chr5	123465083	123480461	Orai1
chr6	127911414	128093596	Tspan9
chr9	77765172	77832326	Elovl5
chr7	141862370	142365330	Dock1
chr3	137752819	137806382	Mttp
chr17	73655804	73748636	Capn13
chr16	4886100	4938296	Mgrn1
chr11	109434835	109472703	Wipi1
chr11	57458944	57601002	Galnt10
chr17	26813341	26836591	Atp6v0e
chr4	101927544	102279867	Pde4b
chr11	45793812	45831494	Sox30
chr10	118891090	119524316	Grip1
chr2	44966658	44969604	Zeb2os
chr7	122614386	123182258	Sox6
chr1	175350735	175396167	Aim2
chr6	87792609	87801100	Cnbp
chr3	28162136	28569507	Tnik
chr11	62416379	62418308	2410006H16Rik
chr7	63305525	63487168	Herc2
chr18	67825155	67884275	Ptpn2
chr15	53293356	53733991	Samd12
chr4	32891010	33037801	Ankrd6
chr8	119619765	119657620	Bco1
chr8	68141939	68995536	Marchf1
chr12	30859347	31058241	Sntg2
chr2	59737420	59963797	Baz2b
chr18	35062439	35091657	Etf1
chr9	50296904	50312910	Plet1os
chr4	119212266	119301724	Foxj3
chr5	124454650	124482269	Vps37b
chr11	94418416	94463100	Acsf2
chr11	51505765	51570336	Sec24a
chr10	128134995	128142107	Cdk2
chr13	23776068	23784349	H2bc4
chr10	53256121	53349763	Mcm9
chr5	130732907	130817437	Tyw1
chr13	77847951	78305501	Fam172a
chr14	41807024	41827122	Prxl2a
chr10	88916979	88996367	Nr1h4
chrX	70232678	70276882	Zfp185
chr10	39978274	39978485	Rnu3a
chr8	23393913	23481890	Tpte
chr2	68048504	68310038	Stk39
chr12	36741142	36769065	Tspan13
chr4	86629030	86876444	Slc24a2
chr16	5884886	7412573	Rbfox1
chr19	3454928	3575749	Ppp6r3
chr9	113966472	114007851	Susd5
chr5	7960472	7982213	Steap4
chr1	64835695	65003398	Plekhm3
chr3	23697025	24682928	Naaladl2
chr10	6379239	6606164	Plekhg1
chr6	29997988	30103458	Nrf1
chr17	56219054	56240027	Hdgfl2
chr6	125640437	125990146	Ano2
chr6	145880393	145913745	Sspn
chr4	141400236	141402905	Ctrcos
chr16	50191957	50432579	Bbx
chr12	52694328	52706760	Coch
chr15	63918402	64214481	Asap1
chr7	105739116	105805079	Emsy
chr17	23889762	23908569	Flywch1
chr14	22838934	23875310	Lrmda
chr3	96359691	96370724	Gm15441
chr12	75098764	75368903	Syt16
chr9	96585842	96632094	Zbtb38
chr16	44240293	44332951	Sidt1
chr9	88415891	88417735	Snhg5
chr5	30431736	30444920	Garem2
chr19	42357525	42506278	Crtac1
chr1	66221903	66489157	Map2
chrX	51539329	51851189	Gm14595
chr13	20182376	20700222	Elmo1
chr17	11033225	12256232	Prkn
chr4	150433632	151235877	Camta1
chr14	29718129	30535050	Cacna2d3
chr1	180882091	181448172	Smyd3
chr10	4795849	5326342	Syne1
chr4	131864593	131866939	Snhg12
chr8	3803125	3803359	Rprl3
chr11	69234311	69362610	Dnah2
chr15	86044889	86328933	Tbc1d22a
chr4	122624094	122638431	Mfsd2a
chr2	37298805	37421957	Rabgap1
chr8	60002622	60131852	Galnt7
chr11	58762413	58762874	H2bu2
chr6	117850358	117875640	Hnrnpf
chr8	38585608	39724562	Sgcz
chr15	93228781	93322343	Pphln1
chr15	100446093	100451192	Dazap2
chr5	31916324	31925017	Mrpl33
chr4	153690234	154010982	Prdm16
chr9	65208836	65228184	Ubap1l
chr13	104608866	104710666	Erbin
chr2	28368687	28408602	Ralgds
chr12	70994092	71065072	Atl1
chr10	101144121	101854102	Mgat4c
chr19	44079512	44103737	Cyp2c23
chr14	31944275	31952310	Nt5dc2
chr6	140372620	140543427	Plekha5
chr19	22213536	23069900	Trpm3
chr1	140860286	141072619	Dennd1b
chr14	24953175	25065142	Dlg5
chr4	44769431	44945086	Zcchc7
chr7	129250776	129276460	Palb2
chr6	100521805	100621151	Shq1
chr11	106681375	106782029	Smurf2
chr17	85489966	85857929	Camkmt
chr1	190794975	190831719	Kctd3
chr14	31528035	31635907	Sfmbt1
chr2	28555681	28668685	Ak8
chr12	80398269	80915677	Rad51b
chr7	10512973	10538934	Vmn2r48
chr18	13130432	13151459	Impact
chr5	116295665	116456350	Cit
chr1	74760109	74784471	Cyp27a1
chr18	7088231	7297934	Armc4
chr11	5613420	5662379	Urgcp
chr3	17971950	18143338	Cyp7b1
chr15	82980075	82980224	Rnu12
chr10	59165311	59326882	Micu1
chr16	57353390	57572917	Filip1l
chr1	120524522	120581745	Tfcp2l1
chr13	29998444	30077932	E2f3
chr16	42907758	43619236	Zbtb20
chr9	88442858	88465924	Zfp949
chr3	96042402	96043050	H3c15
chr7	125999266	126115634	Iqck
chr7	134804968	134852280	Bcl7c
chr10	94943439	94964583	Mrpl42
chr12	112232608	112252082	6030440G07Rik
chr2	3938729	4535089	Frmd4a
chr4	99768396	100117411	Ror1
chr7	96288532	96552732	Tmem135
chr5	67137128	67448398	Limch1
chr16	87699199	87733591	Bach1
chr11	82594611	82617776	Lig3
chr3	96180956	96188473	Gm26689
chr9	45178268	45204242	Fxyd6
chr13	97946286	97968312	Hexb
chr7	54015836	54051251	Hps5
chr9	119147551	119231545	Oxsr1
chr6	49035217	49164953	Igf2bp3
chr10	25710989	25798858	Tmem200a
chr9	21125163	21159472	Slc44a2
chr2	90750870	90758207	Ptpmt1
chrX	132779619	132781678	Tceal9
chr2	52716902	52993236	Fmnl2
chr9	114284249	114299830	Crtap
chr10	85511491	85961641	Syn3
chr7	140319934	140334140	4930483O08Rik
chr2	54288798	54970155	Galnt13
chrX	10062242	10173730	Tspan7
chr14	63456527	63575723	Wdfy2
chr13	23836911	23837390	H3c3
chr16	37868486	37888943	Lrrc58
chr8	114413035	114434099	Chst5
chr1	7079001	7163709	Pcmtd1
chr14	34958832	34965605	Npy4r
chr11	97943868	98010930	Fbxl20
chr19	25311465	25508988	Kank1
chr14	19406080	19726781	Ube2e2
chr16	81200942	81624532	Ncam2
chr3	67868724	68430404	Schip1
chr2	32731654	32780773	Fam129b
chr11	18965278	18975743	4933406G16Rik
chr2	119063096	119075249	Spint1
chr5	122872453	122894920	Anapc7
chr1	43990839	44059845	Tpp2
chr8	47637423	47665922	Cenpu
chr2	22149130	22473772	Myo3a
chr14	21748620	21852898	Vcl
chr11	48639640	48663697	Trim7
chr12	21396190	21423297	Ywhaq
chr7	73403633	73533227	Lrrk1
chr12	88362290	88432772	Tmem63c
chr1	21388480	21952731	Kcnq5
chr5	110425529	110439427	Zfp932
chr8	124806041	124861762	Zfpm1
chr2	16277931	16677466	Plxdc2
chr11	75859728	75993140	Vps53
chr16	44724414	44737397	Nepro
chr1	89223573	89347385	Gigyf2
chr1	37811417	37921927	Tsga10
chr10	104624720	105011535	Tmtc2
chr3	86028612	86586616	Lrba
chr2	104266639	104334646	Hipk3
chr12	7984483	8023645	Apob
chr8	109206968	109375339	Tango6
chr2	112079998	112087268	Lpcat4
chr11	87218567	87369325	Tex14
chr4	154243694	154269639	Mmel1
chr15	10106993	10266775	Prlr
chr7	109029839	109048059	Anapc15
chr5	149931141	149993612	Mm2pr
chr12	118472994	118575485	Gm5441
chr8	113142467	113244298	Vac14
chr6	125165599	125172324	Vamp1
chr10	36226613	36554200	Hs3st5
chr7	119571220	119735202	Parva
chr17	57205478	57217933	Dennd1c
chr17	52022052	52104582	Gm20098
chr7	104937051	105060891	Pak1
chr19	12936267	12937226	Olfr1444
chr11	118351074	118772911	Rbfox3
chr5	125866335	125870387	Ubc
chr3	66789584	67162325	Rsrc1
chr4	100824579	100937887	Jak1
chr10	5958433	5979467	Zbtb2
chr18	67247952	67386445	Gnal
chr19	6363690	6378038	Sf1
chr1	95302517	95375494	Hdlbp
chr15	74346626	74419894	Adgrb1
chr5	110790771	110877522	Fbrsl1
chr2	36085946	36107791	Ptgs1
chr2	40452293	42509118	Lrp1b
chr5	93522442	93610404	Septin11
chr6	31469493	31513937	Podxl
chr17	80428827	80461608	Hnrnpll
chrX	141724902	141783482	Lhfpl1
chr10	127985166	127986224	Rpl41
chr9	110034528	110142682	Smarcc1
chr8	63471990	63610143	Nek1
chr1	180459256	180862988	Kif26b
chr6	50243326	50406353	Osbpl3
chrX	47135714	47150922	Igsf1
chr13	23627287	23627778	H3c8
chr7	99792222	99818422	Pcf11
chr15	78497763	78549201	Elfn2
chr18	75178418	75446620	Dym
chr15	57075322	57309180	Slc22a22
chr17	32333217	32421078	Brd4
chr9	32711654	32736551	Gm27162
chr3	152125779	152331324	Ak5
chr2	18127960	18314457	Dnajc1
chr4	131479341	131631228	Epb41
chr1	165925020	165927376	Mettl18
chr11	98671122	98695121	Casc3
chr15	57526222	57671387	Zhx2
chr9	26904969	26963006	Jam3
chr4	43672494	43681731	Fam221b
chr19	4625841	4698668	Gm960
chr12	74685783	74879171	Prkch
chr15	58613824	58654982	Tmem65
chr2	57034242	57040668	4930555B11Rik
chr5	104291069	104340278	Klhl8
chr16	56204426	56273866	Impg2
chr4	127665288	128244900	Csmd2
chr5	117864011	118217997	Ksr2
chr15	42256213	42508523	Angpt1
chr16	76287648	76374072	Nrip1
chr10	7309598	7345275	Lrp11
chr5	104499080	104506627	Gm17660
chr7	56121799	56136966	E2f8
chr5	38918045	38952938	Wdr1
chr11	22799728	22882284	Commd1
chr11	121188517	121215761	Wdr45b
chr7	144086294	144319871	Mgmt
chr8	112302483	112388109	Ap1g1
chr15	76909420	77137483	Rbfox2
chr13	33119283	33132457	Serpinb9b
chr11	32131963	32167707	Nprl3
chr10	31409125	32609721	Nkain2
chr1	79603451	79668547	Ap1s3
chr1	179659945	179683436	1700016C15Rik
chr6	143776945	144158088	Sox5
chr4	19535446	19636151	Wwp1
chr2	4941688	4985163	Optn
chr6	29490827	29559849	Tnpo3
chr12	74224704	74374975	Mnat1
chr1	72290567	72321443	D230017M19Rik
chr5	72691264	72895779	Corin
chr1	178360242	178457400	Gm36536
chr1	139959436	140071882	Ptprc
chr11	64815541	64976463	Arhgap44
chr2	96158326	97471821	Lrrc4c
chr10	23516792	23547774	Slc18b1
chr11	54792455	54846973	Anxa6
chr18	10064399	10181790	Rock1
chr3	121461822	121518220	Abcd3
chr6	134879110	134901736	Lockd
chr14	120674891	120830920	Mbnl2
chr16	35154950	35305829	Adcy5
chr8	109034752	109080811	Cdh3
chr15	41279028	41692593	Oxr1
chr3	83964361	84108697	Trim2
chr17	43938301	44176465	Rcan2
chr12	81619458	81704885	Galnt16
chr17	6256860	6308314	Tmem181a
chr12	29375493	29435318	Trappc12
chr3	10244209	10301183	Fabp12
chr7	76640980	76644575	4930402F11Rik
chr8	25946615	26059276	Adam32
chr6	40524897	40535804	Clec5a
chr2	154262220	154365092	Cbfa2t2
chr4	128735388	128761770	Rnf19b
chr11	119352661	119372779	Endov
chr12	56381801	56403987	Ppp2r3c
chr8	70212981	70498473	Psd3
chr2	32817232	32819565	Rpl12
chr9	67064892	67407510	Tln2
chr4	43505657	43505931	Rmrp
chr4	46052094	46128904	Tmod1
chr1	80442507	80472235	1700016L21Rik
chr16	37107396	37385044	Stxbp5l
chr6	58781459	58870390	Herc3
chr18	50287855	50355924	Hsd17b4
chr5	101275248	101328121	Gpat3
chr15	12737932	12754412	6030458C11Rik
chr10	12101986	12581533	Utrn
chr7	86888049	86930836	Wdr93
chr15	63760649	63892010	Fam49b
chr5	48780742	49676898	Kcnip4
chr17	39979942	39985774	Rn45s
chr14	35339885	35401867	Ldb3
chr12	101538980	101759047	Ttc7b
chr4	116826441	116828737	Rps8
chr18	14784138	14841423	Ss18
chr18	4375590	4398796	Mtpap
chr10	120360467	120416386	Lemd3
chr10	12636444	12642925	B230208H11Rik
chr4	128896822	128938648	C77080
chr4	98393445	98405177	L1td1
chr16	44485158	44558983	Boc
chr1	121903557	121960109	Sctr
chr18	78342883	78793689	Slc14a2
chr7	87731518	87833763	Crtc3
chr4	41465962	41516560	Fam219a
chr8	87848828	87904940	Mylk3
chr4	99434097	99495849	Itgb3bp
chr1	74408682	74415895	Catip
chr4	42535974	42748396	Fam205a3
chr19	5447698	5455938	Fosl1
chr17	26275631	26332756	Axin1
chr4	131907848	131909601	Snhg3
chr4	124126869	124163202	1700057H15Rik
chr10	60561390	60610432	Sgpl1
chr1	194336710	194597413	Hhat
chr7	30601091	30617061	Zfp790
chrX	51539329	51851189	Gm14590
chr13	23405394	23477668	4930586N03Rik
chr13	56390006	56397912	Cxcl14
chr7	29237257	29252567	Lrfn1
chr14	75684173	75744234	Zc3h13
chr5	103659394	103728048	4930429D17Rik
chr9	42771925	42913801	Arhgef12
chr8	114435907	114457713	Tmem231
chr18	35020861	35024610	Egr1
chr4	136203456	136391927	Ephb2
chr2	165609652	165710338	Zmynd8
chr7	116901570	116925059	Nrip3
chr14	10382608	11994549	Fhit
chr9	121665758	121669061	E530011L22Rik
chr4	107854539	107890648	Zyg11a
chr5	122310225	122499860	Cux2
chr4	108733750	108874877	Osbpl9
chr11	110260416	110386836	Map2k6
chr15	100520346	100559807	Galnt6
chr3	89743410	89767260	Atp8b2
chr11	62416962	62417023	Snord49a
chr12	71328828	71335152	F730035M05Rik
chr9	120036884	120041487	Rpsa
chr15	99223378	99240480	Tmbim6
chrX	147481713	147524229	Fgd1
chr7	137676040	137690895	Nsmce4a
chr17	22474950	22498367	Zfp944
chr10	89336254	90436045	Anks1b
chr7	117365217	117427020	Swap70
chr1	91351386	91791857	Agap1
chr10	117066556	117124408	Cpm
chr7	148545077	148551009	B230206H07Rik
chr12	72038844	72065704	Actr10
chr5	125497523	125659584	Ncor2
chr2	37654510	38142904	Dennd1a
chr3	19957811	20018377	Hltf
chr3	126624525	127202033	Ank2
chr8	23970018	24053731	Kat6a
chr1	167067984	167090904	Tbx19
chr5	20798779	20930495	Ccdc146
chr13	23844214	23844709	H3c2
chr3	89324086	89476416	Kcnn3
chr11	100931408	100938985	Naglu
chr5	136533137	136540194	Upk3bl
chr3	129617878	129673124	Mcub
chr14	79248985	79602117	Vwa8
chr4	53043661	53172767	Abca1
chr2	27741945	27895030	Col5a1
chr6	33199128	33923978	Exoc4
chr1	75268772	75274990	Resp18
chr13	111672619	111694054	4930526H09Rik
chr10	93774694	94053699	Tmcc3
chr1	38109631	38186511	Rev1
chr3	51491535	51908928	Maml3
chr2	90273046	90420804	Ptprj
chr7	51024470	51028851	Klk12
chr5	121654510	121659250	Rpl6
chr3	153636400	153934684	Slc44a5
chr9	42328495	42752454	Grik4
chr7	114738565	114888410	Ppfibp2
chr4	32504410	32673083	Bach2
chr7	85725952	85863106	E430016F16Rik
chr4	12016517	12023418	Rbm12b2
chr4	59202422	59235705	Ugcg
chr11	52578208	53000849	Fstl4
chr5	90656191	90795211	Ankrd17
chr1	179921529	180102836	Catspere2
chr7	129432639	129777915	Prkcb
chr9	106724255	106783323	Dcaf1
chr9	61761090	61762317	Rplp1
chr2	26055732	26063769	Lhx3
chr7	87856469	87948217	Iqgap1
chr16	22059082	22163372	Igf2bp2
chr2	119373443	119412758	Chp1
chr18	66216510	66451492	Ccbe1
chr5	66689964	67010056	Apbb2
chr15	76845917	76881098	Mb
chr2	144075859	144096638	Snx5
chr17	90432984	91492142	Nrxn1
chr9	58430047	58500686	Nptn
chr2	93041917	93174644	Tspan18
chr14	79881001	79982298	Elf1
chr5	114292448	114358715	Coro1c
chr18	89461815	89938932	Dok6
chr3	96072577	96073078	H3c13
chr13	101529629	101545854	Cenph
chr18	71413286	72510723	Dcc
chr18	25327521	25625822	AW554918
chr8	90185709	90483494	Zfp423
chr7	52380933	52384115	Rpl13a
chr4	108237472	108251941	Prpf38a
chr14	65430437	65568694	Hmbox1
chr7	133690425	133709880	Eif3c
chr13	120217407	120249130	Paip1
chr2	71624996	71696484	Itga6
chr11	22872005	22876496	Zrsr1
chr10	39341217	39451813	E130307A14Rik
chr17	32440617	32458183	Akap8
chr9	88490163	88494081	9430037G07Rik
chr1	55462790	55811129	Plcl1
chr6	76831631	77929661	Ctnna2
chr13	55794485	55804861	B230219D22Rik
chr9	114310196	114383497	Glb1
chr1	166367230	166388486	Atp1b1
chr4	118949932	118967118	Ybx1
chr13	51796617	51889116	Sema4d
chr19	19005099	19185686	Rorb
chr16	45746344	45844864	Phldb2
chr11	117848171	117885325	Pgs1
chr11	115891630	115922528	Unk
chr5	130505176	130536653	Crcp
chr5	38740512	38893391	Slc2a9
chr5	148672204	148687360	Pomp
chr4	107474864	107549445	Lrp8
chr14	66149283	66211949	Elp3
chr13	23635921	23636823	H3c7
chr7	98239296	99597756	Dlg2
chr6	53237297	53650357	Creb5
chr4	128867147	128896484	Yars
chr2	140221166	142215786	Macrod2
chr16	92392196	92466414	Rcan1
chr16	33684552	33768281	Heg1
chr3	94301464	94386638	Snx27
chr15	34012474	34073291	Mtdh
chr2	32818821	32818938	Snora65
chr2	24831553	24909592	Pnpla7
chr2	109120895	109181903	Kif18a
chr14	118881914	119105441	Abcc4
chr17	80526811	80584372	Galm
chr1	81073982	81338339	Nyap2
chr16	93683464	93691236	Cbr3
chr12	103366937	103505343	Slc24a4
chr4	141394155	141402274	Ctrc
chr12	99914951	99975615	Ptpn21
chr12	4753022	4776073	Fam228b
chr12	101202709	101300892	Kcnk13
chr17	28535698	28623094	Fkbp5
chr13	41405285	41582729	Nedd9
chr6	95423003	95668840	Suclg2
chr9	83818744	84017847	Bckdhb
chr11	108286580	108721929	Cep112
chr10	7512692	7542361	Ppil4
chr3	96361880	96365780	Txnip
chr19	26843291	26898397	4931403E22Rik
chr18	35097069	35114005	Hspa9
chr6	123123041	123154689	Clec4b2
chrX	83986276	85361287	Il1rapl1
chr12	53198733	53411946	Nubpl
chr6	88207328	88396533	Eefsec
chr15	76554415	76648596	Arhgap39
chr6	119303168	119367546	Adipor2
chr18	43691062	43847427	Jakmip2
chr1	56850825	57037092	Satb2
chr7	17616342	17647776	Hif3a
chr12	52478500	52551089	Scfd1
chr10	77505032	77526367	Dnmt3l
chr11	94269705	94335512	Cacna1g
chr2	28811001	28910586	Cfap77
chr5	66407788	66543193	Rbm47
chr8	3353437	3456601	Arhgef18
chr12	21117617	21276032	Asap2
chr7	6173880	6191014	Zscan5b
chr15	72932055	73015377	Ago2
chr14	21871796	22267791	Adk
chr6	102113300	102414661	Cntn3
chr19	46961321	47089679	Nt5c2
chr2	69709252	69723672	Mettl5
chr1	192596758	192735649	Rps6kc1
chr15	5446318	5544983	5430437J10Rik
chr12	3572411	3785484	Dtnb
chr17	29469021	29484877	Mtch1
chr16	36490671	36562220	Casr
chr18	75590871	75857350	Ctif
chr13	22135067	22135527	H2bc11
chr10	19579896	19627480	Pex7
chr7	97599210	97605713	Tmem126a
chr16	39984477	42181792	Lsamp
chr1	153418503	153566477	Fam129a
chrX_random	159645	334187	Tmlhe
chr2	32455229	32476329	St6galnac6
chrX	153985754	154036647	Mbtps2
chr6	142770061	142912972	St8sia1
chr3	51056642	51144566	Elf2
chr5	147042826	147114450	Cdk8
chr14	99498643	99653713	Pibf1
chr5	24777613	25004601	Kmt2c
chr15	47412184	48623535	Csmd3
chr16	44139904	44163575	Naa50
chr9	52906559	53056217	Ddx10
chr9	111020615	111128172	Lrrfip2
chr8	111669141	111773645	4922502B01Rik
chr7	141074883	141416780	Adam12
chr17	57092913	57121549	Acer1
chr4	65041837	66065517	Astn2
chr11	102337230	102417472	Gpatch8
chr5	22251872	22781415	Lhfpl3
chr2	174469035	174536331	Zfp831
chr7	148524901	148548915	Eps8l2
chr19	38129474	38148915	Cep55
chr15	80541743	80771516	Tnrc6b
chr1	84717764	84835879	Trip12
chr2	115407452	115604504	BC052040
chr1	72205807	72258888	Mreg
chr6	87680863	87705905	Efcc1
chr15	79908211	79913836	Rpl3
chr14	102129145	102333910	Lmo7
chr13	103522569	104124572	Mast4
chr1	72871054	72899045	Igfbp2
chr11	106258934	106349110	Ern1
chr10	26701092	27336748	Lama2
chr6	120723786	120744000	Slc25a18
chr4	75587143	77857646	Ptprd
chr8	120807511	121848827	Cdh13
chr16	30312510	30388616	Atp13a3
chr11	100720665	100746483	Stat5a
chr12	3806980	3914443	Dnmt3a
chr2	128926732	128952331	Polr1b

## Sheet: C2C12 LACE-seq gene
Supplementary Table S2. LACE-seq profiling of YTHDC1 binding in ASC and C2C12 myoblasts.
YTHDC1 binding genes in C2C12.
Chromosome	Begin	End	Name
chr7	53698529	53895177	Sergef
chr1	155302888	155334790	Dhx9
chr4	155078924	155107982	Ssu72
chr13	23838603	23839092	H2bc3
chr9	54798666	54805837	Psma4
chr2	112219368	112254394	Katnbl1
chr8	108351644	108368576	Tsnaxip1
chr5	123794457	123824092	Bcl7a
chr14	67604077	67627714	Bnip3l
chr4	138748814	138847735	Capzb
chr15	10376518	10400271	Dnajc21
chr2	131036096	131039250	Ap5s1
chr5	147828231	147888148	Lnx2
chr11	6315870	6319820	Ppia
chr18	56722223	56747366	Phax
chr7	148633550	148637258	Rplp2
chr18	35713064	35717970	Snhg4
chr2	37425388	37517862	Strbp
chr10	21786115	21787885	4930444G20Rik
chr2	35606760	35835340	Ttll11
chr8	74215618	74225699	B3gnt3
chrX	50341255	50374837	Hprt
chr19	4214238	4233634	Gm45928
chr6	132064239	132314153	Gm4736
chr14	76247730	76247841	Snora31
chr3	87710243	87720054	Hdgf
chr3	96531534	96595078	Rnf115
chr14	49288963	49413023	Otx2os1
chr10	58684670	58689181	Sowahc
chr3	105507517	105523760	Inka2
chr2	30141936	30199786	Nup188
chr7	150813975	150856519	E230032D23Rik
chr10	115738430	115826594	Ptprb
chr7	52439046	52460262	Ccdc155
chr5	24368553	24606460	Prkag2
chr11	102889857	102930222	Nmt1
chr11	100957636	100981155	Retreg3
chr5	3343893	3531005	Cdk6
chr15	75831522	75844766	Fam83h
chr6	120413215	120433745	Il17ra
chr10	21601990	21719708	Sgk1
chr6	120745262	120772716	Atp6v1e1
chr19	46471386	46563294	Sufu
chr10	27794626	28317203	Ptprk
chr2	26865446	26876609	Cacfd1
chr10	34023415	34138357	Nt5dc1
chr7	130114078	130146086	Rbbp6
chr19	46227048	46361000	Gbf1
chr14	20570479	20631009	Nid2
chr18	37828581	38001524	Pcdhga2
chr2	24646289	24775129	Ehmt1
chr2	69735303	69862067	Ubr3
chr8	126069476	126069596	Gm23284
chr11	100444150	100481482	Dnajc7
chr8	86247150	86265210	Adgre5
chr10	87609737	87641140	Nup37
chr10	80318020	80331453	Sppl2b
chr11	95685814	95693454	Phospho1
chr7	107694293	107756815	Mrpl48
chr16	55966388	55971550	Rpl24
chr16	38362276	38378302	Popdc2
chr19	5795690	5802672	Malat1
chrX	20447292	20451863	Timp1
chr8	28087808	28091934	Zfp703
chr3	159502614	159599783	Wls
chr9	5345476	5373034	Casp12
chr7	140178694	140315166	Ctbp2
chr7	125628626	125635489	Itpripl2
chr9	96386410	96425683	Gm28729
chr1	94766706	94799483	Ankmy1
chr17	34053121	34056270	Zbtb22
chr17	56551849	56615903	Ptprs
chr7	126115554	126138725	Gprc5b
chr2	25077678	25080222	Tubb4b
chr10	92916141	92947641	Lta4h
chr8	113362435	113362498	Snord111
chr10	77734308	77814445	Agpat3
chr17	23960258	23960336	Mir5125
chr11	105153960	105212459	Mrc2
chr10	24589792	24633335	Med23
chr4	151671323	151681235	Icmt
chr1	154363893	154613435	Rgl1
chr9	62689284	62709831	Gm10653
chr6	85537525	85652745	Alms1
chr1	120355246	120355842	2900060B14Rik
chr11	51912326	51936251	Ppp2ca
chr11	113545748	113555961	D11Wsu47e
chr11	101303559	101306910	Rpl27
chr8	77972593	78508406	Iqcm
chr16	11178269	11192385	4930509G22Rik
chr8	86095597	86118390	Tecr
chr14	51427122	51427446	Rpph1
chr2	103603102	103637797	Caprin1
chr1	134882682	134927164	Mdm4
chr11	69486612	69495586	Senp3
chr4	132809005	132819002	Sytl1
chr5	125757457	125821464	Scarb1
chr7	13620469	13623624	Ube2m
chr3	82931449	83161131	Dchs2
chr1	182257100	182260680	Gm5069
chr6	144942355	145024677	Bcat1
chr9	14584064	14589017	Ankrd49
chr11	33052498	33063206	Npm1
chr10	122115818	122382849	Ppm1h
chr12	84973193	85024077	Rbm25
chr3	121948475	121970133	Gclm
chr5	129526031	129530196	Ran
chr9	102488908	102528454	Cep63
chr1	172949057	172959892	Fcgr4
chr5	148768896	149127641	Mtus2
chr4	125167940	125391417	Grik3
chr2	23062996	23122649	Fem1al
chr15	85690137	85707003	Gtse1
chr11	80173994	80191517	5730455P16Rik
chr4	118727395	118741716	Gm12866
chr9	41990321	42017314	4930546K05Rik
chr19	27836211	28085656	Rfx3
chr4	118995498	119088126	Ccdc30
chr1	169238801	169264109	Tmco1
chr3	37613112	37623282	Gm5148
chr4	12067264	12073892	Rbm12b1
chr11	77499641	77531468	Nufip2
chr13	14046941	14091370	B3galnt2
chr6	135663239	136123563	Grin2b
chr11	116106480	116135531	Srp68
chr17	66132695	66191266	Ppp4r1
chr5	64484178	64519590	Pgm2
chr9	65738130	65751358	Pclaf
chr7	17491839	17496254	Ptgir
chr9	106270963	106278054	Dusp7
chr1	39605592	39605685	Snord89
chr19	7012547	7016940	Gpr137
chr3	32428404	32478147	Mfn1
chr17	46153943	46169326	Vegfa
chr4	9376232	9596491	Asph
chr15	77824053	77949710	Cacng2
chr12	114378447	114383717	Crip2
chr17	29169605	29180317	Srsf3
chr5	130357032	130363340	Chchd2
chr6	72364302	72381100	Ggcx
chr12	58331412	58558228	Mipol1
chr2	68699498	68952340	Cers6
chr2	144993511	145467901	Slc24a3
chr19	3323301	3385733	Cpt1a
chr2	90744897	90750718	Kbtbd4
chr6	97160786	97183309	Arl6ip5
chr1	173258939	173272483	Dedd
chr1	184187922	184196163	LOC105244034
chr2	163231558	163245206	Oser1
chr7	48734244	48755260	AW146154
chr3	85121441	85135949	1700036G14Rik
chr11	118193674	118203848	Cep295nl
chr4	155186598	155198652	Ccnl2
chr10	111578806	111597383	Glipr1l3
chr3	108394196	108448637	Wdr47
chr5	121580542	121641406	Ptpn11
chr11	69794670	69804102	Ctdnep1
chr6	37281021	37392148	Creb3l2
chr5	136724005	137043360	Cux1
chrX	102315717	102319300	Magee1
chr12	117285935	117301675	Zfp386
chr15	3932035	3945746	AW549877
chr19	4148654	4154035	Coro1b
chr5	139451968	139470898	Pdgfa
chrX	20235428	20260305	Uba1
chr5	31501354	31504676	Zfp513
chr18	37119930	37347317	Pcdha5
chr3	100366127	100489396	Man1a2
chr2	156923270	156960832	Samhd1
chr13	109444371	110746177	Pde4d
chr1	186551024	186556372	Hlx
chr2	121781737	121841062	Ctdspl2
chr7	19679893	19683694	Six5
chr12	93044483	93087597	Sel1l
chr4	150377764	150418774	Per3
chr6	30697554	30846794	Copg2
chr7	80571538	80686632	Chd2
chr18	35931213	35966826	Ube2d2a
chr13	104381475	104497713	Gm30551
chr17	24833179	24837474	Noxo1
chr19	5758427	5771419	Scyl1
chr10	21878415	22093945	Raet1a
chr15	79504680	79518302	Josd1
chr15	74938591	74942401	Ly6c2
chr15	18007892	18299382	4921515E04Rik
chr16	65815434	65866613	Vgll3
chr1	122499064	122504568	En1
chr7	151361365	151610399	Shank2
chr7	52381717	52381805	Snord35a
chr5	64300137	64360136	Rell1
chr2	115687000	115893180	Meis2
chr7	132784468	132851202	Gtf3c1
chrX	163909238	165015166	Frmpd4
chr3	120994658	121066012	Alg14
chr13	55445194	55464144	Lman2
chr7	79054581	79084077	4930441H08Rik
chr3	41359656	41420786	Jade1
chr9	71692059	71959626	Tcf12
chr10	120700876	120788700	Tbc1d30
chr7	20216929	20250379	Clptm1
chr11	94152387	94183277	Luc7l3
chr8	109572609	109580637	Cog8
chrX	101678142	101707566	Uprt
chr18	32823296	32996941	4930455D15Rik
chr13	23713646	23714427	H1f4
chr16	18876843	18970401	Hira
chr2	180701930	180717229	Arfgap1
chr14	77436579	77512070	Ccdc122
chr10	79372798	79379675	R3hdm4
chr11	29445842	29448040	Rps27a
chr7	49371841	49451146	Vmn2r60
chr5	100462598	100468241	Hnrnpdl
chr10	127947306	127962915	Esyt1
chrX	100626856	100680296	Tsix
chr12	76731912	76732736	Rplp2-ps1
chr7	106628073	106628217	Snord15b
chr4	134117605	134260205	Man1c1
chr13	9275771	9668172	Dip2c
chr3	19895945	19935310	Hps3
chr6	28430348	28838832	Snd1
chr2	25911056	25978331	Nacc2
chr10	118635868	118677111	Cand1
chr15	81534678	81560349	Rangap1
chr3	153570253	153575930	Rabggtb
chr11	72254829	72265272	Mybbp1a
chr4	125909411	125933563	Map7d1
chr5	100871056	100929658	Lin54
chr7	37483137	37558572	Tshz3
chr2	132075022	132078916	Pcna
chrX	165233031	165742372	Arhgap6
chr6	136645805	136730263	Gucy2c
chr2	5819106	5863838	Dhtkd1
chr18	31919478	31943737	Ammecr1l
chr4	117567098	117587604	Ipo13
chr3	89195786	89202701	Gm15417
chrX	156560151	156576362	Pdha1
chr11	120241112	120299014	Nploc4
chr5	23344762	23349963	Tomm7
chr3	88140182	88166259	Smg5
chr4	149353583	149383132	H6pd
chr2	156213799	156218715	2900097C17Rik
chr7	48923384	48982563	Vmn2r-ps54
chr19	26679650	26852811	Smarca2
chr17	21082418	21102869	Ppp2r1a
chr2	29887078	29904399	Wdr34
chr2	102140276	102241057	Trim44
chr1	138521478	138526968	Zfp281
chr14	57505440	57581195	Zmym2
chr15	90763706	90880382	Kif21a
chr7	134119428	134124015	Cdipt
chr8	73051642	73059227	Fkbp8
chr1	78654400	78704318	Acsl3
chrX	50406432	50406530	Mir351
chr10	40069114	40203624	Cdk19
chr14	93412919	94289898	Pcdh9
chr19	4040288	4042221	Gstp2
chr4	120818488	120887689	Rlf
chr1	137662662	137665711	Phlda3
chr6	120881564	121081040	Mical3
chr16	21892042	21931950	Map3k13
chr13	25084164	25112186	Mrs2
chr17	57160472	57170930	Khsrp
chr11	62094975	62129943	Ttc19
chr2	155207592	155215583	Trp53inp2
chr10	128184935	128203624	Pym1
chr1	39592546	39603722	Cnot11
chr15	57972921	57990209	Wdyhv1
chr8	114060540	114149619	Znrf1
chr19	5079337	5085477	Tmem151a
chr2	122174628	122194883	Shf
chr7	148661135	148679326	Tspan4
chr17	26063365	26078934	Pigq
chr14	27393344	27453808	Dennd6a
chr18	35721812	35751699	Matr3
chr4	88425754	88426564	Gm13272
chr18	52675714	52689521	Lox
chr5	24728690	24771736	Galnt11
chr15	35861731	35868001	Cox6c
chr13	107749076	107812435	Kif2a
chr5	73684033	73705316	Ociad1
chr5	140895259	140919312	Eif3b
chr8	67071351	67171906	Cpe
chr1	72904639	72921439	Igfbp5
chr19	46451303	46470231	Actr1a
chr18	32687974	32719688	Gypc
chr4	114672723	114715803	Stil
chr9	103255432	103268110	Cdv3
chr5	92391908	92401163	Thap6
chr12	111685434	111821284	Ppp2r5c
chr2	180962320	180976732	Helz2
chr3	157730150	158224725	Lrrc7
chr9	108594474	108652775	Prkar2a
chr3	123229084	123393770	Ndst3
chr6	51410434	51419893	Hnrnpa2b1
chr15	101933365	101946832	Tns2
chr8	74743644	74748933	Fam32a
chr5	12383166	12588943	Sema3d
chr17	7099578	7099686	Mir692-1
chr3	89518944	89557377	Adar
chr6	48080905	48345407	Gm16630
chr17	56240011	56249205	Plin4
chr1	95517328	95532304	Stk25
chr11	3024030	3031945	Pisd-ps3
chr1	74482084	74590860	Usp37
chr5	117769275	117805015	Vsig10
chr19	45824745	45858043	Oga
chr11	53914426	53945169	P4ha2
chr16	16753109	16829456	Spag6l
chr2	152452744	152460927	Rem1
chr19	10055090	10059601	Fth1
chr15	10498733	10644386	Rai14
chr3	37211476	37220373	Bbs12
chr13	54780760	54795321	Rnf44
chr15	39702136	39775540	Lrp12
chr8	36650843	36742503	Mfhas1
chr7	20150298	20158692	Gemin7
chr7	135390326	135399213	Tgfb1i1
chr19	28333341	28754567	Glis3
chr7	31353874	31373745	Kmt2b
chr16	16819806	16820289	Rpl31-ps12
chr13	58227240	58229917	Hnrnpa0
chr5	123237470	123271351	Anapc5
chr4	86221577	86223187	Rraga
chr9	69860355	69870673	Gtf2a2
chr5	34712582	34829107	Fam193a
chr7	97278723	97357957	Picalm
chr5	38430469	38529008	Stx18
chr11	52174353	52202899	Vdac1
chr17	46520715	46557867	Zfp318
chr10	128237092	128241503	Tmem198b
chr3	157609964	157670998	Ankrd13c
chr1	55134677	55145087	Hspd1
chr17	17371867	17403311	LOC102640673
chr2	77018397	77118649	Sestd1
chr2	158201449	158212210	Snhg11
chr17	36278693	36282894	Gm10499
chr14	22569753	22617948	Samd8
chr18	37602171	37605863	Pcdhb13
chr13	91074954	91363592	Atg10
chr9	100543867	100858963	Stag1
chr13	21902336	21902787	Hist1h2ap
chr19	57527396	57565495	Trub1
chr5	13396784	13603485	Sema3a
chr2	59450099	59684270	Tanc1
chr13	62873560	62887168	Gm5141
chr4	148550428	148681842	Kif1b
chr9	13553623	13613340	Mtmr2
chr1	15795727	15834133	Terf1
chr17	3326573	3519397	Tiam2
chr14	120877683	120906414	Rap2a
chr1	135516439	135557976	Zc3h11a
chr14	48092236	48151637	Fbxo34
chr10	117125931	117147814	Mdm2
chr18	32227388	32263985	Iws1
chr19	12841429	12870613	Zfp91
chr12	113066669	113146266	Ppp1r13b
chr5	113339498	113444558	Grk3
chr17	6106830	6240637	Tulp4
chr13	51503987	51518166	S1pr3
chr17	8565261	8615591	T2
chr2	176404642	176421028	Gm14434
chr13	16103684	16123442	Inhba
chr5	134965253	135028304	Clip2
chr11	102150614	102157943	Atxn7l3
chr9	56842775	56910614	Ptpn9
chr8	128663025	128919857	Slc35f3
chr1	13129186	13364164	Ncoa2
chr13	14090218	14131905	Tbce
chr15	56497182	56526101	Has2
chr1	10028299	10126849	Cspp1
chr11	116295408	116300391	Ubald2
chr6	59158864	59162027	Tigd2
chr15	77745481	77759424	Txn2
chr1	156943497	156946766	Ier5
chr1	90155431	90174154	Hjurp
chr11	3539788	3548817	Tug1
chr14	31292751	31340242	Dcp1a
chr3	96024995	96027661	H2bc21
chr4	154865470	154933378	Gnb1
chr7	133995947	134005886	Ino80e
chr9	98464150	98488794	Copb2
chr2	163161978	163223729	Jph2
chr10	128350646	128356353	Rdh5
chr4	62160088	62163234	Hdhd3
chr17	34046390	34052535	Daxx
chr9	120842518	120869625	Ctnnb1
chr11	69664065	69672232	Tnk1
chr13	16949310	17786599	Sugct
chr7	52118437	52125038	Ptov1
chr11	70833113	70840862	Mis12
chr11	54251681	54331743	Fnip1
chr6	86474474	86476183	Pcbp1
chr18	5046587	5119291	Svil
chr4	102786995	102838359	Mier1
chr5	151402507	151468187	N4bp2l2
chr12	70290074	70299416	Dnaaf2
chr8	26265024	26312014	Tacc1
chr11	99246569	99250678	Krt10
chr7	116422730	116582567	Stk33
chr11	69547501	69572135	Polr2a
chr2	157854233	157903943	Rprd1b
chr2	162769201	162802863	L3mbtl1
chr1	89373404	89470445	Ngef
chr1	148342759	148749601	Brinp3
chr3	144233391	144260640	Selenof
chr5	104937369	104983226	Thoc2l
chr1	108616987	108656319	Kdsr
chr8	108384433	108404301	Nutf2
chr12	34732447	35601767	Hdac9
chr4	88403748	88404296	Gm13286
chr18	60753644	60783959	Synpo
chr8	73221638	73224515	Jund
chr12	106168143	106248019	Syne3
chr4	108132031	108232020	Tut4
chr2	120435118	120447295	Haus2
chr14	52780094	52816914	Supt16
chr9	98196989	98320952	Nmnat3
chr8	11312805	11449287	Col4a2
chr8	35652474	35703370	B930018H19Rik
chr10	81069053	81072581	BC025920
chr3	87329500	87344080	Etv3
chr7	132695785	132722988	Il4ra
chr11	86940577	87064362	Trim37
chr7	26006444	26012514	Zfp526
chr19	7430954	7457516	Spindoc
chr19	23215716	23242618	Klf9
chr11	32542555	32646814	Fbxw11
chr8	28196313	28233908	Adgra2
chr8	32222299	32243790	Rnf122
chr19	4099998	4113965	Pitpnm1
chr15	85166685	85294267	Atxn10
chr17	12934177	13052750	Airn
chr9	89949105	89970933	Ctsh
chr14	60178225	60216796	Cdadc1
chr8	87493521	87498709	Prdx2
chr8	41947721	42007424	Slc7a2
chr5	48374394	48698974	Slit2
chr6	34821771	34828065	Cyren
chr13	105421220	105607033	Cwc27
chr17	15178515	15201196	Ermard
chr2	31101443	31150991	Ncs1
chr7	103319754	104059602	Tenm4
chr14	73637698	73640165	Lpar6
chr3	95462643	95467101	Mcl1
chr7	54178586	54213888	Uevld
chr5	136165015	136211196	Por
chr11	59661575	59690035	Nt5m
chr8	98157459	98168959	Gins3
chr19	3851773	3894369	Chka
chr1	120285635	120506039	Clasp1
chr11	121098550	121117170	Narf
chr4	86090602	86204207	Saxo1
chr9	120873572	121186290	Ulk4
chr7	133903140	133909330	Mapk3
chr19	6046576	6053718	Syvn1
chr10	86153586	86168189	Hsp90b1
chr11	106641669	106650499	Ddx5
chr14	27457620	27476328	Arf4
chr5	116009476	116013738	Rplp0
chr2	84170783	84265423	Calcrl
chr2	118687730	118708645	Ivd
chrX	34622513	34625217	Rpl39
chr18	37649119	37654157	Pcdhb18
chr5	23957995	24007865	Agap3
chr7	133245233	133344015	Xpo6
chr16	46153106	46155190	Gm4737
chr7	13911016	13946017	Pla2g4c
chr2	13495938	13504453	Vim
chr7	25247502	25260987	Plaur
chr4	83171449	83512047	Ccdc171
chr12	87397693	87419991	Tgfb3
chr17	35087181	35089416	1110038B12Rik
chr19	21852830	21932850	Cemip2
chr9	44187573	44200452	Hyou1
chr15	98350148	98350265	Snora34
chr14	61253542	61383393	Spata13
chr3	96149210	96162402	Platr30
chrUn_random	553955	588617	Gm7819
chr1	173300304	173318418	Nectin4
chr2	112471539	113057240	Ryr3
chr16	35397398	35490959	Pdia5
chr11	61022244	61031918	Aldh3a1
chr5	142877451	142937969	Foxk1
chrX	120217132	120259263	Cldn34c1
chr19	16030263	16059479	Cep78
chr4	116828376	116828453	Snord55
chr19	16510157	16685308	Gna14
chr2	150658251	150730467	Abhd12
chr5	14933652	15220093	Gm21149
chr18	33955981	34166860	Epb41l4a
chr2	125453183	125549884	Shc4
chr17	12612840	12700570	Slc22a3
chr5	3803165	3844515	Krit1
chr12	104672399	104678455	Ifi27
chr11	20991327	21050330	Peli1
chr10	127896371	127927645	Smarcc2
chr6	116288040	116359561	Marchf8
chr1	132473283	132526183	Zp3r
chr11	5420644	5425996	Xbp1
chr14	48268986	48356239	Ktn1
chr16	62854133	62929168	Pros1
chr7	28258859	28262383	Sertad3
chr7	57230720	58118659	Nell1
chr17	56326105	56358312	Dpp9
chr9	7818226	7837057	Birc2
chr1	88051355	88174859	Armc9
chr19	54018796	54107768	Shoc2
chr18	38578561	38624851	Ndfip1
chr15	75771382	75779830	Zfp623
chr3	87421481	87541961	Arhgef11
chr3	32233716	32264587	Zmat3
chr12	117724193	118516640	Ptprn2
chr16	52249109	52453194	Alcam
chr12	103157111	103196453	Atxn3
chr4	88419738	88420705	Gm13290
chr2	26492696	26495764	Snhg7
chr3	104747723	104764627	Wnt2b
chr8	46593142	46913260	Sorbs2
chr1	171902438	172019075	Ddr2
chr1	34735027	34869583	Arhgef4
chr8	126545397	126572405	Urb2
chr5	26584302	26588728	Gm7361
chr2	152052576	152107587	Csnk2a1
chr7	86278654	86293946	Mfge8
chr17	79348745	79420156	Prkd3
chrX	98624990	98643932	Nono
chr10	126733277	126748842	Mars1
chr2	173404821	173485040	Ppp4r1l-ps
chr2	165113531	165151979	Elmo2
chr8	90723112	90783621	Tent4b
chr2	180444931	180456304	Gid8
chr1	135552456	135557462	Zbed6
chrX	50972343	50973614	Rtl8b
chr9	115151588	115219586	Stt3b
chr4	106334413	106351549	Ttc4
chr5	77269624	77302579	C530008M17Rik
chr10	22822768	23069749	Eya4
chr5	31171952	31179842	Tmem214
chr1	135599251	135650324	Atp2b4
chr1	13775766	13777010	Gm5523
chr15	99421459	99425260	Aqp5
chr15	99532718	99544426	Smarcd1
chr17	24806632	24818968	Zfp598
chr11	75275041	75280192	Mir22hg
chr4	116230263	116266507	Gpbp1l1
chr13	67717938	67738718	Zfp729a
chr11	49016794	49032318	Zfp62
chr17	5941280	6040191	Synj2
chr18	35278566	35414429	Ctnna1
chr3	104667424	104732981	St7l
chr1	154613672	154622710	Arpc5
chrX	71516155	71518474	Rpl10
chr15	78858642	78860930	H1f0
chr9	20232762	20264604	Zfp26
chr2	35111879	35163422	Gsn
chr11	113106169	113511406	Slc39a11
chr8	108674254	108688618	Pla2g15
chr19	6276896	6300096	Ehd1
chr5	103337568	103640353	Mapk10
chr17	47642000	47736637	Ccnd3
chr5	89956454	90012765	Npffr2
chr4	34750359	34830197	Zfp292
chr1	132950278	132994420	Mapkapk2
chr15	38417185	38449021	Azin1
chr9	118415436	118491637	Golga4
chr4	147413186	147433671	Mthfr
chr16	23110843	23111006	Snora81
chr3	95119112	95127521	Cers2
chr16	8830193	8859017	1810013L24Rik
chr9	106786316	106789331	Rbm15b
chr10	59740376	59765348	Psap
chr7	63495129	63791888	Oca2
chr11	98543868	98557292	Psmd3
chr8	87550732	87554190	Trir
chr12	78339091	78576983	Fut8
chr10	66998247	67004936	Egr2
chr1	127289482	127332304	Actr3
chr8	86732714	86732820	Mir24-2
chrX	72418056	72625380	F8
chr8	111599122	111777539	D030068K23Rik
chr4	155603153	155608966	Klhl17
chr6	55153377	55270216	Mindy4
chr5	137819865	137918292	Zan
chr15	103103319	103130295	Copz1
chr3	30691798	30720185	Sec62
chr16	14361651	14474971	Abcc1
chr13	14722512	14730469	AW209491
chr19	11011650	11017001	Ptgdr2
chr7	117161829	117200121	Ipo7
chr1	158260546	158351046	Axdnd1
chr15	4325491	4525579	Plcxd3
chr7	52496123	52528735	Slc6a16
chr7	91394785	91558548	Arnt2
chrX	71638630	71699117	Ikbkg
chr7	23498617	23685774	Gm6902
chr5	115119511	115140944	Gltp
chr5	116081996	116097167	Rab35
chr3	101959823	102008616	Vangl1
chr7	52973441	52976205	Rpl18
chr3	144781553	144816879	Odf2l
chr13	23368073	23405276	4930557F10Rik
chr13	21845945	21846422	H2bc15
chr5	138526312	138549050	Zkscan1
chr9	81757277	82099614	Mei4
chr9	45773394	45820773	Pafah1b2
chr6	124692562	124706505	Atn1
chr13	55701257	55711804	B4galt7
chr1	190086717	190788918	Ush2a
chr11	116033197	116060359	Acox1
chr13	55501009	55516056	Slc34a1
chr5	14910124	14914889	Gm9758
chr17	17201067	17226595	Zfp960
chr11	61770265	62036515	Specc1
chr14	76814768	76907572	Tsc22d1
chr11	59475997	59594362	Mprip
chr14	67632893	67691308	Ppp2r2a
chr11	43495500	43536135	Pwwp2a
chr7	74376049	74517744	Mef2a
chr12	70298198	70300855	9330151L19Rik
chr11	97897938	97914776	Stac2
chr5	122775517	122804204	Rad9b
chr11	74989445	74992310	Ovca2
chrX	158849884	159081590	Reps2
chr9	38935752	38952655	Olfr27
chr7	123266999	123451890	Plekha7
chr2	66022384	66094674	Ttc21b
chr8	23587172	23680088	Slc20a2
chr12	114198073	114238832	Brf1
chr19	59978787	60019557	Rab11fip2
chr19	41347242	41459592	Pik3ap1
chr14	27511040	27704891	Dnah12
chr19	20447924	20465161	Anxa1
chr18	34380638	34481844	Apc
chr11	3795243	3801299	Dusp18
chr11	68886928	68887064	Snord118
chr15	69754663	69908634	Gm19782
chr6	67216973	67239296	Serbp1
chrX	166412975	166416849	G530011O06Rik
chr15	75799553	75806298	Zfp707
chr8	74659187	74677041	Tpm4
chr8	24283418	24318925	Gpat4
chr19	5917556	5924816	Cdc42ep2
chr1	52512693	52557292	Nab1
chrX	9735342	9793921	Rpgr
chrX	159294775	159326394	Syap1
chr14	26707420	26722457	Plac9b
chr2	84574361	84578034	Ypel4
chr18	47404908	47528524	Sema6a
chr14	122883587	123289166	Pcca
chr1	89841696	89905126	Usp40
chr5	65194762	65221368	Klf3
chr15	25552305	25743426	Myo10
chr3	87734236	87744608	Isg20l2
chr3	91818505	91835506	Pglyrp3
chr13	55694496	55699055	Tmed9
chr19	5068078	5070639	Cd248
chr17	26698457	26793878	Ergic1
chr17	27693598	27700616	Hmga1b
chr7	52377758	52379759	Rps11
chr5	100849861	100858554	5430416N02Rik
chr16	38089087	38246170	Gsk3b
chr1	16056060	16083406	4930444P10Rik
chr15	72636032	72640754	Peg13
chr1	12682511	12850453	Sulf1
chr9	58064987	58097593	Pml
chr16	4765461	4790292	Cdip1
chr6	32094559	32538192	Plxna4
chr5	21049345	21081720	Lrrc17
chr15	76210943	76283469	Mroh1
chr2	181099636	181115498	Zgpat
chr9	7932001	8004596	Yap1
chr3	123210855	123210984	Snora24
chr11	26371402	26493920	Vrk2
chr2	73267667	73367544	Wipf1
chr10	82448242	82658636	Chst11
chr14	32454243	32481383	Btd
chr2	175917415	175930232	Zfp967
chr14	56254803	56262643	Tm9sf1
chr2	6243803	6364866	Usp6nl
chr10	79843100	79850396	Mex3d
chr13	101421298	101426015	Taf9
chr2	28496753	28546692	Tsc1
chr2	177249447	177263899	Zfp970
chr18	37906670	38001524	Pcdhga10
chr5	89316285	89668681	Slc4a4
chr6	31043563	31168474	Lncpint
chr6	30316384	30341020	Zc3hc1
chrX	148237825	148369961	Huwe1
chr2	118579881	118588397	Ccdc9b
chr4	116309115	116324279	Akr1a1
chr2	104670898	104690007	Prrg4
chr10	69559869	69655948	Ccdc6
chr15	87374729	87589794	Tafa5
chr4	43970574	43991990	Glipr2
chr5	134695923	134705495	Ncf1
chr5	135095742	135115279	Eif4h
chr2	6053915	6061616	Gm10857
chr7	109387637	109398632	Rhog
chr1	39424696	39428755	Rpl31
chr7	29573988	29583984	Rinl
chr12	53800370	54252002	Akap6
chr4	21775195	21803622	Pnisr
chr10	34203206	34331036	Frk
chr18	36961417	36961761	Vaultrc5
chr2	152495197	152534404	H13
chr14	25309900	25316182	Rps24
chr7	87331727	87371410	Sema4b
chr7	16523185	16531457	Nop53
chr4	135866857	135901894	Hnrnpr
chr13	9875859	10360049	Chrm3
chr11	69579414	69597528	Zbtb4
chr9	20299513	20325863	Zfp266
chr11	62129928	62252017	Ncor1
chr16	13256574	13417622	Mrtfb
chr3	89673246	89717118	Il6ra
chr11	6446890	6496764	Ccm2
chr1	37496185	37597861	Mgat4a
chr7	29666675	29678604	Capn12
chr19	37095781	37281961	Cpeb3
chr12	82459840	82633898	Gm20498
chr1	17591982	17621020	Pi15
chr14	55512980	55517764	Pabpn1
chr2	146838735	146903733	Xrn2
chr10	126627429	126632784	Dtx3
chr2	30271570	30303327	Ptpa
chr8	13338751	13378448	Tfdp1
chr6	91162758	91222534	Fbln2
chr1	59741850	59768354	Nop58
chr6	136820956	136824344	Mgp
chr14	58196358	58284075	Xpo4
chr14	31832324	31934778	Pbrm1
chr19	5041363	5049912	Brms1
chr8	72430968	72520283	Gatad2a
chr11	59355071	59380455	Nlrp3
chr9	123387819	123430670	Limd1
chr3	7503426	7553848	Zc2hc1a
chr2	119490852	119491888	H3f3c
chrX	23270177	23383127	Wdr44
chr7	131126342	131542503	Hs3st4
chr13	94541634	94712971	Arsb
chr17	47748534	47823688	Gm20517
chr7	107475247	107520406	Ppme1
chr4	40206639	40216874	Topors
chr10	57786295	57887439	Lims1
chr5	30062438	30113018	Dnajb6
chr12	112277577	112354113	Rcor1
chr11	98064619	98114854	Cdk12
chr9	107516456	107537674	Gnai2
chr8	86423997	86465853	Adgrl1
chr8	116963552	117876612	Wwox
chr18	35810001	35814875	Prob1
chr18	37979200	38001526	Pcdhgc5
chr18	67959761	68044824	Cep192
chr17	3064318	3084183	Pisd-ps2
chr17	34088944	34092586	Rps18
chr10	80065625	80070399	Adat3
chr4	106233643	106261718	Dhcr24
chr9	44494391	44543281	Phldb1
chr19	41557172	41670650	Lcor
chr18	78012507	78021607	Atp5a1
chr10	125403275	125452415	Lrig3
chr15	54670456	54751701	Enpp2
chr15	37295930	37722183	Ncald
chr17	7109065	7152705	Rsph3b
chr16	55811490	55838754	Nfkbiz
chr4	57203713	57314709	Ptpn3
chr15	81678700	81688756	Tob2
chr5	122016036	122043833	Aldh2
chr5	33361465	33370615	Ywhah
chr13	23848806	23849255	H4c2
chr10	75931647	75978604	Mcm3ap
chr13	55423416	55426633	Prelid1
chr15	55388963	55457978	Mtbp
chr4	133685773	133743000	Cep85
chr11	4847524	4942797	Ap1b1
chr2	92755258	92796208	Syt13
chr5	145844738	145869625	Arpc1a
chr7	123480790	123586972	Pik3c2a
chr9	58004071	58007028	Islr
chr11	117060975	117223639	Septin9
chr15	84753858	84773393	Nup50
chr4	123465118	123507147	Rhbdl2
chr2	71227317	71279679	Hat1
chr5	144225361	144265310	Daglb
chr10	80364108	80380990	Lmnb2
chr11	95198332	95243186	Fam117a
chr11	104363841	104411934	Cdc27
chr2	91514769	91550749	Atg13
chr6	118377337	118405524	Zfp248
chr15	102845341	102845432	Mir615
chr9	59236361	59334181	Arih1
chr12	8535289	8605872	Slc7a15
chr13	21903615	21904019	Hist1h4m
chr8	118227153	118230794	Maf
chr13	38592140	38620693	Txndc5
chr3	137527451	137529886	H2az1
chr4	48292632	48444825	Invs
chr19	8962877	8963260	5730408K05Rik
chr2	5214503	5635808	Camk1d
chr2	48805028	49172589	Mbd5
chr9	35259661	35315237	Cdon
chr6	124989866	124999283	Ing4
chr18	37157534	37347311	Pcdha9
chr13	18809161	18958680	Vps41
chr7	148634702	148634835	Snora52
chr2	160772714	160934822	Chd6
chr8	124114338	124122660	Map1lc3b
chr1	40281925	40373022	Il1r1
chr11	69156775	69182928	Chd3
chr6	124758679	124760634	Spsb2
chr19	4000580	4002102	Nudt8
chr5	131867470	131890588	Gm29681
chr15	6658381	6750400	Rictor
chr19	8967477	8972380	Ints5
chrX	50626601	50684363	Fam122c
chr12	21329370	21379493	Adam17
chr12	56403624	56483478	Prorp
chr12	30622901	30702523	Pxdn
chr15	102065369	102087953	Rarg
chr13	58492493	58504704	Hnrnpk
chr10	7924551	8238623	Ust
chr12	75998204	76278319	Kcnh5
chr13	96729398	96902532	Sv2c
chr7	4944454	4947703	Zfp579
chr7	73984621	74297511	Adamts17
chr6	37998483	38074586	Atp6v0a4
chr14	12386067	13074553	Ptprg
chr15	12754570	12865046	Drosha
chr7	134985322	134992479	Stx4a
chr7	116177833	116226845	Ric3
chrX	68809092	68813848	Hmgb3
chr2	44839032	44972962	Zeb2
chr11	69375256	69393752	Wrap53
chr15	103269391	103278890	Gtsf2
chr1	74708276	74748406	Ttll4
chr3	75680105	75760871	Golim4
chr2	163899874	163981260	Stk4
chr12	114336489	114375417	Mta1
chr12	120084802	120091051	Sp8
chr2	127073684	127086844	Tmem127
chr5	35292097	35376242	Rgs12
chr13	23444972	23461077	Zfp322a
chr18	37133456	38001526	Gm38667
chr15	85036438	85116724	Fbln1
chr7	125262404	125273139	Arl6ip1
chr5	31458379	31482517	Gtf3c2
chr13	94971265	95055786	Scamp1
chr15	10530048	10541406	Gm10389
chr2	181336024	181390366	Prpf6
chr19	7349886	7416350	Mark2
chr5	129490433	129514447	Stx2
chr15	6529847	6615608	Fyb
chr12	60167906	60175004	Pnn
chr11	105946216	106016748	Map3k3
chr6	115757993	115758121	Snora7a
chr2	144194768	144233411	Kat14
chr11	105040335	105042747	1700052K11Rik
chr6	92320886	92656178	Prickle2
chr2	93259259	93303107	Cd82
chr6	116214237	116280322	Zfand4
chr11	114536782	114582298	Ttyh2
chr6	17643994	17893023	St7
chr5	149683160	149740223	Katnal1
chr4	130305553	130305617	Snord85
chr9	122758028	122775124	Zfp445
chr15	7760048	7787580	Gdnf
chr6	88034467	88055298	Rpn1
chr8	72285223	72298810	Zfp866
chr5	151840090	151992768	Stard13
chr3	95330708	95360327	Ctss
chr2	181572559	181592165	Pcmtd2
chr19	5637541	5648134	Rela
chr10	41258650	41436269	Ccdc162
chr5	32761343	32796085	Ppp1cb
chr12	89603758	89615767	3200001D21Rik
chr12	96930436	97023423	Flrt2
chr2	121973423	121978818	B2m
chr5	115795632	115798967	Cox6a1
chr19	6418756	6533217	Nrxn2
chr5	23358051	23358095	Snord93
chr9	110435101	110521137	Setd2
chr11	71856004	71860872	Pimreg
chr2	32006668	32090057	Prrc2b
chr5	108329547	108338024	Rpl5
chr3	97462135	97476990	Prkab2
chr1	127810213	128727209	Nckap5
chr6	127099407	127162437	9330179D12Rik
chr11	120207001	120209809	Actg1
chr7	56214443	56865458	Nav2
chr5	137458064	137463829	Znhit1
chr15	73553575	73589196	Ptp4a3
chr10	82161859	82205173	Hcfc2
chr17	8503953	8520307	Sft2d1
chr6	128307018	128312929	Rhno1
chr1	92100555	92112297	Ackr3
chr7	139903767	140004879	Fam53b
chr4	88783274	88826994	Mtap
chr16	18498806	18566773	Gnb1l
chr10	79689343	79707889	Pwwp3a
chr2	31829970	31909495	Nup214
chr2	120558552	120676320	Ttbk2
chr1	133534891	133572084	Ctse
chr10	80506816	80523016	Sgta
chr11	70514050	70545472	Kif1c
chr4	138936574	139045447	Ubr4
chr2	156688858	156699298	Rab5if
chr16	55900001	55934961	Cep97
chr10	79519737	79565447	Sbno2
chr4	35653897	36898777	Lingo2
chr2	164717392	164737250	Zfp335
chr15	102493299	102501478	Atp5g2
chr3	32335073	32367408	Pik3ca
chr12	56256091	56290200	Srp54b
chr10	50312475	50571008	Ascc3
chr2	179911078	179960564	Lama5
chr17	57908634	58551054	Cntnap5c
chr8	88016475	88052801	Gpt2
chr19	8800356	8800481	Snord22
chr17	35031504	35033789	Zbtb12
chr19	7500385	7557781	Rtn3
chr10	116342836	116387509	Rab3ip
chr7	5013745	5031547	U2af2
chr11	58791595	58804964	Trim11
chr2	106533338	106708517	Mpped2
chr2	22795594	22895761	Abi1
chr8	59029951	59072736	Fbxo8
chr14	105038361	105366000	D130009I18Rik
chr6	51420615	51433703	Cbx3
chr7	19589407	19592112	Irf2bp1
chr18	65047410	65377480	Nedd4l
chr2	167514415	167515932	Cebpb
chr4	59818522	59917612	Snx30
chr1	189039390	189175308	Gpatch2
chr3	102824469	102862109	Csde1
chr5	124889939	124912320	Kmt5a
chr6	38383925	38462763	Ubn2
chr1	43179916	43253606	Fhl2
chr10	24051494	24315609	Gm15270
chr7	16986545	17023045	Zc3h4
chr1	72757834	72760387	Rpl37a
chr10	11001128	11017767	Fbxo30
chr4	108673260	108734381	Nrd1
chr19	4756525	4765940	Rbm4b
chr3	130429745	130433316	Rpl34
chr14	26707889	26722379	Plac9a
chr5	131913203	133019090	Auts2
chr7	13609501	13616381	Trim28
chrX	154136905	154190523	Smpx
chr8	96996663	97051172	Nlrc5
chrX	9462747	9575990	Sytl5
chr3	144955436	145214975	Col24a1
chr2	155643468	155644939	BC029722
chr2	32143846	32163433	Golga2
chr12	62624154	62958916	Lrfn5
chr2	26244868	26252641	Pmpca
chr19	8797977	8800816	Snhg1
chr4	124419094	124478755	Inpp5b
chr1	58768335	58815726	Cflar
chr10	61956581	61990193	Srgn
chrX	67596245	67618260	Ids
chr2	158593835	158612373	Fam83d
chr19	30638977	31839523	Prkg1
chr2	25430936	25435619	Ajm1
chr6	47827554	47858483	Zfp282
chr2	112333121	112471410	Aven
chr1	158358239	158404459	Soat1
chr19	46673596	46731879	Wbp1l
chr15	102236747	102266835	Sp1
chr11	117670981	117675600	Syngr2
chr15	85411572	85424138	AU022754
chr10	85401382	85420538	Rtcb
chr17	36245975	36248621	H2-T-ps
chr17	75404869	75791852	Ltbp1
chr8	86132074	86136552	Dnajb1
chr3	126066770	126143292	Arsj
chr10	82113178	82153395	Glt8d2
chr3	88101057	88125688	Cct3
chr11	50013654	50024322	Sqstm1
chr19	4510472	4621752	Pcx
chr5	98313707	98460036	Antxr2
chr8	107872158	107893781	Slc9a5
chr4	136436041	136442115	C1qb
chr10	79256317	79283641	Palm
chr17	28938071	28975734	Brpf3
chr2	154839306	154876748	a
chr5	93032077	93035605	Stbd1
chr9	72305862	72339766	Tex9
chr10	82296696	82360469	Txnrd1
chr7	24170908	24226942	Nlrp5
chr10	127814180	127831062	Ankrd52
chr2	151931260	151937112	Srxn1
chr13	74615828	74631409	Zfp825
chr8	124474392	124553160	Banp
chr1	9708703	9738463	Vcpip1
chr4	138908502	138934650	Emc1
chr2	122506969	122528399	Slc30a4
chr14	26278671	26486229	Zmiz1
chr19	46576138	46590945	Trim8
chr3	152009442	152056578	Usp33
chr9	116481864	117539031	Rbms3
chr5	8072347	8368160	Adam22
chr1	130484776	130488876	Cxcr4
chr12	104187069	104422207	Unc79
chr17	73267645	73291286	Lbh
chr1	62749891	62865266	Nrp2
chr5	58109320	58524474	Pcdh7
chr14	122310656	122315110	Gpr18
chr15	98369121	98398167	Ccnt1
chr4	134453764	134470831	Tmem50a
chr10	10325743	10336111	Gm5177
chr9	117949640	117978912	Azi2
chr17	83901257	83913673	Cox7a2l
chr11	77996561	77996615	Snord42b
chr18	39570199	39679075	Nr3c1
chr13	48974586	49063429	Fam120a
chr12	71065999	71087989	Sav1
chr10	80046394	80053086	Abhd17a
chr11	106849943	106860839	Kpna2
chr3	96042402	96043065	H3c14
chr4	4689631	4720453	Impad1
chr10	76058501	76086149	Col6a2
chr10	61300982	61441856	Col13a1
chr2	25127986	25141436	Anapc2
chr16	5050150	5086382	Ubn1
chr6	125111870	125116485	Gapdh
chr9	110207696	110224606	Elp6
chr14	71289914	71379647	Gfra2
chr13	55311143	55419686	Nsd1
chr11	59784116	59859991	Pemt
chr2	131003025	131005803	Cenpb
chrX	136219535	136288757	Tbc1d8b
chr3	142453866	142544968	Pkn2
chr2	35904993	35935229	Morn5
chr5	103854211	104027380	Ptpn13
chr3	65332369	65359440	Tiparp
chr9	111463941	111592852	Stac
chr17	24360177	24388354	Ccnf
chr13	23643155	23643537	H4c6
chr2	169934143	169968175	Zfp217
chr9	78296017	78321959	Mto1
chr17	42693732	42748262	Opn5
chr10	74980787	74998185	Snrpd3
chr1	163018509	163061610	Klhl20
chr15	103174718	103197222	Itga5
chr7	96656293	96675697	Prss23
chr11	78075256	78104127	2610507B11Rik
chr18	6024448	6136096	Arhgap12
chr10	75495357	75505714	Zfp280b
chr2	144381965	144416489	Sec23b
chr7	4877423	4896430	Ssc5d
chr5	42178779	42235554	Bod1l
chr2	174109821	174172243	Gnas
chr11	100230170	100259104	Jup
chr11	23206895	23390560	Usp34
chr6	100654728	100755075	Gxylt2
chr11	70470678	70476015	Eno3
chr3	67696142	68430404	Iqschfp
chr2	6460744	7317825	Celf2
chr2	172847403	172860232	Rbm38
chr5	23245983	23289529	Pus7
chr13	51295453	51298435	Hist1h2al
chr10	87663842	87708903	Washc3
chr11	48613862	48619743	Rack1
chr11	72609728	72740622	Zzef1
chr12	83717912	84263043	Rgs6
chr8	83223843	83263358	Smarca5
chr15	79116658	79158801	Pla2g6
chr12	17697615	17798734	Hpcal1
chr2	179646851	179711351	Taf4
chr10	122429117	122513561	Mon2
chr6	142959440	143048672	C2cd5
chr8	113370500	113406134	Cog4
chrX	131135718	131141596	Hnrnph2
chr7	52382234	52382315	Snord33
chr4	109125462	109149110	Rnf11
chr17	27054036	27069524	Kifc5b
chr11	67140605	67185089	Myh13
chr7	113043633	113102481	Gm4070
chr1	92500000	92509916	Cops8
chr18	84181019	84257100	Tshz1
chr11	97638840	97643753	Rpl23
chr7	119259533	119302996	Dkk3
chr14	55186306	55196498	Ajuba
chr17	32490992	32526351	Wiz
chr16	84972456	84979696	Gm10791
chr13	6547403	6579395	Pitrm1
chr5	14933649	15162836	Gm21190
chr1	8349820	9289958	Sntg1
chr6	83115918	83150111	Dctn1
chr10	66467823	66504074	Gm31763
chr15	57925602	57966637	Atad2
chr16	57302113	57606980	Cmss1
chr13	3565281	3610354	Tasor2
chr7	91677464	91726849	Gm2115
chr8	97198795	97220142	Pllp
chr7	100006037	100022757	Ddias
chr12	13226113	13255980	Ddx1
chrX	18724019	18724097	Mir222
chr7	130422663	130513429	Arhgap17
chr16	28157869	28753329	Fgf12
chr11	93720557	93747080	Utp18
chr11	88152884	88579591	Msi2
chr7	134335174	134339591	Cd2bp2
chr5	118514990	118605467	Fbxw8
chr16	11203476	11225889	2610020C07Rik
chr9	114597949	114632895	Dync1li1
chr13	23665629	23666076	H2bc7
chr10	110910283	110935206	Nap1l1
chr4	129380413	129419547	Khdrbs1
chr8	46808679	46904651	Sorbs2os
chr10	95403297	95508152	Eea1
chr12	89320165	89569046	Gm21319
chr5	112705765	112744376	Tpst2
chr4	130219236	130337481	Pum1
chr1	129101563	129379549	Mgat5
chr13	74830742	74946208	Cast
chrX	17739701	17857062	Kdm6a
chr6	117629225	117701787	1700030F04Rik
chr8	22887027	22905657	Defb1
chr4	88430958	88432419	Gm13276
chr9	50302630	50313744	Plet1
chr2	50985959	51004631	Rnd3
chr9	72380047	72470756	Rfx7
chr5	128076036	128097762	Slc15a4
chr4	73888401	74051768	Kdm4c
chr13	108514697	108680258	Zswim6
chr13	12706333	12742662	Gpr137b-ps
chr7	133920489	133924028	Ypel3
chr1	74283091	74314783	Arpc2
chr4	98062517	98386294	Patj
chr5	34678899	34696094	Rnf4
chr4	131455393	131475944	Gm12992
chr11	117710551	117717057	Birc5
chr2	175594789	176850107	Gm14405
chr16	31663529	31873442	Dlg1
chr12	103521284	103629064	Rin3
chr2	103983233	104250768	D430041D05Rik
chr3	94114054	94136454	Them4
chr4	131865868	131865984	Snora44
chr11	62062486	62079954	Adora2b
chr4	87415829	87679311	Mllt3
chr4	122960154	122976168	Pabpc4
chr18	74938048	74938109	Scarna17
chr15	79654328	79664763	Cbx6
chr6	66485215	66491101	Mad2l1
chr10	81364656	81393257	Zfp781
chr1	89967354	90116577	Ugt1a9
chr8	126755294	126869622	Galnt2
chr7	15116003	15207827	Nlrp5-ps
chr14	52625752	52640408	Zfp219
chr7	112885104	112891439	Ilk
chr14	79987467	80030604	Sugt1
chr11	75254445	75268219	Wdr81
chr9	122975277	123022312	Zdhhc3
chr14	62221673	62301210	Dleu2
chr6	148936591	149050202	Dennd5b
chr16	59491914	59600873	Crybg3
chr19	46107080	46119801	Ldb1
chr16	45382248	45409166	Cd200
chr3	86882514	86978669	Kirrel
chr4	54960817	55096435	Zfp462
chr7	66528107	67595063	Snhg14
chr11	77994437	77997086	Rpl23a
chr3	138868857	139373263	Stpg2
chr9	48303448	48304080	Gm5617
chr15	78673077	78681332	Cdc42ep1
chr5	135058560	135074198	Rfc2
chr1	36392575	36426026	Kansl3
chr13	98521067	98530918	Rps18-ps4
chr8	19863864	19893010	6820431F20Rik
chr18	32322743	32396405	Map3k2
chr2	69262392	69424086	Lrp2
chr16	75859039	75909511	Samsn1
chr11	99070362	99092331	Smarce1
chr11	23156041	23197597	Xpo1
chr8	112195221	112217194	Ist1
chr3	5218554	5415855	Zfhx4
chr9	111174349	111181595	Epm2aip1
chr11	75609311	75667414	Gm12339
chr17	5841324	5931956	Snx9
chr13	74049910	74075215	Trip13
chr11	70457529	70460541	Slc25a11
chr2	162757244	162762856	Srsf6
chr3	120157252	120589650	6530403H02Rik
chr2	155672622	155756046	Uqcc1
chr11	26685108	26687859	Gm12070
chr7	29524660	29526840	Mrps12
chr1	157882794	157915989	Tor1aip2
chr3	103663718	103716175	Ptpn22
chr12	113826978	113853768	Inf2
chr3	134875527	134936504	Cenpe
chr6	42618001	42660114	Tcaf1
chr15	57701057	57723973	Derl1
chr11	44332458	44379022	Rnf145
chr3	127509925	127540441	Ap1ar
chr7	135110993	135125545	Fus
chr18	37170512	37347311	Pcdha11
chr5	23670781	23689828	Nupl2
chr5	121894762	121902483	Erp29
chr4	145658644	145696039	Zfp981
chr9	120480634	120483770	Rpl14
chr19	5664635	5688908	Pcnx3
chrX	6735538	6896484	Clcn5
chr10	79855284	79862276	Mbd3
chr19	12660358	12671056	A330040F15Rik
chr7	6628154	6649143	Zim1
chr7	5031837	5049780	Epn1
chr15	74874448	74879267	Ly6c1
chr14	56472952	56493573	Nynrin
chr9	70958466	71011096	Aqp9
chr7	135583291	135605187	Tial1
chr2	125860394	125916921	Fgf7
chr4	88696211	88730514	Wincr1
chr3	90052114	90057534	Slc39a1
chr4	131866618	131866673	Snord99
chr11	115358659	115375707	Jpt1
chr11	102977639	102981038	Hexim1
chr9	44144431	44152311	Hmbs
chr1	108434753	108610867	Bcl2
chr1	59538991	59543799	Fzd7
chr7	107756100	107789782	Rab6a
chr3	8802146	8923857	Mrps28
chr6	34253934	34267443	Gm6644
chr18	80323874	80348221	Adnp2
chr19	41599742	41601451	Morf4l1b
chr16	72663394	73046345	Robo1
chr7	112702874	112706903	Smpd1
chr9	56048936	56265857	Peak1
chr16	42725815	42875700	4932412D23Rik
chr14	14117294	14447983	Synpr
chr5	135852010	135870416	Pom121
chr1	89652586	89689003	Atg16l1
chr1	58267241	58325440	Aox4
chr6	82984199	83002560	Loxl3
chr8	35892233	36028744	Tnks
chr15	101904204	101927604	Eif4b
chr6	38457325	38457393	Mir7670
chr12	33063654	33067808	Ccdc71l
chr6	18816318	18829584	Ankrd7
chr9	108941081	108960306	Shisa5
chr16	20331377	20426467	Abcc5
chr4	140798799	140813477	Arhgef19
chr12	109148613	109241624	Bcl11b
chr8	110104280	110112382	Psmd7
chr5	31357153	31380852	Cad
chr8	113835698	113862105	Mlkl
chr5	143664794	143668433	Actb
chr2	117937612	117952869	Thbs1
chr4	149611306	149622982	Eno1
chr11	19962307	20012954	Actr2
chr19	14522562	14672673	Tle4
chr19	24369284	24630362	Pip5k1b
chr2	12998594	13193042	Rsu1
chr7	149646717	149680773	Lsp1
chr9	94570311	95130871	Slc9a9
chr6	119382549	119494365	Wnt5b
chr4	34497864	34514157	Akirin2
chr16	56057643	56190144	Senp7
chr14	73542317	73583861	Rcbtb2
chr11	74991145	75003985	Dph1
chr13	23775342	23775828	H2ac6
chr12	72116954	72200338	Arid4a
chr4	42683822	42884678	4930578G10Rik
chr1	73956806	74171122	Tns1
chr9	21571217	21602990	Kank2
chr7	148653261	148657380	Cd151
chr5	29556342	29704930	Lmbr1
chr9	63984951	64020738	Zwilch
chr9	108393007	108404668	Usp19
chr5	113515343	113650296	2900026A02Rik
chr13	98668550	98976120	Arhgef28
chr10	116507183	116585530	Frs2
chr16	84954681	85173952	App
chr2	155782294	155824636	Cep250
chr18	37112343	37347311	Pcdha4
chr13	64463198	64471828	Ctsl
chr3	145309935	145312949	Ccn1
chr19	32560259	32589860	Minpp1
chr6	115904829	115945023	Plxnd1
chr11	102057061	102091486	Hdac5
chr3	122779437	122939067	Synpo2
chr5	104864130	104870072	Spp1
chr16	45224450	45253008	Btla
chr7	82600420	82899495	Akap13
chr7	117451527	117758434	Sbf2
chr12	71926501	72003221	Frmd6
chr8	113245376	113265301	Mtss2
chr9	37296906	37331735	Msantd2
chr8	108292208	108351108	Ranbp10
chr4	134093807	134108081	Selenon
chr17	75117090	75262910	Ttc27
chr19	42593295	42666746	R3hcc1l
chr6	128380123	128388674	Fkbp4
chr9	108382193	108392861	Lamb2
chr1	6204743	6266185	Rb1cc1
chrX	148667770	148713642	Kdm5c
chr5	137537376	137548142	Serpine1
chr19	53065670	53113144	Xpnpep1
chr1	46482363	46864322	Dnah7c
chr5	114062364	114100399	Cmklr1
chr13	55736360	55782628	Ddx46
chr8	82489750	82581907	Hhip
chr17	24732761	24769572	Tsc2
chr9	65756817	65892821	Csnk1g1
chr15	89220605	89240934	Syce3
chr8	10984681	11008929	Irs2
chr5	54389762	54512296	Stim2
chr9	122084992	122203541	Ano10
chr15	81977699	82035390	Srebf2
chr6	71859047	71929355	Polr1a
chr18	61856491	61867289	Pcyox1l
chr1	158488918	158579750	Abl2
chr14	78892053	78936667	Akap11
chr19	6306457	6325652	Cdc42bpg
chr10	25079604	25243324	Epb41l2
chr17	84589396	84865548	Thada
chr2	131087744	131124924	Pank2
chr16	96583368	96643728	Igsf5
chr7	150699484	150735025	Nap1l4
chr17	31091628	31147655	Umodl1
chr9	101824458	102257023	Ephb1
chr1	92895304	93025521	Lrrfip1
chr8	27131893	27229696	Hook3
chr18	75527019	75555588	Smad7
chr11	98326007	98407345	Ikzf3
chr10	79755176	79756859	Rps15
chr7	91032376	91048821	Mesd
chr18	64659301	64676211	Nars
chr1	164500646	164529211	Vamp4
chr18	37663918	37667314	Pcdhb20
chr11	80290525	80294686	Cdk5r1
chr6	143115750	143157066	Etnk1
chr6	147039597	147061300	Klhl42
chr5	124818711	124875966	Sbno1
chr2	163484122	163551894	Pkig
chr18	83080271	83174706	Zfp516
chr8	86732571	86732657	Mir27a
chr2	103406467	103558580	Abtb2
chr6	8580527	8728484	Ica1
chr7	29595909	29607285	Hnrnpl
chr13	22126991	22127512	H2ac12
chr10	78527119	78560345	2610008E11Rik
chr9	57233763	57287921	Ppcdc
chr4	57858120	57909856	Akap2
chr7	134944123	134947316	Hsd3b7
chr2	119722964	119795317	Mga
chr11	68316521	68366197	Pik3r6
chr1	90594801	90598766	Arl4c
chr10	79002990	79017873	Mier2
chr3	19408595	19510862	Dnajc5b
chr16	23109026	23109093	Snord2
chr6	54458810	54516376	Scrn1
chr16	17797375	17808386	Scarf2
chr14	56206277	56209938	Psme2
chr11	19824445	19922600	Spred2
chr2	125684845	125810034	Galk2
chr3	122122675	122233109	Bcar3
chr19	34996848	35050240	Kif20b
chr16	36885097	36933171	Golgb1
chr12	113209770	113307065	Tdrd9
chr13	54676374	54682489	Arl10
chr15	31221235	31297514	Ankrd33b
chr3	89222473	89233951	Shc1
chr18	37595275	37598308	Pcdhb12
chr8	88241456	88364848	Itfg1
chr7	138009238	138057008	Plekha1
chr4	43644807	43664309	Npr2
chr3	104591952	104597377	Rhoc
chr11	30405992	30549396	Acyp2
chr18	74602273	74931131	Myo5b
chr2	127095965	127124670	Stard7
chr5	75548276	75594231	Pdgfra
chr14	5468460	6240637	LOC100861615
chr17	28726533	28759466	Srpk1
chr10	52056830	52101930	Gopc
chr16	21331973	21333429	Magef1
chr3	20115515	20142080	Cpa3
chr2	143741067	143769060	Dstn
chr4	86394459	86496506	Dennd4c
chr11	60745556	60766313	Map2k3
chr2	70550465	70663537	Tlk1
chr4	58810106	58925621	Ecpas
chr8	108467490	108490015	Slc12a4
chr5	31926812	31999983	Rbks
chr12	45370141	45414422	Pnpla8
chr10	80169701	80205020	Ap3d1
chr3	89050360	89053651	Krtcap2
chr13	29283615	29947542	Cdkal1
chr2	30700887	30736767	Prrx2
chr11	88767242	88797375	Scpep1os
chr2	152119564	152139730	Tbc1d20
chrX	158274362	158597373	Nhs
chr3	115812938	115832606	Vcam1
chr2	153171566	153229743	Asxl1
chr15	34370261	34372988	Gm12191
chr4	148524100	148540814	Pgd
chr2	30328161	30329719	Ier5l
chr4	124392105	124409666	Sf3a3
chr5	6769030	7344378	Zfp804b
chr18	74938866	74965861	Acaa2
chr11	87619930	87639616	Lpo
chr17	27194249	27259168	Itpr3
chr7	135754879	135839950	Inpp5f
chr13	96093560	96107797	Zbed3
chr5	92481171	92566751	G3bp2
chr9	58500663	58589366	Rec114
chrX	103382439	103399038	Pgk1
chr19	10680087	10704318	Ddb1
chr17	89025895	89045064	Ston1
chr8	82163575	82201654	Otud4
chr14	70874362	70920479	Bmp1
chr1	181625168	181675331	Kif28
chr14	70009283	70095641	Loxl2
chr2	164825857	164860279	Ncoa5
chr8	63990228	64381504	Palld
chr15	85888125	85968051	Gramd4
chr3	68808660	68838546	Smc4
chr14	119337154	119380924	Dnajc3
chr11	82577847	82581124	Zfp830
chr4	153385912	153395621	Lrrc47
chr9	20970158	21017692	Pde4a
chr6	119873987	119988673	Wnk1
chr11	100277008	100286154	Fkbp10
chr8	4259731	4275905	Timm44
chr13	21809497	21809984	H3c10
chr7	17579251	17582864	Ccdc8
chr3	88609211	88636469	1500004A13Rik
chr1	92663435	92740548	Col6a3
chr11	62633755	62656450	Trim16
chr10	79221260	79229697	Rnf126
chr2	164611521	164618270	Snx21
chr2	128124399	128255087	Morrbid
chr8	73419658	73419755	Snora68
chr12	86451783	86475041	Dlst
chr7	6658671	6683130	Peg3
chr13	113590985	113658102	Plpp1
chr17	25916788	25922531	Haghl
chr10	45055541	45092287	Bves
chr7	17530031	17534177	Pnmal2
chr16	66655661	67621153	Cadm2
chr13	70727567	70776512	Ice1
chr1	174306662	174314230	Pigm
chr7	3655643	3658499	Rps9
chr3	141128528	141497888	Unc5c
chr17	25872985	25885275	Mslnl
chr13	67897531	67931922	4930525G20Rik
chr4	140301423	140330118	Padi4
chr5	139676591	139725793	Sun1
chr2	167516259	167522913	A530013C23Rik
chr8	122121874	122129140	Taf1c
chr10	116423370	116462096	Best3
chr18	80491283	80560993	Kcng2
chr17	71532872	71599158	Lpin2
chr13	55598848	55614807	Pdlim7
chr17	88840044	88889873	Foxn2
chr7	19761770	19791831	Eml2
chr14	21554095	21613310	Camk2g
chr7	52558525	52589150	Trpm4
chr3	98117094	98143892	Phgdh
chr15	98905404	98913840	Troap
chr12	17273395	17291591	Pdia6
chr17	34248964	34259552	Brd2
chr18	42361952	42421779	Lars
chrX	50406289	50410367	C430049B03Rik
chr4	118781350	118809934	Slc2a1
chr1	88479496	88503403	Cops7b
chr12	113960385	113984802	Cep170b
chr16	96213699	96304035	Brwd1
chr5	74489085	74490362	Dancr
chr17	32458369	32487522	Akap8l
chr13	23653344	23654254	H3c6
chr10	57235582	57252335	Serinc1
chr5	34185761	34240615	Nsd2
chr17	66001066	66122092	Rab31
chr12	81891519	81981820	Susd6
chr11	102165874	102182176	Ubtf
chr6	11875881	12031198	Phf14
chr3	122241637	122322632	Fnbp1l
chr3	101181048	101266983	Igsf3
chr2	34659884	34681755	Fbxw2
chr1	189432885	190038763	Esrrg
chr3	122636519	122687365	Usp53
chr4	131740831	131768171	Ythdf2
chr13	34218877	34222223	Tubb2b
chr10	120202788	120215942	4921513I03Rik
chr16	11216334	11254418	Gspt1
chr14	55126019	55136307	Prmt5
chr5	45825271	45841468	Qdpr
chr10	62523461	62540708	Pbld1
chr11	79859995	79894493	Crlf3
chr5	148241732	148360077	Pan3
chr17	80247730	80295463	Atl2
chr15	91503655	91646555	Lrrk2
chr5	130007106	130077259	Sfswap
chr4	88400772	88401320	Gm13271
chr11	74487451	74537886	Pafah1b1
chr17	28344723	28365553	Def6
chr2	173049966	173102034	Pmepa1
chr4	106806767	106850971	Tceanc2
chr4	137150087	137214452	Usp48
chr19	5425144	5427316	AI837181
chr13	21879357	21881082	Hist1h2bp
chr14	31764563	31802011	Nek4
chr15	98860322	98868536	Tuba1c
chr2	125809219	125977740	Fam227b
chr4	41141348	41222168	Ubap2
chr19	29095322	29122451	Ak3
chr2	145611852	145713352	Rin2
chr17	25397456	25411255	Ube2i
chr4	134876400	134909061	Srrm1
chr9	119392526	119488134	Scn5a
chr16	17152108	17201585	Ube2l3
chr7	29144623	29157681	Plekhg2
chr12	88646008	88729305	Sptlc2
chr6	100178559	100237352	Rybp
chr18	38356348	38369416	Pcdh1
chr11	51577165	51605455	Sar1b
chr11	78285832	78311256	Sarm1
chr10	14425415	14478825	1700016L04Rik
chr1	63094375	63160841	Ino80d
chr10	98725865	98730123	Dusp6
chr17	25655534	25659509	Gm33727
chr12	78038256	78063235	Max
chr17	27559333	27640478	Grm4
chrX	138752536	138825078	Acsl4
chr1	51806602	51972822	Myo1b
chr12	17551679	17558308	Odc1
chr8	86732417	86732491	Mir23a
chr12	82520430	82523026	Adam4
chr2	158235589	158324989	Ralgapb
chr6	83187369	83254939	Slc4a5
chr11	110927478	110938139	Kcnj2
chr6	34972065	35083737	Cnot4
chr9	76949891	77195677	Mlip
chr15	85969531	86016571	Cerk
chr9	69937117	69989364	Fam81a
chr18	12287359	12315876	Riok3
chr11	18780431	18918972	Meis1
chr4	83063628	83115084	Snapc3
chrX	92907017	93126427	Zc3h12b
chr12	58331399	58343155	Prps1l3
chr8	107694574	107741888	Cbfb
chr6	115968636	116143392	Tmcc1
chr13	89794915	89882117	Vcan
chr6	114810646	114919221	Vgll4
chr16	44173510	44227578	Usf3
chr7	30971953	30980172	Capns1
chr11	70452624	70457488	Gp1ba
chr13	97899382	97907881	Nsa2
chr17	35087895	35087953	Snord52
chr14	22318992	22491700	Kat6b
chr9	108107192	108166289	Dag1
chr2	152584468	152656453	Bcl2l1
chr17	26125981	26206463	Rab11fip3
chr4	135840591	135849857	Zfp46
chr17	33879429	33897431	Rab11b
chr11	76590710	76660510	Cpd
chr10	80639376	80645254	Eef2
chr6	136756769	136758595	H2aj
chr6	13019759	13039269	Tmem106b
chr3	65183579	65196475	Ssr3
chr4	140668893	140695711	Szrd1
chrX	12164885	12194177	Atp6ap2
chr14	57893871	58017320	Cryl1
chr15	81416644	81482507	Ep300
chr16	17528075	17531145	Thap7
chr10	43670437	43868634	Crybg1
chrX	91434048	91457990	Eif2s3x
chr11	31770940	31835635	Cpeb4
chr2	72817489	72827306	Sp3os
chr14	70499900	70537766	Bin3
chr12	66066729	66123560	Togaram1
chr19	47806246	47810078	Sfr1
chr1	33965070	34365507	Dst
chr1	34906804	34936430	Plekhb2
chr2	169458009	169898250	Tshz2
chr13	23667632	23668135	H3c4
chr1	157405250	157534363	Acbd6
chr5	141717488	142689745	Sdk1
chr8	96702989	96704227	Mt1
chr9	123276045	123371793	Lars2
chr2	130732231	130856062	Atrn
chrX	73030992	73120521	Pls3
chr11	5176332	5344850	Znrf3
chr4	140257388	140279135	Rcc2
chr2	164786346	164825231	Slc12a5
chr4	155366952	155387719	Sdf4
chr8	111238544	111485536	Zfhx3
chr10	6179460	6373466	Mthfd1l
chr6	92041412	92123052	Nr2c2
chr15	103070885	103075386	Gm5643
chr9	8221889	8241987	1700128F08Rik
chr6	59302455	59376300	Gprin3
chr15	80770469	80770550	Mir5113
chr1	69873544	70771706	Spag16
chr19	46072627	46087876	4930505N22Rik
chr5	108998126	109058796	Gak
chr13	34009787	34094663	Serpinb6a
chr5	37357343	37380221	Wfs1
chr2	155460013	155518120	Trpc4ap
chr9	21172315	21209807	Ilf3
chr5	21390272	21850523	Reln
chr11	102660792	102681000	Gjc1
chr11	68715068	68718036	Rpl26
chr11	105451300	105790617	Tanc2
chr4	154448218	154460462	Rer1
chr5	114550342	114572933	Usp30
chr4	17780040	18045881	Mmp16
chr16	36750250	36785048	Slc15a2
chr14	28242020	28296740	Tasor
chr11	120047964	120051170	2810410L24Rik
chr15	76473825	76490638	Cyhr1
chr11	4380871	4494818	Mtmr3
chr16	32644729	32683579	Tnk2
chr14	73595309	73725629	Rb1
chr11	72420763	72499983	Ube2g1
chr13	51942044	51943843	Gadd45g
chr9	49326393	49376130	Gm11149
chr4	46463798	46485528	Anp32b
chr2	119444034	119475896	Nusap1
chr5	31117014	31168479	Mapre3
chr6	86477324	86514443	1600020E01Rik
chr6	147995938	148131280	Far2
chr1	91573082	91580467	4933400F21Rik
chr11	84984598	84994656	1700125H20Rik
chr4	137549371	137762994	Eif4g3
chr3	148478550	148617599	Adgrl2
chr7	150293159	150612947	Kcnq1
chr4	58298834	58387175	Musk
chrX	151647669	151650992	Sat1
chr9	56785307	56786205	Imp3
chr10	79509911	79519184	Gpx4
chr11	119464219	119760905	Rptor
chrX	12648624	12750453	Usp9x
chr5	3689999	3803124	Ankib1
chr5	22940282	23010051	Kmt2e
chr5	53947018	54048684	Rbpj
chr16	43861526	43889789	Qtrt2
chr18	16747386	16967755	Cdh2
chr3	110049022	110053917	Prmt6
chr14	22650783	22665101	Vdac2
chr13	23548862	23557770	Btn1a1
chr4	137418152	137521144	Ece1
chr13	46775271	46823218	Nup153
chr2	18598645	18608256	Bmi1
chr16	4594713	4615957	Glis2
chr2	155645573	155652661	Eif6
chr7	6659471	6660335	Peg3os
chr1	155066052	155179916	Lamc1
chr1	74552634	74577416	Cnot9
chr13	21902236	21902787	Hist1h2ao
chr11	86891234	86900279	Smg8
chr6	119125271	119171632	Dcp1b
chr11	90197849	90252231	Hlf
chr2	20769546	20889348	Arhgap21
chr13	115748289	115892172	Itga1
chr10	128317580	128328774	Gdf11
chr7	19669198	19679169	Dmpk
chr2	121945844	122011925	Patl2
chr17	79733065	79754431	Cdc42ep3
chr9	53873413	53916218	Tnfaip8l3
chr13	55640677	55672481	Fam193b
chr6	85401499	85418471	Cct7
chr8	48911436	49075898	Wwc2
chrX	19675977	19868953	Slc9a7
chr7	52071740	52096173	Il4i1b
chr14	52606064	52608504	Gm16617
chr7	19661549	19668124	Dmwd
chr17	28369699	28438414	Ppard
chr3	79259893	79371601	Fnip2
chrX	50788095	50796753	Etd
chr16	20097627	20127817	Klhl24
chr17	46811500	46817879	Klhdc3
chr4	136025676	136105233	Luzp1
chr17	45871455	45918201	F630040K05Rik
chr2	29745240	29787266	Odf2
chr17	15115828	15128541	9030025P20Rik
chr16	32877870	32909049	Fyttd1
chr5	73411430	73647857	Fryl
chr7	52132135	52147794	Med25
chr1	88439587	88479360	Pde6d
chr14	57194456	57278635	Parp4
chr17	17980290	17992152	Has1
chr17	62952306	63230666	Efna5
chr7	108086148	108112880	P2ry6
chr17	68192048	68353448	Arhgap28
chr10	45009111	45038256	Popdc3
chr8	87560792	87581481	Tnpo2
chr17	46380869	46384994	Polr1c
chr2	109757804	109854414	Lgr4
chr8	23868194	23893320	Plat
chr5	65779603	65782670	Rpl9
chr7	138485125	138506240	2310057M21Rik
chr11	87190150	87218456	Rad51c
chr4	102843256	102887781	Slc35d1
chr2	117956004	118082692	Fsip1
chr15	82129414	82144988	Wbp2nl
chr4	149656025	149996075	Rere
chr3	138100164	138118463	Adh5
chr16	92601711	92826319	Runx1
chr1	132585620	132625830	Pfkfb2
chr19	17506804	17912122	Pcsk5
chr8	129454564	129469821	Tomm20
chr13	97518248	97679749	Ankrd31
chr3	90416816	90418336	S100a6
chr6	34548504	34725469	Cald1
chr4	35138534	35173085	C9orf72
chr19	24752751	24936332	Pgm5
chr1	59573108	59691353	Gm973
chr16	56690442	56717563	Tfg
chr17	69425017	69639327	Epb41l3
chr1	36619541	36740028	Fam178b
chr4	116692007	116759457	Eif2b3
chr3	88335868	88345316	Mex3a
chr1	71632047	71699808	Fn1
chr15	12251251	12281022	Golph3
chr5	124027803	124134370	Clip1
chr17	45797126	45823167	Tmem63b
chr14	14845005	14939815	Atxn7
chr6	87837934	87863588	Copg1
chr19	4742913	4811599	Gm21992
chr11	121372290	121380656	Zfp750
chr4	140542788	140563616	Atp13a2
chrX	71271931	71331029	Mecp2
chr14	58451539	58509173	Zdhhc20
chr18	66140393	66162289	Lman1
chr1	55042013	55084322	Sf3b1
chr17	34118437	34122303	AA388235
chr7	72441051	72516130	Tjp1
chr14	48740544	48880558	Peli2
chr6	134870419	134875543	Cdkn1b
chr5	37186106	37187993	Mrfap1
chr7	147020073	147063987	Adgra1
chr8	97190500	97198357	Arl2bp
chr11	93811128	93817570	Nme2
chr4	132686548	132754245	Wasf2
chr12	87165870	87394710	Ttll5
chr13	21925612	21929399	Hist1h2br
chr16	8658680	8672246	Carhsp1
chr7	53152439	53172783	Tmem143
chr5	122814593	122822351	Fam216a
chr5	121968613	121971704	Adam1a
chr2	152561987	152563146	Id1
chr5	116575590	116738994	Ccdc60
chr11	97524726	97546772	Mllt6
chr9	107904979	107951113	Ip6k1
chr8	119780919	119985405	Cmip
chr11	106362305	106362377	Snord104
chr1	133181828	133423938	Srgap2
chr13	22127690	22128189	H2bc12
chr11	120439413	120442938	Arhgdia
chr7	19640036	19659796	Rsph6a
chr2	161347724	162486883	Ptprt
chr17	25032065	25033234	Mrps34
chr5	36235968	36346571	Afap1
chr15	78586313	78603875	Mfng
chr7	146038042	146074739	Ppp2r2d
chr5	135663193	135721999	Baz1b
chr7	148195489	148196643	Ifitm3
chr7	138703884	138715406	Bub3
chr17	46266219	46281149	Rsph9
chr8	125372274	125391297	Cdh15
chrX	159198304	159217022	Rbbp7
chr7	51964100	51975218	Izumo2
chr2	153067268	153095985	Pofut1
chr13	59873240	59924508	Tut7
chr3	90016589	90017570	Rps27
chr1	163917433	164408165	Dnm3
chr4	144482730	144518112	Dhrs3
chr6	124760606	124764176	Tpi1
chr5	20492463	20561729	Ptpn12
chr11	75223531	75236125	Serpinf1
chr9	56266426	56344743	Hmg20a
chr16	95924014	95942656	Ets2
chr9	59504175	59527182	Pkm
chr13	28234353	28243464	Prl5a1
chr1	4899657	5060366	Rgs20
chr17	34960938	34973848	Stk19
chr19	46131029	46147399	Pprc1
chr2	25048240	25052333	Tor4a
chr8	32260333	32260430	Snord13
chrX	70587959	70604419	Zfp275
chr3	104597750	104621481	Mov10
chr7	24917391	24928263	Zfp235
chr7	120350979	120457640	Arntl
chr16	18220846	18235229	Zdhhc8
chr2	156138209	156201374	Cnbd2
chr7	52631824	52651112	Snrnp70
chr18	37880030	38001524	Pcdhgb4
chr17	46817402	46820075	Mea1
chr17	14802507	14831269	Thbs2
chr13	18216794	18473873	Pou6f2
chr4	53453285	53635350	Slc44a1
chr7	29161803	29164247	Zfp36
chr3	105673776	105726962	Tmigd3
chr10	127496038	127514310	Ptges3
chr2	32561302	32568304	Cdk9
chr11	95275397	95354724	Spop
chr8	122032052	122082661	Mbtps1
chr12	32858262	32893524	Pik3cg
chr1	45368383	45406551	Col3a1
chrX	130222319	130241801	Gm26851
chr3	32846848	33042113	Pex5l
chr5	8046078	8069314	Sri
chr16	17900802	17911441	Ess2
chr8	11555762	11563251	Ing1
chr7	26179732	26351436	4732471J01Rik
chr19	57107223	57389409	Ablim1
chr14	105657840	105708515	Ndfip2
chr17	46819940	46841975	Ppp2r5d
chr12	60059371	60113004	Sec23a
chr4	41238333	41261934	Dcaf12
chr7	130267399	130338810	Tnrc6a
chr1	141318960	141349584	Zbtb41
chr11	77342664	77421317	Taok1
chr19	5038826	5041134	B4gat1
chr1	193399515	193447569	Ints7
chr1	39251117	39420085	Npas2
chr17	24210647	24287889	Pdpk1
chr9	21397166	21400414	Timm29
chr14	35487114	35561169	Wapl
chr6	52195242	52199768	Hoxa11os
chr3	27315057	27609374	Fndc3b
chr12	70944673	70954658	4931403G20Rik
chr9	62525662	62631786	Itga11
chr7	148068293	148084541	Psmd13
chr8	13105623	13147939	Cul4a
chr18	9312302	9450152	Ccny
chr1	172634588	172797902	Atf6
chr16	18248976	18254865	Trmt2a
chr11	120459735	120469512	Anapc11
chr1	187186923	187252239	Eprs
chr13	97837242	97899477	Fam169a
chr17	47748534	47761200	Med20
chr8	8666576	8690537	Arglu1
chr18	70727946	70785785	Mbd2
chr17	32257765	32303835	Notch3
chr13	3881264	3917466	Net1
chr17	35035419	35051018	Ehmt2
chr7	150255273	150256992	Tssc4
chr14	17263354	17914845	Rarb
chr8_random	111558	163011	Csprs
chr4	41083054	41140403	Ube2r2
chr17	35187188	35195664	Clic1
chr3	88285070	88307274	Lmna
chr13	95794060	96020291	Pde8b
chr1	89991576	90116577	Ugt1a7c
chr2	148498351	148501762	Nxt1
chr11	118305514	118316309	Gm11747
chr16	23224813	23360423	St6gal1
chr7	63097441	63188003	Cyfip1
chr2	120802798	120833578	Tmem62
chr5	100790668	100845253	Sec31a
chr8	87823531	87832178	Orc6
chr5	116015272	116072663	Gcn1
chr1	157692094	157820385	Cep350
chr9	111967595	112138489	Arpp21
chr6	115568589	115626653	Raf1
chr4	111392615	111501745	Spata6
chr10	114822015	114869827	Zfc3h1
chr2	29475240	29595883	Rapgef1
chr17	27110124	27113148	Zbtb9
chr5	139899133	139903754	Gper1
chr17	95159282	95234139	Gm1976
chr2	113167893	113556924	Fmn1
chr6	98875336	99470987	Foxp1
chr11	85166666	85639560	Bcas3
chr8	124754174	124796550	Zfp469
chr7	146434381	146453152	Pwwp2b
chr7	146575008	146765551	Inpp5a
chr10	23504989	23507015	Rps12
chr17	8719666	9179513	Pde10a
chr11	119251413	119348732	Rnf213
chr10	74523641	74647668	Bcr
chr1	94746955	94747020	Mir149
chr15	79963576	79992136	Tab1
chr17	34012611	34027578	Kifc1
chr8	106864494	106871572	Cmtm3
chr4	148702525	148800740	Ube4b
chr5	134659908	134694013	Gtf2ird2
chr7	14318855	14364986	Sult2a2
chr4	48598046	48676003	Tmeff1
chr7	106631295	106631442	Snord15a
chr7	77496836	77511632	Nr2f2
chr5	124990800	125000512	Tmed2
chr19	23377099	23522812	Mamdc2
chr5	119010728	119215446	Med13l
chr12	101437645	101448034	Calm1
chr4	88556461	88556566	Mir31
chr1	59821123	59934925	Bmpr2
chr8	101548371	101940371	Cdh8
chr12	99667647	99816423	Kcnk10
chr17	34056423	34066235	Tapbp
chr13	39024001	39052748	Slc35b3
chr2	94140923	94246846	Ttc17
chr11	83777933	83858078	Synrg
chr18	37152121	37347311	Pcdha8
chr4	88439646	88441201	Gm13275
chr11	116664714	116689360	Mxra7
chr18	42671141	42735439	Tcerg1
chr2	129093946	129122948	Ckap2l
chr11	115753909	115794806	Recql5
chr3	95032346	95040346	Cdc42se1
chr14	30853130	31304342	Cacna1d
chr13	104531693	104564688	Srek1
chr8	126062684	126062804	Gm22109
chr4	44134765	44136995	Gm12504
chr2	129024509	129037348	Slc20a1
chr3	138405172	138567397	Tspan5
chr17	43497380	43596506	Adgrf5
chr2	3031496	3145073	Fam171a1
chr16	4639945	4651166	Vasn
chr3	137711725	137730352	Gm5105
chr17	35133669	35137691	D17H6S56E-5
chr10	128345975	128349874	Cd63
chrX	82947276	83022158	Gk
chr4	40751615	40801570	B4galt1
chr9	21528020	21554362	Ldlr
chr2	26494710	26494841	Snora17
chr13	63402516	63402583	Mir24-1
chr6	4455618	4491543	Col1a2
chr14	21113912	21136800	Nudt13
chr10	62078540	62113966	Ddx50
chr2	130243420	130250377	Pced1a
chr15	54943872	55090828	Deptor
chr12	86216752	86220705	D030025P21Rik
chr10	126602212	126609396	B4galnt1
chr1	185858260	185899515	Dusp10
chr2	101554442	101723184	Prr5l
chr5	123592202	123618639	Setd1b
chr15	99800496	99846789	Larp4
chr8	74842961	74845553	Klf2
chr19	45892634	46072978	Armh3
chr17	64950989	65104450	Man2a1
chr9	43918864	43921134	Rnf26
chr1	157122787	157264574	Xpr1
chr11	109510337	109530977	Prkar1a
chr5	118640745	118695034	Rnft2
chr12	103632292	103678023	Lgmn
chr13	101548694	101556441	Ccnb1
chr4	40090298	40146042	Aco1
chr8	37630793	38015496	Dlc1
chr11	53073316	53113981	Hspa4
chr2	160471633	160548499	Top1
chr14	21514190	21519419	Fut11
chr9	66198257	66356582	Herc1
chr2	165899399	165981183	Sulf2
chr1	33776741	33799409	Rab23
chr19	60837019	60866596	Eif3a
chr15	58247023	58289356	Fam91a1
chr5	3543833	3570546	Fam133b
chr9	41184609	41398102	Mir100hg
chr7	133938748	133943961	Aldoa
chr2	164618268	164630381	Acot8
chr5	99358792	99466098	Prkg2
chrX	74756566	74905604	Tbl1x
chr8	74116083	74120166	Pgls
chr10	40007271	40021992	Amd2
chr18	37974733	38001526	Pcdhgc4
chr1	177592553	177622763	Opn3
chr15	80842711	81021166	Mrtfa
chr11	77590737	77679490	Myo18a
chr11	116711211	116714408	Srsf2
chr4	155484107	155501372	9430015G10Rik
chr7	3289039	3299350	Myadm
chr17	34807480	34856760	Tnxb
chr2	160557046	160601496	Plcg1
chr19	40296729	40346106	Pdlim1
chr11	120823055	120852647	Csnk1d
chr5	136470670	136508751	Dtx2
chr12	8680940	8759389	Pum2
chr18	37854029	38001524	Pcdhga5
chr7	54101174	54110997	Ldha
chr6	47403731	47476143	Cul1
chr9	53619342	53665968	Slc35f2
chr5	108026392	108090872	Rpap2
chr11	69480438	69485925	Eif4a1
chr14	75154480	75347684	Lrch1
chr6	115755532	115758761	Rpl32
chr9	59139379	59164007	Adpgk
chr14	21542952	21553784	Ndst2
chr8	108368578	108375908	Cenpt
chr4	135003046	135050493	Nipal3
chr5	136384249	136410511	Ywhag
chr7	149761435	149764051	H19
chr1	36605484	36615226	Sema4c
chr19	6184410	6224219	Majin
chr3	36472065	36512311	Bbs7
chr11	121313305	121478484	Tbcd
chr6	117961523	118041564	Rasgef1a
chr15	12289466	12669647	Pdzd2
chr5	116889282	117041826	Srrm4
chr11	3024005	3031947	Pisd-ps1
chr2	13948458	13977662	Hacd1
chr12	106944192	107020657	Ak7
chr5	138046335	138052632	Pcolce
chr11	87793027	87811800	Dynll2
[truncated: 3,900 more rows]

## Sheet: Shared LACE-seq peaks
Supplementary Table S2. LACE-seq profiling of YTHDC1 binding in ASC and C2C12 myoblasts.
Shared LACE-seq peaks in ASC48h and C2C12
Chromosome	Begin	End	Strand	P-value
chr1	7769680	7769720	+	0.000166722
chr1	7770460	7770480	+	1.70193e-05
chr1	16057840	16057860	+	8.78392e-08
chr1	29799820	29799840	+	1.38243e-06
chr1	34038260	34038280	+	0.000166722
chr1	34491660	34491720	+	4.65608e-07
chr1	36844960	36844980	+	1.38243e-06
chr1	44000380	44000400	+	8.78392e-08
chr1	48519080	48519120	+	8.34048e-05
chr1	57071000	57071020	+	1.70193e-05
chr1	57280380	57280400	+	7.19457e-09
chr1	58293060	58293080	+	1.38243e-06
chr1	60902480	60902500	+	9.42825e-09
chr1	63238620	63238640	+	1.70193e-05
chr1	64910400	64910420	+	9.42825e-09
chr1	71916680	71916700	+	1.38243e-06
chr1	72215060	72215080	+	9.42825e-09
chr1	74061520	74061540	+	1.70193e-05
chr1	74863320	74863380	+	5.6064e-05
chr1	84816440	84816460	+	9.42825e-09
chr1	87473140	87473160	+	1.70193e-05
chr1	88130100	88130120	+	1.70193e-05
chr1	88973880	88973900	+	0.000166722
chr1	89317720	89317740	+	1.70193e-05
chr1	110750540	110750560	+	8.78392e-08
chr1	112387620	112387640	+	1.38243e-06
chr1	134930900	134930960	+	5.55794e-05
chr1	143965240	143965260	+	9.42825e-09
chr1	149529680	149529700	+	8.78392e-08
chr1	152909160	152909180	+	1.38243e-06
chr1	153505500	153505520	+	9.42825e-09
chr1	159015020	159015040	+	9.42825e-09
chr1	167572400	167572460	+	3.40761e-08
chr1	169270500	169270520	+	7.19457e-09
chr1	171729580	171729600	+	0.000166722
chr1	172964080	172964120	+	4.75169e-08
chr1	172967180	172967220	+	4.75169e-08
chr1	172968140	172968180	+	7.19457e-09
chr1	172994300	172994360	+	4.65608e-07
chr1	172994840	172994880	+	7.19457e-09
chr1	172995500	172995540	+	7.19457e-09
chr1	173001920	173001980	+	7.93913e-09
chr1	173002480	173002520	+	7.19457e-09
chr1	173003140	173003180	+	7.19457e-09
chr1	173009540	173009600	+	7.93913e-09
chr1	173010080	173010140	+	5.67789e-06
chr1	173010760	173010800	+	6.94814e-07
chr1	173031980	173032040	+	7.19457e-09
chr1	173433220	173433280	+	5.55802e-05
chr1	179958160	179958180	+	0.000166722
chr1	180297660	180297680	+	8.78392e-08
chr1	181131120	181131140	+	1.70193e-05
chr1	183219480	183219500	+	9.42825e-09
chr1	183950240	183950260	+	1.38243e-06
chr1	186509240	186509260	+	1.70193e-05
chr1	191010840	191010860	+	1.38243e-06
chr1	191853680	191853700	+	8.78392e-08
chr1	192306840	192306880	+	8.51324e-06
chr1	192306920	192306980	+	5.56063e-05
chr1	194484360	194484380	+	1.70193e-05
chr1	195079400	195079420	+	9.42825e-09
chr10	6220320	6220360	+	8.55356e-06
chr10	11211880	11211900	+	1.70193e-05
chr10	12254380	12254400	+	8.78392e-08
chr10	12642360	12642400	+	8.33644e-05
chr10	25174780	25174800	+	8.78392e-08
chr10	29254720	29254740	+	1.38243e-06
chr10	30240020	30240040	+	7.19457e-09
chr10	30662180	30662200	+	1.38243e-06
chr10	36632360	36632380	+	8.78392e-08
chr10	44160180	44160200	+	7.19457e-09
chr10	53264820	53264840	+	8.78392e-08
chr10	58762660	58762680	+	1.38243e-06
chr10	59440180	59440220	+	8.33644e-05
chr10	60522100	60522120	+	7.19457e-09
chr10	62354860	62354900	+	8.51435e-06
chr10	62892200	62892300	+	3.145e-07
chr10	66261400	66261420	+	7.19457e-09
chr10	74592920	74592940	+	7.19457e-09
chr10	90059760	90059780	+	8.78392e-08
chr10	90644840	90644900	+	3.40761e-08
chr10	92915740	92915780	+	7.19457e-09
chr10	94959620	94959640	+	7.19457e-09
chr10	95540160	95540180	+	0.000166722
chr10	95540480	95540500	+	7.19457e-09
chr10	98525040	98525060	+	1.70193e-05
chr10	99499760	99499780	+	7.19457e-09
chr10	101823080	101823100	+	7.19457e-09
chr10	117099360	117099380	+	0.000166722
chr10	119416920	119416940	+	1.38243e-06
chr10	120369840	120369860	+	1.70193e-05
chr10	122241020	122241040	+	8.78392e-08
chr10	122303720	122303760	+	8.31141e-09
chr10	127895520	127895580	+	7.19457e-09
chr10	127985300	127985320	+	9.42825e-09
chr10	128138740	128138760	+	7.19457e-09
chr11	9869140	9869160	+	1.70193e-05
chr11	17826220	17826240	+	0.000166722
chr11	33655060	33655080	+	7.19457e-09
chr11	42853080	42853100	+	0.000166722
chr11	44341160	44341180	+	1.70193e-05
chr11	48647400	48647440	+	8.51324e-06
chr11	48647940	48647980	+	7.19457e-09
chr11	48670480	48670540	+	4.65608e-07
chr11	51551300	51551320	+	0.000166722
chr11	58115680	58115700	+	7.19457e-09
chr11	58115720	58115740	+	7.19457e-09
chr11	58115980	58116060	+	4.17261e-05
chr11	59350020	59350040	+	1.70193e-05
chr11	64864640	64864660	+	7.19457e-09
chr11	67177880	67177900	+	1.70193e-05
chr11	68854780	68854840	+	5.67789e-06
chr11	68875820	68875880	+	7.19457e-09
chr11	68876540	68876560	+	7.19457e-09
chr11	68932300	68932340	+	8.33644e-05
chr11	68936980	68937000	+	7.19457e-09
chr11	68938120	68938160	+	7.19457e-09
chr11	68938720	68938740	+	7.19457e-09
chr11	69355860	69355880	+	1.70193e-05
chr11	77501380	77501400	+	1.38243e-06
chr11	77553000	77553040	+	6.95931e-07
chr11	81393240	81393260	+	1.38243e-06
chr11	87258000	87258020	+	1.70193e-05
chr11	88194920	88194940	+	7.19457e-09
chr11	94286320	94286340	+	1.70193e-05
chr11	94436020	94436040	+	8.78392e-08
chr11	95720480	95720540	+	3.40761e-08
chr11	97563760	97563820	+	4.66352e-07
chr11	97976640	97976660	+	1.70193e-05
chr11	98691740	98691760	+	1.70193e-05
chr11	99067760	99067780	+	7.19457e-09
chr11	100932960	100932980	+	1.70193e-05
chr11	103934320	103934340	+	7.19457e-09
chr11	104946980	104947000	+	8.78392e-08
chr11	106716780	106716800	+	8.78392e-08
chr11	108873160	108873180	+	7.19457e-09
chr11	110302140	110302160	+	1.70193e-05
chr11	115274620	115274640	+	7.19457e-09
chr11	115902900	115902920	+	7.19457e-09
chr11	116673360	116673380	+	7.19457e-09
chr11	119353940	119353960	+	1.38243e-06
chr12	3608760	3608780	+	0.000166722
chr12	12929640	12929660	+	8.78392e-08
chr12	13170480	13170500	+	0.000166722
chr12	21401160	21401180	+	7.19457e-09
chr12	31943800	31943820	+	1.38243e-06
chr12	31943900	31943920	+	9.42825e-09
chr12	33039940	33039980	+	7.35137e-07
chr12	36756280	36756300	+	7.19457e-09
chr12	37728480	37728500	+	1.70193e-05
chr12	43516060	43516080	+	7.19457e-09
chr12	52695640	52695660	+	1.38243e-06
chr12	55705020	55705040	+	9.42825e-09
chr12	55820220	55820240	+	7.19457e-09
chr12	55820280	55820300	+	8.78392e-08
chr12	55835540	55835660	+	5.8644e-05
chr12	55839440	55839540	+	3.36413e-05
chr12	55839580	55839600	+	0.000166722
chr12	56477080	56477100	+	9.42825e-09
chr12	70462180	70462360	+	1.85405e-05
chr12	70462400	70462460	+	1.13486e-05
chr12	71331780	71331800	+	7.19457e-09
chr12	72070100	72070160	+	6.1363e-06
chr12	73836400	73836420	+	9.42825e-09
chr12	80098000	80098020	+	7.19457e-09
chr12	84185680	84185700	+	8.78392e-08
chr12	85455160	85455180	+	9.42825e-09
chr12	85560740	85560760	+	1.70193e-05
chr12	85962780	85962800	+	9.42825e-09
chr12	87246080	87246100	+	9.42825e-09
chr12	97494400	97494420	+	8.78392e-08
chr12	101268940	101268960	+	1.70193e-05
chr12	103491720	103491740	+	0.000166722
chr12	103521780	103521800	+	8.78392e-08
chr12	112235980	112236000	+	8.78392e-08
chr12	117715260	117715280	+	7.19457e-09
chr13	9833600	9833620	+	8.78392e-08
chr13	16132900	16132920	+	1.70193e-05
chr13	18307100	18307120	+	7.19457e-09
chr13	21252660	21252680	+	7.19457e-09
chr13	21259940	21260000	+	5.60371e-05
chr13	21264780	21264800	+	7.19457e-09
chr13	21307320	21307340	+	7.19457e-09
chr13	21584700	21584740	+	8.33656e-05
chr13	21875020	21875040	+	1.38243e-06
chr13	21947180	21947240	+	5.67789e-06
chr13	21973900	21973960	+	7.19457e-09
chr13	22016820	22016840	+	7.19457e-09
chr13	22023040	22023080	+	8.33644e-05
chr13	22025840	22025880	+	7.19457e-09
chr13	22027380	22027420	+	7.19457e-09
chr13	22028980	22029000	+	7.19457e-09
chr13	22032200	22032240	+	7.19457e-09
chr13	22032780	22032820	+	9.18705e-05
chr13	22086040	22086080	+	4.75169e-08
chr13	22088460	22088500	+	7.19457e-09
chr13	22107660	22107720	+	5.67789e-06
chr13	22113000	22113080	+	4.59394e-05
chr13	22142540	22142580	+	8.33644e-05
chr13	23400920	23400980	+	7.19457e-09
chr13	23492660	23492720	+	6.09576e-08
chr13	23492940	23493000	+	7.19457e-09
chr13	23504800	23504820	+	7.19457e-09
chr13	23504840	23504860	+	8.78392e-08
chr13	23505120	23505180	+	7.19457e-09
chr13	23517500	23517540	+	8.51324e-06
chr13	23518960	23518980	+	7.19457e-09
chr13	23524860	23524880	+	7.19457e-09
chr13	23528860	23528920	+	3.48207e-08
chr13	23529980	23530040	+	4.92489e-07
chr13	23538020	23538060	+	7.19457e-09
chr13	23538660	23538720	+	7.19457e-09
chr13	23545280	23545380	+	3.67686e-05
chr13	23592380	23592440	+	5.67789e-06
chr13	23622220	23622260	+	7.19457e-09
chr13	23643280	23643300	+	1.38243e-06
chr13	23654020	23654040	+	1.70193e-05
chr13	23854000	23854040	+	9.18705e-05
chr13	23895520	23895540	+	8.78392e-08
chr13	28240860	28240880	+	1.38243e-06
chr13	33093540	33093560	+	1.70193e-05
chr13	39050720	39050740	+	9.42825e-09
chr13	44965140	44965180	+	7.19457e-09
chr13	44965300	44965380	+	8.5138e-06
chr13	45479620	45479640	+	1.38243e-06
chr13	45493980	45494000	+	7.19457e-09
chr13	51451820	51451840	+	8.78392e-08
chr13	51731120	51731140	+	1.70193e-05
chr13	55459780	55459800	+	1.70193e-05
chr13	56321960	56321980	+	8.78392e-08
chr13	61428080	61428100	+	7.19457e-09
chr13	93677080	93677100	+	1.38243e-06
chr13	95825220	95825240	+	9.42825e-09
chr13	100738620	100738640	+	0.000166722
chr13	108988620	108988640	+	8.78392e-08
chr13	112383600	112383620	+	9.42825e-09
chr14	5712680	5712700	+	1.70193e-05
chr14	11045000	11045020	+	9.42825e-09
chr14	19473220	19473240	+	1.70193e-05
chr14	21799900	21799920	+	1.38243e-06
chr14	23570540	23570560	+	1.70193e-05
chr14	47992200	47992220	+	1.70193e-05
chr14	51427120	51427160	+	8.55356e-06
chr14	51427360	51427380	+	8.78392e-08
chr14	51427400	51427420	+	7.19457e-09
chr14	51684480	51684540	+	5.67863e-06
chr14	51684840	51684900	+	8.68369e-09
chr14	51702500	51702580	+	2.73557e-08
chr14	54482960	54482980	+	8.78392e-08
chr14	55068820	55068840	+	1.70193e-05
chr14	70699760	70699780	+	7.19457e-09
chr14	70844640	70844660	+	8.78392e-08
chr14	73565080	73565100	+	0.000166722
chr14	75735900	75735920	+	9.42825e-09
chr14	76098740	76098760	+	1.70193e-05
chr14	77390080	77390100	+	8.78392e-08
chr14	99510180	99510200	+	8.78392e-08
chr14	105115160	105115200	+	4.75169e-08
chr14	118488740	118488760	+	7.19457e-09
chr14	119092720	119092740	+	9.42825e-09
chr14	121796480	121796500	+	8.78392e-08
chr15	7710980	7711000	+	1.38243e-06
chr15	10166220	10166240	+	1.38243e-06
chr15	10388100	10388120	+	8.78392e-08
chr15	24175280	24175300	+	9.42825e-09
chr15	26934780	26934800	+	1.70193e-05
chr15	36078860	36078880	+	1.70193e-05
chr15	42501960	42501980	+	1.70193e-05
chr15	54746660	54746680	+	1.38243e-06
chr15	57264760	57264780	+	1.38243e-06
chr15	69227060	69227080	+	7.19457e-09
chr15	78593640	78593660	+	7.19457e-09
chr15	78772940	78772960	+	1.70193e-05
chr15	80760820	80760840	+	0.000166722
chr15	81870000	81870020	+	0.000166722
chr15	89716440	89716460	+	9.42825e-09
chr15	100556080	100556100	+	1.70193e-05
chr15	103052240	103052260	+	1.70193e-05
chr16	7408980	7409000	+	1.38243e-06
chr16	8498120	8498140	+	1.38243e-06
chr16	8701440	8701460	+	1.70193e-05
chr16	14807280	14807300	+	0.000166722
chr16	16958980	16959000	+	1.38243e-06
chr16	17199200	17199220	+	1.38243e-06
chr16	22152000	22152020	+	8.78392e-08
chr16	30373600	30373620	+	7.19457e-09
chr16	32190560	32190600	+	0.000166722
chr16	33692000	33692020	+	9.42825e-09
chr16	35234960	35235000	+	6.95931e-07
chr16	57391360	57391420	+	5.55787e-05
chr16	57391560	57391580	+	7.19457e-09
chr16	59502520	59502540	+	8.78392e-08
chr16	70313320	70313340	+	7.19457e-09
chr16	71175080	71175100	+	1.70193e-05
chr16	81262160	81262180	+	8.78392e-08
chr16	81262220	81262240	+	1.70193e-05
chr16	89159320	89159340	+	1.38243e-06
chr16	91921580	91921600	+	8.78392e-08
chr17	6473140	6473160	+	1.70193e-05
chr17	13624920	13624940	+	0.000166722
chr17	13672860	13672880	+	1.70193e-05
chr17	19874900	19874920	+	0.000166722
chr17	22484880	22484900	+	1.70193e-05
chr17	23672320	23672360	+	8.33644e-05
chr17	23678100	23678120	+	7.19457e-09
chr17	23683440	23683500	+	5.70477e-06
chr17	23685720	23685780	+	5.55787e-05
chr17	26181640	26181660	+	1.70193e-05
chr17	26827620	26827660	+	7.35137e-07
chr17	26963460	26963480	+	1.70193e-05
chr17	27621380	27621400	+	1.38243e-06
chr17	28610040	28610060	+	7.19457e-09
chr17	29655460	29655480	+	0.000166722
chr17	30663880	30663900	+	0.000166722
chr17	32368380	32368400	+	9.42825e-09
chr17	34824640	34824660	+	0.000166722
chr17	35632220	35632240	+	7.19457e-09
chr17	37404140	37404160	+	8.78392e-08
chr17	45533380	45533400	+	1.70193e-05
chr17	47948840	47948860	+	9.42825e-09
chr17	56231420	56231480	+	7.19457e-09
chr17	58773920	58773940	+	0.000166722
chr17	80582920	80582940	+	1.38243e-06
chr17	93646040	93646060	+	1.38243e-06
chr18	3012640	3012680	+	4.75169e-08
chr18	10052120	10052140	+	7.19457e-09
chr18	10151000	10151060	+	5.55802e-05
chr18	10151080	10151120	+	8.55356e-06
chr18	10162600	10162620	+	1.70193e-05
chr18	14561780	14561800	+	7.19457e-09
chr18	14806300	14806360	+	5.67938e-06
chr18	14806380	14806420	+	8.34048e-05
chr18	15333940	15333960	+	1.70193e-05
chr18	20954820	20954840	+	8.78392e-08
chr18	25545220	25545240	+	9.42825e-09
chr18	31772300	31772320	+	0.000166722
chr18	34660520	34660540	+	1.70193e-05
chr18	35073500	35073540	+	9.20086e-06
chr18	35099780	35099800	+	1.38243e-06
chr18	36421420	36421440	+	9.42825e-09
chr18	43742080	43742100	+	1.70193e-05
chr18	49926220	49926240	+	1.38243e-06
chr18	52881060	52881080	+	1.70193e-05
chr18	55782340	55782360	+	1.38243e-06
chr18	55782400	55782420	+	7.19457e-09
chr18	55782460	55782520	+	3.40761e-08
chr18	57274060	57274080	+	7.19457e-09
chr18	57994140	57994160	+	7.19457e-09
chr18	61030380	61030400	+	0.000166722
chr18	67334540	67334580	+	6.94814e-07
chr18	67370820	67370840	+	7.19457e-09
chr18	71582980	71583020	+	8.31141e-09
chr18	74956040	74956060	+	7.19457e-09
chr19	4078380	4078400	+	0.000166722
chr19	5452640	5452660	+	1.38243e-06
chr19	5800180	5800200	+	1.70193e-05
chr19	5801020	5801040	+	0.000166722
chr19	10020040	10020060	+	1.38243e-06
chr19	12084180	12084240	+	5.70477e-06
chr19	19171100	19171120	+	8.78392e-08
chr19	25489020	25489040	+	7.19457e-09
chr19	26765760	26765780	+	8.78392e-08
chr19	26869100	26869120	+	1.70193e-05
chr19	38144000	38144020	+	8.78392e-08
chr19	46026220	46026240	+	1.38243e-06
chr19	47058940	47058980	+	9.18705e-05
chr19	51216960	51216980	+	1.38243e-06
chr19	54024500	54024520	+	1.38243e-06
chr2	5687840	5687860	+	8.78392e-08
chr2	6997240	6997400	+	4.18681e-05
chr2	6997420	6997440	+	1.70193e-05
chr2	18508660	18508720	+	5.67863e-06
chr2	22444760	22444780	+	0.000166722
chr2	22445480	22445520	+	9.18705e-05
chr2	24861700	24861720	+	1.70193e-05
chr2	27297320	27297340	+	0.000166722
chr2	28368840	28368860	+	1.38243e-06
chr2	28843040	28843060	+	1.38243e-06
chr2	28958280	28958300	+	1.38243e-06
chr2	37697600	37697620	+	1.38243e-06
chr2	40779220	40779240	+	8.78392e-08
chr2	52960320	52960340	+	8.78392e-08
chr2	57034820	57034860	+	6.94814e-07
chr2	59795800	59795820	+	8.78392e-08
chr2	59835620	59835640	+	8.78392e-08
chr2	65223380	65223400	+	1.38243e-06
chr2	69711420	69711440	+	7.19457e-09
chr2	71654280	71654300	+	1.70193e-05
chr2	72918200	72918220	+	7.19457e-09
chr2	90191200	90191220	+	1.70193e-05
chr2	90269440	90269460	+	9.42825e-09
chr2	90317300	90317320	+	9.42825e-09
chr2	104295380	104295400	+	1.70193e-05
chr2	106633960	106633980	+	7.19457e-09
chr2	107559700	107559720	+	7.19457e-09
chr2	113316900	113316920	+	1.70193e-05
chr2	113389520	113389540	+	1.70193e-05
chr2	116793780	116793800	+	1.38243e-06
chr2	118005260	118005300	+	1.70193e-05
chr2	119394240	119394260	+	1.70193e-05
chr2	122201240	122201260	+	0.000166722
chr2	122203100	122203120	+	8.78392e-08
chr2	122203140	122203160	+	7.19457e-09
chr2	127091200	127091220	+	1.70193e-05
chr2	128028680	128028700	+	7.19457e-09
chr2	128935200	128935220	+	7.19457e-09
chr2	136537140	136537160	+	1.38243e-06
chr2	139940340	139940360	+	1.70193e-05
chr2	140418080	140418100	+	1.70193e-05
chr2	147474940	147474960	+	1.70193e-05
chr2	155932940	155932960	+	1.38243e-06
chr2	157718360	157718380	+	9.42825e-09
chr2	158182160	158182180	+	9.42825e-09
chr2	162693120	162693140	+	8.78392e-08
chr2	164338040	164338060	+	8.78392e-08
chr2	165720360	165720400	+	6.94814e-07
chr2	169869060	169869080	+	7.19457e-09
chr2	171850620	171850640	+	0.000166722
chr2	174493700	174493720	+	8.78392e-08
chr3	4907360	4907380	+	8.78392e-08
chr3	14513300	14513320	+	1.38243e-06
chr3	17039720	17039740	+	9.42825e-09
chr3	18077520	18077560	+	0.000166722
chr3	18077580	18077600	+	0.000166722
chr3	19527960	19528020	+	5.67863e-06
chr3	31045280	31045300	+	8.78392e-08
chr3	41301020	41301040	+	1.70193e-05
chr3	42258620	42258660	+	9.18705e-05
chr3	44839940	44839960	+	8.78392e-08
chr3	50794600	50794620	+	1.70193e-05
chr3	51142960	51142980	+	7.19457e-09
chr3	66756200	66756220	+	0.000166722
chr3	79309180	79309200	+	1.38243e-06
chr3	84032940	84032980	+	7.19457e-09
chr3	89771960	89772000	+	4.75169e-08
chr3	90279760	90279840	+	8.33846e-05
chr3	94375940	94375960	+	7.19457e-09
chr3	96042640	96042680	+	9.18705e-05
chr3	96138540	96138560	+	0.000166722
chr3	96145080	96145120	+	7.19457e-09
chr3	96163900	96163960	+	4.66352e-07
chr3	96164000	96164020	+	1.38243e-06
chr3	96191340	96191380	+	7.19457e-09
chr3	96202980	96203040	+	5.55787e-05
chr3	96227960	96228000	+	7.19457e-09
chr3	96262000	96262020	+	8.78392e-08
chr3	96262040	96262060	+	9.42825e-09
chr3	96263060	96263120	+	5.55794e-05
chr3	96263960	96264040	+	4.2374e-05
chr3	96264080	96264100	+	8.78392e-08
chr3	96267880	96267960	+	4.59388e-05
chr3	96290480	96290560	+	4.59388e-05
chr3	96290580	96290620	+	8.40521e-05
chr3	96304300	96304320	+	0.000166722
chr3	96304940	96305000	+	5.67789e-06
chr3	96305360	96305400	+	9.20086e-06
chr3	98181720	98181740	+	9.42825e-09
chr3	99511680	99511700	+	0.000166722
chr3	102094460	102094480	+	7.19457e-09
chr3	103510840	103510860	+	1.70193e-05
chr3	108879680	108879700	+	8.78392e-08
chr3	121995860	121995880	+	7.19457e-09
chr3	122668960	122668980	+	0.000166722
chr3	122806680	122806700	+	1.70193e-05
chr3	124921900	124921920	+	1.70193e-05
chr3	126978740	126978760	+	9.42825e-09
chr3	128719980	128720000	+	9.42825e-09
chr3	131012080	131012100	+	9.42825e-09
chr3	136611520	136611540	+	1.70193e-05
chr3	139080720	139080760	+	1.70193e-05
chr3	150507180	150507200	+	1.70193e-05
chr3	150840280	150840300	+	7.19457e-09
chr3	152143600	152143620	+	1.70193e-05
chr4	11327320	11327340	+	9.42825e-09
chr4	13912660	13912680	+	1.70193e-05
chr4	41511480	41511500	+	7.19457e-09
chr4	43505660	43505700	+	9.20086e-06
chr4	43505780	43505920	+	2.64506e-05
chr4	44941380	44941400	+	8.78392e-08
chr4	45779020	45779040	+	1.38243e-06
chr4	51825380	51825440	+	4.92489e-07
chr4	53165860	53165880	+	1.70193e-05
chr4	53963640	53963660	+	1.38243e-06
chr4	55312600	55312620	+	7.19457e-09
chr4	57259960	57259980	+	8.78392e-08
chr4	58851800	58851820	+	1.38243e-06
chr4	65344200	65344220	+	8.78392e-08
chr4	82265560	82265580	+	8.78392e-08
chr4	87565880	87565900	+	1.38243e-06
chr4	97822000	97822020	+	7.19457e-09
chr4	98780520	98780540	+	1.38243e-06
chr4	106347980	106348000	+	1.38243e-06
chr4	107992160	107992180	+	9.42825e-09
chr4	108863420	108863440	+	0.000166722
chr4	113162720	113162740	+	1.38243e-06
chr4	116761660	116761680	+	1.38243e-06
chr4	116827840	116827860	+	1.38243e-06
chr4	117402100	117402140	+	9.18705e-05
chr4	118737880	118737900	+	7.19457e-09
chr4	118961880	118961900	+	0.000166722
chr4	122132520	122132540	+	7.19457e-09
chr4	122633880	122633900	+	8.78392e-08
chr4	124157560	124157580	+	7.19457e-09
chr4	125203860	125203880	+	8.78392e-08
chr4	127151900	127151920	+	8.78392e-08
chr4	128932860	128932880	+	1.70193e-05
chr4	130604780	130604800	+	1.38243e-06
chr4	131605420	131605440	+	7.19457e-09
chr4	131908280	131908320	+	9.20086e-06
chr4	131908720	131908760	+	6.95931e-07
chr4	132670440	132670460	+	8.78392e-08
chr4	141400780	141400800	+	1.38243e-06
chr4	142485580	142485600	+	9.42825e-09
chr4	148576500	148576520	+	7.19457e-09
chr4	150483000	150483020	+	1.70193e-05
chr4	154248400	154248420	+	1.38243e-06
chr4_random	144860	144880	+	9.42825e-09
chr5	3100080	3100100	+	7.19457e-09
chr5	21687400	21687420	+	9.42825e-09
chr5	22647560	22647580	+	9.42825e-09
chr5	24910740	24910760	+	7.19457e-09
chr5	37089060	37089080	+	1.38243e-06
chr5	38174960	38174980	+	7.19457e-09
chr5	53567520	53567540	+	7.19457e-09
chr5	59606200	59606220	+	1.70193e-05
chr5	72559560	72559580	+	7.19457e-09
chr5	72809980	72810000	+	1.70193e-05
chr5	74093940	74093960	+	1.38243e-06
chr5	74278460	74278480	+	7.19457e-09
chr5	77279420	77279440	+	7.19457e-09
chr5	86368320	86368340	+	9.42825e-09
chr5	86440940	86440960	+	1.70193e-05
chr5	87345260	87345280	+	0.000166722
chr5	87725260	87725280	+	0.000166722
chr5	87881880	87881900	+	7.19457e-09
chr5	90766700	90766720	+	1.38243e-06
chr5	92246280	92246300	+	1.70193e-05
chr5	98670260	98670280	+	1.38243e-06
chr5	101421900	101421940	+	8.31141e-09
chr5	103687080	103687100	+	7.19457e-09
chr5	106653000	106653020	+	1.70193e-05
chr5	113439360	113439400	+	8.40521e-05
chr5	114127540	114127560	+	1.38243e-06
chr5	114323320	114323340	+	7.19457e-09
chr5	114922740	114922760	+	1.70193e-05
chr5	118117640	118117660	+	8.78392e-08
chr5	118563560	118563580	+	7.19457e-09
chr5	118641660	118641680	+	7.19457e-09
chr5	122344520	122344560	+	8.34048e-05
chr5	124465600	124465620	+	0.000166722
chr5	125643140	125643160	+	1.70193e-05
chr5	125660900	125660920	+	1.38243e-06
chr5	125866860	125866880	+	7.19457e-09
chr5	125867300	125867340	+	9.18705e-05
chr5	125867540	125867560	+	7.19457e-09
chr5	125868000	125868020	+	7.19457e-09
chr5	125868440	125868480	+	9.18705e-05
chr5	125884620	125884680	+	5.56056e-05
chr5	125886000	125886040	+	8.33644e-05
chr5	125886420	125886440	+	7.19457e-09
chr5	125889400	125889440	+	7.19457e-09
chr5	128992960	128992980	+	1.70193e-05
chr5	130508300	130508340	+	6.94814e-07
chr5	132998260	132998280	+	1.38243e-06
chr5	133037340	133037360	+	8.78392e-08
chr5	133179180	133179200	+	9.42825e-09
chr5	135065340	135065360	+	8.78392e-08
chr5	136539360	136539380	+	9.42825e-09
chr5	137183780	137183800	+	0.000166722
chr5	137538080	137538100	+	1.70193e-05
chr5	140472200	140472220	+	1.70193e-05
chr5	150040580	150040620	+	6.95931e-07
chr5	150059540	150059580	+	8.33644e-05
chr5	150059640	150059660	+	7.19457e-09
chr5	150059720	150059740	+	9.42825e-09
chr5	152502800	152502820	+	1.38243e-06
chr6	5398560	5398580	+	0.000166722
chr6	30094000	30094020	+	7.19457e-09
chr6	39274600	39274620	+	7.19457e-09
chr6	50120300	50120320	+	8.78392e-08
chr6	50349820	50349840	+	1.70193e-05
chr6	50993420	50993440	+	7.19457e-09
chr6	51972380	51972400	+	1.38243e-06
chr6	56633460	56633480	+	1.38243e-06
chr6	56776960	56776980	+	1.70193e-05
chr6	59561180	59561200	+	0.000166722
chr6	70702920	70702940	+	8.78392e-08
chr6	75794260	75794280	+	1.38243e-06
chr6	83386240	83386260	+	1.70193e-05
chr6	83620020	83620040	+	8.78392e-08
chr6	87800200	87800220	+	7.19457e-09
chr6	90769240	90769260	+	7.19457e-09
chr6	98960160	98960180	+	1.38243e-06
chr6	100421560	100421580	+	7.19457e-09
chr6	100560400	100560420	+	1.38243e-06
chr6	100669180	100669200	+	1.70193e-05
chr6	101818920	101818940	+	1.70193e-05
chr6	104860200	104860220	+	1.38243e-06
chr6	108609900	108609920	+	1.70193e-05
chr6	117786400	117786420	+	1.38243e-06
chr6	123145700	123145720	+	7.19457e-09
chr6	124612060	124612080	+	9.42825e-09
chr6	125167320	125167340	+	1.70193e-05
chr6	127925860	127925880	+	1.70193e-05
chr6	132290660	132290680	+	0.000166722
chr6	135699040	135699060	+	7.19457e-09
chr6	145881320	145881380	+	5.60371e-05
chr6	145881480	145881540	+	5.56063e-05
chr7	12552520	12552540	+	1.38243e-06
chr7	16524180	16524200	+	8.78392e-08
chr7	29579000	29579060	+	0.00011115
chr7	36107740	36107760	+	7.19457e-09
chr7	54042200	54042220	+	1.38243e-06
chr7	71054060	71054080	+	7.19457e-09
chr7	76643460	76643500	+	8.33656e-05
chr7	85942800	85942820	+	8.78392e-08
chr7	87863020	87863040	+	7.19457e-09
chr7	91471840	91471860	+	0.000166722
chr7	96357560	96357580	+	9.42825e-09
chr7	97604980	97605000	+	0.000166722
chr7	98815740	98815760	+	0.000166722
chr7	99805240	99805260	+	9.42825e-09
chr7	105761340	105761360	+	1.70193e-05
chr7	105964180	105964240	+	5.70477e-06
chr7	111440200	111440220	+	1.38243e-06
chr7	114761920	114761940	+	1.70193e-05
chr7	116167720	116167740	+	1.70193e-05
chr7	116433980	116434000	+	1.38243e-06
chr7	120289840	120289860	+	0.000166722
chr7	125947740	125947760	+	1.70193e-05
chr7	127978980	127979020	+	4.75169e-08
chr7	127979040	127979060	+	7.19457e-09
chr7	128044140	128044160	+	1.70193e-05
chr7	130472460	130472480	+	7.19457e-09
chr7	131006680	131006700	+	9.42825e-09
chr7	133707400	133707440	+	8.34048e-05
chr7	134190700	134190720	+	8.78392e-08
chr7	136359820	136359840	+	7.19457e-09
chr7	140241440	140241460	+	1.70193e-05
chr7	144205060	144205080	+	1.70193e-05
chr7	146727120	146727140	+	7.19457e-09
chr8	3803260	3803320	+	6.69201e-05
chr8	7428220	7428260	+	7.35137e-07
chr8	8468460	8468480	+	1.38243e-06
chr8	22888080	22888100	+	0.000166722
chr8	23461300	23461320	+	7.19457e-09
chr8	23812460	23812480	+	8.78392e-08
chr8	32260360	32260380	+	1.70193e-05
chr8	32260400	32260420	+	0.000166722
chr8	47656340	47656360	+	1.38243e-06
chr8	53422280	53422320	+	4.75169e-08
chr8	53422420	53422440	+	9.42825e-09
chr8	78395760	78395780	+	7.19457e-09
chr8	80063240	80063260	+	7.19457e-09
chr8	81538280	81538300	+	0.000166722
chr8	92113360	92113380	+	8.78392e-08
chr8	96623380	96623420	+	7.19457e-09
chr8	97227900	97227980	+	7.75299e-09
chr8	111760860	111760880	+	9.42825e-09
chr8	113154460	113154500	+	7.19457e-09
chr8	113155160	113155200	+	4.75169e-08
chr8	114454440	114454460	+	1.70193e-05
chr8	118907780	118907800	+	7.19457e-09
chr8	126089940	126089980	+	9.18705e-05
chr8	126103420	126103460	+	9.18705e-05
chr9	13724400	13724420	+	1.70193e-05
chr9	24905700	24905720	+	1.70193e-05
chr9	26918980	26919000	+	1.38243e-06
chr9	36103820	36103840	+	7.19457e-09
chr9	48723500	48723520	+	1.70193e-05
chr9	50310300	50310320	+	1.38243e-06
chr9	55748520	55748540	+	1.70193e-05
chr9	57615220	57615240	+	7.19457e-09
chr9	59272320	59272340	+	1.38243e-06
chr9	61308780	61308800	+	0.000166722
chr9	61762200	61762220	+	7.19457e-09
chr9	65044420	65044480	+	5.55787e-05
chr9	65049580	65049600	+	8.78392e-08
chr9	65049620	65049640	+	0.000166722
chr9	69784200	69784220	+	1.38243e-06
chr9	77766480	77766500	+	9.42825e-09
chr9	78023220	78023380	+	4.18681e-05
chr9	78023400	78023420	+	7.19457e-09
chr9	83832000	83832020	+	1.38243e-06
chr9	85101840	85101860	+	1.38243e-06
chr9	88177500	88177520	+	0.000166722
chr9	88416360	88416380	+	1.70193e-05
chr9	88421600	88421620	+	1.70193e-05
chr9	88493180	88493200	+	1.70193e-05
chr9	88752560	88752580	+	0.000166722
chr9	90021340	90021400	+	1.13486e-05
chr9	101884500	101884520	+	0.000166722
chr9	102206800	102206820	+	0.000166722
chr9	104311000	104311060	+	7.93913e-09
chr9	108155520	108155540	+	1.38243e-06
chr9	109250040	109250060	+	0.000166722
chr9	109801880	109801900	+	1.70193e-05
chr9	110041240	110041260	+	7.19457e-09
chr9	111087260	111087280	+	7.19457e-09
chr9	114293740	114293760	+	9.42825e-09
chr9	114434720	114434740	+	8.78392e-08
chr9	117951240	117951260	+	7.19457e-09
chr9	119229540	119229560	+	0.000166722
chr9	120595420	120595440	+	7.19457e-09
chr9	123438540	123438600	+	7.19457e-09
chrM	15360	15380	+	9.42825e-09
chrM	15960	15980	+	0.000166722
chrX	10131460	10131480	+	1.70193e-05
chrX	10540040	10540060	+	1.70193e-05
chrX	13892540	13892560	+	8.78392e-08
chrX	46955560	46955580	+	1.38243e-06
chrX	64036580	64036600	+	7.19457e-09
chrX	92917320	92917340	+	1.70193e-05
chrX	96167800	96167820	+	7.19457e-09
chrX	97638700	97638720	+	7.19457e-09
chrX	98287740	98287760	+	7.19457e-09
chrX	98445780	98445800	+	8.78392e-08
chrX	101901440	101901460	+	7.19457e-09
chrX	106211420	106211440	+	8.78392e-08
chrX	128941140	128941160	+	1.38243e-06
chrX	137176760	137176780	+	9.42825e-09
chrX	141949560	141949600	+	7.19457e-09
chrX	147489380	147489400	+	1.38243e-06
chrX	149358260	149358280	+	1.70193e-05
chrX_random	189840	189860	+	7.19457e-09
chrX_random	1035840	1035880	+	8.33644e-05
chrY_random	2421240	2421260	+	0.000166722
chrY_random	5596420	5596440	+	0.000166722
chrY_random	6241640	6241660	+	1.70193e-05
chrY_random	10296840	10296860	+	0.000166722
chrY_random	13963620	13963640	+	0.000166722
chrY_random	15115560	15115580	+	0.000166722
chrY_random	19779980	19780000	+	1.38243e-06
chrY_random	39418280	39418300	+	0.000166722
chrY_random	47924740	47924760	+	1.70193e-05
chrY_random	57104300	57104320	+	1.38243e-06
chr1	13092460	13092480	-	7.19457e-09
chr1	32645460	32645480	-	7.19457e-09
chr1	34043060	34043080	-	9.42825e-09
chr1	37777160	37777180	-	8.78392e-08
chr1	37780260	37780280	-	7.19457e-09
chr1	37904080	37904100	-	1.38243e-06
chr1	38177780	38177800	-	1.70193e-05
chr1	39576460	39576480	-	7.19457e-09
chr1	44255560	44255580	-	7.19457e-09
chr1	55544900	55544920	-	7.19457e-09
chr1	57020380	57020400	-	0.000166722
chr1	59907540	59907560	-	8.78392e-08
chr1	66367200	66367220	-	0.000166722
chr1	72272800	72272820	-	8.78392e-08
chr1	72272920	72272940	-	8.78392e-08
chr1	72283520	72283540	-	9.42825e-09
chr1	72283640	72283660	-	7.19457e-09
chr1	72290780	72290800	-	9.42825e-09
chr1	72290900	72290920	-	7.19457e-09
chr1	72301580	72301600	-	9.42825e-09
chr1	72301700	72301720	-	7.19457e-09
chr1	72892480	72892500	-	1.38243e-06
chr1	73144520	73144540	-	8.78392e-08
chr1	74412360	74412380	-	1.38243e-06
chr1	77322660	77322680	-	1.38243e-06
chr1	80463680	80463700	-	8.78392e-08
chr1	91416380	91416400	-	1.38243e-06
chr1	95346160	95346180	-	9.42825e-09
chr1	97153280	97153300	-	1.70193e-05
chr1	108652520	108652540	-	1.70193e-05
chr1	153198920	153198940	-	1.38243e-06
chr1	157055240	157055260	-	1.38243e-06
chr1	157801700	157801720	-	7.19457e-09
chr1	167571760	167571780	-	7.19457e-09
chr1	169279200	169279220	-	0.000166722
chr1	172023960	172023980	-	1.38243e-06
chr1	172958160	172958220	-	5.70477e-06
chr1	172968740	172968800	-	5.67789e-06
chr1	172975100	172975140	-	7.19457e-09
chr1	172996100	172996160	-	5.67789e-06
chr1	172996760	172996800	-	8.31141e-09
chr1	173003740	173003760	-	7.19457e-09
chr1	173003780	173003800	-	7.19457e-09
chr1	173004420	173004460	-	7.19457e-09
chr1	173011360	173011440	-	8.51324e-06
chr1	173012000	173012040	-	7.19457e-09
chr1	173032500	173032540	-	8.51324e-06
chr1	173032880	173032920	-	7.19457e-09
chr1	173033160	173033220	-	0.00011115
chr1	173041560	173041600	-	8.31141e-09
chr1	173304720	173304740	-	1.70193e-05
chr1	178365960	178365980	-	9.42825e-09
chr1	179681180	179681200	-	1.70193e-05
chr1	183203980	183204000	-	1.70193e-05
chr1	183986180	183986200	-	7.19457e-09
chr1	188433760	188433780	-	8.78392e-08
chr10	6605920	6605940	-	7.19457e-09
chr10	7339540	7339560	-	1.38243e-06
chr10	7519600	7519620	-	1.38243e-06
chr10	8369740	8369760	-	8.78392e-08
chr10	9820800	9820820	-	7.19457e-09
chr10	12083200	12083220	-	8.78392e-08
chr10	12294020	12294040	-	1.70193e-05
chr10	18171160	18171180	-	7.19457e-09
chr10	18614280	18614300	-	1.38243e-06
chr10	19588760	19588780	-	7.19457e-09
chr10	23531480	23531500	-	7.19457e-09
chr10	25089360	25089380	-	1.38243e-06
chr10	25792900	25792920	-	0.000166722
chr10	26912920	26912940	-	9.42825e-09
chr10	30530940	30530980	-	7.19457e-09
chr10	35894860	35894880	-	9.42825e-09
chr10	36484940	36484960	-	1.38243e-06
chr10	39436500	39436520	-	7.19457e-09
chr10	39978400	39978420	-	0.000166722
chr10	53300920	53300940	-	1.70193e-05
chr10	59908580	59908600	-	7.19457e-09
chr10	60479380	60479400	-	8.78392e-08
chr10	60588660	60588680	-	8.78392e-08
chr10	77511420	77511440	-	8.78392e-08
chr10	79371980	79372000	-	1.70193e-05
chr10	79448300	79448320	-	1.70193e-05
chr10	79711900	79711940	-	6.94814e-07
chr10	93901620	93901640	-	7.19457e-09
chr10	95201360	95201380	-	1.38243e-06
chr10	116452260	116452280	-	7.19457e-09
chr10	116483860	116483880	-	7.19457e-09
chr10	121200280	121200300	-	7.19457e-09
chr10	127369480	127369500	-	1.38243e-06
chr11	7769780	7769800	-	7.19457e-09
chr11	7865460	7865480	-	8.78392e-08
chr11	22873160	22873180	-	7.19457e-09
chr11	27224100	27224120	-	1.70193e-05
chr11	32133240	32133260	-	1.70193e-05
chr11	37313840	37313860	-	1.38243e-06
chr11	48632040	48632080	-	8.31141e-09
chr11	48637260	48637280	-	7.19457e-09
chr11	48669780	48669800	-	7.19457e-09
chr11	48670140	48670180	-	7.19457e-09
chr11	58762720	58762740	-	1.38243e-06
chr11	59376820	59376840	-	0.000166722
chr11	62416960	62416980	-	7.19457e-09
chr11	65321040	65321060	-	1.38243e-06
chr11	68850500	68850560	-	7.19457e-09
chr11	68851380	68851400	-	7.19457e-09
chr11	68853880	68853900	-	7.19457e-09
chr11	68854480	68854520	-	7.19457e-09
chr11	68855320	68855340	-	7.19457e-09
chr11	68924000	68924020	-	7.19457e-09
chr11	68924460	68924480	-	7.19457e-09
chr11	68937740	68937800	-	5.55787e-05
chr11	78700560	78700580	-	7.19457e-09
chr11	79518180	79518200	-	7.19457e-09
chr11	83085000	83085020	-	9.42825e-09
chr11	83085120	83085140	-	7.19457e-09
chr11	87007700	87007720	-	9.42825e-09
chr11	87236360	87236380	-	7.19457e-09
chr11	87236460	87236480	-	1.70193e-05
chr11	87240220	87240240	-	7.19457e-09
chr11	87240280	87240360	-	3.51563e-07
chr11	87256800	87256860	-	5.67789e-06
chr11	87262180	87262240	-	5.55787e-05
chr11	87275840	87275900	-	5.55787e-05
chr11	87284920	87284980	-	5.55787e-05
chr11	95894080	95894100	-	7.19457e-09
chr11	97658420	97658440	-	1.38243e-06
chr11	99122600	99122620	-	7.19457e-09
chr11	101466160	101466180	-	9.42825e-09
chr11	101488680	101488720	-	1.38243e-06
chr11	101503060	101503100	-	6.94814e-07
chr11	101503180	101503200	-	7.19457e-09
chr11	101519540	101519560	-	7.19457e-09
chr11	101519660	101519700	-	9.20086e-06
chr11	102142480	102142500	-	7.19457e-09
chr11	102337340	102337360	-	1.70193e-05
chr11	106361960	106361980	-	7.19457e-09
chr11	106588500	106588520	-	1.38243e-06
chr11	106600900	106600920	-	7.19457e-09
chr11	106874180	106874240	-	5.55787e-05
chr11	109764840	109764860	-	1.38243e-06
chr11	113286100	113286120	-	7.19457e-09
chr11	115274320	115274340	-	7.19457e-09
chr11	115502040	115502060	-	7.19457e-09
chr11	121378600	121378620	-	7.19457e-09
chr12	4252420	4252440	-	7.19457e-09
chr12	4765400	4765420	-	0.000166722
chr12	15902580	15902600	-	7.19457e-09
chr12	25152080	25152100	-	7.19457e-09
chr12	29414220	29414240	-	1.38243e-06
chr12	41620300	41620320	-	7.19457e-09
chr12	53704820	53704840	-	0.000166722
chr12	55236120	55236180	-	5.55787e-05
chr12	55322740	55322760	-	1.38243e-06
chr12	55797760	55797780	-	7.19457e-09
chr12	55797860	55797880	-	0.000166722
chr12	55811280	55811320	-	9.18705e-05
chr12	55811360	55811440	-	7.35137e-07
chr12	55815200	55815220	-	7.19457e-09
chr12	55815300	55815320	-	7.19457e-09
chr12	55830580	55830600	-	7.19457e-09
chr12	55830680	55830700	-	1.70193e-05
chr12	56383120	56383140	-	1.38243e-06
chr12	58328680	58328700	-	8.78392e-08
chr12	60141320	60141340	-	7.19457e-09
chr12	70260280	70260300	-	7.19457e-09
chr12	70260400	70260440	-	4.75169e-08
chr12	70260460	70260520	-	3.40761e-08
chr12	71031960	71032000	-	4.75169e-08
chr12	72039040	72039060	-	1.38243e-06
chr12	74795220	74795240	-	0.000166722
chr12	81654420	81654440	-	7.19457e-09
chr12	81924540	81924560	-	8.78392e-08
chr12	96858060	96858080	-	1.38243e-06
chr12	101752220	101752240	-	8.78392e-08
chr12	104318180	104318200	-	7.19457e-09
chr12	112083540	112083600	-	7.19457e-09
chr12	118495080	118495100	-	9.42825e-09
chr12	119449380	119449400	-	1.38243e-06
chr13	4414900	4414920	-	7.19457e-09
chr13	5870200	5870220	-	1.70193e-05
chr13	8912000	8912020	-	7.19457e-09
chr13	19973160	19973180	-	0.000166722
chr13	20250920	20250940	-	1.38243e-06
chr13	21261900	21261960	-	3.40761e-08
chr13	21262060	21262120	-	7.19457e-09
chr13	21264220	21264260	-	4.75169e-08
chr13	21292060	21292080	-	7.19457e-09
chr13	21292100	21292140	-	8.33644e-05
chr13	21314460	21314500	-	8.51324e-06
chr13	21325920	21325960	-	6.94814e-07
chr13	21332820	21332860	-	8.33644e-05
chr13	21334440	21334480	-	8.51324e-06
chr13	21346080	21346140	-	7.19457e-09
chr13	21356480	21356500	-	7.19457e-09
chr13	21367860	21367880	-	7.19457e-09
chr13	21371560	21371580	-	7.19457e-09
chr13	21371600	21371620	-	1.38243e-06
chr13	21802440	21802480	-	7.19457e-09
chr13	21802860	21802900	-	7.19457e-09
chr13	21809700	21809740	-	9.18705e-05
chr13	21809760	21809780	-	0.000166722
chr13	21925920	21925940	-	1.38243e-06
chr13	21998980	21999000	-	7.19457e-09
chr13	21999800	21999820	-	7.19457e-09
chr13	22003180	22003220	-	4.75169e-08
chr13	22006700	22006720	-	7.19457e-09
chr13	22006760	22006780	-	7.19457e-09
chr13	22011080	22011100	-	7.19457e-09
chr13	22011120	22011140	-	7.19457e-09
chr13	22012060	22012100	-	8.78392e-08
chr13	22019720	22019740	-	7.19457e-09
chr13	22019760	22019780	-	7.19457e-09
chr13	22066900	22066940	-	8.31141e-09
chr13	22121080	22121140	-	5.55787e-05
chr13	22135380	22135400	-	1.38243e-06
chr13	23377260	23377320	-	4.65608e-07
chr13	23390640	23390700	-	5.55787e-05
chr13	23390920	23390980	-	4.92489e-07
chr13	23391980	23392040	-	1.13486e-05
chr13	23488920	23488980	-	8.68369e-09
chr13	23518420	23518440	-	7.19457e-09
chr13	23523280	23523340	-	6.1363e-06
chr13	23528200	23528220	-	7.19457e-09
chr13	23542520	23542540	-	7.19457e-09
chr13	23555400	23555440	-	7.19457e-09
chr13	23559000	23559020	-	1.38243e-06
chr13	23589980	23590020	-	8.33644e-05
chr13	23591940	23591980	-	4.75169e-08
chr13	23598380	23598400	-	7.19457e-09
chr13	23609060	23609100	-	7.19457e-09
chr13	23609560	23609600	-	7.19457e-09
chr13	23610000	23610020	-	7.19457e-09
chr13	23610040	23610060	-	7.19457e-09
chr13	23610900	23610960	-	5.70477e-06
chr13	23611480	23611540	-	5.55787e-05
chr13	23613780	23613800	-	7.19457e-09
chr13	23627500	23627520	-	8.78392e-08
chr13	23636520	23636560	-	8.34048e-05
chr13	23667860	23667880	-	0.000166722
chr13	23776380	23776400	-	1.70193e-05
chr13	33122160	33122180	-	8.78392e-08
chr13	44861740	44861760	-	8.78392e-08
chr13	44897720	44897740	-	9.42825e-09
chr13	51175660	51175680	-	1.38243e-06
chr13	51801160	51801180	-	1.70193e-05
chr13	53305220	53305240	-	7.19457e-09
chr13	55306100	55306120	-	1.38243e-06
chr13	55797200	55797220	-	7.19457e-09
chr13	57398820	57398840	-	1.70193e-05
chr13	59493140	59493160	-	1.70193e-05
chr13	63769060	63769080	-	9.42825e-09
chr13	72110920	72110940	-	1.70193e-05
chr13	72829560	72829580	-	8.78392e-08
chr13	73005900	73005940	-	4.75169e-08
chr13	97782360	97782380	-	7.19457e-09
chr13	101541060	101541080	-	1.38243e-06
chr13	104400300	104400320	-	0.000166722
chr13	105433040	105433060	-	1.38243e-06
chr13	105657620	105657640	-	1.70193e-05
chr13	108757640	108757660	-	1.38243e-06
chr13	109791920	109791940	-	8.78392e-08
chr14	9250240	9250260	-	0.000166722
chr14	18491600	18491620	-	1.70193e-05
chr14	22068500	22068520	-	0.000166722
chr14	22082980	22083000	-	1.38243e-06
chr14	25052700	25052720	-	9.42825e-09
chr14	27463640	27463660	-	1.38243e-06
chr14	28078520	28078540	-	1.38243e-06
chr14	30123180	30123200	-	8.78392e-08
chr14	31556940	31556960	-	1.38243e-06
chr14	31951480	31951500	-	1.38243e-06
chr14	40630400	40630420	-	8.78392e-08
chr14	44261060	44261080	-	9.42825e-09
chr14	46432480	46432500	-	7.19457e-09
chr14	48236760	48236780	-	9.42825e-09
chr14	51085700	51085720	-	7.19457e-09
chr14	51683580	51683600	-	7.19457e-09
chr14	51708360	51708380	-	7.19457e-09
chr14	51710320	51710340	-	7.19457e-09
chr14	55136520	55136580	-	5.67789e-06
chr14	61316560	61316580	-	1.38243e-06
chr14	63529540	63529560	-	8.78392e-08
chr14	65505280	65505300	-	0.000166722
chr14	66204600	66204620	-	1.38243e-06
chr14	66423420	66423440	-	7.19457e-09
chr14	76552580	76552620	-	7.19457e-09
chr14	79310180	79310200	-	7.19457e-09
chr14	79881460	79881520	-	4.65608e-07
chr14	102287640	102287660	-	1.70193e-05
chr14	106081040	106081060	-	0.000166722
chr14	121804700	121804720	-	1.70193e-05
chr14	122936900	122936920	-	1.70193e-05
chr15	7031140	7031160	-	1.38243e-06
chr15	15408740	15408760	-	1.70193e-05
chr15	16930820	16930840	-	9.42825e-09
chr15	29060960	29060980	-	7.19457e-09
chr15	34017260	34017280	-	1.70193e-05
chr15	47371540	47371580	-	7.19457e-09
chr15	52006660	52006680	-	7.19457e-09
chr15	58630740	58630760	-	1.70193e-05
chr15	59470500	59470520	-	1.38243e-06
chr15	59474020	59474040	-	1.70193e-05
chr15	72979080	72979100	-	1.38243e-06
chr15	76824000	76824020	-	7.19457e-09
chr15	82980100	82980120	-	1.70193e-05
chr15	82980180	82980200	-	1.38243e-06
chr15	86025320	86025340	-	9.42825e-09
chr15	86295900	86295920	-	7.19457e-09
chr15	89481260	89481280	-	1.70193e-05
chr15	93064780	93064820	-	1.70193e-05
chr15	93064840	93064920	-	4.20296e-05
chr15	93064940	93065000	-	5.67789e-06
chr15	93263780	93263800	-	1.70193e-05
chr15	96550180	96550200	-	1.38243e-06
chr15	96755480	96755500	-	0.000166722
chr15	98851260	98851280	-	8.78392e-08
chr15	99225080	99225100	-	7.19457e-09
chr15	100135120	100135140	-	7.19457e-09
chr15	101141840	101141860	-	7.19457e-09
chr15	101201340	101201360	-	1.70193e-05
chr16	10832740	10832760	-	7.19457e-09
chr16	12784680	12784700	-	8.78392e-08
chr16	17222400	17222420	-	9.42825e-09
chr16	18360860	18360880	-	9.42825e-09
chr16	19464380	19464400	-	1.38243e-06
chr16	21175620	21175640	-	9.42825e-09
chr16	37883120	37883140	-	1.38243e-06
chr16	43182620	43182640	-	7.19457e-09
chr16	44142780	44142800	-	7.19457e-09
chr16	44144760	44144780	-	7.19457e-09
chr16	44278400	44278420	-	9.42825e-09
chr16	45753300	45753320	-	1.38243e-06
chr16	50082720	50082740	-	0.000166722
chr16	56241300	56241320	-	9.42825e-09
chr16	62522100	62522120	-	9.42825e-09
chr16	78226180	78226200	-	1.70193e-05
chr16	87703840	87703860	-	8.78392e-08
chr16	93686660	93686680	-	1.38243e-06
chr16	93686960	93686980	-	7.19457e-09
chr17	3379800	3379820	-	7.19457e-09
chr17	6273580	6273600	-	1.70193e-05
chr17	10523720	10523740	-	8.78392e-08
chr17	18116700	18116720	-	9.42825e-09
chr17	23014680	23014700	-	9.42825e-09
chr17	23670920	23670940	-	7.19457e-09
chr17	23677880	23677900	-	7.19457e-09
chr17	23684320	23684340	-	7.19457e-09
chr17	24155380	24155400	-	1.70193e-05
chr17	26012020	26012040	-	7.19457e-09
chr17	27711340	27711360	-	8.78392e-08
chr17	27876480	27876500	-	8.78392e-08
chr17	33895300	33895320	-	9.42825e-09
chr17	39979940	39979980	-	8.33644e-05
chr17	39980000	39980060	-	0.000111609
chr17	39980480	39980500	-	7.19457e-09
chr17	39980960	39980980	-	1.70193e-05
chr17	39981260	39981280	-	7.19457e-09
chr17	39981320	39981340	-	7.19457e-09
chr17	39982940	39982960	-	7.19457e-09
chr17	39983260	39983300	-	6.95931e-07
chr17	39983600	39983620	-	7.19457e-09
chr17	39985160	39985180	-	7.19457e-09
chr17	45904760	45904780	-	1.70193e-05
chr17	46910660	46910680	-	8.78392e-08
chr17	46989380	46989400	-	1.70193e-05
chr17	47300960	47300980	-	8.78392e-08
chr17	47985780	47985800	-	8.78392e-08
chr17	57119260	57119280	-	1.70193e-05
chr17	57211360	57211380	-	1.70193e-05
chr17	71973320	71973340	-	1.38243e-06
chr17	75147760	75147780	-	0.000166722
chr17	84261320	84261340	-	7.19457e-09
chr17	94471860	94471880	-	0.000166722
chr18	7191400	7191420	-	1.38243e-06
chr18	17049180	17049200	-	7.19457e-09
chr18	26065040	26065060	-	8.78392e-08
chr18	34533180	34533200	-	7.19457e-09
chr18	35023980	35024000	-	1.38243e-06
chr18	35185540	35185560	-	7.19457e-09
chr18	41356140	41356160	-	7.19457e-09
chr18	42563440	42563460	-	7.19457e-09
chr18	61048760	61048780	-	1.70193e-05
chr18	63729380	63729400	-	0.000166722
chr18	65587300	65587320	-	9.42825e-09
chr18	65587400	65587420	-	7.19457e-09
chr18	68519540	68519560	-	7.19457e-09
chr18	75852280	75852300	-	9.42825e-09
chr18	81454120	81454140	-	0.000166722
chr18	82656060	82656080	-	1.70193e-05
chr18	89140780	89140800	-	1.70193e-05
chr18	89484840	89484860	-	7.19457e-09
chr19	3527520	3527540	-	0.000166722
chr19	3576300	3576320	-	7.19457e-09
chr19	4630620	4630640	-	9.42825e-09
chr19	8968260	8968280	-	1.70193e-05
chr19	9590280	9590300	-	7.19457e-09
chr19	12076760	12076780	-	8.78392e-08
chr19	12080520	12080540	-	7.19457e-09
chr19	12080560	12080580	-	9.42825e-09
chr19	12086420	12086460	-	8.31141e-09
chr19	18807260	18807300	-	4.75169e-08
chr19	18807320	18807340	-	1.70193e-05
chr19	24850540	24850560	-	1.38243e-06
chr19	30585320	30585340	-	1.38243e-06
chr19	32955480	32955500	-	7.19457e-09
chr19	35700100	35700120	-	1.70193e-05
chr19	36320020	36320040	-	1.70193e-05
chr19	37022380	37022400	-	8.78392e-08
chr19	40232000	40232020	-	8.78392e-08
chr19	41529240	41529260	-	7.19457e-09
chr19	45824320	45824340	-	7.19457e-09
chr2	4887040	4887060	-	1.70193e-05
chr2	4962420	4962440	-	8.78392e-08
chr2	5852720	5852740	-	8.78392e-08
chr2	9674580	9674600	-	1.70193e-05
chr2	11935620	11935640	-	1.70193e-05
chr2	16604840	16604860	-	7.19457e-09
chr2	20821460	20821480	-	7.19457e-09
chr2	20821640	20821660	-	7.19457e-09
chr2	22443580	22443600	-	1.38243e-06
chr2	23678680	23678720	-	8.33644e-05
chr2	28289740	28289760	-	8.78392e-08
chr2	30290300	30290320	-	7.19457e-09
chr2	30690240	30690260	-	7.19457e-09
chr2	32461700	32461720	-	0.000166722
chr2	32818800	32818820	-	7.19457e-09
chr2	41669060	41669080	-	7.19457e-09
chr2	44968820	44968840	-	1.38243e-06
chr2	65642680	65642700	-	1.38243e-06
chr2	67007300	67007320	-	1.70193e-05
chr2	68681160	68681180	-	1.70193e-05
chr2	71719880	71719900	-	8.78392e-08
chr2	77242080	77242100	-	8.78392e-08
chr2	83849420	83849440	-	1.70193e-05
chr2	86707680	86707700	-	0.000166722
chr2	90035760	90035780	-	1.70193e-05
chr2	90492600	90492620	-	7.19457e-09
chr2	93119160	93119180	-	1.70193e-05
chr2	94217220	94217240	-	1.70193e-05
chr2	106039360	106039380	-	1.70193e-05
chr2	109780220	109780240	-	1.38243e-06
chr2	117074000	117074020	-	7.19457e-09
chr2	117074060	117074080	-	1.70193e-05
chr2	117074100	117074120	-	1.70193e-05
chr2	120829920	120829940	-	7.19457e-09
chr2	122203700	122203720	-	7.19457e-09
chr2	128081940	128081960	-	1.70193e-05
chr2	132834260	132834300	-	8.51435e-06
chr2	137223300	137223320	-	7.19457e-09
chr2	141466260	141466280	-	0.000166722
chr2	144125060	144125080	-	8.78392e-08
chr2	154325700	154325720	-	9.42825e-09
chr2	162787380	162787400	-	7.19457e-09
chr2	168816900	168816920	-	1.70193e-05
chr2	168961300	168961320	-	8.78392e-08
chr2	170113400	170113420	-	7.19457e-09
chr2	170369180	170369200	-	1.38243e-06
chr2	172877340	172877360	-	9.42825e-09
chr2	179917300	179917320	-	1.38243e-06
chr3	18781720	18781740	-	7.19457e-09
chr3	19460280	19460300	-	1.70193e-05
chr3	19460320	19460340	-	1.70193e-05
chr3	19528820	19528840	-	7.19457e-09
chr3	19986700	19986720	-	7.19457e-09
chr3	30500180	30500220	-	7.19457e-09
chr3	45787640	45787660	-	1.70193e-05
chr3	48758640	48758660	-	7.19457e-09
chr3	51162280	51162320	-	4.75169e-08
chr3	51163320	51163380	-	5.56056e-05
chr3	66859920	66859940	-	1.70193e-05
chr3	68409320	68409340	-	1.70193e-05
chr3	86041940	86041960	-	1.70193e-05
chr3	88395920	88395940	-	1.38243e-06
chr3	90516620	90516640	-	1.70193e-05
chr3	96050980	96051020	-	9.18705e-05
chr3	96072780	96072820	-	8.78392e-08
chr3	96132340	96132360	-	7.19457e-09
chr3	96132420	96132460	-	0.000166722
chr3	96136660	96136700	-	4.75169e-08
chr3	96150620	96150640	-	7.19457e-09
chr3	96177940	96177960	-	1.38243e-06
chr3	96178000	96178020	-	1.70193e-05
chr3	96178040	96178060	-	7.19457e-09
chr3	96186840	96186880	-	7.19457e-09
chr3	96213980	96214000	-	7.19457e-09
chr3	96226660	96226680	-	7.19457e-09
chr3	96239880	96239940	-	6.12494e-05
chr3	96245440	96245460	-	9.42825e-09
chr3	96254360	96254380	-	7.19457e-09
chr3	96254440	96254480	-	9.18705e-05
chr3	96255340	96255400	-	4.93234e-07
chr3	96256400	96256420	-	7.19457e-09
chr3	96283320	96283340	-	7.19457e-09
chr3	96292640	96292680	-	1.70193e-05
chr3	96292720	96292760	-	8.55356e-06
chr3	96301700	96301740	-	6.94814e-07
chr3	96962000	96962040	-	4.75169e-08
chr3	97485400	97485420	-	7.19457e-09
chr3	101011320	101011340	-	8.78392e-08
chr3	107122940	107122960	-	8.78392e-08
chr3	108926000	108926020	-	8.78392e-08
chr3	109489540	109489560	-	8.78392e-08
chr3	121281820	121281840	-	9.42825e-09
chr3	129660420	129660440	-	1.70193e-05
chr3	130659580	130659600	-	9.42825e-09
chr3	133439040	133439060	-	7.19457e-09
chr3	133998840	133998860	-	7.19457e-09
chr3	134436700	134436720	-	7.19457e-09
chr3	148691940	148691960	-	1.70193e-05
chr3	148958880	148958900	-	8.78392e-08
chr3	151271340	151271360	-	1.38243e-06
chr3	152048000	152048020	-	1.70193e-05
chr3	153870260	153870280	-	7.19457e-09
chr3	154446060	154446080	-	1.70193e-05
chr4	7318940	7318960	-	7.19457e-09
chr4	10801200	10801220	-	7.19457e-09
chr4	10801240	10801280	-	8.51324e-06
chr4	19628000	19628020	-	0.000166722
chr4	27831920	27831980	-	5.67863e-06
chr4	32317260	32317280	-	7.19457e-09
chr4	35914100	35914120	-	1.70193e-05
chr4	37412020	37412040	-	0.000166722
chr4	42065760	42065780	-	1.38243e-06
chr4	43733520	43733540	-	7.19457e-09
chr4	48775380	48775400	-	1.70193e-05
chr4	53352860	53352880	-	7.19457e-09
chr4	54481220	54481240	-	9.42825e-09
chr4	54481340	54481360	-	7.19457e-09
chr4	59219860	59219880	-	1.70193e-05
chr4	65512480	65512500	-	1.70193e-05
chr4	75924620	75924640	-	9.42825e-09
chr4	77909600	77909620	-	0.000166722
chr4	83134260	83134280	-	7.19457e-09
chr4	86656080	86656100	-	1.38243e-06
chr4	86721620	86721640	-	1.70193e-05
chr4	94542380	94542400	-	1.38243e-06
chr4	99293140	99293160	-	7.19457e-09
chr4	99839000	99839020	-	1.70193e-05
chr4	100746580	100746600	-	1.70193e-05
chr4	100923260	100923280	-	1.38243e-06
chr4	107889320	107889340	-	1.70193e-05
chr4	108239620	108239640	-	1.70193e-05
chr4	116556400	116556420	-	7.19457e-09
chr4	116862540	116862600	-	6.12763e-05
chr4	116883440	116883500	-	5.56063e-05
chr4	117422400	117422420	-	9.42825e-09
chr4	119291740	119291760	-	8.78392e-08
chr4	122970400	122970420	-	9.42825e-09
chr4	133057740	133057760	-	9.42825e-09
chr4	142914440	142914460	-	7.19457e-09
chr4	148946560	148946580	-	1.38243e-06
chr4	149191820	149191840	-	7.19457e-09
chr4	151994280	151994300	-	1.70193e-05
chr4	153734680	153734700	-	9.42825e-09
chr5	7654680	7654700	-	7.19457e-09
chr5	10519380	10519400	-	1.70193e-05
chr5	30439780	30439800	-	9.42825e-09
chr5	31190500	31190520	-	7.19457e-09
chr5	31190880	31190940	-	4.92489e-07
chr5	33766080	33766100	-	1.38243e-06
chr5	37157680	37157700	-	7.19457e-09
chr5	38937680	38937720	-	8.33644e-05
chr5	47191940	47191960	-	1.38243e-06
chr5	49523240	49523260	-	9.42825e-09
chr5	53388600	53388620	-	1.70193e-05
chr5	60434060	60434080	-	7.19457e-09
chr5	66541300	66541320	-	1.70193e-05
chr5	77942000	77942020	-	7.19457e-09
chr5	89187640	89187660	-	1.70193e-05
chr5	93580800	93580820	-	1.70193e-05
chr5	95422340	95422360	-	1.70193e-05
chr5	104501340	104501360	-	7.19457e-09
chr5	105291120	105291140	-	0.000166722
chr5	115269180	115269200	-	7.19457e-09
chr5	115939460	115939500	-	7.19457e-09
chr5	115939540	115939560	-	8.78392e-08
chr5	115940260	115940280	-	7.19457e-09
chr5	116023640	116023660	-	9.42825e-09
chr5	116675180	116675200	-	9.42825e-09
chr5	119547480	119547500	-	9.42825e-09
chr5	122314600	122314620	-	7.19457e-09
chr5	122821820	122821840	-	1.38243e-06
chr5	122885860	122885880	-	8.78392e-08
chr5	123466440	123466460	-	1.70193e-05
chr5	123812600	123812620	-	7.19457e-09
chr5	124078200	124078220	-	7.19457e-09
chr5	125987740	125987760	-	1.70193e-05
chr5	130734580	130734600	-	7.19457e-09
chr5	130785240	130785260	-	7.19457e-09
chr5	134680380	134680400	-	1.38243e-06
chr5	135293140	135293160	-	7.19457e-09
chr5	135667980	135668000	-	1.70193e-05
chr5	137458640	137458660	-	0.000166722
chr5	139981100	139981120	-	1.38243e-06
chr5	140320880	140320900	-	9.42825e-09
chr5	140320940	140320980	-	6.94814e-07
chr5	145528340	145528360	-	1.38243e-06
chr5	147072860	147072900	-	8.51324e-06
chr5	147730400	147730420	-	7.19457e-09
chr5	148898000	148898020	-	1.70193e-05
chr5	149942040	149942060	-	1.38243e-06
chr5	150807440	150807460	-	7.19457e-09
chr5	151799620	151799640	-	1.38243e-06
chr6	4064900	4064920	-	7.19457e-09
chr6	4924040	4924060	-	1.70193e-05
chr6	10050360	10050400	-	8.31141e-09
chr6	17103640	17103660	-	1.70193e-05
chr6	25866480	25866500	-	1.70193e-05
chr6	28917060	28917080	-	1.70193e-05
chr6	29338820	29338840	-	7.19457e-09
chr6	29527600	29527620	-	8.78392e-08
chr6	30840540	30840560	-	0.000166722
chr6	31477960	31477980	-	0.000166722
chr6	31649260	31649280	-	8.78392e-08
chr6	37946800	37946820	-	1.38243e-06
chr6	38483920	38483980	-	7.93913e-09
chr6	39723180	39723200	-	1.38243e-06
chr6	44742920	44742940	-	7.19457e-09
chr6	44743100	44743120	-	7.19457e-09
chr6	47731680	47731700	-	7.19457e-09
chr6	47929020	47929040	-	1.38243e-06
chr6	48239220	48239240	-	7.19457e-09
chr6	53383960	53383980	-	1.38243e-06
chr6	58793540	58793560	-	1.70193e-05
chr6	69466360	69466440	-	7.19457e-09
chr6	69466460	69466520	-	5.70477e-06
chr6	79768140	79768160	-	1.38243e-06
chr6	83218020	83218040	-	7.19457e-09
chr6	83239760	83239780	-	8.78392e-08
chr6	86353880	86353900	-	7.19457e-09
chr6	86478360	86478380	-	7.19457e-09
chr6	91777060	91777080	-	7.19457e-09
chr6	92358700	92358720	-	1.38243e-06
chr6	94729260	94729280	-	1.70193e-05
chr6	100402140	100402160	-	1.70193e-05
chr6	100512360	100512380	-	8.78392e-08
chr6	117862000	117862020	-	0.000166722
chr6	120740300	120740320	-	7.19457e-09
chr6	122743340	122743360	-	1.70193e-05
chr6	125478580	125478600	-	7.19457e-09
chr6	128779080	128779100	-	7.19457e-09
chr6	140479580	140479600	-	9.42825e-09
chr6	147273320	147273340	-	1.70193e-05
chr6	148307100	148307120	-	7.19457e-09
chr6	148357100	148357120	-	7.19457e-09
chr7	3659080	3659100	-	7.19457e-09
chr7	13711500	13711520	-	9.42825e-09
chr7	19827480	19827500	-	0.000166722
chr7	29158060	29158080	-	7.19457e-09
chr7	29245780	29245800	-	7.19457e-09
chr7	29578840	29578860	-	0.000166722
chr7	39040240	39040260	-	1.38243e-06
chr7	51028260	51028280	-	0.000166722
chr7	53705820	53705840	-	1.38243e-06
chr7	63422180	63422200	-	1.38243e-06
chr7	65654680	65654720	-	7.19457e-09
chr7	80296540	80296560	-	7.19457e-09
chr7	85815620	85815640	-	9.42825e-09
chr7	86611340	86611360	-	7.19457e-09
chr7	97590480	97590500	-	7.19457e-09
chr7	102320440	102320460	-	0.000166722
chr7	105963920	105963980	-	5.55787e-05
chr7	110420160	110420200	-	7.19457e-09
chr7	117382140	117382160	-	9.42825e-09
chr7	117644620	117644640	-	7.19457e-09
chr7	119302240	119302260	-	7.19457e-09
chr7	123595920	123595940	-	7.19457e-09
chr7	128061020	128061080	-	7.93913e-09
chr7	132800020	132800040	-	1.70193e-05
chr7	137676840	137676860	-	1.70193e-05
chr7	141228260	141228280	-	1.70193e-05
chr7	141905580	141905600	-	8.78392e-08
chr7	142325280	142325300	-	8.78392e-08
chr7	148227220	148227240	-	7.19457e-09
chr7	148546040	148546060	-	1.38243e-06
chr7	151375640	151375660	-	1.38243e-06
chr8	6553920	6553940	-	8.78392e-08
chr8	15519920	15519940	-	7.19457e-09
chr8	24000120	24000160	-	9.18705e-05
chr8	25978440	25978460	-	1.70193e-05
chr8	34611800	34611820	-	0.000166722
chr8	39276280	39276300	-	7.19457e-09
chr8	60089840	60089860	-	1.70193e-05
chr8	63541960	63541980	-	1.70193e-05
chr8	67590760	67590780	-	1.70193e-05
chr8	74789560	74789580	-	1.70193e-05
chr8	90464220	90464240	-	1.70193e-05
chr8	97227520	97227540	-	7.19457e-09
chr8	97227560	97227580	-	7.19457e-09
chr8	97526720	97526740	-	1.38243e-06
chr8	109080220	109080240	-	7.19457e-09
chr8	113586460	113586500	-	8.33644e-05
chr8	114432760	114432780	-	1.70193e-05
chr8	117711080	117711100	-	8.78392e-08
chr8	119652340	119652360	-	7.19457e-09
chr8	121371120	121371140	-	7.19457e-09
chr8	121700420	121700440	-	1.70193e-05
chr8	124828320	124828340	-	1.38243e-06
chr8	126549260	126549280	-	1.70193e-05
chr8	126881140	126881160	-	1.70193e-05
chr8	129631020	129631040	-	7.19457e-09
chr8	129674040	129674060	-	1.38243e-06
chr9	6908860	6908880	-	9.42825e-09
chr9	21133740	21133760	-	7.19457e-09
chr9	27001240	27001260	-	1.38243e-06
chr9	53593300	53593320	-	7.19457e-09
chr9	62379100	62379120	-	8.78392e-08
chr9	62409680	62409700	-	1.38243e-06
chr9	64007380	64007400	-	1.70193e-05
chr9	64585860	64585880	-	7.19457e-09
chr9	65217960	65217980	-	8.78392e-08
chr9	67163260	67163280	-	7.19457e-09
chr9	67662560	67662580	-	7.19457e-09
chr9	74247120	74247140	-	1.38243e-06
chr9	85935040	85935060	-	7.19457e-09
chr9	88441600	88441620	-	7.19457e-09
chr9	89960640	89960660	-	0.000166722
chr9	96588760	96588780	-	9.42825e-09
chr9	97135980	97136000	-	1.70193e-05
chr9	99567380	99567400	-	1.38243e-06
chr9	100953460	100953480	-	1.38243e-06
chr9	106747420	106747440	-	1.38243e-06
chr9	119412100	119412120	-	1.38243e-06
chr9	120038600	120038620	-	1.70193e-05
chr9	123371200	123371220	-	0.000166722
chrM	60	80	-	7.19457e-09
chrM	180	220	-	4.75169e-08
chrM	280	320	-	4.75169e-08
chrM	580	640	-	6.1363e-06
chrM	660	680	-	9.42825e-09
chrM	740	760	-	8.78392e-08
chrM	880	920	-	6.94814e-07
chrM	940	960	-	7.19457e-09
chrM	1040	1060	-	7.19457e-09
chrM	1080	1100	-	7.19457e-09
chrM	1320	1340	-	7.19457e-09
chrM	1360	1380	-	0.000166722
chrM	1520	1540	-	7.19457e-09
chrM	1740	1760	-	0.000166722
chrM	1840	1880	-	4.75169e-08
chrM	1940	1980	-	7.35137e-07
chrM	2000	2020	-	9.42825e-09
chrM	2200	2220	-	8.78392e-08
chrM	2240	2260	-	9.42825e-09
chrM	2480	2500	-	1.38243e-06
chrM	2640	2660	-	7.19457e-09
chrM	3740	3760	-	9.42825e-09
chrM	3860	3880	-	7.19457e-09
chrM	4960	4980	-	7.19457e-09
chrM	5700	5720	-	9.42825e-09
chrM	5980	6000	-	0.000166722
chrM	6520	6540	-	0.000166722
chrX	11467820	11467840	-	1.70193e-05
chrX	34281240	34281260	-	0.000166722
chrX	38579040	38579080	-	7.19457e-09
chrX	43509240	43509260	-	1.70193e-05
chrX	51859560	51859580	-	1.70193e-05
chrX	52041560	52041580	-	1.70193e-05
chrX	84483680	84483700	-	8.78392e-08
chrX	86247360	86247380	-	1.70193e-05
chrX	91457220	91457240	-	1.70193e-05
chrX	108490820	108490880	-	5.55787e-05
chrX	113985420	113985440	-	1.70193e-05
chrX	157204040	157204080	-	7.19457e-09
chrY_random	55977100	55977120	-	7.19457e-09

## Sheet: ASC YTHDC1-m6A peak
Supplementary Table S2. LACE-seq profiling of YTHDC1 binding in ASC and C2C12 myoblasts.
All YTHDC1 binding peaks overlapping with meRIP-seq peaks in ASC48h.
Chromosome	Begin	End	Strand	P-value
chr1	165926780	165926800	+	1.38243e-06
chr10	25174780	25174800	+	8.78392e-08
chr10	127985300	127985320	+	9.42825e-09
chr11	77501380	77501400	+	1.38243e-06
chr11	77553000	77553040	+	6.95931e-07
chr11	98691740	98691760	+	1.70193e-05
chr11	116673360	116673380	+	7.19457e-09
chr14	75735900	75735920	+	9.42825e-09
chr15	10388100	10388120	+	8.78392e-08
chr16	44736420	44736440	+	1.70193e-05
chr17	45533380	45533400	+	1.70193e-05
chr19	5452640	5452660	+	1.38243e-06
chr19	38144000	38144020	+	8.78392e-08
chr2	59795800	59795820	+	8.78392e-08
chr2	68160080	68160100	+	0.000166722
chr4	116827840	116827860	+	1.38243e-06
chr4	118961880	118961900	+	0.000166722
chr5	124034980	124035000	+	0.000166722
chr7	16524180	16524200	+	8.78392e-08
chr7	56125500	56125520	+	9.42825e-09
chr7	87863020	87863040	+	7.19457e-09
chr7	128044140	128044160	+	1.70193e-05
chr7	133707400	133707440	+	8.34048e-05
chr7	134846140	134846160	+	0.000166722
chr9	111087260	111087280	+	7.19457e-09
chr9	119229540	119229560	+	0.000166722
chrM	6860	6880	+	7.19457e-09
chrX	132780680	132780700	+	1.70193e-05
chr11	4970880	4970900	-	0.000166722
chr11	22873160	22873180	-	7.19457e-09
chr13	105433040	105433060	-	1.38243e-06
chr15	34017260	34017280	-	1.70193e-05
chr15	63944820	63944840	-	0.000166722
chr16	44142780	44142800	-	7.19457e-09
chr16	44144760	44144780	-	7.19457e-09
chr17	26307400	26307420	-	1.70193e-05
chr19	8968260	8968280	-	1.70193e-05
chr2	32818800	32818820	-	7.19457e-09
chr2	32818900	32818920	-	8.78392e-08
chr2	37414580	37414600	-	0.000166722
chr2	59190500	59190520	-	0.000166722
chr2	121811660	121811680	-	1.70193e-05
chr2	165641140	165641160	-	0.000166722
chr3	66859920	66859940	-	1.70193e-05
chr4	99434080	99434100	-	8.78392e-08
chr4	108239620	108239640	-	1.70193e-05
chr4	122970400	122970420	-	9.42825e-09
chr5	93556740	93556760	-	0.000166722
chr5	93580800	93580820	-	1.70193e-05
chr5	124078200	124078220	-	7.19457e-09
chr8	63541960	63541980	-	1.70193e-05
chr8	108173180	108173200	-	1.70193e-05
chr9	106789300	106789320	-	1.70193e-05
chrM	3560	3580	-	1.70193e-05
chrM	5700	5720	-	9.42825e-09
chrM	5980	6000	-	0.000166722

## Sheet: ASC YTHDC1-m6A gene
Supplementary Table S2. LACE-seq profiling of YTHDC1 binding in ASC and C2C12 myoblasts.
m6A-YTHDC1 binding genes in ASC.
Chromosome	Begin	End	Name
chr15	10376518	10400271	Dnajc21
chr11	77499641	77531468	Nufip2
chr2	121781737	121841062	Ctdspl2
chr13	105421220	105607033	Cwc27
chr9	106786316	106789331	Rbm15b
chr7	16523185	16531457	Nop53
chr2	58998907	59193262	Pkp4
chr19	8967477	8972380	Ints5
chr4	122960154	122976168	Pabpc4
chr10	25079604	25243324	Epb41l2
chr5	124027803	124134370	Clip1
chr11	116664714	116689360	Mxra7
chr17	45528839	45570656	Cdc5l
chr7	127986345	128050733	Eef2k
chr11	4969690	4999099	Ewsr1
chr7	16524111	16524209	Snord23
chr8	108160438	108206822	Ctcf
chr2	59737420	59963797	Baz2b
chr2	68048504	68310038	Stk39
chr15	63918402	64214481	Asap1
chr2	37298805	37421957	Rabgap1
chr7	134804968	134852280	Bcl7c
chr9	119147551	119231545	Oxsr1
chrX	132779619	132781678	Tceal9
chr16	44724414	44737397	Nepro
chr3	66789584	67162325	Rsrc1
chr5	93522442	93610404	Septin11
chr10	127985166	127986224	Rpl41
chr8	63471990	63610143	Nek1
chr1	165925020	165927376	Mettl18
chr11	98671122	98695121	Casc3
chr7	56121799	56136966	E2f8
chr11	22799728	22882284	Commd1
chr2	32817232	32819565	Rpl12
chr4	116826441	116828737	Rps8
chr4	99434097	99495849	Itgb3bp
chr19	5447698	5455938	Fosl1
chr17	26275631	26332756	Axin1
chr14	75684173	75744234	Zc3h13
chr2	165609652	165710338	Zmynd8
chr7	87856469	87948217	Iqgap1
chr4	108237472	108251941	Prpf38a
chr7	133690425	133709880	Eif3c
chr11	22872005	22876496	Zrsr1
chr4	118949932	118967118	Ybx1
chr15	34012474	34073291	Mtdh
chr2	32818821	32818938	Snora65
chr16	44139904	44163575	Naa50
chr9	111020615	111128172	Lrrfip2
chr19	38129474	38148915	Cep55

## Sheet: C2C12 YTHDC1-m6A peak
Supplementary Table S2. LACE-seq profiling of YTHDC1 binding in ASC and C2C12 myoblasts.
All YTHDC1 binding peaks overlapping with meRIP-seq peaks in C2C12.
Chromosome	Begin	End	Strand	P-value
chr1	9736760	9736780	+	0.000640612
chr1	20990800	20990820	+	2.08079e-05
chr1	30860540	30860560	+	0.000640612
chr1	30887040	30887060	+	0.000640612
chr1	33859320	33859340	+	0.000218793
chr1	36606140	36606160	+	0.000640612
chr1	36606380	36606420	+	0.000640612
chr1	36606560	36606580	+	0.000640612
chr1	36606800	36606820	+	6.9168e-05
chr1	36606840	36606860	+	0.000640612
chr1	36606900	36606940	+	4.4988e-05
chr1	60543820	60543840	+	6.01748e-06
chr1	60544600	60544620	+	2.08079e-05
chr1	60544780	60544800	+	2.08079e-05
chr1	60544960	60544980	+	0.000640612
chr1	60545720	60545740	+	0.000640612
chr1	60546180	60546200	+	6.9168e-05
chr1	60582740	60582760	+	0.000640612
chr1	64125560	64125580	+	0.000640612
chr1	64125880	64125900	+	2.08079e-05
chr1	64167480	64167500	+	0.000218793
chr1	71644040	71644100	+	2.61879e-06
chr1	71644160	71644180	+	0.000218793
chr1	71644200	71644220	+	6.9168e-05
chr1	71644260	71644300	+	0.00014398
chr1	71644980	71645020	+	0.000320544
chr1	71645920	71645960	+	0.0001198
chr1	71646180	71646200	+	1.29582e-07
chr1	71646220	71646260	+	0.0001198
chr1	71662040	71662060	+	6.9168e-05
chr1	71665160	71665220	+	0.000213739
chr1	71665980	71666020	+	0.000323315
chr1	71666060	71666080	+	6.9168e-05
chr1	71666100	71666120	+	0.000218793
chr1	71667300	71667320	+	0.000218793
chr1	71667340	71667380	+	0.000109401
chr1	71695860	71695880	+	2.08079e-05
chr1	72905000	72905080	+	0.0003428
chr1	72905220	72905260	+	0.000320371
chr1	72905500	72905560	+	0.000359399
chr1	72905600	72905620	+	0.000640612
chr1	72905680	72905700	+	0.000640612
chr1	72905740	72905780	+	4.4988e-05
chr1	72905820	72905860	+	0.00014398
chr1	72905900	72905960	+	0.000259649
chr1	72906000	72906020	+	2.08079e-05
chr1	72906200	72906220	+	0.000640612
chr1	72906240	72906260	+	2.33391e-09
chr1	72906320	72906340	+	2.08079e-05
chr1	72906400	72906420	+	4.76175e-07
chr1	72906440	72906460	+	0.000640612
chr1	72906480	72906520	+	0.000323315
chr1	72906600	72906620	+	6.9168e-05
chr1	72906720	72906760	+	4.4988e-05
chr1	72906840	72906860	+	3.45468e-08
chr1	72906900	72906920	+	4.76175e-07
chr1	72907020	72907080	+	0.000427644
chr1	72907120	72907140	+	0.000640612
chr1	72907380	72907400	+	1.70931e-06
chr1	72907560	72907580	+	9.0622e-09
chr1	72907620	72907660	+	3.54386e-05
chr1	72908380	72908460	+	0.000114607
chr1	72908520	72908580	+	7.35123e-05
chr1	72908860	72908900	+	0.00035489
chr1	72908920	72908940	+	6.01748e-06
chr1	72908960	72909000	+	0.00033071
chr1	72910560	72910580	+	2.08079e-05
chr1	72918660	72918680	+	0.000640612
chr1	73960580	73960600	+	6.01748e-06
chr1	73960700	73960720	+	6.9168e-05
chr1	73960800	73960820	+	0.000218793
chr1	73971640	73971660	+	6.9168e-05
chr1	73999500	73999520	+	1.70931e-06
chr1	74000140	74000160	+	0.000218793
chr1	75473960	75473980	+	0.000218793
chr1	75474040	75474060	+	4.76175e-07
chr1	82230720	82230740	+	0.000218793
chr1	82233820	82233840	+	1.70931e-06
chr1	82233980	82234000	+	4.76175e-07
chr1	82234100	82234120	+	0.000218793
chr1	82261160	82261180	+	2.08079e-05
chr1	82263380	82263400	+	0.000640612
chr1	82283240	82283260	+	0.000640612
chr1	82283480	82283520	+	0.00035489
chr1	82283780	82283800	+	0.000640612
chr1	82283920	82283940	+	0.000218793
chr1	82283960	82283980	+	0.000218793
chr1	82284080	82284100	+	0.000218793
chr1	82284320	82284340	+	2.08079e-05
chr1	82284820	82284840	+	0.000640612
chr1	82284880	82284900	+	0.000218793
chr1	82285940	82285960	+	0.000218793
chr1	82286040	82286100	+	0.000238599
chr1	82286160	82286200	+	0.000109401
chr1	84794140	84794160	+	0.000640612
chr1	84806200	84806220	+	6.9168e-05
chr1	88247160	88247180	+	0.000640612
chr1	88469620	88469640	+	0.000218793
chr1	90161900	90161920	+	0.000640612
chr1	90162200	90162220	+	6.9168e-05
chr1	90162440	90162460	+	2.08079e-05
chr1	90162560	90162580	+	6.01748e-06
chr1	90162740	90162760	+	6.9168e-05
chr1	90162960	90162980	+	2.08079e-05
chr1	90595680	90595700	+	2.08079e-05
chr1	90596820	90596860	+	4.4988e-05
chr1	90596960	90597000	+	0.000429702
chr1	90597180	90597200	+	6.9168e-05
chr1	90597440	90597460	+	0.000218793
chr1	90597820	90597840	+	0.000640612
chr1	92663800	92663860	+	0.000309524
chr1	92663940	92663960	+	1.29582e-07
chr1	92664000	92664020	+	0.000218793
chr1	92664120	92664140	+	6.9168e-05
chr1	92669580	92669600	+	2.08079e-05
chr1	92672160	92672200	+	0.000218793
chr1	92672460	92672500	+	0.00033071
chr1	92672520	92672560	+	1.09274e-06
chr1	92672620	92672640	+	6.9168e-05
chr1	92675360	92675380	+	0.000640612
chr1	92708280	92708300	+	0.000640612
chr1	92709700	92709740	+	3.48221e-05
chr1	92709880	92709900	+	6.9168e-05
chr1	92710060	92710080	+	1.29582e-07
chr1	92710480	92710500	+	2.33391e-09
chr1	92710580	92710620	+	0.000640612
chr1	92710720	92710740	+	4.76175e-07
chr1	92712300	92712320	+	0.000640612
chr1	92712540	92712560	+	6.01748e-06
chr1	92712580	92712600	+	2.08079e-05
chr1	93829240	93829260	+	0.000218793
chr1	95310140	95310160	+	0.000640612
chr1	95318520	95318540	+	0.000218793
chr1	108609620	108609640	+	1.70931e-06
chr1	121964420	121964440	+	0.000640612
chr1	130485540	130485560	+	2.08079e-05
chr1	130485880	130485900	+	2.08079e-05
chr1	134010320	134010340	+	0.000640612
chr1	135521200	135521220	+	0.000640612
chr1	135554620	135554660	+	0.00033071
chr1	135554780	135554800	+	0.000640612
chr1	135554820	135554840	+	0.000218793
chr1	135556100	135556120	+	1.70931e-06
chr1	135556180	135556200	+	1.29582e-07
chr1	135556220	135556240	+	6.9168e-05
chr1	135556300	135556340	+	0.000112405
chr1	135650060	135650080	+	6.01748e-06
chr1	137281820	137281840	+	0.000218793
chr1	137335320	137335340	+	6.9168e-05
chr1	138167380	138167400	+	6.9168e-05
chr1	155068160	155068180	+	2.08079e-05
chr1	155068480	155068500	+	0.000218793
chr1	156945040	156945060	+	1.70931e-06
chr1	156945860	156945880	+	4.76175e-07
chr1	156945900	156945920	+	1.70931e-06
chr1	156945960	156945980	+	6.9168e-05
chr1	156946000	156946020	+	2.08079e-05
chr1	157854100	157854120	+	6.9168e-05
chr1	157854560	157854580	+	2.08079e-05
chr1	164627660	164627680	+	0.000640612
chr1	164627820	164627840	+	2.08079e-05
chr1	164627940	164627980	+	4.4988e-05
chr1	164628060	164628080	+	0.000640612
chr1	164628100	164628120	+	1.70931e-06
chr1	164628160	164628180	+	6.01748e-06
chr1	164634900	164634920	+	6.9168e-05
chr1	164635540	164635560	+	0.000218793
chr1	164636000	164636040	+	2.08079e-05
chr1	164640800	164640820	+	2.08079e-05
chr1	165187560	165187580	+	1.70931e-06
chr1	165187640	165187660	+	2.08079e-05
chr1	165187840	165187900	+	0.000221043
chr1	165192040	165192060	+	2.08079e-05
chr1	165241780	165241800	+	4.76175e-07
chr1	165241880	165241920	+	0.0001198
chr1	165242040	165242060	+	0.000640612
chr1	165242640	165242660	+	0.000640612
chr1	165242820	165242860	+	3.02601e-06
chr1	165242960	165243020	+	0.00042908
chr1	165243160	165243180	+	1.70931e-06
chr1	165243280	165243320	+	0.000323315
chr1	165243420	165243440	+	4.76175e-07
chr1	171907800	171907820	+	0.000640612
chr1	178680120	178680140	+	0.000218793
chr1	178685700	178685720	+	0.000640612
chr1	178685780	178685800	+	6.9168e-05
chr1	179696460	179696480	+	6.9168e-05
chr1	180260340	180260360	+	0.000218793
chr1	183107580	183107620	+	1.70931e-06
chr1	183107740	183107760	+	0.000640612
chr1	183107820	183107840	+	0.000218793
chr1	183107940	183107980	+	0.000429702
chr1	183109540	183109560	+	6.9168e-05
chr1	183851800	183851820	+	0.000640612
chr1	184397880	184397900	+	6.9168e-05
chr1	186551260	186551280	+	0.000218793
chr1	191470760	191470780	+	3.45468e-08
chr1	191480520	191480540	+	2.08079e-05
chr1	194672920	194672940	+	2.08079e-05
chr1	194673020	194673040	+	2.08079e-05
chr10	3158100	3158120	+	0.000640612
chr10	5990580	5990600	+	6.9168e-05
chr10	7525600	7525620	+	2.08079e-05
chr10	7639460	7639480	+	0.000640612
chr10	25174760	25174800	+	0.000320371
chr10	31328420	31328480	+	0.000309524
chr10	31328500	31328520	+	6.9168e-05
chr10	33873480	33873500	+	0.000640612
chr10	36855660	36855680	+	6.9168e-05
chr10	36855920	36855940	+	4.76175e-07
chr10	36856460	36856480	+	0.000640612
chr10	41916140	41916160	+	0.000640612
chr10	44815440	44815480	+	0.00033071
chr10	52062460	52062480	+	0.000640612
chr10	58628080	58628100	+	0.000640612
chr10	59413340	59413380	+	0.000323315
chr10	61732120	61732140	+	0.000640612
chr10	61732180	61732200	+	0.000218793
chr10	61732600	61732620	+	0.000640612
chr10	61755060	61755080	+	0.000218793
chr10	61761900	61761920	+	2.08079e-05
chr10	75322120	75322140	+	2.33391e-09
chr10	76172220	76172240	+	6.01748e-06
chr10	76172360	76172400	+	3.54386e-05
chr10	76559100	76559120	+	0.000640612
chr10	78989860	78989880	+	6.01748e-06
chr10	79221940	79221960	+	6.01748e-06
chr10	79498820	79498840	+	0.000218793
chr10	79843780	79843800	+	6.9168e-05
chr10	79843980	79844000	+	0.000640612
chr10	79844160	79844180	+	0.000640612
chr10	79844560	79844580	+	0.000640612
chr10	79855660	79855680	+	6.9168e-05
chr10	79873040	79873060	+	6.9168e-05
chr10	80011680	80011700	+	0.000640612
chr10	80012340	80012380	+	0.000323315
chr10	80013340	80013360	+	6.9168e-05
chr10	80364820	80364840	+	6.01748e-06
chr10	80507260	80507280	+	0.000640612
chr10	80859280	80859300	+	4.76175e-07
chr10	80861940	80861960	+	2.08079e-05
chr10	80862200	80862240	+	0.000640612
chr10	80862280	80862300	+	0.000218793
chr10	80862400	80862420	+	0.000640612
chr10	80862960	80862980	+	6.9168e-05
chr10	80863200	80863220	+	0.000218793
chr10	80863760	80863800	+	0.00035489
chr10	80864720	80864740	+	6.9168e-05
chr10	80867680	80867720	+	0.00035489
chr10	83989180	83989220	+	0.00033071
chr10	83990080	83990120	+	0.00014398
chr10	83990320	83990340	+	6.01748e-06
chr10	86153740	86153760	+	0.000640612
chr10	86156200	86156220	+	0.000218793
chr10	86158440	86158480	+	0.000218793
chr10	86158580	86158620	+	0.00035489
chr10	86158640	86158660	+	6.9168e-05
chr10	86164660	86164680	+	0.000640612
chr10	90579720	90579740	+	0.000640612
chr10	90616800	90616820	+	2.08079e-05
chr10	90618340	90618360	+	0.000218793
chr10	90619280	90619300	+	0.000218793
chr10	90620420	90620440	+	0.000640612
chr10	90625740	90625760	+	0.000640612
chr10	92712800	92712820	+	1.70931e-06
chr10	92727860	92727880	+	6.9168e-05
chr10	92727980	92728040	+	0.000293404
chr10	94877520	94877540	+	0.000218793
chr10	112364760	112364780	+	0.000218793
chr10	114727800	114727820	+	2.08079e-05
chr10	116511520	116511540	+	6.9168e-05
chr10	116652600	116652620	+	0.000640612
chr10	117127420	117127440	+	0.000640612
chr10	118296880	118296900	+	4.76175e-07
chr10	118297060	118297100	+	1.04212e-05
chr10	118297200	118297220	+	0.000640612
chr10	118648200	118648220	+	6.9168e-05
chr10	118648480	118648520	+	0.00033071
chr10	118648660	118648680	+	0.000640612
chr10	119818680	119818700	+	0.000640612
chr10	119825420	119825440	+	2.08079e-05
chr10	119834960	119834980	+	2.08079e-05
chr10	119837580	119837600	+	0.000218793
chr10	119857540	119857560	+	4.76175e-07
chr10	119857960	119857980	+	6.01748e-06
chr10	119858100	119858120	+	0.000218793
chr10	119859120	119859140	+	6.9168e-05
chr10	119861220	119861240	+	6.9168e-05
chr10	119862320	119862340	+	6.9168e-05
chr10	119863200	119863240	+	0.00035489
chr10	119863260	119863300	+	0.000429702
chr10	119864280	119864320	+	0.000112405
chr10	119866020	119866040	+	2.08079e-05
chr10	119866480	119866500	+	0.000640612
chr10	119866520	119866540	+	1.29582e-07
chr10	119866560	119866580	+	0.000640612
chr10	119869100	119869120	+	6.01748e-06
chr10	119870080	119870100	+	6.01748e-06
chr10	119872160	119872180	+	6.01748e-06
chr10	119875260	119875300	+	0.000429702
chr10	119878940	119878960	+	0.000218793
chr10	119879640	119879660	+	0.000640612
chr10	119882900	119882920	+	6.01748e-06
chr10	119887420	119887440	+	0.000640612
chr10	119887720	119887740	+	0.000218793
chr10	119888100	119888120	+	6.9168e-05
chr10	119888220	119888240	+	0.000218793
chr10	119892660	119892680	+	0.000640612
chr10	119895260	119895280	+	0.000640612
chr10	119897000	119897020	+	0.000218793
chr10	119898080	119898100	+	0.000640612
chr10	119898920	119898940	+	2.08079e-05
chr10	119898980	119899000	+	0.000218793
chr10	119899040	119899060	+	1.29582e-07
chr10	119899160	119899180	+	0.000218793
chr10	119910120	119910140	+	0.000640612
chr10	119911020	119911040	+	0.000218793
chr10	119911960	119911980	+	0.000218793
chr10	119912440	119912480	+	0.000429702
chr10	119912740	119912760	+	0.000640612
chr10	119912860	119912880	+	0.000218793
chr10	119912940	119912960	+	6.9168e-05
chr10	119913020	119913060	+	0.000429702
chr10	119913220	119913240	+	6.01748e-06
chr10	126504440	126504460	+	0.000218793
chr10	126911980	126912000	+	0.000640612
chr10	126975360	126975380	+	0.000218793
chr10	126978840	126978860	+	6.01748e-06
chr10	126979640	126979660	+	1.70931e-06
chr10	126980280	126980300	+	1.70931e-06
chr10	126981480	126981500	+	0.000640612
chr10	126981520	126981540	+	1.29582e-07
chr10	127098060	127098080	+	0.000218793
chr10	127101900	127101920	+	0.000218793
chr10	127102100	127102120	+	2.08079e-05
chr10	127927940	127927980	+	0.000429702
chr10	127928000	127928060	+	0.000640612
chr10	127985220	127985260	+	0.000429702
chr10	127985280	127985360	+	0.00022048
chr10	127985380	127985420	+	0.000320323
chr10	128116380	128116400	+	0.000640612
chr11	3813300	3813320	+	0.000640612
chr11	4387380	4387460	+	0.000392296
chr11	4961160	4961180	+	6.9168e-05
chr11	4980280	4980300	+	0.000640612
chr11	4981540	4981560	+	6.9168e-05
chr11	4985900	4985920	+	6.9168e-05
chr11	5092360	5092400	+	0.00014398
chr11	5092660	5092680	+	2.08079e-05
chr11	5092920	5092940	+	0.000640612
chr11	5093080	5093100	+	0.000640612
chr11	5093580	5093600	+	6.9168e-05
chr11	5093620	5093640	+	6.9168e-05
chr11	5094760	5094780	+	0.000640612
chr11	6373440	6373460	+	6.9168e-05
chr11	6373900	6373920	+	1.70931e-06
chr11	6374200	6374220	+	1.29582e-07
chr11	6374460	6374480	+	1.70931e-06
chr11	6374820	6374840	+	0.000218793
chr11	6374880	6374900	+	6.01748e-06
chr11	6375080	6375100	+	2.08079e-05
chr11	6375300	6375320	+	0.000640612
chr11	6375400	6375420	+	6.9168e-05
chr11	8333620	8333640	+	0.000218793
chr11	8333720	8333740	+	1.70931e-06
chr11	22736240	22736280	+	3.75927e-05
chr11	30017740	30017760	+	1.70931e-06
chr11	30021020	30021040	+	6.9168e-05
chr11	30035940	30035960	+	0.000640612
chr11	30036920	30036940	+	6.9168e-05
chr11	30037120	30037140	+	6.9168e-05
chr11	30037200	30037240	+	0.00014398
chr11	30038440	30038460	+	0.000640612
chr11	30038660	30038680	+	2.08079e-05
chr11	30038820	30038840	+	1.70931e-06
chr11	30039040	30039060	+	0.000640612
chr11	30039400	30039420	+	0.000640612
chr11	33060340	33060360	+	2.08079e-05
chr11	48629620	48629640	+	0.000218793
chr11	48630120	48630140	+	4.76175e-07
chr11	50071960	50071980	+	0.000640612
chr11	50077560	50077580	+	0.000640612
chr11	50109720	50109740	+	1.70931e-06
chr11	53075140	53075160	+	6.9168e-05
chr11	54792860	54792880	+	1.70931e-06
chr11	54792900	54792920	+	0.000640612
chr11	54808000	54808020	+	0.000640612
chr11	54821360	54821380	+	0.000218793
chr11	55208120	55208140	+	0.000218793
chr11	55212740	55212800	+	7.55066e-05
chr11	55215500	55215540	+	0.000109461
chr11	55218060	55218080	+	6.9168e-05
chr11	61359720	61359740	+	6.9168e-05
chr11	61359940	61359960	+	4.76175e-07
chr11	61359980	61360000	+	6.9168e-05
chr11	69157740	69157760	+	6.9168e-05
chr11	69174600	69174620	+	2.08079e-05
chr11	69218520	69218540	+	0.000640612
chr11	69219080	69219120	+	0.00035489
chr11	69547920	69547940	+	0.000640612
chr11	69549240	69549260	+	6.9168e-05
chr11	69638440	69638460	+	6.01748e-06
chr11	69639140	69639160	+	1.29582e-07
chr11	69639180	69639220	+	0.000323315
chr11	69639260	69639280	+	1.70931e-06
chr11	69639380	69639420	+	0.00033071
chr11	69693040	69693080	+	0.00014398
chr11	69693540	69693580	+	8.54949e-07
chr11	69730260	69730280	+	0.000640612
chr11	69730380	69730400	+	6.01748e-06
chr11	69730620	69730640	+	6.9168e-05
chr11	69824200	69824220	+	0.000218793
chr11	70458020	70458040	+	0.000218793
chr11	70458060	70458080	+	0.000640612
chr11	70458180	70458200	+	0.000218793
chr11	70465580	70465640	+	0.000221043
chr11	70723020	70723040	+	0.000640612
chr11	74522280	74522300	+	0.000218793
chr11	74527480	74527500	+	0.000218793
chr11	74534280	74534300	+	0.000640612
chr11	74991320	74991340	+	0.000640612
chr11	75265840	75265860	+	0.000640612
chr11	75413400	75413420	+	1.29582e-07
chr11	76232340	76232360	+	6.9168e-05
chr11	77351740	77351760	+	0.000218793
chr11	77501380	77501400	+	0.000218793
chr11	77540460	77540480	+	6.9168e-05
chr11	77553000	77553040	+	0.0001198
chr11	77973200	77973220	+	0.000218793
chr11	77995200	77995240	+	0.000429702
chr11	83254900	83254920	+	0.000640612
chr11	87794720	87794740	+	0.000640612
chr11	88785460	88785480	+	0.000218793
chr11	94906880	94906900	+	0.000640612
chr11	94907860	94907880	+	0.000640612
chr11	96679780	96679800	+	6.9168e-05
chr11	96679940	96679960	+	2.08079e-05
chr11	96680220	96680240	+	4.76175e-07
chr11	96680660	96680680	+	0.000640612
chr11	96680800	96680820	+	0.000640612
chr11	96680840	96680860	+	0.000640612
chr11	96681140	96681160	+	6.01748e-06
chr11	96681200	96681240	+	0.0001198
chr11	96681280	96681360	+	0.000166892
chr11	96681560	96681620	+	0.000221043
chr11	96681680	96681700	+	0.000218793
chr11	96685600	96685620	+	0.000218793
chr11	96685940	96685960	+	6.01748e-06
chr11	96687380	96687400	+	6.9168e-05
chr11	96688840	96688880	+	0.000320544
chr11	96689160	96689180	+	4.76175e-07
chr11	96689340	96689360	+	6.9168e-05
chr11	97023740	97023760	+	0.000218793
chr11	97043000	97043020	+	0.000640612
chr11	97551380	97551400	+	0.000640612
chr11	97578580	97578600	+	0.000218793
chr11	97904940	97904960	+	6.01748e-06
chr11	97905900	97905920	+	0.000640612
chr11	97914480	97914500	+	0.000640612
chr11	98016600	98016620	+	6.9168e-05
chr11	98019360	98019380	+	0.000218793
chr11	98680840	98680860	+	0.000640612
chr11	98691740	98691760	+	0.000640612
chr11	98855600	98855640	+	0.000218793
chr11	98862360	98862380	+	2.08079e-05
chr11	99080120	99080140	+	0.000640612
chr11	100818200	100818220	+	0.000218793
chr11	100818360	100818380	+	6.01748e-06
chr11	100819480	100819540	+	0.00043401
chr11	100819560	100819580	+	0.000640612
chr11	100819620	100819640	+	6.01748e-06
chr11	100819840	100819860	+	0.000218793
chr11	100831560	100831580	+	2.08079e-05
chr11	101321380	101321400	+	6.9168e-05
chr11	101321420	101321440	+	2.08079e-05
chr11	102167640	102167660	+	0.000640612
chr11	102339700	102339720	+	2.08079e-05
chr11	102343260	102343280	+	0.000640612
chr11	102661740	102661760	+	0.000640612
chr11	102662240	102662260	+	0.000218793
chr11	102978300	102978320	+	0.000218793
chr11	102978380	102978400	+	2.08079e-05
chr11	102978640	102978660	+	4.76175e-07
chr11	102979100	102979120	+	0.000640612
chr11	104285420	104285440	+	2.08079e-05
chr11	104285780	104285800	+	0.000640612
chr11	106643160	106643240	+	0.000221558
chr11	106643820	106643860	+	2.08079e-05
chr11	106935540	106935560	+	1.70931e-06
chr11	106935680	106935700	+	0.000218793
chr11	106972680	106972700	+	6.01748e-06
chr11	106992840	106992860	+	0.000218793
chr11	113590240	113590260	+	0.000640612
chr11	115505580	115505600	+	0.000218793
chr11	116029360	116029380	+	6.9168e-05
chr11	116029400	116029440	+	0.00035489
chr11	116135300	116135320	+	2.08079e-05
chr11	116673360	116673380	+	1.70931e-06
chr11	116676380	116676400	+	0.000218793
chr11	116699740	116699760	+	0.000218793
chr11	117682360	117682380	+	0.000640612
chr11	117683420	117683440	+	0.000640612
chr11	118163340	118163380	+	3.46488e-05
chr11	118164920	118164940	+	1.70931e-06
chr11	118171940	118171960	+	6.01748e-06
chr11	118178760	118178780	+	6.9168e-05
chr11	118192540	118192560	+	2.08079e-05
chr11	118193840	118193860	+	0.000640612
chr11	118193920	118193940	+	0.000218793
chr11	118194620	118194640	+	2.08079e-05
chr11	118195280	118195300	+	0.000640612
chr11	118195700	118195720	+	6.9168e-05
chr11	118196040	118196060	+	0.000640612
chr11	118196720	118196740	+	4.76175e-07
chr11	118196800	118196820	+	0.000640612
chr11	118196920	118196940	+	4.76175e-07
chr11	118196960	118196980	+	6.01748e-06
chr11	118197040	118197080	+	0.000323315
chr11	118197100	118197120	+	1.70931e-06
chr11	118197180	118197220	+	0.000320544
chr11	118216300	118216320	+	6.9168e-05
chr11	118216500	118216540	+	0.000109635
chr11	119966560	119966580	+	0.000640612
chr11	120422320	120422340	+	1.70931e-06
chr11	120422400	120422420	+	1.29582e-07
chr11	120424520	120424540	+	6.9168e-05
chr11	120424960	120424980	+	6.9168e-05
chr11	120429520	120429540	+	6.9168e-05
chr11	120432980	120433000	+	0.000640612
chr11	120439480	120439520	+	3.86339e-06
chr11	120439580	120439600	+	6.01748e-06
chr11	120439620	120439640	+	4.76175e-07
chr11	120440260	120440300	+	3.46013e-05
chr11	120440460	120440480	+	0.000218793
chr11	120825000	120825040	+	4.4988e-05
chr12	8504900	8504960	+	8.98499e-06
chr12	8505060	8505080	+	0.000218793
chr12	8505180	8505240	+	8.00257e-05
chr12	8505420	8505500	+	0.000182656
chr12	8505640	8505680	+	0.00035489
chr12	8505820	8505880	+	0.000243529
chr12	8505920	8505960	+	4.4988e-05
chr12	8506100	8506140	+	4.4988e-05
chr12	8506180	8506220	+	0.000112405
chr12	8506320	8506340	+	0.000640612
chr12	8506360	8506380	+	0.000218793
chr12	8506520	8506540	+	0.000640612
chr12	21330040	21330060	+	6.9168e-05
chr12	28026040	28026060	+	0.000218793
chr12	28026320	28026340	+	0.000640612
chr12	28026360	28026400	+	3.75927e-05
chr12	28026600	28026620	+	6.01748e-06
chr12	52765960	52765980	+	0.000640612
chr12	52776780	52776800	+	0.000218793
chr12	71085200	71085220	+	0.000640612
chr12	71085540	71085580	+	0.000110251
chr12	74144160	74144200	+	0.0001198
chr12	74144220	74144240	+	6.9168e-05
chr12	74144320	74144340	+	0.000640612
chr12	74144540	74144580	+	0.000429702
chr12	74144600	74144620	+	2.08079e-05
chr12	74144960	74144980	+	0.000640612
chr12	74145360	74145380	+	6.01748e-06
chr12	74146020	74146040	+	0.000218793
chr12	74146160	74146180	+	0.000218793
chr12	74146440	74146460	+	0.000218793
chr12	74146540	74146560	+	0.000640612
chr12	74204380	74204400	+	2.08079e-05
chr12	74204480	74204520	+	0.00035489
chr12	74204840	74204860	+	3.45468e-08
chr12	74209860	74209880	+	0.000218793
chr12	74213860	74213900	+	3.75927e-05
chr12	78039160	78039200	+	0.000640612
chr12	78039360	78039380	+	0.000640612
chr12	81210800	81210820	+	6.9168e-05
chr12	81210860	81210880	+	1.29582e-07
chr12	81210940	81210960	+	1.29582e-07
chr12	81211060	81211080	+	6.9168e-05
chr12	81211100	81211120	+	1.70931e-06
chr12	81211220	81211240	+	6.01748e-06
chr12	81269300	81269320	+	0.000640612
chr12	81293340	81293360	+	0.000640612
chr12	81310360	81310380	+	0.000640612
chr12	81337580	81337600	+	0.000640612
chr12	81341640	81341660	+	0.000218793
chr12	81348260	81348280	+	0.000640612
chr12	81348460	81348480	+	0.000640612
chr12	81351660	81351680	+	0.000640612
chr12	81361060	81361080	+	2.08079e-05
chr12	81361120	81361160	+	0.000320323
chr12	81438100	81438120	+	0.000218793
chr12	85514100	85514120	+	2.08079e-05
chr12	86507600	86507640	+	0.000640612
chr12	86684300	86684320	+	6.01748e-06
chr12	87418780	87418820	+	0.000429702
chr12	87419180	87419200	+	2.08079e-05
chr12	87419300	87419320	+	0.000640612
chr12	88222420	88222440	+	1.70931e-06
chr12	88222600	88222620	+	0.000640612
chr12	88222700	88222720	+	0.000640612
chr12	88222760	88222780	+	6.9168e-05
chr12	88223000	88223060	+	0.00043401
chr12	88223280	88223300	+	6.9168e-05
chr12	88223600	88223620	+	0.000218793
chr12	88223680	88223700	+	0.000640612
chr12	88223820	88223840	+	0.000218793
chr12	88224120	88224160	+	0.000323315
chr12	88225140	88225160	+	4.76175e-07
chr12	88580460	88580480	+	2.08079e-05
chr12	88693540	88693560	+	0.000640612
chr12	99927440	99927460	+	2.08079e-05
chr12	100626700	100626720	+	0.000218793
chr12	104105200	104105240	+	0.000218793
chr12	104105380	104105420	+	0.000429702
chr12	106168760	106168780	+	0.000640612
chr12	106169480	106169500	+	0.000218793
chr12	111931020	111931040	+	0.000218793
chr12	112214780	112214800	+	0.000640612
chr12	112948340	112948360	+	0.000218793
chr12	113892920	113892940	+	0.000218793
chr12	114011420	114011440	+	4.76175e-07
chr12	114059660	114059680	+	1.70931e-06
chr12	114216000	114216040	+	0.000429702
chr12	114216580	114216600	+	1.70931e-06
chr13	17864640	17864660	+	0.000218793
chr13	17879660	17879680	+	0.000218793
chr13	17887580	17887600	+	0.000640612
chr13	17895620	17895640	+	0.000218793
chr13	23448960	23448980	+	0.000218793
chr13	23714040	23714060	+	0.000218793
chr13	29042120	29042140	+	6.01748e-06
chr13	29042280	29042300	+	0.000218793
chr13	29042740	29042760	+	0.000218793
chr13	29043020	29043040	+	6.01748e-06
chr13	29043100	29043120	+	2.08079e-05
chr13	29043320	29043340	+	6.9168e-05
chr13	29043800	29043840	+	4.4988e-05
chr13	29043860	29043900	+	0.000429702
chr13	29043920	29043940	+	2.08079e-05
chr13	29043960	29043980	+	2.08079e-05
chr13	29044260	29044280	+	6.01748e-06
chr13	29045080	29045100	+	0.000640612
chr13	30001800	30001820	+	2.08079e-05
chr13	34009860	34009880	+	1.29582e-07
chr13	34009980	34010000	+	0.000640612
chr13	34010140	34010180	+	4.4988e-05
chr13	34166280	34166300	+	2.08079e-05
chr13	34166380	34166400	+	1.70931e-06
chr13	34166580	34166620	+	0.000323315
chr13	34166960	34166980	+	0.000640612
chr13	34167140	34167160	+	1.29582e-07
chr13	34219380	34219400	+	3.45468e-08
chr13	34219460	34219480	+	1.29582e-07
chr13	34219960	34219980	+	0.000640612
chr13	34220140	34220180	+	0.000109635
chr13	34220800	34220820	+	6.01748e-06
chr13	34720380	34720400	+	6.9168e-05
chr13	38593220	38593240	+	2.08079e-05
chr13	38593400	38593420	+	6.9168e-05
chr13	41405860	41405880	+	2.08079e-05
chr13	41407020	41407040	+	6.9168e-05
chr13	45065120	45065140	+	0.000640612
chr13	45652580	45652600	+	0.000640612
chr13	45652800	45652820	+	0.000218793
chr13	58228600	58228620	+	0.000218793
chr13	58228660	58228680	+	6.9168e-05
chr13	58228840	58228860	+	0.000218793
chr13	58229160	58229180	+	1.29582e-07
chr13	58229460	58229520	+	0.000238599
chr13	59901440	59901460	+	6.9168e-05
chr13	60276900	60276940	+	6.01748e-06
chr13	60276980	60277100	+	0.000191514
chr13	60277120	60277140	+	6.01748e-06
chr13	60277160	60277200	+	3.54386e-05
chr13	60277300	60277320	+	0.000218793
chr13	60277340	60277360	+	6.9168e-05
chr13	60277400	60277420	+	0.000218793
chr13	60277440	60277460	+	0.000640612
chr13	60277500	60277520	+	6.9168e-05
chr13	60277560	60277600	+	0.000429702
chr13	60277720	60277740	+	1.70931e-06
chr13	60277860	60277900	+	0.000112405
chr13	60278020	60278080	+	0.000309524
chr13	60278100	60278120	+	6.9168e-05
chr13	60278140	60278160	+	3.45468e-08
chr13	60278220	60278240	+	0.000640612
chr13	60278280	60278320	+	0.00035489
chr13	60278340	60278380	+	6.9168e-05
chr13	60278460	60278480	+	4.76175e-07
chr13	60278540	60278580	+	0.000429702
chr13	64468340	64468360	+	0.000640612
chr13	70741740	70741760	+	1.29582e-07
chr13	70743120	70743140	+	0.000218793
chr13	74905600	74905620	+	0.000640612
chr13	89796760	89796780	+	2.33391e-09
chr13	89828120	89828140	+	2.08079e-05
chr13	89828180	89828220	+	0.000640612
chr13	89828600	89828640	+	0.00035489
chr13	89828700	89828720	+	2.08079e-05
chr13	89829020	89829040	+	0.000640612
chr13	89829060	89829100	+	0.00014398
chr13	89829180	89829200	+	1.29582e-07
chr13	89829620	89829640	+	0.000218793
chr13	89830100	89830120	+	0.000640612
chr13	89832760	89832780	+	0.000218793
chr13	89832820	89832840	+	0.000218793
chr13	95288160	95288180	+	0.000640612
chr13	96372760	96372780	+	6.9168e-05
chr13	96373740	96373760	+	6.9168e-05
chr13	98530360	98530380	+	0.000218793
chr13	98530420	98530460	+	3.75927e-05
chr13	100191760	100191780	+	0.000640612
chr13	100191960	100191980	+	1.29582e-07
chr13	100195460	100195520	+	7.35123e-05
chr13	100195760	100195780	+	6.9168e-05
chr13	100195900	100195920	+	0.000218793
chr13	100196320	100196340	+	6.9168e-05
chr13	100196680	100196700	+	6.9168e-05
chr13	100196740	100196760	+	0.000640612
chr13	100197180	100197220	+	0.000110251
chr13	100199180	100199200	+	0.000640612
chr13	100200520	100200540	+	2.08079e-05
chr13	100200660	100200680	+	2.33391e-09
chr13	100200720	100200740	+	0.000640612
chr13	100200920	100200940	+	6.9168e-05
chr13	100202380	100202400	+	6.01748e-06
chr13	100202500	100202520	+	0.000218793
chr13	100202820	100202840	+	0.000218793
chr13	100202860	100202880	+	6.9168e-05
chr13	100202940	100202960	+	0.000640612
chr13	100203900	100203920	+	2.08079e-05
chr13	102454320	102454340	+	0.000218793
chr13	102527760	102527780	+	6.01748e-06
chr13	103526060	103526080	+	4.76175e-07
chr13	103526620	103526640	+	0.000218793
chr13	103528720	103528740	+	6.9168e-05
chr13	104533600	104533620	+	0.000218793
chr13	104623760	104623780	+	2.08079e-05
chr13	104624140	104624160	+	2.08079e-05
chr13	114384940	114384960	+	0.000218793
chr13	114403060	114403080	+	0.000218793
chr14	21549000	21549020	+	0.000640612
chr14	21554460	21554500	+	0.00035489
chr14	21555580	21555600	+	0.000640612
chr14	21555880	21555900	+	6.9168e-05
chr14	21555920	21555940	+	0.000640612
chr14	21556280	21556300	+	0.000640612
chr14	21570500	21570520	+	0.000640612
chr14	22804140	22804160	+	0.000640612
chr14	22804540	22804560	+	6.01748e-06
chr14	24977700	24977740	+	3.48221e-05
chr14	26533720	26533740	+	1.70931e-06
chr14	26534040	26534080	+	0.000640612
chr14	26534260	26534280	+	0.000640612
chr14	26534360	26534380	+	6.01748e-06
chr14	26534460	26534480	+	6.9168e-05
chr14	27353320	27353340	+	0.000218793
chr14	31984820	31984840	+	0.000640612
chr14	31985660	31985700	+	0.000323315
chr14	31985740	31985760	+	0.000640612
chr14	31986260	31986300	+	0.000429702
chr14	31987460	31987480	+	6.01748e-06
chr14	31987500	31987520	+	2.08079e-05
chr14	31987820	31987840	+	0.000640612
chr14	31987880	31987900	+	1.70931e-06
chr14	31989660	31989680	+	1.70931e-06
chr14	31989700	31989720	+	6.9168e-05
chr14	31989760	31989800	+	0.000112405
chr14	31990080	31990100	+	0.000640612
chr14	31994020	31994080	+	0.000286627
chr14	31996320	31996340	+	0.000218793
chr14	31996560	31996580	+	0.000218793
chr14	31996940	31996960	+	2.08079e-05
chr14	31998120	31998140	+	0.000218793
chr14	31998660	31998680	+	0.000640612
chr14	31999100	31999120	+	0.000218793
chr14	31999180	31999200	+	6.9168e-05
chr14	31999260	31999280	+	2.08079e-05
chr14	37692580	37692600	+	0.000640612
chr14	52780860	52780880	+	6.9168e-05
chr14	52824500	52824520	+	6.9168e-05
chr14	55126080	55126100	+	6.9168e-05
chr14	55265280	55265300	+	0.000640612
chr14	55266940	55266960	+	0.000218793
chr14	55267640	55267660	+	6.01748e-06
chr14	55268060	55268100	+	3.54386e-05
chr14	55268520	55268540	+	4.76175e-07
chr14	55268600	55268620	+	0.000218793
chr14	55268760	55268800	+	0.00033071
chr14	55268880	55268920	+	0.000218793
chr14	55269100	55269120	+	1.29582e-07
chr14	55269160	55269180	+	0.000218793
chr14	55269240	55269280	+	3.46488e-05
chr14	55269380	55269400	+	6.01748e-06
chr14	55269420	55269440	+	1.29582e-07
chr14	55269600	55269680	+	0.00022048
chr14	55269720	55269740	+	2.08079e-05
chr14	55269900	55269920	+	0.000218793
chr14	55272400	55272420	+	2.08079e-05
chr14	56244780	56244800	+	0.000218793
chr14	56290640	56290660	+	0.000640612
chr14	58309960	58309980	+	0.000640612
chr14	67423940	67423960	+	6.9168e-05
chr14	67634880	67634900	+	0.000640612
chr14	68374280	68374300	+	0.000640612
chr14	69861640	69861720	+	0.000269977
chr14	69863040	69863060	+	6.9168e-05
chr14	69863200	69863280	+	0.000338025
chr14	69863320	69863340	+	4.76175e-07
chr14	70564380	70564400	+	0.000218793
chr14	70564440	70564460	+	6.9168e-05
chr14	75735900	75735920	+	2.08079e-05
chr14	77484060	77484080	+	1.70931e-06
chr14	106292080	106292100	+	0.000640612
chr14	106292220	106292240	+	4.76175e-07
chr14	106292520	106292540	+	1.29582e-07
chr14	106292560	106292580	+	0.000218793
chr14	106292740	106292760	+	0.000218793
chr14	106292840	106292860	+	6.9168e-05
chr14	106292900	106292920	+	0.000640612
chr14	106295160	106295180	+	6.9168e-05
chr14	106295720	106295760	+	0.00035489
chr15	3270320	3270340	+	0.000218793
chr15	10388100	10388120	+	0.000218793
chr15	10504020	10504040	+	0.000640612
chr15	25293880	25293900	+	6.9168e-05
chr15	25316780	25316800	+	0.000218793
chr15	25332060	25332080	+	2.08079e-05
chr15	25342440	25342460	+	1.29582e-07
chr15	27661720	27661740	+	0.000640612
chr15	36525680	36525700	+	0.000640612
chr15	36526720	36526740	+	6.01748e-06
chr15	36526800	36526820	+	6.01748e-06
chr15	36527800	36527840	+	0.000429702
chr15	36527980	36528060	+	0.000324248
chr15	36528980	36529020	+	1.04688e-05
chr15	36538200	36538220	+	6.9168e-05
chr15	36538240	36538260	+	6.9168e-05
chr15	36538400	36538460	+	0.000259649
chr15	36538500	36538520	+	2.08079e-05
chr15	36700780	36700800	+	0.000640612
chr15	36710460	36710480	+	6.01748e-06
chr15	36713320	36713340	+	6.9168e-05
chr15	36716080	36716100	+	0.000640612
chr15	36720540	36720560	+	0.000218793
chr15	36723240	36723260	+	2.08079e-05
chr15	38225640	38225680	+	0.00014398
chr15	39710120	39710140	+	0.000640612
chr15	50492300	50492320	+	0.000218793
chr15	52899920	52899960	+	0.00035489
chr15	52900140	52900160	+	0.000640612
chr15	52900280	52900320	+	6.9168e-05
chr15	52969480	52969500	+	0.000218793
chr15	52976520	52976540	+	6.01748e-06
chr15	52979140	52979160	+	0.000640612
chr15	52988160	52988180	+	0.000640612
chr15	52995340	52995360	+	0.000640612
chr15	52995400	52995420	+	0.000640612
chr15	52999760	52999780	+	0.000218793
chr15	53005540	53005560	+	6.9168e-05
chr15	53017040	53017060	+	0.000640612
chr15	53017820	53017840	+	1.70931e-06
chr15	53020740	53020760	+	0.000640612
chr15	53023000	53023020	+	2.08079e-05
chr15	53028740	53028760	+	0.000640612
chr15	53031920	53031940	+	1.70931e-06
chr15	53032240	53032280	+	0.00014398
chr15	53035400	53035420	+	6.9168e-05
chr15	53036580	53036620	+	0.000640612
chr15	53037140	53037160	+	1.29582e-07
chr15	53039420	53039440	+	6.9168e-05
chr15	53039520	53039540	+	0.000640612
chr15	53039820	53039840	+	0.000640612
chr15	53043500	53043540	+	3.46488e-05
chr15	53045860	53045880	+	0.000640612
chr15	53047640	53047660	+	1.70931e-06
chr15	53048180	53048200	+	2.08079e-05
chr15	53053800	53053840	+	2.08079e-05
chr15	53054180	53054200	+	1.70931e-06
chr15	53056340	53056360	+	2.08079e-05
chr15	53056660	53056680	+	0.000640612
chr15	53058280	53058300	+	0.000218793
chr15	53058620	53058640	+	1.70931e-06
chr15	53058700	53058720	+	0.000640612
chr15	53058920	53058960	+	0.000109635
chr15	53060620	53060640	+	0.000218793
chr15	53061000	53061020	+	6.9168e-05
chr15	53062740	53062760	+	0.000218793
chr15	53064260	53064280	+	0.000218793
chr15	53066120	53066140	+	0.000218793
chr15	53066740	53066760	+	0.000640612
chr15	53066900	53066920	+	6.01748e-06
chr15	53071660	53071680	+	6.9168e-05
chr15	53073100	53073140	+	0.00033071
chr15	53073460	53073500	+	0.00033071
chr15	53074080	53074100	+	0.000640612
chr15	53074380	53074400	+	1.70931e-06
chr15	53074500	53074540	+	0.00033071
chr15	53074760	53074780	+	0.000218793
chr15	53074960	53074980	+	0.000218793
chr15	53075180	53075200	+	0.000640612
chr15	53075780	53075800	+	0.000218793
chr15	53076380	53076400	+	6.01748e-06
chr15	53076880	53076900	+	0.000218793
chr15	53078320	53078340	+	6.9168e-05
chr15	53079160	53079180	+	1.70931e-06
chr15	53081300	53081320	+	6.9168e-05
chr15	53082240	53082260	+	0.000640612
chr15	53084620	53084640	+	0.000218793
chr15	53086480	53086500	+	1.70931e-06
chr15	53086560	53086580	+	0.000640612
chr15	53087500	53087540	+	3.75927e-05
chr15	53087760	53087780	+	0.000640612
chr15	53088580	53088640	+	0.00043401
chr15	53088700	53088740	+	0.00033071
chr15	53089980	53090020	+	0.00035489
chr15	53090580	53090600	+	0.000218793
chr15	53090620	53090660	+	0.00035489
chr15	53090780	53090800	+	0.000218793
chr15	53091440	53091460	+	6.9168e-05
chr15	53092000	53092020	+	6.01748e-06
chr15	53092040	53092060	+	0.000640612
chr15	53093760	53093780	+	2.08079e-05
chr15	53093820	53093840	+	1.70931e-06
chr15	53094880	53094900	+	0.000640612
chr15	53095700	53095720	+	0.000218793
chr15	53096120	53096140	+	0.000218793
chr15	53096380	53096420	+	0.000429702
chr15	53096560	53096580	+	0.000640612
chr15	53096800	53096840	+	0.000429702
chr15	53097500	53097520	+	0.000218793
chr15	53098120	53098160	+	1.34127e-05
chr15	53098560	53098600	+	0.000112405
chr15	53099400	53099420	+	6.9168e-05
chr15	53099480	53099500	+	6.9168e-05
chr15	53100940	53100960	+	6.9168e-05
chr15	53103980	53104000	+	6.9168e-05
chr15	53104480	53104500	+	0.000218793
chr15	53105080	53105100	+	0.000640612
chr15	53105220	53105240	+	6.01748e-06
chr15	53106060	53106080	+	2.08079e-05
chr15	53106180	53106200	+	0.000218793
chr15	53107180	53107200	+	0.000640612
chr15	53109880	53109900	+	2.08079e-05
chr15	53111920	53111960	+	0.000429702
chr15	53112920	53112940	+	0.000218793
chr15	53114760	53114780	+	0.000640612
chr15	53115420	53115440	+	0.000640612
chr15	53115980	53116000	+	0.000640612
chr15	53117420	53117440	+	0.000218793
chr15	53118320	53118360	+	0.000429702
chr15	53118380	53118400	+	0.000218793
chr15	53118420	53118440	+	0.000218793
chr15	53120680	53120700	+	0.000218793
chr15	53121140	53121160	+	0.000218793
chr15	53121420	53121440	+	1.29582e-07
chr15	53122000	53122020	+	0.000640612
chr15	53122320	53122340	+	0.000218793
chr15	53122540	53122560	+	0.000218793
chr15	53122660	53122680	+	6.01748e-06
chr15	53123140	53123160	+	0.000218793
chr15	53126520	53126540	+	2.08079e-05
chr15	53127380	53127400	+	0.000640612
chr15	53127480	53127500	+	0.000640612
chr15	53127840	53127860	+	1.70931e-06
chr15	53128120	53128140	+	0.000218793
chr15	53129180	53129200	+	0.000640612
chr15	53129360	53129380	+	0.000640612
chr15	53130360	53130380	+	0.000640612
chr15	53132480	53132500	+	0.000640612
chr15	53132880	53132900	+	6.01748e-06
chr15	53133060	53133080	+	0.000640612
chr15	53133160	53133180	+	1.70931e-06
chr15	53133240	53133280	+	3.75927e-05
chr15	53134660	53134720	+	0.000243529
chr15	53135340	53135360	+	0.000640612
chr15	53135680	53135700	+	0.000640612
chr15	53136700	53136720	+	0.000640612
chr15	53137820	53137840	+	0.000218793
chr15	53139280	53139300	+	0.000640612
chr15	53139800	53139820	+	6.01748e-06
chr15	53140760	53140780	+	0.000218793
chr15	53141060	53141080	+	0.000218793
chr15	53141640	53141660	+	2.08079e-05
chr15	53141720	53141740	+	0.000640612
chr15	53141760	53141780	+	6.9168e-05
chr15	53142180	53142200	+	6.9168e-05
chr15	53142420	53142440	+	4.76175e-07
chr15	53142600	53142640	+	0.000429702
chr15	53142700	53142720	+	6.9168e-05
chr15	53143000	53143020	+	3.45468e-08
chr15	53143540	53143560	+	2.08079e-05
chr15	53143700	53143720	+	0.000640612
chr15	53146160	53146180	+	1.70931e-06
chr15	53148020	53148040	+	2.08079e-05
chr15	53148420	53148440	+	6.9168e-05
chr15	53148620	53148640	+	0.000640612
chr15	53148700	53148760	+	0.000309524
chr15	53151480	53151520	+	6.9168e-05
chr15	53152440	53152460	+	0.000640612
chr15	53153260	53153280	+	4.76175e-07
chr15	53153440	53153460	+	2.08079e-05
chr15	53153700	53153720	+	0.000640612
chr15	53154580	53154600	+	0.000218793
chr15	53156180	53156200	+	0.000640612
chr15	53158340	53158360	+	0.000640612
chr15	53158520	53158540	+	6.9168e-05
chr15	53158680	53158700	+	2.08079e-05
chr15	53158780	53158800	+	2.08079e-05
chr15	53158840	53158860	+	1.70931e-06
chr15	53160780	53160800	+	0.000218793
chr15	53161100	53161120	+	6.01748e-06
chr15	53162560	53162580	+	0.000218793
chr15	53163420	53163440	+	0.000218793
chr15	53163960	53163980	+	0.000640612
chr15	53164260	53164280	+	0.000640612
chr15	53165480	53165500	+	0.000218793
chr15	53165820	53165840	+	0.000640612
chr15	53166040	53166060	+	0.000640612
chr15	53166380	53166400	+	3.45468e-08
chr15	53166480	53166500	+	0.000218793
chr15	53167160	53167180	+	6.9168e-05
chr15	53167460	53167480	+	0.000218793
chr15	53167520	53167580	+	0.000218793
chr15	53167700	53167720	+	6.01748e-06
chr15	53167920	53167960	+	0.000429702
chr15	53168060	53168080	+	6.9168e-05
chr15	53168100	53168120	+	0.000640612
chr15	53168220	53168240	+	0.000640612
chr15	53169040	53169080	+	0.000323315
chr15	53169200	53169220	+	0.000218793
chr15	53169300	53169320	+	0.000640612
chr15	53170140	53170160	+	4.76175e-07
chr15	53170180	53170200	+	2.08079e-05
chr15	53170360	53170380	+	6.9168e-05
chr15	53170680	53170740	+	0.000500005
chr15	53171160	53171200	+	0.00035489
chr15	53171280	53171300	+	0.000640612
chr15	53171800	53171820	+	0.000640612
chr15	53172360	53172380	+	6.9168e-05
chr15	53172840	53172860	+	0.000640612
chr15	53172960	53172980	+	6.9168e-05
chr15	53173600	53173620	+	0.000218793
chr15	53173920	53173940	+	0.000218793
chr15	53174020	53174040	+	6.9168e-05
chr15	53174600	53174620	+	0.000640612
chr15	53175080	53175120	+	0.000112405
chr15	53175440	53175460	+	1.70931e-06
chr15	53175680	53175700	+	0.000218793
chr15	53175820	53175840	+	1.70931e-06
chr15	53176000	53176040	+	1.12586e-05
chr15	53176060	53176080	+	3.45468e-08
chr15	53176120	53176140	+	1.29582e-07
chr15	53176280	53176320	+	0.00035489
chr15	53176380	53176420	+	0.000429702
chr15	53176640	53176660	+	1.29582e-07
chr15	53176720	53176760	+	0.0001198
chr15	53176800	53176820	+	2.08079e-05
chr15	53176860	53176880	+	4.76175e-07
chr15	53177300	53177340	+	0.000323315
chr15	53177360	53177380	+	0.000640612
chr15	53177400	53177420	+	1.70931e-06
chr15	53177480	53177500	+	0.000640612
chr15	53177540	53177660	+	0.000240346
chr15	57703200	57703240	+	0.000640612
chr15	57929940	57929960	+	1.29582e-07
chr15	58775500	58775520	+	1.70931e-06
chr15	63920180	63920200	+	6.9168e-05
chr15	63921000	63921020	+	0.000640612
chr15	63921280	63921300	+	6.9168e-05
chr15	63925580	63925600	+	6.9168e-05
chr15	63955440	63955460	+	0.000218793
chr15	66762480	66762500	+	2.08079e-05
chr15	66934500	66934520	+	0.000640612
chr15	74536140	74536160	+	0.000218793
chr15	74578440	74578460	+	2.08079e-05
chr15	75900700	75900720	+	6.9168e-05
chr15	76001560	76001600	+	0.00014398
chr15	76001680	76001700	+	9.0622e-09
chr15	76001880	76001900	+	0.000218793
chr15	76001940	76001960	+	6.9168e-05
chr15	76002000	76002040	+	0.00032116
chr15	76002100	76002140	+	1.12586e-05
chr15	76002160	76002220	+	1.44417e-05
chr15	76002240	76002260	+	6.01748e-06
chr15	76002300	76002320	+	3.45468e-08
chr15	76002360	76002380	+	0.000640612
chr15	76002640	76002680	+	0.00033071
chr15	76002780	76002800	+	0.000640612
chr15	76002880	76002900	+	6.01748e-06
chr15	76002920	76002980	+	0.000640612
chr15	76003000	76003020	+	6.01748e-06
chr15	76003040	76003060	+	4.76175e-07
chr15	76003080	76003120	+	0.00035489
chr15	76003140	76003160	+	0.000218793
chr15	76003320	76003340	+	0.000640612
chr15	76003400	76003460	+	0.000168918
chr15	76003480	76003520	+	9.19444e-07
chr15	76003600	76003680	+	0.000271054
chr15	76003700	76003740	+	6.9168e-05
chr15	76003880	76003900	+	4.76175e-07
chr15	76003980	76004000	+	0.000640612
chr15	76004040	76004060	+	6.01748e-06
chr15	76004160	76004220	+	9.60302e-05
chr15	76004320	76004360	+	0.0001198
chr15	76004400	76004420	+	0.000218793
chr15	76004640	76004660	+	2.08079e-05
chr15	76004900	76004960	+	0.000309524
chr15	76005120	76005140	+	6.9168e-05
chr15	76005180	76005200	+	0.000640612
chr15	76005220	76005240	+	0.000640612
chr15	76005260	76005340	+	0.000321929
chr15	76005420	76005440	+	9.0622e-09
chr15	76005480	76005500	+	0.000640612
chr15	76005820	76005860	+	0.00035489
chr15	76005940	76005980	+	0.000640612
chr15	76006180	76006200	+	0.000218793
chr15	76006240	76006320	+	0.00023257
chr15	76006580	76006600	+	2.08079e-05
chr15	76006620	76006680	+	7.69426e-05
chr15	76006700	76006720	+	0.000218793
chr15	76006740	76006800	+	0.000500005
chr15	76006840	76006860	+	0.000218793
chr15	76006920	76006960	+	0.000218793
chr15	76007120	76007160	+	0.0001198
chr15	76007520	76007560	+	0.000323315
chr15	76007620	76007640	+	1.29582e-07
chr15	76007680	76007720	+	0.00014398
chr15	76007760	76007780	+	0.000218793
chr15	76007820	76007840	+	2.08079e-05
chr15	76007900	76007920	+	6.9168e-05
chr15	76008020	76008080	+	0.000147868
chr15	76008120	76008160	+	3.54386e-05
chr15	76008180	76008200	+	0.000218793
chr15	76008220	76008280	+	0.000293404
chr15	76008400	76008420	+	5.93293e-10
chr15	76008660	76008680	+	4.76175e-07
chr15	76008820	76008840	+	6.9168e-05
chr15	76009100	76009120	+	0.000218793
chr15	76009660	76009700	+	0.00035489
chr15	76009860	76009880	+	4.76175e-07
chr15	76010500	76010520	+	0.000640612
chr15	76010660	76010680	+	0.000218793
chr15	76010820	76010840	+	0.000640612
chr15	76010860	76010900	+	0.000429702
chr15	76010980	76011000	+	0.000218793
chr15	76011120	76011140	+	2.08079e-05
chr15	76011200	76011220	+	0.000640612
chr15	76011360	76011400	+	0.000218793
chr15	76011680	76011700	+	0.000218793
chr15	76011980	76012000	+	2.08079e-05
chr15	76012840	76012860	+	6.9168e-05
chr15	76013340	76013360	+	0.000640612
chr15	76013380	76013400	+	6.9168e-05
chr15	76013540	76013580	+	0.00014398
chr15	76014080	76014100	+	2.08079e-05
chr15	76014400	76014440	+	0.00014398
chr15	76018460	76018480	+	0.000218793
chr15	76019560	76019580	+	1.70931e-06
chr15	76019740	76019760	+	4.76175e-07
chr15	76020520	76020540	+	6.9168e-05
chr15	76476380	76476400	+	2.08079e-05
chr15	76476620	76476640	+	6.9168e-05
chr15	76913960	76914060	+	0.000190218
chr15	76934300	76934320	+	0.000640612
chr15	76937040	76937060	+	6.01748e-06
chr15	76937480	76937500	+	6.9168e-05
chr15	76937800	76937820	+	0.000218793
chr15	76963180	76963200	+	0.000218793
chr15	77591080	77591100	+	6.9168e-05
chr15	77591460	77591500	+	3.86339e-06
chr15	77591540	77591560	+	6.9168e-05
chr15	77591640	77591740	+	0.000219896
chr15	77592180	77592200	+	3.45468e-08
chr15	77592240	77592280	+	3.46488e-05
chr15	77592300	77592320	+	1.70931e-06
chr15	77593460	77593480	+	0.000640612
chr15	77593520	77593540	+	6.9168e-05
chr15	77594380	77594400	+	0.000218793
chr15	77594720	77594740	+	0.000640612
chr15	77597640	77597660	+	6.01748e-06
chr15	77598060	77598080	+	1.70931e-06
chr15	77599240	77599260	+	1.70931e-06
chr15	77599340	77599360	+	6.9168e-05
chr15	77599620	77599640	+	2.08079e-05
chr15	77599980	77600020	+	3.02879e-07
chr15	77605620	77605660	+	0.00035489
chr15	77622700	77622740	+	4.4988e-05
chr15	77622900	77622920	+	0.000640612
chr15	77623560	77623580	+	0.000218793
chr15	77624520	77624540	+	6.9168e-05
chr15	77625340	77625360	+	2.08079e-05
chr15	77626400	77626420	+	0.000218793
chr15	77627900	77627920	+	6.9168e-05
chr15	77629240	77629260	+	0.000640612
chr15	77629320	77629340	+	0.000640612
chr15	77629480	77629500	+	2.08079e-05
chr15	77631420	77631440	+	0.000640612
chr15	77632580	77632600	+	0.000640612
chr15	77635280	77635300	+	0.000640612
chr15	77635360	77635380	+	6.01748e-06
chr15	77636160	77636180	+	0.000218793
chr15	77636320	77636340	+	0.000218793
chr15	77637440	77637460	+	6.01748e-06
chr15	77637780	77637820	+	1.04688e-05
chr15	77637880	77637900	+	0.000640612
chr15	77638420	77638440	+	6.9168e-05
chr15	77745500	77745540	+	0.000640612
chr15	77789980	77790000	+	6.9168e-05
chr15	79206180	79206200	+	1.70931e-06
chr15	79249100	79249120	+	0.000640612
chr15	79249360	79249380	+	3.45468e-08
chr15	79253180	79253200	+	0.000640612
chr15	79254040	79254060	+	0.000218793
chr15	79360400	79360420	+	6.01748e-06
chr15	79360540	79360560	+	1.29582e-07
chr15	79654580	79654620	+	0.000429702
chr15	79655760	79655780	+	6.9168e-05
chr15	79655900	79655920	+	1.70931e-06
chr15	79656900	79656920	+	0.000218793
chr15	79657840	79657900	+	0.000236596
chr15	79658080	79658100	+	6.01748e-06
chr15	79658640	79658660	+	0.000218793
chr15	79658680	79658700	+	0.000218793
chr15	79658780	79658840	+	0.000238599
chr15	79658920	79658940	+	0.000640612
chr15	79659120	79659140	+	0.000218793
chr15	79661540	79661560	+	0.000640612
chr15	79662760	79662800	+	0.000429702
chr15	80842800	80842820	+	0.000640612
chr15	80843620	80843640	+	6.9168e-05
chr15	80843700	80843720	+	6.9168e-05
chr15	80843780	80843800	+	0.000218793
chr15	81196800	81196880	+	0.000535157
chr15	81208160	81208180	+	6.9168e-05
chr15	82682380	82682400	+	4.76175e-07
chr15	82682860	82682900	+	0.000218793
chr15	82683580	82683600	+	0.000640612
chr15	82958400	82958420	+	6.9168e-05
chr15	82984020	82984060	+	0.000112405
chr15	82984080	82984120	+	0.00033071
chr15	82984320	82984380	+	0.000500005
chr15	83058740	83058800	+	8.07551e-06
chr15	83058840	83058860	+	2.08079e-05
chr15	85971240	85971260	+	2.08079e-05
chr15	85971300	85971320	+	6.9168e-05
chr15	88560560	88560580	+	1.70931e-06
chr15	88986280	88986300	+	6.01748e-06
chr15	88986340	88986360	+	0.000640612
chr15	88986640	88986660	+	0.000640612
chr15	93159000	93159020	+	0.000640612
chr15	96248800	96248820	+	6.9168e-05
chr15	96249840	96249860	+	0.000640612
chr15	96518380	96518400	+	0.000218793
chr15	96518560	96518600	+	0.000640612
chr15	96518660	96518720	+	0.000500005
chr15	96518740	96518760	+	0.000218793
chr15	96518800	96518820	+	6.01748e-06
chr15	96529220	96529240	+	0.000640612
chr15	96529840	96529880	+	3.75927e-05
chr15	98423100	98423120	+	1.70931e-06
chr15	98664540	98664560	+	6.01748e-06
chr15	98669840	98669860	+	0.000640612
chr15	98674160	98674180	+	1.70931e-06
chr15	98674300	98674320	+	6.9168e-05
chr15	98675360	98675380	+	0.000640612
chr15	98680140	98680160	+	6.9168e-05
chr15	98680440	98680460	+	1.70931e-06
chr15	98680920	98680960	+	0.000323315
chr15	98692800	98692840	+	0.00035489
chr15	98693760	98693780	+	2.08079e-05
chr15	98693820	98693840	+	0.000218793
chr15	98693860	98693900	+	1.0642e-05
chr15	98693920	98693940	+	1.70931e-06
chr15	98694180	98694220	+	0.000429702
chr15	98780420	98780440	+	0.000218793
chr15	99257140	99257160	+	0.000640612
chr15	99471520	99471540	+	0.000218793
chr15	99609620	99609640	+	0.000640612
chr15	99610280	99610300	+	2.08079e-05
chr15	99611160	99611180	+	0.000218793
chr15	99611300	99611320	+	0.000218793
chr15	99611360	99611380	+	6.9168e-05
chr15	103029980	103030000	+	2.08079e-05
chr15	103032340	103032360	+	6.01748e-06
chr15	103174780	103174820	+	0.000109461
chr15	103174880	103174900	+	0.000218793
chr15	103175340	103175360	+	0.000640612
chr15	103178320	103178340	+	0.000640612
chr16	4085200	4085220	+	0.000640612
chr16	4179760	4179780	+	2.08079e-05
chr16	4418280	4418300	+	2.08079e-05
chr16	4875420	4875440	+	0.000640612
chr16	8660520	8660540	+	6.9168e-05
chr16	10284040	10284060	+	1.29582e-07
chr16	10530920	10530940	+	0.000640612
chr16	10541760	10541780	+	0.000218793
chr16	11220720	11220740	+	0.000640612
chr16	17152180	17152200	+	6.01748e-06
chr16	18224940	18224960	+	6.9168e-05
chr16	18240880	18240900	+	0.000640612
chr16	45383180	45383200	+	1.70931e-06
chr16	45763140	45763160	+	2.08079e-05
chr16	45808580	45808600	+	0.000218793
chr16	45825060	45825080	+	2.08079e-05
chr16	45825180	45825200	+	6.9168e-05
chr16	55905500	55905520	+	6.9168e-05
chr16	56690880	56690900	+	0.000640612
chr16	84955400	84955420	+	2.08079e-05
chr16	84955500	84955520	+	0.000218793
chr16	84971660	84971680	+	1.70931e-06
chr16	84978320	84978360	+	0.000323315
chr16	84978420	84978440	+	6.01748e-06
chr16	85013900	85013920	+	6.01748e-06
chr16	85080160	85080180	+	0.000218793
chr16	92605980	92606000	+	0.000640612
chr16	92606120	92606160	+	0.00032116
chr16	92606200	92606220	+	6.9168e-05
chr16	92609860	92609880	+	2.08079e-05
chr16	92613840	92613880	+	0.000323315
chr16	92616340	92616360	+	0.000218793
chr16	92620560	92620580	+	0.000218793
chr16	92629220	92629240	+	6.9168e-05
chr16	92629900	92629920	+	0.000640612
chr16	92632200	92632220	+	0.000640612
chr16	92641800	92641840	+	0.000429702
chr16	92643120	92643140	+	0.000640612
chr16	92665240	92665260	+	6.9168e-05
chr16	96222800	96222820	+	0.000218793
chr16	96223420	96223440	+	0.000640612
chr16	98171640	98171660	+	4.76175e-07
chr17	6957340	6957360	+	6.9168e-05
chr17	10402400	10402420	+	0.000640612
chr17	10457060	10457080	+	0.000218793
chr17	12464800	12464820	+	0.000640612
chr17	15944120	15944140	+	6.9168e-05
chr17	15944260	15944280	+	6.9168e-05
chr17	15957640	15957660	+	0.000218793
chr17	17715880	17715900	+	0.000640612
chr17	24322820	24322840	+	6.9168e-05
chr17	26643260	26643280	+	0.000218793
chr17	28727040	28727080	+	0.000640612
chr17	31981520	31981540	+	0.000218793
chr17	32259420	32259440	+	6.9168e-05
chr17	32333980	32334000	+	0.000218793
chr17	32334460	32334500	+	0.000640612
chr17	32334660	32334680	+	0.000218793
chr17	32339180	32339200	+	0.000640612
chr17	32350620	32350640	+	4.76175e-07
chr17	32470080	32470100	+	0.000640612
chr17	32470480	32470500	+	0.000218793
chr17	32470880	32470900	+	0.000640612
chr17	32470940	32471000	+	0.000500005
chr17	33786720	33786740	+	0.000640612
chr17	33787000	33787020	+	0.000640612
chr17	33801520	33801540	+	0.000640612
chr17	33807220	33807240	+	0.000640612
chr17	34020320	34020340	+	2.08079e-05
chr17	34165420	34165440	+	6.01748e-06
chr17	34166600	34166620	+	0.000640612
chr17	34167500	34167520	+	6.01748e-06
chr17	34167620	34167640	+	6.9168e-05
chr17	34167920	34167980	+	0.000359399
chr17	34168000	34168020	+	2.33391e-09
chr17	34249320	34249340	+	6.9168e-05
chr17	34249420	34249440	+	1.70931e-06
chr17	34251880	34251900	+	2.08079e-05
chr17	35291860	35291900	+	0.000109461
chr17	35291960	35291980	+	0.000218793
chr17	35292500	35292520	+	0.000218793
chr17	35292720	35292740	+	2.08079e-05
chr17	35292760	35292800	+	0.0001198
chr17	35292940	35292960	+	0.000218793
chr17	35293080	35293100	+	0.000218793
chr17	35293140	35293160	+	1.29582e-07
chr17	35293520	35293540	+	1.70931e-06
chr17	35293700	35293720	+	0.000218793
chr17	35294000	35294020	+	6.9168e-05
chr17	35295040	35295060	+	0.000218793
chr17	35295340	35295360	+	6.9168e-05
chr17	35296780	35296820	+	0.00032116
chr17	35971840	35971860	+	0.000640612
chr17	35971880	35971900	+	2.08079e-05
chr17	35971960	35972020	+	2.50648e-05
chr17	35972120	35972140	+	6.01748e-06
chr17	35972160	35972180	+	0.000640612
chr17	35972340	35972380	+	0.000109635
chr17	35972420	35972440	+	6.01748e-06
chr17	35972460	35972480	+	6.01748e-06
chr17	35972520	35972600	+	0.000199939
chr17	45533380	45533400	+	0.000640612
chr17	45704960	45705000	+	4.4988e-05
chr17	45705020	45705040	+	2.08079e-05
chr17	45705200	45705240	+	0.000429702
chr17	45705420	45705480	+	0.000427086
chr17	45706480	45706520	+	0.00035489
chr17	45706700	45706720	+	0.000640612
chr17	45707280	45707300	+	2.08079e-05
chr17	45708000	45708020	+	0.000218793
chr17	45708440	45708460	+	6.01748e-06
chr17	45708520	45708540	+	0.000640612
chr17	45710140	45710200	+	7.55066e-05
chr17	46154720	46154740	+	2.08079e-05
chr17	46154860	46154880	+	6.9168e-05
chr17	46155220	46155240	+	0.000640612
chr17	46155300	46155320	+	6.01748e-06
chr17	46155580	46155620	+	0.00014398
chr17	46165760	46165780	+	0.000640612
chr17	46166240	46166260	+	2.08079e-05
chr17	46166820	46166840	+	0.000218793
chr17	46166860	46166880	+	0.000218793
chr17	46167500	46167520	+	2.08079e-05
chr17	46167640	46167660	+	0.000218793
chr17	46168640	46168660	+	0.000640612
chr17	46168820	46168840	+	0.000218793
chr17	46168860	46168880	+	0.000640612
chr17	46820660	46820680	+	2.08079e-05
chr17	47626260	47626280	+	0.000640612
chr17	56409480	56409500	+	0.000640612
chr17	56409600	56409620	+	2.08079e-05
chr17	56552680	56552720	+	0.000640612
chr17	56558860	56558880	+	0.000218793
chr17	56563540	56563560	+	0.000640612
chr17	56715160	56715180	+	0.000218793
chr17	57162080	57162120	+	0.00035489
chr17	64653400	64653420	+	0.000218793
chr17	68194000	68194020	+	0.000640612
chr17	68194480	68194500	+	1.29582e-07
chr17	71193680	71193700	+	6.01748e-06
chr17	71194260	71194300	+	4.4988e-05
chr17	79335080	79335100	+	2.08079e-05
chr17	79734120	79734140	+	2.08079e-05
chr17	79734160	79734200	+	0.000112405
chr17	79734460	79734480	+	0.000640612
chr17	79734600	79734620	+	0.000640612
chr17	79734660	79734680	+	0.000218793
chr17	79734700	79734720	+	2.08079e-05
chr17	83901480	83901500	+	6.9168e-05
chr17	84584940	84585020	+	0.000338025
chr17	84585140	84585160	+	0.000640612
chr17	84585220	84585280	+	0.000220485
chr17	84585400	84585460	+	0.000640612
chr17	84585540	84585560	+	0.000218793
chr17	84585660	84585680	+	6.9168e-05
chr17	84585900	84585940	+	0.0001198
chr18	6107320	6107340	+	1.70931e-06
chr18	32688680	32688760	+	0.000376508
chr18	34017680	34017700	+	0.000218793
chr18	34017780	34017800	+	6.01748e-06
chr18	34017920	34017940	+	6.9168e-05
chr18	34792740	34792760	+	0.000218793
chr18	34793200	34793220	+	6.01748e-06
chr18	36581840	36581860	+	1.70931e-06
chr18	37996920	37996940	+	6.9168e-05
chr18	38357480	38357500	+	3.45468e-08
chr18	43483700	43483720	+	6.9168e-05
chr18	46664800	46664820	+	6.9168e-05
chr18	47408140	47408160	+	6.9168e-05
chr18	47408180	47408200	+	6.9168e-05
chr18	52680460	52680480	+	0.000640612
chr18	52680520	52680540	+	2.08079e-05
chr18	52687980	52688000	+	0.000218793
chr18	52688580	52688620	+	1.34127e-05
chr18	60634180	60634200	+	0.000640612
chr18	60634640	60634660	+	0.000640612
chr18	60634820	60634860	+	3.07353e-06
chr18	60762020	60762040	+	0.000218793
chr18	61857080	61857100	+	0.000640612
chr18	62675100	62675120	+	2.08079e-05
chr18	84184980	84185000	+	0.000640612
chr19	4318800	4318820	+	0.000640612
chr19	4318980	4319000	+	0.000640612
chr19	4319120	4319140	+	0.000218793
chr19	4613900	4613920	+	6.01748e-06
chr19	4761960	4761980	+	6.9168e-05
chr19	4787560	4787580	+	2.08079e-05
chr19	4787840	4787860	+	0.000640612
chr19	4803720	4803740	+	0.000640612
chr19	5042320	5042340	+	0.000640612
chr19	5274420	5274440	+	0.000640612
chr19	5284620	5284640	+	0.000218793
chr19	5287140	5287160	+	6.9168e-05
chr19	5452640	5452660	+	0.000218793
chr19	5660720	5660740	+	0.000218793
chr19	5716280	5716300	+	2.08079e-05
chr19	5918260	5918280	+	0.000218793
chr19	7028960	7028980	+	0.000640612
chr19	7289660	7289700	+	0.000640612
chr19	9968320	9968340	+	0.000640612
chr19	10932500	10932520	+	6.01748e-06
chr19	10933100	10933120	+	6.01748e-06
chr19	12844120	12844140	+	0.000218793
chr19	12844700	12844720	+	6.9168e-05
chr19	18656200	18656220	+	0.000218793
chr19	18656540	18656560	+	0.000218793
chr19	36186780	36186800	+	0.000218793
chr19	36187220	36187240	+	6.01748e-06
chr19	38144000	38144020	+	6.9168e-05
chr19	40317960	40317980	+	0.000640612
chr19	43738340	43738360	+	0.000640612
chr19	44471860	44471880	+	6.01748e-06
chr19	44477720	44477760	+	0.000429702
chr19	46107120	46107140	+	0.000640612
chr19	46107260	46107320	+	0.000427118
chr19	46107340	46107360	+	2.08079e-05
chr19	46107640	46107660	+	0.000640612
chr19	47339380	47339400	+	0.000218793
chr19	47339920	47339940	+	0.000218793
chr19	47340060	47340080	+	6.9168e-05
chr19	47341160	47341180	+	2.08079e-05
chr19	47341680	47341700	+	0.000640612
chr19	47341720	47341740	+	2.08079e-05
chr19	47341780	47341820	+	0.00035489
chr19	47341860	47341880	+	0.000640612
chr19	47342000	47342020	+	6.9168e-05
chr19	47342260	47342280	+	0.000218793
chr19	47342420	47342440	+	0.000218793
chr19	47342660	47342700	+	0.00014398
chr19	47342880	47342900	+	0.000640612
chr19	47343060	47343080	+	0.000218793
chr19	47969340	47969360	+	0.000640612
chr19	47969480	47969500	+	2.08079e-05
chr19	47969960	47970000	+	0.00035489
chr19	47971960	47971980	+	6.01748e-06
chr19	59375660	59375680	+	6.01748e-06
chr2	20771120	20771140	+	0.000640612
chr2	20771380	20771400	+	0.000640612
chr2	20771920	20771940	+	0.000218793
chr2	20802140	20802160	+	2.08079e-05
chr2	20802680	20802700	+	0.000640612
chr2	20802880	20802900	+	6.01748e-06
chr2	25050300	25050340	+	0.000323315
chr2	25077740	25077760	+	6.9168e-05
chr2	25077980	25078000	+	0.000218793
chr2	25442900	25442920	+	0.000640612
chr2	26242540	26242560	+	6.01748e-06
chr2	26315120	26315140	+	6.9168e-05
chr2	26315940	26315980	+	0.000110251
chr2	27301700	27301720	+	0.000218793
chr2	30328380	30328400	+	0.000640612
chr2	30328660	30328680	+	6.9168e-05
chr2	32563240	32563260	+	0.000640612
chr2	34678300	34678320	+	2.08079e-05
chr2	35051940	35051960	+	0.000640612
chr2	36037300	36037320	+	0.000640612
chr2	37207540	37207560	+	6.9168e-05
chr2	44844360	44844380	+	6.9168e-05
chr2	44844520	44844540	+	2.08079e-05
chr2	44851680	44851720	+	0.000429702
chr2	44852140	44852160	+	2.08079e-05
chr2	50987860	50987880	+	6.01748e-06
chr2	59795800	59795820	+	0.000218793
chr2	64936140	64936160	+	6.9168e-05
chr2	72780420	72780440	+	0.000640612
chr2	72808200	72808220	+	0.000640612
chr2	72808320	72808340	+	0.000218793
chr2	72808460	72808480	+	4.76175e-07
chr2	72808660	72808680	+	0.000218793
chr2	72808700	72808720	+	0.000640612
chr2	75514380	75514400	+	4.76175e-07
chr2	75514820	75514840	+	6.01748e-06
chr2	75514900	75514940	+	0.000429702
chr2	84442280	84442300	+	4.76175e-07
chr2	84442800	84442840	+	0.00032116
chr2	84442920	84442940	+	1.29582e-07
chr2	84443020	84443040	+	6.01748e-06
chr2	102654300	102654320	+	2.08079e-05
chr2	102662380	102662420	+	0.00033071
chr2	102667400	102667420	+	0.000640612
chr2	102681980	102682000	+	0.000640612
chr2	102682220	102682240	+	2.08079e-05
chr2	102689880	102689900	+	2.08079e-05
chr2	102691500	102691520	+	0.000218793
chr2	102692220	102692240	+	6.9168e-05
chr2	102693200	102693240	+	0.000640612
chr2	102693360	102693380	+	0.000640612
chr2	104672700	104672720	+	6.9168e-05
chr2	104672880	104672900	+	6.01748e-06
chr2	113588200	113588220	+	6.9168e-05
chr2	113589240	113589260	+	2.08079e-05
chr2	113589280	113589320	+	1.0642e-05
chr2	113589400	113589420	+	2.08079e-05
chr2	113589520	113589560	+	0.000429702
chr2	113589600	113589620	+	0.000640612
chr2	113589680	113589700	+	0.000218793
chr2	113589960	113589980	+	2.08079e-05
chr2	113673120	113673140	+	0.000640612
chr2	113673520	113673540	+	6.01748e-06
chr2	113673640	113673660	+	1.70931e-06
chr2	115690060	115690100	+	0.000323315
chr2	115690220	115690240	+	0.000640612
chr2	115744940	115744960	+	0.000218793
chr2	115746420	115746440	+	0.000218793
chr2	115789280	115789300	+	6.01748e-06
chr2	115820160	115820180	+	0.000640612
chr2	115824100	115824120	+	0.000640612
chr2	115881700	115881720	+	2.08079e-05
chr2	115882700	115882720	+	0.000640612
chr2	115883000	115883020	+	6.9168e-05
chr2	115888960	115888980	+	0.000640612
chr2	115889020	115889040	+	0.000640612
chr2	115889980	115890000	+	0.000218793
chr2	115890460	115890480	+	6.01748e-06
chr2	120359520	120359540	+	1.70931e-06
chr2	120362980	120363000	+	0.000640612
chr2	120365140	120365160	+	0.000640612
chr2	122190740	122190760	+	0.000218793
chr2	122510760	122510780	+	6.9168e-05
chr2	129094340	129094360	+	6.9168e-05
chr2	129111140	129111160	+	2.08079e-05
chr2	131003520	131003560	+	1.12586e-05
chr2	131003600	131003620	+	0.000218793
chr2	131003760	131003780	+	4.76175e-07
chr2	131003920	131003940	+	6.01748e-06
chr2	131003960	131003980	+	0.000640612
chr2	131004640	131004660	+	0.000640612
chr2	131004680	131004720	+	8.59184e-07
chr2	131004820	131004840	+	9.0622e-09
chr2	131004900	131004920	+	0.000218793
chr2	131005220	131005240	+	4.76175e-07
chr2	131018000	131018020	+	6.9168e-05
chr2	132077100	132077120	+	0.000640612
chr2	143784040	143784060	+	6.9168e-05
chr2	143800280	143800320	+	3.54386e-05
chr2	143804280	143804300	+	0.000218793
chr2	143805340	143805360	+	0.000218793
chr2	143815560	143815600	+	3.75927e-05
chr2	143815660	143815680	+	0.000218793
chr2	148232080	148232100	+	6.9168e-05
chr2	148697500	148697520	+	0.000640612
chr2	150775520	150775540	+	4.76175e-07
chr2	151795480	151795500	+	1.70931e-06
chr2	151796140	151796160	+	0.000640612
chr2	152655520	152655540	+	2.08079e-05
chr2	152757980	152758000	+	0.000218793
chr2	155231680	155231700	+	6.9168e-05
chr2	155643800	155643820	+	0.000640612
chr2	155922600	155922620	+	6.9168e-05
chr2	155923320	155923380	+	7.49483e-05
chr2	155923400	155923420	+	4.76175e-07
chr2	155923480	155923500	+	6.9168e-05
chr2	155923540	155923560	+	0.000640612
chr2	155923600	155923620	+	6.01748e-06
chr2	156842460	156842480	+	0.000218793
chr2	156842500	156842520	+	1.70931e-06
chr2	156842540	156842560	+	2.08079e-05
chr2	156843580	156843600	+	0.000640612
chr2	156846460	156846480	+	6.9168e-05
chr2	156846500	156846520	+	4.76175e-07
chr2	156866320	156866340	+	2.08079e-05
chr2	163222740	163222760	+	0.000640612
chr2	163223340	163223360	+	0.000218793
chr2	163223380	163223400	+	0.000218793
chr2	164827020	164827040	+	0.000218793
chr2	165611080	165611100	+	6.9168e-05
chr2	165633500	165633520	+	2.08079e-05
chr2	165636760	165636780	+	0.000218793
chr2	165637940	165637960	+	0.000218793
chr2	165640840	165640860	+	0.000640612
chr2	166774400	166774420	+	6.9168e-05
chr2	167434060	167434080	+	0.000218793
chr2	168007220	168007240	+	0.000640612
chr2	168008460	168008500	+	3.75927e-05
chr2	168009140	168009160	+	6.9168e-05
chr2	168009540	168009580	+	0.00014398
chr2	168009980	168010000	+	0.000640612
chr2	168010180	168010200	+	0.000218793
chr2	169939960	169939980	+	6.9168e-05
chr2	169940040	169940060	+	0.000218793
chr2	179648580	179648600	+	0.000640612
chr2	179648640	179648680	+	0.000429702
chr2	179648720	179648760	+	0.00035489
chr2	179649120	179649140	+	0.000218793
chr2	179649560	179649580	+	0.000640612
chr2	180396440	180396460	+	0.000640612
chr2	180396900	180396920	+	0.000218793
chr2	180988620	180988640	+	0.000640612
chr3	19127680	19127700	+	2.08079e-05
chr3	38353220	38353240	+	0.000640612
chr3	57349060	57349080	+	6.9168e-05
chr3	57374700	57374720	+	4.76175e-07
chr3	67006140	67006160	+	0.000218793
chr3	68889100	68889120	+	1.70931e-06
chr3	75721460	75721480	+	0.000640612
chr3	75760100	75760120	+	1.70931e-06
chr3	75760240	75760280	+	0.000640612
chr3	86886940	86886960	+	6.9168e-05
chr3	88285940	88285960	+	0.000218793
chr3	88286280	88286300	+	1.70931e-06
chr3	88287160	88287200	+	6.9168e-05
chr3	88290140	88290200	+	8.68029e-05
chr3	88290440	88290460	+	0.000640612
chr3	88294440	88294460	+	0.000218793
chr3	88305860	88305880	+	0.000640612
chr3	88306740	88306780	+	0.000429702
chr3	88307000	88307020	+	6.01748e-06
chr3	89184600	89184620	+	1.29582e-07
chr3	89813980	89814000	+	0.000218793
chr3	90016880	90016900	+	0.000218793
chr3	90304460	90304480	+	6.9168e-05
chr3	90306120	90306140	+	0.000640612
chr3	95131240	95131260	+	0.000218793
chr3	100864800	100864820	+	6.01748e-06
chr3	104806820	104806840	+	6.9168e-05
chr3	104807600	104807620	+	0.000218793
chr3	104808920	104808940	+	6.9168e-05
chr3	105745720	105745740	+	0.000640612
chr3	107133540	107133560	+	0.000640612
chr3	107133880	107133900	+	0.000640612
chr3	107134360	107134380	+	0.000218793
chr3	107134460	107134480	+	2.08079e-05
chr3	107134580	107134600	+	6.01748e-06
chr3	107135020	107135060	+	0.000429702
chr3	107135160	107135220	+	5.3048e-05
chr3	107545180	107545220	+	0.00014398
chr3	107545240	107545260	+	3.45468e-08
chr3	107545300	107545320	+	1.70931e-06
chr3	107545540	107545560	+	6.01748e-06
chr3	107545800	107545820	+	0.000218793
chr3	107545940	107545960	+	0.000640612
chr3	107551100	107551120	+	6.01748e-06
chr3	107551500	107551540	+	6.01748e-06
chr3	107551620	107551640	+	0.000218793
chr3	107551880	107551920	+	0.000109461
chr3	107551960	107552020	+	7.99102e-05
chr3	110053660	110053680	+	2.08079e-05
chr3	122816140	122816160	+	6.9168e-05
chr3	127540200	127540220	+	0.000218793
chr3	129686560	129686580	+	4.76175e-07
chr3	142456440	142456460	+	6.9168e-05
chr3	142456840	142456860	+	0.000640612
chr3	144350980	144351000	+	0.000640612
chr3	144351620	144351640	+	0.000218793
chr3	145310380	145310420	+	0.0001198
chr3	145310440	145310460	+	1.70931e-06
chr3	145310520	145310540	+	6.9168e-05
chr3	145310640	145310680	+	0.000320544
chr3	145310780	145310800	+	0.000640612
chr3	148480500	148480520	+	0.000640612
chr4	4692500	4692520	+	6.9168e-05
chr4	9380380	9380400	+	0.000218793
chr4	33333280	33333300	+	0.000218793
chr4	40883540	40883560	+	0.000218793
chr4	41148520	41148540	+	0.000218793
chr4	41150120	41150140	+	0.000640612
chr4	42993720	42993740	+	6.9168e-05
chr4	43049400	43049420	+	6.9168e-05
chr4	43528320	43528340	+	0.000640612
chr4	43536260	43536280	+	0.000218793
chr4	43566320	43566340	+	0.000640612
chr4	47483000	47483020	+	0.000218793
chr4	55542320	55542340	+	0.000640612
chr4	55542940	55542960	+	6.9168e-05
chr4	55543100	55543120	+	0.000640612
chr4	57890280	57890300	+	0.000218793
chr4	57890320	57890360	+	0.000109401
chr4	58450240	58450260	+	0.000218793
chr4	58499720	58499740	+	0.000640612
chr4	63678560	63678580	+	0.000640612
chr4	88366880	88366900	+	1.70931e-06
chr4	94336040	94336060	+	0.000640612
chr4	94716560	94716580	+	0.000640612
chr4	94716980	94717000	+	2.08079e-05
chr4	94717020	94717040	+	0.000640612
chr4	94717200	94717240	+	0.00035489
chr4	94717280	94717340	+	0.000286627
chr4	94717380	94717400	+	0.000640612
chr4	94717440	94717460	+	6.01748e-06
chr4	94717720	94717740	+	2.08079e-05
chr4	94717820	94717840	+	0.000218793
chr4	94717900	94717920	+	6.01748e-06
chr4	94718080	94718120	+	0.000429702
chr4	94718280	94718300	+	0.000640612
chr4	94718480	94718500	+	6.9168e-05
chr4	100825800	100825820	+	0.000218793
chr4	109126940	109126960	+	6.9168e-05
chr4	116826560	116826580	+	1.70931e-06
chr4	116826720	116826740	+	1.70931e-06
chr4	116827140	116827160	+	1.29582e-07
chr4	116827280	116827300	+	6.9168e-05
chr4	116827320	116827340	+	0.000640612
chr4	116827820	116827880	+	4.66818e-05
chr4	116959820	116959840	+	2.08079e-05
chr4	117546420	117546440	+	0.000218793
chr4	117810580	117810620	+	0.00035489
chr4	118843220	118843240	+	0.000640612
chr4	118898940	118898960	+	2.08079e-05
chr4	118951680	118951700	+	0.000640612
chr4	118954780	118954800	+	0.000218793
chr4	118961880	118961900	+	0.000218793
chr4	120819020	120819040	+	0.000640612
chr4	123051980	123052000	+	0.000640612
chr4	123059440	123059460	+	0.000640612
chr4	123072360	123072380	+	6.9168e-05
chr4	123084780	123084800	+	6.01748e-06
chr4	123085200	123085220	+	1.70931e-06
chr4	123085340	123085360	+	0.000640612
chr4	123085460	123085480	+	6.9168e-05
chr4	123086480	123086500	+	6.01748e-06
chr4	123086760	123086800	+	0.000109461
chr4	123087220	123087240	+	0.000640612
chr4	123089060	123089080	+	6.9168e-05
chr4	125842620	125842640	+	2.08079e-05
chr4	125854680	125854700	+	0.000218793
chr4	125855620	125855640	+	6.9168e-05
chr4	125911700	125911720	+	2.08079e-05
chr4	125912260	125912280	+	6.01748e-06
chr4	125917960	125917980	+	6.01748e-06
chr4	125919260	125919280	+	6.01748e-06
chr4	128899800	128899820	+	0.000218793
chr4	128900140	128900180	+	0.000640612
chr4	128900240	128900260	+	0.000640612
chr4	131742760	131742780	+	0.000218793
chr4	131760340	131760360	+	0.000218793
chr4	131760720	131760780	+	0.000243529
chr4	131761500	131761520	+	6.9168e-05
chr4	132748320	132748340	+	0.000640612
chr4	133236840	133236860	+	2.08079e-05
chr4	133237040	133237060	+	0.000640612
chr4	133237140	133237160	+	0.000640612
chr4	133237240	133237260	+	0.000640612
chr4	133237380	133237400	+	0.000640612
chr4	133237460	133237480	+	0.000640612
chr4	133276500	133276520	+	6.9168e-05
chr4	134259240	134259260	+	0.000218793
chr4	134360200	134360220	+	6.9168e-05
chr4	134772780	134772800	+	2.08079e-05
chr4	134772960	134772980	+	0.000218793
chr4	134890740	134890760	+	0.000218793
chr4	135882600	135882620	+	6.9168e-05
chr4	140670460	140670480	+	6.9168e-05
chr4	141027280	141027300	+	0.000218793
chr4	141028600	141028620	+	0.000640612
chr4	141030140	141030160	+	2.08079e-05
chr4	141030700	141030720	+	0.000640612
chr4	141077240	141077260	+	0.000640612
chr4	141077480	141077500	+	2.08079e-05
chr4	141188120	141188140	+	2.08079e-05
chr4	141239880	141239900	+	6.9168e-05
chr4	141240640	141240660	+	6.9168e-05
chr4	141240760	141240780	+	1.70931e-06
chr4	142723540	142723560	+	0.000218793
chr4	142723700	142723720	+	2.08079e-05
chr4	142725880	142725900	+	0.000640612
chr4	142857660	142857680	+	0.000640612
chr4	142858100	142858120	+	0.000218793
chr4	142858160	142858180	+	1.29582e-07
chr4	144804380	144804400	+	0.000640612
chr4	144804640	144804660	+	0.000218793
chr4	144804680	144804740	+	0.000287038
chr4	144804900	144804920	+	0.000640612
chr4	148502560	148502580	+	0.000218793
chr4	148524400	148524420	+	2.08079e-05
chr4	148610020	148610040	+	6.9168e-05
chr4	148611900	148611920	+	6.9168e-05
chr4	149280840	149280880	+	0.000429702
chr4	149355060	149355100	+	0.00035489
chr4	149355580	149355600	+	0.000218793
chr4	151356920	151356940	+	0.000640612
chr4	154530740	154530760	+	0.000218793
chr4	154530900	154530920	+	0.000640612
chr4	154531340	154531360	+	2.08079e-05
chr4	154547820	154547840	+	6.9168e-05
chr4	154548160	154548180	+	0.000640612
chr4	154551400	154551420	+	0.000218793
chr4	154563180	154563200	+	6.01748e-06
chr4	154567880	154567900	+	0.000640612
chr4	154568240	154568280	+	0.00033071
chr4	154568680	154568700	+	0.000640612
chr4	154569380	154569400	+	6.9168e-05
chr4	154570640	154570680	+	0.00014398
chr4	154571980	154572000	+	6.9168e-05
chr4	154572360	154572400	+	0.000429702
chr4	154573840	154573860	+	0.000218793
chr4	154573940	154573980	+	1.04212e-05
chr4	154575020	154575040	+	0.000218793
chr4	154575060	154575080	+	6.01748e-06
chr4	154575860	154575880	+	0.000218793
chr4	154576800	154576820	+	0.000640612
chr4	154577160	154577180	+	0.000218793
chr4	154578400	154578420	+	0.000640612
chr4	154579540	154579560	+	6.01748e-06
chr4	154580100	154580160	+	0.000243529
chr4	154580780	154580800	+	0.000640612
chr4	154582220	154582240	+	2.08079e-05
chr4	154582360	154582380	+	2.08079e-05
chr4	154582520	154582540	+	6.01748e-06
chr4	154582580	154582600	+	0.000640612
chr4	154582640	154582660	+	6.9168e-05
chr4	154582760	154582780	+	0.000218793
chr4	154584080	154584100	+	1.70931e-06
chr4	154585100	154585120	+	0.000640612
chr4	154585460	154585480	+	1.29582e-07
chr4	154586020	154586040	+	6.9168e-05
chr4	154586120	154586140	+	6.01748e-06
chr4	154586680	154586700	+	6.9168e-05
chr4	154586780	154586820	+	0.000429702
chr4	154586900	154586920	+	1.70931e-06
chr4	154587240	154587260	+	1.70931e-06
chr4	154588540	154588560	+	2.08079e-05
chr4	154589060	154589080	+	0.000218793
chr4	154589180	154589200	+	0.000640612
chr4	154590020	154590040	+	2.08079e-05
chr4	154590900	154590920	+	0.000218793
chr4	154591140	154591160	+	0.000640612
chr4	154592700	154592720	+	0.000640612
chr4	154592900	154592920	+	0.000218793
chr4	154593920	154593940	+	0.000640612
chr4	154594220	154594240	+	2.08079e-05
chr4	154595760	154595780	+	0.000218793
chr5	4755540	4755560	+	1.70931e-06
chr5	4755580	4755600	+	4.76175e-07
chr5	4757200	4757240	+	0.000640612
chr5	20504000	20504020	+	0.000640612
chr5	31257440	31257460	+	6.01748e-06
chr5	31257780	31257800	+	0.000640612
chr5	31502920	31502940	+	0.000218793
chr5	31508480	31508500	+	0.000218793
chr5	36819360	36819380	+	0.000640612
chr5	36956340	36956360	+	0.000640612
chr5	37139380	37139400	+	0.000218793
chr5	37187020	37187040	+	6.01748e-06
chr5	37187720	37187740	+	1.70931e-06
chr5	37359340	37359380	+	0.000109401
chr5	37359460	37359480	+	6.01748e-06
chr5	38527260	38527280	+	0.000218793
chr5	38918960	38918980	+	0.000640612
chr5	38919100	38919120	+	2.08079e-05
chr5	44149680	44149700	+	6.9168e-05
chr5	44149960	44149980	+	0.000218793
chr5	50351960	50351980	+	0.000640612
chr5	64302000	64302020	+	0.000640612
chr5	66842840	66842860	+	0.000218793
chr5	66843280	66843300	+	6.01748e-06
chr5	90672360	90672380	+	2.08079e-05
chr5	98314440	98314460	+	0.000218793
chr5	98373840	98373860	+	0.000640612
chr5	100402520	100402540	+	6.9168e-05
chr5	100790980	100791000	+	0.000640612
chr5	100802640	100802660	+	2.08079e-05
chr5	107066740	107066760	+	0.000218793
chr5	107067320	107067340	+	6.9168e-05
chr5	107067380	107067400	+	0.000218793
chr5	107094340	107094360	+	0.000640612
chr5	107098560	107098580	+	0.000640612
chr5	107109940	107109960	+	6.01748e-06
chr5	108998940	108998960	+	6.9168e-05
chr5	114392680	114392700	+	0.000640612
chr5	115180160	115180180	+	6.9168e-05
chr5	115597320	115597340	+	0.000640612
chr5	115597660	115597680	+	0.000640612
chr5	115600960	115600980	+	0.000218793
chr5	117721780	117721800	+	6.9168e-05
chr5	120986080	120986100	+	0.000640612
chr5	121583960	121583980	+	2.08079e-05
chr5	121584040	121584060	+	6.01748e-06
chr5	121895380	121895400	+	6.9168e-05
chr5	124371820	124371840	+	6.9168e-05
chr5	125499260	125499280	+	6.9168e-05
chr5	125506720	125506740	+	0.000640612
chr5	125507400	125507420	+	0.000640612
chr5	125517700	125517720	+	2.08079e-05
chr5	125519260	125519280	+	0.000218793
chr5	125523140	125523160	+	0.000640612
chr5	125528660	125528680	+	6.01748e-06
chr5	125536320	125536340	+	6.9168e-05
chr5	125536740	125536760	+	0.000640612
chr5	125545480	125545500	+	2.08079e-05
chr5	125866460	125866480	+	1.70931e-06
chr5	125866500	125866560	+	0.000288474
chr5	125866580	125866620	+	1.04043e-05
chr5	125866640	125866700	+	0.000222479
chr5	125867780	125867840	+	0.000222479
chr5	134744280	134744300	+	0.000640612
chr5	134978920	134978960	+	0.000320371
chr5	136384980	136385000	+	2.08079e-05
chr5	136385060	136385100	+	0.000640612
chr5	136385240	136385260	+	0.000640612
chr5	136385460	136385500	+	0.000429702
chr5	136385720	136385760	+	0.00032116
chr5	136385880	136385900	+	1.29582e-07
chr5	136386120	136386140	+	6.9168e-05
chr5	136386300	136386320	+	6.9168e-05
chr5	136386340	136386360	+	0.000218793
chr5	136386580	136386600	+	0.000218793
chr5	136386960	136387000	+	0.00033071
chr5	136880220	136880240	+	0.000218793
chr5	138046340	138046400	+	1.58778e-05
chr5	138046460	138046480	+	0.000640612
chr5	138225900	138225920	+	0.000218793
chr5	138225960	138226000	+	0.00014398
chr5	138226400	138226420	+	2.08079e-05
chr5	138585800	138585820	+	0.000218793
chr5	139453120	139453140	+	0.000218793
chr5	141098980	141099000	+	0.000640612
chr5	141099080	141099100	+	2.08079e-05
chr5	141099320	141099360	+	2.08079e-05
[truncated: 3,359 more rows]

## Sheet: C2C12 YTHDC1-m6A gene
Supplementary Table S2. LACE-seq profiling of YTHDC1 binding in ASC and C2C12 myoblasts.
m6A-YTHDC1 binding genes in C2C12.
Chromosome	Begin	End	Name
chr9	54798666	54805837	Psma4
chr4	138748814	138847735	Capzb
chr15	10376518	10400271	Dnajc21
chr18	56722223	56747366	Phax
chr19	4214238	4233634	Gm45928
chr3	87710243	87720054	Hdgf
chr3	105507517	105523760	Inka2
chr11	102889857	102930222	Nmt1
chr5	3343893	3531005	Cdk6
chr6	120745262	120772716	Atp6v1e1
chr7	130114078	130146086	Rbbp6
chr18	37828581	38001524	Pcdhga2
chr10	80318020	80331453	Sppl2b
chr11	95685814	95693454	Phospho1
chr8	28087808	28091934	Zfp703
chr7	125628626	125635489	Itpripl2
chr17	34053121	34056270	Zbtb22
chr17	56551849	56615903	Ptprs
chr7	126115554	126138725	Gprc5b
chr2	25077678	25080222	Tubb4b
chr17	23960258	23960336	Mir5125
chr11	113545748	113555961	D11Wsu47e
chr11	33052498	33063206	Npm1
chr12	84973193	85024077	Rbm25
chr15	85690137	85707003	Gtse1
chr11	77499641	77531468	Nufip2
chr11	116106480	116135531	Srp68
chr17	66132695	66191266	Ppp4r1
chr9	106270963	106278054	Dusp7
chr17	46153943	46169326	Vegfa
chr4	9376232	9596491	Asph
chr12	58331412	58558228	Mipol1
chr19	3323301	3385733	Cpt1a
chr11	118193674	118203848	Cep295nl
chr4	155186598	155198652	Ccnl2
chr3	108394196	108448637	Wdr47
chr5	121580542	121641406	Ptpn11
chr11	69794670	69804102	Ctdnep1
chr5	136724005	137043360	Cux1
chr12	117285935	117301675	Zfp386
chr5	139451968	139470898	Pdgfa
chrX	20235428	20260305	Uba1
chr5	31501354	31504676	Zfp513
chr13	109444371	110746177	Pde4d
chr1	186551024	186556372	Hlx
chr19	5758427	5771419	Scyl1
chr16	65815434	65866613	Vgll3
chr7	52381717	52381805	Snord35a
chr5	64300137	64360136	Rell1
chr2	115687000	115893180	Meis2
chr13	23713646	23714427	H1f4
chr2	180701930	180717229	Arfgap1
chr14	77436579	77512070	Ccdc122
chr4	134117605	134260205	Man1c1
chr6	28430348	28838832	Snd1
chr10	118635868	118677111	Cand1
chr4	125909411	125933563	Map7d1
chr2	132075022	132078916	Pcna
chr18	31919478	31943737	Ammecr1l
chr3	88140182	88166259	Smg5
chr4	149353583	149383132	H6pd
chr1	138521478	138526968	Zfp281
chr1	78654400	78704318	Acsl3
chr10	40069114	40203624	Cdk19
chr4	120818488	120887689	Rlf
chr1	137662662	137665711	Phlda3
chr6	120881564	121081040	Mical3
chr17	57160472	57170930	Khsrp
chr10	128184935	128203624	Pym1
chr8	114060540	114149619	Znrf1
chr2	122174628	122194883	Shf
chr18	35721812	35751699	Matr3
chr18	52675714	52689521	Lox
chr5	140895259	140919312	Eif3b
chr1	72904639	72921439	Igfbp5
chr18	32687974	32719688	Gypc
chr4	114672723	114715803	Stil
chr9	103255432	103268110	Cdv3
chr15	101933365	101946832	Tns2
chr8	74743644	74748933	Fam32a
chr3	89518944	89557377	Adar
chr19	10055090	10059601	Fth1
chr15	10498733	10644386	Rai14
chr15	39702136	39775540	Lrp12
chr7	135390326	135399213	Tgfb1i1
chr13	58227240	58229917	Hnrnpa0
chr5	34712582	34829107	Fam193a
chr5	38430469	38529008	Stx18
chr17	46520715	46557867	Zfp318
chr14	22569753	22617948	Samd8
chr2	59450099	59684270	Tanc1
chr4	148550428	148681842	Kif1b
chr1	135516439	135557976	Zc3h11a
chr10	117125931	117147814	Mdm2
chr18	32227388	32263985	Iws1
chr19	12841429	12870613	Zfp91
chr17	6106830	6240637	Tulp4
chr13	16103684	16123442	Inhba
chr5	134965253	135028304	Clip2
chr11	116295408	116300391	Ubald2
chr15	77745481	77759424	Txn2
chr1	156943497	156946766	Ier5
chr1	90155431	90174154	Hjurp
chr14	31292751	31340242	Dcp1a
chr4	154865470	154933378	Gnb1
chr2	163161978	163223729	Jph2
chr17	34046390	34052535	Daxx
chr9	120842518	120869625	Ctnnb1
chr11	70833113	70840862	Mis12
chr11	54251681	54331743	Fnip1
chr6	86474474	86476183	Pcbp1
chr18	5046587	5119291	Svil
chr5	151402507	151468187	N4bp2l2
chr11	69547501	69572135	Polr2a
chr1	148342759	148749601	Brinp3
chr18	60753644	60783959	Synpo
chr8	73221638	73224515	Jund
chr12	106168143	106248019	Syne3
chr14	52780094	52816914	Supt16
chr3	87329500	87344080	Etv3
chr7	132695785	132722988	Il4ra
chr7	26006444	26012514	Zfp526
chr11	32542555	32646814	Fbxw11
chr8	28196313	28233908	Adgra2
chr8	32222299	32243790	Rnf122
chr15	85166685	85294267	Atxn10
chr13	105421220	105607033	Cwc27
chr14	73637698	73640165	Lpar6
chr3	95462643	95467101	Mcl1
chr8	98157459	98168959	Gins3
chr1	120285635	120506039	Clasp1
chr19	6046576	6053718	Syvn1
chr10	86153586	86168189	Hsp90b1
chr11	106641669	106650499	Ddx5
chr7	133245233	133344015	Xpo6
chr12	87397693	87419991	Tgfb3
chr19	21852830	21932850	Cemip2
chr5	142877451	142937969	Foxk1
chr18	33955981	34166860	Epb41l4a
chr10	127896371	127927645	Smarcc2
chr11	5420644	5425996	Xbp1
chr8	46593142	46913260	Sorbs2
chr1	171902438	172019075	Ddr2
chr7	86278654	86293946	Mfge8
chrX	98624990	98643932	Nono
chr1	135552456	135557462	Zbed6
chrX	50972343	50973614	Rtl8b
chr5	31171952	31179842	Tmem214
chr1	135599251	135650324	Atp2b4
chr11	49016794	49032318	Zfp62
chr17	5941280	6040191	Synj2
chr18	35278566	35414429	Ctnna1
chr15	78858642	78860930	H1f0
chr9	118415436	118491637	Golga4
chr4	147413186	147433671	Mthfr
chr16	8830193	8859017	1810013L24Rik
chr9	106786316	106789331	Rbm15b
chr8	87550732	87554190	Trir
chr3	30691798	30720185	Sec62
chr16	14361651	14474971	Abcc1
chr1	158260546	158351046	Axdnd1
chr5	116081996	116097167	Rab35
chr9	45773394	45820773	Pafah1b2
chr6	124692562	124706505	Atn1
chr11	61770265	62036515	Specc1
chr14	76814768	76907572	Tsc22d1
chr11	59475997	59594362	Mprip
chr14	67632893	67691308	Ppp2r2a
chr7	74376049	74517744	Mef2a
chr11	97897938	97914776	Stac2
chr11	74989445	74992310	Ovca2
chr8	23587172	23680088	Slc20a2
chr12	114198073	114238832	Brf1
chr18	34380638	34481844	Apc
chr6	67216973	67239296	Serbp1
chr8	74659187	74677041	Tpm4
chr19	5917556	5924816	Cdc42ep2
chr18	47404908	47528524	Sema6a
chr5	65194762	65221368	Klf3
chr15	25552305	25743426	Myo10
chr13	55694496	55699055	Tmed9
chr16	38089087	38246170	Gsk3b
chr1	12682511	12850453	Sulf1
chr5	21049345	21081720	Lrrc17
chr2	181099636	181115498	Zgpat
chr9	7932001	8004596	Yap1
chr14	32454243	32481383	Btd
chr10	79843100	79850396	Mex3d
chr18	37906670	38001524	Pcdhga10
chrX	148237825	148369961	Huwe1
chr2	104670898	104690007	Prrg4
chr10	69559869	69655948	Ccdc6
chr15	87374729	87589794	Tafa5
chr7	109387637	109398632	Rhog
chr4	21775195	21803622	Pnisr
chr2	152495197	152534404	H13
chr7	87331727	87371410	Sema4b
chr7	16523185	16531457	Nop53
chr4	135866857	135901894	Hnrnpr
chr11	69579414	69597528	Zbtb4
chr9	20299513	20325863	Zfp266
chr11	6446890	6496764	Ccm2
chr7	29666675	29678604	Capn12
chr8	13338751	13378448	Tfdp1
chr6	91162758	91222534	Fbln2
chr19	5041363	5049912	Brms1
chr8	72430968	72520283	Gatad2a
chr9	123387819	123430670	Limd1
chr11	98064619	98114854	Cdk12
chr9	107516456	107537674	Gnai2
chr8	86423997	86465853	Adgrl1
chr18	37979200	38001526	Pcdhgc5
chr4	106233643	106261718	Dhcr24
chr9	44494391	44543281	Phldb1
chr19	41557172	41670650	Lcor
chr5	33361465	33370615	Ywhah
chr13	55423416	55426633	Prelid1
chr2	92755258	92796208	Syt13
chr9	58004071	58007028	Islr
chr11	117060975	117223639	Septin9
chr15	84753858	84773393	Nup50
chr10	80364108	80380990	Lmnb2
chr9	59236361	59334181	Arih1
chr8	118227153	118230794	Maf
chr13	38592140	38620693	Txndc5
chr1	40281925	40373022	Il1r1
chr11	69156775	69182928	Chd3
chr6	124758679	124760634	Spsb2
chr15	6658381	6750400	Rictor
chr19	8967477	8972380	Ints5
chr12	21329370	21379493	Adam17
chr12	30622901	30702523	Pxdn
chr15	12754570	12865046	Drosha
chr7	134985322	134992479	Stx4a
chr2	44839032	44972962	Zeb2
chr3	75680105	75760871	Golim4
chr2	163899874	163981260	Stk4
chr2	127073684	127086844	Tmem127
chr13	23444972	23461077	Zfp322a
chr18	37133456	38001526	Gm38667
chr2	181336024	181390366	Prpf6
chr2	144194768	144233411	Kat14
chr11	114536782	114582298	Ttyh2
chr5	151840090	151992768	Stard13
chr12	96930436	97023423	Flrt2
chr2	121973423	121978818	B2m
chr11	71856004	71860872	Pimreg
chr2	32006668	32090057	Prrc2b
chr5	108329547	108338024	Rpl5
chr15	73553575	73589196	Ptp4a3
chr10	79689343	79707889	Pwwp3a
chr10	80506816	80523016	Sgta
chr11	70514050	70545472	Kif1c
chr16	55900001	55934961	Cep97
chr3	32335073	32367408	Pik3ca
chr7	5013745	5031547	U2af2
chr2	167514415	167515932	Cebpb
chr1	189039390	189175308	Gpatch2
chr5	124889939	124912320	Kmt5a
chr6	38383925	38462763	Ubn2
chr1	72757834	72760387	Rpl37a
chr10	11001128	11017767	Fbxo30
chr19	4756525	4765940	Rbm4b
chr7	13609501	13616381	Trim28
chr2	155643468	155644939	BC029722
chrX	67596245	67618260	Ids
chr2	158593835	158612373	Fam83d
chr19	30638977	31839523	Prkg1
chr19	46673596	46731879	Wbp1l
chr15	102236747	102266835	Sp1
chr11	117670981	117675600	Syngr2
chr8	86132074	86136552	Dnajb1
chr3	126066770	126143292	Arsj
chr19	4510472	4621752	Pcx
chr5	98313707	98460036	Antxr2
chr10	79256317	79283641	Palm
chr5	93032077	93035605	Stbd1
chr10	82296696	82360469	Txnrd1
chr2	151931260	151937112	Srxn1
chr1	9708703	9738463	Vcpip1
chr2	122506969	122528399	Slc30a4
chr14	26278671	26486229	Zmiz1
chr19	46576138	46590945	Trim8
chr3	152009442	152056578	Usp33
chr1	130484776	130488876	Cxcr4
chr17	73267645	73291286	Lbh
chr1	62749891	62865266	Nrp2
chr5	58109320	58524474	Pcdh7
chr17	83901257	83913673	Cox7a2l
chr12	71065999	71087989	Sav1
chr4	4689631	4720453	Impad1
chr16	5050150	5086382	Ubn1
chr13	55311143	55419686	Nsd1
chr2	131003025	131005803	Cenpb
chr3	142453866	142544968	Pkn2
chr3	65332369	65359440	Tiparp
chr2	169934143	169968175	Zfp217
chr15	103174718	103197222	Itga5
chr7	96656293	96675697	Prss23
chr18	6024448	6136096	Arhgap12
chr10	75495357	75505714	Zfp280b
chr2	174109821	174172243	Gnas
chr11	23206895	23390560	Usp34
chr3	67696142	68430404	Iqschfp
chr2	179646851	179711351	Taf4
chr4	109125462	109149110	Rnf11
chr17	27054036	27069524	Kifc5b
chr1	92500000	92509916	Cops8
chr18	84181019	84257100	Tshz1
chr16	84972456	84979696	Gm10791
chr6	83115918	83150111	Dctn1
chr15	57925602	57966637	Atad2
chr16	57302113	57606980	Cmss1
chr12	13226113	13255980	Ddx1
chr11	93720557	93747080	Utp18
chr7	134335174	134339591	Cd2bp2
chr16	11203476	11225889	2610020C07Rik
chr10	110910283	110935206	Nap1l1
chr5	112705765	112744376	Tpst2
chr4	130219236	130337481	Pum1
chr13	74830742	74946208	Cast
chr2	50985959	51004631	Rnd3
chr7	133920489	133924028	Ypel3
chr1	74283091	74314783	Arpc2
chr4	131455393	131475944	Gm12992
chr11	117710551	117717057	Birc5
chr12	103521284	103629064	Rin3
chr11	62062486	62079954	Adora2b
chr4	122960154	122976168	Pabpc4
chr15	79654328	79664763	Cbx6
chr8	126755294	126869622	Galnt2
chr14	79987467	80030604	Sugt1
chr11	75254445	75268219	Wdr81
chr14	62221673	62301210	Dleu2
chr19	46107080	46119801	Ldb1
chr16	45382248	45409166	Cd200
chr3	86882514	86978669	Kirrel
chr11	77994437	77997086	Rpl23a
chr15	78673077	78681332	Cdc42ep1
chr13	98521067	98530918	Rps18-ps4
chr11	99070362	99092331	Smarce1
chr11	23156041	23197597	Xpo1
chr8	112195221	112217194	Ist1
chr3	5218554	5415855	Zfhx4
chr11	70457529	70460541	Slc25a11
chr2	162757244	162762856	Srsf6
chr1	157882794	157915989	Tor1aip2
chr12	113826978	113853768	Inf2
chr3	134875527	134936504	Cenpe
chr15	57701057	57723973	Derl1
chr11	44332458	44379022	Rnf145
chr3	127509925	127540441	Ap1ar
chr7	135110993	135125545	Fus
chr5	121894762	121902483	Erp29
chr10	79855284	79862276	Mbd3
chr19	12660358	12671056	A330040F15Rik
chr7	5031837	5049780	Epn1
chr14	56472952	56493573	Nynrin
chr3	90052114	90057534	Slc39a1
chr11	102977639	102981038	Hexim1
chr1	108434753	108610867	Bcl2
chr1	59538991	59543799	Fzd7
chr6	34253934	34267443	Gm6644
chr7	112702874	112706903	Smpd1
chr9	56048936	56265857	Peak1
chr15	101904204	101927604	Eif4b
chr12	33063654	33067808	Ccdc71l
chr8	110104280	110112382	Psmd7
chr5	143664794	143668433	Actb
chr2	117937612	117952869	Thbs1
chr4	149611306	149622982	Eno1
chr7	149646717	149680773	Lsp1
chr6	119382549	119494365	Wnt5b
chr11	74991145	75003985	Dph1
chr12	72116954	72200338	Arid4a
chr1	73956806	74171122	Tns1
chr9	21571217	21602990	Kank2
chr7	148653261	148657380	Cd151
chr9	108393007	108404668	Usp19
chr10	116507183	116585530	Frs2
chr16	84954681	85173952	App
chr13	64463198	64471828	Ctsl
chr3	145309935	145312949	Ccn1
chr6	115904829	115945023	Plxnd1
chr3	122779437	122939067	Synpo2
chr7	82600420	82899495	Akap13
chr8	113245376	113265301	Mtss2
chr9	108382193	108392861	Lamb2
chr1	6204743	6266185	Rb1cc1
chrX	148667770	148713642	Kdm5c
chr9	65756817	65892821	Csnk1g1
chr8	10984681	11008929	Irs2
chr5	54389762	54512296	Stim2
chr15	81977699	82035390	Srebf2
chr6	71859047	71929355	Polr1a
chr18	61856491	61867289	Pcyox1l
chr1	158488918	158579750	Abl2
chr10	25079604	25243324	Epb41l2
chr1	92895304	93025521	Lrrfip1
chr10	79755176	79756859	Rps15
chr7	91032376	91048821	Mesd
chr2	163484122	163551894	Pkig
chr18	83080271	83174706	Zfp516
chr7	29595909	29607285	Hnrnpl
chr4	57858120	57909856	Akap2
chr1	90594801	90598766	Arl4c
chr16	17797375	17808386	Scarf2
chr3	122122675	122233109	Bcar3
chr19	34996848	35050240	Kif20b
chr16	36885097	36933171	Golgb1
chr3	89222473	89233951	Shc1
chr17	28726533	28759466	Srpk1
chr10	52056830	52101930	Gopc
chr11	60745556	60766313	Map2k3
chr2	30700887	30736767	Prrx2
chr11	88767242	88797375	Scpep1os
chr2	153171566	153229743	Asxl1
chr4	148524100	148540814	Pgd
chr2	30328161	30329719	Ier5l
chr19	10680087	10704318	Ddb1
chr17	89025895	89045064	Ston1
chr8	82163575	82201654	Otud4
chr2	164825857	164860279	Ncoa5
chr8	63990228	64381504	Palld
chr11	82577847	82581124	Zfp830
chr6	119873987	119988673	Wnk1
chr8	4259731	4275905	Timm44
chr7	17579251	17582864	Ccdc8
chr1	92663435	92740548	Col6a3
chr11	62633755	62656450	Trim16
chr10	79221260	79229697	Rnf126
chr2	164611521	164618270	Snx21
chr8	73419658	73419755	Snora68
chr12	86451783	86475041	Dlst
chr7	6658671	6683130	Peg3
chr13	70727567	70776512	Ice1
chr5	139676591	139725793	Sun1
chr17	88840044	88889873	Foxn2
chr14	21554095	21613310	Camk2g
chr17	34248964	34259552	Brd2
chr4	118781350	118809934	Slc2a1
chr12	113960385	113984802	Cep170b
chr16	96213699	96304035	Brwd1
chr17	32458369	32487522	Akap8l
chr11	102165874	102182176	Ubtf
chr2	34659884	34681755	Fbxw2
chr4	131740831	131768171	Ythdf2
chr13	34218877	34222223	Tubb2b
chr16	11216334	11254418	Gspt1
chr14	55126019	55136307	Prmt5
chr5	148241732	148360077	Pan3
chr5	130007106	130077259	Sfswap
chr11	74487451	74537886	Pafah1b1
chr4	137150087	137214452	Usp48
chr19	5425144	5427316	AI837181
chr15	98860322	98868536	Tuba1c
chr4	41141348	41222168	Ubap2
chr4	134876400	134909061	Srrm1
chr16	17152108	17201585	Ube2l3
chr7	29144623	29157681	Plekhg2
chr12	88646008	88729305	Sptlc2
chr18	38356348	38369416	Pcdh1
chr12	78038256	78063235	Max
chr11	110927478	110938139	Kcnj2
chr6	34972065	35083737	Cnot4
chr15	85969531	86016571	Cerk
chr12	58331399	58343155	Prps1l3
chr6	115968636	116143392	Tmcc1
chr13	89794915	89882117	Vcan
chr16	44173510	44227578	Usf3
chr7	30971953	30980172	Capns1
chr9	108107192	108166289	Dag1
chr2	152584468	152656453	Bcl2l1
chr10	80639376	80645254	Eef2
chr4	140668893	140695711	Szrd1
chr15	81416644	81482507	Ep300
chr19	47806246	47810078	Sfr1
chr1	33965070	34365507	Dst
chr4	155366952	155387719	Sdf4
chr8	111238544	111485536	Zfhx3
chr15	103070885	103075386	Gm5643
chr19	46072627	46087876	4930505N22Rik
chr5	108998126	109058796	Gak
chr13	34009787	34094663	Serpinb6a
chr5	37357343	37380221	Wfs1
chr11	102660792	102681000	Gjc1
chr11	105451300	105790617	Tanc2
chr15	76473825	76490638	Cyhr1
chr11	4380871	4494818	Mtmr3
chr14	73595309	73725629	Rb1
chr13	51942044	51943843	Gadd45g
chr4	46463798	46485528	Anp32b
chr6	147995938	148131280	Far2
chr3	148478550	148617599	Adgrl2
chrX	12648624	12750453	Usp9x
chr5	22940282	23010051	Kmt2e
chr3	110049022	110053917	Prmt6
chr2	18598645	18608256	Bmi1
chr16	4594713	4615957	Glis2
chr7	6659471	6660335	Peg3os
chr1	155066052	155179916	Lamc1
chr2	20769546	20889348	Arhgap21
chr7	19669198	19679169	Dmpk
chr2	121945844	122011925	Patl2
chr17	79733065	79754431	Cdc42ep3
chr6	85401499	85418471	Cct7
chr7	52071740	52096173	Il4i1b
chr7	19661549	19668124	Dmwd
chr4	136025676	136105233	Luzp1
chr2	29745240	29787266	Odf2
chr1	88439587	88479360	Pde6d
chr17	68192048	68353448	Arhgap28
chr10	45009111	45038256	Popdc3
chr4	149656025	149996075	Rere
chr16	92601711	92826319	Runx1
chr6	34548504	34725469	Cald1
chr16	56690442	56717563	Tfg
chr17	69425017	69639327	Epb41l3
chr3	88335868	88345316	Mex3a
chr1	71632047	71699808	Fn1
chr15	12251251	12281022	Golph3
chr5	124027803	124134370	Clip1
chr19	4742913	4811599	Gm21992
chrX	71271931	71331029	Mecp2
chr7	72441051	72516130	Tjp1
chr5	37186106	37187993	Mrfap1
chr4	132686548	132754245	Wasf2
chr16	8658680	8672246	Carhsp1
chr2	152561987	152563146	Id1
chr9	107904979	107951113	Ip6k1
chr11	120439413	120442938	Arhgdia
chr5	135663193	135721999	Baz1b
chr8	125372274	125391297	Cdh15
chrX	159198304	159217022	Rbbp7
chr13	59873240	59924508	Tut7
chr3	90016589	90017570	Rps27
chr6	124760606	124764176	Tpi1
chr5	20492463	20561729	Ptpn12
chr9	56266426	56344743	Hmg20a
chr16	95924014	95942656	Ets2
chr9	59504175	59527182	Pkm
[truncated: 1,230 more rows]
