# Supplementary material for: Nuclear m6A Reader YTHDC1 Promotes Muscle Stem Cell Activation/Proliferation by Regulating mRNA Splicing and Nuclear Export
Source: bioRxiv preprint, doi:10.1101/2022.08.07.503064, version 1 (2022-08-07)
Supplement: suppl table S4 [file 503064_file09.xlsx]

## Sheet: SC targets
Supplementary Table S4. Analysis of YTHDC1 mRNA nuclear export in ASC and C2C12 myoblasts
Cyto/Nuc ratio of all expressed mRNAs in YTHDC1 iKO vs. Ctrl ASC.
Ctrl							iKO
chr	start	end	gene	nuc FPKM	cyto FPKM	log2(cyto/nuc)	chr	start	end	gene	nuc FPKM	cyto FPKM	log2(cyto/nuc)
chr11	51498886	51502136	0610009B22Rik	13.9391	44.0194	1.659	chr11	51498886	51502136	0610009B22Rik	4.88752	12.4178	1.34524
chr2	26301443	26359342	0610009E02Rik	15.9409	13.106	-0.282506	chr2	26301443	26359342	0610009E02Rik	22.1161	0.469596	-5.55753
chr11	120209991	120212504	0610009L18Rik	6.90625	5.68662	-0.280332	chr11	120209991	120212504	0610009L18Rik	1.14068	4.25424	1.89901
chr11	23464948	23533631	0610010F05Rik	5.41042	5.34263	-0.0181907	chr11	23464948	23533631	0610010F05Rik	9.22222	4.23154	-1.12393
chr11	70048705	70051416	0610010K14Rik	36.9632	110.137	1.57514	chr11	70048705	70051416	0610010K14Rik	24.0582	35.9613	0.579916
chr16	31947135	31948591	0610012G03Rik	9.2395	41.8998	2.18106	chr16	31947135	31948591	0610012G03Rik	5.24449	25.6844	2.29202
chr6	72297310	72303154	0610030E20Rik	15.5902	3.58841	-2.11923	chr6	72297310	72303154	0610030E20Rik	9.72496	4.44019	-1.13107
chr5	144090986	144094383	0610040B10Rik	2.31009	3.87754	0.747195	chr5	144090986	144094383	0610040B10Rik	3.63049	1.97207	-0.880455
chr3	137711724	137744463	1110002E22Rik	50.1863	10.8798	-2.20564	chr3	137711724	137744463	1110002E22Rik	21.8087	14.5237	-0.586497
chr12	3363508	3426747	1110002L01Rik	6.07033	3.90449	-0.636642	chr12	3363508	3426747	1110002L01Rik	1.94885	5.46993	1.4889
chr7	123236893	123248724	1110004F10Rik	43.1354	131.25	1.60538	chr7	123236893	123248724	1110004F10Rik	23.745	38.537	0.69862
chr5	116081057	116081825	1110006O24Rik	1.96074	5.02272	1.35707	chr5	116081057	116081825	1110006O24Rik	3.60074	12.2768	1.76957
chr2	32234620	32237435	1110008P14Rik	26.1327	121.331	2.21503	chr2	32234620	32237435	1110008P14Rik	27.5107	41.1457	0.580752
chrX	67639087	67642591	1110012L19Rik	4.98266	19.2621	1.95078	chrX	67639087	67642591	1110012L19Rik	2.23756	7.72901	1.78836
chr9	50569478	50576289	1110032A03Rik	6.81231	1.90661	-1.83714	chr9	50569478	50576289	1110032A03Rik	1.31913	3.97511	1.5914
chr17	35087180	35089416	1110038B12Rik	347.288	244.031	-0.50907	chr17	35087180	35089416	1110038B12Rik	271.365	375.451	0.468394
chr15	76778690	76781409	1110038F14Rik	25.1718	33.0372	0.392284	chr15	76778690	76781409	1110038F14Rik	27.8715	31.3705	0.170617
chr13	34009786	34127039	1110046J04Rik	13.6903	8.99296	-0.606286	chr13	34009786	34127039	1110046J04Rik	12.9616	11.7002	-0.14771
chr2	91105271	91284871	1110051M20Rik	9.59637	13.7105	0.514718	chr2	91105271	91284871	1110051M20Rik	12.9528	10.5282	-0.299009
chr19	21671802	21727281	1110059E24Rik	6.76034	43.1811	2.67523	chr19	21671802	21727281	1110059E24Rik	4.95083	8.6067	0.797791
chr9	122854206	122860118	1110059G10Rik	2.51026	5.80285	1.20893	chr9	122854206	122860118	1110059G10Rik	1.29933	4.92704	1.92295
chr4	124479792	124527974	1110065P20Rik	10.1291	61.653	2.60567	chr4	124479792	124527974	1110065P20Rik	28.7943	6.0356	-2.25421
chr8	123132499	123192042	1190005I06Rik	12.2071	0.252003	-5.59813	chr8	123132499	123192042	1190005I06Rik	1.66158	0.69617	-1.25504
chr10	82082595	82085973	1190007I07Rik	3.33863	18.9746	2.50674	chr10	82082595	82085973	1190007I07Rik	3.45001	11.9453	1.79177
chr16	21794419	21809112	1300002E11Rik	5.48467	22.0521	2.00744	chr16	21794419	21809112	1300002E11Rik	4.79628	4.00613	-0.259706
chr3	88580978	88636469	1500004A13Rik	5.92794	0.55207	-3.42461	chr3	88580978	88636469	1500004A13Rik	3.53261	0.850757	-2.05392
chr5	115258204	115263985	1500011B03Rik	16.5693	18.4312	0.153638	chr5	115258204	115263985	1500011B03Rik	11.8604	31.6508	1.4161
chr18	61886043	61887907	1500015A07Rik	8.53994	2.98326	-1.51733	chr18	61886043	61887907	1500015A07Rik	5.35569	4.65894	-0.20107
chr17	15080188	15098237	1600012H06Rik	20.5009	11.1314	-0.88105	chr17	15080188	15098237	1600012H06Rik	17.4762	12.8471	-0.443957
chr7	38968235	38982584	1600014C10Rik	2.66546	3.45409	0.37392	chr7	38968235	38982584	1600014C10Rik	1.63258	1.19812	-0.446378
chr6	86477323	86514443	1600020E01Rik	25.0491	4.06746	-2.62256	chr6	86477323	86514443	1600020E01Rik	34.6781	12.8861	-1.42821
chr2	154370140	154384589	1700003F12Rik	1.00581	0.801886	-0.326884	chr2	154370140	154384589	1700003F12Rik	1.92412	0.410122	-2.23007
chr2	28317520	28321844	1700007K13Rik	2.63015	8.33841	1.66463	chr2	28317520	28321844	1700007K13Rik	10.3939	5.40107	-0.944417
chr16	33379939	33380822	1700007L15Rik	0.888574	7.08345	2.99489	chr16	33379939	33380822	1700007L15Rik	0.145989	1.20005	3.03917
chr7	134653951	134704733	1700008J07Rik	4.36454	2.31326	-0.9159	chr7	134653951	134704733	1700008J07Rik	2.45041	0.7038	-1.79978
chr9	14562637	14575474	1700012B09Rik	5.08481	11.7915	1.21349	chr9	14562637	14575474	1700012B09Rik	6.90394	15.4392	1.16111
chr9	57100128	57110406	1700017B05Rik	9.43815	11.523	0.287947	chr9	57100128	57110406	1700017B05Rik	11.2087	9.07234	-0.305078
chr11	83251195	83276542	1700020L24Rik	3.1685	0.150846	-4.39265	chr11	83251195	83276542	1700020L24Rik	1.07382	0.884229	-0.280254
chr19	8815913	8831459	1700023D09Rik	1.21218	0.249844	-2.2785	chr19	8815913	8831459	1700023D09Rik	0.922839	2.81827	1.61066
chr1	153731653	153937450	1700025G04Rik	3.35052	2.36607	-0.50189	chr1	153731653	153937450	1700025G04Rik	0.980372	1.95122	0.992976
chr5	107963738	108090872	1700028K03Rik	2.10984	0.0353913	-5.89759	chr5	107963738	108090872	1700028K03Rik	1.6782	0.864589	-0.956825
chr8	13550721	13562461	1700029H14Rik	2.39921	0.0346438	-6.11382	chr8	13550721	13562461	1700029H14Rik	3.11242	0.740708	-2.07106
chr8	47038955	47060606	1700029J07Rik	6.40723	0.805314	-2.99208	chr8	47038955	47060606	1700029J07Rik	5.93855	1.8563	-1.67768
chr8	74967778	74999132	1700030K09Rik	7.51448	3.65273	-1.0407	chr8	74967778	74999132	1700030K09Rik	12.0451	8.13742	-0.565806
chr2	130972050	130985817	1700037H04Rik	25.2081	68.4672	1.44152	chr2	130972050	130985817	1700037H04Rik	29.9009	27.5163	-0.1199
chr9	121846392	121856134	1700048O20Rik	2.70523	2.81582	0.0578026	chr9	121846392	121856134	1700048O20Rik	4.12945	4.96206	0.264987
chr11	105040120	105145273	1700052K11Rik	1.73324	2.72879	0.654787	chr11	105040120	105145273	1700052K11Rik	1.80268	1.41038	-0.354062
chr1	185856910	185857877	1700056E22Rik	3.9987	4.49602	0.169117	chr1	185856910	185857877	1700056E22Rik	1.55795	12.594	3.01501
chr1	57434463	57442266	1700066M21Rik	5.69468	5.60536	-0.0228065	chr1	57434463	57442266	1700066M21Rik	3.17391	2.30413	-0.46204
chr2	30092717	30093151	1700084E18Rik	0.238304	3.39372	3.83199	chr2	30092717	30093151	1700084E18Rik	11.0212	7.1197	-0.630399
chr18	38398058	38422283	1700086O06Rik	10.4329	3.42668	-1.60625	chr18	38398058	38422283	1700086O06Rik	4.17311	6.90157	0.7258
chr3	89802681	89872269	1700094D03Rik	5.61606	1.00369	-2.48424	chr3	89802681	89872269	1700094D03Rik	14.9009	10.46	-0.51052
chr3	87946293	87981707	1700113A16Rik	0.870096	3.74262	2.1048	chr3	87946293	87981707	1700113A16Rik	3.32393	16.9539	2.35065
chr14	55260997	55309579	1700123O20Rik	11.6102	29.1444	1.32783	chr14	55260997	55309579	1700123O20Rik	6.13463	12.1623	0.987367
chr19	8958367	8965249	1810009A15Rik	61.4248	320.702	2.38434	chr19	8958367	8965249	1810009A15Rik	60.6821	101.739	0.745528
chr11	106887182	106891756	1810010H24Rik	5.17263	0.212882	-4.60277	chr11	106887182	106891756	1810010H24Rik	1.98196	2.56508	0.372075
chr16	8830192	8859017	1810013L24Rik	16.9655	10.8738	-0.641745	chr16	8830192	8859017	1810013L24Rik	9.76372	11.0448	0.177868
chr10	86148271	86152699	1810014B01Rik	3.80756	2.74247	-0.473393	chr10	86148271	86152699	1810014B01Rik	1.57345	1.18586	-0.407989
chr7	80571537	80703281	1810026B05Rik	13.5536	2.83655	-2.25646	chr7	80571537	80703281	1810026B05Rik	10.8524	6.91879	-0.649426
chrX	12232007	12250765	1810030O07Rik	25.6267	14.5894	-0.812729	chrX	12232007	12250765	1810030O07Rik	23.7443	16.7347	-0.504736
chr13	64293852	64376296	1810034E14Rik	1.75411	0.960927	-0.868237	chr13	64293852	64376296	1810034E14Rik	0.737434	1.31288	0.832149
chr3	122627314	122629112	1810037I17Rik	40.7154	132.98	1.70757	chr3	122627314	122629112	1810037I17Rik	17.8872	92.8454	2.3759
chr19	3708292	3717882	1810055G02Rik	24.021	32.1384	0.420001	chr19	3708292	3717882	1810055G02Rik	29.1627	19.893	-0.551866
chr6	35202698	35212059	1810058I24Rik	25.0513	57.7709	1.20546	chr6	35202698	35212059	1810058I24Rik	12.4017	26.7549	1.10927
chr11	57609000	57614969	2010001A14Rik	0.859139	1.37597	0.67948	chr11	57609000	57614969	2010001A14Rik	0.421816	1.93266	2.1959
chrX	6988942	7000114	2010204K13Rik	15.7261	38.0291	1.27395	chrX	6988942	7000114	2010204K13Rik	4.81083	24.1141	2.32552
chr9_random	202786	223677	2010315B03Rik	7.89979	2.14247	-1.88254	chr9_random	202786	223677	2010315B03Rik	3.34531	1.46148	-1.19471
chr8	73300760	73301505	2010320M18Rik	7.88172	16.2094	1.04025	chr8	73300760	73301505	2010320M18Rik	14.0567	23.6567	0.750992
chr13	58481406	58486586	2210016F16Rik	6.90744	15.0757	1.12601	chr13	58481406	58486586	2210016F16Rik	3.46253	7.13837	1.04377
chr5	115392210	115398549	2210016L21Rik	19.0954	34.0852	0.835921	chr5	115392210	115398549	2210016L21Rik	24.6931	19.2797	-0.357027
chr12	74649469	74652973	2210039B01Rik	9.63488	0.600542	-4.00393	chr12	74649469	74652973	2210039B01Rik	2.99972	0.509859	-2.55666
chr5	36790259	36807503	2210406O10Rik	3.33797	1.11743	-1.57879	chr5	36790259	36807503	2210406O10Rik	0.09077	2.47541	4.76931
chr6	31170350	31287394	2210408F21Rik	0.626448	3.38236	2.43276	chr6	31170350	31287394	2210408F21Rik	4.56782	7.72665	0.758338
chr11	87911559	88025009	2210416O15Rik	3.76819	0.262218	-3.84503	chr11	87911559	88025009	2210416O15Rik	4.63193	2.90892	-0.67113
chr9	63242253	63247051	2300009A05Rik	8.31914	27.1901	1.70858	chr9	63242253	63247051	2300009A05Rik	9.28722	20.7939	1.16284
chr6	129182640	129188500	2310001H17Rik	11.5472	3.75786	-1.61956	chr6	129182640	129188500	2310001H17Rik	3.88755	20.5996	2.40569
chr1	140748555	140753431	2310009B15Rik	17.1493	46.3843	1.43549	chr1	140748555	140753431	2310009B15Rik	4.6114	6.06652	0.395665
chr10	79758700	79783293	2310011J03Rik	13.8028	31.3708	1.18446	chr10	79758700	79783293	2310011J03Rik	8.35544	12.2393	0.550734
chr7	28338298	28367117	2310022A10Rik	22.2522	29.1451	0.389307	chr7	28338298	28367117	2310022A10Rik	26.7144	21.777	-0.294813
chr8	127159655	127187269	2310022B05Rik	7.67626	33.1556	2.11078	chr8	127159655	127187269	2310022B05Rik	5.79235	17.7661	1.61691
chr9	50547795	50554632	2310030G06Rik	14.4443	3.1199	-2.21093	chr9	50547795	50554632	2310030G06Rik	19.6842	9.31204	-1.07987
chr11	59021862	59024236	2310033P09Rik	31.0818	35.9143	0.208488	chr11	59021862	59024236	2310033P09Rik	37.1849	35.6786	-0.0596589
chr19	46422690	46423478	2310034G01Rik	4.47307	1.38326	-1.69319	chr19	46422690	46423478	2310034G01Rik	2.06028	2.95988	0.522699
chr17	46909583	46910356	2310039H08Rik	18.942	38.4267	1.02052	chr17	46909583	46910356	2310039H08Rik	12.1106	12.5442	0.0507407
chr7	138485124	138506240	2310057M21Rik	4.84468	6.19307	0.354253	chr7	138485124	138506240	2310057M21Rik	5.03115	4.05448	-0.311371
chr17	36029621	36034323	2310061I04Rik	27.6506	33.7609	0.288042	chr17	36029621	36034323	2310061I04Rik	29.4561	19.8137	-0.572066
chr15	99800495	99846789	2310068J16Rik	17.247	0.973547	-4.14695	chr15	99800495	99846789	2310068J16Rik	1.08157	1.61564	0.578979
chr7	51502091	51507689	2410002F23Rik	133.063	45.006	-1.56392	chr7	51502091	51507689	2410002F23Rik	153.551	99.7045	-0.622988
chr3	145600977	145607793	2410004B18Rik	14.874	22.3954	0.590408	chr3	145600977	145607793	2410004B18Rik	16.6806	19.8787	0.25305
chr11	62416378	62418308	2410006H16Rik	327.777	368.035	0.167125	chr11	62416378	62418308	2410006H16Rik	379.654	427.982	0.172863
chr14	57430825	57432736	2410022M11Rik	2.72218	1.99311	-0.449742	chr14	57430825	57432736	2410022M11Rik	1.182	1.3514	0.193222
chr5	118695235	118713123	2410131K14Rik	4.6626	6.43352	0.464474	chr5	118695235	118713123	2410131K14Rik	2.37033	5.2274	1.14101
chr8	59966759	59989059	2500002B13Rik	6.72343	4.23232	-0.667748	chr8	59966759	59989059	2500002B13Rik	3.55361	3.21332	-0.145217
chr2	153166892	153171546	2500004C02Rik	6.54424	2.40747	-1.44271	chr2	153166892	153171546	2500004C02Rik	1.63837	1.23729	-0.405082
chr16	18836672	18840206	2510002D24Rik	21.6878	12.9174	-0.74757	chr16	18836672	18840206	2510002D24Rik	33.2489	18.102	-0.877158
chr16	21649117	21694738	2510009E07Rik	7.5285	5.64218	-0.41611	chr16	21649117	21694738	2510009E07Rik	1.92278	3.91893	1.02727
chr4	147315003	147321423	2510039O18Rik	13.6988	28.6057	1.06226	chr4	147315003	147321423	2510039O18Rik	12.1458	8.23716	-0.560243
chr6	13817734	13821518	2610001J05Rik	6.48036	24.0234	1.8903	chr6	13817734	13821518	2610001J05Rik	5.04484	19.4867	1.94961
chrX	104978090	105068250	2610002M06Rik	1.71592	3.6394	1.08472	chrX	104978090	105068250	2610002M06Rik	1.32735	1.49941	0.175845
chr8	19981359	20020392	2610005L07Rik	5.40494	0.706479	-2.93556	chr8	19981359	20020392	2610005L07Rik	6.08621	2.55659	-1.25132
chr10	78527118	78560345	2610008E11Rik	12.0888	3.12062	-1.95377	chr10	78527118	78560345	2610008E11Rik	10.0495	5.52678	-0.86262
chr16	11203475	11254418	2610020C07Rik	5.30022	1.03275	-2.35956	chr16	11203475	11254418	2610020C07Rik	3.07722	2.35064	-0.388572
chr11	112905219	113063152	2610035D17Rik	0.938549	1.79526	0.935685	chr11	112905219	113063152	2610035D17Rik	1.65154	0.383127	-2.10792
chr17	95149439	95234160	2610044O15Rik8	15.3617	6.20456	-1.30794	chr17	95149439	95234160	2610044O15Rik8	7.83304	4.18333	-0.904922
chr4	10801644	10826570	2610301B20Rik	10.6838	8.48831	-0.331878	chr4	10801644	10826570	2610301B20Rik	13.8002	14.3923	0.060611
chr6	86798400	86799434	2610306M01Rik	2.47699	4.43636	0.840791	chr6	86798400	86799434	2610306M01Rik	0.620654	2.30726	1.89432
chr13	28551902	28977291	2610307P16Rik	1.06796	0.392348	-1.44465	chr13	28551902	28977291	2610307P16Rik	4.24321	4.08141	-0.0560903
chr11	78075255	78104127	2610507B11Rik	24.7614	25.0197	0.0149673	chr11	78075255	78104127	2610507B11Rik	27.956	16.9497	-0.721894
chr11	59011294	59015933	2610507I01Rik	18.8164	2.40735	-2.96647	chr11	59011294	59015933	2610507I01Rik	5.75915	7.40125	0.361915
chr5	115271945	115273477	2610524H06Rik	5.08102	18.5897	1.87132	chr5	115271945	115273477	2610524H06Rik	8.50189	8.08418	-0.0726832
chr5	23356414	23360851	2700038G22Rik	24.6476	6.06562	-2.02272	chr5	23356414	23360851	2700038G22Rik	13.5041	13.0637	-0.0478315
chr12	72237834	72344290	2700049A03Rik	4.13034	3.76745	-0.132674	chr12	72237834	72344290	2700049A03Rik	2.24248	2.55192	0.186488
chr18	24629371	24636268	2700062C07Rik	11.7394	16.2827	0.471988	chr18	24629371	24636268	2700062C07Rik	21.1476	13.8923	-0.606216
chr19	7492114	7557781	2700081O15Rik	39.7638	8.61888	-2.20588	chr19	7492114	7557781	2700081O15Rik	28.8911	12.5712	-1.20051
chr12	56146647	56181097	2700097O09Rik	6.79826	8.54848	0.330502	chr12	56146647	56181097	2700097O09Rik	7.08175	4.95026	-0.516602
chr17	95149439	95234160	2700099C18Rik	45.6355	6.08935	-2.9058	chr17	95149439	95234160	2700099C18Rik	19.2752	20.299	0.0746686
chr11	63892985	63896761	2810001G20Rik	5.61575	10.9531	0.963787	chr11	63892985	63896761	2810001G20Rik	2.09593	11.0577	2.39939
chr2	94246863	94251837	2810002D19Rik	1.07432	8.47662	2.98007	chr2	94246863	94251837	2810002D19Rik	1.86029	4.94052	1.40913
chr8	127363254	127386929	2810004N23Rik	14.2627	63.194	2.14754	chr8	127363254	127386929	2810004N23Rik	20.2648	33.1072	0.708169
chr5	124778097	124791861	2810006K23Rik	2.47311	12.1097	2.29176	chr5	124778097	124791861	2810006K23Rik	1.7075	5.07216	1.57071
chr8	125566474	125568502	2810013P06Rik	13.0877	4.1832	-1.64553	chr8	125566474	125568502	2810013P06Rik	2.70481	6.52463	1.27037
chr11	58680741	58697840	2810021J22Rik	3.72812	1.14174	-1.70721	chr11	58680741	58697840	2810021J22Rik	3.04237	1.45058	-1.06856
chr1	159065313	159350367	2810025M15Rik	8.20741	42.1875	2.36182	chr1	159065313	159350367	2810025M15Rik	4.06602	7.06746	0.797574
chr12	112810527	112812613	2810029C07Rik	1.73439	0.363346	-2.25501	chr12	112810527	112812613	2810029C07Rik	2.37282	1.43382	-0.726739
chr11	69710853	69714489	2810408A11Rik	3.5315	1.47011	-1.26436	chr11	69710853	69714489	2810408A11Rik	1.43553	1.41157	-0.024288
chr1	64726442	64737233	2810408I11Rik	4.86502	32.5111	2.74041	chr1	64726442	64737233	2810408I11Rik	1.85536	17.9595	3.27497
chr11	120047963	120051170	2810410L24Rik	1.24137	1.27631	0.0400412	chr11	120047963	120051170	2810410L24Rik	1.18295	1.95777	0.726825
chr6	134819109	134850803	2810454H06Rik	17.7852	0.269155	-6.04609	chr6	134819109	134850803	2810454H06Rik	1.15997	1.03242	-0.168064
chr5	24606792	24608825	2900005J15Rik	4.85828	0.339675	-3.83822	chr5	24606792	24608825	2900005J15Rik	5.21633	1.03145	-2.33836
chr5	113515342	113650296	2900026A02Rik	8.47751	8.27732	-0.0344767	chr5	113515342	113650296	2900026A02Rik	9.78897	11.2191	0.196731
chr11	120086842	120092931	2900052L18Rik	6.77454	0.566886	-3.57899	chr11	120086842	120092931	2900052L18Rik	4.99217	1.78407	-1.48449
chr18	75979831	76308218	2900057B20Rik	0.921911	1.42392	0.627165	chr18	75979831	76308218	2900057B20Rik	0.545422	2.62407	2.26636
chr1	120285634	120506039	2900060B14Rik	11.4651	0.304339	-5.23542	chr1	120285634	120506039	2900060B14Rik	1.43415	1.12698	-0.347735
chr7	88668435	88676384	2900076A07Rik	2.96254	2.15296	-0.460514	chr7	88668435	88676384	2900076A07Rik	4.37276	5.16193	0.239368
chr2	163245506	163246097	2900093K20Rik	4.79307	3.82614	-0.325062	chr2	163245506	163246097	2900093K20Rik	5.78537	10.3121	0.833861
chr2	156213798	156218715	2900097C17Rik	27.7448	36.7258	0.404575	chr2	156213798	156218715	2900097C17Rik	9.63401	12.5554	0.382094
chr9	109732667	109733945	3000002C10Rik	16.3428	3.15185	-2.37438	chr9	109732667	109733945	3000002C10Rik	12.6963	7.28742	-0.80093
chr6	148869580	148895651	3010003L21Rik	21.0273	2.85355	-2.88143	chr6	148869580	148895651	3010003L21Rik	2.99004	6.06771	1.02099
chr1	122017763	122084766	3110009E18Rik	0.233221	17.8763	6.26021	chr1	122017763	122084766	3110009E18Rik	2.65869	2.12363	-0.324186
chr7	88927072	88934341	3110040N11Rik	9.08067	16.4818	0.860003	chr7	88927072	88934341	3110040N11Rik	4.74341	6.10649	0.364418
chr1	171899539	172019075	3110045C21Rik	1.09702	2.67863	1.2879	chr1	171899539	172019075	3110045C21Rik	0.0779002	2.96326	5.24941
chr12	72075609	72116810	3110056K07Rik	6.54545	4.72775	-0.46934	chr12	72075609	72116810	3110056K07Rik	7.28378	5.63705	-0.369748
chr5	139835692	139936488	3110082I17Rik	12.5899	36.1756	1.52275	chr5	139835692	139936488	3110082I17Rik	12.0118	20.2683	0.754778
chr17	5798656	5803242	3300005D01Rik	0.588777	1.84389	1.64696	chr17	5798656	5803242	3300005D01Rik	0.701181	1.51536	1.11181
chr14	13116716	13135745	3830406C13Rik	7.94817	7.48302	-0.0870009	chr14	13116716	13135745	3830406C13Rik	2.95095	5.18273	0.812532
chr13	107812649	107823598	3830408C21Rik	16.7481	0.107345	-7.28559	chr13	107812649	107823598	3830408C21Rik	1.28823	1.60437	0.316621
chr3	89571432	89577322	4632404H12Rik	4.14673	0.406167	-3.35183	chr3	89571432	89577322	4632404H12Rik	2.57265	1.14074	-1.17328
chr3	19794870	19798984	4632415L05Rik	17.6573	2.68677	-2.71632	chr3	19794870	19798984	4632415L05Rik	4.25438	2.59906	-0.710961
chr11	95720130	95722360	4833417C18Rik	13.9053	0.404804	-5.10226	chr11	95720130	95722360	4833417C18Rik	1.5637	2.46474	0.656468
chr17	87674225	87682154	4833418N02Rik	1.27527	0.733036	-0.798847	chr17	87674225	87682154	4833418N02Rik	2.90875	2.05409	-0.5019
chr13	120251565	120274927	4833420G17Rik	36.607	10.7591	-1.76656	chr13	120251565	120274927	4833420G17Rik	55.2077	25.7354	-1.10112
chr9	50889417	50910183	4833427G06Rik	12.6932	4.29429	-1.56356	chr9	50889417	50910183	4833427G06Rik	9.59958	10.9887	0.194979
chr19	46378074	46401646	4833438C02Rik	5.94163	3.98752	-0.575365	chr19	46378074	46401646	4833438C02Rik	7.4404	5.64359	-0.398767
chr13	54605165	54666743	4833439L19Rik	19.1208	33.5576	0.811499	chr13	54605165	54666743	4833439L19Rik	11.6571	9.217	-0.33884
chr8	87932657	87956740	4921524J17Rik	7.63834	18.3744	1.26636	chr8	87932657	87956740	4921524J17Rik	5.54533	12.1151	1.12746
chr11	3786090	3795129	4921536K21Rik	15.1967	0.340345	-5.48061	chr11	3786090	3795129	4921536K21Rik	1.4986	1.12019	-0.419877
chr2	130531935	130665881	4930402H24Rik	27.3431	9.04012	-1.59676	chr2	130531935	130665881	4930402H24Rik	32.7085	25.942	-0.334375
chr16	90936341	91044624	4930404I05Rik	4.00025	0.318625	-3.65016	chr16	90936341	91044624	4930404I05Rik	0.576132	1.65462	1.52203
chr7	130112571	130113973	4930413G21Rik	12.9408	7.96577	-0.700042	chr7	130112571	130113973	4930413G21Rik	8.88135	15.3602	0.790344
chr3	32233715	32266360	4930429B21Rik	0.700578	2.30341	1.71716	chr3	32233715	32266360	4930429B21Rik	1.18851	1.4394	0.276306
chr10	99950215	100051893	4930430F08Rik	4.48527	5.11934	0.190763	chr10	99950215	100051893	4930430F08Rik	1.24658	5.23728	2.07084
chr16	64765930	64770765	4930453N24Rik	16.512	41.2955	1.32247	chr16	64765930	64770765	4930453N24Rik	6.54686	13.8282	1.07874
chr18	70612793	70660719	4930503L19Rik	36.598	9.61706	-1.9281	chr18	70612793	70660719	4930503L19Rik	47.4445	13.7172	-1.79025
chr1	161974510	162008717	4930523C07Rik	3.00344	1.33382	-1.17105	chr1	161974510	162008717	4930523C07Rik	1.10858	2.48472	1.16437
chr9_random	46928	56293	4930526I15Rik	29.2574	1.63662	-4.16001	chr9_random	46928	56293	4930526I15Rik	5.81557	6.32931	0.122127
chr3	90875583	90879114	4930529C04Rik	1.89753	0.0306393	-5.95259	chr3	90875583	90879114	4930529C04Rik	0.200756	1.06238	2.40378
chr15	10644590	10719878	4930556M19Rik	34.715	0.44488	-6.286	chr15	10644590	10719878	4930556M19Rik	2.67765	4.46761	0.738537
chr14	55260997	55309579	4930579G18Rik	26.3719	0.115114	-7.83979	chr14	55260997	55309579	4930579G18Rik	4.98015	16.3744	1.71719
chr3	79433000	79436741	4930579G24Rik	7.88007	22.984	1.54435	chr3	79433000	79436741	4930579G24Rik	1.20593	12.1818	3.33651
chr9	34854160	34983572	4930581F22Rik	1.94706	0.380817	-2.35413	chr9	34854160	34983572	4930581F22Rik	2.85446	1.42705	-1.00018
chr9	15087780	15162232	4931406C07Rik	4.65024	6.36974	0.453928	chr9	15087780	15162232	4931406C07Rik	2.18542	2.30125	0.0745037
chr7	35021732	35070628	4931406P16Rik	6.96879	8.18102	0.231373	chr7	35021732	35070628	4931406P16Rik	19.4029	8.5684	-1.17918
chr14	55202499	55224745	4931414P19Rik	7.34236	3.8829	-0.91911	chr14	55202499	55224745	4931414P19Rik	7.56165	4.54539	-0.734297
chr8	107800346	107813428	4931428F04Rik	5.84092	2.0629	-1.50152	chr8	107800346	107813428	4931428F04Rik	6.11663	3.28667	-0.89611
chr3	36762027	36951955	4932438A13Rik	4.50402	2.03608	-1.14542	chr3	36762027	36951955	4932438A13Rik	5.2679	3.67068	-0.521178
chr5	137395015	137412979	4933404O12Rik	2.45615	2.85159	0.215372	chr5	137395015	137412979	4933404O12Rik	1.07347	0.442837	-1.27744
chrX	72970796	73010038	4933407K13Rik	4.33286	0.341703	-3.6645	chrX	72970796	73010038	4933407K13Rik	1.97447	1.2442	-0.666248
chr10	116387617	116400335	4933412E12Rik	4.53274	2.9415	-0.623831	chr10	116387617	116400335	4933412E12Rik	8.30762	4.82064	-0.78521
chr8	28249244	28285118	4933416M07Rik	8.08766	0.0318774	-7.98704	chr8	28249244	28285118	4933416M07Rik	0.106508	1.1942	3.48701
chr4	33114113	33118298	4933421O10Rik	1.17598	1.14552	-0.0378531	chr4	33114113	33118298	4933421O10Rik	1.55443	1.25879	-0.304345
chr11	71967430	72020984	4933427D14Rik	12.4948	3.46534	-1.85025	chr11	71967430	72020984	4933427D14Rik	13.9414	5.75454	-1.2766
chr11	97311473	97363714	4933428G20Rik	2.80737	0.185205	-3.92202	chr11	97311473	97363714	4933428G20Rik	8.19624	3.28077	-1.32093
chr3	107680147	107701603	4933431E20Rik	2.5587	0.929597	-1.46074	chr3	107680147	107701603	4933431E20Rik	1.74029	1.62796	-0.096267
chr3	89802681	89872269	4933434E20Rik	14.4242	20.3027	0.49318	chr3	89802681	89872269	4933434E20Rik	17.0057	13.4455	-0.338887
chr11	59299022	59324887	4933439C10Rik	15.9045	1.36769	-3.53962	chr11	59299022	59324887	4933439C10Rik	16.2597	4.0121	-2.01888
chr5	22937625	22940171	5031425E22Rik	10.0007	4.20634	-1.24947	chr5	22937625	22940171	5031425E22Rik	7.22998	3.37894	-1.09742
chr2	6460743	7317825	5031426D15Rik	12.5544	0.29978	-5.38814	chr2	6460743	7317825	5031426D15Rik	9.78178	8.88052	-0.139453
chr3	51319239	51371038	5031434O11Rik	5.63302	0.340398	-4.04861	chr3	51319239	51371038	5031434O11Rik	2.46988	1.18737	-1.05667
chr15	84774365	84818401	5031439G07Rik	9.8358	12.0098	0.288092	chr15	84774365	84818401	5031439G07Rik	5.89081	5.67088	-0.0548922
chr2	156665742	156688681	5430405H02Rik	3.79528	1.11665	-1.76503	chr2	156665742	156688681	5430405H02Rik	2.86493	5.89926	1.04204
chr5	100849860	100858554	5430416N02Rik	56.325	33.6963	-0.741185	chr5	100849860	100858554	5430416N02Rik	40.7562	30.2849	-0.428422
chr7	51739886	51740783	5430431A17Rik	156.742	16.7589	-3.22539	chr7	51739886	51740783	5430431A17Rik	42.161	37.6286	-0.16408
chr14	105826775	105836933	5430440P10Rik	0.979531	2.65614	1.43917	chr14	105826775	105836933	5430440P10Rik	0.818945	14.1672	4.11264
chrX	102236192	102265463	5530601H04Rik	2.05269	0.586084	-1.80834	chrX	102236192	102265463	5530601H04Rik	1.8912	0.709384	-1.41466
chr19	8958367	8965249	5730408K05Rik	564.649	27.7319	-4.34774	chr19	8958367	8965249	5730408K05Rik	287.52	172.428	-0.737667
chr4	126287097	126291615	5730409E04Rik	7.88009	4.61182	-0.772877	chr4	126287097	126291615	5730409E04Rik	4.21991	11.3849	1.43184
chr11	80173993	80191517	5730455P16Rik	5.65396	5.05271	-0.162203	chr11	80173993	80191517	5730455P16Rik	3.60803	4.96776	0.461387
chr5	48780741	49676898	5730480H06Rik	7.8138	0.860707	-3.18243	chr5	48780741	49676898	5730480H06Rik	7.13075	2.47134	-1.52876
chr5	64436211	64441465	5830416I19Rik	13.0475	0.0478125	-8.09217	chr5	64436211	64441465	5830416I19Rik	0.0557007	1.02966	4.20833
chr3	88580978	88636469	5830417I10Rik	8.18875	4.00135	-1.03316	chr3	88580978	88636469	5830417I10Rik	7.64373	4.37176	-0.806063
chr9	103325907	103382578	5830418P13Rik	1.55195	0.118012	-3.71708	chr9	103325907	103382578	5830418P13Rik	1.04241	0.53381	-0.965528
chr5	149801631	149806791	5930430L01Rik	7.52451	1.47711	-2.34882	chr5	149801631	149806791	5930430L01Rik	6.87246	2.28489	-1.5887
chr5	22056230	22063989	6030443J06Rik	5.66448	0.0279453	-7.6632	chr5	22056230	22063989	6030443J06Rik	0.344598	1.16054	1.75181
chr15	12737931	12754412	6030458C11Rik	42.8171	7.20765	-2.57059	chr15	12737931	12754412	6030458C11Rik	30.5269	23.9432	-0.350464
chr14	21521233	21523647	6230400D17Rik	2.0539	0.564563	-1.86316	chr14	21521233	21523647	6230400D17Rik	1.87072	3.12584	0.740648
chr5	138700885	138714040	6330418K02Rik	4.36797	3.44371	-0.342998	chr5	138700885	138714040	6330418K02Rik	1.56144	0.404739	-1.94781
chr3	96405055	96433742	6330549D23Rik	14.2429	0.346946	-5.35939	chr3	96405055	96433742	6330549D23Rik	5.4108	4.83742	-0.161605
chr8	122638051	122689207	6430548M08Rik	21.9278	37.182	0.76184	chr8	122638051	122689207	6430548M08Rik	20.2028	21.8565	0.113503
chr2	155826178	155833713	6430550D23Rik	3.49263	0.114056	-4.9365	chr2	155826178	155833713	6430550D23Rik	1.04602	1.21681	0.218194
chr9	107242970	107252014	6430571L13Rik	10.9992	0.230676	-5.57538	chr9	107242970	107252014	6430571L13Rik	0.40159	1.24528	1.63267
chr1	90123594	90174154	6430706D22Rik	262.181	54.6754	-2.2616	chr1	90123594	90174154	6430706D22Rik	77.4386	44.3101	-0.805419
chr8	19981359	20020392	6820431F20Rik	8.05383	1.51966	-2.40592	chr8	19981359	20020392	6820431F20Rik	4.43041	2.04832	-1.113
chr18	77870226	77954184	8030462N17Rik	8.56814	6.75315	-0.343423	chr18	77870226	77954184	8030462N17Rik	5.83036	8.49593	0.543187
chr5	149761825	149763234	8430423G03Rik	0.794918	1.23113	0.631107	chr5	149761825	149763234	8430423G03Rik	1.34974	1.00924	-0.419412
chr11	3315975	3379834	8430429K09Rik	1.94489	4.50705	1.21249	chr11	3315975	3379834	8430429K09Rik	1.07938	1.99817	0.888474
chr17	41012430	41017507	9130008F23Rik	3.73531	1.43391	-1.38128	chr17	41012430	41017507	9130008F23Rik	4.79949	1.71669	-1.48325
chr7	134525773	134530680	9130019O22Rik	3.84533	1.81295	-1.08477	chr7	134525773	134530680	9130019O22Rik	1.97793	0.965067	-1.03529
chr7	135377964	135388614	9130023H24Rik	7.23278	2.39113	-1.59686	chr7	135377964	135388614	9130023H24Rik	1.50819	1.90319	0.335605
chr1	56850824	57037092	9130024F11Rik	8.45805	0.24559	-5.106	chr1	56850824	57037092	9130024F11Rik	0.883822	2.36211	1.41825
chr7	26013277	26022870	9130221H12Rik	15.972	6.88875	-1.21323	chr7	26013277	26022870	9130221H12Rik	6.84972	9.73758	0.507519
chr15	57853826	57865849	9130401M01Rik	11.4465	46.3264	2.01693	chr15	57853826	57865849	9130401M01Rik	15.5208	22.9354	0.563378
chr5	52581919	52589223	9230114K14Rik	9.23496	7.55066	-0.290504	chr5	52581919	52589223	9230114K14Rik	20.0735	20.7451	0.0474755
chr15	98369120	98401295	9330020H09Rik	8.51443	0.903179	-3.23682	chr15	98369120	98401295	9330020H09Rik	1.71334	7.02957	2.03662
chr6	128119717	128133821	9330102E08Rik	1.48451	0.682154	-1.12182	chr6	128119717	128133821	9330102E08Rik	3.37974	2.55825	-0.401753
chr7	17456702	17460235	9330104G04Rik	1.11102	1.20181	0.113326	chr7	17456702	17460235	9330104G04Rik	0.953971	1.7453	0.871462
chr8	124967555	124975222	9330133O14Rik	7.98932	1.64018	-2.28421	chr8	124967555	124975222	9330133O14Rik	0.581961	3.49192	2.58503
chr12	70290073	70300855	9330151L19Rik	3.57426	0.839704	-2.08969	chr12	70290073	70300855	9330151L19Rik	5.18467	2.90151	-0.837446
chr4	155484106	155501372	9430015G10Rik	87.8422	10.7077	-3.03627	chr4	155484106	155501372	9430015G10Rik	54.0875	23.5009	-1.20258
chr7	144567251	144602439	9430038I01Rik	10.9857	6.11972	-0.844092	chr7	144567251	144602439	9430038I01Rik	3.87805	8.52562	1.13647
chr13	67654137	67671829	9430065F17Rik	3.03126	2.10969	-0.522887	chr13	67654137	67671829	9430065F17Rik	1.25505	1.93629	0.625552
chr8	113618644	113669398	9430091E24Rik	3.45173	0.384282	-3.16708	chr8	113618644	113669398	9430091E24Rik	1.34466	0.263796	-2.34975
chrX	45610110	45638603	9530027J09Rik	3.20705	0.0817094	-5.2946	chrX	45610110	45638603	9530027J09Rik	2.24615	0.323536	-2.79545
chr7	28914484	28949830	9530053A07Rik	0.807383	2.79871	1.79344	chr7	28914484	28949830	9530053A07Rik	1.05936	2.21873	1.06654
chr11	52209929	52222225	9530068E07Rik	31.356	94.1361	1.58601	chr11	52209929	52222225	9530068E07Rik	12.978	39.0176	1.58806
chr9	22215954	22249129	9530077C05Rik	1.7609	1.59478	-0.142955	chr9	22215954	22249129	9530077C05Rik	10.2611	3.41828	-1.58584
chr9	68501592	69236053	9530091C08Rik	2.28214	0.00491289	-8.8596	chr9	68501592	69236053	9530091C08Rik	1.47581	0.481413	-1.61616
chr14	70554211	70559309	9930012K11Rik	7.17875	1.45634	-2.30139	chr14	70554211	70559309	9930012K11Rik	3.42935	0.822542	-2.05977
chr19	29788891	29880499	9930021J03Rik	7.14559	3.70567	-0.947319	chr19	29788891	29880499	9930021J03Rik	10.1507	19.83	0.96611
chr4	124614291	124621905	9930104L06Rik	20.8842	3.94974	-2.40258	chr4	124614291	124621905	9930104L06Rik	10.2484	7.77762	-0.398005
chr1	194999662	195027740	A130010J15Rik	10.4899	4.64526	-1.17517	chr1	194999662	195027740	A130010J15Rik	3.5658	4.65939	0.385912
chrX	20528790	20564475	A230072C01Rik	3.12564	1.11676	-1.48483	chrX	20528790	20564475	A230072C01Rik	2.4611	0.664225	-1.88956
chr1	196843592	196864102	A330023F24Rik	1.72545	0.0153505	-6.81254	chr1	196843592	196864102	A330023F24Rik	2.25026	0.829218	-1.44027
chr2	91077302	91078514	A330069E16Rik	0.275051	3.16023	3.52226	chr2	91077302	91078514	A330069E16Rik	0.81345	2.49357	1.61609
chr4	153331345	153336033	A430005L14Rik	26.2534	44.472	0.760395	chr4	153331345	153336033	A430005L14Rik	11.9049	21.3731	0.844247
chr5	139064086	139090054	A430033K04Rik	3.40135	2.16089	-0.654487	chr5	139064086	139090054	A430033K04Rik	3.83671	1.90839	-1.00751
chr10	127936302	127941298	A430046D13Rik	1.87748	1.24757	-0.589676	chr10	127936302	127941298	A430046D13Rik	2.04352	2.74265	0.424513
chr15	83057151	83082159	A4galt	9.04353	4.62758	-0.966629	chr15	83057151	83082159	A4galt	5.50949	10.3121	0.904347
chr13	15899075	16123442	A530046M15Rik	1.59529	0.0493046	-5.01595	chr13	15899075	16123442	A530046M15Rik	0.52478	2.51541	2.26101
chr5	20398841	20462216	A630072M18Rik	5.49628	1.22933	-2.16059	chr5	20398841	20462216	A630072M18Rik	3.63724	4.74219	0.382711
chr16	98283676	98303604	A630089N07Rik	2.20425	0.449756	-2.29307	chr16	98283676	98303604	A630089N07Rik	1.2159	0.656376	-0.889428
chr2	130698276	130732132	A730017L22Rik	9.26611	2.09997	-2.14159	chr2	130698276	130732132	A730017L22Rik	14.3129	7.58607	-0.915894
chr9	62090402	62091907	A730043L09Rik	2.1856	0.106712	-4.35623	chr9	62090402	62091907	A730043L09Rik	0.215562	1.70299	2.98189
chr10	126507536	126508157	A730063M14Rik	44.2218	28.9561	-0.610893	chr10	126507536	126508157	A730063M14Rik	19.0979	435.749	4.51201
chr3	64753133	65182147	A730090N16Rik	2.43257	0.290286	-3.06693	chr3	64753133	65182147	A730090N16Rik	1.07198	1.42726	0.412966
chr5	107926763	107941575	A830010M20Rik	3.39569	0.82446	-2.04218	chr5	107926763	107941575	A830010M20Rik	1.63032	1.30261	-0.323755
chr19	4423471	4477143	A930001C03Rik	9.34597	3.17967	-1.55547	chr19	4423471	4477143	A930001C03Rik	7.42895	1.62863	-2.1895
chr16	19876660	19884367	A930003A15Rik	6.17909	5.78622	-0.0947714	chr16	19876660	19884367	A930003A15Rik	0.157697	4.4369	4.81433
chr3	115584496	115591048	A930005H10Rik	1.40362	2.50264	0.834295	chr3	115584496	115591048	A930005H10Rik	4.7314	6.23281	0.397617
chr16	13754656	13758630	A930007A09Rik	11.8763	1.14498	-3.37468	chr16	13754656	13758630	A930007A09Rik	1.24368	1.92644	0.631322
chr8	23738590	23763909	A930013F10Rik	27.5717	0.718648	-5.26176	chr8	23738590	23763909	A930013F10Rik	24.6561	18.5566	-0.410013
chr5	123439362	123448350	A930024E05Rik	2.57897	0.877305	-1.55565	chr5	123439362	123448350	A930024E05Rik	1.87963	0.871059	-1.10961
chr10	68671299	68754532	A930033H14Rik	9.82904	2.64832	-1.89197	chr10	68671299	68754532	A930033H14Rik	5.43607	1.21082	-2.16659
chr11	119251412	119352549	A930037H05Rik	1.13183	0.0859247	-3.71945	chr11	119251412	119352549	A930037H05Rik	1.91417	0.927441	-1.04539
chrX	12513998	12515667	AA414768	1.46116	5.77671	1.98313	chrX	12513998	12515667	AA414768	1.47114	7.31829	2.31457
chr2	122463622	122466812	AA467197	5.53033	7.16033	0.37266	chr2	122463622	122466812	AA467197	6.8134	23.1966	1.76747
chr17	27700713	27702672	AI413582	21.5074	54.0308	1.32895	chr17	27700713	27702672	AI413582	24.7263	52.8304	1.09532
chr8	38048626	38087292	AI429214	2.00727	0.502712	-1.99743	chr8	38048626	38087292	AI429214	1.52501	1.07114	-0.509675
chr11	83105200	83108431	AI450353	8.45836	0.212191	-5.31694	chr11	83105200	83108431	AI450353	3.57527	1.46165	-1.29045
chr7	134234949	134237563	AI467606	10.6644	19.7699	0.890496	chr7	134234949	134237563	AI467606	9.36256	13.5449	0.532771
chr1	43155554	43172791	AI597479	9.39562	10.503	0.160747	chr1	43155554	43172791	AI597479	4.45811	10.5732	1.24591
chr11	83037077	83040086	AI662270	5.31341	0.666143	-2.99573	chr11	83037077	83040086	AI662270	2.22879	1.22329	-0.86549
chr19	5425143	5427316	AI837181	41.6617	86.3153	1.0509	chr19	5425143	5427316	AI837181	45.2633	53.6049	0.244023
chr5	31871964	31873770	AI839979	0.334669	1.21536	1.86058	chr5	31871964	31873770	AI839979	0.595978	3.27234	2.45699
chr7	48628299	48648749	AI987944	13.2158	5.24532	-1.33316	chr7	48628299	48648749	AI987944	9.43221	6.34278	-0.57248
chr4	118897742	118905329	AU022252	2.99356	6.32275	1.07869	chr4	118897742	118905329	AU022252	0.946713	1.51703	0.680248
chr4	126420993	126645167	AU040320	10.5951	7.13141	-0.571141	chr4	126420993	126645167	AU040320	10.527	4.47877	-1.23292
chr2	120676391	120796451	AV039307	2.62849	0.217141	-3.59753	chr2	120676391	120796451	AV039307	1.75273	7.37563	2.07316
chr7	48734243	48755260	AW146154	2.24619	1.29576	-0.793678	chr7	48734243	48755260	AW146154	2.39718	1.16085	-1.04616
chr13	14722511	14730469	AW209491	14.6215	10.0239	-0.544638	chr13	14722511	14730469	AW209491	4.73748	4.32907	-0.130062
chr15	3932034	3945746	AW549877	18.5274	3.96065	-2.22585	chr15	3932034	3945746	AW549877	14.5919	9.88628	-0.561668
chr9	39394980	39411855	AW551984	1.19262	1.70615	0.516619	chr9	39394980	39411855	AW551984	1.57531	0.676002	-1.22053
chr18	25327520	25625822	AW554918	2.61932	2.12094	-0.304487	chr18	25327520	25625822	AW554918	4.66904	2.46182	-0.923402
chr8	46146055	46150772	AY512931	2.23681	0.0176813	-6.98308	chr8	46146055	46150772	AY512931	2.76468	0.288242	-3.26176
chr15	102168677	102181190	Aaas	62.1243	88.4895	0.510347	chr15	102168677	102181190	Aaas	108.569	66.6647	-0.703622
chr5	125956242	125997775	Aacs	13.648	11.1405	-0.292876	chr5	125956242	125997775	Aacs	16.0817	8.80345	-0.869275
chr9	63450452	63492397	Aagab	5.78802	5.51282	-0.0702794	chr9	63450452	63492397	Aagab	4.96216	7.05931	0.508558
chr6	86799510	86953221	Aak1	4.00015	2.39812	-0.738154	chr6	86799510	86953221	Aak1	3.82621	2.20326	-0.796279
chr7	104698840	104728007	Aamdc	10.3577	45.4659	2.13408	chr7	104698840	104728007	Aamdc	6.04247	21.5014	1.83122
chr1	74326413	74331312	Aamp	71.5498	99.3638	0.473772	chr1	74326413	74331312	Aamp	53.8617	48.2569	-0.158523
chr2	156373311	156394708	Aar2	5.07904	10.793	1.08746	chr2	156373311	156394708	Aar2	5.46733	2.55306	-1.09861
chr8	113557741	113579469	Aars	62.3838	88.825	0.509795	chr8	113557741	113579469	Aars	51.7807	46.8203	-0.145283
chr17	45643780	45657792	Aars2	14.6254	10.3131	-0.503993	chr17	45643780	45657792	Aars2	27.2435	13.6103	-1.00121
chr11	101268153	101278747	Aarsd1	26.0673	31.3346	0.265516	chr11	101268153	101278747	Aarsd1	17.7719	12.6847	-0.486515
chr5	77304959	77334539	Aasdh	7.98204	1.97036	-2.0183	chr5	77304959	77334539	Aasdh	10.5288	5.2264	-1.01045
chr9	4294792	4309494	Aasdhppt	5.30314	13.3212	1.32881	chr9	4294792	4309494	Aasdhppt	10.0191	11.6723	0.220335
chr11	84236357	84327003	Aatf	16.0701	23.9653	0.576564	chr11	84236357	84327003	Aatf	13.024	7.2395	-0.84721
chr2	25284118	25304060	Abca2	3.35074	2.01558	-0.733283	chr2	25284118	25304060	Abca2	4.29141	2.42197	-0.825272
chr17	24488967	24551458	Abca3	1.89293	1.24855	-0.600368	chr17	24488967	24551458	Abca3	2.53435	0.454129	-2.48044
chr3	121747377	121882979	Abca4	1.28968	0.250872	-2.36199	chr3	121747377	121882979	Abca4	1.4903	0.499641	-1.57664
chr11	110130682	110199030	Abca5	6.26814	3.81777	-0.715306	chr11	110130682	110199030	Abca5	3.46651	3.81827	0.139438
chr10	79459238	79478317	Abca7	12.1971	1.93352	-2.65724	chr10	79459238	79478317	Abca7	8.434	3.50308	-1.26759
chr11	109886947	109957251	Abca8a	1.39849	0.835173	-0.743719	chr11	109886947	109957251	Abca8a	2.37931	1.30034	-0.871657
chr11	109793519	109857159	Abca8b	3.79562	0.968061	-1.97117	chr11	109793519	109857159	Abca8b	7.22545	3.30103	-1.13017
chr8	126476358	126507022	Abcb10	5.65746	6.89344	0.285071	chr8	126476358	126507022	Abcb10	5.18358	5.95877	0.201065
chr5	8773576	8866314	Abcb1b	19.707	16.2656	-0.276878	chr5	8773576	8866314	Abcb1b	52.1096	31.4673	-0.727697
chr1	75168214	75176966	Abcb6	14.5484	10.3056	-0.49744	chr1	75168214	75176966	Abcb6	11.5495	8.42169	-0.455646
chrX	101475903	101609185	Abcb7	4.2272	6.64775	0.653165	chrX	101475903	101609185	Abcb7	2.83249	4.13299	0.545115
chr5	23899973	23915765	Abcb8	7.22965	8.19728	0.181221	chr5	23899973	23915765	Abcb8	16.0039	8.89405	-0.847512
chr5	124511865	124545807	Abcb9	2.07456	0.813289	-1.35097	chr5	124511865	124545807	Abcb9	1.78714	1.32666	-0.429855
chr16	14361650	14474971	Abcc1	47.3447	38.8956	-0.283596	chr16	14361650	14474971	Abcc1	69.3586	36.099	-0.942116
chr17	46434431	46464972	Abcc10	5.06364	1.18557	-2.0946	chr17	46434431	46464972	Abcc10	17.6777	3.17765	-2.4759
chr14	118881913	119105441	Abcc4	4.16632	2.64575	-0.655097	chr14	118881913	119105441	Abcc4	2.22023	2.10947	-0.0738303
chr16	20331376	20426467	Abcc5	52.9103	6.80481	-2.95892	chr16	20331376	20426467	Abcc5	55.0881	25.4254	-1.11547
chrX	70931516	70983873	Abcd1	6.31186	3.63148	-0.797506	chrX	70931516	70983873	Abcd1	6.1569	2.5339	-1.28084
chr3	121461821	121518220	Abcd3	11.2598	10.4786	-0.103734	chr3	121461821	121518220	Abcd3	14.3571	8.74152	-0.715809
chr12	85943480	85958416	Abcd4	31.4121	15.3815	-1.03013	chr12	85943480	85958416	Abcd4	52.8503	24.3487	-1.11806
chr8	82207340	82235639	Abce1	36.4367	75.1581	1.04454	chr8	82207340	82235639	Abce1	28.5536	44.0737	0.626244
chr17	36093763	36106695	Abcf1	58.0422	97.6335	0.750274	chr17	36093763	36106695	Abcf1	64.9483	63.9597	-0.0221292
chr5	24071158	24083285	Abcf2	29.7568	61.5132	1.04768	chr5	24071158	24083285	Abcf2	27.2348	21.289	-0.355344
chr16	20548675	20561676	Abcf3	19.3552	18.4659	-0.0678582	chr16	20548675	20561676	Abcf3	27.2917	15.615	-0.805526
chr17	31194638	31254926	Abcg1	3.81623	0.233718	-4.0293	chr17	31194638	31254926	Abcg1	0.956829	1.54801	0.694085
chr6	58534969	58642445	Abcg2	5.72418	7.60694	0.410247	chr6	58534969	58642445	Abcg2	2.70205	4.41675	0.708931
chr5	31252438	31262700	Abhd1	22.8916	4.00273	-2.51576	chr5	31252438	31262700	Abhd1	19.5492	10.0738	-0.956497
chr16	45729837	45743068	Abhd10	8.34329	13.0555	0.645971	chr16	45729837	45743068	Abhd10	7.59401	13.7628	0.857841
chr5	135485021	135489027	Abhd11	47.3277	43.1915	-0.131936	chr5	135485021	135489027	Abhd11	124.481	68.7849	-0.855759
chr2	150658250	150730467	Abhd12	7.38073	21.7747	1.56082	chr2	150658250	150730467	Abhd12	10.5115	12.6977	0.272605
chr8	9977716	9992154	Abhd13	7.32649	7.3304	0.000768954	chr8	9977716	9992154	Abhd13	5.60797	6.97482	0.314678
chr9	106342383	106350009	Abhd14a	20.0436	32.5081	0.697657	chr9	106342383	106350009	Abhd14a	35.6537	36.1241	0.0189071
chr9	106350970	106355249	Abhd14b	5.29425	3.19645	-0.727954	chr9	106350970	106355249	Abhd14b	8.17976	2.31998	-1.81795
chr17	35226235	35239932	Abhd16a	27.3678	22.3375	-0.293016	chr17	35226235	35239932	Abhd16a	29.4449	15.1678	-0.957003
chr10	80046393	80053086	Abhd17a	48.0911	68.0612	0.501063	chr10	80046393	80053086	Abhd17a	26.9528	39.5822	0.554417
chr19	21727798	21760127	Abhd17b	32.864	37.398	0.186452	chr19	21727798	21760127	Abhd17b	28.0502	52.0733	0.892531
chr7	91257865	91300403	Abhd17c	11.6064	33.6368	1.53513	chr7	91257865	91300403	Abhd17c	6.32125	11.494	0.862594
chr7	86418151	86506487	Abhd2	3.6068	2.90737	-0.311004	chr7	86418151	86506487	Abhd2	3.30536	2.63708	-0.325866
chr14	54873803	54888844	Abhd4	20.01	47.2875	1.24074	chr14	54873803	54888844	Abhd4	27.4706	39.4038	0.520446
chr9	122260733	122290641	Abhd5	3.4949	11.4537	1.71249	chr9	122260733	122290641	Abhd5	3.3509	5.26922	0.653041
chr14	8835401	8889284	Abhd6	6.15554	3.57091	-0.785596	chr14	8835401	8889284	Abhd6	0.986579	3.86849	1.97126
chr8	73980598	73987556	Abhd8	10.9859	32.2465	1.55349	chr8	73980598	73987556	Abhd8	6.07001	9.6157	0.663694
chr2	22751041	22895761	Abi1	38.0033	27.4063	-0.471615	chr2	22751041	22895761	Abi1	38.584	33.5615	-0.201195
chr1	60466462	60538007	Abi2	8.96406	9.76842	0.123974	chr1	60466462	60538007	Abi2	12.873	10.2829	-0.324103
chr4	56762551	56822477	Abitram	5.69029	6.26404	0.138591	chr4	56762551	56822477	Abitram	4.05028	5.3596	0.404103
chr2	31544056	31659882	Abl1	41.6177	23.7442	-0.809625	chr2	31544056	31659882	Abl1	29.0011	19.5276	-0.570591
chr1	158488917	158579750	Abl2	10.4277	5.97284	-0.80393	chr1	158488917	158579750	Abl2	9.03058	6.48981	-0.476644
chr19	57107222	57389409	Ablim1	19.4262	7.25758	-1.42044	chr19	57107222	57389409	Ablim1	23.3687	17.038	-0.455827
chr11	76230233	76391241	Abr	27.5695	16.1613	-0.770532	chr11	76230233	76391241	Abr	29.5478	12.5536	-1.23495
chr10	17731065	17743058	Abracl	33.6543	151.135	2.16697	chr10	17731065	17743058	Abracl	16.2859	39.849	1.29092
chr5	101233820	101249954	Abraxas1	11.1681	7.32368	-0.608745	chr5	101233820	101249954	Abraxas1	9.22371	7.16012	-0.365363
chr7	140050907	140076797	Abraxas2	12.3045	15.265	0.311039	chr7	140050907	140076797	Abraxas2	11.72	9.03455	-0.375454
chr13	23510229	23515735	Abt1	5.80594	8.90264	0.616705	chr13	23510229	23515735	Abt1	3.03389	4.66441	0.620525
chr6	88785907	88791929	Abtb1	22.6946	4.38486	-2.37175	chr6	88785907	88791929	Abtb1	32.3374	17.3954	-0.894503
chr2	103406466	103558580	Abtb2	2.297	1.61851	-0.505088	chr2	103406466	103558580	Abtb2	4.56521	1.52318	-1.58359
chr9	119250411	119259413	Acaa1a	22.1703	30.1501	0.443533	chr9	119250411	119259413	Acaa1a	28.2109	16.4043	-0.782176
chr9	119011626	119066211	Acaa1b	3.64651	0.463245	-2.97667	chr9	119011626	119066211	Acaa1b	1.68018	1.71815	0.0322361
chr18	74938865	74965861	Acaa2	15.7361	37.5851	1.25608	chr18	74938865	74965861	Acaa2	4.4733	11.5191	1.36461
chr11	84008939	84215153	Acaca	6.69205	7.30994	0.127413	chr11	84008939	84215153	Acaca	5.09405	5.11506	0.00593903
chr5	122071037	122110519	Acad10	2.01552	2.11448	0.0691531	chr5	122071037	122110519	Acad10	2.71535	1.88152	-0.529239
chr9	103966053	104029986	Acad11	6.5023	5.9612	-0.125349	chr9	103966053	104029986	Acad11	7.0445	5.43692	-0.373708
chr5	122048289	122068947	Acad12	0.60192	1.14009	0.921499	chr5	122048289	122068947	Acad12	0.517904	2.69416	2.37908
chr9	26781725	26807134	Acad8	23.8037	19.5038	-0.287432	chr9	26781725	26807134	Acad8	43.4452	24.5531	-0.82329
chr3	35964900	35991779	Acad9	9.14006	16.0429	0.811656	chr3	35964900	35991779	Acad9	11.8801	11.9935	0.0137022
chr1	66877412	66909883	Acadl	15.9062	85.7042	2.42978	chr1	66877412	66909883	Acadl	13.8805	18.3306	0.401197
chr3	153585316	153607607	Acadm	23.5107	36.2395	0.624241	chr3	153585316	153607607	Acadm	34.6742	32.6873	-0.0851338
chr5	115560307	115569355	Acads	15.7227	24.2062	0.622528	chr5	115560307	115569355	Acads	13.2545	7.54592	-0.812718
chr7	138554114	138589725	Acadsb	5.02728	5.83071	0.213894	chr7	138554114	138589725	Acadsb	3.45326	3.76901	0.126227
chr11	69823684	69828930	Acadvl	25.0864	39.5014	0.654998	chr11	69823684	69828930	Acadvl	37.0249	30.0645	-0.300436
chr16	31092498	31201324	Acap2	14.4181	9.79147	-0.558286	chr16	31092498	31201324	Acap2	11.3939	12.383	0.120107
chr4	155265983	155281360	Acap3	17.4276	10.0379	-0.795917	chr4	155265983	155281360	Acap3	24.8598	10.5061	-1.24259
chr9	53388626	53418455	Acat1	8.88583	28.6589	1.68941	chr9	53388626	53418455	Acat1	4.93717	10.9294	1.14646
chr17	13135907	13153591	Acat2	15.7033	20.4259	0.37933	chr17	13135907	13153591	Acat2	6.06143	10.92	0.849238
chr17	13109194	13133262	Acat3	1.66968	0.0869857	-4.26265	chr17	13109194	13133262	Acat3	1.93351	1.08141	-0.838305
chr1	182656173	182684335	Acbd3	20.713	18.2567	-0.182109	chr1	182656173	182684335	Acbd3	12.0192	25.4068	1.07988
chr11	102963001	102973513	Acbd4	11.1174	4.88247	-1.18713	chr11	102963001	102973513	Acbd4	17.1678	12.3865	-0.47093
chr2	22923720	22970032	Acbd5	9.64388	8.89868	-0.116021	chr2	22923720	22970032	Acbd5	6.89558	8.94645	0.375644
chr1	157405249	157534363	Acbd6	32.5948	68.4757	1.07095	chr1	157405249	157534363	Acbd6	13.2532	31.5917	1.2532
chr2	93673623	93690100	Accs	9.54556	1.10111	-3.11588	chr2	93673623	93690100	Accs	3.27569	2.93096	-0.160425
chr8	108210173	108227394	Acd	22.4099	26.7579	0.255828	chr8	108210173	108227394	Acd	21.4107	13.1191	-0.70666
chr7	105362319	105469718	Acer3	4.96731	4.66433	-0.0907948	chr7	105362319	105469718	Acer3	2.67991	2.97756	0.151945
chr14	55260997	55309579	Acin1	400.63	157.611	-1.3459	chr14	55260997	55309579	Acin1	393.189	315.167	-0.319108
chr1	92100554	92112297	Ackr3	41.3351	56.6059	0.453584	chr1	92100554	92112297	Ackr3	30.9415	28.5028	-0.118442
chr11	100337665	100389314	Acly	16.1258	22.6125	0.487754	chr11	100337665	100389314	Acly	19.1	13.9846	-0.449739
chr4	40090297	40146042	Aco1	14.0081	16.7116	0.254587	chr4	40090297	40146042	Aco1	11.9076	8.29304	-0.521904
chr15	81702892	81756643	Aco2	76.8827	193.656	1.33277	chr15	81702892	81756643	Aco2	64.917	64.7145	-0.00450683
chr12	85350451	85358619	Acot1	3.86482	15.5824	2.01145	chr12	85350451	85358619	Acot1	2.89929	8.20163	1.50021
chr4	106406519	106477612	Acot11	1.44066	0.650252	-1.14766	chr4	106406519	106477612	Acot11	1.62418	0.844201	-0.944055
chr13	24909823	24923358	Acot13	14.7061	43.8468	1.57605	chr13	24909823	24923358	Acot13	6.09886	24.4665	2.0042
chr12	85328810	85334825	Acot2	14.6035	5.62987	-1.37514	chr12	85328810	85334825	Acot2	2.60331	12.0366	2.20901
chr4	151552208	151645964	Acot7	62.3945	129.026	1.04817	chr4	151552208	151645964	Acot7	49.2205	75.2515	0.612461
chr2	164611520	164630381	Acot8	17.8619	7.53828	-1.24458	chr2	164611520	164630381	Acot8	10.6324	12.5766	0.242279
chrX	151696985	151732197	Acot9	25.3894	53.4611	1.07426	chrX	151696985	151732197	Acot9	28.0759	17.0508	-0.719495
chr11	116033196	116076632	Acox1	20.644	11.2113	-0.880762	chr11	116033196	116076632	Acox1	14.9006	9.73133	-0.614662
chr5	35923875	35956450	Acox3	6.65449	3.20716	-1.05303	chr5	35923875	35956450	Acox3	8.05388	4.8074	-0.744428
chr12	31569188	31596477	Acp1	11.9491	44.7678	1.90555	chr12	31569188	31596477	Acp1	7.84149	10.9372	0.480042
chr2	91043068	91077223	Acp2	13.6453	7.50613	-0.862263	chr2	91043068	91077223	Acp2	12.4742	15.1104	0.276585
chr3	96962699	96980499	Acp6	10.459	13.0319	0.317297	chr3	96962699	96980499	Acp6	17.9849	12.693	-0.502753
chr6	124999944	125013283	Acrbp	20.1337	2.56529	-2.97241	chr6	124999944	125013283	Acrbp	25.1041	23.9272	-0.0692686
chr9	54452803	54509692	Acsbg1	2.88137	1.87894	-0.616834	chr9	54452803	54509692	Acsbg1	9.82826	1.21623	-3.01452
chr11	94418415	94463100	Acsf2	4.16155	4.87824	0.22924	chr11	94418415	94463100	Acsf2	2.44239	1.38191	-0.821631
chr8	125299385	125341787	Acsf3	5.20414	9.58116	0.880541	chr8	125299385	125341787	Acsf3	3.73321	6.28467	0.751421
chr8	47556390	47621405	Acsl1	2.61277	4.05752	0.635016	chr8	47556390	47621405	Acsl1	2.29178	1.46309	-0.647453
chr1	78654399	78704318	Acsl3	15.5791	18.0736	0.214271	chr1	78654399	78704318	Acsl3	14.2094	22.0024	0.630817
chrX	138752535	138825078	Acsl4	24.3723	22.6113	-0.1082	chrX	138752535	138825078	Acsl4	9.68232	9.24884	-0.0660797
chr19	55327858	55371118	Acsl5	20.5579	28.8362	0.488187	chr19	55327858	55371118	Acsl5	13.5172	13.6798	0.0172572
chr11	54117325	54175041	Acsl6	1.07343	1.35818	0.339448	chr11	54117325	54175041	Acsl6	0.477659	1.15112	1.26898
chr2	155343778	155388479	Acss2	1.17813	1.22633	0.0578454	chr2	155343778	155388479	Acss2	2.00273	0.319752	-2.64694
chr8	126415657	126418675	Acta1	30.1823	107.438	1.83173	chr8	126415657	126418675	Acta1	12.1695	29.1128	1.25839
chr19	34314825	34329863	Acta2	74.7976	240.44	1.68462	chr19	34314825	34329863	Acta2	20.0429	43.5421	1.11932
chr5	143664793	143668433	Actb	790.136	4225.33	2.41889	chr5	143664793	143668433	Actb	401.662	4398.4	3.45292
chr2	113873019	113878611	Actc1	9.98146	21.7738	1.12527	chr2	113873019	113878611	Actc1	1.47084	0.831704	-0.822503
chr11	120207000	120209809	Actg1	363.015	1234.65	1.76601	chr11	120207000	120209809	Actg1	240.14	312.227	0.378723
chr3	32607467	32625893	Actl6a	32.7018	75.4895	1.2069	chr3	32607467	32625893	Actl6a	36.3619	33.6163	-0.113264
chr4	56752876	56754297	Actl7b	2.24163	0.0323532	-6.11449	chr4	56752876	56754297	Actl7b	2.03135	1.22076	-0.734653
chr12	81268528	81361368	Actn1	65.7922	163.828	1.3162	chr12	81268528	81361368	Actn1	85.0922	178.822	1.07143
chr19	4861215	4877909	Actn3	21.2702	25.6196	0.268411	chr19	4861215	4877909	Actn3	3.3069	4.18336	0.339182
chr7	29666674	29747351	Actn4	92.6788	261.058	1.49406	chr7	29666674	29747351	Actn4	115.307	554.582	2.26591
chr12	72038843	72065704	Actr10	11.0649	22.2693	1.00907	chr12	72038843	72065704	Actr10	8.16005	9.07222	0.152879
chr19	46451302	46470231	Actr1a	36.0776	62.4085	0.79064	chr19	46451302	46470231	Actr1a	22.8173	22.2638	-0.0354275
chr1	36756046	36766770	Actr1b	23.5839	33.4911	0.505976	chr1	36756046	36766770	Actr1b	30.3153	16.2756	-0.897338
chr11	19962306	20012954	Actr2	24.785	65.898	1.41077	chr11	19962306	20012954	Actr2	12.4087	46.7599	1.91392
chr1	127289481	127332304	Actr3	51.5749	130.925	1.344	chr1	127289481	127332304	Actr3	40.4198	44.5028	0.138835
chr5	25265790	25356509	Actr3b	1.75704	1.72478	-0.0267421	chr5	25265790	25356509	Actr3b	1.1421	0.564428	-1.01682
chr2	158450648	158464947	Actr5	13.8539	6.2152	-1.15642	chr2	158450648	158464947	Actr5	6.58901	5.85044	-0.171517
chr10	89174712	89195040	Actr6	9.64169	8.19115	-0.235221	chr10	89174712	89195040	Actr6	5.51208	5.15885	-0.0955483
chr14	30791522	30806407	Actr8	5.54009	14.5098	1.38905	chr14	30791522	30806407	Actr8	9.56197	10.0125	0.0664239
chr2	58298848	58419239	Acvr1	25.2506	29.5057	0.224679	chr2	58298848	58419239	Acvr1	11.9963	16.364	0.447929
chr15	101004502	101044115	Acvr1b	7.09055	3.92183	-0.854373	chr15	101004502	101044115	Acvr1b	7.0693	5.26881	-0.424091
chr2	48669628	49172589	Acvr2a	8.93897	4.81632	-0.892177	chr2	48669628	49172589	Acvr2a	4.75694	1.77657	-1.42094
chr9	119311295	119351266	Acvr2b	5.40487	1.08255	-2.31982	chr9	119311295	119351266	Acvr2b	1.90409	1.42689	-0.416228
chr15	100958952	100975767	Acvrl1	1.69969	2.83226	0.736678	chr15	100958952	100975767	Acvrl1	12.4771	6.71905	-0.892955
chr9	106335311	106340567	Acy1	12.6282	17.3544	0.458654	chr9	106335311	106340567	Acy1	10.8822	7.14885	-0.606181
chr19	3986569	3990005	Acy3	0.585129	3.76095	2.68427	chr19	3986569	3990005	Acy3	1.98451	2.2518	0.182301
chr12	86613347	86629388	Acyp1	2.66377	24.8597	3.22227	chr12	86613347	86629388	Acyp1	13.3805	34.613	1.37118
chr11	30405991	30549396	Acyp2	1.67875	25.1521	3.90522	chr11	30405991	30549396	Acyp2	0.528308	11.7143	4.47074
chr2	163552306	163575975	Ada	5.98797	7.67028	0.357212	chr2	163552306	163575975	Ada	4.57526	0.984108	-2.21696
chr2	120963027	120982416	Adal	5.51971	2.59451	-1.08913	chr2	120963027	120982416	Adal	1.25805	0.961762	-0.387434
chr9	70526788	70628036	Adam10	12.4478	21.888	0.814247	chr9	70526788	70628036	Adam10	5.3244	11.708	1.1368
chr7	141074882	141416780	Adam12	2.33382	3.87475	0.731413	chr7	141074882	141416780	Adam12	2.02772	2.67581	0.40012
chr3	89143561	89153950	Adam15	14.436	9.45065	-0.611184	chr3	89143561	89153950	Adam15	12.029	7.83381	-0.618736
chr12	21322252	21379493	Adam17	20.6493	24.7366	0.260554	chr12	21322252	21379493	Adam17	14.483	19.2193	0.408195
chr11	45868003	45960849	Adam19	29.8155	11.9944	-1.31371	chr11	45868003	45960849	Adam19	37.533	19.9816	-0.909488
chr5	121968612	121971704	Adam1a	7.89918	0.939041	-3.07244	chr5	121968612	121971704	Adam1a	4.55633	2.73238	-0.737714
chr12	82459839	82633898	Adam4	1.99194	0.472194	-2.07672	chr12	82459839	82633898	Adam4	2.68693	0.52202	-2.36378
chr7	147164830	147178461	Adam8	7.12965	3.04025	-1.22964	chr7	147164830	147178461	Adam8	7.64401	6.86047	-0.156022
chr8	26060082	26127394	Adam9	17.5717	27.9576	0.669983	chr8	26060082	26127394	Adam9	11.1209	19.5994	0.817533
chr16	85794072	85803358	Adamts1	7.01384	3.99534	-0.811885	chr16	85794072	85803358	Adamts1	11.1642	7.03905	-0.665434
chr17	33661029	33690727	Adamts10	40.7869	4.31777	-3.23975	chr17	33661029	33690727	Adamts10	108.828	27.7057	-1.97379
chr10	60659859	60736167	Adamts14	77.3806	22.5352	-1.77979	chr10	60659859	60736167	Adamts14	134.365	52.7739	-1.34826
chr11	50415586	50621075	Adamts2	4.59451	1.35133	-1.76553	chr11	50415586	50621075	Adamts2	1.97505	4.34939	1.13893
chr15	94098750	94234781	Adamts20	3.67138	1.23878	-1.56741	chr15	94098750	94234781	Adamts20	2.24179	1.34554	-0.73646
chr1	173180259	173192398	Adamts4	16.1936	9.50115	-0.769252	chr1	173180259	173192398	Adamts4	2.04601	2.97877	0.541903
chr16	85858401	85901370	Adamts5	3.89011	1.42127	-1.45263	chr16	85858401	85901370	Adamts5	1.88646	3.76228	0.995923
chr13	105077914	105286775	Adamts6	7.3116	1.3481	-2.43925	chr13	105077914	105286775	Adamts6	8.6017	3.71661	-1.21063
chr9	90057815	90094940	Adamts7	13.4555	6.5325	-1.04249	chr9	90057815	90094940	Adamts7	18.9971	8.91444	-1.09156
chr4	85699818	86074286	Adamtsl1	1.02187	0.172977	-2.56256	chr4	85699818	86074286	Adamtsl1	0.798268	1.07583	0.430507
chr3	95480124	95491840	Adamtsl4	5.71852	1.74903	-1.70909	chr3	95480124	95491840	Adamtsl4	9.25169	4.86855	-0.926226
chr10	79802537	79811193	Adamtsl5	13.0068	1.11818	-3.54004	chr10	79802537	79811193	Adamtsl5	10.5645	12.3054	0.22007
chr3	89518943	89568554	Adar	18.8353	5.0489	-1.8994	chr3	89518943	89568554	Adar	30.6628	13.5281	-1.18053
chr10	76753471	76881018	Adarb1	17.7319	11.2001	-0.662837	chr10	76753471	76881018	Adarb1	12.972	7.33459	-0.822611
chr8	114490797	114516202	Adat1	12.1068	3.55922	-1.76618	chr8	114490797	114516202	Adat1	11.2833	5.31218	-1.08682
chr10	13243647	13283182	Adat2	1.17386	6.52695	2.47514	chr10	13243647	13283182	Adat2	3.60583	1.18356	-1.6072
chr10	80065624	80078528	Adat3	21.2033	8.91415	-1.25012	chr10	80065624	80078528	Adat3	10.6821	3.14655	-1.76336
chr12	89598957	89700170	Adck1	7.73139	9.06527	0.229621	chr12	89598957	89700170	Adck1	12.8027	8.55879	-0.580969
chr6	39523874	39538768	Adck2	3.03187	2.68696	-0.174229	chr6	39523874	39538768	Adck2	5.11351	2.61875	-0.965437
chr15	76406788	76438021	Adck5	22.1068	11.7772	-0.908493	chr15	76406788	76438021	Adck5	30.1578	13.271	-1.18425
chr13	68758919	69138419	Adcy2	2.03861	2.37003	0.217323	chr13	68758919	69138419	Adcy2	3.19602	2.49505	-0.357206
chr12	4133396	4233965	Adcy3	3.94149	6.9962	0.827831	chr12	4133396	4233965	Adcy3	3.47635	4.29933	0.306541
chr15	98420415	98438064	Adcy6	32.3519	11.273	-1.52098	chr15	98420415	98438064	Adcy6	29.518	15.5939	-0.920616
chr8	90796301	90853861	Adcy7	64.5139	24.604	-1.39072	chr8	90796301	90853861	Adcy7	65.8693	26.9386	-1.28993
chr16	4284885	4420498	Adcy9	1.87728	0.896209	-1.06674	chr16	4284885	4420498	Adcy9	3.27129	1.64162	-0.994739
chr6	55401971	55451449	Adcyap1r1	3.44261	2.23663	-0.622174	chr6	55401971	55451449	Adcyap1r1	1.80181	1.94513	0.110419
chr5	34916312	34974957	Add1	36.4509	47.957	0.395788	chr5	34916312	34974957	Add1	34.3671	27.0315	-0.346386
chr19	53214932	53321816	Add3	5.6957	6.11201	0.101775	chr19	53214932	53321816	Add3	2.15402	2.45338	0.187741
chr8	28196312	28233908	Adgra2	7.55516	7.64743	0.0175133	chr8	28196312	28233908	Adgra2	10.0122	9.97005	-0.00608547
chr5	50351189	50450235	Adgra3	12.6426	22.3201	0.820054	chr5	50351189	50450235	Adgra3	7.27406	6.15735	-0.240452
chr8	86239075	86265210	Adgre5	109.307	121.175	0.148707	chr8	86239075	86265210	Adgre5	106.228	67.3207	-0.658036
chr8	97501008	97538108	Adgrg1	4.33898	5.38275	0.310987	chr8	97501008	97538108	Adgrg1	3.65363	3.341	-0.129054
chr8	97541591	97569149	Adgrg3	2.33633	2.50523	0.100699	chr8	97541591	97569149	Adgrg3	2.80306	2.33463	-0.263806
chr8	86423996	86465853	Adgrl1	24.1895	8.58515	-1.49446	chr8	86423996	86465853	Adgrl1	26.8399	26.2955	-0.0295677
chr3	148478549	148617599	Adgrl2	4.36819	2.91807	-0.582018	chr3	148478549	148617599	Adgrl2	1.47404	2.05396	0.478637
chr3	138100163	138118463	Adh5	31.8414	122.449	1.9432	chr3	138100163	138118463	Adh5	33.1504	56.0391	0.757409
chr3	137873680	137902627	Adh7	3.38656	0.427902	-2.98447	chr3	137873680	137902627	Adh7	1.38234	1.00153	-0.464911
chr12	29360071	29367039	Adi1	5.56154	27.6824	2.31541	chr12	29360071	29367039	Adi1	2.98605	10.1123	1.7598
chr1	136311954	136329927	Adipor1	21.6471	47.7064	1.14001	chr1	136311954	136329927	Adipor1	20.4763	24.5732	0.26313
chr6	119303167	119367546	Adipor2	16.0347	16.7964	0.0669567	chr6	119303167	119367546	Adipor2	8.2504	9.53086	0.208141
chr14	21871795	22267791	Adk	8.10412	71.0062	3.13122	chr14	21871795	22267791	Adk	7.85144	18.6987	1.25191
chr7	117771170	117773334	Adm	4.68495	4.37676	-0.0981717	chr7	117771170	117773334	Adm	24.3658	20.0199	-0.28342
chr2	168006464	168055879	Adnp	28.3888	0.495383	-5.84063	chr2	168006464	168055879	Adnp	11.5108	14.5347	0.336516
chr18	80323873	80348221	Adnp2	7.48656	6.07919	-0.300423	chr18	80323873	80348221	Adnp2	9.38412	2.86604	-1.71116
chr10	67007258	67011703	Ado	11.143	16.1944	0.53936	chr10	67007258	67011703	Ado	4.36978	9.12614	1.06245
chr1	136090024	136132034	Adora1	6.94196	0.270338	-4.68251	chr1	136090024	136132034	Adora1	0.354554	1.57629	2.15246
chr11	62062485	62079954	Adora2b	9.88444	21.6867	1.13358	chr11	62062485	62079954	Adora2b	11.5973	20.3002	0.807705
chr9	59139378	59164007	Adpgk	39.0445	22.8871	-0.770586	chr9	59139378	59164007	Adpgk	36.5523	20.3254	-0.846682
chr16	38445478	38452769	Adprh	30.6996	118.604	1.94986	chr16	38445478	38452769	Adprh	26.5069	52.6726	0.990685
chr4	125993594	125998947	Adprhl2	36.3722	24.0574	-0.596354	chr4	125993594	125998947	Adprhl2	43.3578	7.61765	-2.50887
chr11	66851381	66866120	Adprm	10.8568	11.6759	0.104942	chr11	66851381	66866120	Adprm	11.9277	15.3492	0.363848
chr11	43588106	43714739	Adra1b	1.49243	5.24779	1.81404	chr11	43588106	43714739	Adra1b	1.33798	1.72702	0.368229
chr2	131371092	131388233	Adra1d	0.149761	1.37944	3.20335	chr2	131371092	131388233	Adra1d	1.22328	2.3357	0.933104
chr19	56796606	56799640	Adrb1	2.48716	0.957542	-1.37709	chr19	56796606	56799640	Adrb1	0.560761	1.53352	1.45139
chr18	62337366	62339635	Adrb2	30.948	13.1674	-1.23287	chr18	62337366	62339635	Adrb2	9.17427	17.2817	0.913577
chr8	28336247	28340060	Adrb3	4.19084	0.3062	-3.7747	chr8	28336247	28340060	Adrb3	1.38963	1.28618	-0.111606
chr2	179906292	179910988	Adrm1	42.7733	116.72	1.44827	chr2	179906292	179910988	Adrm1	52.5557	33.18	-0.663532
chr15	80778919	80801377	Adsl	16.37	25.5757	0.643717	chr15	80778919	80801377	Adsl	16.256	11.2187	-0.535065
chr1	179693308	179726640	Adss	60.9084	58.1228	-0.0675378	chr1	179693308	179726640	Adss	49.9336	45.375	-0.138112
chr12	113858257	113879566	Adssl1	3.62703	3.12568	-0.21462	chr12	113858257	113879566	Adssl1	0.479102	1.97608	2.04424
chr11	5761868	5778259	Aebp1	45.6886	13.1683	-1.79477	chr11	5761868	5778259	Aebp1	79.2317	47.9383	-0.724898
chr6	140571183	140626993	Aebp2	41.0046	42.1917	0.0411756	chr6	140571183	140626993	Aebp2	32.0804	37.1841	0.212995
chr7	86040812	86056095	Aen	40.418	22.6009	-0.838616	chr7	86040812	86056095	Aen	120.734	46.462	-1.37771
chr5	36235967	36346571	Afap1	14.2682	6.9081	-1.04644	chr5	36235967	36346571	Afap1	7.70446	8.30632	0.108517
chr18	61889915	61946316	Afap1l1	3.33014	2.11256	-0.65659	chr18	61889915	61946316	Afap1l1	4.23518	1.62436	-1.38255
chr19	56986843	57083065	Afap1l2	3.56597	1.01908	-1.80703	chr19	56986843	57083065	Afap1l2	3.33373	3.29313	-0.0176792
chr17	13853442	14042801	Afdn	7.66606	3.78342	-1.01879	chr17	13853442	14042801	Afdn	11.5796	7.81665	-0.566965
chr5	104183180	104284341	Aff1	5.8136	3.98685	-0.544184	chr5	104183180	104284341	Aff1	4.50085	5.11891	0.185639
chr11	53164268	53235332	Aff4	11.5097	7.87933	-0.546709	chr11	53164268	53235332	Aff4	7.7447	8.07402	0.0600776
chr10	42032390	42198371	Afg1l	4.1716	3.77394	-0.144528	chr10	42032390	42198371	Afg1l	3.74529	3.18441	-0.234053
chr8	126001761	126027816	Afg3l1	17.6027	27.5533	0.646429	chr8	126001761	126027816	Afg3l1	20.9109	13.8815	-0.591092
chr18	67564417	67608846	Afg3l2	25.3026	32.31	0.352694	chr18	67564417	67608846	Afg3l2	33.6178	17.6539	-0.929234
chr11	117676832	117701222	Afmid	6.35266	3.53087	-0.847336	chr11	117676832	117701222	Afmid	14.034	5.8903	-1.25251
chr11	20585087	20641559	Aftph	10.2601	6.94819	-0.562336	chr11	20585087	20641559	Aftph	12.6774	11.6861	-0.11747
chr8	54597055	54608776	Aga	9.12861	19.2539	1.07668	chr8	54597055	54608776	Aga	11.673	9.60349	-0.281544
chr1	91351385	91791857	Agap1	7.71125	6.04287	-0.351732	chr1	91351385	91791857	Agap1	5.18423	5.49208	0.0832247
chr10	126515962	126530226	Agap2	5.91581	1.47171	-2.00709	chr10	126515962	126530226	Agap2	6.3001	2.27932	-1.46677
chr5	23957994	24007865	Agap3	43.4392	48.7458	0.166277	chr5	23957994	24007865	Agap3	54.219	36.2571	-0.580533
chr2	90622883	90674594	Agbl2	1.90313	0.382458	-2.315	chr2	90622883	90674594	Agbl2	3.47502	0.699176	-2.31329
chr6	34730431	34809459	Agbl3	6.52021	1.3475	-2.27463	chr6	34730431	34809459	Agbl3	2.47907	3.43078	0.468739
chr5	31191224	31210161	Agbl5	5.64161	3.89184	-0.535653	chr5	31191224	31210161	Agbl5	7.17414	3.52835	-1.02381
chr17	34734794	34737882	Ager	7.06534	0.13767	-5.68148	chr17	34734794	34737882	Ager	12.5433	2.7174	-2.20661
chr1	82836034	82897576	Agfg1	8.76609	9.01998	0.0411909	chr1	82836034	82897576	Agfg1	6.34329	7.12708	0.168079
chr5	138091705	138125981	Agfg2	4.97828	2.74247	-0.860173	chr5	138091705	138125981	Agfg2	2.07998	2.38216	0.195706
chr13	96120637	96145312	Aggf1	7.51743	16.3548	1.12141	chr13	96120637	96145312	Aggf1	9.92543	10.963	0.143445
chr6	40275476	40346761	Agk	7.91813	12.8472	0.698222	chr6	40275476	40346761	Agk	9.91852	6.6954	-0.566955
chr3	116442916	116511084	Agl	4.70565	4.3456	-0.114839	chr3	116442916	116511084	Agl	3.52165	2.28651	-0.623104
chr4	126112255	126145827	Ago1	6.21514	6.01299	-0.0477042	chr4	126112255	126145827	Ago1	6.40043	5.76853	-0.149965
chr15	72932054	73015377	Ago2	3.19864	3.54755	0.149367	chr15	72932054	73015377	Ago2	2.91578	1.79605	-0.699054
chr4	126017921	126106786	Ago3	1.03573	0.401777	-1.36619	chr4	126017921	126106786	Ago3	2.07892	0.250495	-3.05298
chr4	126166786	126210702	Ago4	1.91962	0.782312	-1.295	chr4	126166786	126210702	Ago4	2.71044	1.86616	-0.538452
chr17	34742805	34752916	Agpat1	60.9584	59.1118	-0.0443779	chr17	34742805	34752916	Agpat1	71.4139	34.4318	-1.05246
chr2	26448576	26459937	Agpat2	6.68397	18.1105	1.43805	chr2	26448576	26459937	Agpat2	11.3859	9.96665	-0.192072
chr10	77734307	77814445	Agpat3	11.6052	21.5513	0.893003	chr10	77734307	77814445	Agpat3	11.3765	17.4999	0.621287
chr17	12312149	12412506	Agpat4	12.5625	22.7815	0.858736	chr17	12312149	12412506	Agpat4	17.7158	27.1962	0.618363
chr8	18846278	18884413	Agpat5	14.4196	22.7032	0.654862	chr8	18846278	18884413	Agpat5	6.47384	10.2315	0.660318
chr2	75670233	75769407	Agps	11.1372	10.2722	-0.116642	chr2	75670233	75769407	Agps	7.99479	7.00946	-0.189758
chr4	155539398	155571597	Agrn	14.6377	4.20456	-1.79966	chr4	155539398	155571597	Agrn	22.186	7.55057	-1.55499
chr13	59550895	59658708	Agtpbp1	8.20397	4.34142	-0.918154	chr13	59550895	59658708	Agtpbp1	12.4721	5.12772	-1.28231
chr4	147451169	147462173	Agtrap	2.62433	4.49651	0.776857	chr4	147451169	147462173	Agtrap	1.57069	2.6264	0.741694
chr1	181625167	181734146	Ahctf1	25.5187	13.6453	-0.903155	chr1	181625167	181734146	Ahctf1	22.6474	17.112	-0.404338
chr2	154885047	154900233	Ahcy	45.3662	107.9	1.25001	chr2	154885047	154900233	Ahcy	39.2028	33.4698	-0.228099
chr3	107466037	107499478	Ahcyl1	70.056	65.7175	-0.0922313	chr3	107466037	107499478	Ahcyl1	60.0932	36.5317	-0.718054
chr6	29718442	29862310	Ahcyl2	7.07384	2.94508	-1.26419	chr6	29718442	29862310	Ahcyl2	3.42704	3.20098	-0.0984491
chr4	132567420	132634025	Ahdc1	28.2967	16.4623	-0.781467	chr4	132567420	132634025	Ahdc1	76.0922	30.4041	-1.32349
chr10	20672352	20800235	Ahi1	11.8347	7.32352	-0.69241	chr10	20672352	20800235	Ahi1	13.0257	10.7181	-0.281309
chr19	9063773	9151416	Ahnak	83.4814	57.0384	-0.549522	chr19	9063773	9151416	Ahnak	94.8683	45.7912	-1.05086
chr12	36182650	36219661	Ahr	2.86566	0.290646	-3.30153	chr12	36182650	36219661	Ahr	0.99305	1.11329	0.164893
chr12	88607677	88614902	Ahsa1	59.5059	233.757	1.97391	chr12	88607677	88614902	Ahsa1	33.2769	68.3672	1.03879
chr11	23206894	23398039	Ahsa2	36.1325	36.393	0.0103628	chr11	23206894	23398039	Ahsa2	19.9522	8.81695	-1.1782
chr1_random	249699	297849	Aida	21.2805	45.1002	1.0836	chr1_random	249699	297849	Aida	15.2276	24.5668	0.690024
chr2	31805822	31828962	Aif1l	18.4354	39.1257	1.08564	chr2	31805822	31828962	Aif1l	9.70675	19.2503	0.987824
chrX	45828120	45866740	Aifm1	15.6318	37.7663	1.27262	chrX	45828120	45866740	Aifm1	11.709	12.3905	0.0816222
chr10	61178010	61246612	Aifm2	5.38423	5.24275	-0.0384151	chr10	61178010	61246612	Aifm2	7.33329	5.4428	-0.430112
chr10	13366860	13588763	Aig1	5.83688	20.6976	1.8262	chr10	13366860	13588763	Aig1	3.7638	6.96135	0.887177
chr3	132323461	132504652	Aimp1	17.8851	124.199	2.79583	chr3	132323461	132504652	Aimp1	25.41	58.4418	1.20161
chr5	144578660	144670708	Aimp2	32.5615	83.9689	1.36669	chr5	144578660	144670708	Aimp2	29.8637	32.3663	0.116101
chr19	4099997	4125858	Aip	16.8528	39.0254	1.21143	chr19	4099997	4125858	Aip	16.1633	16.5758	0.0363544
chr17	12875271	13061009	Airn	19.1659	4.76161	-2.00902	chr17	12875271	13061009	Airn	12.7627	5.89148	-1.11523
chr14	55186305	55196498	Ajuba	68.665	37.9038	-0.857232	chr14	55186305	55196498	Ajuba	101.257	49.3568	-1.0367
chr2	32477277	32490578	Ak1	57.7842	85.624	0.567341	chr2	32477277	32490578	Ak1	94.8563	80.9479	-0.22875
chr4	128670467	128688773	Ak2	75.2363	107.357	0.512912	chr4	128670467	128688773	Ak2	64.8133	46.8686	-0.467668
chr19	29064841	29123219	Ak3	9.70092	23.6169	1.28363	chr19	29064841	29123219	Ak3	5.64869	14.0275	1.31227
chr4	101091893	101140376	Ak4	3.36848	4.91058	0.543795	chr4	101091893	101140376	Ak4	0.876994	1.32404	0.59431
chr13	101421297	101436370	Ak6	19.591	51.6269	1.39794	chr13	101421297	101436370	Ak6	6.31779	14.1076	1.15898
chr11	88692105	88742709	Akap1	28.5469	21.0996	-0.436122	chr11	88692105	88742709	Akap1	36.8964	29.5708	-0.319305
chr11	61684808	61743759	Akap10	4.74137	6.49562	0.454164	chr11	61684808	61743759	Akap10	5.03668	3.9457	-0.352193
chr14	78892052	78936667	Akap11	7.48508	6.44271	-0.21635	chr14	78892052	78936667	Akap11	15.104	7.95506	-0.924983
chr10	5987069	6080212	Akap12	1.98384	1.49188	-0.411165	chr10	5987069	6080212	Akap12	2.71075	3.69386	0.446436
chr7	82600419	82899495	Akap13	8.92492	4.051	-1.13956	chr7	82600419	82899495	Akap13	7.01831	8.41731	0.262237
chrX	34148177	34185409	Akap17b	3.42119	1.0952	-1.64331	chrX	34148177	34185409	Akap17b	3.58117	4.0984	0.194629
chr4	57581119	57909856	Akap2	9.71251	18.5351	0.932346	chr4	57581119	57909856	Akap2	5.87021	17.754	1.59666
chr10	24888895	25018969	Akap7	3.38726	3.19193	-0.0856926	chr10	24888895	25018969	Akap7	4.90527	7.4533	0.603546
chr17	32440616	32458183	Akap8	105.963	33.6165	-1.65632	chr17	32440616	32458183	Akap8	155.054	71.0122	-1.12663
chr17	32458368	32487522	Akap8l	41.6615	10.5608	-1.98	chr17	32458368	32487522	Akap8l	59.2494	28.4095	-1.06043
chr5	3928185	4080204	Akap9	3.73476	3.84364	0.0414557	chr5	3928185	4080204	Akap9	7.61374	4.41845	-0.785063
chr7	116847191	116867285	Akip1	8.27539	48.3691	2.54719	chr7	116847191	116867285	Akip1	9.64074	11.0233	0.193337
chr4	123412437	123427542	Akirin1	25.0157	35.7066	0.513359	chr4	123412437	123427542	Akirin1	13.9971	16.6368	0.249248
chr4	34497863	34562191	Akirin2	32.564	84.5718	1.3769	chr4	34497863	34562191	Akirin2	21.9578	50.7496	1.20866
chr4	63028156	63064479	Akna	4.29595	2.26895	-0.920954	chr4	63028156	63064479	Akna	4.34049	3.53226	-0.297266
chr4	116309114	116324279	Akr1a1	85.3496	340.583	1.99655	chr4	116309114	116324279	Akr1a1	41.8795	84.014	1.00439
chr6	34334246	34346949	Akr1b10	11.8428	10.7859	-0.134857	chr6	34334246	34346949	Akr1b10	29.7912	12.546	-1.24765
chr6	34304145	34318461	Akr1b8	80.6594	115.691	0.520367	chr6	34304145	34318461	Akr1b8	120.54	91.3288	-0.400372
chr13	4591735	4608410	Akr1e1	5.00541	18.071	1.85212	chr13	4591735	4608410	Akr1e1	8.77744	4.44807	-0.98062
chr4	138866658	138874701	Akr7a5	15.666	20.011	0.353152	chr4	138866658	138874701	Akr7a5	7.14071	4.21001	-0.762244
chr12	113892031	113913095	Akt1	111.644	170.87	0.613997	chr12	113892031	113913095	Akt1	84.8216	92.7361	0.128699
chr7	52104593	52110791	Akt1s1	62.6576	115.278	0.879561	chr7	52104593	52110791	Akt1s1	77.9969	63.6325	-0.293653
chr7	28376570	28425845	Akt2	24.8864	49.996	1.00645	chr7	28376570	28425845	Akt2	20.6946	19.0867	-0.116692
chr1	178744790	179178898	Akt3	4.61478	4.9551	0.102653	chr1	178744790	179178898	Akt3	6.10681	3.48179	-0.810587
chr8	93593955	93659393	Aktip	21.0887	12.5718	-0.746274	chr8	93593955	93659393	Aktip	7.20779	17.5912	1.28722
chr4	62167017	62181097	Alad	8.61439	9.43168	0.130766	chr4	62167017	62181097	Alad	6.25526	2.87189	-1.12307
chr9	106135785	106150285	Alas1	8.14205	22.2248	1.44871	chr9	106135785	106150285	Alas1	6.8829	6.83784	-0.00947706
chr16	52249108	52453194	Alcam	5.61185	1.97873	-1.5039	chr16	52249108	52453194	Alcam	0.840126	1.72176	1.03521
chr7	52397202	52415435	Aldh16a1	17.0636	14.86	-0.199482	chr7	52397202	52415435	Aldh16a1	20.8239	10.8327	-0.942848
chr19	40624746	40662953	Aldh18a1	22.2409	35.2938	0.666199	chr19	40624746	40662953	Aldh18a1	16.0051	25.0741	0.647664
chr19	20567072	20717953	Aldh1a1	2.60063	3.1978	0.298222	chr19	20567072	20717953	Aldh1a1	1.08699	1.47048	0.435945
chr9	71063595	71144050	Aldh1a2	0.328504	2.26679	2.78666	chr9	71063595	71144050	Aldh1a2	7.22753	27.8874	1.94804
chr10	82950191	82996885	Aldh1l2	7.92124	5.95943	-0.410552	chr10	82950191	82996885	Aldh1l2	6.53246	6.69558	0.0355828
chr5	122016035	122043833	Aldh2	33.5959	63.3443	0.914928	chr5	122016035	122043833	Aldh2	30.9814	28.9878	-0.0959571
chr11	61022243	61031918	Aldh3a1	4.36945	5.84034	0.4186	chr11	61022243	61031918	Aldh3a1	0.511165	2.26297	2.14636
chr11	61036918	61081030	Aldh3a2	9.83329	11.4943	0.225171	chr11	61036918	61081030	Aldh3a2	7.36432	14.3814	0.965575
chr19	3913490	3929778	Aldh3b1	12.2216	17.1481	0.488622	chr19	3913490	3929778	Aldh3b1	8.55709	7.30751	-0.22774
chr4	139178808	139205606	Aldh4a1	9.23376	7.26141	-0.346669	chr4	139178808	139205606	Aldh4a1	21.1593	6.26855	-1.75509
chr13	24997468	25030918	Aldh5a1	2.44891	1.79385	-0.449077	chr13	24997468	25030918	Aldh5a1	0.308241	1.14266	1.89027
chr12	85750017	85791974	Aldh6a1	4.52961	4.4126	-0.0377549	chr12	85750017	85791974	Aldh6a1	4.16224	6.64854	0.675677
chr18	56685389	56747366	Aldh7a1	17.3667	24.7865	0.513224	chr18	56685389	56747366	Aldh7a1	17.7476	14.8019	-0.261839
chr1	169280121	169298661	Aldh9a1	12.4597	10.7835	-0.208433	chr1	169280121	169298661	Aldh9a1	6.33336	7.90922	0.320563
chr7	133938747	133943961	Aldoa	314.974	1530.84	2.28102	chr7	133938747	133943961	Aldoa	211.398	470.685	1.1548
chr16	5233713	5256049	Alg1	14.5578	21.3466	0.552219	chr16	5233713	5256049	Alg1	27.9634	8.12902	-1.78239
chr15	90054741	90060985	Alg10b	5.04004	4.22463	-0.254608	chr15	90054741	90060985	Alg10b	1.96979	2.89071	0.553379
chr8	23171192	23182099	Alg11	10.6618	3.91577	-1.44508	chr8	23171192	23182099	Alg11	4.25944	6.06764	0.510473
chr15	88635672	88649748	Alg12	18.5286	6.57733	-1.49418	chr15	88635672	88649748	Alg12	23.2957	14.0851	-0.725892
chrX	140752508	140808991	Alg13	6.78707	8.36134	0.300947	chrX	140752508	140808991	Alg13	10.3628	6.80596	-0.606538
chr3	120994657	121066012	Alg14	8.67239	15.7858	0.864126	chr3	120994657	121066012	Alg14	2.71611	8.36458	1.62275
chr4	47482704	47487239	Alg2	7.71206	19.9179	1.36888	chr4	47482704	47487239	Alg2	3.65983	10.9191	1.57701
chr16	20605530	20610834	Alg3	12.446	35.9097	1.5287	chr16	20605530	20610834	Alg3	12.129	10.2064	-0.248986
chr3	54539460	54553717	Alg5	16.6789	30.1565	0.854443	chr3	54539460	54553717	Alg5	22.3835	20.0862	-0.156236
chr4	99382320	99430151	Alg6	5.79045	2.72973	-1.08492	chr4	99382320	99430151	Alg6	2.97785	2.35072	-0.341167
chr7	104520126	104540668	Alg8	30.6229	38.0649	0.313848	chr7	104520126	104540668	Alg8	19.4644	17.2118	-0.177438
chr9	50583329	50651744	Alg9	4.60957	17.5704	1.93045	chr9	50583329	50651744	Alg9	5.44341	7.47528	0.457617
chr12	88769027	88813249	Alkbh1	47.3873	7.14164	-2.73017	chr12	88769027	88813249	Alkbh1	30.4542	12.4956	-1.28521
chr5	114573934	114578227	Alkbh2	5.4261	16.571	1.61067	chr5	114573934	114578227	Alkbh2	19.6442	33.4627	0.768452
chr2	93820190	93850887	Alkbh3	24.6488	28.991	0.234087	chr2	93820190	93850887	Alkbh3	29.399	19.3757	-0.601521
chr5	136612014	136617484	Alkbh4	8.82547	6.07107	-0.539722	chr5	136612014	136617484	Alkbh4	16.0279	6.06132	-1.40288
chr11	60351184	60372014	Alkbh5	15.2381	18.6103	0.288417	chr11	60351184	60372014	Alkbh5	5.9523	15.2355	1.35592
chr7	31093771	31099322	Alkbh6	20.0473	18.3021	-0.131399	chr7	31093771	31099322	Alkbh6	11.7223	6.6349	-0.821107
chr17	57136761	57139528	Alkbh7	18.5777	16.7693	-0.147747	chr17	57136761	57139528	Alkbh7	1.65924	6.14926	1.88989
chr9	3335230	3385846	Alkbh8	2.1846	1.51881	-0.524427	chr9	3335230	3385846	Alkbh8	2.74159	0.708066	-1.95306
chr6	85537524	85652745	Alms1	2.03541	1.17862	-0.788225	chr6	85537524	85652745	Alms1	2.89487	1.52284	-0.926734
chr6	116360088	116411196	Alox5	16.171	31.3718	0.956062	chr6	116360088	116411196	Alox5	58.5302	33.0219	-0.825759
chr5	150076579	150099729	Alox5ap	3.11964	20.1663	2.6925	chr5	150076579	150099729	Alox5ap	5.19895	7.42341	0.513863
chr3	127373227	127483445	Alpk1	2.51432	0.271496	-3.21116	chr3	127373227	127483445	Alpk1	2.97909	1.08332	-1.45941
chr7	88202485	88250498	Alpk3	6.57227	2.50577	-1.39114	chr7	88202485	88250498	Alpk3	3.64967	2.21296	-0.721785
chr1	59177778	59294075	Als2	4.88672	4.56889	-0.0970225	chr1	59177778	59294075	Als2	5.23144	2.65831	-0.976697
chr9	110782677	110803034	Als2cl	1.85525	0.187639	-3.30558	chr9	110782677	110803034	Als2cl	2.32867	1.77124	-0.39475
chr2	93482590	93521496	Alx4	3.79696	0.0837647	-5.50236	chr2	93482590	93521496	Alx4	0.123881	1.40645	3.50503
chr11	120455829	120459679	Alyref	71.5703	268.984	1.91009	chr11	120455829	120459679	Alyref	45.667	84.7746	0.892481
chr1	173433608	173434881	Alyref2	15.9847	6.59413	-1.27744	chr1	173433608	173434881	Alyref2	1.98257	5.9234	1.57905
chr15	10911510	10926379	Amacr	24.0089	24.8021	0.0468911	chr15	10911510	10926379	Amacr	17.2756	12.5734	-0.458361
chr2	91570294	91759006	Ambra1	13.464	7.4235	-0.85894	chr2	91570294	91759006	Ambra1	26.9597	10.7278	-1.32944
chr10	40007263	40021994	Amd1	0.0876566	4.80915	5.77777	chr10	40007263	40021994	Amd1	7.63535	0.109315	-6.12613
chr10	40007263	40021994	Amd2	23.9373	23.2343	-0.0430031	chr10	40007263	40021994	Amd2	8.67966	19.0232	1.13205
chr17	24292799	24300700	Amdhd2	22.2497	15.0288	-0.566053	chr17	24292799	24300700	Amdhd2	10.5338	5.19056	-1.02106
chrX	92615652	92640179	Amer1	4.74564	1.6652	-1.5109	chrX	92615652	92640179	Amer1	2.45679	2.72004	0.146852
chr8	96495487	96536540	Amfr	40.8606	47.1725	0.207235	chr8	96495487	96536540	Amfr	20.072	36.185	0.85021
chr3	107989206	107995204	Amigo1	3.85978	3.58935	-0.104797	chr3	107989206	107995204	Amigo1	1.04931	2.04956	0.965871
chr9	107951594	107981706	Amigo3	6.01445	0.791031	-2.92663	chr9	107951594	107981706	Amigo3	6.32213	4.2864	-0.560644
chrX	139285688	139401269	Ammecr1	5.3797	7.75723	0.528017	chrX	139285688	139401269	Ammecr1	2.59819	16.3874	2.65701
chr18	31919477	31943737	Ammecr1l	30.4269	10.4716	-1.53886	chr18	31919477	31943737	Ammecr1l	24.274	23.5196	-0.0455486
chr12	112509306	112514637	Amn	0.638894	1.16937	0.872078	chr12	112509306	112514637	Amn	2.70129	4.76285	0.818176
chr6	149106098	149137234	Amn1	6.10907	10.5019	0.781625	chr6	149106098	149137234	Amn1	7.80759	9.56484	0.292865
chrX	141880966	141922182	Amot	6.68787	2.58245	-1.37281	chrX	141880966	141922182	Amot	1.16477	1.19279	0.0342978
chr9	14346410	14419444	Amotl1	11.5449	10.1258	-0.189218	chr9	14346410	14419444	Amotl1	12.1663	20.8376	0.77629
chr9	102620133	102635747	Amotl2	64.7008	43.6157	-0.568934	chr9	102620133	102635747	Amotl2	74.1933	55.926	-0.407771
chr3	107876976	107890929	Ampd2	39.8359	26.5587	-0.584883	chr3	107876976	107890929	Ampd2	78.2461	31.33	-1.32047
chr7	117911719	117955922	Ampd3	28.6175	11.4002	-1.32784	chr7	117911719	117955922	Ampd3	109.673	39.3629	-1.4783
chr9	108199235	108204633	Amt	20.1716	0.920688	-4.45347	chr9	108199235	108204633	Amt	14.6011	8.96973	-0.702943
chr11	109287259	109299462	Amz2	11.3487	12.7394	0.166771	chr11	109287259	109299462	Amz2	7.37063	6.68717	-0.140393
chr2	128435818	128513131	Anapc1	17.3447	20.029	0.2076	chr2	128435818	128513131	Anapc1	13.5578	10.1547	-0.416979
chr8	82235661	82301220	Anapc10	2.47476	8.94991	1.85459	chr8	82235661	82301220	Anapc10	1.3092	4.2394	1.69517
chr11	120459734	120469512	Anapc11	8.5205	32.0054	1.90931	chr11	120459734	120469512	Anapc11	3.15618	9.13783	1.53367
chr9	102528625	102536574	Anapc13	100.599	416.311	2.04905	chr9	102528625	102536574	Anapc13	43.798	217.347	2.31106
chr7	109029838	109048059	Anapc15	25.3441	51.5195	1.02347	chr7	109029838	109048059	Anapc15	24.6196	17.0138	-0.533106
chr10	59450156	59562738	Anapc16	17.0426	32.7367	0.941761	chr10	59450156	59562738	Anapc16	8.26804	17.6552	1.09447
chr2	25127985	25141436	Anapc2	38.5713	38.9431	0.0138404	chr2	25127985	25141436	Anapc2	48.9975	33.2911	-0.557571
chr5	53225373	53257973	Anapc4	23.0463	33.4557	0.537716	chr5	53225373	53257973	Anapc4	35.3077	30.7406	-0.199835
chr5	123237469	123271351	Anapc5	64.9948	85.2111	0.390718	chr5	123237469	123271351	Anapc5	53.5504	47.5931	-0.170144
chr5	122872452	122894920	Anapc7	20.6672	28.7751	0.477477	chr5	122872452	122894920	Anapc7	18.3225	9.57355	-0.936489
chr14	51710751	51725826	Ang	3.08303	6.01163	0.963406	chr14	51710751	51725826	Ang	6.10599	8.67669	0.506921
chr12	88041451	88068527	Angel1	3.67914	2.65389	-0.471261	chr12	88041451	88068527	Angel1	4.24883	0.915024	-2.21518
chr1	192748986	192770842	Angel2	33.4793	22.0542	-0.602219	chr1	192748986	192770842	Angel2	46.6213	42.293	-0.140572
chr8	18595130	18803188	Angpt2	2.93355	1.28877	-1.18665	chr8	18595130	18803188	Angpt2	2.69301	1.54504	-0.80158
chr2	32988938	33227014	Angptl2	51.3152	91.8838	0.840425	chr2	32988938	33227014	Angptl2	36.1713	43.3549	0.26135
chr17	33911844	33918520	Angptl4	11.3946	7.08583	-0.685339	chr17	33911844	33918520	Angptl4	24.6585	13.8249	-0.834823
chr9	20673085	20684154	Angptl6	10.5196	1.12057	-3.23079	chr9	20673085	20684154	Angptl6	3.78754	2.90472	-0.38286
chr15	27396431	27524662	Ank	17.7182	24.7053	0.47959	chr15	27396431	27524662	Ank	6.6092	16.823	1.34788
chr8	24085307	24260969	Ank1	70.7728	102.537	0.534873	chr8	24085307	24260969	Ank1	59.6683	60.6067	0.0225125
chr3	126624524	127202033	Ank2	16.3347	4.62566	-1.8202	chr3	126624524	127202033	Ank2	5.10716	9.63279	0.915433
chr10	68996455	69490184	Ank3	18.0774	14.7051	-0.297873	chr10	68996455	69490184	Ank3	36.6473	95.1895	1.3771
chr13	97186088	97241174	Ankdd1b	1.36743	1.06234	-0.364217	chr13	97186088	97241174	Ankdd1b	1.69861	1.13678	-0.579406
chr11	72503503	72585648	Ankfy1	10.6757	8.63786	-0.30559	chr11	72503503	72585648	Ankfy1	8.48417	7.35123	-0.206788
chr18	36720256	36818562	Ankhd1	13.9853	7.71234	-0.858674	chr18	36720256	36818562	Ankhd1	16.695	23.4656	0.491135
chr5	3689998	3803124	Ankib1	7.4832	6.9522	-0.106186	chr5	3689998	3803124	Ankib1	9.40915	9.39551	-0.00209214
chr8	73929910	73934441	Ankle1	38.0796	5.8702	-2.69754	chr8	73929910	73934441	Ankle1	15.7544	5.9036	-1.41609
chr5	110660022	110685670	Ankle2	18.9704	9.48739	-0.999665	chr5	110660022	110685670	Ankle2	15.6214	10.1523	-0.621714
chr12	36883710	36923878	Ankmy2	8.80535	5.58656	-0.656419	chr12	36883710	36923878	Ankmy2	5.63729	4.09666	-0.460554
chr13	99033030	99044709	Ankra2	8.97231	9.65507	0.105807	chr13	99033030	99044709	Ankra2	5.1848	5.46184	0.0750989
chr19	36186454	36194334	Ankrd1	801.23	614.27	-0.383344	chr19	36186454	36194334	Ankrd1	1932.95	1654	-0.224851
chr8	11611580	11635757	Ankrd10	379.962	84.6136	-2.16689	chr8	11611580	11635757	Ankrd10	173.722	108.975	-0.672785
chr8	125407721	125566184	Ankrd11	59.292	28.8793	-1.0378	chr8	125407721	125566184	Ankrd11	71.623	87.8419	0.294486
chr17	66316840	66426386	Ankrd12	12.7178	4.0801	-1.64017	chr17	66316840	66426386	Ankrd12	74.5755	51.3952	-0.537068
chr5	115225148	115255829	Ankrd13a	18.0883	22.8111	0.334674	chr5	115225148	115255829	Ankrd13a	14.3823	10.4164	-0.465442
chr11	77283986	77303544	Ankrd13b	28.4775	13.9134	-1.03335	chr11	77283986	77303544	Ankrd13b	53.106	30.2788	-0.810566
chr3	157609963	157670998	Ankrd13c	12.2831	12.7212	0.0505645	chr3	157609963	157670998	Ankrd13c	8.67508	10.2146	0.235691
chr19	4270179	4283137	Ankrd13d	1.51615	0.527288	-1.52375	chr19	4270179	4283137	Ankrd13d	4.84553	2.59094	-0.903179
chr2	11699379	11711950	Ankrd16	33.4895	4.08883	-3.03395	chr2	11699379	11711950	Ankrd16	55.9057	27.6051	-1.01806
chr5	90656190	90795211	Ankrd17	16.9027	20.7209	0.293832	chr5	90656190	90795211	Ankrd17	17.3868	40.9793	1.2369
chr1	36587037	36593401	Ankrd23	10.4147	1.10595	-3.23526	chr1	36587037	36593401	Ankrd23	24.8212	7.56294	-1.71455
chr10	81091284	81110357	Ankrd24	1.45354	0.651187	-1.15843	chr10	81091284	81110357	Ankrd24	2.7988	1.45248	-0.946291
chr6	118451317	118512289	Ankrd26	4.83894	2.8267	-0.775575	chr6	118451317	118512289	Ankrd26	4.46919	3.93233	-0.184631
chr7	36371265	36424256	Ankrd27	15.6534	13.452	-0.21865	chr7	36371265	36424256	Ankrd27	29.2322	13.8869	-1.07383
chr14	32513200	32643601	Ankrd28	38.6922	14.6221	-1.40389	chr14	32513200	32643601	Ankrd28	57.0542	22.4308	-1.34685
chr18	12410865	12464229	Ankrd29	7.35079	2.77648	-1.40464	chr18	12410865	12464229	Ankrd29	1.46297	3.36512	1.20176
chr15	31221234	31297514	Ankrd33b	14.1313	1.73183	-3.02853	chr15	31221234	31297514	Ankrd33b	4.41876	1.4618	-1.59589
chr8	47060881	47085204	Ankrd37	1.28249	6.03835	2.23521	chr8	47060881	47085204	Ankrd37	2.30177	2.75393	0.258751
chr1	36595015	36604097	Ankrd39	3.31264	4.11434	0.312679	chr1	36595015	36604097	Ankrd39	3.07602	0.641257	-2.26209
chr11	94189314	94203161	Ankrd40	33.1	40.4362	0.288817	chr11	94189314	94203161	Ankrd40	23.2454	22.9116	-0.0208644
chr1	54702183	54983231	Ankrd44	1.51523	1.31665	-0.202665	chr1	54702183	54983231	Ankrd44	0.852903	1.21944	0.51576
chr15	36407422	36426546	Ankrd46	14.9244	20.6217	0.466488	chr15	36407422	36426546	Ankrd46	13.8936	14.8204	0.0931669
chr9	14584063	14589017	Ankrd49	21.8421	15.9992	-0.449116	chr9	14584063	14589017	Ankrd49	18.7464	25.6022	0.449652
chr3	38348180	38383772	Ankrd50	6.54621	5.77257	-0.181446	chr3	38348180	38383772	Ankrd50	7.549	6.59316	-0.195315
chr10	127814179	127831062	Ankrd52	10.2217	4.65114	-1.13598	chr10	127814179	127831062	Ankrd52	8.75295	5.26043	-0.734587
chr15	78883523	78893289	Ankrd54	18.9245	14.9268	-0.342343	chr15	78883523	78893289	Ankrd54	21.1633	22.7456	0.104026
chr4	32891009	33037801	Ankrd6	3.87331	1.63777	-1.24184	chr4	32891009	33037801	Ankrd6	4.76814	3.91707	-0.283649
chr17	43671122	43680588	Ankrd66	1.27714	0.413249	-1.62783	chr17	43671122	43680588	Ankrd66	1.54437	0.187529	-3.04183
chr12	112214629	112217250	Ankrd9	8.18652	7.74961	-0.0791272	chr12	112214629	112217250	Ankrd9	6.10738	4.85726	-0.330411
chr17	28046250	28199724	Anks1	8.03231	4.59301	-0.806376	chr17	28046250	28199724	Anks1	17.0475	7.39172	-1.20558
chr10	89336253	90436045	Anks1b	3.98087	0.0913	-5.44633	chr10	89336253	90436045	Anks1b	2.15279	0.974365	-1.14367
chr16	4941419	4964330	Anks3	16.1857	5.81898	-1.47588	chr16	4941419	4964330	Anks3	30.7942	11.6431	-1.40318
chr4	47028540	47070178	Anks6	3.06006	2.14927	-0.509715	chr4	47028540	47070178	Anks6	2.32809	1.33234	-0.805188
chr1	75188733	75207353	Ankzf1	28.5013	7.80537	-1.86849	chr1	75188733	75207353	Ankzf1	39.4572	13.2216	-1.57739
chr9	22135657	22193650	Anln	27.2882	39.4391	0.531348	chr9	22135657	22193650	Anln	8.83497	10.1398	0.198729
chr7	151774453	151924497	Ano1	1.88516	3.02861	0.683964	chr7	151774453	151924497	Ano1	10.3499	5.57079	-0.893662
chr9	122084991	122203541	Ano10	10.4908	10.4655	-0.00348033	chr9	122084991	122203541	Ano10	5.83955	5.34678	-0.127188
chr2	110495357	110790401	Ano3	2.13227	1.19194	-0.83908	chr2	110495357	110790401	Ano3	15.9139	3.20203	-2.31323
chr7	58766398	58854077	Ano5	7.17762	3.06875	-1.22586	chr7	58766398	58854077	Ano5	4.37972	2.2578	-0.955921
chr15	95621273	95805903	Ano6	29.1436	29.1809	0.00184842	chr15	95621273	95805903	Ano6	25.3131	59.8467	1.24139
chr8	73993092	74009966	Ano8	22.9268	7.94902	-1.52819	chr8	73993092	74009966	Ano8	31.4901	13.0937	-1.26602
chr9	62189149	62226609	Anp32a	42.6242	130.804	1.61766	chr9	62189149	62226609	Anp32a	14.3174	47.3734	1.72631
chr4	46463797	46485528	Anp32b	329.922	792.301	1.26392	chr4	46463797	46485528	Anp32b	265.444	1685.53	2.66672
chr3	95733179	95751310	Anp32e	51.9967	134.324	1.36922	chr3	95733179	95751310	Anp32e	15.3062	33.9039	1.14733
chr7	86966688	86993096	Anpep	2.14149	1.34656	-0.669338	chr7	86966688	86993096	Anpep	1.99827	4.62388	1.21035
chr6	87083846	87285769	Antxr1	7.34503	14.4642	0.977643	chr6	87083846	87285769	Antxr1	8.15802	5.97312	-0.449733
chr5	98313706	98460036	Antxr2	10.5855	32.3638	1.61229	chr5	98313706	98460036	Antxr2	11.3506	17.6187	0.634338
chr19	20447923	20465161	Anxa1	164.67	715.837	2.12006	chr19	20447923	20465161	Anxa1	72.467	223.852	1.62715
chr14	26661640	26706290	Anxa11	6.90221	6.54569	-0.0765133	chr14	26661640	26706290	Anxa11	3.31739	1.04925	-1.66068
chr9	69301489	69339592	Anxa2	386.898	1276.18	1.7218	chr9	69301489	69339592	Anxa2	347.87	492.229	0.500785
chr5	97222403	97274987	Anxa3	79.358	65.8737	-0.268673	chr5	97222403	97274987	Anxa3	66.9509	63.2608	-0.0817921
chr6	86686833	86743578	Anxa4	26.3634	62.9557	1.2558	chr6	86686833	86743578	Anxa4	18.0243	39.5437	1.13351
chr3	36347845	36374809	Anxa5	66.1507	171.914	1.37786	chr3	36347845	36374809	Anxa5	70.9304	85.7521	0.273768
chr11	54792454	54846973	Anxa6	118.526	309.763	1.38596	chr11	54792454	54846973	Anxa6	104.528	77.5163	-0.431316
chr14	21274482	21299355	Anxa7	31.0036	49.8744	0.685863	chr14	21274482	21299355	Anxa7	33.4734	39.406	0.235402
chr14	34864315	34915940	Anxa8	4.2832	2.09305	-1.03308	chr14	34864315	34915940	Anxa8	3.19512	8.37841	1.39081
chr3	95086856	95111098	Anxa9	7.14729	1.66356	-2.10313	chr3	95086856	95111098	Anxa9	10.7958	6.96819	-0.63161
chr11	101186376	101191008	Aoc2	5.786	1.00911	-2.51948	chr11	101186376	101191008	Aoc2	11.0939	4.83369	-1.19857
chr13	63066252	63533053	Aopep	175.127	67.067	-1.38473	chr13	63066252	63533053	Aopep	105.164	74.8052	-0.491431
chr1	58086812	58163254	Aox1	11.6727	1.03002	-3.50239	chr1	58086812	58163254	Aox1	25.2431	5.90989	-2.09468
chr3	127509924	127540441	Ap1ar	30.6857	28.9697	-0.0830231	chr3	127509924	127540441	Ap1ar	40.1338	41.4419	0.0462711
chr11	4838758	4942797	Ap1b1	24.9188	33.9855	0.447685	chr11	4838758	4942797	Ap1b1	24.2476	18.3628	-0.401057
chr8	112302482	112388109	Ap1g1	21.1056	12.3914	-0.768289	chr8	112302482	112388109	Ap1g1	13.7589	8.34384	-0.721583
chr14	55713620	55725430	Ap1g2	10.2102	8.85753	-0.205034	chr14	55713620	55725430	Ap1g2	21.7903	11.3079	-0.946353
chr8	74763916	74781285	Ap1m1	36.1264	46.4906	0.363886	chr8	74763916	74781285	Ap1m1	57.1088	28.9843	-0.97844
chr5	137510867	137521978	Ap1s1	49.6598	194.884	1.97246	chr5	137510867	137521978	Ap1s1	38.5671	61.7102	0.678136
chrX	160346948	160371598	Ap1s2	19.4964	26.5403	0.444971	chrX	160346948	160371598	Ap1s2	8.9613	17.1396	0.93555
chr7	52151448	52184860	Ap2a1	29.8618	51.872	0.796654	chr7	52151448	52184860	Ap2a1	41.7889	37.141	-0.170109
chr7	148748078	148818910	Ap2a2	17.4114	23.2614	0.417904	chr7	148748078	148818910	Ap2a2	16.5116	14.4573	-0.191687
chr11	83116198	83218535	Ap2b1	14.4551	27.5787	0.931981	chr11	83116198	83218535	Ap2b1	7.71412	13.111	0.765207
chr16	20535552	20544982	Ap2m1	29.4216	85.4923	1.53892	chr16	20535552	20544982	Ap2m1	24.9488	32.0609	0.361846
chr7	17323792	17334639	Ap2s1	88.3579	266.614	1.59332	chr7	17323792	17334639	Ap2s1	40.9193	172.584	2.07644
chr13	95128914	95336271	Ap3b1	6.59135	16.5937	1.33199	chr13	95128914	95336271	Ap3b1	7.15735	14.1504	0.983347
chr10	80169700	80205020	Ap3d1	31.6287	20.9395	-0.595006	chr10	80169700	80205020	Ap3d1	52.8692	30.4107	-0.797848
chr14	21852963	21871664	Ap3m1	5.61526	18.1188	1.69007	chr14	21852963	21871664	Ap3m1	5.26335	11.2842	1.10025
chr8	23897825	23916126	Ap3m2	6.36185	2.86204	-1.1524	chr8	23897825	23916126	Ap3m2	6.02175	4.61904	-0.382591
chr18	46901529	46950480	Ap3s1	19.3863	57.5939	1.57088	chr18	46901529	46950480	Ap3s1	6.37478	26.3243	2.04595
chr7	87020210	87065526	Ap3s2	8.94625	9.48429	0.0842566	chr7	87020210	87065526	Ap3s2	4.61975	5.09714	0.141873
chr3	103613439	103625948	Ap4b1	21.6661	10.6645	-1.02263	chr3	103613439	103625948	Ap4b1	24.3275	15.3076	-0.66834
chr2	126834446	126895550	Ap4e1	14.5552	4.74546	-1.61691	chr2	126834446	126895550	Ap4e1	17.209	8.18752	-1.07166
chr5	138613248	138628679	Ap4m1	23.582	8.4186	-1.48603	chr5	138613248	138628679	Ap4m1	15.6425	6.0956	-1.35963
chr12	52709527	52839920	Ap4s1	6.41477	13.6694	1.09148	chr12	52709527	52839920	Ap4s1	11.4446	13.9564	0.286264
chr19	5568023	5571261	Ap5b1	6.47307	1.59028	-2.02517	chr19	5568023	5571261	Ap5b1	1.23094	1.20762	-0.0275923
chr14	49631818	49710415	Ap5m1	7.48716	4.31522	-0.794982	chr14	49631818	49710415	Ap5m1	5.7398	4.29241	-0.419212
chr2	131036095	131039250	Ap5s1	19.7949	26.0006	0.393421	chr2	131036095	131039250	Ap5s1	17.5997	21.9025	0.315547
chr5	142939884	142954669	Ap5z1	8.02779	2.9713	-1.43391	chr5	142939884	142954669	Ap5z1	14.8325	6.20647	-1.25692
chr10	90452055	90545488	Apaf1	11.4979	6.16381	-0.899476	chr10	90452055	90545488	Apaf1	15.9558	7.43862	-1.10097
chr10	80730916	80754326	Apba3	18.3672	32.1507	0.80772	chr10	80730916	80754326	Apba3	30.8034	11.5212	-1.41879
chr7	112706978	112730167	Apbb1	6.04299	9.08944	0.588929	chr7	112706978	112730167	Apbb1	5.91568	3.17214	-0.899087
chr2	22629846	22731173	Apbb1ip	3.73188	4.15117	0.153618	chr2	22629846	22731173	Apbb1ip	2.64752	4.99607	0.916155
chr5	66689963	67010056	Apbb2	17.9438	6.51338	-1.46201	chr5	66689963	67010056	Apbb2	8.48052	11.2905	0.412884
chr18	36830807	36843516	Apbb3	28.6481	3.26546	-3.13308	chr18	36830807	36843516	Apbb3	35.0623	11.7804	-1.57353
chr18	34367428	34481844	Apc	8.99136	5.72466	-0.651351	chr18	34367428	34481844	Apc	9.31388	5.45104	-0.77285
chr9	107987744	107996811	Apeh	18.9117	16.1	-0.232214	chr9	107987744	107996811	Apeh	18.6692	14.2858	-0.386077
chr14	51544623	51546863	Apex1	69.0131	201.622	1.54671	chr14	51544623	51546863	Apex1	46.51	69.0607	0.570325
chrX	147006049	147078421	Apex2	13.9842	13.2057	-0.0826379	chrX	147006049	147078421	Apex2	16.9923	11.03	-0.623446
chr3	95697843	95708608	Aph1a	14.0946	31.8342	1.17544	chr3	95697843	95708608	Aph1a	9.26836	16.6875	0.848382
chr9	66623293	66643230	Aph1b	2.98555	1.66424	-0.843135	chr9	66623293	66643230	Aph1b	0.504218	1.09455	1.11822
chr2	94251883	94278343	Api5	19.8404	49.4485	1.31749	chr2	94251883	94278343	Api5	12.0552	24.254	1.00856
chr2	102913831	102932806	Apip	10.0748	32.5708	1.69283	chr2	102913831	102932806	Apip	6.14329	12.7717	1.05586
chr6	87578418	87622162	Aplf	3.47174	3.63638	0.0668412	chr6	87578418	87622162	Aplf	1.85139	2.90835	0.651592
chrX	45378322	45388030	Apln	1.58237	3.73193	1.23783	chrX	45378322	45388030	Apln	0.643969	1.34101	1.05825
chr7	31219998	31230601	Aplp1	3.74081	3.17402	-0.237041	chr7	31219998	31230601	Aplp1	0.155118	2.65195	4.09562
chr9	30957141	31019433	Aplp2	23.4019	47.0784	1.00844	chr9	30957141	31019433	Aplp2	14.9781	19.9637	0.414519
chr2	150408816	150434303	Apmap	13.7814	20.07	0.542315	chr2	150408816	150434303	Apmap	12.1884	10.4742	-0.218667
chr6	122527809	122552462	Apobec1	5.28415	3.07508	-0.781045	chr6	122527809	122552462	Apobec1	15.9133	11.4401	-0.476135
chr17	48558555	48572053	Apobec2	3.84353	15.483	2.01019	chr17	48558555	48572053	Apobec2	0.786014	3.5486	2.17462
chr15	79719961	79738859	Apobec3	7.59042	7.68082	0.0170799	chr15	79719961	79738859	Apobec3	3.93883	0.966881	-2.02636
chr7	20281592	20284537	Apoe	37.3657	18.6047	-1.00604	chr7	20281592	20284537	Apoe	68.3641	30.4457	-1.167
chr15	76845916	76887538	Apol6	13.3497	0.0917827	-7.18437	chr15	76845916	76887538	Apol6	0.20353	1.70879	3.06966
chr15	77578228	77587440	Apol8	1.67685	0.494573	-1.7615	chr15	77578228	77587440	Apol8	2.37619	2.17108	-0.130235
chr15	77234218	77241510	Apol9a	5.71202	2.24435	-1.3477	chr15	77234218	77241510	Apol9a	1.29027	0.828887	-0.638427
chr15	77559501	77566812	Apol9b	1.59207	3.37017	1.08192	chr15	77559501	77566812	Apol9b	1.65728	3.41943	1.04494
chrX	91612448	91662431	Apoo	5.2209	60.2179	3.52782	chrX	91612448	91662431	Apoo	2.37557	18.1985	2.93747
chrX	109424960	109486364	Apool	3.68025	31.2904	3.08784	chrX	109424960	109486364	Apool	4.09137	14.6546	1.8407
chr12	112951479	112993266	Apopt1	4.40795	26.5404	2.59001	chr12	112951479	112993266	Apopt1	11.0333	12.1644	0.140798
chr16	84954680	85173952	App	36.005	87.4667	1.28054	chr16	84954680	85173952	App	19.6175	37.0333	0.91668
chr11	85004811	85048622	Appbp2	6.19708	11.2038	0.854322	chr11	85004811	85048622	Appbp2	3.86789	8.89883	1.20207
chr14	27732173	27783737	Appl1	5.87243	7.22826	0.299692	chr14	27732173	27783737	Appl1	5.96174	8.85806	0.571256
chr10	83062778	83111409	Appl2	11.8962	2.73087	-2.12307	chr10	83062778	83111409	Appl2	19.3703	8.72437	-1.15073
chr8	125098536	125100807	Aprt	101.531	410.07	2.01395	chr8	125098536	125100807	Aprt	95.68	153.109	0.678266
chr4	40629110	40650227	Aptx	4.50059	2.81463	-0.67717	chr4	40629110	40650227	Aptx	3.72907	2.35892	-0.660693
chr6	55286292	55298549	Aqp1	4.6543	7.58574	0.704725	chr6	55286292	55298549	Aqp1	1.10295	0.980107	-0.170352
chr15	99421458	99425260	Aqp5	43.5987	2.36619	-4.20365	chr15	99421458	99425260	Aqp5	3.92324	15.1372	1.94798
chr4	40980106	40995169	Aqp7	14.2125	0.133436	-6.73487	chr4	40980106	40995169	Aqp7	3.19425	2.06386	-0.630132
chr2	113926896	114001075	Aqr	9.86156	17.665	0.841006	chr2	113926896	114001075	Aqr	11.3554	7.23088	-0.651137
chrX	95344095	95518557	Ar	4.40152	2.36845	-0.894061	chrX	95344095	95518557	Ar	2.25674	4.47675	0.988215
chrX	20425668	20498044	Araf	51.0159	31.5278	-0.694323	chrX	20425668	20498044	Araf	98.8365	46.6806	-1.08222
chr7	108496582	108561100	Arap1	8.30501	7.37833	-0.170689	chr7	108496582	108561100	Arap1	17.0281	9.15644	-0.895056
chr5	62993684	63157416	Arap2	1.31865	0.696931	-0.91997	chr5	62993684	63157416	Arap2	2.29136	2.01815	-0.183165
chr15	74499510	74503000	Arc	1.02052	1.21176	0.247804	chr15	74499510	74503000	Arc	0.649533	1.09313	0.750994
chr9	44550227	44575891	Arcn1	19.4695	58.1716	1.5791	chr9	44550227	44575891	Arcn1	10.0831	21.7077	1.10626
chr5	91568624	91577458	Areg	4.66417	13.6148	1.54548	chr5	91568624	91577458	Areg	8.72632	11.524	0.401198
chr12	86259090	86311799	Arel1	13.412	8.28477	-0.694995	chr12	86259090	86311799	Arel1	9.53506	8.1473	-0.226919
chr11	59024913	59041769	Arf1	132.332	413.795	1.64476	chr11	59024913	59041769	Arf1	78.5267	153.002	0.962292
chr11	103828038	103846664	Arf2	16.1842	28.6222	0.82255	chr11	103828038	103846664	Arf2	16.6265	22.5824	0.441711
chr15	98568054	98593549	Arf3	23.3415	40.5111	0.795416	chr15	98568054	98593549	Arf3	9.68503	18.4888	0.93282
chr14	27457619	27476328	Arf4	44.4874	194.424	2.12774	chr14	27457619	27476328	Arf4	19.463	55.5767	1.51374
chr6	28373603	28376602	Arf5	47.1963	195.477	2.05025	chr6	28373603	28376602	Arf5	58.0239	106.741	0.879395
chr12	70473136	70476967	Arf6	38.065	88.9163	1.22398	chr12	70473136	70476967	Arf6	22.2529	49.3707	1.14967
chr2	180701929	180717231	Arfgap1	54.5807	23.5994	-1.20964	chr2	180701929	180717231	Arfgap1	33.4265	22.9937	-0.53975
chr2	91105271	91284871	Arfgap2	32.324	26.7244	-0.274448	chr2	91105271	91284871	Arfgap2	35.5606	21.6054	-0.718887
chr15	83130169	83180677	Arfgap3	12.0854	16.0078	0.405514	chr15	83130169	83180677	Arfgap3	12.0347	15.9518	0.406523
chr1	10127587	10222751	Arfgef1	11.3857	10.4765	-0.120059	chr1	10127587	10222751	Arfgef1	10.0788	10.0851	0.000898296
chr2	166631080	166723551	Arfgef2	7.50167	5.03454	-0.575352	chr2	166631080	166723551	Arfgef2	7.11332	4.71874	-0.592121
chr3	84300014	84388538	Arfip1	15.6369	25.4963	0.705334	chr3	84300014	84388538	Arfip1	19.2356	23.227	0.27202
chr7	112782714	112788930	Arfip2	22.7444	10.2196	-1.15418	chr7	112782714	112788930	Arfip2	37.0387	13.733	-1.43139
chr2	181092394	181115498	Arfrp1	32.0981	14.7937	-1.1175	chr2	181092394	181115498	Arfrp1	39.458	20.4534	-0.947976
chr8	8666575	8690537	Arglu1	146.787	72.1886	-1.02388	chr8	8666575	8690537	Arglu1	107.135	92.6981	-0.208814
chr2	91490274	91512477	Arhgap1	13.367	20.7242	0.632646	chr2	91490274	91512477	Arhgap1	11.376	12.1307	0.0926728
chr8	79774264	80042477	Arhgap10	11.503	14.9623	0.379316	chr8	79774264	80042477	Arhgap10	11.1696	5.70361	-0.969636
chr2	113671649	113688818	Arhgap11a	33.3748	25.0982	-0.411172	chr2	113671649	113688818	Arhgap11a	10.2176	12.5862	0.30079
chr18	6024447	6136096	Arhgap12	8.84447	4.72672	-0.903937	chr18	6024447	6136096	Arhgap12	7.61855	5.09004	-0.581839
chr7	130422662	130513429	Arhgap17	17.6344	11.4449	-0.623691	chr7	130422662	130513429	Arhgap17	16.2787	9.80025	-0.732091
chr10	26492317	26638454	Arhgap18	2.72685	2.93121	0.104257	chr10	26492317	26638454	Arhgap18	1.8456	0.668192	-1.46575
chr19	41841077	41876574	Arhgap19	7.87004	5.96849	-0.399006	chr19	41841077	41876574	Arhgap19	1.51135	0.767947	-0.976763
chr2	20769545	20889348	Arhgap21	15.1249	9.22073	-0.713971	chr2	20769545	20889348	Arhgap21	15.6747	8.95237	-0.8081
chr14	34030008	34183122	Arhgap22	110.989	68.6136	-0.693845	chr14	34030008	34183122	Arhgap22	179.434	90.2697	-0.991137
chr11	97311473	97363714	Arhgap23	18.8219	14.2452	-0.40193	chr11	97311473	97363714	Arhgap23	32.6264	20.9531	-0.638872
chr5	102910409	103326956	Arhgap24	7.70243	11.8319	0.619295	chr5	102910409	103326956	Arhgap24	5.3803	4.60002	-0.226046
chr11	103192797	103225006	Arhgap27	8.071	1.50571	-2.42231	chr11	103192797	103225006	Arhgap27	15.251	3.79668	-2.0061
chr17	68192047	68353448	Arhgap28	9.09724	7.83603	-0.215306	chr17	68192047	68353448	Arhgap28	12.942	10.4234	-0.312227
chr3	121656146	121719595	Arhgap29	20.9794	16.9814	-0.305016	chr3	121656146	121719595	Arhgap29	26.8565	15.4382	-0.798773
chr16	38598455	38713148	Arhgap31	2.6934	2.86582	0.0895161	chr16	38598455	38713148	Arhgap31	2.25754	1.78805	-0.336366
chr9	31824209	32072350	Arhgap32	2.83758	1.64632	-0.78542	chr9	31824209	32072350	Arhgap32	1.82227	0.872769	-1.06207
chr7	31307244	31320079	Arhgap33	7.45619	1.10643	-2.75253	chr7	31307244	31320079	Arhgap33	6.64423	3.36692	-0.980672
chr7	17079821	17217992	Arhgap35	12.106	19.1531	0.66185	chr7	17079821	17217992	Arhgap35	15.4567	14.0016	-0.142642
chr15	76554414	76648596	Arhgap39	5.21401	2.89254	-0.850057	chr15	76554414	76648596	Arhgap39	9.00681	5.65237	-0.67216
chr9	8992506	9260885	Arhgap42	5.72144	3.34538	-0.774207	chr9	8992506	9260885	Arhgap42	8.35075	3.94942	-1.08027
chr11	64792536	64976463	Arhgap44	7.43224	1.72203	-2.10969	chr11	64792536	64976463	Arhgap44	4.31999	3.63818	-0.24781
chr12	53617063	53668838	Arhgap5	5.56015	5.05426	-0.137624	chr12	53617063	53668838	Arhgap5	15.4075	12.9684	-0.248632
chrX	165233030	165742372	Arhgap6	1.06656	0.371026	-1.52337	chrX	165233030	165742372	Arhgap6	1.43963	0.699733	-1.04082
chr11	120439412	120442938	Arhgdia	127.257	561.928	2.14264	chr11	120439412	120442938	Arhgdia	99.7927	162.926	0.707214
chr6	136872180	136890420	Arhgdib	6.70862	22.7402	1.76115	chr6	136872180	136890420	Arhgdib	5.08673	11.4004	1.16427
chr17	26336127	26338295	Arhgdig	5.93004	31.0353	2.38779	chr17	26336127	26338295	Arhgdig	7.21403	20.5644	1.51127
chr7	25688004	25711610	Arhgef1	52.8992	35.2212	-0.5868	chr7	25688004	25711610	Arhgef1	81.3353	37.3052	-1.12451
chr8	14911662	15001085	Arhgef10	8.47029	4.98649	-0.764385	chr8	14911662	15001085	Arhgef10	10.253	6.71879	-0.609776
chr4	140070399	140221820	Arhgef10l	15.9341	10.8583	-0.553325	chr4	140070399	140221820	Arhgef10l	7.32092	9.21559	0.332051
chr3	87421480	87552545	Arhgef11	9.04604	6.51856	-0.472733	chr3	87421480	87552545	Arhgef11	7.87118	3.4708	-1.18131
chr9	42771924	42913801	Arhgef12	11.5881	14.0423	0.277136	chr9	42771924	42913801	Arhgef12	12.4021	11.417	-0.119397
chr7	108018259	108080675	Arhgef17	5.82539	5.14949	-0.177927	chr7	108018259	108080675	Arhgef17	6.41993	4.01463	-0.677291
chr8	3353436	3456601	Arhgef18	10.0021	4.04955	-1.30447	chr8	3353436	3456601	Arhgef18	9.42206	3.05024	-1.62712
chr4	140798798	140813477	Arhgef19	17.4818	6.46011	-1.43622	chr4	140798798	140813477	Arhgef19	14.3774	7.99443	-0.846732
chr3	88420128	88451974	Arhgef2	193.591	86.6229	-1.16019	chr3	88420128	88451974	Arhgef2	148.906	79.1391	-0.911943
chr10	126619576	126627139	Arhgef25	57.2115	12.6374	-2.17861	chr10	126619576	126627139	Arhgef25	105.926	49.1614	-1.10746
chr13	98668549	98976120	Arhgef28	2.34976	0.760569	-1.62736	chr13	98668549	98976120	Arhgef28	1.34228	0.854746	-0.651121
chr14	27957178	28217097	Arhgef3	3.21379	1.44596	-1.15224	chr14	27957178	28217097	Arhgef3	1.19161	1.02871	-0.212072
chr4	43509015	43526597	Arhgef39	16.3465	6.14125	-1.41238	chr4	43509015	43526597	Arhgef39	6.62893	8.07014	0.283816
chr1	34735026	34869583	Arhgef4	2.99853	1.16869	-1.35936	chr1	34735026	34869583	Arhgef4	7.95875	2.35825	-1.75483
chr14	52604507	52640408	Arhgef40	25.5847	17.1739	-0.575067	chr14	52604507	52640408	Arhgef40	33.3866	15.8234	-1.07721
chr6	43215642	43239319	Arhgef5	8.79788	5.07284	-0.794362	chr6	43215642	43239319	Arhgef5	9.31044	4.73035	-0.976902
chrX	54484661	54591906	Arhgef6	2.75068	3.28921	0.257953	chrX	54484661	54591906	Arhgef6	6.16596	4.75508	-0.374857
chr8	11728057	11835217	Arhgef7	23.5287	20.5908	-0.192422	chr8	11728057	11835217	Arhgef7	16.2596	12.2123	-0.412949
chr4	133234922	133312684	Arid1a	44.7665	30.2912	-0.563522	chr4	133234922	133312684	Arid1a	42.7124	51.1519	0.260133
chr17	4995073	5347656	Arid1b	6.30878	5.63351	-0.163329	chr17	4995073	5347656	Arid1b	4.63937	13.8972	1.58279
chr15	96117952	96235894	Arid2	17.0128	9.82517	-0.792065	chr15	96117952	96235894	Arid2	15.5986	18.6827	0.260285
chr10	79389787	79417763	Arid3a	5.06862	0.672815	-2.91331	chr10	79389787	79417763	Arid3a	3.50245	2.93422	-0.25539
chr9	57638315	57682041	Arid3b	2.39587	0.312514	-2.93856	chr9	57638315	57682041	Arid3b	1.28464	0.348568	-1.88186
chr12	72116953	72200338	Arid4a	5.75663	6.76655	0.233197	chr12	72116953	72200338	Arid4a	11.208	16.4633	0.554722
chr13	14156050	14291870	Arid4b	22.6659	11.3042	-1.00367	chr13	14156050	14291870	Arid4b	24.8915	36.4105	0.548704
chr1	36364577	36380874	Arid5a	14.0198	7.41306	-0.91933	chr1	36364577	36380874	Arid5a	12.3517	8.28273	-0.576532
chr10	67558340	67741474	Arid5b	7.08408	4.54447	-0.640467	chr10	67558340	67741474	Arid5b	4.72578	4.88997	0.0492713
chr9	59236360	59334181	Arih1	21.8944	20.1743	-0.118045	chr9	59236360	59334181	Arih1	16.5202	9.98782	-0.725989
chr9	108505273	108556012	Arih2	16.5886	15.916	-0.0597131	chr9	108505273	108556012	Arih2	20.2769	11.234	-0.851968
chr10	88194158	88205947	Arl1	34.4794	107.46	1.63999	chr10	88194158	88205947	Arl1	16.3102	9.10871	-0.840458
chr13	54676373	54682489	Arl10	6.80795	2.33941	-1.54107	chr13	54676373	54682489	Arl10	3.57591	0.504237	-2.82614
chr16	62793498	62846866	Arl13b	6.40962	5.9067	-0.117886	chr16	62793498	62846866	Arl13b	6.98054	9.50402	0.445199
chr2	106802685	106814554	Arl14ep	26.5083	13.9165	-0.929645	chr2	106802685	106814554	Arl14ep	13.743	14.1444	0.0415284
chr13	114584715	114947669	Arl15	3.1204	6.40301	1.03702	chr13	114584715	114947669	Arl15	1.26389	3.74335	1.56646
chr11	120319442	120328914	Arl16	16.1884	9.60141	-0.753644	chr11	120319442	120328914	Arl16	6.14552	5.28459	-0.217746
chr19	6134388	6141137	Arl2	30.1275	54.1021	0.844602	chr19	6134388	6141137	Arl2	23.7581	28.4171	0.258342
chr8	97190499	97198357	Arl2bp	16.5447	45.0126	1.44396	chr8	97190499	97198357	Arl2bp	16.3604	24.6496	0.591357
chr19	46605598	46647672	Arl3	6.40046	70.1118	3.45341	chr19	46605598	46647672	Arl3	4.66864	11.9677	1.35807
chr12	40759877	40764574	Arl4a	4.57456	2.29467	-0.995347	chr12	40759877	40764574	Arl4a	1.51423	2.16412	0.515193
chr1	90594800	90598766	Arl4c	38.4081	48.2044	0.327752	chr1	90594800	90598766	Arl4c	31.7342	30.2839	-0.0674874
chr11	101526854	101529146	Arl4d	12.545	14.7238	0.231029	chr11	101526854	101529146	Arl4d	7.65638	8.42641	0.138256
chr2	52253470	52280394	Arl5a	9.51175	14.7525	0.633173	chr2	52253470	52280394	Arl5a	3.78974	4.66098	0.298532
chr2	14976946	15004083	Arl5b	4.71209	2.74294	-0.780643	chr2	14976946	15004083	Arl5b	2.93193	2.37475	-0.304074
chr16	59612774	60605357	Arl6	7.24598	14.7962	1.02998	chr16	59612774	60605357	Arl6	2.53617	16.2746	2.6819
chr7	125262403	125273139	Arl6ip1	64.5592	205.091	1.66757	chr7	125262403	125273139	Arl6ip1	16.0374	73.9871	2.20583
chr5	124566116	124568204	Arl6ip4	34.6076	88.1076	1.34818	chr5	124566116	124568204	Arl6ip4	27.7102	46.5625	0.748749
chr6	97160785	97183309	Arl6ip5	128.04	424.734	1.72997	chr6	97160785	97183309	Arl6ip5	75.0924	142.6	0.925231
chr2	53051117	53078255	Arl6ip6	11.7074	25.2907	1.11119	chr2	53051117	53078255	Arl6ip6	5.74052	14.793	1.36566
chr1	137043410	137052845	Arl8a	49.1963	57.4759	0.224407	chr1	137043410	137052845	Arl8a	93.8639	88.4925	-0.0850161
chr6	108733052	108773717	Arl8b	18.458	33.7707	0.871527	chr6	108733052	108773717	Arl8b	6.48302	11.0545	0.769898
chr3	19031401	19063095	Armc1	10.9208	20.5591	0.912701	chr3	19031401	19063095	Armc1	5.97025	12.7878	1.09891
chr5	21151823	21168517	Armc10	13.9666	24.5231	0.812159	chr5	21151823	21168517	Armc10	9.50806	8.25864	-0.203247
chr7	135377964	135388614	Armc5	12.441	9.59168	-0.375249	chr7	135377964	135388614	Armc5	17.8491	10.576	-0.755052
chr8	72744091	72787004	Armc6	14.7083	10.2544	-0.520387	chr8	72744091	72787004	Armc6	11.7693	4.49516	-1.38859
chr11	115336980	115354675	Armc7	8.00586	3.87843	-1.04558	chr11	115336980	115354675	Armc7	2.74644	4.77388	0.797598
chr9	99356661	99469318	Armc8	11.4017	8.19137	-0.477072	chr9	99356661	99469318	Armc8	11.6712	8.89857	-0.39131
chr1	88051354	88174859	Armc9	3.00954	1.98681	-0.599087	chr1	88051354	88174859	Armc9	6.32312	2.05199	-1.62361
chrX	131252476	131256451	Armcx1	10.6113	5.45214	-0.960708	chrX	131252476	131256451	Armcx1	6.27542	6.92137	0.141346
chrX	131338680	131343760	Armcx2	36.7627	55.8441	0.603162	chrX	131338680	131343760	Armcx2	21.1083	27.4528	0.379143
chrX	131291090	131295995	Armcx3	7.46094	6.10957	-0.288286	chrX	131291090	131295995	Armcx3	5.07229	2.42043	-1.06738
chrX	131221057	131232311	Armcx4	3.87184	2.82423	-0.455164	chrX	131221057	131232311	Armcx4	1.16563	1.21828	0.0637349
chrX	132277230	132338007	Armcx5	5.17668	4.41366	-0.230052	chrX	132277230	132338007	Armcx5	5.23361	6.26214	0.25885
chrX	131282993	131285958	Armcx6	4.69267	4.57284	-0.0373203	chrX	131282993	131285958	Armcx6	2.27912	3.76906	0.72573
chr19	45892633	46087876	Armh3	2.64987	2.93269	0.146302	chr19	45892633	46087876	Armh3	2.89288	3.631	0.327861
chr10	5891400	5913936	Armt1	19.6463	16.4632	-0.255012	chr10	5891400	5913936	Armt1	8.52166	7.09358	-0.26462
chr3	95238311	95301161	Arnt	15.6157	8.25721	-0.919275	chr3	95238311	95301161	Arnt	9.74428	8.45585	-0.204606
chr7	91394784	91558548	Arnt2	2.86542	3.25335	0.183178	chr7	91394784	91558548	Arnt2	1.3908	1.47301	0.0828499
chr7	120350978	120457640	Arntl	7.90169	5.42429	-0.542726	chr7	120350978	120457640	Arntl	12.974	6.64281	-0.965761
chr6	146754051	146782051	Arntl2	2.52046	0.507855	-2.3112	chr6	146754051	146782051	Arntl2	8.66236	1.49657	-2.5331
chr5	145844737	145869625	Arpc1a	21.0235	63.3032	1.59027	chr5	145844737	145869625	Arpc1a	21.9981	50.3438	1.19444
chr5	145875124	145889055	Arpc1b	80.8801	332.522	2.03959	chr5	145875124	145889055	Arpc1b	93.4848	309.434	1.72683
chr1	74283090	74314783	Arpc2	74.5354	351.438	2.23727	chr1	74283090	74314783	Arpc2	67.2696	169.19	1.33062
chr5	122841886	122856190	Arpc3	33.5714	186.724	2.4756	chr5	122841886	122856190	Arpc3	19.7799	43.0281	1.12125
chr6	113328106	113364585	Arpc4	25.9686	117.174	2.17382	chr6	113328106	113364585	Arpc4	20.1219	55.6978	1.46885
chr1	154613671	154622710	Arpc5	33.2299	85.3111	1.36025	chr1	154613671	154622710	Arpc5	34.8372	63.3586	0.862913
chr2	38863658	38871392	Arpc5l	55.6049	59.18	0.0898979	chr2	38863658	38871392	Arpc5l	35.159	44.9396	0.354096
chr7	87070244	87080150	Arpin	6.7434	24.8126	1.87952	chr7	87070244	87080150	Arpin	4.14935	2.95347	-0.490473
chr9	74885420	74908120	Arpp19	48.8932	185.588	1.9244	chr9	74885420	74908120	Arpp19	17.2039	90.8232	2.40033
chr9	111967594	112251429	Arpp21	16.7022	8.82259	-0.920767	chr9	111967594	112251429	Arpp21	8.7377	5.56393	-0.651149
chr7	106683995	106755281	Arrb1	1.334	0.509257	-1.38929	chr7	106683995	106755281	Arrb1	1.31076	0.631221	-1.05418
chr11	70246081	70254330	Arrb2	30.1986	16.3126	-0.888497	chr11	70246081	70254330	Arrb2	21.6112	14.3758	-0.588138
chr2	24780871	24790801	Arrdc1	14.5713	6.18326	-1.23669	chr2	24780871	24790801	Arrdc1	11.856	6.5869	-0.84795
chr8	73359036	73363619	Arrdc2	7.46527	1.78631	-2.06321	chr8	73359036	73363619	Arrdc2	5.6453	4.48111	-0.333194
chr13	81022644	81035303	Arrdc3	8.79493	3.39089	-1.37501	chr13	81022644	81035303	Arrdc3	9.51344	7.55805	-0.331954
chr7	75881879	75894124	Arrdc4	1.2197	1.27164	0.0601657	chr7	75881879	75894124	Arrdc4	1.85391	0.167532	-3.46806
chr15	89302906	89315281	Arsa	2.89903	3.56923	0.300043	chr15	89302906	89315281	Arsa	4.22771	2.14944	-0.975917
chr13	94541633	94712971	Arsb	1.13339	4.41759	1.96262	chr13	94541633	94712971	Arsb	0.28131	2.13293	2.92261
chr11	109301391	109434643	Arsg	1.78298	0.857906	-1.0554	chr11	109301391	109434643	Arsg	2.23357	1.90822	-0.227126
chr3	126066769	126143292	Arsj	2.73245	2.48662	-0.136008	chr3	126066769	126143292	Arsj	2.16313	1.13518	-0.9302
chr13	76197869	76236108	Arsk	3.60198	2.21999	-0.698235	chr13	76197869	76236108	Arsk	1.10173	1.37845	0.323269
chr5	92760852	92843653	Art3	1.10252	3.99365	1.8569	chr5	92760852	92843653	Art3	3.69468	5.25982	0.509565
chr8	127246065	127262024	Arv1	6.04537	1.61967	-1.90013	chr8	127246065	127262024	Arv1	5.76304	2.97874	-0.952128
chr16	18348274	18479166	Arvcf	5.79635	2.48113	-1.22415	chr16	18348274	18479166	Arvcf	7.97239	4.58386	-0.79845
chrX	132528358	132529898	Arxes2	7.58291	3.4362	-1.14194	chrX	132528358	132529898	Arxes2	1.7075	3.46837	1.02238
chr19	46781947	46815585	As3mt	1.30619	5.49794	2.07353	chr19	46781947	46815585	As3mt	5.41539	4.51567	-0.262126
chr8	42425999	42460051	Asah1	32.1449	30.2733	-0.0865447	chr8	42425999	42460051	Asah1	15.191	13.9594	-0.12198
chr15	63918401	64214481	Asap1	7.02062	6.47081	-0.11765	chr15	63918401	64214481	Asap1	7.02666	5.80181	-0.276337
chr12	21117616	21292145	Asap2	4.70548	2.23387	-1.0748	chr12	21117616	21292145	Asap2	3.19853	2.634	-0.280156
chr4	135762279	135802488	Asap3	14.4683	4.00348	-1.85357	chr4	135762279	135802488	Asap3	20.287	7.7773	-1.38322
chr1	93437141	93456167	Asb1	4.84782	2.44207	-0.989229	chr1	93437141	93456167	Asb1	2.94545	2.56154	-0.201477
chr13	3633277	3651025	Asb13	3.28755	3.07602	-0.0959472	chr13	3633277	3651025	Asb13	6.24638	2.82844	-1.14301
chr12	104559351	104594211	Asb2	3.94911	5.75996	0.54453	chr12	104559351	104594211	Asb2	1.01819	0.794423	-0.358032
chr11	30854397	31002704	Asb3	7.32644	6.26345	-0.226154	chr11	30854397	31002704	Asb3	2.90877	3.83658	0.399412
chr6	5333385	5383021	Asb4	5.62717	2.68928	-1.06519	chr6	5333385	5383021	Asb4	0.123044	2.5538	4.3754
chr8	55635683	55673195	Asb5	76.4105	234.538	1.61798	chr8	55635683	55673195	Asb5	79.4642	181.309	1.19008
chr2	30678617	30683820	Asb6	47.9099	24.4211	-0.972195	chr2	30678617	30683820	Asb6	53.2204	23.9587	-1.15143
chr7	73789456	73834447	Asb7	3.93022	3.32531	-0.24112	chr7	73789456	73834447	Asb7	1.98718	4.68155	1.23627
chr15	97965070	97996009	Asb8	19.7852	18.9232	-0.0642705	chr15	97965070	97996009	Asb8	10.4015	13.2741	0.35182
chr10	59450156	59562738	Ascc1	3.49327	16.3377	2.22556	chr10	59450156	59562738	Ascc1	3.00516	5.78903	0.945878
chr11	4537795	4583388	Ascc2	29.4144	10.7545	-1.45158	chr11	4537795	4583388	Ascc2	49.3425	27.1682	-0.86091
chr10	50312474	50571008	Ascc3	3.97384	3.13127	-0.343783	chr10	50312474	50571008	Ascc3	2.60651	1.59255	-0.710784
chr10	53256120	53349763	Asf1a	8.43241	30.9273	1.87486	chr10	53256120	53349763	Asf1a	5.16132	16.9644	1.7167
chr8	86479592	86494094	Asf1b	16.5947	61.4701	1.88916	chr8	86479592	86494094	Asf1b	4.58782	15.0433	1.71324
chr3	88769733	88883297	Ash1l	7.48582	6.41625	-0.222431	chr3	88769733	88883297	Ash1l	24.2655	10.7437	-1.17541
chr8	26926472	26958166	Ash2l	12.982	38.4877	1.56789	chr8	26926472	26958166	Ash2l	15.9273	17.2657	0.116404
chr5	23919268	23923652	Asic3	3.96265	1.22465	-1.6941	chr5	23919268	23923652	Asic3	3.03599	0.721941	-2.07221
chr5	130487127	130500251	Asl	11.0305	12.9302	0.229236	chr5	130487127	130500251	Asl	14.1172	6.31521	-1.16055
chr8	87541827	87549186	Asna1	49.5796	114.762	1.21082	chr8	87541827	87549186	Asna1	70.5804	64.5836	-0.128099
chr6	7625164	7643209	Asns	42.6441	99.0274	1.21548	chr6	7625164	7643209	Asns	27.8503	34.7306	0.318514
chr1	53401460	53409596	Asnsd1	14.322	37.3069	1.38121	chr1	53401460	53409596	Asnsd1	21.8967	25.1961	0.202486
chr12	113344893	113365784	Aspg	3.21627	0.670838	-2.26135	chr12	113344893	113365784	Aspg	0.728414	1.15226	0.661639
chr4	9196439	9596491	Asph	33.2495	36.1546	0.120848	chr4	9196439	9596491	Asph	16.1737	28.3407	0.809226
chr1	141351349	141390665	Aspm	9.58587	6.7753	-0.500626	chr1	141351349	141390665	Aspm	3.87989	2.57956	-0.588893
chr11	120534286	120570760	Aspscr1	36.1347	30.2032	-0.258682	chr11	120534286	120570760	Aspscr1	34.3242	20.2192	-0.763502
chr19	9186208	9210056	Asrgl1	2.07024	10.117	2.28891	chr19	9186208	9210056	Asrgl1	2.82752	3.72523	0.397794
chr2	31325789	31376190	Ass1	75.6496	406.076	2.42434	chr2	31325789	31376190	Ass1	138.798	95.7574	-0.535531
chr9	105297691	105308086	Aste1	11.3808	7.13554	-0.673505	chr9	105297691	105308086	Aste1	16.9407	13.653	-0.311275
chr2	153171565	153229743	Asxl1	31.8009	12.6765	-1.32691	chr2	153171565	153229743	Asxl1	25.1048	13.2306	-0.924079
chr12	3426856	3506849	Asxl2	14.0929	4.97424	-1.50242	chr12	3426856	3506849	Asxl2	13.2342	8.96431	-0.562011
chr19	32747052	32786788	Atad1	26.0623	40.8335	0.64779	chr19	32747052	32786788	Atad1	21.1773	27.7887	0.391981
chr15	57925601	57966637	Atad2	31.0156	24.2604	-0.354389	chr15	57925601	57966637	Atad2	18.3541	16.8897	-0.119957
chr12	4924158	5054200	Atad2b	6.4147	3.47388	-0.884832	chr12	4924158	5054200	Atad2b	5.78766	4.07035	-0.507828
chr4	155114748	155135207	Atad3a	61.4695	47.7621	-0.364004	chr4	155114748	155135207	Atad3a	102.556	47.959	-1.09654
chr4	155135300	155137669	Atad3aos	5.67878	0.308497	-4.20225	chr4	155135300	155137669	Atad3aos	0.517091	1.65994	1.68264
chr11	79902901	79949293	Atad5	12.0613	3.41216	-1.82163	chr11	79902901	79949293	Atad5	5.67605	3.62858	-0.645481
chr17	36034540	36047020	Atat1	12.7929	7.13851	-0.841651	chr17	36034540	36047020	Atat1	14.8925	10.3454	-0.525593
chr7	137535007	137663883	Ate1	9.77474	8.65179	-0.17606	chr7	137535007	137663883	Ate1	7.51784	7.28946	-0.0445076
chr15	100058289	100091679	Atf1	32.8178	43.7634	0.415248	chr15	100058289	100091679	Atf1	23.0339	24.0423	0.0618191
chr2	73654565	73730696	Atf2	17.8387	16.0012	-0.156836	chr2	73654565	73730696	Atf2	14.1909	14.0319	-0.0162556
chr1	192994175	193007212	Atf3	17.6869	3.20469	-2.46443	chr1	192994175	193007212	Atf3	20.5566	21.6769	0.0765606
chr15	80085613	80087975	Atf4	323.79	476.849	0.558476	chr15	80085613	80087975	Atf4	228.521	415.72	0.863284
chr7	52067625	52104449	Atf5	61.6333	94.0609	0.609883	chr7	52067625	52104449	Atf5	39.1081	63.2998	0.694734
chr1	172634587	172797902	Atf6	6.96287	9.83819	0.498712	chr1	172634587	172797902	Atf6	4.32607	6.19755	0.518642
chr17	34784090	34792019	Atf6b	20.606	24.8096	0.267837	chr17	34784090	34792019	Atf6b	24.1329	16.9172	-0.512506
chr15	102356376	102455895	Atf7	7.53213	6.8589	-0.135082	chr15	102356376	102455895	Atf7	7.58132	6.09673	-0.314412
chr6	136467371	136555900	Atf7ip	6.00608	9.01872	0.586499	chr6	136467371	136555900	Atf7ip	9.01206	3.74125	-1.26834
chr13	91074953	91363592	Atg10	2.35724	7.98262	1.75976	chr13	91074953	91363592	Atg10	1.23016	2.98072	1.27681
chr15	101114731	101121365	Atg101	31.3961	40.7032	0.37456	chr15	101114731	101121365	Atg101	14.2954	15.4768	0.114558
chr18	46892070	46901233	Atg12	11.2781	11.2948	0.00214511	chr18	46892070	46901233	Atg12	4.43091	5.74778	0.375399
chr2	91514768	91550749	Atg13	10.4244	9.71669	-0.10143	chr2	91514768	91550749	Atg13	6.96354	6.89243	-0.0148083
chr14	48160567	48188109	Atg14	8.11884	3.24886	-1.32134	chr14	48160567	48188109	Atg14	7.25179	3.07663	-1.23699
chr1	89652585	89689003	Atg16l1	45.4682	8.83189	-2.36406	chr1	89652585	89689003	Atg16l1	41.1552	19.6948	-1.06326
chr7	108438129	108450602	Atg16l2	18.9925	4.59549	-2.04714	chr7	108438129	108450602	Atg16l2	28.4104	9.67491	-1.5541
chr19	6241667	6262304	Atg2a	10.9293	8.28943	-0.39885	chr19	6241667	6262304	Atg2a	15.606	6.40724	-1.28432
chr12	106851748	106923451	Atg2b	9.48612	4.22226	-1.1678	chr12	106851748	106923451	Atg2b	9.53605	6.68624	-0.512197
chr16	45158941	45188651	Atg3	5.28627	26.2321	2.31101	chr16	45158941	45188651	Atg3	10.9563	7.76382	-0.496926
chrX	137491445	137598813	Atg4a	2.84712	6.22408	1.12836	chrX	137491445	137598813	Atg4a	4.90048	3.65863	-0.42162
chr1	95651481	95686179	Atg4b	14.406	12.4678	-0.208464	chr1	95651481	95686179	Atg4b	11.4117	5.96689	-0.935457
chr4	98860624	98926478	Atg4c	7.28345	3.43088	-1.08604	chr4	98860624	98926478	Atg4c	2.01741	2.56465	0.346257
chr9	21069728	21092413	Atg4d	13.6027	11.5311	-0.238363	chr9	21069728	21092413	Atg4d	14.481	9.92113	-0.545584
chr10	43988144	44084105	Atg5	8.9357	18.7021	1.06555	chr10	43988144	44084105	Atg5	4.54484	7.45772	0.714505
chr6	114593118	114810632	Atg7	11.4679	13.7857	0.265574	chr6	114593118	114810632	Atg7	7.52592	20.0151	1.41115
chr1	75177434	75188584	Atg9a	13.1949	8.36091	-0.658254	chr1	75177434	75188584	Atg9a	11.2097	7.19094	-0.64049
chr5	23870636	23897961	Atg9b	18.9878	1.61444	-3.55597	chr5	23870636	23897961	Atg9b	174.699	58.5981	-1.57594
chr1	71603729	71625977	Atic	49.3113	114.017	1.20926	chr1	71603729	71625977	Atic	28.4369	28.9396	0.0252775
chr12	70847834	71087989	Atl1	1.88865	0.534684	-1.8206	chr12	70847834	71087989	Atl1	2.9816	0.80069	-1.89677
chr17	80247729	80295463	Atl2	16.3415	16.9561	0.0532677	chr17	80247729	80295463	Atl2	14.5641	14.4614	-0.0102088
chr19	7568529	7613099	Atl3	8.44796	6.0731	-0.476169	chr19	7568529	7613099	Atl3	5.60767	8.21234	0.550392
chr9	53245226	53344776	Atm	6.13425	4.21614	-0.540964	chr9	53245226	53344776	Atm	3.19766	3.82702	0.259206
chr8	119467292	119484345	Atmin	1.6883	4.37055	1.37224	chr8	119467292	119484345	Atmin	1.94143	3.3199	0.774023
chr6	124692561	124706505	Atn1	35.3426	36.4628	0.0450165	chr6	124692561	124706505	Atn1	56.7612	35.0567	-0.695214
chr6	72156171	72185571	Atoh8	43.7437	110.331	1.33469	chr6	72156171	72185571	Atoh8	62.1862	45.1183	-0.462881
chr11	55260138	55274710	Atox1	31.3337	248.63	2.98822	chr11	55260138	55274710	Atox1	12.927	113.051	3.12852
chr7	65913571	66084796	Atp10a	5.01923	2.8682	-0.807322	chr7	65913571	66084796	Atp10a	4.32869	3.49924	-0.306887
chr5	72594567	72690010	Atp10d	4.9185	1.04102	-2.24022	chr5	72594567	72690010	Atp10d	4.47113	3.01916	-0.566493
chr8	12757015	12868728	Atp11a	15.5999	7.87188	-0.986761	chr8	12757015	12868728	Atp11a	12.3178	9.30475	-0.40471
chr3	35652984	35755198	Atp11b	9.06132	9.92648	0.131561	chr3	35652984	35755198	Atp11b	8.09906	8.52807	0.0744648
chrX	57476459	57657180	Atp11c	6.82676	5.34913	-0.351897	chrX	57476459	57657180	Atp11c	2.97751	4.83157	0.698388
chr8	72315061	72331647	Atp13a1	54.7354	21.2455	-1.36531	chr8	72315061	72331647	Atp13a1	82.274	30.6621	-1.42398
chr4	140542787	140563616	Atp13a2	8.25126	6.0015	-0.459292	chr4	140542787	140563616	Atp13a2	8.99843	6.28402	-0.517984
chr16	30312509	30388616	Atp13a3	36.2837	34.7866	-0.0607906	chr16	30312509	30388616	Atp13a3	23.4569	34.2302	0.545261
chr3	101380141	101408630	Atp1a1	113.79	295.468	1.37663	chr3	101380141	101408630	Atp1a1	47.8163	64.4318	0.43027
chr1	174201839	174228195	Atp1a2	5.14216	1.54181	-1.73774	chr1	174201839	174228195	Atp1a2	3.24229	5.13811	0.664226
chr1	166237802	166388486	Atp1b1	10.0708	7.00743	-0.52322	chr1	166237802	166388486	Atp1b1	2.21521	7.53243	1.76567
chr9	96233075	96264850	Atp1b3	60.0307	170.058	1.50225	chr9	96233075	96264850	Atp1b3	51.4364	113.069	1.13634
chr10	126305483	126338427	Atp23	8.75474	15.9438	0.864856	chr10	126305483	126338427	Atp23	8.73026	5.17602	-0.754181
chr7	133572280	133606587	Atp2a1	11.4896	7.27964	-0.65839	chr7	133572280	133606587	Atp2a1	3.62799	1.80435	-1.00769
chr5	122903521	122952234	Atp2a2	42.4911	96.1691	1.17841	chr5	122903521	122952234	Atp2a2	22.175	45.89	1.04925
chr11	72774670	72806545	Atp2a3	13.3721	11.5088	-0.216492	chr11	72774670	72806545	Atp2a3	24.506	19.1872	-0.352992
chr10	98377275	98488777	Atp2b1	36.878	51.3057	0.476361	chr10	98377275	98488777	Atp2b1	28.1563	73.9105	1.39232
chr1	135599250	135650324	Atp2b4	7.81652	6.08424	-0.361449	chr1	135599250	135650324	Atp2b4	5.65247	4.79388	-0.237687
chr9	105313691	105423587	Atp2c1	22.6569	20.7043	-0.130018	chr9	105313691	105423587	Atp2c1	14.3311	16.8096	0.23014
chr18	77996032	78021607	Atp5a1	159.335	556.707	1.80485	chr18	77996032	78021607	Atp5a1	77.0011	108.624	0.496388
chr10	127520362	127527444	Atp5b	314.814	1247.1	1.98601	chr10	127520362	127527444	Atp5b	134.151	254.345	0.922931
chr2	9977658	10002137	Atp5c1	48.6915	304.831	2.64627	chr2	9977658	10002137	Atp5c1	27.4353	71.9307	1.39057
chr10	79605019	79608573	Atp5d	178.194	653.964	1.87576	chr10	79605019	79608573	Atp5d	95.0279	188.601	0.988918
chr2	174286575	174289602	Atp5e	351.327	1161.14	1.72465	chr2	174286575	174289602	Atp5e	76.2751	687.136	3.17131
chr11	95934106	95937008	Atp5g1	50.4245	385.788	2.93561	chr11	95934106	95937008	Atp5g1	31.8009	107.844	1.76181
chr15	102493298	102501478	Atp5g2	33.1143	187.628	2.50235	chr15	102493298	102501478	Atp5g2	27.7196	37.6715	0.442568
chr2	73746503	73749383	Atp5g3	268.977	1637.65	2.60608	chr2	73746503	73749383	Atp5g3	112.591	374.818	1.73509
chr11	115277010	115281233	Atp5h	171.523	697.552	2.0239	chr11	115277010	115281233	Atp5h	57.9868	226.239	1.96405
chr16	84828115	84864023	Atp5j	81.668	699.76	3.09902	chr16	84828115	84864023	Atp5j	57.6439	230.006	1.99643
chr5	145944574	145952461	Atp5j2	225.064	900.571	2.0005	chr5	145944574	145952461	Atp5j2	68.9068	216.61	1.65238
chr5	108862264	108863418	Atp5k	172.538	1134.38	2.71692	chr5	108862264	108863418	Atp5k	89.411	536.21	2.58427
chr9	44721330	44728825	Atp5l	6.54433	84.7571	3.69502	chr9	44721330	44728825	Atp5l	6.08746	32.9595	2.43678
chr19	47142237	47165137	Atp5md	178.586	1530.97	3.09976	chr19	47142237	47165137	Atp5md	80.1038	822.189	3.35953
chr12	113199584	113205220	Atp5mpl	123.573	752.848	2.607	chr12	113199584	113205220	Atp5mpl	32.2524	250.616	2.958
chr16	91925467	91931875	Atp5o	96.7203	691.02	2.83684	chr16	91925467	91931875	Atp5o	49.4102	128.707	1.38121
chr3	105745595	105772678	Atp5pb	41.3715	275.16	2.73356	chr3	105745595	105772678	Atp5pb	19.0245	54.8347	1.52723
chrX	71542435	71550060	Atp6ap1	49.816	79.739	0.678675	chrX	71542435	71550060	Atp6ap1	57.2842	50.8452	-0.172025
chrX	12164884	12194177	Atp6ap2	11.335	37.5071	1.72638	chrX	12164884	12194177	Atp6ap2	7.77851	19.6395	1.33619
chr11	100870754	100925031	Atp6v0a1	19.2745	8.35423	-1.20611	chr11	100870754	100925031	Atp6v0a1	34.1577	16.574	-1.04329
chr5	125079632	125204825	Atp6v0a2	21.7314	17.4579	-0.315904	chr5	125079632	125204825	Atp6v0a2	20.8035	14.8241	-0.488883
chr4	117556934	117559934	Atp6v0b	126.213	86.0159	-0.55319	chr4	117556934	117559934	Atp6v0b	151.804	103.424	-0.553645
chr17	24300831	24306623	Atp6v0c	6.50205	50.716	2.96347	chr17	24300831	24306623	Atp6v0c	5.02258	8.31948	0.728065
chr8	108048360	108089964	Atp6v0d1	12.6015	26.9071	1.09439	chr8	108048360	108089964	Atp6v0d1	14.2513	22.3475	0.649023
chr17	26813340	26836591	Atp6v0e	21.7585	174.851	3.00647	chr17	26813340	26836591	Atp6v0e	21.1868	44.1218	1.05833
chr6	48487567	48491799	Atp6v0e2	0.779842	2.12008	1.44287	chr6	48487567	48491799	Atp6v0e2	1.63141	3.6663	1.1682
chr16	44085516	44139372	Atp6v1a	16.4904	30.4461	0.884627	chr16	44085516	44139372	Atp6v1a	11.8268	21.6209	0.870369
chr8	71561606	71637616	Atp6v1b2	19.7855	29.2717	0.565065	chr8	71561606	71637616	Atp6v1b2	16.1637	19.4166	0.264534
chr15	38591658	38622199	Atp6v1c1	19.9724	27.1175	0.44122	chr15	38591658	38622199	Atp6v1c1	14.4508	16.4115	0.183559
chr12	79943968	79962625	Atp6v1d	28.0269	43.3167	0.628112	chr12	79943968	79962625	Atp6v1d	27.8142	34.2213	0.299072
chr6	120745261	120772716	Atp6v1e1	18.7353	66.1629	1.82026	chr6	120745261	120772716	Atp6v1e1	10.0415	18.7897	0.903963
chr6	29417782	29420509	Atp6v1f	15.2368	141.072	3.2108	chr6	29417782	29420509	Atp6v1f	20.2544	83.2121	2.03856
chr4	63205798	63211735	Atp6v1g1	51.9732	206.985	1.99368	chr4	63205798	63211735	Atp6v1g1	37.0313	218.023	2.55766
chr17	35357119	35375712	Atp6v1g2	7.08607	1.30379	-2.44227	chr17	35357119	35375712	Atp6v1g2	6.72441	2.28244	-1.55883
chr1	5073166	5152630	Atp6v1h	10.8565	30.3008	1.4808	chr1	5073166	5152630	Atp6v1h	11.1505	22.5492	1.01597
chrX	103222562	103323499	Atp7a	3.45529	2.7379	-0.335739	chrX	103222562	103323499	Atp7a	2.1607	2.42924	0.169005
chr5	68009377	68238670	Atp8a1	2.09589	0.549204	-1.93215	chr5	68009377	68238670	Atp8a1	2.76217	1.45939	-0.920435
chr18	64688632	64820654	Atp8b1	2.87399	0.380547	-2.91691	chr18	64688632	64820654	Atp8b1	0.441713	1.19249	1.43279
chr3	89743409	89767260	Atp8b2	17.4761	11.721	-0.57628	chr3	89743409	89767260	Atp8b2	17.4415	10.7835	-0.693694
chr18	80930879	81130797	Atp9b	28.5339	7.80216	-1.87073	chr18	80930879	81130797	Atp9b	31.4783	11.0419	-1.51137
chr4	115457432	115484528	Atpaf1	3.08464	6.56543	1.08979	chr4	115457432	115484528	Atpaf1	3.06289	2.57914	-0.248004
chr11	60214125	60230536	Atpaf2	31.0523	34.0229	0.131803	chr11	60214125	60230536	Atpaf2	35.4955	28.8512	-0.299006
chr4	132086469	132091329	Atpif1	16.7313	154.33	3.2054	chr4	132086469	132091329	Atpif1	13.4517	63.8398	2.24667
chr15	31531870	31547290	Atpsckmt	43.9026	29.8866	-0.554805	chr15	31531870	31547290	Atpsckmt	27.5598	18.9463	-0.54065
chr9	95755836	95852063	Atr	6.32153	3.07989	-1.0374	chr9	95755836	95852063	Atr	24.5605	9.09788	-1.43274
chr5	31338408	31357006	Atraid	32.1996	35.86	0.155332	chr5	31338408	31357006	Atraid	20.9971	19.8764	-0.0791361
chr9	108960445	108976638	Atrip	9.20814	3.72441	-1.3059	chr9	108960445	108976638	Atrip	6.51744	6.48749	-0.0066453
chr9	108960445	108976638	Atrip-trex1	1.30145	1.42521	0.131055	chr9	108960445	108976638	Atrip-trex1	3.69975	1.70827	-1.11489
chr2	130732230	130856062	Atrn	6.94175	6.61013	-0.0706202	chr2	130732230	130856062	Atrn	4.95139	8.17388	0.723186
chr19	57685523	58207830	Atrnl1	1.79931	3.10554	0.7874	chr19	57685523	58207830	Atrnl1	2.72779	1.69168	-0.689274
chrX	102992955	103124711	Atrx	25.0001	11.7244	-1.09242	chrX	102992955	103124711	Atrx	26.9557	19.3348	-0.479385
chr13	45645124	46060360	Atxn1	6.11004	1.58223	-1.94922	chr13	45645124	46060360	Atxn1	6.13219	2.72071	-1.17242
chr15	85166684	85294267	Atxn10	16.999	64.0766	1.91435	chr15	85166684	85294267	Atxn10	12.9298	30.5698	1.24141
chr8	112250350	112261680	Atxn1l	10.1871	6.80316	-0.582471	chr8	112250350	112261680	Atxn1l	4.89455	6.59418	0.430019
chr5	122161617	122264959	Atxn2	14.7765	19.5156	0.401329	chr5	122161617	122264959	Atxn2	12.9506	11.8949	-0.122674
chr7	133635221	133646951	Atxn2l	82.1681	42.6089	-0.947424	chr7	133635221	133646951	Atxn2l	63.414	35.1511	-0.851232
chr12	103157110	103196453	Atxn3	7.1397	4.13525	-0.78789	chr12	103157110	103196453	Atxn3	4.34711	4.83028	0.152051
chr14	14845004	14939815	Atxn7	8.01593	1.77884	-2.17193	chr14	14845004	14939815	Atxn7	7.90076	5.69159	-0.473159
chr12	33796575	34079625	Atxn7l1	6.4047	15.5587	1.28052	chr12	33796575	34079625	Atxn7l1	15.7964	17.5738	0.153828
chr3	108005145	108013445	Atxn7l2	14.6422	5.8647	-1.32001	chr3	108005145	108013445	Atxn7l2	21.3935	5.84751	-1.87128
chr11	102146264	102157943	Atxn7l3	33.4835	25.8891	-0.371107	chr11	102146264	102157943	Atxn7l3	24.5833	16.2615	-0.59622
chr10	112362483	112366082	Atxn7l3b	42.7448	71.3563	0.739293	chr10	112362483	112366082	Atxn7l3b	60.5774	106.118	0.808819
chr13	52930478	53025046	Auh	6.4419	10.757	0.739721	chr13	52930478	53025046	Auh	4.84828	6.46844	0.415943
chr4	134066913	134079837	Aunip	18.9681	36.9051	0.960245	chr4	134066913	134079837	Aunip	4.17149	9.70221	1.21775
chr6	82984198	83007676	Aup1	55.6758	79.0297	0.505344	chr6	82984198	83007676	Aup1	121.225	80.6392	-0.588138
chr2	172181689	172196070	Aurka	64.2551	113.716	0.823559	chr2	172181689	172196070	Aurka	15.6514	39.9858	1.35319
chr4	155205377	155207207	Aurkaip1	41.7047	131.125	1.65266	chr4	155205377	155207207	Aurkaip1	35.5386	82.9282	1.22248
chr11	68859138	68865166	Aurkb	45.3338	73.57	0.698531	chr11	68859138	68865166	Aurkb	17.7284	14.3604	-0.303967
chr5	131913202	133019090	Auts2	21.4377	14.6696	-0.547323	chr5	131913202	133019090	Auts2	13.7706	19.6648	0.514024
chr2	112333120	112471410	Aven	17.9435	46.3596	1.36941	chr2	112333120	112471410	Aven	7.61074	11.4778	0.592735
chr10	126437764	126458050	Avil	6.89362	0.634216	-3.44222	chr10	126437764	126458050	Avil	3.82753	2.85636	-0.422233
chr6	56664898	56711905	Avl9	3.5315	2.08636	-0.759294	chr6	56664898	56711905	Avl9	3.90215	2.0082	-0.958364
chr19	42197764	42203483	Avpi1	11.364	30.4383	1.42142	chr19	42197764	42203483	Avpi1	5.72414	16.3074	1.5104
chr17	26275630	26332756	Axin1	15.5945	16.4251	0.0748669	chr17	26275630	26332756	Axin1	16.5096	9.24935	-0.835878
chr11	108781662	108812095	Axin2	2.66769	0.369731	-2.85104	chr11	108781662	108812095	Axin2	2.52693	1.83534	-0.461337
chr7	26541518	26573752	Axl	83.745	125.313	0.581464	chr7	26541518	26573752	Axl	161.155	89.3555	-0.850823
chr9	117949639	118059314	Azi2	13.617	12.9639	-0.0709104	chr9	117949639	118059314	Azi2	14.8474	15.8933	0.0982087
chr15	38417184	38449021	Azin1	47.0939	46.3855	-0.021866	chr15	38417184	38449021	Azin1	29.219	39.2897	0.427242
chr4	128607476	128639699	Azin2	3.60681	4.33095	0.263962	chr4	128607476	128639699	Azin2	7.34207	9.04045	0.300207
chr11	95584899	95588087	B130006D01Rik	5.15089	0.0982132	-5.71276	chr11	95584899	95588087	B130006D01Rik	2.21346	2.78136	0.329488
chr16	87496317	87504283	B130034C11Rik	2.15581	0.317263	-2.76448	chr16	87496317	87504283	B130034C11Rik	0.503887	1.23083	1.28846
chr2	101400935	101472685	B230118H07Rik	2.66422	7.4054	1.47486	chr2	101400935	101472685	B230118H07Rik	0.664446	1.48	1.15537
chr10	12636443	12642925	B230208H11Rik	2.05145	2.99657	0.546673	chr10	12636443	12642925	B230208H11Rik	1.0326	0.965936	-0.0962873
chr1	99717670	99992223	B230216N24Rik	6.09954	0.765917	-2.99344	chr1	99717670	99992223	B230216N24Rik	2.91318	2.17478	-0.421725
chr11	97702419	97705183	B230217C12Rik	5.08921	4.00258	-0.34651	chr11	97702419	97705183	B230217C12Rik	0.853848	2.53308	1.56884
chr13	55794484	55804861	B230219D22Rik	24.2216	28.389	0.229042	chr13	55794484	55804861	B230219D22Rik	8.95035	21.0329	1.23263
chr16	98218479	98237921	B230307C23Rik	6.27575	3.19329	-0.974745	chr16	98218479	98237921	B230307C23Rik	4.03718	4.08277	0.0162031
chr17	45570779	45579493	B230354K17Rik	18.8502	8.03074	-1.23098	chr17	45570779	45579493	B230354K17Rik	10.7783	12.976	0.26772
chr2	121945843	122011925	B2m	57.5156	390.573	2.76357	chr2	121945843	122011925	B2m	34.0263	274.271	3.01088
chr4	141102076	141104228	B330016D10Rik	3.65621	1.06807	-1.77534	chr4	141102076	141104228	B330016D10Rik	3.17751	2.57818	-0.301545
chr3	69377840	69402882	B3galnt1	3.0803	8.17735	1.40856	chr3	69377840	69402882	B3galnt1	1.11575	3.53583	1.66404
chr13	14046940	14131905	B3galnt2	18.7015	17.8585	-0.0665378	chr13	14046940	14131905	B3galnt2	11.3276	21.493	0.924025
chr2	67942728	67960939	B3galt1	1.83141	1.5964	-0.198129	chr2	67942728	67960939	B3galt1	0.956726	1.15653	0.273623
chr17	34086856	34088433	B3galt4	1.09709	1.82178	0.731665	chr17	34086856	34088433	B3galt4	0.3561	3.82557	3.42532
chr4	155363574	155366787	B3galt6	1.69714	6.90329	2.02418	chr4	155363574	155366787	B3galt6	2.67598	5.52201	1.04513
chr19	8994882	9001726	B3gat3	26.5562	33.4938	0.334842	chr19	8994882	9001726	B3gat3	18.1469	26.2899	0.534785
chr5	150480804	150565174	B3glct	7.63003	6.22752	-0.293032	chr5	150480804	150565174	B3glct	3.66185	3.89391	0.0886483
chr11	22734738	22760336	B3gnt2	2.04648	4.02193	0.974743	chr11	22734738	22760336	B3gnt2	1.51592	4.21349	1.47482
chr16	19760326	19772846	B3gnt5	5.82695	5.39508	-0.111097	chr16	19760326	19772846	B3gnt5	0.876986	4.37856	2.31983
chr7	26412642	26414509	B3gnt8	9.68656	25.7775	1.41206	chr7	26412642	26414509	B3gnt8	11.7015	10.9228	-0.0993511
chr8	107749087	107779053	B3gnt9	2.23641	3.39475	0.602117	chr8	107749087	107779053	B3gnt9	4.63625	1.73906	-1.41465
chr11	121313304	121534465	B3gntl1	11.9669	2.59451	-2.20551	chr11	121313304	121534465	B3gntl1	14.0207	5.50324	-1.3492
chr8	42076265	42219080	B430010I23Rik	6.82136	0.0207315	-8.36209	chr8	42076265	42219080	B430010I23Rik	0.287602	1.66993	2.53764
chr10	126602211	126617638	B4galnt1	13.0816	2.8349	-2.20617	chr10	126602211	126617638	B4galnt1	3.47422	1.79088	-0.956023
chr4	40751614	40801570	B4galt1	19.7895	12.9418	-0.612697	chr4	40751614	40801570	B4galt1	4.74366	8.21741	0.792684
chr4	117545604	117556081	B4galt2	16.7993	11.978	-0.488014	chr4	117545604	117556081	B4galt2	14.704	9.81551	-0.583069
chr1	173200458	173207026	B4galt3	28.4261	14.1243	-1.00904	chr1	173200458	173207026	B4galt3	46.7147	21.8145	-1.09859
chr16	38742371	38769167	B4galt4	2.16488	2.06174	-0.0704285	chr16	38742371	38769167	B4galt4	1.40814	0.911681	-0.627186
chr2	167123944	167174678	B4galt5	22.4012	15.7644	-0.506912	chr2	167123944	167174678	B4galt5	10.2464	10.5588	0.0433375
chr18	20843099	20904905	B4galt6	10.3882	9.93794	-0.0639314	chr18	20843099	20904905	B4galt6	4.72165	15.1817	1.68497
chr13	55701256	55711804	B4galt7	41.5055	13.7812	-1.59061	chr13	55701256	55711804	B4galt7	15.2426	12.3909	-0.298823
chr19	5038825	5041134	B4gat1	10.1506	26.5966	1.38968	chr19	5038825	5041134	B4gat1	2.90457	13.805	2.2488
chr11	61318645	61326433	B9d1	4.30042	39.5663	3.20172	chr11	61318645	61326433	B9d1	12.7026	32.1897	1.34147
chr7	26465798	26471581	B9d2	14.1452	26.7989	0.921862	chr7	26465798	26471581	B9d2	12.8569	20.3766	0.664363
chr17	25321505	25324607	BC003965	33.526	20.0841	-0.739228	chr17	25321505	25324607	BC003965	21.9167	26.0096	0.247016
chr17	29405732	29439832	BC004004	6.59817	16.5993	1.33098	chr17	29405732	29439832	BC004004	3.53306	5.90355	0.740663
chr13	24893525	24904768	BC005537	45.3274	37.0708	-0.290101	chr13	24893525	24904768	BC005537	54.265	21.9457	-1.30609
chr2	30828352	30837461	BC005624	42.1021	43.2596	0.039127	chr2	30828352	30837461	BC005624	50.5201	18.9749	-1.41276
chr7	135409196	135441645	BC017158	22.9647	16.5873	-0.469334	chr7	135409196	135441645	BC017158	35.5478	18.9091	-0.910681
chr7	27972024	27990405	BC024978	13.4847	3.18189	-2.08337	chr7	27972024	27990405	BC024978	3.78373	2.13566	-0.825128
chr10	81069052	81072581	BC025920	2.85109	1.5641	-0.866181	chr10	81069052	81072581	BC025920	4.21396	1.61211	-1.38622
chr2	155601077	155644939	BC029722	6.79122	17.8591	1.39492	chr2	155601077	155644939	BC029722	8.05274	15.0446	0.901694
chr18	75165492	75169589	BC031181	23.2473	96.3735	2.05157	chr18	75165492	75169589	BC031181	21.0417	70.2326	1.73889
chr1	157059600	157091662	BC034090	19.3321	6.79731	-1.50796	chr1	157059600	157091662	BC034090	24.5251	9.36265	-1.38927
chr10	121176985	121189921	BC048403	3.83832	3.00224	-0.354436	chr10	121176985	121189921	BC048403	1.94522	4.51261	1.21402
chr17	34045126	34046123	BC051226	1.49663	2.2318	0.576486	chr17	34045126	34046123	BC051226	1.60849	3.38349	1.0728
chr2	115407451	115604504	BC052040	2.29155	7.0398	1.61921	chr2	115407451	115604504	BC052040	2.64808	2.27927	-0.216375
chr1	165859230	165924927	BC055324	9.542	9.60847	0.0100141	chr1	165859230	165924927	BC055324	8.32264	4.85562	-0.777385
chrX	133267489	133337900	BC065397	6.80457	0.181822	-5.22591	chrX	133267489	133337900	BC065397	6.90914	7.27773	0.074983
chr8	73920753	73928671	Babam1	28.6078	74.6866	1.38444	chr8	73920753	73928671	Babam1	31.3749	32.2249	0.0385647
chr5	32000422	32387112	Babam2	9.36994	23.8095	1.34543	chr5	32000422	32387112	Babam2	6.3093	4.24224	-0.572652
chr9	45646627	45670567	Bace1	8.98243	5.76483	-0.639829	chr9	45646627	45670567	Bace1	4.95027	9.42376	0.928796
chr16	87699198	87733591	Bach1	7.30726	5.27133	-0.471164	chr16	87699198	87733591	Bach1	5.96396	6.77109	0.183117
chr19	7012546	7026395	Bad	13.7847	42.392	1.62072	chr19	7012546	7026395	Bad	10.6114	30.7516	1.53505
chr4	40883430	40895327	Bag1	45.7241	144.85	1.66353	chr4	40883430	40895327	Bag1	19.9151	59.4616	1.5781
chr1	33802328	33814595	Bag2	11.6935	18.3849	0.652817	chr1	33802328	33814595	Bag2	4.70174	7.66267	0.704652
chr7	135667096	135690493	Bag3	56.5314	97.6512	0.788584	chr7	135667096	135690493	Bag3	34.0078	34.4107	0.0169899
chr8	26864951	26895681	Bag4	4.64233	8.13889	0.809982	chr8	26864951	26895681	Bag4	1.89733	5.63495	1.57043
chr12	112947700	112951467	Bag5	6.37703	24.3749	1.93444	chr12	112947700	112951467	Bag5	5.77256	9.01352	0.642878
chr17	35272157	35284266	Bag6	59.9644	89.7477	0.581769	chr17	35272157	35284266	Bag6	63.8461	46.115	-0.469364
chr11	120094260	120153611	Bahcc1	10.194	5.69143	-0.840861	chr11	120094260	120153611	Bahcc1	13.2397	7.94298	-0.737116
chr2	118727350	118750260	Bahd1	10.9902	8.43401	-0.381932	chr2	118727350	118750260	Bahd1	6.39552	5.43946	-0.233597
chr11	119804405	119868096	Baiap2	57.0133	39.6697	-0.523261	chr11	119804405	119868096	Baiap2	76.2125	48.4285	-0.654172
chr5	145005305	145121874	Baiap2l1	4.00242	8.79188	1.1353	chr5	145005305	145121874	Baiap2l1	4.86723	4.03185	-0.271657
chr17	27154979	27173323	Bak1	13.5857	36.5593	1.42815	chr17	27154979	27173323	Bak1	7.15107	9.17036	0.358818
chr19	5364632	5371511	Banf1	107.757	872.5	3.01738	chr19	5364632	5371511	Banf1	102.412	299.572	1.54851
chr8	124474391	124553160	Banp	9.99619	5.9549	-0.747301	chr8	124474391	124553160	Banp	10.0343	8.64124	-0.215632
chr14	32064674	32073115	Bap1	35.4116	29.5651	-0.260324	chr14	32064674	32073115	Bap1	29.7577	23.3325	-0.350919
chr1	71074108	71149546	Bard1	13.3425	6.93237	-0.944604	chr1	71074108	71149546	Bard1	5.35529	3.79543	-0.496702
chr9	31653628	31720870	Barx2	2.6739	0.262439	-3.34889	chr9	31653628	31720870	Barx2	0.341103	2.24241	2.71677
chr15	25293031	25343519	Basp1	23.2777	29.9622	0.364194	chr15	25293031	25343519	Basp1	8.33183	27.8668	1.74184
chr7	52717064	52722268	Bax	448.099	665.19	0.569949	chr7	52717064	52722268	Bax	748.172	474.536	-0.656853
chr12	55993975	56087323	Baz1a	21.5841	21.284	-0.0201976	chr12	55993975	56087323	Baz1a	26.0767	43.3613	0.733647
chr5	135663192	135721999	Baz1b	76.3812	36.1959	-1.07739	chr5	135663192	135721999	Baz1b	48.1549	31.6643	-0.604825
chr10	127529838	127566359	Baz2a	18.8964	9.83262	-0.942465	chr10	127529838	127566359	Baz2a	22.6648	18.8599	-0.265128
chr2	59737419	59963797	Baz2b	7.79863	4.0413	-0.948402	chr2	59737419	59963797	Baz2b	11.1631	12.3774	0.148973
chr7	16894931	16903683	Bbc3	33.8844	35.3246	0.0600481	chr7	16894931	16903683	Bbc3	59.8051	40.6132	-0.55832
chr19	53966720	54107768	Bbip1	6.29634	13.0745	1.05417	chr19	53966720	54107768	Bbip1	3.83064	5.85045	0.610962
chr12	85750017	85791974	Bbof1	0.954912	1.1258	0.237516	chr12	85750017	85791974	Bbof1	2.26518	0.740718	-1.61263
chr19	4886881	4906627	Bbs1	2.58275	0.975552	-1.40462	chr19	4886881	4906627	Bbs1	2.52944	1.45747	-0.795359
chr10	110735734	110738792	Bbs10	3.11738	1.5963	-0.965601	chr10	110735734	110738792	Bbs10	1.05437	0.979427	-0.106376
chr3	37211475	37220373	Bbs12	21.7072	6.73472	-1.68848	chr3	37211475	37220373	Bbs12	6.66255	3.49059	-0.932602
chr8	96591851	96622409	Bbs2	9.32332	2.42421	-1.94333	chr8	96591851	96622409	Bbs2	8.98274	5.19111	-0.791111
chr9	59169772	59201315	Bbs4	4.55651	2.54551	-0.839972	chr9	59169772	59201315	Bbs4	6.62399	5.80737	-0.189815
chr2	69485227	69505628	Bbs5	7.81097	5.18258	-0.591831	chr2	69485227	69505628	Bbs5	8.14526	3.55306	-1.1969
chr3	36472064	36512311	Bbs7	3.36105	5.84165	0.797463	chr3	36472064	36512311	Bbs7	5.1375	2.5211	-1.02701
chr9	22280158	22692724	Bbs9	1.14772	3.91367	1.76975	chr9	22280158	22692724	Bbs9	2.22954	3.00462	0.430436
chr16	50191956	50432579	Bbx	6.52303	11.085	0.765	chr16	50191956	50432579	Bbx	5.86261	20.9938	1.84035
chr7	20341486	20355881	Bcam	9.82889	21.241	1.11175	chr7	20341486	20355881	Bcam	10.4878	11.8128	0.17165
chr12	32280218	32319523	Bcap29	7.51168	20.98	1.48181	chr12	32280218	32319523	Bcap29	12.5621	23.2135	0.88589
chrX	70931516	70983873	Bcap31	38.131	162.869	2.09468	chrX	70931516	70983873	Bcap31	38.0739	62.3265	0.711045
chr8	114234374	114267749	Bcar1	107.269	117.255	0.128416	chr8	114234374	114267749	Bcar1	73.9016	58.7381	-0.331308
chr3	122122674	122233109	Bcar3	21.9148	23.6975	0.11283	chr3	122122674	122233109	Bcar3	29.6718	21.2723	-0.480115
chr3	102975577	102983077	Bcas2	62.9078	107.65	0.77503	chr3	102975577	102983077	Bcas2	39.5486	52.0355	0.395872
chr11	85166665	85645890	Bcas3	2.82932	5.2089	0.880525	chr11	85166665	85645890	Bcas3	2.74203	1.88412	-0.541357
chr6	144942354	145024677	Bcat1	7.53356	8.26823	0.134247	chr6	144942354	145024677	Bcat1	3.30097	4.24787	0.363849
chr7	52823164	52845080	Bcat2	29.7544	21.6723	-0.457253	chr7	52823164	52845080	Bcat2	36.985	29.6793	-0.317483
chr7	140878037	141073215	Bccip	48.0959	131.948	1.45599	chr7	140878037	141073215	Bccip	52.7661	90.6276	0.780341
chr15	99300514	99305161	Bcdin3d	15.4604	12.3312	-0.326267	chr15	99300514	99305161	Bcdin3d	14.7725	21.9613	0.57205
chr7	26414870	26443780	Bckdha	11.9939	28.9251	1.27002	chr7	26414870	26443780	Bckdha	11.5523	11.2155	-0.0426866
chr9	83818743	84017847	Bckdhb	17.6005	12.6711	-0.474069	chr9	83818743	84017847	Bckdhb	55.6719	26.8561	-1.0517
chr7	135047586	135053178	Bckdk	15.3411	28.1343	0.874928	chr7	135047586	135053178	Bckdk	11.2086	8.46234	-0.405473
chr3	145587225	145597328	Bcl10	13.8665	33.9504	1.29183	chr3	145587225	145597328	Bcl10	9.19603	15.9675	0.796059
chr1	108434752	108610867	Bcl2	7.10754	2.53337	-1.48829	chr1	108434752	108610867	Bcl2	4.97473	3.52101	-0.498629
chr2	152579908	152657464	Bcl2l1	31.6632	69.4048	1.13223	chr2	152579908	152657464	Bcl2l1	45.3891	108.084	1.25174
chr2	127951773	127988283	Bcl2l11	11.3665	3.43823	-1.72505	chr2	127951773	127988283	Bcl2l11	3.28991	2.14488	-0.617149
chr7	52242269	52252949	Bcl2l12	20.61	25.096	0.284115	chr7	52242269	52252949	Bcl2l12	23.3636	26.1086	0.160257
chr6	120786247	120842860	Bcl2l13	10.442	8.81648	-0.244128	chr6	120786247	120842860	Bcl2l13	2.89835	6.62924	1.19361
chr3	103636618	103658541	Bcl2l15	6.85785	0.623839	-3.45851	chr3	103636618	103658541	Bcl2l15	11.2723	34.8233	1.62727
chr14	55502261	55507071	Bcl2l2	16.65	7.89043	-1.07735	chr14	55502261	55507071	Bcl2l2	15.9753	13.6889	-0.222843
chr7	20393810	20408104	Bcl3	18.1427	26.4189	0.542181	chr7	20393810	20408104	Bcl3	20.4761	20.4165	-0.00420822
chr16	23965135	23988938	Bcl6	37.6136	20.2916	-0.890374	chr16	23965135	23988938	Bcl6	36.026	31.1649	-0.209119
chr5	123794456	123824092	Bcl7a	45.7089	21.2574	-1.10451	chr5	123794456	123824092	Bcl7a	63.1304	34.2484	-0.882299
chr5	135644241	135657722	Bcl7b	12.7714	23.679	0.890694	chr5	135644241	135657722	Bcl7b	20.9836	11.7926	-0.831379
chr7	134804967	134852280	Bcl7c	20.4782	143.407	2.80796	chr7	134804967	134852280	Bcl7c	26.5357	54.2589	1.03192
chr3	97007584	97031287	Bcl9	18.3853	8.10267	-1.18208	chr3	97007584	97031287	Bcl9	15.1674	10.9965	-0.463923
chr9	44290907	44334527	Bcl9l	22.8214	16.4466	-0.472603	chr9	44290907	44334527	Bcl9l	29.4834	27.4624	-0.102444
chr10	20032274	20062307	Bclaf1	36.4257	36.9082	0.0189868	chr10	20032274	20062307	Bclaf1	44.9289	45.183	0.00813614
chrX	155970599	156031013	Bclaf3	8.39204	2.65674	-1.65937	chrX	155970599	156031013	Bclaf3	8.10327	4.52459	-0.840719
chrX	11613863	11737481	Bcor	10.8229	10.9085	0.0113591	chrX	11613863	11737481	Bcor	7.0475	6.56309	-0.102737
chrX	45694534	45759905	Bcorl1	2.65244	3.1152	0.232006	chrX	45694534	45759905	Bcorl1	8.38997	3.35622	-1.32183
chr10	74523640	74647668	Bcr	3.41745	2.62856	-0.378648	chr10	74523640	74647668	Bcr	4.49719	2.77679	-0.695606
chr1	74634862	74639017	Bcs1l	11.6852	11.8561	0.020951	chr1	74634862	74639017	Bcs1l	5.99026	5.7456	-0.0601596
chr3	134944184	134967389	Bdh2	0.260194	1.13364	2.1233	chr3	134944184	134967389	Bdh2	0.900783	1.90048	1.07711
chr12	106842300	106843721	Bdkrb1	7.62948	9.42184	0.304424	chr12	106842300	106843721	Bdkrb1	9.27583	6.0577	-0.614706
chr12	106801381	106831281	Bdkrb2	2.27213	0.185534	-3.61429	chr12	106801381	106831281	Bdkrb2	2.05329	0.143329	-3.84054
chr2	109514856	109567200	Bdnf	10.7288	1.16997	-3.19695	chr2	109514856	109567200	Bdnf	4.47657	10.2571	1.19616
chr13	100787948	100874025	Bdp1	6.77303	3.63268	-0.898767	chr13	100787948	100874025	Bdp1	5.82295	5.96762	0.0354073
chr8	106694412	106742997	Bean1	4.20823	1.45006	-1.5371	chr8	106694412	106742997	Bean1	1.94577	1.8795	-0.0499951
chr11	101140516	101163600	Becn1	55.6168	54.3384	-0.03355	chr11	101140516	101163600	Becn1	81.5417	56.9082	-0.518902
chr12	110270391	110306452	Begain	1.79576	0.39983	-2.16713	chr12	110270391	110306452	Begain	4.90794	3.12284	-0.652261
chr10	43198945	43235223	Bend3	5.65953	6.23181	0.138969	chr10	43198945	43235223	Bend3	2.21495	2.87113	0.374342
chr1	33908896	33964612	Bend6	2.95611	1.25173	-1.23978	chr1	33908896	33964612	Bend6	2.02025	2.06362	0.0306433
chr6	4026898	4036930	Bet1	14.2401	33.7497	1.24492	chr6	4026898	4036930	Bet1	11.5489	17.1988	0.574561
chr7	148039282	148042282	Bet1l	40.3951	16.9893	-1.24955	chr7	148039282	148042282	Bet1l	25.7837	24.6557	-0.0645401
chrX	132748510	132750052	Bex1	7.00414	20.3123	1.53607	chrX	132748510	132750052	Bex1	0.46051	3.24476	2.81681
chrX	132601103	132602775	Bex2	1.08331	4.64443	2.10006	chrX	132601103	132602775	Bex2	0.432828	2.75966	2.67263
chrX	132804791	132806517	Bex3	51.0387	169.05	1.72779	chrX	132804791	132806517	Bex3	11.5931	41.3434	1.83439
chr16	13671950	13703705	Bfar	23.6899	24.5007	0.0485535	chr16	13671950	13703705	Bfar	21.0029	53.9484	1.36099
chr3	88181657	88182623	Bglap2	9.5072	2.81843	-1.75413	chr3	88181657	88182623	Bglap2	1.1377	14.4982	3.67168
chrX	70728939	70741275	Bgn	33.1266	140.297	2.08242	chrX	70728939	70741275	Bgn	39.9841	80.1337	1.00298
chrX	132420389	132425620	Bhlhb9	10.4272	16.2421	0.639386	chrX	132420389	132425620	Bhlhb9	3.26592	5.08589	0.63901
chr6	108527029	108616919	Bhlhe40	12.7866	10.0181	-0.352026	chr6	108527029	108616919	Bhlhe40	27.7943	19.8565	-0.485175
chr6	145806762	145813940	Bhlhe41	32.9237	15.4535	-1.0912	chr6	145806762	145813940	Bhlhe41	24.7538	17.0604	-0.536997
chr10	70385577	70622438	Bicc1	5.12136	6.34149	0.308294	chr10	70385577	70622438	Bicc1	2.59178	10.1708	1.97242
chr13	49436917	49482395	Bicd2	30.4426	20.5172	-0.569257	chr13	49436917	49482395	Bicd2	16.212	14.5388	-0.157156
chr5	116098183	116181630	Bicdl1	1.12134	2.37723	1.08406	chr5	116098183	116181630	Bicdl1	1.46012	3.2432	1.15133
chr7	16556610	16584844	Bicra	9.68957	2.86053	-1.76015	chr7	16556610	16584844	Bicra	11.6783	2.53589	-2.20326
chr17	46935064	46968362	Bicral	6.02141	3.24089	-0.89371	chr17	46935064	46968362	Bicral	5.668	3.88892	-0.54347
chr6	120843136	120866842	Bid	20.131	29.4652	0.549593	chr6	120843136	120866842	Bid	25.6128	20.529	-0.319202
chr18	32518710	32595394	Bin1	306.305	427.026	0.479355	chr18	32518710	32595394	Bin1	314.53	245.356	-0.358321
chr14	70499899	70537766	Bin3	10.107	17.0425	0.753785	chr14	70499899	70537766	Bin3	9.67132	5.21895	-0.889955
chr9	7818225	7837057	Birc2	24.3622	4.49648	-2.43778	chr9	7818225	7837057	Birc2	36.2303	21.7185	-0.738276
chr9	7848700	7873170	Birc3	3.97702	2.64196	-0.590081	chr9	7848700	7873170	Birc3	14.6559	10.4491	-0.488097
chr11	117710550	117717057	Birc5	94.7777	203.194	1.10024	chr11	117710550	117717057	Birc5	15.7348	30.8383	0.97076
chr17	74927634	75102696	Birc6	9.56433	8.02859	-0.252517	chr17	74927634	75102696	Birc6	11.0638	8.86806	-0.319161
chr1	44175801	44201616	Bivm	9.54726	5.9947	-0.671399	chr1	44175801	44201616	Bivm	4.30388	3.33881	-0.366303
chr2	157382097	157392097	Blcap	32.3405	24.2498	-0.41537	chr2	157382097	157392097	Blcap	28.9569	28.5811	-0.0188462
chr7	87599878	87680005	Blm	5.85494	5.22514	-0.164185	chr7	87599878	87680005	Blm	3.20756	2.64356	-0.278994
chr11	76759157	76800891	Blmh	15.7764	40.8749	1.37344	chr11	76759157	76800891	Blmh	11.3258	14.6202	0.368351
chr19	41003416	41068711	Blnk	0.661836	2.01205	1.60412	chr19	41003416	41068711	Blnk	1.43403	1.19748	-0.260072
chr10	128356969	128360580	Bloc1s1	36.1354	157.065	2.11987	chr10	128356969	128360580	Bloc1s1	14.1951	69.8519	2.29891
chr19	44213736	44220936	Bloc1s2	42.9474	79.6551	0.891196	chr19	44213736	44220936	Bloc1s2	66.0713	59.3958	-0.153662
chr7	20091152	20093719	Bloc1s3	1.0328	4.33702	2.07014	chr7	20091152	20093719	Bloc1s3	1.27338	2.00381	0.654086
chr5	37138612	37139918	Bloc1s4	13.9811	23.5108	0.749847	chr5	37138612	37139918	Bloc1s4	6.24353	20.4903	1.71451
chr13	38694570	38726961	Bloc1s5	2.715	8.84201	1.70342	chr13	38694570	38726961	Bloc1s5	2.52855	5.12544	1.01937
chr2	122564240	122575223	Bloc1s6	7.45343	11.4861	0.623917	chr2	122564240	122575223	Bloc1s6	7.09378	7.18969	0.0193742
chr2	126896392	126922820	Blvra	14.0081	31.2262	1.1565	chr2	126896392	126922820	Blvra	5.95901	10.5194	0.819904
chr7	28232996	28251000	Blvrb	10.7035	52.4151	2.2919	chr7	28232996	28251000	Blvrb	5.51025	18.5301	1.74968
chr1	166219929	166237618	Blzf1	10.7187	3.43943	-1.63988	chr1	166219929	166237618	Blzf1	7.39247	5.23577	-0.497654
chr2	18598644	18608256	Bmi1	30.8631	30.9642	0.00471697	chr2	18598644	18608256	Bmi1	24.1191	16.3474	-0.56112
chr14	70874361	70920479	Bmp1	70.1956	19.0966	-1.87806	chr14	70874361	70920479	Bmp1	128.541	52.8705	-1.28169
chr5	97426707	97540615	Bmp2k	3.27693	2.18049	-0.587694	chr5	97426707	97540615	Bmp2k	1.74157	1.61081	-0.112605
chr14	46999198	47010344	Bmp4	18.5283	16.2154	-0.192362	chr14	46999198	47010344	Bmp4	29.0451	57.7312	0.991058
chr13	38437584	38620693	Bmp6	1.36509	1.64131	0.265845	chr13	38437584	38620693	Bmp6	2.74677	4.3993	0.679537
chr9	23027519	23289659	Bmper	3.5519	3.66028	0.0433622	chr9	23027519	23289659	Bmper	2.561	6.6139	1.36879
chr14	35224253	35315732	Bmpr1a	9.68672	20.7972	1.10231	chr14	35224253	35315732	Bmpr1a	5.22656	12.2488	1.22871
chr1	59821122	59934925	Bmpr2	3.94398	7.71397	0.96782	chr1	59821122	59934925	Bmpr2	2.78856	5.71986	1.03646
chr6	118333398	118369435	Bms1	36.585	26.7807	-0.450061	chr6	118333398	118369435	Bms1	36.4479	21.3793	-0.769624
chr6	13575674	13627966	Bmt2	10.2374	6.00206	-0.770317	chr6	13575674	13627966	Bmt2	10.0432	9.94827	-0.0136985
chr2	25562398	25563239	Bmyc	4.40758	48.1504	3.44949	chr2	25562398	25563239	Bmyc	10.4379	17.8933	0.777587
chr4	83912710	84321307	Bnc2	4.51419	1.88417	-1.26054	chr4	83912710	84321307	Bnc2	2.96892	2.86338	-0.0522206
chr17	26918023	26929466	Bnip1	30.6128	33.6308	0.135649	chr17	26918023	26929466	Bnip1	51.9101	37.8417	-0.456037
chr9	69837272	69859466	Bnip2	29.6294	21.5369	-0.460215	chr9	69837272	69859466	Bnip2	16.4593	22.2743	0.436474
chr7	146082518	146101189	Bnip3	3.60287	23.6106	2.71222	chr7	146082518	146101189	Bnip3	2.22416	7.95457	1.83852
chr14	67604076	67627714	Bnip3l	15.0944	25.8055	0.773667	chr14	67604076	67627714	Bnip3l	7.22435	24.5356	1.76394
chr16	44485157	44558983	Boc	6.66537	5.01472	-0.410514	chr16	44485157	44558983	Boc	12.2919	8.63757	-0.509008
chr11	31565149	31571862	Bod1	28.6789	77.3188	1.43083	chr11	31565149	31571862	Bod1	15.4524	25.1176	0.70087
chr5	42178778	42235554	Bod1l	7.85387	9.42695	0.263387	chr5	42178778	42235554	Bod1l	18.7674	20.8956	0.154976
chr1	95582151	95592347	Bok	46.6123	77.1663	0.727262	chr1	95582151	95592347	Bok	29.9053	21.0863	-0.5041
chr3	96000510	96001509	Bola1	16.2788	59.9217	1.88008	chr3	96000510	96001509	Bola1	15.2319	26.0716	0.77538
chr7	133839513	133840207	Bola2	109.442	497.326	2.18403	chr7	133839513	133840207	Bola2	58.8248	436.45	2.89132
chr6	83299140	83310130	Bola3	5.22522	35.995	2.78423	chr6	83299140	83310130	Bola3	4.70642	17.4345	1.88924
chr15	76210942	76307679	Bop1	47.6266	69.446	0.544125	chr15	76210942	76307679	Bop1	59.1132	32.9039	-0.845223
chr14	99445595	99473759	Bora	38.9182	9.54036	-2.02833	chr14	99445595	99473759	Bora	33.5132	18.0351	-0.893918
chr6	134589529	134661202	Borcs5	2.24869	6.17376	1.45706	chr6	134589529	134661202	Borcs5	2.39237	2.80704	0.230613
chr11	68873276	68875078	Borcs6	8.79815	8.83726	0.00639847	chr11	68873276	68875078	Borcs6	4.56868	9.42389	1.04455
chr19	46764395	46777872	Borcs7	16.1464	8.64958	-0.900509	chr19	46764395	46777872	Borcs7	7.42842	15.3295	1.04519
chr8	72663397	72691387	Borcs8	15.348	14.0919	-0.123194	chr8	72663397	72691387	Borcs8	6.95617	8.27172	0.249895
chr6	34426355	34455136	Bpgm	4.68919	14.8823	1.66619	chr6	34426355	34455136	Bpgm	3.79081	11.1265	1.55341
chr13	34129509	34165943	Bphl	3.74114	9.18883	1.2964	chr13	34129509	34165943	Bphl	3.7925	3.36355	-0.173162
chr1	187156037	187181656	Bpnt1	15.486	26.6459	0.782945	chr1	187156037	187181656	Bpnt1	7.16087	12.0519	0.751048
chr11	106894394	106993461	Bptf	10.2154	9.23543	-0.145501	chr11	106894394	106993461	Bptf	12.177	25.2524	1.05226
chr6	39553236	39675462	Braf	5.49902	2.54502	-1.1115	chr6	39553236	39675462	Braf	3.13524	6.32086	1.01154
chr5	122110571	122137258	Brap	27.6712	14.9638	-0.886915	chr5	122110571	122137258	Brap	16.1562	13.4869	-0.260526
chr5	141180964	141195332	Brat1	8.2142	6.37201	-0.36637	chr5	141180964	141195332	Brat1	14.1345	10.2741	-0.460208
chr11	101350077	101413269	Brca1	11.3951	7.52567	-0.598528	chr11	101350077	101413269	Brca1	10.4017	3.66906	-1.50334
chr5	151325195	151372721	Brca2	2.93195	2.82361	-0.0543199	chr5	151325195	151372721	Brca2	6.23626	2.99952	-1.05595
chrX	72661966	72701040	Brcc3	8.60297	23.8837	1.47312	chrX	72661966	72701040	Brcc3	14.8384	7.25982	-1.03133
chr15	88517464	88564649	Brd1	28.7828	14.6157	-0.977686	chr15	88517464	88564649	Brd1	27.8954	17.1624	-0.700777
chr17	34248963	34259552	Brd2	127.526	84.9983	-0.585284	chr17	34248963	34259552	Brd2	135.308	139.423	0.0432219
chr2	27301100	27331193	Brd3	27.6762	44.9386	0.69931	chr2	27301100	27331193	Brd3	27.8983	68.8194	1.30264
chr2	27297955	27299741	Brd3os	3.69607	4.93488	0.417023	chr2	27297955	27299741	Brd3os	2.99753	2.85548	-0.0700427
chr17	32333216	32421078	Brd4	44.5224	72.3626	0.700714	chr17	32333216	32421078	Brd4	52.6636	158.271	1.58752
chr8	90856209	90886090	Brd7	19.2551	26.2089	0.444814	chr8	90856209	90886090	Brd7	13.775	20.5056	0.573958
chr18	34758268	34811390	Brd8	55.3531	13.9447	-1.98895	chr18	34758268	34811390	Brd8	40.4567	29.0514	-0.477773
chr18	34739499	34757122	Brd8dc	6.1669	0.0710531	-6.4395	chr18	34739499	34757122	Brd8dc	1.72896	2.40199	0.474324
chr13	74075258	74098337	Brd9	34.9968	23.8612	-0.552555	chr13	74075258	74098337	Brd9	51.9626	33.8388	-0.618795
chr12	114198072	114238832	Brf1	39.1986	13.931	-1.49251	chr12	114198072	114238832	Brf1	84.0036	30.164	-1.47762
chr8	28234303	28239104	Brf2	13.5258	8.72846	-0.631915	chr8	28234303	28239104	Brf2	8.56715	4.10714	-1.06068
chr5	145005305	145121874	Bri3	14.0728	73.4212	2.38328	chr5	145005305	145121874	Bri3	13.7424	22.2399	0.694519
chr5	125921937	125941255	Bri3bp	6.34695	18.5064	1.54389	chr5	125921937	125941255	Bri3bp	3.35257	9.12579	1.44468
chr11	85871637	86014695	Brip1	4.13903	3.49454	-0.244192	chr11	85871637	86014695	Brip1	1.36305	1.38003	0.0178616
chr11	86014861	86171098	Brip1os	12.8913	28.2484	1.13177	chr11	86014861	86171098	Brip1os	3.92001	13.0182	1.7316
chr15	10404533	10415692	Brix1	25.0075	53.4008	1.0945	chr15	10404533	10415692	Brix1	32.6287	34.9786	0.100329
chr6	113554765	113566945	Brk1	56.1866	160.348	1.51291	chr6	113554765	113566945	Brk1	42.0455	81.4895	0.954662
chr19	5041362	5049912	Brms1	40.024	51.7748	0.371383	chr19	5041362	5049912	Brms1	38.2891	28.8339	-0.409167
chr12	56937352	56970723	Brms1l	11.2429	12.1199	0.108362	chr12	56937352	56970723	Brms1l	8.2437	5.28179	-0.642266
chr1_random	249699	297849	Brox	31.4994	12.734	-1.30664	chr1_random	249699	297849	Brox	20.8975	16.5717	-0.334607
chr6	113257130	113274856	Brpf1	36.8153	11.2767	-1.70696	chr6	113257130	113274856	Brpf1	30.1059	20.8285	-0.531484
chr17	28938070	28975734	Brpf3	19.2539	4.88059	-1.98002	chr17	28938070	28975734	Brpf3	26.8903	10.7375	-1.32443
chr7	4642529	4676853	Brsk1	10.3443	3.34011	-1.63087	chr7	4642529	4676853	Brsk1	12.4378	5.80457	-1.09947
chr16	96213698	96304035	Brwd1	18.9187	14.5926	-0.374577	chr16	96213698	96304035	Brwd1	23.7335	15.4663	-0.617792
chrX	105931183	106029685	Brwd3	1.69314	0.902333	-0.907968	chrX	105931183	106029685	Brwd3	1.46	0.738093	-0.984094
chr19	8911418	8923173	Bscl2	28.1765	17.5189	-0.685577	chr19	8911418	8923173	Bscl2	30.7958	28.0349	-0.135508
chr4	129138922	129165676	Bsdc1	14.1816	11.9594	-0.245872	chr4	129138922	129165676	Bsdc1	16.6737	10.448	-0.674343
chr10	79167102	79174724	Bsg	136.001	516.871	1.92618	chr10	79167102	79174724	Bsg	82.2688	221.699	1.43019
chr8	74058154	74061371	Bst2	7.97165	40.1538	2.33259	chr8	74058154	74061371	Bst2	9.12647	12.8776	0.49673
chr19	37000568	37088547	Btaf1	17.9917	6.63228	-1.43976	chr19	37000568	37088547	Btaf1	18.1931	9.6191	-0.919417
chr7	88936959	88974317	Btbd1	17.0728	30.4458	0.834548	chr7	88936959	88974317	Btbd1	11.172	18.9276	0.760602
chr7	120459157	120512853	Btbd10	13.4509	9.34331	-0.525696	chr7	120459157	120512853	Btbd10	11.5372	6.7086	-0.782203
chr10	84849558	85123037	Btbd11	6.21999	4.83289	-0.364029	chr10	84849558	85123037	Btbd11	7.23493	6.49895	-0.154772
chr4	116791822	116798330	Btbd19	45.7619	9.0283	-2.34162	chr4	116791822	116798330	Btbd19	141.296	47.7023	-1.56659
chr10	80105361	80119816	Btbd2	8.35656	11.2755	0.432214	chr10	80105361	80119816	Btbd2	6.50124	5.0094	-0.376077
chr2	138082319	138113158	Btbd3	5.81789	3.12534	-0.896484	chr2	138082319	138113158	Btbd3	3.17908	0.655948	-2.27696
chr12	114198072	114238832	Btbd6	10.1318	10.1665	0.00492479	chr12	114198072	114238832	Btbd6	8.45308	4.68824	-0.850432
chr12	104022857	104116616	Btbd7	5.13687	4.24613	-0.274741	chr12	104022857	104116616	Btbd7	10.7384	3.8363	-1.48499
chr17	30352468	30713232	Btbd9	5.98055	4.52583	-0.402095	chr17	30352468	30713232	Btbd9	4.81941	10.8677	1.17312
chr14	32454242	32481383	Btd	22.1154	21.6252	-0.0323362	chr14	32454242	32481383	Btd	10.2564	18.4475	0.846895
chr13	99079851	99086961	Btf3	175.379	981.892	2.48508	chr13	99079851	99086961	Btf3	82.6397	209.054	1.33897
chr4	108486899	108506907	Btf3l4	3.534	9.88537	1.48399	chr4	108486899	108506907	Btf3l4	2.85584	4.34075	0.604032
chr10	96079634	96085445	Btg1	21.2148	42.1052	0.988927	chr10	96079634	96085445	Btg1	25.0651	29.4171	0.230976
chr1	135971441	135975732	Btg2	32.7401	24.9892	-0.389755	chr1	135971441	135975732	Btg2	25.885	47.3795	0.872146
chr17	50838005	50839209	Btg3	3.70665	19.0151	2.35896	chr17	50838005	50839209	Btg3	5.60476	20.8344	1.89424
chr19	45438223	45607833	Btrc	5.22353	4.51836	-0.209227	chr19	45438223	45607833	Btrc	3.44881	4.17833	0.276828
chr2	127625935	127657595	Bub1	13.33	15.8412	0.249009	chr2	127625935	127657595	Bub1	5.48128	3.35912	-0.706428
chr2	118423946	118467328	Bub1b	21.848	40.8388	0.90244	chr2	118423946	118467328	Bub1b	9.5595	6.10653	-0.646583
chr7	138703883	138715406	Bub3	52.4079	130.567	1.31693	chr7	138703883	138715406	Bub3	30.5927	40.8904	0.418576
chr9	46091094	46106866	Bud13	10.5096	11.9531	0.185679	chr9	46091094	46106866	Bud13	14.9032	10.9405	-0.445938
chr5	135528826	135541235	Bud23	36.8326	63.8754	0.794278	chr5	135528826	135541235	Bud23	60.627	43.2707	-0.486573
chr5	145901244	145927973	Bud31	45.8813	205.048	2.15998	chr5	145901244	145927973	Bud31	46.8501	49.6084	0.0825309
chr10	45055540	45092287	Bves	14.2294	15.1299	0.088533	chr10	45055540	45092287	Bves	5.81581	6.25205	0.104351
chr17	47641999	47748441	Bysl	11.6537	28.2978	1.27991	chr17	47641999	47748441	Bysl	12.7567	15.5676	0.28729
chr1	58449741	58464198	Bzw1	40.6782	147.728	1.86062	chr1	58449741	58464198	Bzw1	21.7533	79.2658	1.86547
chr12	36818421	36883412	Bzw2	25.0999	96.0482	1.93608	chr12	36818421	36883412	Bzw2	24.1233	38.7454	0.683596
chr15	76545705	76554275	C030006K11Rik	4.72342	8.03448	0.766374	chr15	76545705	76554275	C030006K11Rik	4.63295	7.66219	0.725826
chr7	143460006	143510194	C030029H02Rik	3.07796	0.0186908	-7.3635	chr7	143460006	143510194	C030029H02Rik	0.0864512	2.20342	4.67171
chr17	69765786	69768532	C030034I22Rik	2.49143	0.989282	-1.33252	chr17	69765786	69768532	C030034I22Rik	0.891433	2.29169	1.36222
chr11	88579956	88589886	C030037D09Rik	4.60546	5.80827	0.334764	chr11	88579956	88589886	C030037D09Rik	5.82923	1.00436	-2.53703
chr1	88256158	88265082	C130036L24Rik	1.81426	0.3591	-2.33693	chr1	88256158	88265082	C130036L24Rik	0.625752	2.10321	1.74893
chr11	103559037	103586887	C130046K22Rik	9.63406	1.61164	-2.57961	chr11	103559037	103586887	C130046K22Rik	1.17666	0.796442	-0.563053
chr5	52591222	52607672	C130083M11Rik	1.1869	0.534139	-1.15191	chr5	52591222	52607672	C130083M11Rik	1.82945	0.56049	-1.70665
chr11	17157549	17169179	C1d	4.77725	19.9979	2.0656	chr11	17157549	17169179	C1d	4.37076	6.76732	0.630701
chr6	7795223	7822042	C1galt1	5.09402	2.81764	-0.854317	chr6	7795223	7822042	C1galt1	1.66002	4.14361	1.31969
chrX	35983959	35988320	C1galt1c1	5.97048	17.1134	1.51921	chrX	35983959	35988320	C1galt1c1	3.64392	4.0329	0.146324
chr11	70783700	70796528	C1qbp	57.0814	443.586	2.95812	chr11	70783700	70796528	C1qbp	45.7511	103.533	1.17821
chr11	102800577	102808030	C1ql1	1.16379	2.41023	1.05034	chr11	102800577	102808030	C1ql1	1.7181	2.10903	0.295768
chr4	155336420	155340738	C1qtnf12	7.51512	23.5578	1.64833	chr4	155336420	155340738	C1qtnf12	13.2041	11.1396	-0.245288
chr15	10882086	10909917	C1qtnf3	49.6391	166.767	1.74829	chr15	10882086	10909917	C1qtnf3	10.1772	33.0619	1.69982
chr9	43909852	43917270	C1qtnf5	2.22478	3.3631	0.596129	chr9	43909852	43917270	C1qtnf5	2.31192	1.86194	-0.312282
chr15	78353775	78360081	C1qtnf6	7.27936	7.36144	0.0161761	chr15	78353775	78360081	C1qtnf6	4.75622	6.22337	0.387878
chr6	124443130	124460661	C1rl	7.62176	0.241482	-4.98014	chr6	124443130	124460661	C1rl	0.071822	1.40495	4.28994
chr6	124480361	124492377	C1s1	1.70715	0.0849267	-4.32923	chr6	124480361	124492377	C1s1	1.6972	2.37774	0.486433
chr16	98076815	98144243	C2cd2	1.42095	2.67479	0.912572	chr16	98076815	98144243	C2cd2	2.03057	2.05337	0.0161102
chr9	44117319	44128365	C2cd2l	3.97481	3.8382	-0.0504567	chr9	44117319	44128365	C2cd2l	4.54255	2.80459	-0.695713
chr7	107520742	107618668	C2cd3	2.47405	4.5818	0.889041	chr7	107520742	107618668	C2cd3	3.11443	3.39608	0.124903
chr6	142959439	143048672	C2cd5	12.1528	4.63806	-1.38969	chr6	142959439	143048672	C2cd5	10.9284	5.79158	-0.916048
chrX	34388538	34404241	C330007P06Rik	12.7546	11.9448	-0.0946339	chrX	34388538	34404241	C330007P06Rik	5.07771	6.16119	0.279031
chr18	57115484	57135033	C330018D20Rik	5.03019	4.65715	-0.111165	chr18	57115484	57135033	C330018D20Rik	2.83117	4.80477	0.763069
chr4	128896821	128938648	C77080	8.10236	4.17804	-0.955517	chr4	128896821	128938648	C77080	7.25554	5.71942	-0.343215
chr6	86388369	86430824	C87436	6.67167	4.15593	-0.682876	chr6	86388369	86430824	C87436	9.59812	6.61379	-0.537275
chr9	78023720	78026689	C920006O11Rik	10.5994	0.539278	-4.29681	chr9	78023720	78026689	C920006O11Rik	4.71274	3.72808	-0.33813
chr4	35138533	35173085	C9orf72	9.90492	6.10229	-0.698795	chr4	35138533	35173085	C9orf72	7.43117	8.67632	0.223495
chr4	94166769	94223487	Caap1	10.1529	8.94217	-0.183202	chr4	94166769	94223487	Caap1	5.30484	5.25539	-0.0135115
chr1	87690015	87748152	Cab39	17.5133	27.1009	0.629889	chr1	87690015	87748152	Cab39	14.2608	14.9343	0.066577
chr14	60059799	60167741	Cab39l	5.48874	16.4992	1.58785	chr14	60059799	60167741	Cab39l	1.90743	6.52656	1.77469
chr10	75108854	75227102	Cabin1	17.9618	8.66024	-1.05245	chr10	75108854	75227102	Cabin1	35.4392	15.2173	-1.21963
chr18	11979596	12104136	Cables1	1.05315	1.25	0.247222	chr18	11979596	12104136	Cables1	1.00553	1.08836	0.114206
chr2	179993243	180008170	Cables2	12.6	6.30434	-0.999012	chr2	179993243	180008170	Cables2	13.8624	5.91416	-1.22893
chr5	115618699	115644390	Cabp1	3.52728	0.373608	-3.23896	chr5	115618699	115644390	Cabp1	5.43228	4.81266	-0.174725
chr2	26865445	26876609	Cacfd1	18.0741	14.0992	-0.35831	chr2	26865445	26876609	Cacfd1	16.7851	9.43358	-0.831302
chr4	100449283	100676353	Cachd1	7.0194	4.71515	-0.574043	chr4	100449283	100676353	Cachd1	4.7003	3.3881	-0.472278
chr8	86939262	87164148	Cacna1a	1.4961	1.06107	-0.495691	chr8	86939262	87164148	Cacna1a	2.48265	2.29354	-0.11431
chr5	15440508	15880329	Cacna2d1	4.96613	3.10922	-0.675571	chr5	15440508	15880329	Cacna2d1	5.44795	8.28696	0.60513
chr11	97862821	97883941	Cacnb1	25.9149	8.20223	-1.65969	chr11	97862821	97883941	Cacnb1	48.5491	22.1065	-1.13498
chr15	98462758	98474967	Cacnb3	19.9076	10.6948	-0.896411	chr15	98462758	98474967	Cacnb3	24.5163	16.1414	-0.602977
chr11	107564531	107577790	Cacng1	12.7473	45.2243	1.82691	chr11	107564531	107577790	Cacng1	12.1646	17.7894	0.548324
chr11	107593670	107656020	Cacng4	6.09211	1.78895	-1.76783	chr11	107593670	107656020	Cacng4	0.703966	2.88783	2.03641
chr7	3332924	3367815	Cacng7	5.48964	14.1999	1.37109	chr7	3332924	3367815	Cacng7	8.50642	6.13963	-0.470401
chr10	80783847	80788996	Cactin	23.6313	37.2311	0.655809	chr10	80783847	80788996	Cactin	36.0521	19.4096	-0.893312
chr19	60600598	60656926	Cacul1	8.77724	10.9513	0.319267	chr19	60600598	60656926	Cacul1	4.35523	6.72474	0.626731
chr1	162132497	162143023	Cacybp	30.267	105.894	1.80681	chr1	162132497	162143023	Cacybp	11.8699	30.5619	1.36442
chr5	31357152	31380852	Cad	36.4745	55.7795	0.612844	chr5	31357152	31380852	Cad	34.4801	20.9033	-0.722033
chr9	47338252	47661474	Cadm1	10.5299	4.13059	-1.35008	chr9	47338252	47661474	Cadm1	2.35405	8.03632	1.77139
chr7	25267041	25289552	Cadm4	3.65048	9.00963	1.30338	chr7	25267041	25289552	Cadm4	3.09555	9.73572	1.65309
chr17	10512783	10514006	Cahm	1.08842	0.544855	-0.998294	chr17	10512783	10514006	Cahm	1.46152	1.24848	-0.227298
chr15	102537207	102552609	Calcoco1	22.0619	25.7745	0.22439	chr15	102537207	102552609	Calcoco1	13.9621	13.5621	-0.0419353
chr6	34548503	34725469	Cald1	70.7007	115.549	0.708712	chr6	34548503	34725469	Cald1	62.8919	207.458	1.72188
chr19	47206721	47212784	Calhm2	4.67324	10.0374	1.10289	chr19	47206721	47212784	Calhm2	2.31086	5.10113	1.14239
chr10	33757402	33829621	Calhm5	0.37335	1.16901	1.64669	chr10	33757402	33829621	Calhm5	0.332577	2.38559	2.84259
chr12	101437644	101448034	Calm1	50.838	213.672	2.07142	chr12	101437644	101448034	Calm1	34.35	153.37	2.15864
chr17	87832740	87846275	Calm2	171.929	596.363	1.79438	chr17	87832740	87846275	Calm2	105.66	154.393	0.54717
chr7	17500727	17509381	Calm3	60.5396	152.286	1.33084	chr7	17500727	17509381	Calm3	16.2188	43.1428	1.41145
chr5	130845327	131316515	Caln1	10.2373	0.112696	-6.50526	chr5	130845327	131316515	Caln1	0.404498	1.2141	1.58569
chr8	87365986	87370830	Calr	220.131	658.991	1.58189	chr8	87365986	87370830	Calr	121.212	308.062	1.34569
chr6	29298105	29330513	Calu	56.8754	138.351	1.28246	chr6	29298105	29330513	Calu	31.0584	49.6985	0.678219
chr6	113276969	113293916	Camk1	13.4901	25.9659	0.944721	chr6	113276969	113293916	Camk1	16.4036	16.7663	0.0315489
chr2	5214502	5635808	Camk1d	4.58136	0.851292	-2.42805	chr2	5214502	5635808	Camk1d	0.868418	1.29439	0.575808
chr11	5869665	5965751	Camk2b	5.89038	1.752	-1.74936	chr11	5869665	5965751	Camk2b	4.3669	1.42873	-1.61188
chr3	126299868	126549244	Camk2d	16.9725	9.23717	-0.877677	chr3	126299868	126549244	Camk2d	10.326	8.47743	-0.284586
chr14	21554094	21613310	Camk2g	48.2292	23.4774	-1.03863	chr14	21554094	21613310	Camk2g	43.0855	29.8508	-0.529435
chr4	138011062	138016041	Camk2n1	7.64052	3.71391	-1.04073	chr4	138011062	138016041	Camk2n1	3.69483	5.83046	0.658103
chr16	20611673	20645988	Camk2n2	2.52261	10.0286	1.99113	chr16	20611673	20645988	Camk2n2	2.88555	6.8509	1.24745
chr11	72832489	72855567	Camkk1	4.97971	2.37578	-1.06766	chr11	72832489	72855567	Camkk1	4.89989	2.85247	-0.780537
chr5	123181179	123229419	Camkk2	18.0575	5.97846	-1.59475	chr5	123181179	123229419	Camkk2	8.98974	12.4274	0.467179
chr17	85489965	85857929	Camkmt	2.6415	3.25641	0.301926	chr17	85489965	85857929	Camkmt	6.53994	2.81283	-1.21725
chr13	55724365	55733777	Caml	38.9482	26.9721	-0.530091	chr13	55724365	55733777	Caml	26.5375	32.2788	0.282555
chr2	25782357	25838802	Camsap1	18.6387	6.65951	-1.48481	chr2	25782357	25838802	Camsap1	18.0305	12.5424	-0.523628
chr1	138164699	138242681	Camsap2	5.89926	5.61812	-0.0704479	chr1	138164699	138242681	Camsap2	5.21307	4.47045	-0.221714
chr4	150433631	151235877	Camta1	5.3615	8.94747	0.738844	chr4	150433631	151235877	Camta1	1.93398	4.99994	1.37034
chr11	70482964	70501607	Camta2	14.4134	5.04104	-1.51561	chr11	70482964	70501607	Camta2	39.4237	17.8544	-1.14278
chr10	118635867	118677111	Cand1	19.8571	27.338	0.461248	chr10	118635867	118677111	Cand1	13.0685	15.3408	0.231283
chr6	115724574	115758761	Cand2	11.8262	13.0232	0.139101	chr6	115724574	115758761	Cand2	8.63101	4.21939	-1.0325
chr11	118267602	118280432	Cant1	25.4056	17.1041	-0.570804	chr11	118267602	118280432	Cant1	32.4624	20.3547	-0.673405
chr11	50107458	50139175	Canx	84.1431	165.133	0.972715	chr11	50107458	50139175	Canx	45.5215	103.254	1.18157
chr4	122513469	122563319	Cap1	41.3419	149.841	1.85776	chr4	122513469	122563319	Cap1	29.8122	45.1945	0.600243
chr13	46597271	46745650	Cap2	10.0072	21.2092	1.08365	chr13	46597271	46745650	Cap2	6.26063	5.8212	-0.104991
chr6	72494384	72512977	Capg	56.9424	95.7174	0.749277	chr6	72494384	72512977	Capg	93.8415	81.4669	-0.204013
chr19	5988544	6018459	Capn1	19.8737	22.6005	0.185494	chr19	5988544	6018459	Capn1	22.5352	13.7368	-0.714138
chr1	94830119	94847167	Capn10	7.59658	5.29412	-0.52096	chr1	94830119	94847167	Capn10	8.43004	5.43373	-0.633596
chr17	26083332	26122819	Capn15	23.7972	5.04488	-2.2379	chr17	26083332	26122819	Capn15	47.0375	22.4551	-1.06677
chr1	184397383	184447741	Capn2	73.5381	122.716	0.738761	chr1	184397383	184447741	Capn2	78.3469	54.9157	-0.512659
chr7	105270068	105333309	Capn5	4.37941	4.851	0.147547	chr7	105270068	105333309	Capn5	4.03651	2.30635	-0.807497
chrX	140236779	140261955	Capn6	2.12369	7.09447	1.74012	chrX	140236779	140261955	Capn6	0.365585	2.48108	2.76269
chr14	32149823	32185169	Capn7	13.1373	13.2277	0.00988701	chr14	32149823	32185169	Capn7	16.5033	11.5775	-0.51143
chr7	30971952	30980172	Capns1	109.158	517.099	2.24402	chr7	30971952	30980172	Capns1	136.305	179.57	0.397715
chr2	103603101	103637797	Caprin1	59.924	76.7609	0.357236	chr2	103603101	103637797	Caprin1	49.5642	32.2421	-0.620355
chr6	148791013	148844759	Caprin2	13.2256	3.24362	-2.02765	chr6	148791013	148844759	Caprin2	14.8271	7.20307	-1.04156
chr3	104625698	104667423	Capza1	13.6299	29.1355	1.09601	chr3	104625698	104667423	Capza1	16.9786	10.0812	-0.752059
chr6	17587009	17616972	Capza2	32.1304	75.9069	1.24029	chr6	17587009	17616972	Capza2	20.3284	36.5622	0.846855
chr4	138748813	138847735	Capzb	77.4415	264.631	1.7728	chr4	138748813	138847735	Capzb	64.4659	109.749	0.7676
chr9	66561492	66614652	Car12	1.68218	1.43503	-0.22925	chr9	66561492	66614652	Car12	1.36062	1.78973	0.395474
chr3	14641726	14663002	Car13	8.35385	5.20882	-0.681486	chr3	14641726	14663002	Car13	1.66188	4.27546	1.36327
chr16	17835368	17838279	Car15	1.23878	0.296556	-2.06255	chr16	17835368	17838279	Car15	6.80971	2.59942	-1.3894
chrX	160414753	160465942	Car5b	6.20837	5.88275	-0.077724	chrX	160414753	160465942	Car5b	3.13047	7.24095	1.2098
chr15	78605565	78633472	Card10	2.1763	1.05578	-1.04358	chr15	78605565	78633472	Card10	11.7037	5.67095	-1.04531
chr13	49298319	49311395	Card19	30.4267	74.3873	1.28972	chr13	49298319	49311395	Card19	16.5296	18.7142	0.179085
chr15	5047438	5058533	Card6	3.17671	2.65009	-0.261492	chr15	5047438	5058533	Card6	3.17534	1.57898	-1.00792
chr1	60133711	60210797	Carf	6.11813	0.744986	-3.03781	chr1	60133711	60210797	Carf	2.82219	0.947653	-1.57439
chr16	8658679	8672246	Carhsp1	32.6901	73.5659	1.17019	chr16	8658679	8672246	Carhsp1	14.7736	29.6873	1.00683
chr9	21351337	21400414	Carm1	29.7039	55.0993	0.891381	chr9	21351337	21400414	Carm1	38.5132	19.3376	-0.993943
chr13	24104349	24372659	Carmil1	1.07815	2.41464	1.16325	chr13	24104349	24372659	Carmil1	2.37907	1.75328	-0.44034
chr18	61799306	61825192	Carmn	3.76434	0.309658	-3.60365	chr18	61799306	61825192	Carmn	3.51259	1.46581	-1.26083
chr19	18745269	18779282	Carnmt1	3.22028	7.77628	1.27189	chr19	18745269	18779282	Carnmt1	1.68305	3.31719	0.978884
chr19	4164323	4175479	Carns1	24.5927	7.07247	-1.79795	chr19	4164323	4175479	Carns1	22.8195	7.21692	-1.66081
chr7	150743134	150785995	Cars	54.8402	56.2652	0.0370083	chr7	150743134	150785995	Cars	81.9004	66.2621	-0.305686
chr8	11514016	11550771	Cars2	15.2034	14.5669	-0.0617052	chr8	11514016	11550771	Cars2	19.7459	8.41026	-1.23133
chr11	98656829	98695121	Casc3	40.819	25.4614	-0.680927	chr11	98656829	98695121	Casc3	42.5388	28.4921	-0.578219
chr2	121692705	121761943	Casc4	8.20246	16.343	0.994541	chr2	121692705	121761943	Casc4	5.21607	9.15889	0.812208
chr6	4550910	4593381	Casd1	8.27069	8.29861	0.0048626	chr6	4550910	4593381	Casd1	11.6727	9.71132	-0.2654
chrX	13094207	13423682	Cask	3.7098	3.85949	0.0570685	chrX	13094207	13423682	Cask	1.25843	3.22131	1.35602
chr17	24625727	24664883	Caskin1	1.1457	0.160903	-2.83197	chr17	24625727	24664883	Caskin1	1.98914	0.615232	-1.69294
chr11	115660665	115674906	Caskin2	13.4232	6.45369	-1.05654	chr11	115660665	115674906	Caskin2	18.4683	6.79202	-1.44314
chr9	5345475	5373034	Casp12	0.674209	2.31923	1.78238	chr9	5345475	5373034	Casp12	0.81477	2.16683	1.41112
chr6	42214983	42232507	Casp2	16.8613	10.8426	-0.637002	chr6	42214983	42232507	Casp2	5.3904	4.9256	-0.130094
chr8	47702644	47725052	Casp3	11.3108	22.8822	1.01653	chr8	47702644	47725052	Casp3	9.27463	7.28294	-0.348769
chr3	129604332	129617030	Casp6	5.13339	17.2468	1.74835	chr3	129604332	129617030	Casp6	4.30415	10.2544	1.25244
chr19	56471618	56516833	Casp7	7.93291	10.9398	0.463666	chr19	56471618	56516833	Casp7	5.76458	6.6976	0.21643
chr1	58852217	58904347	Casp8	16.019	15.2622	-0.0698223	chr1	58852217	58904347	Casp8	14.3973	11.7434	-0.293953
chr4	32702444	32740246	Casp8ap2	8.18552	5.19802	-0.655112	chr4	32702444	32740246	Casp8ap2	12.4077	8.15806	-0.604937
chr4	141349526	141381920	Casp9	6.18433	3.06874	-1.01097	chr4	141349526	141381920	Casp9	4.12878	1.91474	-1.10857
chr13	74830741	74946208	Cast	30.8674	32.2955	0.0652501	chr13	74830741	74946208	Cast	39.2822	34.6503	-0.181006
chr11	4118227	4122412	Castor1	1.9326	3.54877	0.87678	chr11	4118227	4122412	Castor1	7.3852	1.84233	-2.0031
chr5	134575617	134617628	Castor2	3.17153	3.39196	0.0969396	chr5	134575617	134617628	Castor2	4.80572	2.60255	-0.884826
chr4	148178500	148329001	Casz1	9.36554	0.194643	-5.58846	chr4	148178500	148329001	Casz1	0.848157	1.10026	0.375445
chr2	103294060	103325310	Cat	11.5685	34.1413	1.56131	chr2	103294060	103325310	Cat	13.7455	16.8347	0.292479
chr2	121220090	121239528	Catsper2	2.51471	0.751694	-1.74217	chr2	121220090	121239528	Catsper2	2.72407	0.614684	-2.14784
chr6	17256334	17291328	Cav1	83.8943	286.688	1.77284	chr6	17256334	17291328	Cav1	31.2935	61.3323	0.970784
chr6	17231184	17239130	Cav2	3.45967	14.4133	2.05869	chr6	17231184	17239130	Cav2	1.53236	10.5119	2.77819
chr6	112409498	112422866	Cav3	3.35712	21.2856	2.66458	chr6	112409498	112422866	Cav3	4.10951	9.34716	1.18556
chr11	100818050	100831931	Cavin1	59.8516	140.188	1.2279	chr11	100818050	100831931	Cavin1	14.7943	46.8514	1.66305
chr1	51275229	51390623	Cavin2	22.107	49.615	1.16628	chr1	51275229	51390623	Cavin2	5.26532	11.8582	1.1713
chr7	112629129	112630711	Cavin3	19.1205	125.252	2.71163	chr7	112629129	112630711	Cavin3	5.0708	19.9355	1.97505
chr4	48676385	48686364	Cavin4	9.51991	13.0615	0.456303	chr4	48676385	48686364	Cavin4	2.68965	4.43173	0.72045
chr10	79578539	79602112	Cbarp	6.68156	3.76485	-0.827593	chr10	79578539	79602112	Cbarp	9.49996	5.73017	-0.729343
chr2	154262219	154365092	Cbfa2t2	9.51148	6.23479	-0.609328	chr2	154262219	154365092	Cbfa2t2	4.11766	4.29663	0.0613795
chr8	107694573	107741888	Cbfb	35.373	82.4766	1.22134	chr8	107694573	107741888	Cbfb	24.4205	59.0612	1.27412
chr9	43957344	44042129	Cbl	2.21385	0.713153	-1.63427	chr9	43957344	44042129	Cbl	2.06184	0.425158	-2.27786
chr16	52031661	52208159	Cblb	6.85561	4.20256	-0.706017	chr16	52031661	52208159	Cblb	4.35668	2.39938	-0.860567
chr12	32169693	32184481	Cbll1	4.55311	6.89123	0.597909	chr12	32169693	32184481	Cbll1	5.44267	5.17637	-0.0723743
chr16	93608081	93610594	Cbr1	10.8417	42.0946	1.95704	chr16	93608081	93610594	Cbr1	12.6681	24.7082	0.963782
chr11	120590798	120593335	Cbr2	5.32969	0.782388	-2.76809	chr11	120590798	120593335	Cbr2	0.812434	4.42566	2.44557
chr16	93683463	93691236	Cbr3	7.71205	40.7478	2.40154	chr16	93683463	93691236	Cbr3	12.4719	11.882	-0.0699012
chr8	63966530	63982297	Cbr4	6.59118	13.7627	1.06216	chr8	63966530	63982297	Cbr4	5.00918	12.8074	1.35433
chr17	31749567	31774150	Cbs	0.774294	1.4143	0.869139	chr17	31749567	31774150	Cbs	1.45314	0.0932799	-3.96146
chr19	24994405	25036106	Cbwd1	9.17217	7.88441	-0.218261	chr19	24994405	25036106	Cbwd1	5.6792	6.01986	0.0840416
chr11	96650448	96669957	Cbx1	88.5568	125.772	0.506136	chr11	96650448	96669957	Cbx1	49.815	144.486	1.53628
chr11	118884334	118892589	Cbx2	15.6822	6.83181	-1.19879	chr11	118884334	118892589	Cbx2	6.60919	6.60434	-0.00105904
chr6	51420614	51433703	Cbx3	21.7202	55.8977	1.36375	chr6	51420614	51433703	Cbx3	7.58052	9.30228	0.295288
chr11	118938884	118947551	Cbx4	6.70902	6.03921	-0.151744	chr11	118938884	118947551	Cbx4	5.56291	8.08209	0.53889
chr15	103021976	103070283	Cbx5	38.8412	39.7079	0.0318389	chr15	103021976	103070283	Cbx5	13.6721	21.8091	0.673696
chr15	79616780	79664763	Cbx6	29.0152	20.0259	-0.534938	chr15	79616780	79664763	Cbx6	14.8225	36.8577	1.31417
chr15	79746236	79763076	Cbx7	16.2334	2.9548	-2.45783	chr15	79746236	79763076	Cbx7	10.0339	4.32695	-1.21346
chr11	118899749	118902227	Cbx8	4.65042	5.16086	0.150248	chr11	118899749	118902227	Cbx8	3.90883	4.43164	0.181105
chr15	79489656	79498090	Cby1	8.18615	36.7618	2.16695	chr15	79489656	79498090	Cby1	6.34018	17.3856	1.4553
chr8	86656726	86671816	Cc2d1a	19.5973	10.1203	-0.953409	chr8	86656726	86671816	Cc2d1a	18.4553	8.69071	-1.08649
chr4	108292560	108306727	Cc2d1b	39.4092	18.086	-1.12366	chr4	108292560	108306727	Cc2d1b	35.6101	22.857	-0.639648
chr5	44053617	44132209	Cc2d2a	4.21644	2.73341	-0.625323	chr5	44053617	44132209	Cc2d2a	6.63926	3.45743	-0.941325
chr10	62206675	62255116	Ccar1	60.2369	62.7792	0.0596384	chr10	62206675	62255116	Ccar1	80.9049	123.079	0.605291
chr14	70537975	70553598	Ccar2	31.1848	23.0625	-0.435291	chr14	70537975	70553598	Ccar2	40.3258	19.4689	-1.05054
chr8	97426768	97441998	Ccdc102a	7.48871	8.91349	0.251273	chr8	97426768	97441998	Ccdc102a	14.2255	16.5926	0.222058
chr4	43506236	43508793	Ccdc107	42.6723	42.5004	-0.00582258	chr4	43506236	43508793	Ccdc107	38.6054	49.8272	0.368132
chr18	46441804	46471582	Ccdc112	1.48627	4.53702	1.61005	chr18	46441804	46471582	Ccdc112	1.8725	2.7991	0.579998
chr7	53179584	53204333	Ccdc114	7.12205	0.70048	-3.34588	chr7	53179584	53204333	Ccdc114	5.21589	1.38064	-1.91757
chr1	34493514	34496517	Ccdc115	18.7468	15.7626	-0.250134	chr1	34493514	34496517	Ccdc115	14.6658	12.7048	-0.207081
chr16	17139156	17148950	Ccdc116	4.12645	0.126538	-5.02725	chr16	17139156	17148950	Ccdc116	1.20503	1.44833	0.265325
chr11	5428890	5442220	Ccdc117	16.9831	10.578	-0.683032	chr11	5428890	5442220	Ccdc117	8.39251	5.58544	-0.58743
chr9	110559006	110614097	Ccdc12	35.8499	90.5648	1.33698	chr9	110559006	110614097	Ccdc12	35.4845	49.5829	0.482655
chrX	7308839	7318450	Ccdc120	4.43646	1.78045	-1.31716	chrX	7308839	7318450	Ccdc120	3.87756	1.75242	-1.1458
chr14	77436578	77512070	Ccdc122	0.56533	2.50661	2.14857	chr14	77436578	77512070	Ccdc122	2.5086	2.39715	-0.0655663
chr8	73392125	73397389	Ccdc124	71.2166	220.024	1.62738	chr8	73392125	73397389	Ccdc124	88.4499	107.543	0.281977
chr6	49269272	49291584	Ccdc126	0.817561	2.24282	1.45591	chr6	49269272	49291584	Ccdc126	1.35341	2.3252	0.780756
chr13	74487764	74503231	Ccdc127	9.63388	18.5234	0.943164	chr13	74487764	74503231	Ccdc127	5.65144	10.3633	0.874787
chr8	86781665	86794301	Ccdc130	10.1408	5.3609	-0.919619	chr8	86781665	86794301	Ccdc130	15.5561	8.55897	-0.861971
chr15	81958351	81972632	Ccdc134	59.5311	13.9602	-2.09232	chr15	81958351	81972632	Ccdc134	37.745	28.4457	-0.408077
chr6	29346574	29376995	Ccdc136	1.27136	1.71453	0.431443	chr6	29346574	29376995	Ccdc136	1.39231	2.20672	0.664425
chr11	120319442	120328914	Ccdc137	22.8982	8.96133	-1.35345	chr11	120319442	120328914	Ccdc137	51.4416	30.7151	-0.743987
chr10	57960684	58038992	Ccdc138	1.39322	1.15471	-0.270893	chr10	57960684	58038992	Ccdc138	2.42253	2.21421	-0.129722
chr16	34690701	34725280	Ccdc14	11.3479	2.7229	-2.05921	chr16	34690701	34725280	Ccdc14	6.25315	3.24335	-0.947098
chr2	76847962	77008692	Ccdc141	4.71059	1.39157	-1.75919	chr2	76847962	77008692	Ccdc141	5.13812	1.31743	-1.96351
chr6	83051509	83059926	Ccdc142	2.00671	0.253789	-2.98313	chr6	83051509	83059926	Ccdc142	4.33572	1.27543	-1.76528
chr9	37075048	37155942	Ccdc15	1.82169	1.03627	-0.813869	chr9	37075048	37155942	Ccdc15	0.92219	1.71707	0.896812
chr11	4035162	4060296	Ccdc157	10.0766	1.98751	-2.34198	chr11	4035162	4060296	Ccdc157	9.29883	4.32296	-1.10503
chr4	116381199	116388288	Ccdc163	19.4565	5.41964	-1.84399	chr4	116381199	116388288	Ccdc163	23.2597	9.42361	-1.30348
chr15	75810301	75812715	Ccdc166	2.00662	1.98078	-0.0186981	chr15	75810301	75812715	Ccdc166	0.657577	2.19374	1.73816
chr17	29751733	29853962	Ccdc167	6.79308	10.1337	0.577017	chr17	29751733	29853962	Ccdc167	4.65492	3.56571	-0.384567
chr4	83171448	83512047	Ccdc171	5.72395	0.215567	-4.73081	chr4	83171448	83512047	Ccdc171	1.44359	1.54855	0.101254
chr2	69596113	69627543	Ccdc173	1.69782	2.17812	0.359397	chr2	69596113	69627543	Ccdc173	4.56204	4.12502	-0.145278
chr6	91828046	91849842	Ccdc174	12.375	14.4087	0.219511	chr6	91828046	91849842	Ccdc174	14.7075	14.4447	-0.026017
chr5	108561932	108661968	Ccdc18	2.75309	1.76954	-0.637682	chr5	108561932	108661968	Ccdc18	1.80915	3.11931	0.785919
chr1	166205728	166217978	Ccdc181	1.76873	3.7923	1.10035	chr1	166205728	166217978	Ccdc181	3.82273	0.986912	-1.95361
chr15	97998236	98000565	Ccdc184	5.6089	3.22227	-0.799639	chr15	97998236	98000565	Ccdc184	3.52024	6.38268	0.858488
chr19	56861974	56896689	Ccdc186	9.63174	4.09493	-1.23396	chr19	56861974	56896689	Ccdc186	8.30157	6.85376	-0.276488
chr7	134716861	134732109	Ccdc189	2.32346	1.06039	-1.13168	chr7	134716861	134732109	Ccdc189	3.12515	2.02374	-0.626899
chr16	43890014	43964427	Ccdc191	7.77771	4.47804	-0.796477	chr16	43890014	43964427	Ccdc191	9.98277	12.1722	0.28608
chrX	7135687	7182546	Ccdc22	17.3211	16.2916	-0.0883949	chrX	7135687	7182546	Ccdc22	23.2921	15.5648	-0.581554
chr4	117507862	117545075	Ccdc24	4.04699	1.77793	-1.18665	chr4	117507862	117545075	Ccdc24	42.5298	20.2808	-1.06836
chr14	66456138	66485441	Ccdc25	11.4252	23.9665	1.0688	chr14	66456138	66485441	Ccdc25	8.99554	30.6142	1.76692
chr10	17933481	17954787	Ccdc28a	2.62394	2.42409	-0.114291	chr10	17933481	17954787	Ccdc28a	7.8739	3.46336	-1.1849
chr4	129296517	129301152	Ccdc28b	3.14293	3.84028	0.289101	chr4	129296517	129301152	Ccdc28b	12.4525	6.09027	-1.03186
chr2	118843514	118855129	Ccdc32	8.33068	12.6609	0.603874	chr2	118843514	118855129	Ccdc32	4.87416	8.28807	0.765883
chr2	109857973	109890636	Ccdc34	24.8609	66.9143	1.42844	chr2	109857973	109890636	Ccdc34	17.9927	64.4139	1.83996
chr10	93003376	93067990	Ccdc38	6.91452	0.224238	-4.94653	chr10	93003376	93067990	Ccdc38	1.63016	0.518701	-1.65204
chr11	102546001	102559039	Ccdc43	18.0966	15.3358	-0.238813	chr11	102546001	102559039	Ccdc43	16.4743	6.73896	-1.28962
chr11	106060669	106077681	Ccdc47	21.7508	31.4328	0.531203	chr11	106060669	106077681	Ccdc47	17.59	24.3158	0.467141
chr16	27389041	27452304	Ccdc50	13.9851	11.2321	-0.316261	chr16	27389041	27452304	Ccdc50	8.78387	7.77095	-0.176766
chr9	108985009	108995877	Ccdc51	8.21279	9.68658	0.238115	chr9	108985009	108995877	Ccdc51	8.43607	3.13722	-1.42708
chr11	120687855	120794186	Ccdc57	1.58706	1.15825	-0.454407	chr11	120687855	120794186	Ccdc57	5.00082	2.28545	-1.12969
chr16	36071745	36092204	Ccdc58	19.7174	87.6504	2.15229	chr16	36071745	36092204	Ccdc58	20.1173	49.1213	1.28791
chr10	105278534	105284566	Ccdc59	27.3348	47.014	0.782354	chr10	105278534	105284566	Ccdc59	17.0614	35.2682	1.04763
chr10	69559868	69655948	Ccdc6	15.0176	15.1975	0.0171827	chr10	69559868	69655948	Ccdc6	6.71476	9.85765	0.553907
chr7	19476232	19495753	Ccdc61	17.9877	10.3696	-0.794647	chr7	19476232	19495753	Ccdc61	22.877	7.30034	-1.64786
chr14	28242019	28321646	Ccdc66	10.4216	5.91911	-0.816122	chr14	28242019	28321646	Ccdc66	11.2535	6.76635	-0.73392
chr9	108349969	108368276	Ccdc71	12.0995	19.6586	0.700213	chr9	108349969	108368276	Ccdc71	4.34627	8.71932	1.00444
chr12	33063653	33067808	Ccdc71l	5.02135	7.89589	0.653026	chr12	33063653	33067808	Ccdc71l	3.50963	7.65323	1.12475
chr16	17646562	17650831	Ccdc74a	2.46271	0.923298	-1.41538	chr16	17646562	17650831	Ccdc74a	1.24907	0.393381	-1.66685
chr6	120274339	120394592	Ccdc77	20.0219	5.85133	-1.77474	chr6	120274339	120394592	Ccdc77	14.6406	6.73858	-1.11946
chr7	17579250	17582864	Ccdc8	6.46636	8.90098	0.46101	chr7	17579250	17582864	Ccdc8	2.62995	1.70356	-0.626481
chr16	45094123	45128037	Ccdc80	6.21215	2.80651	-1.14632	chr16	45094123	45128037	Ccdc80	3.68789	6.83578	0.890312
chr9_random	372055	417453	Ccdc82	26.0095	4.21145	-2.62665	chr9_random	372055	417453	Ccdc82	20.6946	8.82252	-1.23
chr9	44215796	44226152	Ccdc84	21.4794	5.99569	-1.84096	chr9	44215796	44226152	Ccdc84	37.2686	22.4527	-0.731071
chr19	5447697	5457563	Ccdc85b	29.7569	41.5443	0.481427	chr19	5447697	5457563	Ccdc85b	43.0694	42.4791	-0.0199102
chr12	109441809	109513603	Ccdc85c	4.53066	2.22517	-1.02581	chr12	109441809	109513603	Ccdc85c	1.40784	1.12163	-0.327889
chr19	11011649	11023756	Ccdc86	21.6738	24.0014	0.147167	chr19	11011649	11023756	Ccdc86	8.89653	8.92489	0.00459261
chr11	29273657	29410808	Ccdc88a	13.6727	9.73731	-0.489707	chr11	29273657	29410808	Ccdc88a	18.3305	22.9455	0.323967
chr19	6919112	6932701	Ccdc88b	1.00343	0.703685	-0.511935	chr19	6919112	6932701	Ccdc88b	2.09026	0.527369	-1.9868
chr12	102149732	102267101	Ccdc88c	5.0123	0.883193	-2.50467	chr12	102149732	102267101	Ccdc88c	1.86632	0.488565	-1.93357
chr7	16859390	16872144	Ccdc9	75.6915	22.9311	-1.72282	chr7	16859390	16872144	Ccdc9	102.105	37.0945	-1.46077
chr7	99709658	99730804	Ccdc90b	6.28685	18.2661	1.53876	chr7	99709658	99730804	Ccdc90b	5.58773	9.10166	0.703868
chr6	147424392	147581134	Ccdc91	2.67266	8.88117	1.73247	chr6	147424392	147581134	Ccdc91	3.02375	7.91458	1.38817
chr1	123327643	123403037	Ccdc93	6.2363	2.91655	-1.09643	chr1	123327643	123403037	Ccdc93	4.67165	2.28507	-1.0317
chr7	26496130	26504054	Ccdc97	28.1215	18.2578	-0.623157	chr7	26496130	26504054	Ccdc97	30.9377	19.9777	-0.630978
chr2	118579880	118588397	Ccdc9b	39.3588	3.40863	-3.52942	chr2	118579880	118588397	Ccdc9b	52.9689	19.7692	-1.42189
chr17	35653993	35667960	Cchcr1	43.9584	11.5634	-1.92657	chr17	35653993	35667960	Cchcr1	35.8451	18.1605	-0.980973
chr11	81871333	81876457	Ccl11	0.321749	3.20645	3.31697	chr11	81871333	81876457	Ccl11	0.0841735	2.2002	4.70813
chr11	81849078	81850954	Ccl2	7.98576	17.3664	1.1208	chr11	81849078	81850954	Ccl2	29.9451	39.4337	0.397107
chr8	4325209	4360020	Ccl25	8.25379	6.06479	-0.444599	chr8	4325209	4360020	Ccl25	22.0895	12.1805	-0.858782
chr4	41707315	41721049	Ccl27a	3.83399	9.68566	1.33701	chr4	41707315	41721049	Ccl27a	7.59767	3.53326	-1.10456
chr11	81859213	81861025	Ccl7	15.5715	8.92676	-0.802702	chr11	81859213	81861025	Ccl7	17.9747	27.217	0.598539
chr11	6446889	6496764	Ccm2	41.3528	41.7189	0.0127152	chr11	6446889	6496764	Ccm2	34.1923	30.4053	-0.169346
chr3	145309934	145312949	Ccn1	647.326	551.535	-0.231039	chr3	145309934	145312949	Ccn1	1333.75	1572.01	0.237121
chr10	24051493	24318488	Ccn2	16.5588	13.8212	-0.260715	chr10	24051493	24318488	Ccn2	39.588	39.6441	0.00204323
chr15	66722930	66754763	Ccn4	23.4925	12.906	-0.864155	chr15	66722930	66754763	Ccn4	11.4175	24.9101	1.12549
chr2	163646569	163658883	Ccn5	0.954575	1.16896	0.292302	chr2	163646569	163658883	Ccn5	0.308197	1.19652	1.95692
chr3	36451527	36471960	Ccna2	36.8095	97.3941	1.40376	chr3	36451527	36471960	Ccna2	8.55749	19.4487	1.18441
chr13	101548693	101556441	Ccnb1	67.4531	127.374	0.917119	chr13	101548693	101556441	Ccnb1	15.6339	25.2323	0.690593
chr9	70255495	70269361	Ccnb2	25.3377	108.973	2.10462	chr9	70255495	70269361	Ccnb2	5.865	12.7145	1.11627
chr4	21654847	21694358	Ccnc	22.883	19.8412	-0.205781	chr4	21654847	21694358	Ccnc	7.47308	11.5918	0.633325
chr7	152101004	152125830	Ccnd1	130.398	259.478	0.992694	chr7	152101004	152125830	Ccnd1	142.934	189.839	0.409427
chr6	127075726	127162437	Ccnd2	7.86844	7.18671	-0.130747	chr6	127075726	127162437	Ccnd2	6.00487	21.3851	1.8324
chr17	47641999	47748441	Ccnd3	82.5147	255.904	1.63288	chr17	47641999	47748441	Ccnd3	35.3473	65.8497	0.897577
chr2	120834143	120842648	Ccndbp1	16.7714	19.6773	0.230525	chr2	120834143	120842648	Ccndbp1	19.1016	19.7928	0.0512801
chr7	38883002	38892509	Ccne1	24.5291	43.8913	0.83944	chr7	38883002	38892509	Ccne1	7.22491	9.1774	0.345107
chr4	11118497	11181406	Ccne2	6.86623	9.35424	0.446102	chr4	11118497	11181406	Ccne2	2.57322	9.55494	1.89267
chr17	24360176	24388354	Ccnf	36.3326	37.2375	0.0354913	chr17	24360176	24388354	Ccnf	22.5212	15.8603	-0.505865
chr11	40562053	40568788	Ccng1	49.6542	127.607	1.36172	chr11	40562053	40568788	Ccng1	31.7344	58.9321	0.893007
chr5	93696598	93705257	Ccng2	33.2797	22.7398	-0.549421	chr5	93696598	93705257	Ccng2	16.1227	22.6453	0.490115
chr13	85328989	85353336	Ccnh	14.5842	19.742	0.436868	chr13	85328989	85353336	Ccnh	5.62306	13.2991	1.2419
chr5	93610958	93635521	Ccni	20.3717	86.1949	2.08104	chr5	93610958	93635521	Ccni	12.9094	26.0518	1.01295
chr19	40905768	40923060	Ccnj	9.12192	2.44707	-1.89828	chr19	40905768	40923060	Ccnj	2.70038	2.8067	0.0557144
chr12	109417947	109441569	Ccnk	18.3748	24.4413	0.411593	chr12	109417947	109441569	Ccnk	14.1834	17.7389	0.322714
chr3	65750073	65762171	Ccnl1	140.035	20.1126	-2.79962	chr3	65750073	65762171	Ccnl1	159.987	93.1434	-0.780425
chr4	155186597	155198652	Ccnl2	306.643	30.5086	-3.32927	chr4	155186597	155198652	Ccnl2	883.482	304.269	-1.53785
chr11	78564007	78565231	Ccnq	9.40711	36.1104	1.94059	chr11	78564007	78565231	Ccnq	7.11751	15.7592	1.14675
chr15	98369120	98401295	Ccnt1	25.4812	13.5345	-0.912796	chr15	98369120	98401295	Ccnt1	26.5474	29.0108	0.128021
chr1	129670740	129701414	Ccnt2	53.9095	4.82358	-3.48236	chr1	129670740	129701414	Ccnt2	39.6296	16.8105	-1.23721
chr18	9312301	9450152	Ccny	7.72023	13.8574	0.843938	chr18	9312301	9450152	Ccny	5.58652	7.91371	0.502404
chr1	64737918	64772216	Ccnyl1	14.8697	18.6472	0.326583	chr1	64737918	64772216	Ccnyl1	10.9412	10.1645	-0.10623
chr7	125856056	125880537	Ccp110	17.164	5.36329	-1.67819	chr7	125856056	125880537	Ccp110	14.2106	9.58741	-0.56775
chr9	72833310	72887506	Ccpg1	4.60752	5.95499	0.370108	chr9	72833310	72887506	Ccpg1	2.82846	4.79192	0.760587
chr9	72827532	72833183	Ccpg1os	0.869821	6.0092	2.78838	chr9	72827532	72833183	Ccpg1os	1.72102	3.03076	0.816414
chr19	4825365	4839322	Ccs	24.3723	36.4788	0.581812	chr19	4825365	4839322	Ccs	36.1421	18.4646	-0.968917
chr8	126364743	126384109	Ccsap	5.83902	4.57748	-0.351173	chr8	126364743	126384109	Ccsap	1.34369	1.9344	0.525686
chr14	37688121	37781950	Ccser2	16.17	9.10708	-0.82826	chr14	37688121	37781950	Ccser2	12.0331	12.1982	0.0196683
chr10	116488052	116500908	Cct2	124.042	353.261	1.50991	chr10	116488052	116500908	Cct2	114.53	120.617	0.0747025
chr3	88101056	88125688	Cct3	139.434	377.708	1.43769	chr3	88101056	88125688	Cct3	124.204	115.38	-0.106322
chr11	22890592	22903336	Cct4	89.7991	223.748	1.3171	chr11	22890592	22903336	Cct4	58.586	72.3104	0.303647
chr15	31520554	31531601	Cct5	96.2519	252.21	1.38974	chr15	31520554	31531601	Cct5	45.6448	50.7016	0.151581
chr5	130293231	130322319	Cct6a	74.2461	241.147	1.69953	chr5	130293231	130322319	Cct6a	58.3771	117.218	1.00572
chr6	85396778	85418471	Cct7	67.7695	288.545	2.09009	chr6	85396778	85418471	Cct7	42.3139	107.428	1.34416
chr16	87455229	87496114	Cct8	88.1554	298.787	1.761	chr16	87455229	87496114	Cct8	76.5752	132.258	0.788402
chr5	144748777	144775722	Ccz1	15.937	39.8675	1.32284	chr5	144748777	144775722	Ccz1	21.1538	16.5921	-0.350424
chr9	78463352	78564067	Cd109	1.84484	8.02852	2.12164	chr9	78463352	78564067	Cd109	2.27693	2.00372	-0.184408
chr18	36884717	36886469	Cd14	2.08359	1.70364	-0.290453	chr18	36884717	36886469	Cd14	2.85444	3.16508	0.149035
chr7	148646992	148657380	Cd151	73.0633	189.412	1.37431	chr7	148646992	148657380	Cd151	87.6204	90.9259	0.0534234
chr10	41239305	41250848	Cd164	44.607	114.51	1.36013	chr10	41239305	41250848	Cd164	22.8055	45.9646	1.01114
chr3	86799757	86803262	Cd1d1	4.9768	2.13446	-1.22134	chr3	86799757	86803262	Cd1d1	1.49212	0.126553	-3.55956
chr16	45382247	45409166	Cd200	70.9498	86.4824	0.285608	chr16	45382247	45409166	Cd200	23.0648	45.5179	0.980741
chr19	5068077	5070639	Cd248	0.572294	1.90319	1.73359	chr19	5068077	5070639	Cd248	0.172132	2.22307	3.69096
chr9	58372106	58388747	Cd276	11.016	19.6531	0.835161	chr9	58372106	58388747	Cd276	6.7926	9.12878	0.426459
chr17	42929899	43013373	Cd2ap	15.443	14.6859	-0.0725232	chr17	42929899	43013373	Cd2ap	12.9092	8.51773	-0.599861
chr7	134335173	134339591	Cd2bp2	33.2344	23.3431	-0.509682	chr7	134335173	134339591	Cd2bp2	22.5588	13.4418	-0.746965
chr2	60090049	60122541	Cd302	5.59887	19.6234	1.80937	chr2	60090049	60122541	Cd302	7.74225	8.09436	0.0641646
chr17	33980035	33986719	Cd320	4.85615	16.5643	1.7702	chr17	33980035	33986719	Cd320	4.45399	3.8471	-0.211326
chr1	196765014	196803153	Cd34	11.4125	14.3872	0.334174	chr1	196765014	196803153	Cd34	22.5414	31.5281	0.48406
chr5	44260047	44303613	Cd38	9.76832	0.0226906	-8.74987	chr5	44260047	44303613	Cd38	0.33412	1.03584	1.63237
chr7	19930419	19944832	Cd3eap	36.7605	46.6941	0.345086	chr7	19930419	19944832	Cd3eap	43.6686	57.3836	0.394043
chr2	102651299	102741822	Cd44	75.6734	155.515	1.0392	chr2	102651299	102741822	Cd44	65.5733	206.923	1.65791
chr16	49855766	49912541	Cd47	20.9867	28.0642	0.419257	chr16	49855766	49912541	Cd47	10.8367	43.1579	1.9937
chr1	132335602	132359321	Cd55	3.30055	5.20216	0.656406	chr1	132335602	132359321	Cd55	7.83719	15.632	0.996094
chr1	132285104	132334491	Cd55os	1.22964	0.0173343	-6.14846	chr1	132285104	132334491	Cd55os	1.01892	0.0942129	-3.43498
chr2	103935957	103955567	Cd59a	15.4273	1.61334	-3.25736	chr2	103935957	103955567	Cd59a	0.790232	7.73744	3.29151
chr10	128345974	128349874	Cd63	956.363	2769.36	1.53392	chr10	128345974	128349874	Cd63	492.569	714.026	0.535653
chr11	69477714	69479672	Cd68	2.89737	5.34573	0.883645	chr11	69477714	69479672	Cd68	8.41255	2.46149	-1.77301
chr18	60963502	60972306	Cd74	2.50882	0.236258	-3.40857	chr18	60963502	60972306	Cd74	0.422688	1.24561	1.55919
chr16	38459012	38496040	Cd80	13.9821	8.57249	-0.705795	chr16	38459012	38496040	Cd80	14.3833	8.78021	-0.712071
chr7	150207688	150253835	Cd81	114.115	421.752	1.88591	chr7	150207688	150253835	Cd81	129.418	196.101	0.599564
chr2	93259258	93310031	Cd82	95.4525	309.506	1.69711	chr2	93259258	93310031	Cd82	66.6929	101.327	0.603418
chr6	125410283	125444778	Cd9	79.8191	430.022	2.42961	chr6	125410283	125444778	Cd9	51.2426	473.413	3.20768
chrX	68673234	68746024	Cd99l2	8.5689	6.877	-0.317332	chrX	68673234	68746024	Cd99l2	3.72072	2.83951	-0.389938
chr4	137894442	137923870	Cda	0.31595	1.8212	2.52712	chr4	137894442	137923870	Cda	0.256198	1.42609	2.47673
chr14	60178224	60216796	Cdadc1	12.7584	6.37591	-1.00075	chr14	60178224	60216796	Cdadc1	6.75456	5.40483	-0.321613
chr2	120541889	120557253	Cdan1	13.9353	3.25906	-2.09621	chr2	120541889	120557253	Cdan1	10.6061	4.95582	-1.0977
chr2	5715339	5789782	Cdc123	20.1198	63.3073	1.65376	chr2	5715339	5789782	Cdc123	18.2844	35.2495	0.946988
chr3	115975470	116126950	Cdc14a	5.57783	2.01794	-1.46682	chr3	115975470	116126950	Cdc14a	4.97081	3.8824	-0.356533
chr13	64293852	64376296	Cdc14b	13.0324	4.49109	-1.53696	chr13	64293852	64376296	Cdc14b	6.49333	12.8419	0.983827
chr8	13757655	13781951	Cdc16	37.126	46.3887	0.321342	chr8	13757655	13781951	Cdc16	47.6606	39.835	-0.258759
chr4	118100697	118109948	Cdc20	74.8457	180.589	1.27072	chr4	118100697	118109948	Cdc20	16.7653	34.7027	1.04957
chr18	34758268	34811390	Cdc23	17.3688	20.768	0.257862	chr18	34758268	34811390	Cdc23	14.0012	8.95676	-0.644501
chr9	109778082	109796394	Cdc25a	24.3723	16.0541	-0.602301	chr9	109778082	109796394	Cdc25a	11.3886	9.93446	-0.197074
chr2	131012683	131024247	Cdc25b	108.043	76.3288	-0.5013	chr2	131012683	131024247	Cdc25b	150.254	60.122	-1.32144
chr18	34892648	34911187	Cdc25c	12.5536	12.0507	-0.0589874	chr18	34892648	34911187	Cdc25c	3.21831	2.40058	-0.422924
chr4	62053379	62069659	Cdc26	10.6395	17.7236	0.736243	chr4	62053379	62069659	Cdc26	8.57931	8.57639	-0.000491218
chr11	104363840	104411934	Cdc27	21.4059	16.0963	-0.411277	chr11	104363840	104411934	Cdc27	9.28951	10.5264	0.180334
chr10	79144939	79151143	Cdc34	78.3414	206.102	1.39551	chr10	79144939	79151143	Cdc34	77.7775	131.218	0.754538
chr9	20942984	20954350	Cdc37	50.1025	134.813	1.428	chr9	20942984	20954350	Cdc37	24.5731	24.7872	0.012515
chr19	29064841	29123219	Cdc37l1	18.0252	7.35166	-1.29387	chr19	29064841	29123219	Cdc37l1	13.4026	7.78635	-0.783496
chr10	40551426	40602949	Cdc40	7.81537	13.7333	0.813287	chr10	40551426	40602949	Cdc40	6.77416	7.5397	0.154465
chr4	136875610	136913674	Cdc42	81.4127	327.12	2.0065	chr4	136875610	136913674	Cdc42	45.4735	153.013	1.75056
chr1	181890890	182126151	Cdc42bpa	8.12288	9.24233	0.186265	chr1	181890890	182126151	Cdc42bpa	8.13265	8.70572	0.0982375
chr12	112531182	112615929	Cdc42bpb	26.166	16.8674	-0.633457	chr12	112531182	112615929	Cdc42bpb	54.9197	15.8279	-1.79486
chr19	6306456	6325652	Cdc42bpg	14.1602	6.33426	-1.16059	chr19	6306456	6325652	Cdc42bpg	40.0877	11.2697	-1.83071
chr15	78673076	78685959	Cdc42ep1	34.1516	55.0841	0.689686	chr15	78673076	78685959	Cdc42ep1	18.0344	24.1235	0.419688
chr17	79733064	79754431	Cdc42ep3	11.2782	5.16002	-1.12809	chr17	79733064	79754431	Cdc42ep3	8.144	13.3344	0.711347
chr11	113588163	113613129	Cdc42ep4	8.268	17.9067	1.11489	chr11	113588163	113613129	Cdc42ep4	4.81522	10.0132	1.05623
chr7	4102861	4116307	Cdc42ep5	14.7923	79.708	2.42988	chr7	4102861	4116307	Cdc42ep5	17.6794	38.9956	1.14125
chr3	94985689	95040346	Cdc42se1	19.3743	45.2308	1.22316	chr3	94985689	95040346	Cdc42se1	13.5545	16.1885	0.256202
chr11	54530916	54601205	Cdc42se2	16.189	32.9567	1.02556	chr11	54530916	54601205	Cdc42se2	10.9302	8.21507	-0.411972
chr16	18780539	18812065	Cdc45	18.6397	31.6074	0.76188	chr16	18780539	18812065	Cdc45	8.82721	6.99185	-0.336284
chr17	45528838	45570656	Cdc5l	21.0604	37.5851	0.835628	chr17	45528838	45570656	Cdc5l	14.0669	25.4052	0.852822
chr11	98769114	98785256	Cdc6	13.8066	13.229	-0.061651	chr11	98769114	98785256	Cdc6	6.35697	4.09498	-0.634482
chr5	107393340	107413458	Cdc7	37.1407	6.36865	-2.54394	chr5	107393340	107413458	Cdc7	23.1248	15.8553	-0.544474
chr1	145450405	145550023	Cdc73	4.58161	6.95127	0.601422	chr1	145450405	145550023	Cdc73	3.5835	3.32831	-0.10658
chr14	68294410	68333898	Cdca2	29.0538	16.6911	-0.799646	chr14	68294410	68333898	Cdca2	10.3148	7.83111	-0.397428
chr6	124780193	124783719	Cdca3	65.0614	101.829	0.646278	chr6	124780193	124783719	Cdca3	21.377	24.5714	0.200919
chr12	114058439	114067732	Cdca4	37.6394	71.2101	0.919841	chr12	114058439	114067732	Cdca4	7.64381	26.0996	1.77167
chr19	6085096	6091773	Cdca5	14.5638	26.3839	0.857266	chr19	6085096	6091773	Cdca5	3.60908	8.84048	1.29249
chr2	72314275	72324947	Cdca7	27.0931	34.9423	0.367051	chr2	72314275	72324947	Cdca7	16.8445	7.05029	-1.25652
chr12	119082333	119437516	Cdca7l	9.12989	13.9696	0.613623	chr12	119082333	119437516	Cdca7l	6.55239	6.99415	0.0941275
chr4	124595708	124614161	Cdca8	65.0469	98.0842	0.59254	chr4	124595708	124614161	Cdca8	23.2501	35.5288	0.611753
chr8	105155994	105309011	Cdh11	2.9949	5.94801	0.9899	chr8	105155994	105309011	Cdh11	2.74802	4.62281	0.75038
chr8	120807510	121848827	Cdh13	6.14429	16.6945	1.44205	chr8	120807510	121848827	Cdh13	12.0714	24.4829	1.02017
chr8	125372273	125391297	Cdh15	57.5468	79.5625	0.467353	chr8	125372273	125391297	Cdh15	51.8958	42.4124	-0.291131
chr18	16747385	16967755	Cdh2	17.4008	49.4643	1.50723	chr18	16747385	16967755	Cdh2	9.47108	68.529	2.85511
chr14	55250828	55260201	Cdh24	9.34008	1.94289	-2.26523	chr14	55250828	55260201	Cdh24	4.69054	2.22835	-1.07378
chr2	179177135	179634080	Cdh4	2.4377	0.62779	-1.95717	chr2	179177135	179634080	Cdh4	0.417425	1.00482	1.26735
chr8	106612815	106668402	Cdh5	5.71145	0.299958	-4.25103	chr8	106612815	106668402	Cdh5	0.639848	1.80943	1.49974
chr15	12958453	13103430	Cdh6	4.42605	1.0852	-2.02805	chr15	12958453	13103430	Cdh6	0.500415	1.55307	1.63393
chr7	148454983	148462685	Cdhr5	6.19473	0.961937	-2.68703	chr7	148454983	148462685	Cdhr5	11.017	3.85655	-1.51434
chr16	4726360	4790292	Cdip1	25.5555	10.4059	-1.29623	chr16	4726360	4790292	Cdip1	22.6654	11.4537	-0.984676
chr7	134119427	134124015	Cdipt	27.4508	47.6883	0.796786	chr7	134119427	134124015	Cdipt	19.956	23.3265	0.225149
chr10	68797895	68815660	Cdk1	33.9091	78.6482	1.21374	chr10	68797895	68815660	Cdk1	9.10471	27.7584	1.60824
chr8	125748740	125842476	Cdk10	40.2582	13.9471	-1.52931	chr8	125748740	125842476	Cdk10	74.359	29.7375	-1.32222
chr4	154998962	155024043	Cdk11b	92.0795	69.2853	-0.410331	chr4	154998962	155024043	Cdk11b	161.731	141.997	-0.187735
chr11	98064618	98114854	Cdk12	14.702	7.68437	-0.936011	chr11	98064618	98114854	Cdk12	10.0057	7.32405	-0.450115
chr13	17807795	17896931	Cdk13	11.6649	8.4481	-0.465479	chr13	17807795	17896931	Cdk13	9.64928	8.15953	-0.241936
chr5	4803383	5380251	Cdk14	4.67178	6.88718	0.559941	chr5	4803383	5380251	Cdk14	3.04004	7.25357	1.2546
chrX	20265079	20277005	Cdk16	64.3243	56.9276	-0.176236	chrX	20265079	20277005	Cdk16	57.1509	36.5911	-0.643285
chr10	92623620	92704087	Cdk17	18.3776	9.1503	-1.00606	chr10	92623620	92704087	Cdk17	19.4021	11.9562	-0.698456
chr1	134010123	134036262	Cdk18	13.5498	8.51512	-0.670173	chr1	134010123	134036262	Cdk18	6.57127	6.85938	0.0619063
chr10	40069113	40203624	Cdk19	5.85789	4.9184	-0.252194	chr10	40069113	40203624	Cdk19	3.4269	3.85516	0.169885
chr10	128134994	128142107	Cdk2	85.511	38.5676	-1.14872	chr10	128134994	128142107	Cdk2	48.6455	27.9339	-0.800291
chr13	64533860	64541029	Cdk20	6.14602	1.94785	-1.65777	chr13	64533860	64541029	Cdk20	8.31728	6.18252	-0.427917
chr5	124795447	124804637	Cdk2ap1	23.2714	134.905	2.53531	chr5	124795447	124804637	Cdk2ap1	24.4174	81.4163	1.73741
chr19	4097350	4099017	Cdk2ap2	48.8315	199.518	2.03063	chr19	4097350	4099017	Cdk2ap2	36.207	57.5503	0.668556
chr11	116077315	116081601	Cdk3	2.43653	0.571677	-2.09156	chr11	116077315	116081601	Cdk3	6.26867	5.50402	-0.187674
chr10	126500590	126504344	Cdk4	115.524	456.231	1.98157	chr10	126500590	126504344	Cdk4	91.2468	136.079	0.576596
chr5	23924045	23929382	Cdk5	25.3329	11.2654	-1.16911	chr5	23924045	23929382	Cdk5	34.0194	18.2175	-0.901034
chr11	80290524	80294686	Cdk5r1	15.0624	12.3567	-0.285655	chr11	80290524	80294686	Cdk5r1	6.3759	20.5468	1.68821
chr2	154161121	154198455	Cdk5rap1	3.86665	6.99106	0.854429	chr2	154161121	154198455	Cdk5rap1	6.7845	4.74207	-0.516726
chr4	69877888	70071469	Cdk5rap2	5.80421	3.89535	-0.575348	chr4	69877888	70071469	Cdk5rap2	5.65983	3.51422	-0.687554
chr11	96768738	96777828	Cdk5rap3	34.3257	16.7694	-1.03346	chr11	96768738	96777828	Cdk5rap3	23.5263	15.9398	-0.561638
chr5	3343892	3531005	Cdk6	19.3267	12.4075	-0.639388	chr5	3343892	3531005	Cdk6	8.85727	17.9328	1.01766
chr13	101439435	101500897	Cdk7	7.85275	7.87241	0.00360701	chr13	101439435	101500897	Cdk7	4.70642	5.88145	0.321541
chr5	147042825	147114450	Cdk8	45.3486	26.1778	-0.792715	chr5	147042825	147114450	Cdk8	66.7169	43.2882	-0.624078
chr2	32561301	32568304	Cdk9	42.292	39.2332	-0.108312	chr2	32561301	32568304	Cdk9	39.8538	33.0556	-0.269823
chr13	29283614	29947542	Cdkal1	15.2004	8.65312	-0.812821	chr13	29283614	29947542	Cdkal1	5.99724	7.68434	0.357622
chr5	92435099	92472068	Cdkl2	1.5858	1.23733	-0.357987	chr5	92435099	92472068	Cdkl2	2.49401	1.10131	-1.17924
chr11	51817722	51903280	Cdkl3	2.01676	1.27254	-0.664329	chr11	51817722	51903280	Cdkl3	2.42884	0.831418	-1.54662
chr17	29227923	29237667	Cdkn1a	326.352	430.189	0.398544	chr17	29227923	29237667	Cdkn1a	221.388	262.986	0.248412
chr6	134870418	134875543	Cdkn1b	36.1073	27.8558	-0.374315	chr6	134870418	134875543	Cdkn1b	9.16897	28.7568	1.64907
chr7	150644243	150646955	Cdkn1c	7.18949	8.9046	0.308662	chr7	150644243	150646955	Cdkn1c	1.3851	1.22962	-0.17178
chr4	88920376	88940523	Cdkn2a	3.90067	32.3556	3.05222	chr4	88920376	88940523	Cdkn2a	1.23784	12.9945	3.39201
chr8	48794697	48799285	Cdkn2aip	12.6953	6.17266	-1.04033	chr8	48794697	48799285	Cdkn2aip	6.43481	5.03725	-0.353261
chr11	51781132	51790838	Cdkn2aipnl	5.74495	13.1548	1.19522	chr11	51781132	51790838	Cdkn2aipnl	5.01398	6.16952	0.299202
chr4	88941083	89185312	Cdkn2b	5.05474	8.2911	0.713925	chr4	88941083	89185312	Cdkn2b	1.35103	2.48095	0.876837
chr4	109333480	109339361	Cdkn2c	29.8906	68.8465	1.20369	chr4	109333480	109339361	Cdkn2c	11.2868	45.0084	1.99555
chr9	123836859	123839607	Cdkn2d	3.69297	6.34694	0.781279	chr9	123836859	123839607	Cdkn2d	1.59411	0.396412	-2.00768
chr14	47380215	47391196	Cdkn3	4.48354	49.9263	3.47709	chr14	47380215	47391196	Cdkn3	2.97392	8.7826	1.56228
chr18	46872846	46888156	Cdo1	2.3899	0.653234	-1.87128	chr18	46872846	46888156	Cdo1	4.6409	3.49048	-0.410976
chr9	35259660	35315237	Cdon	115.563	62.0894	-0.896258	chr9	35259660	35315237	Cdon	83.4273	56.4405	-0.563789
chr15	85637401	85642127	Cdpf1	6.29817	25.3662	2.00991	chr15	85637401	85642127	Cdpf1	16.4916	17.9485	0.122127
chr7	128100549	128125826	Cdr2	9.10066	12.8774	0.500799	chr7	128100549	128125826	Cdr2	4.38472	6.91027	0.656257
chr11	115243229	115257446	Cdr2l	27.7761	8.80698	-1.65713	chr11	115243229	115257446	Cdr2l	18.2649	14.8866	-0.295059
chr2	132088883	132137786	Cds2	14.2217	11.3571	-0.324495	chr2	132088883	132137786	Cds2	5.95611	11.2395	0.916138
chr17	35680045	35694125	Cdsn	9.20378	1.96247	-2.22955	chr17	35680045	35694125	Cdsn	2.42747	5.05031	1.05692
chr8	125091914	125097030	Cdt1	65.4645	73.4488	0.166026	chr8	125091914	125097030	Cdt1	53.0995	22.7682	-1.22168
chr9	103255431	103268110	Cdv3	71.7176	120.832	0.752609	chr9	103255431	103268110	Cdv3	46.7717	76.6978	0.71355
chr13	35751730	35965933	Cdyl	15.1947	8.55637	-0.828496	chr13	35751730	35965933	Cdyl	6.87318	3.62527	-0.922889
chr8	119092623	119256891	Cdyl2	3.53845	0.852241	-2.05378	chr8	119092623	119256891	Cdyl2	0.295367	1.20567	2.02926
chr7	35904311	35906951	Cebpa	2.45813	10.591	2.10721	chr7	35904311	35906951	Cebpa	4.8843	2.66007	-0.876687
chr2	167514414	167515932	Cebpb	44.1803	56.6727	0.359253	chr2	167514414	167515932	Cebpb	24.0207	231.746	3.2702
chr16	15887378	16146944	Cebpd	1.70771	8.15182	2.25506	chr16	15887378	16146944	Cebpd	6.45306	10.819	0.745516
chr7	35831440	35841585	Cebpg	14.3421	13.8757	-0.0477002	chr7	35831440	35841585	Cebpg	8.19689	10.121	0.304209
chr17	79315838	79336410	Cebpz	18.9318	27.8608	0.557423	chr17	79315838	79336410	Cebpz	38.7315	43.2119	0.157921
chr17	79315838	79336410	Cebpzos	6.4968	15.5262	1.2569	chr17	79315838	79336410	Cebpzos	1.31455	9.60393	2.86905
chr6	120616331	120721209	Cecr2	4.63906	0.914734	-2.34241	chr6	120616331	120721209	Cecr2	2.62482	2.03997	-0.363666
chr15	100504852	100518351	Cela1	2.7417	0.490637	-2.48234	chr15	100504852	100518351	Cela1	0.242142	2.58787	3.41784
chr2	90780553	90859654	Celf1	57.971	35.4273	-0.710469	chr2	90780553	90859654	Celf1	34.9225	48.215	0.465325
chr2	6460743	7317825	Celf2	24.7884	50.1716	1.01721	chr2	6460743	7317825	Celf2	15.5273	79.8186	2.36192
chr18	25636120	25912658	Celf4	28.5664	15.4053	-0.890887	chr18	25636120	25912658	Celf4	21.6387	22.8303	0.0773409
chr10	80921971	80945454	Celf5	6.31946	0.878909	-2.84601	chr10	80921971	80945454	Celf5	7.99489	4.02647	-0.989562
chr19	21852829	21932850	Cemip2	4.01302	5.28695	0.397749	chr19	21852829	21932850	Cemip2	2.91899	6.56216	1.1687
chr5	30969258	30977210	Cenpa	130.214	204.373	0.650314	chr5	30969258	30977210	Cenpa	41.1845	55.0955	0.419834
chr2	131003024	131005803	Cenpb	55.0159	125.871	1.19402	chr2	131003024	131005803	Cenpb	74.9353	118.115	0.656471
chr5	86441049	86494608	Cenpc1	10.6205	11.0572	0.0581393	chr5	86441049	86494608	Cenpc1	10.3412	5.09296	-1.02182
chr3	134875526	134936504	Cenpe	11.0982	16.2681	0.551723	chr3	134875526	134936504	Cenpe	5.09769	9.82135	0.946077
chr1	191464492	191511965	Cenpf	10.8545	15.492	0.513225	chr1	191464492	191511965	Cenpf	5.74087	7.17259	0.321225
chr13	101529628	101545854	Cenph	21.2626	31.854	0.583156	chr13	101529628	101545854	Cenph	17.6566	10.9083	-0.694776
chrX	130842622	130897643	Cenpi	16.8279	9.25334	-0.862805	chrX	130842622	130897643	Cenpi	8.40593	4.73694	-0.827451
chr14	57145597	57190683	Cenpj	5.49468	4.4518	-0.303647	chr14	57145597	57190683	Cenpj	9.14231	5.27769	-0.792652
chr13	104995201	105039702	Cenpk	2.06632	17.876	3.11289	chr13	104995201	105039702	Cenpk	2.1585	3.73266	0.790173
chr1	163000897	163016856	Cenpl	12.2136	10.1378	-0.26874	chr1	163000897	163016856	Cenpl	5.95111	9.14419	0.619696
chr15	82064205	82075177	Cenpm	23.0861	37.7045	0.707713	chr15	82064205	82075177	Cenpm	4.12548	10.3278	1.3239
chr8	119445639	119465403	Cenpn	16.6336	21.9401	0.399472	chr8	119445639	119465403	Cenpn	12.5796	12.3116	-0.0310613
chr12	4133396	4233965	Cenpo	4.57457	5.50017	0.265843	chr12	4133396	4233965	Cenpo	2.86962	3.9842	0.473431
chr13	49559427	49748100	Cenpp	4.06786	17.5873	2.11219	chr13	49559427	49748100	Cenpp	1.42773	0.500557	-1.51212
chr17	41057757	41071523	Cenpq	5.35632	10.9833	1.036	chr17	41057757	41071523	Cenpq	1.35084	4.13102	1.61264
chr4	148502457	148511709	Cenps	20.6689	32.3403	0.645873	chr4	148502457	148511709	Cenps	4.73242	3.53417	-0.421207
chr8	108368577	108375908	Cenpt	42.0062	31.8976	-0.397156	chr8	108368577	108375908	Cenpt	93.4335	44.4257	-1.07255
chr8	47637422	47702581	Cenpu	9.15358	3.00983	-1.60466	chr8	47637422	47702581	Cenpu	2.3728	2.15532	-0.138686
chr11	62338445	62352763	Cenpv	8.45245	26.2508	1.63492	chr11	62338445	62352763	Cenpv	3.50473	5.12756	0.548967
chr10	29915814	29920346	Cenpw	6.08687	17.873	1.55401	chr10	29915814	29920346	Cenpw	1.00576	5.1331	2.35155
chr11	120572254	120575122	Cenpx	21.2756	110.743	2.37994	chr11	120572254	120575122	Cenpx	19.8186	45.4572	1.19765
chr4	153349669	153381334	Cep104	4.99862	6.22214	0.315879	chr4	153349669	153381334	Cep104	5.30435	2.4356	-1.1229
chr11	108286579	108721929	Cep112	4.24778	2.87686	-0.562216	chr11	108286579	108721929	Cep112	3.08286	0.526381	-2.55009
chr18	53807804	53904262	Cep120	17.5421	4.04835	-2.11541	chr18	53807804	53904262	Cep120	8.81087	6.90496	-0.351651
chr9	8076631	8134446	Cep126	4.61001	0.701819	-2.7156	chr9	8076631	8134446	Cep126	4.51256	1.32648	-1.76635
chr11	119925743	119948141	Cep131	7.9151	5.14991	-0.620062	chr11	119925743	119948141	Cep131	8.18018	3.75734	-1.12242
chr5	77017723	77075491	Cep135	4.36783	2.44008	-0.839989	chr5	77017723	77075491	Cep135	2.30659	2.25427	-0.0331007
chr2	125388823	125450849	Cep152	10.8111	2.20542	-2.29338	chr2	125388823	125450849	Cep152	8.14621	2.56427	-1.66758
chr9	87086797	87150367	Cep162	4.16494	1.89196	-1.13841	chr9	87086797	87150367	Cep162	6.20915	4.79952	-0.371506
chr9	45575028	45636746	Cep164	8.66389	5.14698	-0.75129	chr9	45575028	45636746	Cep164	10.0344	6.88991	-0.542391
chr1	178663783	178744084	Cep170	17.2937	13.7381	-0.332062	chr1	178663783	178744084	Cep170	8.44097	12.3017	0.543377
chr12	113960384	113984802	Cep170b	21.1702	21.891	0.0483019	chr12	113960384	113984802	Cep170b	40.1783	18.3809	-1.12821
chr16	32099874	32108154	Cep19	2.14897	9.67134	2.17007	chr16	32099874	32108154	Cep19	2.62132	3.44927	0.395996
chr18	67959760	68044824	Cep192	7.8465	6.31663	-0.312895	chr18	67959760	68044824	Cep192	9.39661	6.17704	-0.605225
chr2	155782293	155824636	Cep250	14.6625	5.14147	-1.51188	chr2	155782293	155824636	Cep250	20.0471	6.66153	-1.58947
chr10	99950215	100051893	Cep290	2.22156	1.48928	-0.57696	chr10	99950215	100051893	Cep290	2.52101	1.43253	-0.815436
chr9	15087780	15162232	Cep295	6.15735	3.43765	-0.840888	chr9	15087780	15162232	Cep295	8.48341	5.34441	-0.666612
chr11	118162374	118216725	Cep295nl	0.689221	1.05988	0.620869	chr11	118162374	118216725	Cep295nl	2.65226	0.590321	-2.16765
chr1	157692093	157820385	Cep350	3.28693	2.76126	-0.251414	chr1	157692093	157820385	Cep350	2.73582	2.83171	0.0497007
chr6	30603456	30643749	Cep41	5.56397	5.5931	0.00753439	chr6	30603456	30643749	Cep41	2.6448	2.93428	0.14985
chr8	59010318	59029363	Cep44	10.3662	11.8178	0.189073	chr8	59010318	59029363	Cep44	11.9769	10.0641	-0.251036
chr19	38129473	38148915	Cep55	34.4348	28.4792	-0.273957	chr19	38129473	38148915	Cep55	12.6086	12.5644	-0.00506632
chr9	13553622	13631551	Cep57	13.643	10.7517	-0.343591	chr9	13553622	13631551	Cep57	11.147	9.54079	-0.224472
chr10	41438645	41529674	Cep57l1	14.4131	8.16199	-0.820386	chr10	41438645	41529674	Cep57l1	8.27109	4.62408	-0.838912
chr9	102488907	102528454	Cep63	19.5022	8.97366	-1.11987	chr9	102488907	102528454	Cep63	15.8768	8.77119	-0.856079
chr11	20127039	20149427	Cep68	12.3883	5.99372	-1.04745	chr11	20127039	20149427	Cep68	8.25962	5.79565	-0.511104
chr9	99143759	99205148	Cep70	5.43857	2.45512	-1.14743	chr9	99143759	99205148	Cep70	2.16292	1.08379	-0.996895
chr13	74173942	74199733	Cep72	3.53548	0.961643	-1.87833	chr13	74173942	74199733	Cep72	1.29162	0.610523	-1.08107
chr18	67776617	67801009	Cep76	3.6202	6.74554	0.897867	chr18	67776617	67801009	Cep76	2.91512	3.35704	0.203633
chr19	16030262	16059479	Cep78	12.402	7.61688	-0.703302	chr19	16030262	16059479	Cep78	10.7287	4.28074	-1.32554
chr10	94151534	94253081	Cep83	15.4417	9.53546	-0.69546	chr10	94151534	94253081	Cep83	18.2864	12.8493	-0.509084
chr4	133685772	133743000	Cep85	20.6397	8.50569	-1.27892	chr4	133685772	133743000	Cep85	11.328	5.66101	-1.00076
chr10	52993248	53099689	Cep85l	2.44739	0.853155	-1.52036	chr10	52993248	53099689	Cep85l	2.08613	1.70127	-0.294211
chr7	36182081	36224849	Cep89	11.6525	8.51635	-0.452332	chr7	36182081	36224849	Cep89	11.7338	3.75209	-1.6449
chr11	106650565	106680175	Cep95	12.7052	3.8193	-1.73404	chr11	106650565	106680175	Cep95	20.8465	9.23973	-1.17388
chr16	55900000	55934961	Cep97	10.3557	2.84751	-1.86265	chr16	55900000	55934961	Cep97	6.16609	6.83016	0.147564
chr3	106284903	106378259	Cept1	13.5872	15.0274	0.145346	chr3	106284903	106378259	Cept1	15.0657	12.4271	-0.277782
chr2	29725013	29738360	Cercam	15.8066	5.10138	-1.63157	chr2	29725013	29738360	Cercam	14.199	9.54959	-0.572283
chr15	85969530	86017626	Cerk	12.95	6.80531	-0.928218	chr15	85969530	86017626	Cerk	18.3661	9.40571	-0.965438
chr17	25707755	25711988	Cerox1	3.77491	6.3746	0.755894	chr17	25707755	25711988	Cerox1	5.41498	3.61467	-0.583091
chr3	95119111	95161124	Cers2	76.75	95.1197	0.309576	chr3	95119111	95161124	Cers2	159.293	81.535	-0.966195
chr8	4493404	4526079	Cers4	11.5713	4.02511	-1.52345	chr8	4493404	4526079	Cers4	8.57415	8.56823	-0.000996289
chr15	99566022	99602946	Cers5	32.8373	31.814	-0.045675	chr15	99566022	99602946	Cers5	50.6443	24.6302	-1.03997
chr2	68699497	68952340	Cers6	6.76186	4.17792	-0.694635	chr2	68699497	68952340	Cers6	3.06	3.86568	0.33719
chr8	107450159	107458572	Ces2e	1.84719	2.12816	0.204275	chr8	107450159	107458572	Ces2e	8.99571	10.9199	0.279647
chr8	107485617	107493437	Ces2g	4.61327	2.36831	-0.961928	chr8	107485617	107493437	Ces2g	25.3662	10.4412	-1.28062
chrX	70158903	70163683	Cetn2	6.67383	35.1559	2.39718	chrX	70158903	70163683	Cetn2	3.15395	11.6282	1.88239
chr13	81922245	81936153	Cetn3	31.6198	131.315	2.05413	chr13	81922245	81936153	Cetn3	18.8446	58.4402	1.63281
chr3	37207548	37211368	Cetn4	3.33388	5.43492	0.705056	chr3	37207548	37211368	Cetn4	0.730066	3.47421	2.25058
chr8	97944149	97958769	Cfap20	36.301	50.117	0.46529	chr8	97944149	97958769	Cfap20	18.9835	18.5979	-0.0296125
chr16	90926055	90935094	Cfap298	7.08116	36.4404	2.36348	chr16	90926055	90935094	Cfap298	6.71877	5.75699	-0.222881
chr9	8021671	8042875	Cfap300	0.756892	3.02149	1.9971	chr9	8021671	8042875	Cfap300	2.60237	1.73045	-0.588683
chr11	29121535	29147272	Cfap36	7.54452	18.7393	1.31257	chr11	29121535	29147272	Cfap36	6.92493	13.0551	0.914747
chr10	77441394	77448183	Cfap410	15.6085	6.92687	-1.17205	chr10	77441394	77448183	Cfap410	13.707	7.8628	-0.801793
chr5	5580981	5664232	Cfap69	4.50706	0.605085	-2.89698	chr5	5580981	5664232	Cfap69	4.072	4.02555	-0.0165502
chr8	47249004	47280944	Cfap97	7.48809	6.73181	-0.153603	chr8	47249004	47280944	Cfap97	3.16703	3.37261	0.0907334
chr8	114290581	114378237	Cfdp1	8.12946	48.104	2.56492	chr8	114290581	114378237	Cfdp1	5.67209	20.6291	1.86273
chr1	141982431	142079988	Cfh	1.06354	0.32376	-1.71587	chr1	141982431	142079988	Cfh	0.798193	2.8339	1.82798
chr19	5490454	5494031	Cfl1	432.337	3145.11	2.86288	chr19	5490454	5494031	Cfl1	147.311	1076.58	2.86951
chr12	55959805	55963864	Cfl2	40.9803	76.9611	0.9092	chr12	55959805	55963864	Cfl2	17.7594	28.2722	0.670799
chr1	58768334	58815726	Cflar	22.9276	24.1585	0.0754458	chr1	58768334	58815726	Cflar	40.7979	95.1498	1.22171
chrX	20502579	20508681	Cfp	10.7347	2.10106	-2.35309	chrX	20502579	20508681	Cfp	34.6675	15.6966	-1.14314
chr9	78278324	78291044	Cgas	9.2783	3.41448	-1.4422	chr9	78278324	78291044	Cgas	5.10022	6.97795	0.452243
chr16	64851826	64859317	Cggbp1	7.98969	24.2984	1.60465	chr16	64851826	64859317	Cggbp1	8.16233	9.12835	0.161373
chr9	71474313	71619409	Cgnl1	9.22088	9.35064	0.0201618	chr9	71474313	71619409	Cgnl1	11.4277	4.74604	-1.26774
chr5	31235515	31247853	Cgref1	14.4136	17.1421	0.250112	chr5	31235515	31247853	Cgref1	15.7862	16.8082	0.0904998
chr14	47451808	47473873	Cgrrf1	27.0845	36.0794	0.413708	chr14	47451808	47473873	Cgrrf1	16.8747	23.4876	0.477031
chr19	34548273	34549638	Ch25h	2.62958	0.852628	-1.62484	chr19	34548273	34549638	Ch25h	1.95242	3.26585	0.742194
chr2	119176977	119180062	Chac1	27.745	32.3547	0.221747	chr2	119176977	119180062	Chac1	12.1254	13.2214	0.124843
chr11	30854397	31002704	Chac2	8.3453	13.0067	0.640215	chr11	30854397	31002704	Chac2	3.23849	6.97693	1.10727
chr17	56179838	56207449	Chaf1a	34.9992	34.3434	-0.0272893	chr17	56179838	56207449	Chaf1a	18.763	20.4839	0.126604
chr16	93884145	93906351	Chaf1b	15.0134	34.614	1.20511	chr16	93884145	93906351	Chaf1b	12.5112	9.89731	-0.338109
chr8	13869640	13881639	Champ1	13.5118	17.1184	0.341332	chr8	13869640	13881639	Champ1	14.8359	13.1638	-0.172518
chr14	21521233	21523647	Chchd1	23.3694	202.932	3.11831	chr14	21521233	21523647	Chchd1	29.4494	75.9631	1.36706
chr10	75395874	75403417	Chchd10	0.56881	11.645	4.35562	chr10	75395874	75403417	Chchd10	0.859519	5.38885	2.64838
chr5	130357031	130363340	Chchd2	117.565	554.037	2.23652	chr5	130357031	130363340	Chchd2	35.6344	145.854	2.03318
chr6	32742206	33010260	Chchd3	19.5626	89.203	2.189	chr6	32742206	33010260	Chchd3	14.0055	25.2496	0.850262
chr6	91414269	91423417	Chchd4	8.35252	51.2199	2.61642	chr6	91414269	91423417	Chchd4	12.0557	24.7608	1.03835
chr2	128955435	128959847	Chchd5	7.80132	22.4873	1.52732	chr2	128955435	128959847	Chchd5	12.531	15.5788	0.314083
chr6	89333139	89545646	Chchd6	6.09455	35.199	2.52994	chr6	89333139	89545646	Chchd6	5.34849	7.36151	0.460869
chr4	3866034	3878529	Chchd7	8.44524	48.375	2.51805	chr4	3866034	3878529	Chchd7	23.2367	18.1567	-0.355901
chr17	15841930	15909576	Chd1	15.366	11.2282	-0.452613	chr17	15841930	15909576	Chd1	13.5564	7.84788	-0.788596
chr3	97364670	97414113	Chd1l	6.92341	6.29065	-0.138274	chr3	97364670	97414113	Chd1l	5.26633	2.60978	-1.01287
chr7	80571537	80703281	Chd2	14.5934	5.6762	-1.36232	chr7	80571537	80703281	Chd2	15.9019	12.6213	-0.333338
chr11	69156774	69182928	Chd3	12.919	6.1716	-1.06578	chr11	69156774	69182928	Chd3	6.42304	7.49501	0.222674
chr6	125045998	125080609	Chd4	74.5069	81.6932	0.132841	chr6	125045998	125080609	Chd4	69.7085	68.8937	-0.0169618
chr2	160772713	160934822	Chd6	8.92271	3.05775	-1.54501	chr2	160772713	160934822	Chd6	18.248	8.81239	-1.05013
chr4	8617552	8795596	Chd7	30.0607	12.2358	-1.29677	chr4	8617552	8795596	Chd7	29.5356	48.3356	0.710628
chr14	52817825	52877435	Chd8	20.6765	15.5307	-0.412867	chr14	52817825	52877435	Chd8	30.6991	34.8927	0.184731
chr8	93352733	93578407	Chd9	3.5432	1.67458	-1.08125	chr8	93352733	93578407	Chd9	8.66006	3.61996	-1.2584
chr9	36516066	36534243	Chek1	13.2898	12.4285	-0.0966761	chr9	36516066	36534243	Chek1	10.7065	11.6952	0.127432
chr5	111269001	111303159	Chek2	8.30756	9.33481	0.168195	chr5	111269001	111303159	Chek2	10.9395	9.73499	-0.168292
chr8	74967778	74999132	Cherp	49.6936	34.1907	-0.539457	chr8	74967778	74999132	Cherp	63.4367	32.9263	-0.946077
chr5	110564848	110605523	Chfr	15.1843	8.07779	-0.910546	chr5	110564848	110605523	Chfr	19.2996	10.9197	-0.821645
chrX	100551814	100591457	Chic1	1.61836	0.620529	-1.38296	chrX	100551814	100591457	Chic1	1.2645	1.23185	-0.0377457
chr5	75401028	75440666	Chic2	4.94595	19.7871	2.00024	chr5	75401028	75440666	Chic2	4.89675	8.08406	0.723254
chr7	148661134	148725727	Chid1	6.20164	8.52776	0.459518	chr7	148661134	148725727	Chid1	3.82593	4.22552	0.143318
chr19	3851772	3894369	Chka	161.826	20.6109	-2.97297	chr19	3851772	3894369	Chka	127.909	97.4075	-0.393012
chr15	89246835	89260358	Chkb	80.2392	14.3413	-2.48413	chr15	89246835	89260358	Chkb	88.5742	34.1912	-1.37326
chrX	110154200	110299124	Chm	5.62986	6.27653	0.156868	chrX	110154200	110299124	Chm	3.34068	7.17093	1.10202
chr1	177592552	177622763	Chml	5.63921	6.34313	0.169702	chr1	177592552	177622763	Chml	1.65031	1.68027	0.0259524
chr8	125728160	125736688	Chmp1a	50.9172	42.6007	-0.257275	chr8	125728160	125736688	Chmp1a	32.7738	21.532	-0.606064
chr18	67247951	67405484	Chmp1b	8.10103	18.0998	1.1598	chr18	67247951	67405484	Chmp1b	3.90662	12.3325	1.65847
chr7	13617354	13620126	Chmp2a	70.8713	105.844	0.578671	chr7	13617354	13620126	Chmp2a	66.1905	74.8732	0.177826
chr16	65539373	65563007	Chmp2b	6.32916	29.1589	2.20385	chr16	65539373	65563007	Chmp2b	5.95034	11.0326	0.890734
chr6	71493845	71532603	Chmp3	21.9459	42.0034	0.936552	chr6	71493845	71532603	Chmp3	20.3202	26.3597	0.375421
chr2	154482761	154520519	Chmp4b	25.5361	133.087	2.38176	chr2	154482761	154520519	Chmp4b	24.0594	43.3848	0.850588
chr4	40895585	40912335	Chmp5	26.3338	59.361	1.1726	chr4	40895585	40912335	Chmp5	16.5856	23.2716	0.488644
chr11	119464218	119790231	Chmp6	19.9057	36.8836	0.8898	chr11	119464218	119790231	Chmp6	12.5542	10.9749	-0.193957
chr14	70116785	70132377	Chmp7	17.7541	21.1738	0.254135	chr14	70116785	70132377	Chmp7	21.9822	17.8805	-0.297948
chr2	73434582	73613403	Chn1	5.32367	14.5111	1.44666	chr2	73434582	73613403	Chn1	6.09521	9.20297	0.594422
chr2	73434582	73613403	Chn1os3	2.20789	0.282173	-2.96801	chr2	73434582	73613403	Chn1os3	1.0473	0.750808	-0.480153
chr9	18096710	18118444	Chordc1	59.1258	53.8715	-0.134264	chr9	18096710	18118444	Chordc1	48.2576	35.9654	-0.424146
chr2	119373442	119412758	Chp1	14.8155	41.2084	1.47584	chr2	119373442	119412758	Chp1	7.44937	21.4083	1.52298
chr1	75471143	75476046	Chpf	20.9182	29.0355	0.473059	chr1	75471143	75476046	Chpf	18.9357	15.958	-0.246833
chr5	24092561	24107820	Chpf2	28.6989	16.9337	-0.761093	chr5	24092561	24107820	Chpf2	29.0059	13.7219	-1.07987
chr10	87922331	87966715	Chpt1	7.27127	14.7685	1.02224	chr10	87922331	87966715	Chpt1	4.85829	9.80835	1.01356
chr15	72920841	72924505	Chrac1	9.32943	59.8985	2.68266	chr15	72920841	72924505	Chrac1	15.9481	27.245	0.772609
chr16	20724526	20742457	Chrd	3.21783	0.420834	-2.93476	chr16	20724526	20742457	Chrd	2.29174	0.203456	-3.49366
chr7	107154913	107183236	Chrdl2	2.47086	2.59971	0.0733355	chr7	107154913	107183236	Chrdl2	1.60211	1.15446	-0.472755
chr2	91762345	91772454	Chrm4	4.56821	0.205169	-4.47674	chr2	91762345	91772454	Chrm4	0.184038	1.29819	2.81842
chr2	73401337	73418395	Chrna1	101.628	342.775	1.75396	chr2	73401337	73418395	Chrna1	64.9586	121.285	0.900804
chr2	73422916	73427265	Chrna1os	1.27038	5.86745	2.20748	chr2	73422916	73427265	Chrna1os	1.34943	6.31348	2.22609
chr11	69597537	69609439	Chrnb1	167.193	105.57	-0.663315	chr11	69597537	69609439	Chrnb1	313.737	170.216	-0.882191
chr1	89087171	89096645	Chrnd	30.9108	29.0157	-0.0912762	chr1	89087171	89096645	Chrnd	12.3133	10.3962	-0.244163
chr1	89102385	89108410	Chrng	71.1258	39.8698	-0.835077	chr1	89102385	89108410	Chrng	18.283	11.8063	-0.630949
chr2	92439863	92455409	Chst1	7.14147	0.408736	-4.12698	chr2	92439863	92455409	Chst1	1.38466	1.74613	0.33463
chr10	82448241	82658636	Chst11	6.13794	10.7377	0.806853	chr10	82448241	82658636	Chst11	6.13533	8.24203	0.42586
chr5	140981562	141001192	Chst12	4.2706	11.6383	1.44637	chr5	140981562	141001192	Chst12	3.01468	3.44717	0.193409
chr6	90258344	90275179	Chst13	1.50003	0.243928	-2.62047	chr6	90258344	90275179	Chst13	0.240393	1.01622	2.07974
chr2	118752232	118754319	Chst14	7.11776	26.4573	1.89417	chr2	118752232	118754319	Chst14	9.15824	13.8489	0.596634
chr7	139427462	139509974	Chst15	5.06553	1.80113	-1.49181	chr7	139427462	139509974	Chst15	1.77858	2.4638	0.470165
chr9	95301344	95307689	Chst2	2.81706	7.2896	1.37165	chr9	95301344	95307689	Chst2	2.27994	4.86103	1.09227
chrX	19636695	19674646	Chst7	2.66878	4.30786	0.69079	chrX	19636695	19674646	Chst7	1.60642	5.23882	1.7054
chr7	35459486	35597730	Chst8	1.74394	2.69743	0.629239	chr7	35459486	35597730	Chst8	2.23838	0.950385	-1.23587
chr7	73254377	73318684	Chsy1	10.3369	12.1309	0.230875	chr7	73254377	73318684	Chsy1	4.03706	9.06615	1.16718
chr17	25854116	25864360	Chtf18	19.9369	15.3624	-0.376042	chr17	25854116	25864360	Chtf18	15.8157	8.02628	-0.978555
chr8	109407762	109417493	Chtf8	40.0194	71.7965	0.843215	chr8	109407762	109417493	Chtf8	19.037	18.4973	-0.0414889
chr3	90302460	90313420	Chtop	105.478	102.489	-0.0414692	chr3	90302460	90313420	Chtop	79.7176	76.2702	-0.06378
chr19	44147823	44181967	Chuk	29.6995	12.7149	-1.22392	chr19	44147823	44181967	Chuk	36.9663	26.0595	-0.504403
chr12	77866524	77884165	Churc1	24.2999	80.582	1.72951	chr12	77866524	77884165	Churc1	7.00065	22.9174	1.71088
chr2	127066673	127073552	Ciao1	6.57291	15.3526	1.22388	chr2	127066673	127073552	Ciao1	7.39236	13.5242	0.871432
chr9	65974417	65986775	Ciao2a	26.7952	76.4246	1.51206	chr9	65974417	65986775	Ciao2a	11.5016	33.2329	1.53078
chr8	107163738	107165628	Ciao2b	53.5502	193.633	1.85436	chr8	107163738	107165628	Ciao2b	38.403	73.0077	0.92683
chr17	25910720	25922531	Ciao3	26.0849	12.7972	-1.02739	chr17	25910720	25922531	Ciao3	26.283	7.39468	-1.82957
chr8	97343718	97362240	Ciapin1	30.633	26.1354	-0.229082	chr8	97343718	97362240	Ciapin1	19.0804	19.7824	0.0521255
[truncated: 9,641 more rows]

## Sheet: SC targets with nuc enrich
Supplementary Table S4. Analysis of YTHDC1 mRNA nuclear export in ASC and C2C12 myoblasts
Cyto/Nuc ratio of mRNAs with altered nuclear export in YTHDC1 iKO vs. Ctrl ASC.
Ctrl							iKO
chr	start	end	gene	nuc FPKM	cyto FPKM	log2(cyto/nuc)	chr	start	end	gene	nuc FPKM	cyto FPKM	log2(cyto/nuc)
chr2	26301443	26359342	0610009E02Rik	15.9409	13.106	-0.282506	chr2	26301443	26359342	0610009E02Rik	22.1161	0.469596	-5.55753
chr11	23464948	23533631	0610010F05Rik	5.41042	5.34263	-0.0181907	chr11	23464948	23533631	0610010F05Rik	9.22222	4.23154	-1.12393
chr4	124479792	124527974	1110065P20Rik	10.1291	61.653	2.60567	chr4	124479792	124527974	1110065P20Rik	28.7943	6.0356	-2.25421
chr2	154370140	154384589	1700003F12Rik	1.00581	0.801886	-0.326884	chr2	154370140	154384589	1700003F12Rik	1.92412	0.410122	-2.23007
chr7	134653951	134704733	1700008J07Rik	4.36454	2.31326	-0.9159	chr7	134653951	134704733	1700008J07Rik	2.45041	0.7038	-1.79978
chr11	112905219	113063152	2610035D17Rik	0.938549	1.79526	0.935685	chr11	112905219	113063152	2610035D17Rik	1.65154	0.383127	-2.10792
chr7	35021732	35070628	4931406P16Rik	6.96879	8.18102	0.231373	chr7	35021732	35070628	4931406P16Rik	19.4029	8.5684	-1.17918
chr5	137395015	137412979	4933404O12Rik	2.45615	2.85159	0.215372	chr5	137395015	137412979	4933404O12Rik	1.07347	0.442837	-1.27744
chr5	138700885	138714040	6330418K02Rik	4.36797	3.44371	-0.342998	chr5	138700885	138714040	6330418K02Rik	1.56144	0.404739	-1.94781
chr17	41012430	41017507	9130008F23Rik	3.73531	1.43391	-1.38128	chr17	41012430	41017507	9130008F23Rik	4.79949	1.71669	-1.48325
chr9	22215954	22249129	9530077C05Rik	1.7609	1.59478	-0.142955	chr9	22215954	22249129	9530077C05Rik	10.2611	3.41828	-1.58584
chrX	20528790	20564475	A230072C01Rik	3.12564	1.11676	-1.48483	chrX	20528790	20564475	A230072C01Rik	2.4611	0.664225	-1.88956
chr5	139064086	139090054	A430033K04Rik	3.40135	2.16089	-0.654487	chr5	139064086	139090054	A430033K04Rik	3.83671	1.90839	-1.00751
chr19	4423471	4477143	A930001C03Rik	9.34597	3.17967	-1.55547	chr19	4423471	4477143	A930001C03Rik	7.42895	1.62863	-2.1895
chr10	68671299	68754532	A930033H14Rik	9.82904	2.64832	-1.89197	chr10	68671299	68754532	A930033H14Rik	5.43607	1.21082	-2.16659
chr4	126420993	126645167	AU040320	10.5951	7.13141	-0.571141	chr4	126420993	126645167	AU040320	10.527	4.47877	-1.23292
chr7	48734243	48755260	AW146154	2.24619	1.29576	-0.793678	chr7	48734243	48755260	AW146154	2.39718	1.16085	-1.04616
chr9	39394980	39411855	AW551984	1.19262	1.70615	0.516619	chr9	39394980	39411855	AW551984	1.57531	0.676002	-1.22053
chr2	156373311	156394708	Aar2	5.07904	10.793	1.08746	chr2	156373311	156394708	Aar2	5.46733	2.55306	-1.09861
chr17	45643780	45657792	Aars2	14.6254	10.3131	-0.503993	chr17	45643780	45657792	Aars2	27.2435	13.6103	-1.00121
chr17	24488967	24551458	Abca3	1.89293	1.24855	-0.600368	chr17	24488967	24551458	Abca3	2.53435	0.454129	-2.48044
chr17	46434431	46464972	Abcc10	5.06364	1.18557	-2.0946	chr17	46434431	46464972	Abcc10	17.6777	3.17765	-2.4759
chrX	70931516	70983873	Abcd1	6.31186	3.63148	-0.797506	chrX	70931516	70983873	Abcd1	6.1569	2.5339	-1.28084
chr12	85943480	85958416	Abcd4	31.4121	15.3815	-1.03013	chr12	85943480	85958416	Abcd4	52.8503	24.3487	-1.11806
chr9	106350970	106355249	Abhd14b	5.29425	3.19645	-0.727954	chr9	106350970	106355249	Abhd14b	8.17976	2.31998	-1.81795
chr11	76230233	76391241	Abr	27.5695	16.1613	-0.770532	chr11	76230233	76391241	Abr	29.5478	12.5536	-1.23495
chr2	103406466	103558580	Abtb2	2.297	1.61851	-0.505088	chr2	103406466	103558580	Abtb2	4.56521	1.52318	-1.58359
chr4	155265983	155281360	Acap3	17.4276	10.0379	-0.795917	chr4	155265983	155281360	Acap3	24.8598	10.5061	-1.24259
chr9	54452803	54509692	Acsbg1	2.88137	1.87894	-0.616834	chr9	54452803	54509692	Acsbg1	9.82826	1.21623	-3.01452
chr2	155343778	155388479	Acss2	1.17813	1.22633	0.0578454	chr2	155343778	155388479	Acss2	2.00273	0.319752	-2.64694
chr5	25265790	25356509	Actr3b	1.75704	1.72478	-0.0267421	chr5	25265790	25356509	Actr3b	1.1421	0.564428	-1.01682
chr2	48669628	49172589	Acvr2a	8.93897	4.81632	-0.892177	chr2	48669628	49172589	Acvr2a	4.75694	1.77657	-1.42094
chr2	163552306	163575975	Ada	5.98797	7.67028	0.357212	chr2	163552306	163575975	Ada	4.57526	0.984108	-2.21696
chr12	82459839	82633898	Adam4	1.99194	0.472194	-2.07672	chr12	82459839	82633898	Adam4	2.68693	0.52202	-2.36378
chr9	90057815	90094940	Adamts7	13.4555	6.5325	-1.04249	chr9	90057815	90094940	Adamts7	18.9971	8.91444	-1.09156
chr10	13243647	13283182	Adat2	1.17386	6.52695	2.47514	chr10	13243647	13283182	Adat2	3.60583	1.18356	-1.6072
chr10	80065624	80078528	Adat3	21.2033	8.91415	-1.25012	chr10	80065624	80078528	Adat3	10.6821	3.14655	-1.76336
chr15	76406788	76438021	Adck5	22.1068	11.7772	-0.908493	chr15	76406788	76438021	Adck5	30.1578	13.271	-1.18425
chr18	80323873	80348221	Adnp2	7.48656	6.07919	-0.300423	chr18	80323873	80348221	Adnp2	9.38412	2.86604	-1.71116
chr4	125993594	125998947	Adprhl2	36.3722	24.0574	-0.596354	chr4	125993594	125998947	Adprhl2	43.3578	7.61765	-2.50887
chr7	86040812	86056095	Aen	40.418	22.6009	-0.838616	chr7	86040812	86056095	Aen	120.734	46.462	-1.37771
chr18	61889915	61946316	Afap1l1	3.33014	2.11256	-0.65659	chr18	61889915	61946316	Afap1l1	4.23518	1.62436	-1.38255
chr11	117676832	117701222	Afmid	6.35266	3.53087	-0.847336	chr11	117676832	117701222	Afmid	14.034	5.8903	-1.25251
chr5	31191224	31210161	Agbl5	5.64161	3.89184	-0.535653	chr5	31191224	31210161	Agbl5	7.17414	3.52835	-1.02381
chr4	126017921	126106786	Ago3	1.03573	0.401777	-1.36619	chr4	126017921	126106786	Ago3	2.07892	0.250495	-3.05298
chr17	34742805	34752916	Agpat1	60.9584	59.1118	-0.0443779	chr17	34742805	34752916	Agpat1	71.4139	34.4318	-1.05246
chr13	59550895	59658708	Agtpbp1	8.20397	4.34142	-0.918154	chr13	59550895	59658708	Agtpbp1	12.4721	5.12772	-1.28231
chr4	132567420	132634025	Ahdc1	28.2967	16.4623	-0.781467	chr4	132567420	132634025	Ahdc1	76.0922	30.4041	-1.32349
chr19	9063773	9151416	Ahnak	83.4814	57.0384	-0.549522	chr19	9063773	9151416	Ahnak	94.8683	45.7912	-1.05086
chr11	23206894	23398039	Ahsa2	36.1325	36.393	0.0103628	chr11	23206894	23398039	Ahsa2	19.9522	8.81695	-1.1782
chr14	55186305	55196498	Ajuba	68.665	37.9038	-0.857232	chr14	55186305	55196498	Ajuba	101.257	49.3568	-1.0367
chr6	34334246	34346949	Akr1b10	11.8428	10.7859	-0.134857	chr6	34334246	34346949	Akr1b10	29.7912	12.546	-1.24765
chr4	62167017	62181097	Alad	8.61439	9.43168	0.130766	chr4	62167017	62181097	Alad	6.25526	2.87189	-1.12307
chr4	139178808	139205606	Aldh4a1	9.23376	7.26141	-0.346669	chr4	139178808	139205606	Aldh4a1	21.1593	6.26855	-1.75509
chr16	5233713	5256049	Alg1	14.5578	21.3466	0.552219	chr16	5233713	5256049	Alg1	27.9634	8.12902	-1.78239
chr5	136612014	136617484	Alkbh4	8.82547	6.07107	-0.539722	chr5	136612014	136617484	Alkbh4	16.0279	6.06132	-1.40288
chr9	3335230	3385846	Alkbh8	2.1846	1.51881	-0.524427	chr9	3335230	3385846	Alkbh8	2.74159	0.708066	-1.95306
chr2	91570294	91759006	Ambra1	13.464	7.4235	-0.85894	chr2	91570294	91759006	Ambra1	26.9597	10.7278	-1.32944
chr10	40007263	40021994	Amd1	0.0876566	4.80915	5.77777	chr10	40007263	40021994	Amd1	7.63535	0.109315	-6.12613
chr17	24292799	24300700	Amdhd2	22.2497	15.0288	-0.566053	chr17	24292799	24300700	Amdhd2	10.5338	5.19056	-1.02106
chr3	107876976	107890929	Ampd2	39.8359	26.5587	-0.584883	chr3	107876976	107890929	Ampd2	78.2461	31.33	-1.32047
chr7	117911719	117955922	Ampd3	28.6175	11.4002	-1.32784	chr7	117911719	117955922	Ampd3	109.673	39.3629	-1.4783
chr12	88041451	88068527	Angel1	3.67914	2.65389	-0.471261	chr12	88041451	88068527	Angel1	4.24883	0.915024	-2.21518
chr7	36371265	36424256	Ankrd27	15.6534	13.452	-0.21865	chr7	36371265	36424256	Ankrd27	29.2322	13.8869	-1.07383
chr1	36595015	36604097	Ankrd39	3.31264	4.11434	0.312679	chr1	36595015	36604097	Ankrd39	3.07602	0.641257	-2.26209
chr17	43671122	43680588	Ankrd66	1.27714	0.413249	-1.62783	chr17	43671122	43680588	Ankrd66	1.54437	0.187529	-3.04183
chr17	28046250	28199724	Anks1	8.03231	4.59301	-0.806376	chr17	28046250	28199724	Anks1	17.0475	7.39172	-1.20558
chr2	110495357	110790401	Ano3	2.13227	1.19194	-0.83908	chr2	110495357	110790401	Ano3	15.9139	3.20203	-2.31323
chr14	26661640	26706290	Anxa11	6.90221	6.54569	-0.0765133	chr14	26661640	26706290	Anxa11	3.31739	1.04925	-1.66068
chr10	90452055	90545488	Apaf1	11.4979	6.16381	-0.899476	chr10	90452055	90545488	Apaf1	15.9558	7.43862	-1.10097
chr10	80730916	80754326	Apba3	18.3672	32.1507	0.80772	chr10	80730916	80754326	Apba3	30.8034	11.5212	-1.41879
chr15	79719961	79738859	Apobec3	7.59042	7.68082	0.0170799	chr15	79719961	79738859	Apobec3	3.93883	0.966881	-2.02636
chr7	20281592	20284537	Apoe	37.3657	18.6047	-1.00604	chr7	20281592	20284537	Apoe	68.3641	30.4457	-1.167
chrX	20425668	20498044	Araf	51.0159	31.5278	-0.694323	chrX	20425668	20498044	Araf	98.8365	46.6806	-1.08222
chr7	112782714	112788930	Arfip2	22.7444	10.2196	-1.15418	chr7	112782714	112788930	Arfip2	37.0387	13.733	-1.43139
chr10	26492317	26638454	Arhgap18	2.72685	2.93121	0.104257	chr10	26492317	26638454	Arhgap18	1.8456	0.668192	-1.46575
chr9	31824209	32072350	Arhgap32	2.83758	1.64632	-0.78542	chr9	31824209	32072350	Arhgap32	1.82227	0.872769	-1.06207
chr9	8992506	9260885	Arhgap42	5.72144	3.34538	-0.774207	chr9	8992506	9260885	Arhgap42	8.35075	3.94942	-1.08027
chr7	25688004	25711610	Arhgef1	52.8992	35.2212	-0.5868	chr7	25688004	25711610	Arhgef1	81.3353	37.3052	-1.12451
chr3	87421480	87552545	Arhgef11	9.04604	6.51856	-0.472733	chr3	87421480	87552545	Arhgef11	7.87118	3.4708	-1.18131
chr8	3353436	3456601	Arhgef18	10.0021	4.04955	-1.30447	chr8	3353436	3456601	Arhgef18	9.42206	3.05024	-1.62712
chr1	34735026	34869583	Arhgef4	2.99853	1.16869	-1.35936	chr1	34735026	34869583	Arhgef4	7.95875	2.35825	-1.75483
chr14	52604507	52640408	Arhgef40	25.5847	17.1739	-0.575067	chr14	52604507	52640408	Arhgef40	33.3866	15.8234	-1.07721
chr13	54676373	54682489	Arl10	6.80795	2.33941	-1.54107	chr13	54676373	54682489	Arl10	3.57591	0.504237	-2.82614
chr8	72744091	72787004	Armc6	14.7083	10.2544	-0.520387	chr8	72744091	72787004	Armc6	11.7693	4.49516	-1.38859
chr1	88051354	88174859	Armc9	3.00954	1.98681	-0.599087	chr1	88051354	88174859	Armc9	6.32312	2.05199	-1.62361
chrX	131291090	131295995	Armcx3	7.46094	6.10957	-0.288286	chrX	131291090	131295995	Armcx3	5.07229	2.42043	-1.06738
chr6	146754051	146782051	Arntl2	2.52046	0.507855	-2.3112	chr6	146754051	146782051	Arntl2	8.66236	1.49657	-2.5331
chr7	75881879	75894124	Arrdc4	1.2197	1.27164	0.0601657	chr7	75881879	75894124	Arrdc4	1.85391	0.167532	-3.46806
chr13	3633277	3651025	Asb13	3.28755	3.07602	-0.0959472	chr13	3633277	3651025	Asb13	6.24638	2.82844	-1.14301
chr2	30678617	30683820	Asb6	47.9099	24.4211	-0.972195	chr2	30678617	30683820	Asb6	53.2204	23.9587	-1.15143
chr3	88769733	88883297	Ash1l	7.48582	6.41625	-0.222431	chr3	88769733	88883297	Ash1l	24.2655	10.7437	-1.17541
chr5	23919268	23923652	Asic3	3.96265	1.22465	-1.6941	chr5	23919268	23923652	Asic3	3.03599	0.721941	-2.07221
chr5	130487127	130500251	Asl	11.0305	12.9302	0.229236	chr5	130487127	130500251	Asl	14.1172	6.31521	-1.16055
chr4	155114748	155135207	Atad3a	61.4695	47.7621	-0.364004	chr4	155114748	155135207	Atad3a	102.556	47.959	-1.09654
chr6	136467371	136555900	Atf7ip	6.00608	9.01872	0.586499	chr6	136467371	136555900	Atf7ip	9.01206	3.74125	-1.26834
chr19	6241667	6262304	Atg2a	10.9293	8.28943	-0.39885	chr19	6241667	6262304	Atg2a	15.606	6.40724	-1.28432
chr12	70847834	71087989	Atl1	1.88865	0.534684	-1.8206	chr12	70847834	71087989	Atl1	2.9816	0.80069	-1.89677
chr8	72315061	72331647	Atp13a1	54.7354	21.2455	-1.36531	chr8	72315061	72331647	Atp13a1	82.274	30.6621	-1.42398
chr7	133572280	133606587	Atp2a1	11.4896	7.27964	-0.65839	chr7	133572280	133606587	Atp2a1	3.62799	1.80435	-1.00769
chr9	95755836	95852063	Atr	6.32153	3.07989	-1.0374	chr9	95755836	95852063	Atr	24.5605	9.09788	-1.43274
chr9	108960445	108976638	Atrip-trex1	1.30145	1.42521	0.131055	chr9	108960445	108976638	Atrip-trex1	3.69975	1.70827	-1.11489
chr3	108005145	108013445	Atxn7l2	14.6422	5.8647	-1.32001	chr3	108005145	108013445	Atxn7l2	21.3935	5.84751	-1.87128
chr8	107749087	107779053	B3gnt9	2.23641	3.39475	0.602117	chr8	107749087	107779053	B3gnt9	4.63625	1.73906	-1.41465
chr1	173200458	173207026	B4galt3	28.4261	14.1243	-1.00904	chr1	173200458	173207026	B4galt3	46.7147	21.8145	-1.09859
chr13	24893525	24904768	BC005537	45.3274	37.0708	-0.290101	chr13	24893525	24904768	BC005537	54.265	21.9457	-1.30609
chr2	30828352	30837461	BC005624	42.1021	43.2596	0.039127	chr2	30828352	30837461	BC005624	50.5201	18.9749	-1.41276
chr10	81069052	81072581	BC025920	2.85109	1.5641	-0.866181	chr10	81069052	81072581	BC025920	4.21396	1.61211	-1.38622
chr12	85750017	85791974	Bbof1	0.954912	1.1258	0.237516	chr12	85750017	85791974	Bbof1	2.26518	0.740718	-1.61263
chr2	69485227	69505628	Bbs5	7.81097	5.18258	-0.591831	chr2	69485227	69505628	Bbs5	8.14526	3.55306	-1.1969
chr3	36472064	36512311	Bbs7	3.36105	5.84165	0.797463	chr3	36472064	36512311	Bbs7	5.1375	2.5211	-1.02701
chr9	83818743	84017847	Bckdhb	17.6005	12.6711	-0.474069	chr9	83818743	84017847	Bckdhb	55.6719	26.8561	-1.0517
chrX	45694534	45759905	Bcorl1	2.65244	3.1152	0.232006	chrX	45694534	45759905	Bcorl1	8.38997	3.35622	-1.32183
chr12	106801381	106831281	Bdkrb2	2.27213	0.185534	-3.61429	chr12	106801381	106831281	Bdkrb2	2.05329	0.143329	-3.84054
chr7	16556610	16584844	Bicra	9.68957	2.86053	-1.76015	chr7	16556610	16584844	Bicra	11.6783	2.53589	-2.20326
chr11	101350077	101413269	Brca1	11.3951	7.52567	-0.598528	chr11	101350077	101413269	Brca1	10.4017	3.66906	-1.50334
chr5	151325195	151372721	Brca2	2.93195	2.82361	-0.0543199	chr5	151325195	151372721	Brca2	6.23626	2.99952	-1.05595
chrX	72661966	72701040	Brcc3	8.60297	23.8837	1.47312	chrX	72661966	72701040	Brcc3	14.8384	7.25982	-1.03133
chr8	28234303	28239104	Brf2	13.5258	8.72846	-0.631915	chr8	28234303	28239104	Brf2	8.56715	4.10714	-1.06068
chr2	138082319	138113158	Btbd3	5.81789	3.12534	-0.896484	chr2	138082319	138113158	Btbd3	3.17908	0.655948	-2.27696
chr12	104022857	104116616	Btbd7	5.13687	4.24613	-0.274741	chr12	104022857	104116616	Btbd7	10.7384	3.8363	-1.48499
chr11	88579956	88589886	C030037D09Rik	4.60546	5.80827	0.334764	chr11	88579956	88589886	C030037D09Rik	5.82923	1.00436	-2.53703
chr5	52591222	52607672	C130083M11Rik	1.1869	0.534139	-1.15191	chr5	52591222	52607672	C130083M11Rik	1.82945	0.56049	-1.70665
chr10	75108854	75227102	Cabin1	17.9618	8.66024	-1.05245	chr10	75108854	75227102	Cabin1	35.4392	15.2173	-1.21963
chr2	179993243	180008170	Cables2	12.6	6.30434	-0.999012	chr2	179993243	180008170	Cables2	13.8624	5.91416	-1.22893
chr17	85489965	85857929	Camkmt	2.6415	3.25641	0.301926	chr17	85489965	85857929	Camkmt	6.53994	2.81283	-1.21725
chr6	115724574	115758761	Cand2	11.8262	13.0232	0.139101	chr6	115724574	115758761	Cand2	8.63101	4.21939	-1.0325
chr15	78605565	78633472	Card10	2.1763	1.05578	-1.04358	chr15	78605565	78633472	Card10	11.7037	5.67095	-1.04531
chr15	5047438	5058533	Card6	3.17671	2.65009	-0.261492	chr15	5047438	5058533	Card6	3.17534	1.57898	-1.00792
chr8	11514016	11550771	Cars2	15.2034	14.5669	-0.0617052	chr8	11514016	11550771	Cars2	19.7459	8.41026	-1.23133
chr11	115660665	115674906	Caskin2	13.4232	6.45369	-1.05654	chr11	115660665	115674906	Caskin2	18.4683	6.79202	-1.44314
chr4	141349526	141381920	Casp9	6.18433	3.06874	-1.01097	chr4	141349526	141381920	Casp9	4.12878	1.91474	-1.10857
chr11	4118227	4122412	Castor1	1.9326	3.54877	0.87678	chr11	4118227	4122412	Castor1	7.3852	1.84233	-2.0031
chr2	121220090	121239528	Catsper2	2.51471	0.751694	-1.74217	chr2	121220090	121239528	Catsper2	2.72407	0.614684	-2.14784
chr9	43957344	44042129	Cbl	2.21385	0.713153	-1.63427	chr9	43957344	44042129	Cbl	2.06184	0.425158	-2.27786
chr17	31749567	31774150	Cbs	0.774294	1.4143	0.869139	chr17	31749567	31774150	Cbs	1.45314	0.0932799	-3.96146
chr8	86656726	86671816	Cc2d1a	19.5973	10.1203	-0.953409	chr8	86656726	86671816	Cc2d1a	18.4553	8.69071	-1.08649
chr14	70537975	70553598	Ccar2	31.1848	23.0625	-0.435291	chr14	70537975	70553598	Ccar2	40.3258	19.4689	-1.05054
chr2	76847962	77008692	Ccdc141	4.71059	1.39157	-1.75919	chr2	76847962	77008692	Ccdc141	5.13812	1.31743	-1.96351
chr1	166205728	166217978	Ccdc181	1.76873	3.7923	1.10035	chr1	166205728	166217978	Ccdc181	3.82273	0.986912	-1.95361
chr10	17933481	17954787	Ccdc28a	2.62394	2.42409	-0.114291	chr10	17933481	17954787	Ccdc28a	7.8739	3.46336	-1.1849
chr4	129296517	129301152	Ccdc28b	3.14293	3.84028	0.289101	chr4	129296517	129301152	Ccdc28b	12.4525	6.09027	-1.03186
chr11	102546001	102559039	Ccdc43	18.0966	15.3358	-0.238813	chr11	102546001	102559039	Ccdc43	16.4743	6.73896	-1.28962
chr9	108985009	108995877	Ccdc51	8.21279	9.68658	0.238115	chr9	108985009	108995877	Ccdc51	8.43607	3.13722	-1.42708
chr11	120687855	120794186	Ccdc57	1.58706	1.15825	-0.454407	chr11	120687855	120794186	Ccdc57	5.00082	2.28545	-1.12969
chr7	19476232	19495753	Ccdc61	17.9877	10.3696	-0.794647	chr7	19476232	19495753	Ccdc61	22.877	7.30034	-1.64786
chr16	17646562	17650831	Ccdc74a	2.46271	0.923298	-1.41538	chr16	17646562	17650831	Ccdc74a	1.24907	0.393381	-1.66685
chr19	6919112	6932701	Ccdc88b	1.00343	0.703685	-0.511935	chr19	6919112	6932701	Ccdc88b	2.09026	0.527369	-1.9868
chr4	41707315	41721049	Ccl27a	3.83399	9.68566	1.33701	chr4	41707315	41721049	Ccl27a	7.59767	3.53326	-1.10456
chr3	86799757	86803262	Cd1d1	4.9768	2.13446	-1.22134	chr3	86799757	86803262	Cd1d1	1.49212	0.126553	-3.55956
chr11	69477714	69479672	Cd68	2.89737	5.34573	0.883645	chr11	69477714	69479672	Cd68	8.41255	2.46149	-1.77301
chr2	131012683	131024247	Cdc25b	108.043	76.3288	-0.5013	chr2	131012683	131024247	Cdc25b	150.254	60.122	-1.32144
chr12	112531182	112615929	Cdc42bpb	26.166	16.8674	-0.633457	chr12	112531182	112615929	Cdc42bpb	54.9197	15.8279	-1.79486
chr19	6306456	6325652	Cdc42bpg	14.1602	6.33426	-1.16059	chr19	6306456	6325652	Cdc42bpg	40.0877	11.2697	-1.83071
chr2	72314275	72324947	Cdca7	27.0931	34.9423	0.367051	chr2	72314275	72324947	Cdca7	16.8445	7.05029	-1.25652
chr5	92435099	92472068	Cdkl2	1.5858	1.23733	-0.357987	chr5	92435099	92472068	Cdkl2	2.49401	1.10131	-1.17924
chr11	51817722	51903280	Cdkl3	2.01676	1.27254	-0.664329	chr11	51817722	51903280	Cdkl3	2.42884	0.831418	-1.54662
chr9	123836859	123839607	Cdkn2d	3.69297	6.34694	0.781279	chr9	123836859	123839607	Cdkn2d	1.59411	0.396412	-2.00768
chr8	125091914	125097030	Cdt1	65.4645	73.4488	0.166026	chr8	125091914	125097030	Cdt1	53.0995	22.7682	-1.22168
chr5	86441049	86494608	Cenpc1	10.6205	11.0572	0.0581393	chr5	86441049	86494608	Cenpc1	10.3412	5.09296	-1.02182
chr13	49559427	49748100	Cenpp	4.06786	17.5873	2.11219	chr13	49559427	49748100	Cenpp	1.42773	0.500557	-1.51212
chr8	108368577	108375908	Cenpt	42.0062	31.8976	-0.397156	chr8	108368577	108375908	Cenpt	93.4335	44.4257	-1.07255
chr4	153349669	153381334	Cep104	4.99862	6.22214	0.315879	chr4	153349669	153381334	Cep104	5.30435	2.4356	-1.1229
chr11	108286579	108721929	Cep112	4.24778	2.87686	-0.562216	chr11	108286579	108721929	Cep112	3.08286	0.526381	-2.55009
chr11	119925743	119948141	Cep131	7.9151	5.14991	-0.620062	chr11	119925743	119948141	Cep131	8.18018	3.75734	-1.12242
chr12	113960384	113984802	Cep170b	21.1702	21.891	0.0483019	chr12	113960384	113984802	Cep170b	40.1783	18.3809	-1.12821
chr2	155782293	155824636	Cep250	14.6625	5.14147	-1.51188	chr2	155782293	155824636	Cep250	20.0471	6.66153	-1.58947
chr11	118162374	118216725	Cep295nl	0.689221	1.05988	0.620869	chr11	118162374	118216725	Cep295nl	2.65226	0.590321	-2.16765
chr19	16030262	16059479	Cep78	12.402	7.61688	-0.703302	chr19	16030262	16059479	Cep78	10.7287	4.28074	-1.32554
chr7	36182081	36224849	Cep89	11.6525	8.51635	-0.452332	chr7	36182081	36224849	Cep89	11.7338	3.75209	-1.6449
chr15	99566022	99602946	Cers5	32.8373	31.814	-0.045675	chr15	99566022	99602946	Cers5	50.6443	24.6302	-1.03997
chr8	107485617	107493437	Ces2g	4.61327	2.36831	-0.961928	chr8	107485617	107493437	Ces2g	25.3662	10.4412	-1.28062
chr9	71474313	71619409	Cgnl1	9.22088	9.35064	0.0201618	chr9	71474313	71619409	Cgnl1	11.4277	4.74604	-1.26774
chr3	97364670	97414113	Chd1l	6.92341	6.29065	-0.138274	chr3	97364670	97414113	Chd1l	5.26633	2.60978	-1.01287
chr8	93352733	93578407	Chd9	3.5432	1.67458	-1.08125	chr8	93352733	93578407	Chd9	8.66006	3.61996	-1.2584
chr5	24092561	24107820	Chpf2	28.6989	16.9337	-0.761093	chr5	24092561	24107820	Chpf2	29.0059	13.7219	-1.07987
chr16	20724526	20742457	Chrd	3.21783	0.420834	-2.93476	chr16	20724526	20742457	Chrd	2.29174	0.203456	-3.49366
chr7	35459486	35597730	Chst8	1.74394	2.69743	0.629239	chr7	35459486	35597730	Chst8	2.23838	0.950385	-1.23587
chr17	25910720	25922531	Ciao3	26.0849	12.7972	-1.02739	chr17	25910720	25922531	Ciao3	26.283	7.39468	-1.82957
chrX	6735537	6896484	Clcn5	7.50348	4.39539	-0.771569	chrX	6735537	6896484	Clcn5	5.58387	2.65273	-1.07379
chr16	10545431	10744971	Clec16a	2.05134	1.28456	-0.675289	chr16	10545431	10744971	Clec16a	4.35856	2.12092	-1.03916
chr6	129130632	129136553	Clec2d	21.8772	25.1989	0.203935	chr6	129130632	129136553	Clec2d	21.4755	7.97269	-1.42956
chr7	133714720	133738536	Cln3	3.73033	4.10788	0.139092	chr7	133714720	133738536	Cln3	11.0417	5.29033	-1.06153
chr11	74463005	74484356	Cluh	69.3	36.5622	-0.922504	chr11	74463005	74484356	Cluh	62.8461	28.3091	-1.15056
chr2	156137581	156201374	Cnbd2	2.49001	1.36785	-0.864238	chr2	156137581	156201374	Cnbd2	4.9828	1.32941	-1.90617
chr19	5088537	5098521	Cnih2	4.95515	2.97089	-0.738036	chr19	5088537	5098521	Cnih2	4.1448	1.8545	-1.16027
chr19	12838017	12870613	Cntf	2.67998	1.17328	-1.19168	chr19	12838017	12870613	Cntf	12.9431	1.19369	-3.43868
chr8	127044666	127075907	Cog2	12.5226	10.3538	-0.274369	chr8	127044666	127075907	Cog2	23.4136	9.46575	-1.30655
chr8	113334391	113406134	Cog4	21.8515	28.4354	0.379953	chr8	113334391	113406134	Cog4	37.1551	17.874	-1.0557
chr3	52786044	52821145	Cog6	9.166	8.32855	-0.138227	chr3	52786044	52821145	Cog6	7.41467	3.06356	-1.27517
chr8	109572608	109580637	Cog8	23.0292	17.9902	-0.356251	chr8	109572608	109580637	Cog8	110.002	34.8558	-1.65806
chr11	88835248	88852927	Coil	7.20172	6.89283	-0.0632453	chr11	88835248	88852927	Coil	28.5304	11.8985	-1.26172
chr14	22650782	22676148	Comtd1	5.48434	9.49426	0.791738	chr14	22650782	22676148	Comtd1	4.3451	1.94895	-1.15669
chr10	127800152	127807093	Coq10a	14.4995	7.21134	-1.00766	chr10	127800152	127807093	Coq10a	16.6386	4.50821	-1.8839
chr1	181890890	182126151	Coq8a	4.18819	2.22473	-0.912698	chr1	181890890	182126151	Coq8a	1.92213	0.461877	-2.05712
chr7	28018031	28042968	Coq8b	12.9414	8.47606	-0.610527	chr7	28018031	28042968	Coq8b	9.70106	3.1587	-1.61881
chr16	4626883	4679720	Coro7	16.1436	4.85195	-1.73433	chr16	4626883	4679720	Coro7	44.1606	9.19723	-2.26349
chr9	57447798	57454088	Cplx3	1.04806	0.45856	-1.19254	chr9	57447798	57454088	Cplx3	2.57055	0.469955	-2.45148
chr15	76406788	76438021	Cpsf1	32.9599	21.6426	-0.606842	chr15	76406788	76438021	Cpsf1	40.9602	15.5326	-1.39893
chr3	90057779	90068047	Crtc2	29.5474	16.8608	-0.809359	chr3	90057779	90068047	Crtc2	63.8902	28.9407	-1.14249
chr16	59471600	59600873	Crybg3	2.27051	2.24086	-0.0189644	chr16	59471600	59600873	Crybg3	6.66573	3.07911	-1.11425
chr14	57893870	58017320	Cryl1	0.646592	5.99871	3.21373	chr14	57893870	58017320	Cryl1	1.5578	0.349308	-2.15694
chr3	154239483	154286146	Cryz	5.22121	10.1567	0.959971	chr3	154239483	154286146	Cryz	2.84215	1.05298	-1.43251
chr11	68829412	68849975	Ctc1	23.5483	21.0707	-0.16038	chr11	68829412	68849975	Ctc1	26.2906	10.5682	-1.31482
chrX	159339199	159472473	Ctps2	5.76633	5.44953	-0.0815209	chrX	159339199	159472473	Ctps2	4.45342	1.97038	-1.17644
chr19	4855164	4860918	Ctsf	7.41068	7.53557	0.0241109	chr19	4855164	4860918	Ctsf	14.3325	5.64642	-1.34388
chr7	151621628	151656840	Cttn	79.2439	73.6401	-0.105809	chr7	151621628	151656840	Cttn	100.77	42.9918	-1.22894
chr17	46787286	46801313	Cul7	32.2624	21.7923	-0.566035	chr17	46787286	46801313	Cul7	30.4707	14.5761	-1.06382
chr17	46637557	46683337	Cul9	2.31233	1.07454	-1.10563	chr17	46637557	46683337	Cul9	7.13835	2.41787	-1.56185
chr18	74375865	74381145	Cxxc1	60.0781	41.7594	-0.52474	chr18	74375865	74381145	Cxxc1	70.5928	30.4481	-1.21317
chr19	10644967	10664531	Cyb561a3	17.0137	16.1185	-0.0779751	chr19	10644967	10664531	Cyb561a3	43.8593	19.7865	-1.14836
chr1	136302357	136308315	Cyb5r1	74.432	51.9717	-0.518198	chr1	136302357	136308315	Cyb5r1	144.508	65.6739	-1.13776
chr3	130993408	131006145	Cyp2u1	2.66532	0.733547	-1.86135	chr3	130993408	131006145	Cyp2u1	5.19952	1.18607	-2.13219
chr17	32673501	32688743	Cyp4f16	24.5732	12.4242	-0.983938	chr17	32673501	32688743	Cyp4f16	37.772	18.0964	-1.06162
chr12	25350702	25366660	Cys1	1.44342	1.1151	-0.372325	chr12	25350702	25366660	Cys1	2.82274	0.804162	-1.81154
chr11	113545747	113555961	D11Wsu47e	11.029	8.25019	-0.418799	chr11	113545747	113555961	D11Wsu47e	18.5739	6.71335	-1.46817
chr7	132851383	133018309	D430042O09Rik	4.91933	2.07868	-1.2428	chr7	132851383	133018309	D430042O09Rik	5.35419	1.43432	-1.9003
chr5	36943137	37087260	D5Ertd579e	11.3236	4.66957	-1.27797	chr5	36943137	37087260	D5Ertd579e	25.2611	10.1819	-1.31091
chr9	108472222	108481044	Dalrd3	28.147	13.8277	-1.02542	chr9	108472222	108481044	Dalrd3	33.1783	9.48018	-1.80725
chr17	34046389	34052535	Daxx	13.9862	14.5299	0.0550281	chr17	34046389	34052535	Daxx	9.40901	4.45919	-1.07726
chr13	55574788	55589437	Dbn1	24.4879	30.1367	0.299453	chr13	55574788	55589437	Dbn1	42.8825	17.6433	-1.28127
chr11	5688485	5700983	Dbnl	32.4275	36.06	0.153183	chr11	5688485	5700983	Dbnl	37.807	16.1863	-1.22388
chr9	106724254	106783323	Dcaf1	8.44083	8.65	0.0353152	chr9	106724254	106783323	Dcaf1	16.4312	7.15065	-1.20029
chr12	84861415	84882942	Dcaf4	13.7714	13.5396	-0.0244906	chr12	84861415	84882942	Dcaf4	50.3732	20.0489	-1.32913
chr1	174078145	174126524	Dcaf8	59.6011	29.003	-1.03914	chr1	174078145	174126524	Dcaf8	77.8859	29.0264	-1.424
chr19	56603650	56622712	Dclre1a	4.40443	4.33353	-0.0234118	chr19	56603650	56622712	Dclre1a	13.7691	6.79067	-1.01981
chr6	118537257	119171632	Dcp1b	2.73848	1.11197	-1.30026	chr6	118537257	119171632	Dcp1b	4.4412	1.34091	-1.72773
chr6	83115917	83150112	Dctn1	27.8642	33.5762	0.269028	chr6	83115917	83150112	Dctn1	38.2501	17.7789	-1.1053
chr3	105481379	105490489	Ddx20	15.6481	10.1714	-0.621476	chr3	105481379	105490489	Ddx20	12.8941	6.05898	-1.08956
chr15	98475937	98493320	Ddx23	37.2307	33.2737	-0.16211	chr15	98475937	98493320	Ddx23	78.0701	25.8482	-1.59471
chr13	55631770	55638019	Ddx41	39.0465	26.7938	-0.543295	chr13	55631770	55638019	Ddx41	62.2885	31.0813	-1.00292
chr8	72806897	72826370	Ddx49	23.6185	27.8772	0.239167	chr8	72806897	72826370	Ddx49	34.6405	14.0459	-1.30231
chr11	6157547	6167732	Ddx56	30.4629	22.7949	-0.418342	chr11	6157547	6167732	Ddx56	25.765	11.1359	-1.2102
chr2	37631768	38142904	Dennd1a	4.99409	3.10973	-0.683433	chr2	37631768	38142904	Dennd1a	7.39108	3.48463	-1.08478
chr3	102931478	102973656	Dennd2c	5.70334	1.6334	-1.80393	chr3	102931478	102973656	Dennd2c	6.57589	1.67533	-1.97274
chr7	117037294	117103984	Dennd5a	17.8201	20.4858	0.201118	chr7	117037294	117103984	Dennd5a	42.0717	17.9286	-1.23059
chr6	137703097	137786393	Dera	4.82599	14.0682	1.54354	chr6	137703097	137786393	Dera	3.40842	0.707789	-2.26771
chr15	76332441	76342424	Dgat1	23.2488	12.0111	-0.952783	chr15	76332441	76342424	Dgat1	32.3059	12.613	-1.35689
chr10	128143313	128182140	Dgka	12.672	5.48815	-1.20726	chr10	128143313	128182140	Dgka	41.2988	16.8455	-1.29373
chr11	84634229	84642505	Dhrs11	10.0405	5.15231	-0.962538	chr11	84634229	84642505	Dhrs11	13.06	6.40378	-1.02816
chr17	36016722	36029613	Dhx16	30.4187	17.1381	-0.82775	chr17	36016722	36029613	Dhx16	37.8971	13.9032	-1.44667
chr9	109986822	110020120	Dhx30	29.808	21.9784	-0.439616	chr9	109986822	110020120	Dhx30	41.6268	17.5823	-1.24338
chr7	16782569	16807381	Dhx34	13.8451	9.86494	-0.488993	chr7	16782569	16807381	Dhx34	14.4496	5.25553	-1.45912
chr2	158620542	158683956	Dhx35	16.3423	9.28062	-0.816317	chr2	158620542	158683956	Dhx35	23.9823	9.60103	-1.32071
chr1	88600378	88946672	Dis3l2	4.8259	6.832	0.50151	chr1	88600378	88946672	Dis3l2	7.59122	2.99521	-1.34167
chr14	24953174	25065142	Dlg5	13.2117	11.0976	-0.25156	chr14	24953174	25065142	Dlg5	32.2463	11.1947	-1.52631
chr7	26404432	26410569	Dmac2	29.6051	23.2449	-0.348932	chr7	26404432	26410569	Dmac2	48.1216	23.5484	-1.03106
chr4	117347290	117354830	Dmap1	32.2114	23.4641	-0.457119	chr4	117347290	117354830	Dmap1	35.6602	16.2258	-1.13602
chr7	19669197	19679169	Dmpk	624.034	300.355	-1.05496	chr7	19669197	19679169	Dmpk	1114.67	535.943	-1.05647
chr18	49992650	50125127	Dmxl1	3.27352	2.35422	-0.475595	chr18	49992650	50125127	Dmxl1	7.72592	3.64847	-1.08241
chr7	4474534	4484067	Dnaaf3	1.95441	0.724895	-1.43089	chr7	4474534	4484067	Dnaaf3	5.6506	1.0348	-2.44906
chr5	139493257	139662464	Dnaaf5	10.6912	11.6655	0.125822	chr5	139493257	139662464	Dnaaf5	8.25127	3.99924	-1.04489
chr10	128242609	128258685	Dnajc14	13.6732	20.7986	0.605134	chr10	128242609	128258685	Dnajc14	122.396	57.8734	-1.08058
chr9	21229351	21314678	Dnm2	34.8005	35.7409	0.0384701	chr9	21229351	21314678	Dnm2	52.6646	20.4275	-1.36632
chr12	3806979	3914443	Dnmt3a	6.2609	2.59744	-1.26928	chr12	3806979	3914443	Dnmt3a	4.57135	1.3274	-1.78402
chr2	164571514	164593719	Dnttip1	20.6283	38.9614	0.917423	chr2	164571514	164593719	Dnttip1	44.596	14.6403	-1.60697
chr9	21604623	21657079	Dock6	12.5888	6.2809	-1.0031	chr9	21604623	21657079	Dock6	21.0382	8.36129	-1.33122
chr8	97381349	97400212	Dok4	4.35282	2.18637	-0.993412	chr8	97381349	97400212	Dok4	5.17054	2.02565	-1.35193
chr9	86360760	86465449	Dop1a	2.9478	1.20345	-1.29246	chr9	86360760	86465449	Dop1a	6.4068	1.92365	-1.73576
chr4	117561247	117564608	Dph2	16.5318	10.2179	-0.694145	chr4	117561247	117564608	Dph2	18.0853	7.62131	-1.24671
chr9	64880264	64930458	Dpp8	25.1414	14.1435	-0.829928	chr9	64880264	64930458	Dpp8	44.0941	17.4965	-1.33352
chr6	83007837	83017213	Dqx1	4.86948	0.431536	-3.49622	chr6	83007837	83017213	Dqx1	2.6523	0.140645	-4.23711
chr15	54907655	54922046	Dscc1	5.70716	12.0256	1.07527	chr15	54907655	54922046	Dscc1	2.65024	1.31706	-1.0088
chr19	53603634	53616299	Dusp5	9.62376	7.23846	-0.410918	chr19	53603634	53616299	Dusp5	16.1494	6.50583	-1.31168
chr9	114597948	114632895	Dync1li1	23.954	25.3835	0.083626	chr9	114597948	114632895	Dync1li1	24.7754	9.17061	-1.43382
chr17	85025814	85054904	Dync2li1	3.46407	9.23554	1.41473	chr17	85025814	85054904	Dync2li1	1.36902	0.185246	-2.88562
chr1	133025017	133034811	Dyrk3	7.46187	7.1788	-0.0557941	chr1	133025017	133034811	Dyrk3	6.1711	2.79024	-1.14514
chr6	83958591	84161053	Dysf	1.64207	0.935408	-0.811848	chr6	83958591	84161053	Dysf	1.44582	0.683679	-1.0805
chr2	6109510	6242657	Echdc3	0.790746	1.36765	0.790413	chr2	6109510	6242657	Echdc3	4.33845	0.649933	-2.73882
chr18	35872739	35882027	Ecscr	0.483179	1.42789	1.56325	chr18	35872739	35882027	Ecscr	1.43907	0.553738	-1.37786
chr8	108404780	108417125	Edc4	29.4714	11.9513	-1.30215	chr8	108404780	108417125	Edc4	45.2626	16.2876	-1.47455
chr7	140019139	140044330	Eef1akmt2	4.76134	14.5312	1.60972	chr7	140019139	140044330	Eef1akmt2	10.8119	4.28097	-1.33661
chr14	55535379	55545625	Efs	12.6567	9.92489	-0.350774	chr14	55535379	55545625	Efs	24.923	6.30333	-1.98329
chr2	26436602	26448202	Egfl7	1.59513	4.98561	1.6441	chr2	26436602	26448202	Egfl7	4.05949	1.55091	-1.38818
chr17	35035418	35051018	Ehmt2	57.523	48.5668	-0.244168	chr17	35035418	35051018	Ehmt2	108.902	51.6699	-1.07563
chr10	82296695	82360469	Eid3	11.7051	1.56497	-2.90294	chr10	82296695	82360469	Eid3	14.3393	0.773303	-4.21279
chr2	118214352	118300970	Eif2ak4	6.2891	4.16953	-0.592969	chr2	118214352	118300970	Eif2ak4	12.9047	5.72921	-1.17149
chr18	73894691	73914133	Elac1	4.68539	2.05329	-1.19023	chr18	73894691	73914133	Elac1	7.12063	3.04343	-1.22631
chr11	64792536	64976463	Elac2	14.6842	17.6667	0.266766	chr11	64792536	64976463	Elac2	31.2542	14.0807	-1.15034
chr2	165113530	165151979	Elmo2	13.1383	10.4562	-0.329418	chr2	165113530	165151979	Elmo2	17.6591	8.28482	-1.09187
chr8	107829500	107834523	Elmo3	3.4059	1.31785	-1.36986	chr8	107829500	107834523	Elmo3	3.79344	1.09837	-1.78814
chr4	56762551	56822477	Elp1	15.1891	10.6068	-0.518048	chr4	56762551	56822477	Elp1	16.4076	6.46211	-1.34428
chr11	94491090	94515057	Eme1	17.347	10.1639	-0.771236	chr11	94491090	94515057	Eme1	5.03112	2.38769	-1.07526
chr12	109609362	109940516	Eml1	13.6232	9.01511	-0.59565	chr12	109609362	109940516	Eml1	33.8614	14.5763	-1.21602
chr7	19761769	19791831	Eml2	12.9038	11.312	-0.189943	chr7	19761769	19791831	Eml2	33.7127	7.335	-2.20042
chr19	9004152	9016072	Eml3	19.1679	13.9062	-0.462962	chr19	9004152	9016072	Eml3	35.9528	17.9477	-1.00231
chr2	25251393	25256843	Entpd2	2.13785	0.966044	-1.146	chr2	25251393	25256843	Entpd2	1.36752	0.4872	-1.48897
chr14	69955207	69984799	Entpd4b	13.2921	9.73228	-0.449723	chr14	69955207	69984799	Entpd4b	25.175	0.000137425	-17.483
chr2	150574815	150597410	Entpd6	8.10414	9.81379	0.276151	chr2	150574815	150597410	Entpd6	26.9724	13.1713	-1.03408
chr6	97060017	97098880	Eogt	14.5826	6.59386	-1.14505	chr6	97060017	97098880	Eogt	12.3777	4.01751	-1.62337
chr4	140857135	140885299	Epha2	70.4391	51.3764	-0.455272	chr4	140857135	140885299	Epha2	124.406	61.0375	-1.02728
chr9	111174348	111181595	Epm2aip1	9.47706	3.81067	-1.31439	chr9	111174348	111181595	Epm2aip1	5.29379	1.84904	-1.51752
chr9	21763342	21768020	Epor	4.1067	3.61826	-0.182682	chr9	21763342	21768020	Epor	2.63869	1.1607	-1.18483
chr13	108948931	108985176	Ercc8	7.65765	5.60766	-0.449501	chr13	108948931	108985176	Ercc8	14.1502	4.06486	-1.79955
chr11	106258933	106349110	Ern1	4.59442	0.875333	-2.39198	chr11	106258933	106349110	Ern1	5.42594	0.833591	-2.70246
chr13	12658149	12701795	Ero1lb	4.40743	1.92188	-1.19742	chr13	12658149	12701795	Ero1lb	1.17117	0.308113	-1.92641
chr15	102126723	102154787	Espl1	26.6966	12.321	-1.11553	chr15	102126723	102154787	Espl1	13.8553	6.21215	-1.15727
chr4	151494984	151526498	Espn	0.899647	1.16963	0.378621	chr4	151494984	151526498	Espn	2.51983	0.923602	-1.44798
chr19	6981186	6996298	Esrra	55.4715	32.4919	-0.771667	chr19	6981186	6996298	Esrra	97.5592	46.3482	-1.07376
chr16	17900801	17911441	Ess2	15.2841	10.1301	-0.593374	chr16	17900801	17911441	Ess2	19.5861	7.24386	-1.435
chr11	101631061	101646624	Etv4	22.0792	19.8012	-0.157102	chr11	101631061	101646624	Etv4	36.1612	10.7229	-1.75375
chr1	177810908	177841527	Exo1	5.64823	6.81034	0.269927	chr1	177810908	177841527	Exo1	31.2419	11.4317	-1.45045
chr13	74307252	74346148	Exoc3	5.48608	9.00352	0.714715	chr13	74307252	74346148	Exoc3	7.85923	3.35688	-1.22727
chr4	133912287	133928462	Extl1	1.71428	0.833554	-1.04025	chr4	133912287	133928462	Extl1	3.79889	1.27925	-1.57028
chr11	120230875	120240060	Faap100	19.2122	8.13963	-1.23899	chr11	120230875	120240060	Faap100	49.7846	17.3618	-1.51978
chr14	21167383	21202713	Fam149b	6.51633	14.3151	1.1354	chr14	21167383	21202713	Fam149b	10.5293	4.9556	-1.08728
chr5	20930720	20987942	Fam185a	6.22946	5.16731	-0.269691	chr5	20930720	20987942	Fam185a	7.07873	2.90024	-1.28732
chr4	41464469	41516560	Fam219aos	4.14673	3.50736	-0.241585	chr4	41464469	41516560	Fam219aos	1.76042	0.432386	-2.02553
chr6	49317737	49339903	Fam221a	1.3149	1.87844	0.514582	chr6	49317737	49339903	Fam221a	1.13045	0.441772	-1.35553
chr7	139903766	140004879	Fam53b	9.04621	6.87207	-0.396569	chr7	139903766	140004879	Fam53b	9.79217	4.54024	-1.10886
chr11	61486283	61534301	Fam83g	3.74016	1.89343	-0.982097	chr11	61486283	61534301	Fam83g	13.9326	6.1368	-1.18291
chr7	29919951	29941229	Fam98c	13.4313	7.8252	-0.779397	chr7	29919951	29941229	Fam98c	25.0628	11.6985	-1.09923
chr7	71490270	71518942	Fan1	1.87931	1.03346	-0.86272	chr7	71490270	71518942	Fan1	2.98665	0.450602	-2.7286
chr8	125748740	125842476	Fanca	14.4534	6.91557	-1.06349	chr8	125748740	125842476	Fanca	11.207	5.25451	-1.09278
chr13	63066252	63533053	Fancc	5.73479	5.62657	-0.0274852	chr13	63066252	63533053	Fancc	9.76627	4.25606	-1.19829
chr1	95408680	95532304	Farp2	1.32392	1.11045	-0.253677	chr1	95408680	95532304	Farp2	1.6802	0.116451	-3.85084
chr11	116003598	116029492	Fbf1	31.9114	11.1257	-1.52017	chr11	116003598	116029492	Fbf1	172.262	51.1459	-1.75191
chr7	134622471	134635014	Fbrs	21.9134	16.0749	-0.447002	chr7	134622471	134635014	Fbrs	32.0127	14.5031	-1.14228
chr5	110790770	110877522	Fbrsl1	18.773	14.448	-0.37779	chr5	110790770	110877522	Fbrsl1	31.7164	14.7655	-1.103
chr19	46402673	46413150	Fbxl15	7.03347	7.79593	0.148486	chr19	46402673	46413150	Fbxl15	3.59713	0.821748	-2.13008
chr15	76366157	76369176	Fbxl6	51.8289	25.7574	-1.00877	chr15	76366157	76369176	Fbxl6	82.6434	31.5626	-1.38869
chr7	29477867	29484356	Fbxo27	0.520479	1.03043	0.98534	chr7	29477867	29484356	Fbxo27	1.99407	0.865361	-1.20434
chr8	124073342	124102706	Fbxo31	8.24862	5.87652	-0.489191	chr8	124073342	124102706	Fbxo31	10.881	5.24649	-1.05238
chr11	16851377	16854775	Fbxo48	1.8176	0.703222	-1.36998	chr11	16851377	16854775	Fbxo48	1.25643	0.220412	-2.51105
chr18	46664259	46685625	Fem1c	6.42213	5.57492	-0.204102	chr18	46664259	46685625	Fem1c	5.20991	1.72187	-1.59728
chrX	147481712	147531086	Fgd1	4.73447	5.3528	0.177093	chrX	147481712	147531086	Fgd1	2.29244	0.721909	-1.66699
chr13	55254178	55270120	Fgfr4	290.961	167.294	-0.798442	chr13	55254178	55270120	Fgfr4	225.671	96.1796	-1.23042
chr8	107853059	107871870	Fhod1	21.3865	9.68769	-1.14247	chr8	107853059	107871870	Fhod1	33.8521	14.0224	-1.27151
chr2	31668809	31701525	Fibcd1	1.03011	1.7302	0.748134	chr2	31668809	31701525	Fibcd1	2.45763	0.547452	-2.16647
chr4	61961375	62021630	Fkbp15	8.24346	5.50143	-0.583443	chr4	61961375	62021630	Fkbp15	9.13804	4.14115	-1.14186
chr12	4839979	4848401	Fkbp1b	1.14882	3.32059	1.53129	chr12	4839979	4848401	Fkbp1b	2.10399	0.550067	-1.93545
chr11	77851432	77873936	Flot2	34.3402	29.1335	-0.237219	chr11	77851432	77873936	Flot2	34.5528	14.2375	-1.27911
chr1	192829710	192853660	Flvcr1	8.56327	6.09156	-0.491351	chr1	192829710	192853660	Flvcr1	6.53462	2.98558	-1.13009
chr11	103032451	103060214	Fmnl1	1.23987	1.47205	0.247635	chr11	103032451	103060214	Fmnl1	1.9427	0.524754	-1.88835
chr17	7931433	8020167	Fndc1	17.525	10.4474	-0.746275	chr17	7931433	8020167	Fndc1	15.579	7.09599	-1.13452
chr4	155068450	155070592	Fndc10	5.9834	4.22457	-0.502161	chr4	155068450	155070592	Fndc10	7.59319	2.79669	-1.44098
chr10	41905591	41996548	Foxo3	2.9577	3.56362	0.268865	chr10	41905591	41996548	Foxo3	7.67883	0.311397	-4.62406
chr9	35011805	35018640	Foxred1	16.6275	12.7612	-0.381806	chr9	35011805	35018640	Foxred1	19.1923	5.84982	-1.71406
chr2	32502114	32549695	Fpgs	28.9735	19.9312	-0.539704	chr2	32502114	32549695	Fpgs	66.6987	27.5718	-1.27446
chr11	106078239	106117398	Ftsj3	46.7223	53.6988	0.20078	chr11	106078239	106117398	Ftsj3	67.5832	32.9839	-1.0349
chr11	69446472	69466799	Fxr2	51.6391	39.9471	-0.370374	chr11	69446472	69466799	Fxr2	66.9833	26.2507	-1.35145
chr7	96552875	96558620	Fzd4	2.05598	1.45814	-0.495695	chr7	96552875	96558620	Fzd4	1.54676	0.661413	-1.22562
chr2	32841744	32986956	Garnl3	3.57644	1.40295	-1.35006	chr2	32841744	32986956	Garnl3	9.42798	3.53047	-1.41709
chr8	126042734	126060550	Gas8	15.8647	16.5283	0.0591197	chr8	126042734	126060550	Gas8	29.2798	13.2281	-1.1463
chr4	43575529	43600359	Gba2	9.76446	3.38539	-1.52822	chr4	43575529	43600359	Gba2	10.9614	3.7337	-1.55375
chr8	87396009	87417820	Gcdh	18.7616	13.5826	-0.466025	chr8	87396009	87417820	Gcdh	17.2794	5.8849	-1.55396
chr5	116015271	116072663	Gcn1	43.2177	18.1997	-1.24771	chr5	116015271	116072663	Gcn1	64.4134	20.7811	-1.63208
chr8	72839673	72877178	Gdf1	2.6942	0.681531	-1.983	chr8	72839673	72877178	Gdf1	3.60944	0.351696	-3.35937
chr7	106530027	106610384	Gdpd5	2.02544	0.821982	-1.30105	chr7	106530027	106610384	Gdpd5	10.8085	4.34485	-1.31479
chr15	78707619	78725015	Gga1	29.7028	25.9501	-0.194858	chr15	78707619	78725015	Gga1	56.4497	23.7451	-1.24934
chr7	129130235	129164712	Gga2	24.7665	21.6623	-0.1932	chr7	129130235	129164712	Gga2	22.5259	10.9613	-1.03917
chr11	115445568	115465230	Gga3	17.7036	7.58527	-1.22277	chr11	115445568	115465230	Gga3	36.1241	10.976	-1.71861
chr11	100627645	100632271	Ghdc	6.9553	3.47229	-1.00223	chr11	100627645	100632271	Ghdc	9.78218	2.24604	-2.12277
chr2	29790928	29814952	Gle1	19.9696	17.0085	-0.231551	chr2	29790928	29814952	Gle1	27.4398	10.1116	-1.44026
chr8	73455213	73456936	Gm10654	4.72204	0.824288	-2.51819	chr8	73455213	73456936	Gm10654	2.00113	0.275989	-2.85813
chr16	91689142	91729047	Gm10785	2.34831	0.468276	-2.3262	chr16	91689142	91729047	Gm10785	2.40013	0.421579	-2.50924
chr7	144629255	144661313	Gm12669	17.4992	93.033	2.41045	chr7	144629255	144661313	Gm12669	21.0646	0.0243182	-9.75857
chr2	130531935	130665881	Gm14057	0.725005	1.49264	1.0418	chr2	130531935	130665881	Gm14057	2.57593	0.86243	-1.57862
chr2	176975279	176991201	Gm14410	4.1481	0.957947	-2.11443	chr2	176975279	176991201	Gm14410	1.34287	0.107477	-3.64322
chr8	24085307	24260969	Gm15816	1.66755	2.97865	0.836923	chr8	24085307	24260969	Gm15816	4.35735	0.369656	-3.5592
chr5	138070350	138084130	Gm20605	20.8662	2.33324	-3.16076	chr5	138070350	138084130	Gm20605	18.8936	1.36933	-3.78636
chr2	168006464	168055879	Gm20716	13.3735	30.2354	1.17686	chr2	168006464	168055879	Gm20716	20.9795	9.25472	-1.18072
chr7	19834783	19841894	Gm38499	1.7985	0.924249	-0.960439	chr7	19834783	19841894	Gm38499	1.1622	0.351396	-1.7257
chr18	90749216	90763116	Gm45871	0.940591	1.13803	0.274903	chr18	90749216	90763116	Gm45871	1.2176	0.213304	-2.51305
chr3	83964360	84108697	Gm6525	0.432994	2.3314	2.42878	chr3	83964360	84108697	Gm6525	7.35576	0.637933	-3.5274
chr1	75432510	75439754	Gmppa	28.2073	25.5957	-0.140168	chr1	75432510	75439754	Gmppa	36.8188	14.4277	-1.3516
chr5	141235897	141306385	Gna12	5.669	8.21781	0.53566	chr5	141235897	141306385	Gna12	2.11838	0.625396	-1.76012
chr2	38871675	38921061	Golga1	8.00122	4.17106	-0.939806	chr2	38871675	38921061	Golga1	7.1558	3.2764	-1.127
chr1	189039389	189175308	Gpatch2	9.3906	3.58097	-1.39087	chr1	189039389	189175308	Gpatch2	7.532	2.57621	-1.54778
chr4	133130659	133140157	Gpatch3	8.58385	5.8999	-0.540933	chr4	133130659	133140157	Gpatch3	17.7292	7.00148	-1.34039
chr13	25035020	25083805	Gpld1	2.33039	1.22923	-0.92282	chr13	25035020	25083805	Gpld1	2.00341	0.742628	-1.43175
chr5	139835692	139936488	Gpr146	3.02289	1.65156	-0.872094	chr5	139835692	139936488	Gpr146	2.76645	0.95535	-1.53394
chr2	73179562	73224537	Gpr155	0.747573	1.18172	0.660598	chr2	73179562	73224537	Gpr155	1.14463	0.530642	-1.10907
chr4	132765254	132768451	Gpr3	1.51455	0.606563	-1.32016	chr4	132765254	132768451	Gpr3	3.06335	1.07878	-1.50571
chrX	132373572	132379269	Gprasp2	2.34963	0.856177	-1.45645	chrX	132373572	132379269	Gprasp2	3.77503	1.13514	-1.73361
chr2	26170130	26207630	Gpsm1	21.7755	10.1234	-1.10501	chr2	26170130	26207630	Gpsm1	33.215	12.8309	-1.37221
chr15	76527155	76530105	Gpt	6.77202	2.10406	-1.68641	chr15	76527155	76530105	Gpt	125.128	27.5657	-2.18246
chr8	123012765	123112975	Gse1	48.8528	22.8174	-1.09831	chr8	123012765	123112975	Gse1	69.2958	27.4884	-1.33394
chr8	74012626	74035668	Gtpbp3	21.8865	18.253	-0.261906	chr8	74012626	74035668	Gtpbp3	25.4655	10.5849	-1.26654
chr13	23855536	23856281	H1f1	9.16138	6.52206	-0.490239	chr13	23855536	23856281	H1f1	16.4743	5.61841	-1.55199
chr13	23830675	23831400	H1f2	27.0369	12.5103	-1.11181	chr13	23830675	23831400	H1f2	45.9549	5.01105	-3.19703
chr13	23646900	23647676	H1f3	5.49529	6.71156	0.288452	chr13	23646900	23647676	H1f3	23.3838	6.43859	-1.86069
chr13	23713645	23714427	H1f4	4.52191	6.45427	0.513322	chr13	23713645	23714427	H1f4	20.1292	8.24148	-1.28832
chr17	36131448	36179687	H2-T22	0.903748	4.0858	2.17662	chr17	36131448	36179687	H2-T22	4.7853	0.911613	-2.39212
chr13	23842956	23843461	H2ac4	7.89016	8.69032	0.139356	chr13	23842956	23843461	H2ac4	8.0463	0.746633	-3.42985
chr11	58768186	58768694	H2aw	11.459	15.9939	0.481042	chr11	58768186	58768694	H2aw	16.8083	1.48951	-3.49627
chr13	21845944	21846422	H2bc15	10.2837	4.03566	-1.34949	chr13	21845944	21846422	H2bc15	10.4379	0.82629	-3.65904
chr13	23653343	23654254	H3c6	0.467486	2.10966	2.17401	chr13	23653343	23654254	H3c6	2.58417	0.910195	-1.50545
chr13	23635920	23636823	H3c7	0.0676029	2.73322	5.33737	chr13	23635920	23636823	H3c7	2.93295	0.307837	-3.25211
chr13	21826902	21827325	H4c11	0.505781	4.68727	3.21216	chr13	21826902	21827325	H4c11	8.32916	2.10912	-1.98153
chr13	21842013	21842422	H4c12	0.274106	8.35308	4.9295	chr13	21842013	21842422	H4c12	5.24323	1.13382	-2.20926
chr3	96066856	96067240	H4c14	0.964976	3.80133	1.97794	chr3	96066856	96067240	H4c14	13.4705	1.30831	-3.36403
chr13	23789952	23790327	H4c3	6.5122	15.583	1.25875	chr13	23789952	23790327	H4c3	32.2487	14.4004	-1.16314
chr13	23673436	23673838	H4c4	5.72054	20.6368	1.851	chr13	23673436	23673838	H4c4	25.7382	10.6016	-1.27963
chr13	23643154	23643537	H4c6	0.971646	14.0885	3.85795	chr13	23643154	23643537	H4c6	20.9574	1.31637	-3.99283
chr6	136752513	136752952	H4f16	0.232195	6.42896	4.79118	chr6	136752513	136752952	H4f16	3.57061	0.976311	-1.87076
chr13	64263173	64287845	Habp4	23.5597	12.5246	-0.911554	chr13	64263173	64287845	Habp4	13.7408	6.45168	-1.09072
chr17	25910720	25922531	Haghl	9.67738	8.64978	-0.161954	chr17	25910720	25922531	Haghl	9.24452	2.23552	-2.04799
chr18	38096624	38114642	Hdac3	42.9174	52.0404	0.27807	chr18	38096624	38114642	Hdac3	44.6997	21.6135	-1.04833
chr11	102057060	102091486	Hdac5	38.4068	37.187	-0.0465642	chr11	102057060	102091486	Hdac5	40.5968	18.1269	-1.16323
chr17	56219053	56249205	Hdgfl2	73.4865	40.7199	-0.851746	chr17	56219053	56249205	Hdgfl2	89.602	41.235	-1.11966
chr19	36629128	36763969	Hectd2os	1.64597	0.534261	-1.62332	chr19	36629128	36763969	Hectd2os	2.55483	0.336317	-2.92534
chr10	118891089	119550021	Helb	6.71861	3.68652	-0.865903	chr10	118891089	119550021	Helb	7.03226	3.35408	-1.06807
chr9	66198256	66362400	Herc1	8.74157	5.81092	-0.589126	chr9	66198256	66362400	Herc1	25.8978	11.2063	-1.20852
chr11	121038906	121090623	Hexdc	8.51618	5.07236	-0.747549	chr11	121038906	121090623	Hexdc	41.4024	14.8668	-1.47762
chr3	8663358	8667038	Hey1	5.81385	6.16585	0.0848064	chr3	8663358	8667038	Hey1	4.2031	1.56735	-1.42313
chr4	122910798	122927113	Heyl	14.6901	10.8593	-0.435915	chr4	122910798	122927113	Heyl	4.78681	2.34209	-1.03127
chr13	23793902	23802723	Hfe	0.929845	1.7958	0.949564	chr13	23793902	23802723	Hfe	1.1108	0.335181	-1.72859
chr1	194336709	194597413	Hhat	1.10852	1.69106	0.609298	chr1	194336709	194597413	Hhat	1.26674	0.237973	-2.41225
chr13	42147389	42280395	Hivep1	4.3729	2.63512	-0.730719	chr13	42147389	42280395	Hivep1	13.9636	4.18912	-1.73695
chr10	80808790	80813202	Hmg20b	47.322	42.0402	-0.170741	chr10	80808790	80813202	Hmg20b	114.002	39.838	-1.51684
chr18	61290930	61336704	Hmgxb3	20.6598	9.06872	-1.18785	chr18	61290930	61336704	Hmgxb3	21.0709	8.16132	-1.36837
chr2	75497315	75507464	Hnrnpa3	34.9826	43.4106	0.311409	chr2	75497315	75507464	Hnrnpa3	20.6007	8.61578	-1.25764
chr8	72806897	72826370	Homer3	47.8124	33.7063	-0.504368	chr8	72806897	72826370	Homer3	109.25	48.0087	-1.18627
chr15	102784956	102787132	Hoxc11	18.5001	12.0934	-0.613315	chr15	102784956	102787132	Hoxc11	7.54056	2.10969	-1.83764
chr12	8320238	8350630	Hs1bp3	10.4382	4.77871	-1.12718	chr12	8320238	8350630	Hs1bp3	6.27757	2.11188	-1.57167
chr2	130953147	130971719	Hspa12b	3.06227	1.48547	-1.04368	chr2	130953147	130971719	Hspa12b	4.90273	1.9047	-1.36402
chr4	140976693	140981225	Hspb7	0.455398	2.10197	2.20654	chr4	140976693	140981225	Hspb7	1.66628	0.162272	-3.36014
chr4	118032603	118081868	Hyi	12.4335	9.45615	-0.394913	chr4	118032603	118081868	Hyi	96.961	32.0102	-1.59887
chr13	70727566	70776512	Ice1	13.9451	5.82341	-1.25983	chr13	70727566	70776512	Ice1	37.2966	14.893	-1.32441
chr6	115803545	115876717	Ift122	3.58604	4.88118	0.444836	chr6	115803545	115876717	Ift122	6.58931	2.57766	-1.35407
chr17	25153030	25236442	Ift140	4.82966	2.7705	-0.801772	chr17	25153030	25236442	Ift140	4.83109	1.44672	-1.73957
chr5	31555651	31593487	Ift172	6.72138	3.92361	-0.776577	chr5	31555651	31593487	Ift172	14.1449	5.61694	-1.33242
chr8	124945919	124947539	Il17c	1.41256	0.241482	-2.54832	chr8	124945919	124947539	Il17c	5.4502	0.422738	-3.68847
chr10	78037244	78047247	Ilvbl	14.8301	8.42529	-0.815734	chr10	78037244	78047247	Ilvbl	9.78232	4.16079	-1.23332
chr12	41750676	43056575	Immp2l	0.737953	5.2493	2.83052	chr12	41750676	43056575	Immp2l	1.70564	0.678838	-1.32917
chr1	138110098	138130857	Inava	1.66	0.93799	-0.823539	chr1	138110098	138130857	Inava	1.22511	0.447078	-1.45431
chr12	113826977	113853768	Inf2	74.2634	52.463	-0.501351	chr12	113826977	113853768	Inf2	106.068	49.9426	-1.08665
chr1	52846263	52874532	Inpp1	4.97862	7.13509	0.519184	chr1	52846263	52874532	Inpp1	7.95246	2.92831	-1.44133
chr7	108966826	108986740	Inppl1	84.8274	38.0067	-1.15828	chr7	108966826	108986740	Inppl1	75.8935	29.3149	-1.37234
chr5	140227235	140251632	Ints1	24.39	18.6818	-0.384658	chr5	140227235	140251632	Ints1	31.5309	11.568	-1.44663
chr3	90195301	90237558	Ints3	21.7383	20.0787	-0.11457	chr3	90195301	90237558	Ints3	21.3017	8.96817	-1.24808
chr4	48292631	48486335	Invs	2.94772	1.79897	-0.712431	chr4	48292631	48486335	Invs	2.09705	0.312635	-2.74581
chr6	113588460	113645020	Irak2	4.20255	2.93882	-0.516031	chr6	113588460	113645020	Irak2	3.13922	0.731191	-2.10209
chr7	148449081	148452323	Irf7	1.54801	0.727296	-1.0898	chr7	148449081	148452323	Irf7	3.20614	1.3408	-1.25774
chr10	128370868	128398044	Itga7	576.037	236.113	-1.28669	chr10	128370868	128398044	Itga7	770.123	274.415	-1.48873
chr6	108163089	108501110	Itpr1	3.81129	2.4271	-0.651042	chr6	108163089	108501110	Itpr1	5.84825	2.61164	-1.16305
chr19	47969079	47993813	Itprip	17.4542	18.0519	0.0485709	chr19	47969079	47993813	Itprip	22.5094	11.1342	-1.01552
chr2	118687729	118708645	Ivd	20.9415	12.2783	-0.770251	chr2	118687729	118708645	Ivd	26.1993	9.78708	-1.42058
chr12	114146800	114167706	Jag2	45.3186	18.8315	-1.26695	chr12	114146800	114167706	Jag2	82.6773	19.8617	-2.0575
chr13	44826142	45017012	Jarid2	6.45624	2.36133	-1.45109	chr13	44826142	45017012	Jarid2	4.70652	1.66972	-1.49506
chr11	104194814	104330757	Kansl1	23.1093	13.0818	-0.820917	chr11	104194814	104330757	Kansl1	58.1778	26.0088	-1.16147
chr19	45149730	45153779	Kazald1	2.27962	3.44286	0.594815	chr19	45149730	45153779	Kazald1	4.09852	1.71721	-1.25503
chr8	15011024	15033332	Kbtbd11	8.39476	4.10101	-1.03351	chr8	15011024	15033332	Kbtbd11	16.9618	6.73327	-1.33291
chr8	73367062	73387157	Kcnn1	1.00797	0.723451	-0.478478	chr8	73367062	73387157	Kcnn1	1.30202	0.228666	-2.50944
chr13	47138867	47201589	Kdm1b	5.49446	4.52035	-0.281544	chr13	47138867	47201589	Kdm1b	4.88037	1.30291	-1.90526
chr18	34936661	34999024	Kdm3b	20.0911	7.56113	-1.40988	chr18	34936661	34999024	Kdm3b	39.4023	13.4297	-1.55285
chr4	117809608	117852648	Kdm4a	27.046	15.0313	-0.847447	chr4	117809608	117852648	Kdm4a	31.2787	10.0204	-1.64224
chr7	132588133	132605782	Kdm8	6.20587	4.59227	-0.434426	chr7	132588133	132605782	Kdm8	5.76319	1.86414	-1.62836
chr5	31223931	31233621	Khk	1.37408	6.29847	2.19654	chr5	31223931	31233621	Khk	4.28168	1.25951	-1.76531
chr4	41337780	41411881	Kif24	2.50806	1.02911	-1.28517	chr4	41337780	41411881	Kif24	1.3687	0.536861	-1.35018
chr7	86805081	86859072	Kif7	16.5748	4.09375	-2.01749	chr7	86805081	86859072	Kif7	23.0448	5.3821	-2.0982
chr17	34012610	34027578	Kifc1	59.7204	56.9903	-0.0675059	chr17	34012610	34027578	Kifc1	32.6296	16.0364	-1.02483
chr8	97605100	97726726	Kifc3	20.1953	16.576	-0.284919	chr8	97605100	97726726	Kifc3	24.8382	11.1649	-1.15359
chr19	5107745	5118298	Klc2	12.9868	9.24531	-0.49025	chr19	5107745	5118298	Klc2	23.6002	6.85966	-1.78259
chr17	46767577	46783029	Klc4	6.20855	3.65477	-0.764478	chr17	46767577	46783029	Klc4	10.4102	3.67737	-1.50125
chr12	70342818	70384948	Klhdc1	2.56421	1.36774	-0.906728	chr12	70342818	70384948	Klhdc1	7.96106	0.842187	-3.24075
chr4	139518087	139523941	Klhdc7a	4.00809	2.32584	-0.785165	chr4	139518087	139523941	Klhdc7a	7.7375	2.13056	-1.86063
chrX	91480268	91518854	Klhl15	1.6884	1.48239	-0.187726	chrX	91480268	91518854	Klhl15	2.30224	0.42154	-2.4493
chr1	163018508	163061610	Klhl20	5.74203	7.2716	0.340712	chr1	163018508	163061610	Klhl20	7.37902	3.57037	-1.04736
chr12	66043426	66066523	Klhl28	1.84569	0.798428	-1.20892	chr12	66043426	66066523	Klhl28	2.36248	0.470851	-2.32696
chr6	38576659	38587239	Klrg2	2.44692	0.478129	-2.3555	chr6	38576659	38587239	Klrg2	1.26814	0.200739	-2.65932
chr7	16705224	16712865	Kptn	8.68028	5.04678	-0.782379	chr7	16705224	16712865	Kptn	17.083	6.25235	-1.45009
chr9	21069728	21092413	Kri1	32.8984	12.6854	-1.37484	chr9	21069728	21092413	Kri1	55.1464	21.0023	-1.39272
chr10	7401006	7436259	Lats1	15.5934	10.7401	-0.537929	chr10	7401006	7436259	Lats1	47.8751	19.503	-1.29558
chr8	108463450	108467302	Lcat	5.43586	2.36046	-1.20344	chr8	108463450	108467302	Lcat	49.6106	15.4885	-1.67945
chr4	129225587	129250885	Lck	1.91256	0.872356	-1.13252	chr4	129225587	129250885	Lck	1.28128	0.446738	-1.52009
chr2	120963027	120982416	Lcmt2	4.32329	7.32529	0.760756	chr2	120963027	120982416	Lcmt2	11.1323	4.73592	-1.23304
chr7	3596870	3629155	Leng1	7.54944	7.97308	0.0787689	chr7	3596870	3629155	Leng1	11.0433	4.24512	-1.37929
chr13	12531668	12554005	Lgals8	40.9775	20.1422	-1.02461	chr13	12531668	12554005	Lgals8	60.1669	28.9503	-1.05539
chr7	139802325	139898102	Lhpp	0.747726	6.80661	3.18635	chr7	139802325	139898102	Lhpp	1.87721	0.895263	-1.0682
chr5	135131908	135164460	Limk1	7.49366	5.07201	-0.563114	chr5	135131908	135164460	Limk1	13.3021	5.08586	-1.38709
chr7	31337558	31344665	Lin37	16.7298	21.1877	0.340808	chr7	31337558	31344665	Lin37	17.7637	7.26388	-1.29012
chr7	73834774	73862142	Lins1	4.3803	2.15372	-1.0242	chr7	73834774	73862142	Lins1	7.56878	2.94158	-1.36347
chr7	26161837	26351436	Lipe	4.41124	2.00135	-1.14021	chr7	26161837	26351436	Lipe	3.17514	0.383258	-3.05043
chr11	60513191	60540765	Llgl1	26.2239	23.0206	-0.187955	chr11	60513191	60540765	Llgl1	31.209	14.8564	-1.07088
chr11	115685371	115717094	Llgl2	1.37853	0.677621	-1.02458	chr11	115685371	115717094	Llgl2	2.46103	0.807423	-1.60787
chr5	29556341	29704930	Lmbr1	2.52844	1.56213	-0.694736	chr5	29556341	29704930	Lmbr1	2.21052	0.9199	-1.26484
chr10	80364107	80380990	Lmnb2	111.688	61.2805	-0.865981	chr10	80364107	80380990	Lmnb2	67.2383	28.7212	-1.22717
chr8	72346463	72355001	Lpar2	2.46664	1.00017	-1.3023	chr8	72346463	72355001	Lpar2	1.67914	0.263814	-2.67013
chr2	160706405	160731736	Lpin3	57.218	39.6752	-0.528232	chr2	160706405	160731736	Lpin3	104.577	44.8708	-1.22072
chr14	75154479	75347684	Lrch1	10.047	5.67355	-0.824439	chr14	75154479	75347684	Lrch1	15.4937	7.59275	-1.02899
chr9	77278629	77392659	Lrrc1	3.34948	4.78598	0.514876	chr9	77278629	77392659	Lrrc1	3.00679	1.21776	-1.304
chr7	73403632	73533227	Lrrk1	15.8001	12.1071	-0.384073	chr7	73403632	73533227	Lrrk1	22.4275	9.95103	-1.17235
chr5	136598935	136611944	Lrwd1	28.5258	38.5972	0.436228	chr5	136598935	136611944	Lrwd1	41.9313	13.7444	-1.60918
chr19	5740899	5771419	Ltbp3	54.6169	33.8419	-0.690537	chr19	5740899	5771419	Ltbp3	85.3867	36.1434	-1.24028
chr7	28090159	28122631	Ltbp4	34.9413	13.472	-1.37498	chr7	28090159	28122631	Ltbp4	123.935	35.8813	-1.78828
chr16	17508775	17526426	Lztr1	36.0646	24.1251	-0.580048	chr16	17508775	17526426	Lztr1	53.0837	23.286	-1.18881
chr8	87607167	87622638	Man2b1	13.8576	8.89869	-0.639016	chr8	87607167	87622638	Man2b1	16.2942	6.63607	-1.29596
chr9	56977788	56990017	Man2c1os	1.10711	0.796753	-0.474594	chr9	56977788	56990017	Man2c1os	2.83911	0.627193	-2.17846
chr8	128193717	128197265	Map10	1.1374	0.934588	-0.283333	chr8	128193717	128197265	Map10	1.64434	0.313663	-2.39022
chr8	73429872	73441428	Map1s	47.1892	37.1448	-0.345294	chr8	73429872	73441428	Map1s	58.2428	24.2711	-1.26284
chr9	63011574	63225709	Map2k5	9.74395	12.0522	0.306722	chr9	63011574	63225709	Map2k5	10.9126	3.82857	-1.51112
chr19	5689130	5702864	Map3k11	23.665	17.9161	-0.401499	chr19	5689130	5702864	Map3k11	39.452	13.8458	-1.51065
chr4	132796732	132808843	Map3k6	7.32396	5.56823	-0.395404	chr4	132796732	132808843	Map3k6	27.6248	11.3407	-1.28445
chr17	80979852	81127365	Map4k3	8.76873	4.7338	-0.88937	chr17	80979852	81127365	Map4k3	15.2535	7.08669	-1.10596
chr17	28906261	28915649	Mapk13	3.91584	9.61719	1.2963	chr17	28906261	28915649	Mapk13	95.107	43.6469	-1.12367
chr11	61302313	61307768	Mapk7	31.1244	17.2509	-0.851373	chr11	61302313	61307768	Mapk7	53.9004	21.6891	-1.31332
chr2	48669628	49172589	Mbd5	2.22783	1.67585	-0.410747	chr2	48669628	49172589	Mbd5	12.6655	5.02328	-1.3342
chr11	120404201	120411041	Mcrip1	35.8047	44.1307	0.301634	chr11	120404201	120411041	Mcrip1	62.4385	27.8104	-1.16681
chr8	122284486	122302316	Meak7	2.73146	1.93105	-0.500284	chr8	122284486	122302316	Meak7	4.23616	1.76253	-1.26511
chrX	98469429	98494273	Med12	10.6467	5.96316	-0.836263	chrX	98469429	98494273	Med12	18.6828	7.9328	-1.23581
chr10	24589791	24633335	Med23	17.0518	7.62968	-1.16023	chr10	24589791	24633335	Med23	17.2042	7.40761	-1.21568
chr7	16760743	16771857	Meis3	10.3418	8.20475	-0.333962	chr7	16760743	16771857	Meis3	15.3324	5.8138	-1.39903
chr5	138223133	138227929	Mepce	32.2043	27.2533	-0.240824	chr5	138223133	138227929	Mepce	72.3328	31.2767	-1.20956
chr14	52504516	52511543	Mettl17	16.4346	13.4232	-0.292014	chr14	52504516	52511543	Mettl17	27.4124	8.88491	-1.6254
chr10	105200240	105278436	Mettl25	2.16467	2.23036	0.0431271	chr10	105200240	105278436	Mettl25	3.39176	0.917381	-1.88644
chr14	52881433	52924799	Mettl3	17.4114	20.4791	0.234118	chr14	52881433	52924799	Mettl3	20.6531	9.55671	-1.11177
chr6	122463601	122479305	Mfap5	0.986668	1.96129	0.991166	chr6	122463601	122479305	Mfap5	3.11578	0.669508	-2.21842
chr11	116715075	116736951	Mfsd11	31.6392	15.5738	-1.02259	chr11	116715075	116736951	Mfsd11	30.0582	13.2156	-1.18551
chr19	46431369	46449744	Mfsd13a	1.69475	0.976269	-0.795723	chr19	46431369	46449744	Mfsd13a	2.06203	0.200935	-3.35927
chr5	140182646	140212287	Micall2	42.888	27.7621	-0.627457	chr5	140182646	140212287	Micall2	86.4565	39.1895	-1.14151
chr10	79002989	79017873	Mier2	33.7797	11.224	-1.58957	chr10	79002989	79017873	Mier2	44.3517	14.4707	-1.61586
chr11	115465453	115474283	Mif4gd	10.8057	13.172	0.28569	chr11	115465453	115474283	Mif4gd	17.5558	6.84246	-1.35936
chr6	55153376	55270216	Mindy4	1.36881	1.3102	-0.0631287	chr6	55153376	55270216	Mindy4	4.20212	0.868009	-2.27533
chr6	8159226	8186273	Mios	8.09848	6.15515	-0.395857	chr6	8159226	8186273	Mios	13.6744	5.88223	-1.21704
chr16	77329572	77558673	Mir99ahg	1.15537	0.143858	-3.00564	chr16	77329572	77558673	Mir99ahg	4.64302	0.566954	-3.03376
chr4	155024763	155027493	Mmp23	2.59626	3.4438	0.407569	chr4	155024763	155027493	Mmp23	2.30878	0.881662	-1.38883
chr9	107790459	107805470	Mon1a	10.1516	7.06832	-0.522272	chr9	107790459	107805470	Mon1a	20.4469	5.31822	-1.94287
chr16	93832365	93876318	Morc3	38.4624	16.7395	-1.20019	chr16	93832365	93876318	Morc3	45.1844	19.5187	-1.21097
chr17	8476651	8520307	Mpc1	1.61337	11.6424	2.85124	chr17	8476651	8520307	Mpc1	2.62756	1.0745	-1.29006
chr18	7347959	7626861	Mpp7	2.21472	2.55095	0.203911	chr18	7347959	7626861	Mpp7	3.06099	0.654239	-2.22611
chr8	86774474	86781223	Mri1	14.888	22.1334	0.57208	chr8	86774474	86781223	Mri1	18.1352	8.16764	-1.1508
chr1	42908077	42962528	Mrps9	31.1347	51.6131	0.729212	chr1	42908077	42962528	Mrps9	34.5908	14.3742	-1.26691
chr15	80808194	81021166	Mrtfa	13.8884	7.34807	-0.918447	chr15	80808194	81021166	Mrtfa	19.5318	8.75193	-1.15815
chr17	35165549	35183690	Msh5	1.88159	0.830125	-1.18055	chr17	35165549	35183690	Msh5	11.0067	3.59537	-1.61416
chrX	68617934	68672371	Mtmr1	6.96883	3.22109	-1.11336	chrX	68617934	68672371	Mtmr1	10.064	3.88553	-1.37302
chr3	95965892	95975641	Mtmr11	9.67291	3.60446	-1.42417	chr3	95965892	95975641	Mtmr11	20.834	6.39857	-1.70312
chr19	5482560	5488379	Mus81	20.0436	11.8812	-0.754459	chr19	5482560	5488379	Mus81	24.9695	7.31081	-1.77206
chr4	116480338	116492036	Mutyh	8.54426	6.06339	-0.494831	chr4	116480338	116492036	Mutyh	8.93906	3.31958	-1.42912
chr8	124957495	124967322	Mvd	6.29649	9.59885	0.608314	chr8	124957495	124967322	Mvd	5.16568	1.08131	-2.25618
chr5	114894277	114910599	Mvk	4.7324	11.2495	1.24921	chr5	114894277	114910599	Mvk	8.52516	3.36793	-1.33987
chr5	34519228	34530359	Mxd4	10.9985	6.82886	-0.687585	chr5	34519228	34530359	Mxd4	10.0122	3.47885	-1.52507
chr4	155213788	155218211	Mxra8	72.9996	63.8716	-0.192712	chr4	155213788	155218211	Mxra8	151.408	62.5761	-1.27476
chr10	106929904	106931779	Myf6	2.68359	3.7794	0.493993	chr10	106929904	106931779	Myf6	2.90233	0.605935	-2.25998
chr7	51861172	51933605	Myh14	1.17076	1.32033	0.173453	chr7	51861172	51933605	Myh14	1.23715	0.334787	-1.88571
chr10	127931212	127935741	Myl6b	4.4966	12.1409	1.43297	chr10	127931212	127935741	Myl6b	1.61363	0.2577	-2.64655
chr11	75464020	75488136	Myo1c	60.4575	64.5028	0.0934425	chr11	75464020	75488136	Myo1c	90.5042	41.8503	-1.11275
chr7	105199563	105268003	Myo7a	2.4434	0.928573	-1.3958	chr7	105199563	105268003	Myo7a	3.21409	0.711077	-2.17633
chr15	75721393	75724911	Naprt	2.47453	2.59664	0.0694894	chr15	75721393	75724911	Naprt	3.97848	1.36849	-1.53963
chr2	103561414	103601427	Nat10	34.6687	18.5578	-0.901603	chr2	103561414	103601427	Nat10	38.3802	15.8166	-1.27893
chr9	26837759	26902900	Ncapd3	6.81926	9.47179	0.474022	chr9	26837759	26902900	Ncapd3	7.71423	3.82938	-1.01041
chr2	164825856	164860279	Ncoa5	34.6346	18.6817	-0.890588	chr2	164825856	164860279	Ncoa5	34.1572	15.1184	-1.17588
chr14	52524945	52533679	Ndrg2	11.6716	13.4495	0.204546	chr14	52524945	52533679	Ndrg2	10.7606	3.41357	-1.6564
chr8	98200873	98238856	Ndrg4	10.7434	6.21052	-0.790659	chr8	98200873	98238856	Ndrg4	9.78226	4.75301	-1.04133
chr14	21542951	21553784	Ndst2	12.4775	6.74956	-0.886466	chr14	21542951	21553784	Ndst2	31.753	13.9486	-1.18677
chr11	77979607	77990168	Nek8	16.7063	5.18655	-1.68754	chr11	77979607	77990168	Nek8	32.7571	10.0265	-1.70798
chr13	53062577	53076408	Nfil3	18.5557	21.0613	0.182736	chr13	53062577	53076408	Nfil3	20.612	9.59727	-1.10279
chr7	87406100	87410264	Ngrn	20.2399	22.8809	0.17694	chr7	87406100	87410264	Ngrn	21.2936	6.80691	-1.64535
chr13	47107925	47110219	Nhlrc1	0.151051	1.19103	2.9791	chr13	47107925	47110219	Nhlrc1	2.21352	0.703437	-1.65385
chr3	53255917	53267180	Nhlrc3	1.17869	1.23815	0.0710001	chr3	53255917	53267180	Nhlrc3	2.35604	1.08321	-1.12105
chr11	4773953	4794204	Nipsnap1	7.21431	7.80509	0.113554	chr11	4773953	4794204	Nipsnap1	7.16811	3.28312	-1.12653
chr9	44060795	44076682	Nlrx1	3.74664	2.99816	-0.321523	chr9	44060795	44076682	Nlrx1	2.41004	1.16832	-1.04462
chr2	157382097	157392097	Nnat	1.10678	1.19171	0.106668	chr2	157382097	157392097	Nnat	4.33442	1.54739	-1.486
chr9	48399981	48413228	Nnmt	2.19816	9.7827	2.15394	chr9	48399981	48413228	Nnmt	2.46782	0.632957	-1.96306
chr19	38862617	38893727	Noc3l	11.4886	9.2976	-0.305275	chr19	38862617	38893727	Noc3l	15.517	7.14647	-1.11854
chr6	54873935	54922606	Nod1	7.95732	3.36263	-1.24269	chr6	54873935	54922606	Nod1	20.0305	6.51254	-1.62091
chr18	22851655	23200182	Nol4	2.60415	1.79278	-0.538615	chr18	22851655	23200182	Nol4	10.4713	2.87049	-1.86707
chr11	120515102	120522151	Notum	1.3911	0.428141	-1.70007	chr11	120515102	120522151	Notum	4.38476	0.578968	-2.92094
chr9	53345151	53383732	Npat	8.27137	4.93785	-0.744242	chr9	53345151	53383732	Npat	6.88655	2.94651	-1.22478
chr15	102354269	102355052	Npff	7.62047	2.59441	-1.55448	chr15	102354269	102355052	Npff	33.4531	1.89111	-4.14483
chr7	51804985	51809335	Nr1h2	28.7911	25.1132	-0.197174	chr7	51804985	51809335	Nr1h2	63.1629	28.8917	-1.12842
chr2	91024217	91035273	Nr1h3	2.33951	1.74681	-0.421486	chr2	91024217	91035273	Nr1h3	7.32789	1.09825	-2.73819
chr10	66729436	66748029	Nrbf2	8.80274	7.59911	-0.212123	chr10	66729436	66748029	Nrbf2	5.65218	2.24529	-1.33191
chr4	6323353	6381418	Nsmaf	16.5528	12.5315	-0.401523	chr4	6323353	6381418	Nsmaf	30.8233	12.5906	-1.29167
chr2	14912070	14976499	Nsun6	2.72806	0.769358	-1.82615	chr2	14912070	14976499	Nsun6	5.15523	1.38459	-1.89657
chr10	34023414	34138357	Nt5dc1	4.70953	5.37189	0.189847	chr10	34023414	34138357	Nt5dc1	2.79761	1.18611	-1.23796
chr10	93103793	93208717	Ntn4	5.66967	10.9585	0.950713	chr10	93103793	93208717	Ntn4	9.17215	3.03878	-1.59377
chr3	96500297	96512483	Nudt17	0.255792	1.38788	2.43983	chr3	96500297	96512483	Nudt17	1.53361	0.390773	-1.97253
chr2	5715339	5789782	Nudt5	17.8711	31.2607	0.806721	chr2	5715339	5789782	Nudt5	19.8701	8.65379	-1.19919
chr8	116657473	116676212	Nudt7	11.8183	8.83934	-0.419009	chr8	116657473	116676212	Nudt7	5.82412	2.88529	-1.01333
chr12	85134983	85262884	Numb	12.5623	5.47933	-1.19703	chr12	85134983	85262884	Numb	16.6268	7.13257	-1.22101
chrX	45265632	45319043	Ocrl	9.55327	4.73182	-1.0136	chrX	45265632	45319043	Ocrl	19.6518	5.9125	-1.73282
chrX	162827964	162878636	Ofd1	4.22311	4.11704	-0.036698	chrX	162827964	162878636	Ofd1	4.76542	2.29727	-1.05268
chr15	76124801	76137719	Oplah	3.69287	1.02363	-1.85105	chr15	76124801	76137719	Oplah	4.75054	0.550152	-3.11019
chr7	150874666	150927868	Osbpl5	27.1159	21.7568	-0.31767	chr7	150874666	150927868	Osbpl5	58.7706	29.3078	-1.00381
chr11	96912133	96930218	Osbpl7	6.08296	2.4426	-1.31636	chr11	96912133	96930218	Osbpl7	10.2815	3.38465	-1.60297
chr2	163231557	163245206	Oser1	14.2296	14.9807	0.0742095	chr2	163231557	163245206	Oser1	15.606	6.0267	-1.37266
chr1	53370467	53383186	Osgepl1	2.6205	6.49302	1.30905	chr1	53370467	53383186	Osgepl1	4.98802	1.38311	-1.85055
chr12	104615103	104644560	Otub2	5.33333	3.9231	-0.443043	chr12	104615103	104644560	Otub2	3.50168	1.67999	-1.0596
chrX	7418956	7453752	Otud5	30.1565	22.0611	-0.450967	chrX	7418956	7453752	Otud5	57.8021	25.5333	-1.17874
chr4	118905519	118921582	P3h1	13.808	13.5875	-0.0232196	chr4	118905519	118921582	P3h1	18.442	8.57043	-1.10556
chr6	124791106	124807735	P3h3	16.1843	8.83733	-0.872909	chr6	124791106	124807735	P3h3	32.9674	15.1637	-1.12041
chr5	48763630	48779995	Pacrgl	2.28954	7.67869	1.7458	chr5	48763630	48779995	Pacrgl	3.81357	1.49899	-1.34715
chr7	26080067	26083005	Pafah1b3	12.7371	38.5882	1.59913	chr7	26080067	26083005	Pafah1b3	7.88487	3.21206	-1.29559
chr4	133952234	133983327	Pafah2	15.1603	5.86174	-1.3709	chr4	133952234	133983327	Pafah2	26.3528	9.89951	-1.41253
chr10	60782404	60846271	Pald1	20.6664	13.7356	-0.589367	chr10	60782404	60846271	Pald1	31.109	15.4923	-1.00578
chr11	23762645	23795270	Papolg	6.25467	3.0223	-1.04929	chr11	23762645	23795270	Papolg	3.66567	1.75031	-1.06646
chr1	20880628	20929731	Paqr8	3.08159	2.43395	-0.340376	chr1	20880628	20929731	Paqr8	1.91356	0.850427	-1.17
chr16	35832963	35871468	Parp14	1.45633	0.787378	-0.887207	chr16	35832963	35871468	Parp14	2.24606	1.05679	-1.08771
chr6	72382790	72390609	Particl	0.341208	1.12676	1.72345	chr6	72382790	72390609	Particl	5.55896	1.58036	-1.81456
chr1	95202540	95239365	Pask	4.49791	2.27962	-0.98046	chr1	95202540	95239365	Pask	3.16282	1.55742	-1.02205
chr4	139293995	139388883	Pax7	17.1185	13.1171	-0.384108	chr4	139293995	139388883	Pax7	46.3207	14.5915	-1.66653
chr2	25315007	25316614	Paxx	5.4775	2.8221	-0.95675	chr2	25315007	25316614	Paxx	4.33315	1.94227	-1.15767
chr10	76224598	76424692	Pcbp3	9.74953	8.99207	-0.116679	chr10	76224598	76424692	Pcbp3	8.17553	3.07355	-1.4114
chr18	37089938	38001526	Pcdhga7	0.299684	1.1244	1.90764	chr18	37089938	38001526	Pcdhga7	1.13733	0.385443	-1.56106
chr18	37089938	38001526	Pcdhgc5	3.98458	3.57479	-0.156568	chr18	37089938	38001526	Pcdhgc5	4.4285	2.12406	-1.05999
chr2	130243419	130270005	Pced1a	11.3158	5.20934	-1.11917	chr2	130243419	130270005	Pced1a	28.6611	12.4343	-1.20476
chr6	83028383	83030849	Pcgf1	13.0531	10.8494	-0.266775	chr6	83028383	83030849	Pcgf1	19.9155	7.37115	-1.43393
chr8	13077524	13105343	Pcid2	13.2924	12.4962	-0.0891127	chr8	13077524	13105343	Pcid2	15.3344	7.29143	-1.0725
chr10	79784027	79792218	Pcsk4	1.82959	0.99078	-0.884887	chr10	79784027	79792218	Pcsk4	2.98047	1.44633	-1.04314
chr11	89843857	89864208	Pctp	5.81801	3.58614	-0.698095	chr11	89843857	89864208	Pctp	3.96143	1.90243	-1.05818
chr19	47165255	47205635	Pdcd11	25.6688	17.1729	-0.579881	chr19	47165255	47205635	Pdcd11	38.2751	18.0094	-1.08766
chr9	20970157	21017692	Pde4a	5.39312	2.08197	-1.37317	chr9	20970157	21017692	Pde4a	6.5944	2.26886	-1.53928
chr7	88358150	88479421	Pde8a	2.29411	2.12291	-0.111887	chr7	88358150	88479421	Pde8a	7.97862	3.79587	-1.07171
chr16	35397397	35490959	Pdia5	5.84081	10.6388	0.865095	chr16	35397397	35490959	Pdia5	4.16518	1.43163	-1.54072
chr13	55598847	55614807	Pdlim7	71.6178	85.925	0.262759	chr13	55598847	55614807	Pdlim7	100.978	48.5524	-1.05642
chr2	152834625	152841119	Pdrg1	45.4297	46.006	0.018186	chr2	152834625	152841119	Pdrg1	58.4559	29.1004	-1.00631
chrX	71038695	71070308	Pdzd4	6.08882	2.463	-1.30575	chrX	71038695	71070308	Pdzd4	2.87914	0.547469	-2.39479
chr3	87553018	87572875	Pear1	1.62362	1.07015	-0.601404	chr3	87553018	87572875	Pear1	8.22401	4.09248	-1.00686
chr7	6658670	6683130	Peg3os	21.2973	10.9358	-0.961615	chr7	6658670	6683130	Peg3os	23.4268	8.85203	-1.40408
chr14	48740543	48880558	Peli2	1.19219	0.818276	-0.54296	chr14	48740543	48880558	Peli2	1.01289	0.403399	-1.32819
chr11	83108576	83112479	Pex12	2.65217	4.40066	0.730543	chr11	83108576	83112479	Pex12	4.93053	1.79437	-1.45826
chr2	92214832	92221377	Pex16	6.92741	5.99358	-0.208898	chr2	92214832	92221377	Pex16	10.7707	2.41152	-2.1591
chr17	46848424	46862492	Pex6	31.3749	14.4783	-1.11572	chr17	46848424	46862492	Pex6	31.4637	14.2828	-1.1394
chr13	21513143	21545596	Pgbd1	1.09324	0.611753	-0.837585	chr13	21513143	21545596	Pgbd1	1.08822	0.426372	-1.35178
chr7	148127289	148133563	Pgghg	8.61228	5.26912	-0.708833	chr7	148127289	148133563	Pgghg	10.7877	3.84087	-1.48988
chr2	34749274	34769496	Phf19	4.41976	3.60902	-0.292361	chr2	34749274	34769496	Phf19	3.62514	1.52117	-1.25286
chrX	156940093	157036810	Phka2	13.8447	6.46259	-1.09915	chrX	156940093	157036810	Phka2	15.2711	5.80969	-1.39427
chr9	44494390	44543281	Phldb1	38.2204	20.5974	-0.891881	chr9	44494390	44543281	Phldb1	94.8975	34.1572	-1.47418
chr7	148414686	148448650	Phrf1	39.0159	17.5496	-1.15262	chr7	148414686	148448650	Phrf1	49.4025	19.5997	-1.33375
chr3	94778652	94819379	Pi4kb	28.747	14.7784	-0.959924	chr3	94778652	94819379	Pi4kb	27.715	11.2035	-1.30671
chr8	125000042	125075229	Piezo1	39.5136	28.4551	-0.473664	chr8	125000042	125075229	Piezo1	58.9559	23.7423	-1.31218
chrX	160857711	160871847	Piga	10.5333	4.92596	-1.09648	chrX	160857711	160871847	Piga	8.7367	3.30294	-1.40334
chr17	26063364	26078934	Pigq	42.5237	32.8284	-0.373322	chr17	26063364	26078934	Pigq	56.2915	25.3313	-1.15199
chr4	149023276	149075738	Pik3cd	2.69262	1.57203	-0.77638	chr4	149023276	149075738	Pik3cd	3.10956	1.30505	-1.25261
chr11	3230733	3242974	Pik3ip1	2.4976	0.804196	-1.63492	chr11	3230733	3242974	Pik3ip1	3.25122	0.92587	-1.8121
chr10	80755707	80782719	Pip5k1c	17.0687	11.8038	-0.532099	chr10	80755707	80782719	Pip5k1c	21.116	9.87612	-1.09632
chr11	3024004	3100655	Pisd-ps3	20.0973	1.8209	-3.46427	chr11	3024004	3100655	Pisd-ps3	30.3534	0.102309	-8.21279
chr19	4099997	4125858	Pitpnm1	37.3371	12.8393	-1.54004	chr19	4099997	4125858	Pitpnm1	60.8616	17.1477	-1.82752
chr17	23863302	23877297	Pkmyt1	51.9903	22.6812	-1.19674	chr17	23863302	23877297	Pkmyt1	38.0004	16.3032	-1.22086
chr8	108674253	108688618	Pla2g15	13.8804	6.66846	-1.05762	chr8	108674253	108688618	Pla2g15	6.80059	1.83375	-1.89086
chr9	118980645	119002620	Plcd1	9.3196	4.4949	-1.05198	chr9	118980645	119002620	Plcd1	20.5921	8.93126	-1.20515
chr12	79989683	80007925	Plek2	3.87132	2.64724	-0.548334	chr12	79989683	80007925	Plek2	3.83369	0.466661	-3.03829
chr7	52781699	52809599	Plekha4	1.70195	0.864084	-0.977941	chr7	52781699	52809599	Plekha4	4.87038	0.597589	-3.02681
chr7	29144622	29157681	Plekhg2	18.3003	6.70959	-1.44758	chr7	29144622	29157681	Plekhg2	23.3146	7.83191	-1.5738
chr8	107897171	107937402	Plekhg4	2.90063	0.529886	-2.45261	chr8	107897171	107937402	Plekhg4	3.24805	0.454823	-2.8362
chr9	92352215	92387354	Plscr4	3.82619	2.11438	-0.855671	chr9	92352215	92387354	Plscr4	3.2559	1.16661	-1.48074
chr10	94253610	94407479	Plxnc1	1.02684	0.646186	-0.668187	chr10	94253610	94407479	Plxnc1	1.05783	0.291331	-1.86038
chr6	115904828	115945023	Plxnd1	35.7235	25.9318	-0.46215	chr6	115904828	115945023	Plxnd1	87.1455	34.2702	-1.34647
chr9	58064986	58097593	Pml	34.8349	16.2888	-1.09665	chr9	58064986	58097593	Pml	40.5178	18.3565	-1.14226
chr2	26244867	26264739	Pmpca	43.7008	57.4349	0.394268	chr2	26244867	26264739	Pmpca	74.6504	34.7164	-1.10453
chr7	52112515	52118299	Pnkp	16.8733	16.2189	-0.0570587	chr7	52112515	52118299	Pnkp	26.4747	9.70498	-1.44781
chr12	85487080	85489439	Pnma1	3.46918	2.44586	-0.504253	chr12	85487080	85489439	Pnma1	2.10758	0.871592	-1.27386
chr2	24831552	24909592	Pnpla7	5.78964	2.5112	-1.2051	chr2	24831552	24909592	Pnpla7	7.76504	2.70109	-1.52345
chr12	45370140	45414422	Pnpla8	4.13481	6.42009	0.634772	chr12	45370140	45414422	Pnpla8	8.24468	3.20979	-1.36098
chr6	88792551	88825038	Podxl2	0.655333	1.86942	1.51229	chr6	88792551	88825038	Podxl2	4.62866	2.09255	-1.14533
chr7	51788113	51804185	Pold1	38.2086	29.1816	-0.38884	chr7	51788113	51804185	Pold1	25.3658	11.7876	-1.10562
chr12	70302765	70329177	Pole2	9.62637	21.259	1.14301	chr12	70302765	70329177	Pole2	10.1195	4.07964	-1.31062
chr19	45626765	45635054	Poll	12.6189	8.56762	-0.558623	chr19	45626765	45635054	Poll	15.4549	7.66745	-1.01125
chr3	96515817	96531362	Polr3c	19.772	14.7118	-0.426484	chr3	96515817	96531362	Polr3c	21.8021	6.32645	-1.785
chr14	70838554	70843278	Polr3d	26.0864	21.0442	-0.309876	chr14	70838554	70843278	Polr3d	39.6487	17.5402	-1.17661
chr2	144353480	144367515	Polr3f	8.95233	5.79122	-0.628394	chr2	144353480	144367515	Polr3f	6.94927	3.25257	-1.09528
chr10	79198869	79209326	Polrmt	19.615	15.4226	-0.346911	chr10	79198869	79209326	Polrmt	19.2597	9.04346	-1.09064
chr9	121890723	121905144	Pomgnt2	3.14559	3.97526	0.33772	chr9	121890723	121905144	Pomgnt2	5.1407	1.83225	-1.48835
chr12	88447810	88505673	Pomt2	8.34734	6.05545	-0.463083	chr12	88447810	88505673	Pomt2	11.4651	5.538	-1.04982
chr3	54163188	54194963	Postn	0.238058	1.06461	2.16094	chr3	54163188	54194963	Postn	1.05605	0.431092	-1.29261
chr9	106097283	106101564	Ppm1m	7.23894	10.1812	0.492057	chr9	106097283	106101564	Ppm1m	11.633	3.65918	-1.66864
chr1	173207122	173211317	Ppox	16.4665	7.60356	-1.11479	chr1	173207122	173211317	Ppox	38.7851	14.7894	-1.39094
chr5	122608283	122625282	Ppp1cc	20.6232	25.4824	0.305234	chr5	122608283	122625282	Ppp1cc	22.0568	10.3613	-1.09002
chr12	113066668	113146266	Ppp1r13b	3.70842	2.79205	-0.409479	chr12	113066668	113146266	Ppp1r13b	6.03726	2.26979	-1.41134
chr7	19946564	19963882	Ppp1r13l	8.97476	8.66122	-0.0513033	chr7	19946564	19963882	Ppp1r13l	25.5896	11.377	-1.16943
chr17	36002539	36012541	Ppp1r18	50.0744	49.923	-0.00436799	chr17	36002539	36012541	Ppp1r18	78.1745	38.0193	-1.03997
chr7	20116315	20147747	Ppp1r37	22.3499	15.884	-0.492701	chr7	20116315	20147747	Ppp1r37	28.1964	9.33121	-1.59537
chr19	6226400	6235840	Ppp2r5b	8.64682	7.38706	-0.227169	chr19	6226400	6235840	Ppp2r5b	18.1431	8.1647	-1.15195
chr8	37157881	37210841	Prag1	3.67696	2.51552	-0.547654	chr8	37157881	37210841	Prag1	2.18646	0.995367	-1.1353
chr6	65728955	65886984	Prdm5	14.9316	6.70507	-1.15505	chr6	65728955	65886984	Prdm5	17.0642	6.44642	-1.40441
chr17	85427686	85489614	Prepl	10.652	5.89514	-0.853529	chr17	85427686	85489614	Prepl	20.9813	8.78008	-1.2568
chr2	166390021	166539332	Prex1	9.67152	10.5553	0.126155	chr2	166390021	166539332	Prex1	13.2245	4.35879	-1.60121
chr15	98643227	98661939	Prkag1	52.7491	62.0847	0.235092	chr15	98643227	98661939	Prkag1	104.353	41.87	-1.31748
chr14	31408539	31439394	Prkcd	16.9269	11.4891	-0.559047	chr14	31408539	31439394	Prkcd	37.5115	14.3606	-1.38522
chr7	3303657	3331154	Prkcg	2.28487	0.260153	-3.13468	chr7	3303657	3331154	Prkcg	2.80121	0.0821618	-5.09144
chr12	51442218	51750210	Prkd1	4.91882	2.83816	-0.793357	chr12	51442218	51750210	Prkd1	4.7107	1.91739	-1.2968
chr7	17428250	17455810	Prkd2	4.89857	4.19	-0.225411	chr7	17428250	17455810	Prkd2	6.44008	2.11424	-1.60694
chr8	108734953	108775594	Prmt7	23.7516	41.2855	0.797608	chr8	108734953	108775594	Prmt7	30.5778	10.7965	-1.50192
chr16	18071818	18089283	Prodh	9.66447	8.04282	-0.264989	chr16	18071818	18089283	Prodh	29.6945	12.7576	-1.21884
chr13	34967362	34994747	Prpf4b	21.8101	14.9191	-0.547838	chr13	34967362	34994747	Prpf4b	18.8425	8.48601	-1.15083
chr11	61543151	61575590	Prpsap2	15.7818	24.9213	0.659117	chr11	61543151	61575590	Prpsap2	20.5035	9.89871	-1.05056
chr8	108424373	108455702	Pskh1	8.55398	10.2474	0.260588	chr8	108424373	108455702	Pskh1	7.72254	3.41053	-1.17908
chr18	78031997	78121618	Pstpip2	4.81669	2.19292	-1.13519	chr18	78031997	78121618	Pstpip2	1.37115	0.509788	-1.42741
chr6	71830631	71858756	Ptcd3	36.2033	34.8187	-0.0562571	chr6	71830631	71858756	Ptcd3	46.2023	19.0401	-1.27892
chr15	73553574	73589196	Ptp4a3	55.7297	82.9145	0.573177	chr15	73553574	73589196	Ptp4a3	322.696	150.471	-1.10069
chr9	110287592	110310714	Ptpn23	33.1105	21.6538	-0.612664	chr9	110287592	110310714	Ptpn23	59.8078	24.8447	-1.2674
chr4	57203712	57314709	Ptpn3	3.30489	1.60707	-1.04017	chr4	57203712	57314709	Ptpn3	4.25936	1.91159	-1.15586
chr7	142729506	142877977	Ptpre	2.59703	1.02747	-1.33777	chr7	142729506	142877977	Ptpre	2.7211	0.891807	-1.60939
chr4	131324371	131394193	Ptpru	3.14151	1.50979	-1.05711	chr4	131324371	131394193	Ptpru	9.24066	3.19089	-1.53404
chr15	94353070	94373938	Pus7l	7.58648	7.37494	-0.0408	chr15	94353070	94373938	Pus7l	18.155	8.49971	-1.09488
chr14	8930724	8997631	Pxk	7.08739	7.09877	0.00231457	chr14	8930724	8997631	Pxk	6.82587	3.27113	-1.06122
chr14	52881433	52924799	Rab2b	3.92393	3.76124	-0.061089	chr14	52881433	52924799	Rab2b	4.72606	1.71111	-1.4657
chr19	10076158	10112870	Rab3il1	3.53191	4.05567	0.199491	chr19	10076158	10112870	Rab3il1	1.77835	0.644162	-1.46504
chr14	56334702	56341100	Rabggta	21.4784	10.8594	-0.983945	chr14	56334702	56341100	Rabggta	41.4417	13.6207	-1.60528
chr15	89412957	89422354	Rabl2	10.5518	8.92649	-0.241323	chr15	89412957	89422354	Rabl2	12.3626	5.68107	-1.12174
chr11	59918514	60036083	Rai1	29.5882	12.3306	-1.26278	chr11	59918514	60036083	Rai1	79.2938	31.4565	-1.33385
chr10	57909599	57956902	Ranbp2	15.2226	11.9188	-0.352984	chr10	57909599	57956902	Ranbp2	33.1973	13.595	-1.28799
chr17	56812647	56851192	Ranbp3	78.043	62.5829	-0.318502	chr17	56812647	56851192	Ranbp3	109.785	47.4054	-1.21156
chr8	13567217	13677587	Rasa3	37.8552	30.8827	-0.293696	chr8	13567217	13677587	Rasa3	51.4635	24.3789	-1.07792
chr11	4954133	4965330	Rasl10a	0.768095	2.4273	1.66	chr11	4954133	4965330	Rasl10a	1.55191	0.23575	-2.71872
chr2	152142069	152158375	Rbck1	44.5226	27.1625	-0.71292	chr2	152142069	152158375	Rbck1	105.8	38.8142	-1.44668
chr3	107129027	107136207	Rbm15	7.80159	3.68067	-1.0838	chr3	107129027	107136207	Rbm15	10.6821	4.3479	-1.29681
chr2	172847402	172860232	Rbm38	13.8877	17.6895	0.349094	chr2	172847402	172860232	Rbm38	13.5774	5.88052	-1.20719
chrX	7716100	7725089	Rbm3os	1.19731	1.33491	0.156947	chrX	7716100	7725089	Rbm3os	1.4738	0.676697	-1.12296
chr9	107675890	107775150	Rbm6	24.0694	18.8564	-0.352149	chr9	107675890	107775150	Rbm6	42.1039	19.528	-1.10841
chr8	34893115	35040335	Rbpms	0.338508	2.65283	2.97027	chr8	34893115	35040335	Rbpms	1.88518	0.558409	-1.75531
chr14	73542316	73583861	Rcbtb2	9.22629	16.2855	0.819764	chr14	73542316	73583861	Rcbtb2	6.66566	3.12356	-1.09355
chr5	134623927	134652637	Rcc1l	22.9037	19.8318	-0.207768	chr5	134623927	134652637	Rcc1l	32.3223	15.4408	-1.06579
chr19	7341883	7349715	Rcor2	15.7395	10.0817	-0.642646	chr19	7341883	7349715	Rcor2	16.607	2.91412	-2.51066
chr11	115753908	115794806	Recql5	9.01082	4.38475	-1.03916	chr11	115753908	115794806	Recql5	16.641	7.69093	-1.11352
chr18	35000242	35007117	Reep2	8.74822	8.57343	-0.0291175	chr18	35000242	35007117	Reep2	22.3447	10.2452	-1.12499
chr7	20191570	20214787	Relb	12.3928	11.6012	-0.0952315	chr7	20191570	20214787	Relb	38.4813	13.1175	-1.55266
chr1	107560437	107651708	Relch	7.20638	3.13028	-1.20299	chr1	107560437	107651708	Relch	11.2708	4.76093	-1.24327
chr14	55094936	55099271	Rem2	1.74459	1.17332	-0.572292	chr14	55094936	55099271	Rem2	1.6182	0.246353	-2.71559
chr6	146981058	146982040	Rep15	18.1447	1.97586	-3.199	chr6	146981058	146982040	Rep15	17.5428	1.09447	-4.00258
chr6	149257935	149284185	Resf1	20.2259	11.16	-0.857862	chr6	149257935	149284185	Resf1	97.321	46.5438	-1.06416
chr10	39451965	39595011	Rev3l	4.5423	2.85595	-0.669453	chr10	39451965	39595011	Rev3l	22.2115	10.1243	-1.13348
chr14	31467560	31504499	Rft1	9.23889	6.87729	-0.42588	chr14	31467560	31504499	Rft1	11.58	5.68243	-1.02705
chr17	50132631	50329822	Rftn1	3.14419	3.96998	0.336442	chr17	50132631	50329822	Rftn1	13.6865	4.32172	-1.66308
chr17	56915319	56970431	Rfx2	3.72893	2.36617	-0.656208	chr17	56915319	56970431	Rfx2	3.0984	1.0808	-1.51942
chr14	79688556	79701442	Rgcc	4.31096	3.27446	-0.396755	chr14	79688556	79701442	Rgcc	2.58429	0.605831	-2.09278
chr9	21775970	21793897	Rgl3	12.6872	4.95092	-1.35761	chr9	21775970	21793897	Rgl3	26.0265	8.08406	-1.68683
chr1	155587482	155592598	Rgs16	33.2337	23.4778	-0.501347	chr1	155587482	155592598	Rgs16	145.061	72.3521	-1.00355
chr17	34157736	34161625	Ring1	19.3881	13.4559	-0.526931	chr17	34157736	34161625	Ring1	26.6614	12.1162	-1.13781
chr14	56403831	56407694	Ripk3	6.43163	6.32684	-0.0236972	chr14	56403831	56407694	Ripk3	10.7134	3.79131	-1.49865
chr5	121059068	121062598	Rita1	5.07397	6.87345	0.437918	chr5	121059068	121062598	Rita1	10.1691	3.07311	-1.72643
chr18	12327238	12394895	Rmc1	10.4792	6.87157	-0.608822	chr18	12327238	12394895	Rmc1	17.0023	7.33648	-1.21257
chr17	80014239	80084316	Rmdn2	1.91621	2.26353	0.240313	chr17	80014239	80084316	Rmdn2	2.43341	0.897242	-1.43941
chr4	43505656	43505931	Rmrp	1174.17	346.827	-1.75935	chr4	43505656	43505931	Rmrp	53739.9	2892.55	-4.21558
chr18	38456288	38477503	Rnf14	24.1986	17.6474	-0.455467	chr18	38456288	38477503	Rnf14	31.9091	13.841	-1.20502
chr17	24852784	24855002	Rnf151	1.08203	0.161464	-2.74445	chr17	24852784	24855002	Rnf151	1.84977	0.216635	-3.094
chr8	27229839	27254347	Rnf170	4.71561	3.24465	-0.539381	chr8	27229839	27254347	Rnf170	3.58121	1.75688	-1.02743
chr2	25098448	25099781	Rnf208	1.62964	0.913051	-0.835791	chr2	25098448	25099781	Rnf208	7.45354	2.05414	-1.85939
chr4	155504623	155507526	Rnf223	3.04139	0.646553	-2.23389	chr4	155504623	155507526	Rnf223	9.22917	1.26003	-2.87275
chr2	131087743	131178628	Rnf24	1.91894	1.57101	-0.28862	chr2	131087743	131178628	Rnf24	1.82985	0.54595	-1.74489
chr14	56210578	56222511	Rnf31	10.646	5.73	-0.893705	chr14	56210578	56222511	Rnf31	21.0009	5.47194	-1.94032
chr7	134732211	134747119	Rnf40	43.4375	21.4013	-1.02124	chr7	134732211	134747119	Rnf40	53.8446	25.3381	-1.08749
chr17	29751733	29853962	Rnf8	18.1285	14.0518	-0.367505	chr17	29751733	29853962	Rnf8	17.6122	8.66694	-1.02298
chr3	113307984	113333067	Rnpc3	10.2731	7.91117	-0.376916	chr3	113307984	113333067	Rnpc3	6.31971	2.23832	-1.49744
chr1	94807401	94817162	Rnpepl1	16.4141	12.3933	-0.405374	chr1	94807401	94817162	Rnpepl1	24.5994	7.92615	-1.63393
chr10	39978273	39978485	Rnu3a	2858.28	123.348	-4.53433	chr10	39978273	39978485	Rnu3a	29469.2	1218	-4.59662
chr16	5008821	5013646	Rogdi	10.9499	9.24229	-0.244594	chr16	5008821	5013646	Rogdi	17.3265	4.44641	-1.96227
chr2	119589694	119613273	Rpap1	12.0576	8.12352	-0.56976	chr2	119589694	119613273	Rpap1	15.2933	5.48179	-1.48018
chr4	133403205	133443712	Rps6ka1	2.87024	5.01471	0.804995	chr4	133403205	133443712	Rps6ka1	2.41288	1.04635	-1.20539
chr1	192596757	192735649	Rps6kc1	8.55807	8.29109	-0.0457232	chr1	192596757	192735649	Rps6kc1	13.4569	5.32062	-1.33868
chr19	41937340	41970643	Rrp12	15.9493	15.3098	-0.0590336	chr19	41937340	41970643	Rrp12	19.0629	8.83074	-1.11016
chr4	141239477	141279334	Rsc1a1	29.2559	18.7334	-0.643116	chr4	141239477	141279334	Rsc1a1	23.3825	11.4969	-1.02419
chr17	7109064	7152705	Rsph3b	0.420458	3.80528	3.17797	chr17	7109064	7152705	Rsph3b	1.6306	0.595506	-1.45321
chr10	43621612	43667669	Rtn4ip1	11.2699	6.921	-0.703428	chr10	43621612	43667669	Rtn4ip1	10.7076	4.80331	-1.15653
chr16	92601710	92826319	Runx1	39.4346	45.7651	0.214784	chr16	92601710	92826319	Runx1	245.881	121.233	-1.02018
chr4	43394853	43442006	Rusc2	15.225	7.19296	-1.08179	chr4	43394853	43442006	Rusc2	48.4913	19.1907	-1.33732
chr3	115413350	115417973	S1pr1	0.587183	1.19252	1.02213	chr3	115413350	115417973	S1pr1	1.43197	0.662873	-1.11119
chr14	61757293	61877327	Sacs	11.3823	5.09413	-1.15989	chr14	61757293	61877327	Sacs	21.7695	8.79185	-1.30807
chr17	56724404	56745717	Safb	105.116	68.5711	-0.616305	chr17	56724404	56745717	Safb	152.539	60.7656	-1.32785
chr17	35153523	35164961	Sapcd1	2.0165	1.78665	-0.174601	chr17	35153523	35164961	Sapcd1	4.54682	1.67083	-1.44429
chr2	25227554	25233733	Sapcd2	15.2952	5.46117	-1.4858	chr2	25227554	25233733	Sapcd2	4.33022	1.27436	-1.76466
chr7	29526986	29538898	Sars2	24.1417	16.867	-0.517322	chr7	29526986	29538898	Sars2	47.6425	20.2626	-1.23343
chr7	52258319	52271619	Scaf1	76.1282	51.0714	-0.575914	chr7	52258319	52271619	Scaf1	144.802	71.2624	-1.02287
chr9	110235791	110287453	Scap	28.1014	25.9303	-0.116006	chr9	110235791	110287453	Scap	39.4675	17.8355	-1.14591
chr16	17797374	17808386	Scarf2	51.7405	21.6918	-1.25415	chr16	17797374	17808386	Scarf2	96.5772	34.463	-1.48664
chr12	106268826	106270489	Scarna13	9.22389	8.36378	-0.141221	chr12	106268826	106270489	Scarna13	462.769	40.2852	-3.52197
chr4	120077885	120202804	Scmh1	10.6734	8.23411	-0.374335	chr4	120077885	120202804	Scmh1	14.357	4.97018	-1.53039
chr9	40076800	40099203	Scn3b	2.08158	1.34483	-0.630261	chr9	40076800	40099203	Scn3b	1.27767	0.253949	-2.33091
chr9	119392525	119488134	Scn5a	51.9857	26.6308	-0.965016	chr9	119392525	119488134	Scn5a	68.1558	29.5606	-1.20516
chr11	96891265	96895274	Scrn2	3.16618	10.2838	1.69955	chr11	96891265	96895274	Scrn2	8.65949	3.20502	-1.43395
chr2	151398358	151415741	Sdcbp2	1.9985	0.496442	-2.00922	chr2	151398358	151415741	Sdcbp2	2.18242	0.177817	-3.61746
chr1	178744790	179178898	Sdccag8	1.89431	4.70576	1.31275	chr1	178744790	179178898	Sdccag8	6.33498	1.46559	-2.11185
chr5	120908210	120922772	Sdsl	2.16264	1.60318	-0.431858	chr5	120908210	120922772	Sdsl	4.57271	1.69034	-1.43573
chr7	52933056	52949926	Sec1	5.03559	2.60228	-0.952385	chr7	52933056	52949926	Sec1	5.75838	0.615811	-3.2251
chr11	3997042	4018732	Sec14l2	4.68387	7.12384	0.604954	chr11	3997042	4018732	Sec14l2	4.39124	2.06392	-1.08924
chr2	26264950	26300736	Sec16a	10.0146	8.0049	-0.323146	chr2	26264950	26300736	Sec16a	19.6226	8.41826	-1.22092
chr16	35311216	35364004	Sec22a	3.22068	4.29	0.413611	chr16	35311216	35364004	Sec22a	2.1694	0.767377	-1.49929
chr9	107500004	107511572	Sema3b	4.08506	2.14781	-0.92749	chr9	107500004	107511572	Sema3b	4.63558	1.67476	-1.4688
chr9	107583832	107612806	Sema3f	1.45909	0.976885	-0.578807	chr9	107583832	107612806	Sema3f	2.10104	0.66328	-1.66341
chr3	88239883	88265104	Sema4a	2.11359	0.924405	-1.1931	chr3	88239883	88265104	Sema4a	1.77626	0.770267	-1.20541
chr1	36605483	36615226	Sema4c	34.0474	11.5834	-1.55549	chr1	36605483	36615226	Sema4c	20.8446	5.65205	-1.88283
chr2	84605516	84615586	Serping1	4.59993	7.48651	0.702681	chr2	84605516	84615586	Serping1	3.6682	0.779746	-2.234
chr4	132048721	132066371	Sesn2	22.9882	7.25865	-1.66312	chr4	132048721	132066371	Sesn2	21.5309	5.28606	-2.02614
chr7	134920902	134943633	Setd1a	36.8003	14.8074	-1.3134	chr7	134920902	134943633	Setd1a	42.3933	16.9929	-1.3189
chr9	110435100	110521137	Setd2	8.53266	8.93234	0.0660425	chr9	110435100	110521137	Setd2	53.6744	16.0447	-1.74214
chr3	95119111	95161124	Setdb1	35.766	13.9732	-1.35593	chr3	95119111	95161124	Setdb1	77.065	29.7859	-1.37144
chr6	108015038	108027121	Setmar	1.29087	2.33376	0.854306	chr6	108015038	108027121	Setmar	2.13933	0.746551	-1.51885
chr2	28980511	29037991	Setx	7.34671	5.70111	-0.365856	chr2	28980511	29037991	Setx	26.5109	12.1561	-1.12491
chr5	130007105	130077259	Sfswap	49.6316	17.4053	-1.51174	chr5	130007105	130077259	Sfswap	176.102	61.1769	-1.52535
chr15	80808194	81021166	Sgsm3	9.23115	7.1943	-0.359655	chr15	80808194	81021166	Sgsm3	9.97444	4.30436	-1.21244
chr2	32576574	32610527	Sh2d3c	0.733001	1.11632	0.606865	chr2	32576574	32610527	Sh2d3c	1.13487	0.257709	-2.13872
chr5	34868432	34906288	Sh3bp2	11.2749	4.97795	-1.17949	chr5	34868432	34906288	Sh3bp2	16.0238	4.86356	-1.72014
chr17	56148623	56176082	Sh3gl1	49.2986	35.9165	-0.456899	chr17	56148623	56176082	Sh3gl1	68.4314	30.0733	-1.18617
chr2	30200296	30214836	Sh3glb2	20.5787	15.3513	-0.42279	chr2	30200296	30214836	Sh3glb2	44.8136	16.2498	-1.46351
chr10	58276106	58601664	Sh3rf3	0.876971	1.2072	0.461063	chr10	58276106	58601664	Sh3rf3	3.23552	0.705002	-2.1983
chr14	35050220	35123703	Shld2	0.858999	2.35946	1.45773	chr14	35050220	35123703	Shld2	4.46991	2.18565	-1.03218
chr9	45745939	45764081	Sidt2	36.6338	24.1277	-0.602486	chr9	45745939	45764081	Sidt2	82.2	35.4363	-1.21391
chr7	148277073	148286445	Sigirr	2.47077	1.63725	-0.593683	chr7	148277073	148286445	Sigirr	1.31016	0.501604	-1.38512
chr9	50665028	50817178	Sik2	4.25682	0.985066	-2.11148	chr9	50665028	50817178	Sik2	4.25628	0.537189	-2.98609
chr9	45820902	46032277	Sik3	10.3603	6.89795	-0.586829	chr9	45820902	46032277	Sik3	30.6944	11.0963	-1.4679
chr13	54605165	54666743	Simc1	10.3058	5.8052	-0.828036	chr13	54605165	54666743	Simc1	11.9741	5.19803	-1.20389
chr19	5651184	5663707	Sipa1	22.5613	13.7142	-0.718182	chr19	5651184	5663707	Sipa1	39.5766	17.2381	-1.19905
chr7	29551770	29573684	Sirt2	35.9688	40.6296	0.175786	chr7	29551770	29573684	Sirt2	56.0127	20.2841	-1.4654
chr10	81084530	81090353	Sirt6	30.6464	13.2484	-1.2099	chr10	81084530	81090353	Sirt6	30.9937	12.7495	-1.28154
chr17	34976170	34987149	Skiv2l	27.9699	18.263	-0.614955	chr17	34976170	34987149	Skiv2l	56.4296	23.9452	-1.23671
chr8	108467489	108490015	Slc12a4	57.8069	30.6046	-0.91749	chr8	108467489	108490015	Slc12a4	151.687	63.2097	-1.26288
chr10	76495483	76513177	Slc19a1	16.313	19.2162	0.236296	chr10	76495483	76513177	Slc19a1	33.9583	9.50665	-1.83675
chr16	17925303	17928312	Slc25a1	14.6309	23.116	0.659875	chr16	17925303	17928312	Slc25a1	21.87	10.5194	-1.0559
chr17	57183133	57199286	Slc25a23	1.10535	1.06079	-0.0593724	chr17	57183133	57199286	Slc25a23	2.3151	0.655968	-1.81938
chr19	5877821	5885768	Slc25a45	3.2304	2.31779	-0.478964	chr19	5877821	5885768	Slc25a45	5.32436	2.62825	-1.01851
chr3	90189154	90193860	Slc27a3	9.71428	18.7202	0.946421	chr3	90189154	90193860	Slc27a3	20.2498	9.26095	-1.12868
chr19	5024005	5031972	Slc29a2	19.835	10.141	-0.967856	chr19	5024005	5031972	Slc29a2	14.2523	6.24161	-1.1912
chr5	143178054	143198443	Slc29a4	0.781667	1.90816	1.28756	chr5	143178054	143198443	Slc29a4	1.68875	0.803018	-1.07245
chr6	122677826	122692763	Slc2a3	2.23639	2.66654	0.253802	chr6	122677826	122692763	Slc2a3	2.1176	0.828764	-1.3534
chr13	64197617	64230638	Slc35d2	2.48184	1.24026	-1.00076	chr13	64197617	64230638	Slc35d2	4.35329	2.01129	-1.11398
chr9	107553485	107571299	Slc38a3	2.45473	1.30015	-0.91688	chr9	107553485	107571299	Slc38a3	8.39033	3.2782	-1.35582
chr2	90901937	90910472	Slc39a13	88.0833	37.9592	-1.21442	chr2	90901937	90910472	Slc39a13	294.864	114.873	-1.36001
chr5	23931049	23946765	Slc4a2	41.9983	20.3922	-1.04231	chr5	23931049	23946765	Slc4a2	45.1924	20.4345	-1.14507
chr5	31338408	31357006	Slc5a6	4.32374	4.29342	-0.0101519	chr5	31338408	31357006	Slc5a6	6.47286	2.46116	-1.39506
chr8	108692753	108722614	Slc7a6	19.502	15.4426	-0.33671	chr8	108692753	108722614	Slc7a6	30.3115	10.2735	-1.56094
chr14	54980524	55036539	Slc7a7	3.29165	4.71664	0.518945	chr14	54980524	55036539	Slc7a7	6.62163	2.06914	-1.67815
chr4	132925649	132979617	Slc9a1	19.1336	11.2022	-0.772329	chr4	132925649	132979617	Slc9a1	28.3027	11.1682	-1.34154
chr9	94570310	95130871	Slc9a9	27.0148	16.0152	-0.754311	chr9	94570310	95130871	Slc9a9	35.8698	17.0988	-1.06887
chr11	82793804	82805332	Slfn9	3.84214	1.8786	-1.03225	chr11	82793804	82805332	Slfn9	2.65965	1.01824	-1.38517
chr2	136699515	136897686	Slx4ip	3.43762	1.66529	-1.04563	chr2	136699515	136897686	Slx4ip	1.75097	0.707686	-1.30698
chr1	72629824	72683364	Smarcal1	5.54604	2.94882	-0.911322	chr1	72629824	72683364	Smarcal1	5.81699	2.73492	-1.08877
chr11	74711581	74977951	Smg6	9.14111	6.47743	-0.496947	chr11	74711581	74977951	Smg6	21.2261	6.56818	-1.69227
chr7	25184646	25207796	Smg9	21.5979	19.6206	-0.138522	chr7	25184646	25207796	Smg9	39.2849	18.742	-1.0677
chr1	95132473	95193025	Sned1	1.65083	0.333912	-2.30565	chr1	95132473	95193025	Sned1	2.77485	0.391362	-2.82584
chr7	117161828	117200121	Snora23	13.457	11.3047	-0.251439	chr7	117161828	117200121	Snora23	4316.67	247.571	-4.124
chr11	32105414	32108995	Snrnp25	13.7517	45.809	1.73603	chr11	32105414	32108995	Snrnp25	6.71717	2.05925	-1.70574
chr9	56798714	56831006	Snupn	7.14929	9.69621	0.439621	chr9	56798714	56831006	Snupn	11.2891	4.23272	-1.41527
chr16	91648068	91679437	Son	91.537	46.9679	-0.96268	chr16	91648068	91679437	Son	566.948	219.035	-1.37205
chr14	70580274	70607478	Sorbs3	31.1737	19.6241	-0.667702	chr14	70580274	70607478	Sorbs3	62.8737	29.6822	-1.08286
chr3	37318871	37478018	Spata5	5.86232	12.853	1.13256	chr3	37318871	37478018	Spata5	11.1374	3.22378	-1.78859
chr2	122456360	122458440	Spata5l1	8.12609	3.3883	-1.262	chr2	122456360	122458440	Spata5l1	10.4583	3.41462	-1.61485
chr15	98957275	99042897	Spats2	18.1125	10.3701	-0.804555	chr15	98957275	99042897	Spats2	12.272	5.18545	-1.24283
chr2	130995996	131000546	Spef1	19.5482	6.51598	-1.58498	chr2	130995996	131000546	Spef1	135.607	43.3182	-1.64639
chr11	116392413	116397989	Sphk1	10.9702	5.51449	-0.992293	chr11	116392413	116397989	Sphk1	34.4268	11.9805	-1.52284
chr2	30027043	30033979	Spout1	28.9487	23.5486	-0.297856	chr2	30027043	30033979	Spout1	33.0208	15.2961	-1.11021
chr11	19824444	19922600	Spred2	11.4192	8.455	-0.433589	chr11	19824444	19922600	Spred2	6.10034	1.56372	-1.96391
chr15	101946958	101966646	Spryd3	14.3067	9.94522	-0.524614	chr15	101946958	101966646	Spryd3	20.3189	6.17758	-1.71771
chr16	4480211	4523066	Srl	5.44321	5.18023	-0.071441	chr16	4480211	4523066	Srl	2.4473	1.18593	-1.04518
chr17	28726532	28759466	Srpk1	41.6387	22.4102	-0.893768	chr17	28726532	28759466	Srpk1	41.2566	20.3054	-1.02276
chr7	4877422	4896430	Ssc5d	41.9064	17.3403	-1.27304	chr7	4877422	4896430	Ssc5d	32.6879	10.808	-1.59667
chr19	4261668	4269233	Ssh3	6.40922	3.1948	-1.00442	chr19	4261668	4269233	Ssh3	14.1353	3.52217	-2.00477
chr4	117604757	117807551	St3gal3	7.15293	9.05461	0.340118	chr4	117604757	117807551	St3gal3	8.44056	3.18096	-1.40788
chr11	116538018	116555974	St6galnac2	5.04164	2.28123	-1.14408	chr11	116538018	116555974	St6galnac2	6.25586	2.28706	-1.45171
chr10	126938741	126945874	Stac3	22.8631	29.0097	0.343518	chr10	126938741	126945874	Stac3	34.3995	11.9519	-1.52515
chr11	98219681	98242426	Stard3	13.313	11.2277	-0.245776	chr11	98219681	98242426	Stard3	21.1689	10.3495	-1.03239
chr10	127080041	127103759	Stat6	12.4358	11.4613	-0.117727	chr10	127080041	127103759	Stat6	23.1047	11.1333	-1.05331
chr10	79578539	79602112	Stk11	97.8786	61.2485	-0.67632	chr10	79578539	79602112	Stk11	624.848	202.548	-1.62524
chr11	106024287	106054917	Strada	25.7518	14.8268	-0.796469	chr11	106024287	106054917	Strada	34.6805	14.2396	-1.28422
chr1	59030365	59051965	Stradb	4.36334	6.77418	0.634615	chr1	59030365	59051965	Stradb	6.93659	2.62073	-1.40426
chr8	3631108	3643998	Stxbp2	5.09111	7.06234	0.472167	chr8	3631108	3643998	Stxbp2	11.0243	4.36326	-1.33721
chr14	45970860	46008471	Styx	2.45388	2.12918	-0.204768	chr14	45970860	46008471	Styx	2.87922	1.30298	-1.14387
chr5	114476921	114541389	Svop	1.41227	0.721262	-0.969424	chr5	114476921	114541389	Svop	6.68686	2.30388	-1.53726
chr4	128964864	129012614	Sync	18.5157	13.0975	-0.499465	chr4	128964864	129012614	Sync	13.538	5.00172	-1.43652
chr12	106168142	106248019	Syne3	6.54024	5.16762	-0.339843	chr12	106168142	106248019	Syne3	3.06897	1.48376	-1.04849
chr3	122779436	122939067	Synpo2	1.63266	1.20527	-0.437863	chr3	122779436	122939067	Synpo2	2.635	1.01986	-1.36943
chrX	7215705	7230382	Syp	2.07307	1.05024	-0.981046	chrX	7215705	7230382	Syp	1.17488	0.546837	-1.10333
chr4	132809004	132819002	Sytl1	6.84065	3.30423	-1.04982	chr4	132809004	132819002	Sytl1	28.4582	13.4866	-1.07732
chr15	79963575	79992136	Tab1	29.8418	9.53949	-1.64535	chr15	79963575	79992136	Tab1	44.665	11.3249	-1.97965
chr7	137720951	137908399	Tacc2	9.12248	14.5685	0.675349	chr7	137720951	137908399	Tacc2	28.242	13.9269	-1.01997
chr2	59450098	59684270	Tanc1	7.24527	5.40924	-0.421613	chr2	59450098	59684270	Tanc1	5.91289	2.51701	-1.23215
chr8	109206967	109375339	Tango6	6.38561	4.48242	-0.510547	chr8	109206967	109375339	Tango6	2.99698	0.492623	-2.60495
chr6	125174229	125189952	Tapbpl	3.69261	3.00687	-0.296379	chr6	125174229	125189952	Tapbpl	2.05152	1.00907	-1.02367
chr8	128950551	128998965	Tarbp1	1.28348	0.758297	-0.759224	chr8	128950551	128998965	Tarbp1	1.20334	0.0862215	-3.80285
chr1	192869708	192886811	Tatdn3	11.7765	6.64466	-0.825646	chr1	192869708	192886811	Tatdn3	11.176	5.03901	-1.14919
chr11	4086835	4115508	Tbc1d10a	13.5742	13.675	0.010677	chr11	4086835	4115508	Tbc1d10a	25.4922	10.0413	-1.34412
chr7	52067625	52104449	Tbc1d17	16.4988	12.5347	-0.39643	chr7	52067625	52104449	Tbc1d17	25.938	11.5491	-1.16729
chr4	46617261	46663071	Tbc1d2	1.94791	0.905359	-1.10536	chr4	46617261	46663071	Tbc1d2	7.52309	3.08458	-1.28625
chr17	29686746	29743753	Tbc1d22b	9.4348	6.11625	-0.625346	chr17	29686746	29743753	Tbc1d22b	8.31317	4.10601	-1.01766
chr14	101841576	102008408	Tbc1d4	2.22311	1.51757	-0.550817	chr14	101841576	102008408	Tbc1d4	3.87981	1.12563	-1.78525
chr11	49944861	49986287	Tbc1d9b	9.42268	9.18646	-0.0366294	chr11	49944861	49986287	Tbc1d9b	14.8707	7.12805	-1.06089
chr17	24837597	24844598	Tbl3	29.4537	35.3652	0.263879	chr17	24837597	24844598	Tbl3	32.7652	14.1527	-1.21109
chr11	6515600	6526070	Tbrg4	76.6279	43.3327	-0.822415	chr11	6515600	6526070	Tbrg4	82.3256	39.7037	-1.05207
chrX	133242520	133244412	Tceal1	4.20236	12.2236	1.5404	chrX	133242520	133244412	Tceal1	1.24305	0.42508	-1.54808
chr15	82639054	82742564	Tcf20	8.40572	4.93087	-0.769529	chr15	82639054	82742564	Tcf20	22.7167	8.54315	-1.41091
chr10	82092582	82153395	Tdg-ps2	9.65272	12.4012	0.361467	chr10	82092582	82153395	Tdg-ps2	12.1303	1.13531	-3.41746
chr17	28468617	28487750	Tead3	34.3463	16.6275	-1.04659	chr17	28468617	28487750	Tead3	46.969	19.3371	-1.28034
chr5	73146956	73259687	Tec	3.0598	1.59036	-0.94408	chr5	73146956	73259687	Tec	5.29861	1.41767	-1.90209
chr17	25236513	25252912	Telo2	17.4377	8.00393	-1.12343	chr17	25236513	25252912	Telo2	35.6263	13.3414	-1.41703
chr14	51443735	51490229	Tep1	6.86465	3.47582	-0.981831	chr14	51443735	51490229	Tep1	7.06921	2.93216	-1.26959
chr4	48292631	48486335	Tex10	17.3964	23.5653	0.437876	chr4	48292631	48486335	Tex10	78.6947	29.5977	-1.41078
chr17	84589395	84865548	Thada	3.30255	3.48955	0.0794619	chr17	84589395	84865548	Thada	5.27983	2.31483	-1.18959
chr18	9958177	10030147	Thoc1	30.4129	19.1404	-0.668065	chr18	9958177	10030147	Thoc1	40.2263	18.0453	-1.15652
chr4	125841325	125879954	Thrap3	82.9098	50.1294	-0.725886	chr4	125841325	125879954	Thrap3	138.037	56.6462	-1.285
chr17	81425666	81464425	Thumpd2	5.83565	5.37494	-0.118642	chr17	81425666	81464425	Thumpd2	8.16885	3.41727	-1.25729
chr7	86805081	86859072	Ticrr	6.15217	3.60192	-0.772327	chr7	86805081	86859072	Ticrr	2.55094	1.27022	-1.00595
chr17	46394799	46419975	Tjap1	101.782	62.5027	-0.703486	chr17	46394799	46419975	Tjap1	237.273	104.416	-1.1842
chr10	81053648	81063645	Tle6	3.42193	1.5796	-1.11525	chr10	81053648	81063645	Tle6	4.7676	0.926756	-2.363
chr3	83640193	83645530	Tlr2	1.28629	0.779641	-0.722331	chr3	83640193	83645530	Tlr2	1.0226	0.313781	-1.70441
chr8	72596822	72603965	Tm6sf2	1.14356	0.725492	-0.656506	chr8	72596822	72603965	Tm6sf2	5.91008	1.53363	-1.94622
chr19	6062820	6077187	Tm7sf2	1.22053	1.53679	0.332413	chr19	6062820	6077187	Tm7sf2	5.86981	1.16425	-2.33391
chr7	3596870	3629155	Tmc4	2.691	0.789136	-1.76979	chr7	3596870	3629155	Tmc4	4.09092	1.07743	-1.92482
chr4	138528197	138615086	Tmco4	0.69641	2.10327	1.59463	chr4	138528197	138615086	Tmco4	2.12254	0.684047	-1.63363
chr18	36894723	36904241	Tmco6	7.53794	4.05452	-0.894638	chr18	36894723	36904241	Tmco6	8.86548	3.90867	-1.18152
chr11	101443555	101453100	Tmem106a	1.93526	2.93965	0.603119	chr11	101443555	101453100	Tmem106a	3.52572	1.49298	-1.23972
chr5	136211359	136220042	Tmem120a	15.9458	36.8786	1.2096	chr5	136211359	136220042	Tmem120a	30.0117	14.9541	-1.00498
chr5	123526283	123567454	Tmem120b	9.41044	8.15582	-0.206432	chr5	123526283	123567454	Tmem120b	11.1546	4.17643	-1.4173
chr12	114424113	114427733	Tmem121	2.51625	12.1507	2.2717	chr12	114424113	114427733	Tmem121	1.44802	0.601599	-1.2672
chr1	36849033	36996372	Tmem131	10.5967	17.2234	0.700751	chr1	36849033	36996372	Tmem131	17.0873	6.88389	-1.31162
chr3	83702208	83844083	Tmem131l	7.66053	4.52636	-0.759093	chr3	83702208	83844083	Tmem131l	7.8899	3.91414	-1.01131
chr3	79617074	79646584	Tmem144	2.56751	1.82764	-0.490391	chr3	79617074	79646584	Tmem144	1.59956	0.700164	-1.19191
chr1	121804475	121809760	Tmem177	1.9769	3.7705	0.931521	chr1	121804475	121809760	Tmem177	2.17019	0.40439	-2.424
chr17	6256859	6317474	Tmem181a	11.563	7.1311	-0.69732	chr17	6256859	6317474	Tmem181a	11.4699	4.77315	-1.26484
chr4	131477685	131479055	Tmem200b	1.69395	2.50822	0.56627	chr4	131477685	131479055	Tmem200b	3.01947	0.546508	-2.46598
chr5	31171951	31179842	Tmem214	36.2564	25.5148	-0.506905	chr5	31171951	31179842	Tmem214	45.6694	21.1393	-1.1113
chr4	56888884	56960301	Tmem245	2.43439	2.08283	-0.225015	chr4	56888884	56960301	Tmem245	1.89792	0.84958	-1.15959
chrX	130829763	130840508	Tmem35a	2.24136	3.84788	0.779689	chrX	130829763	130840508	Tmem35a	1.14265	0.36724	-1.63759
chr1	121963953	121970357	Tmem37	10.1355	9.5401	-0.0873371	chr1	121963953	121970357	Tmem37	2.54432	0.787615	-1.69172
chr8	75095721	75111183	Tmem38a	7.58493	7.79377	0.0391857	chr8	75095721	75111183	Tmem38a	5.49297	1.97007	-1.47934
chr4	116924555	116941193	Tmem53	6.02757	6.4264	0.0924354	chr4	116924555	116941193	Tmem53	6.26104	2.84034	-1.14034
chr17	45797125	45823167	Tmem63b	37.8207	21.9954	-0.781978	chr17	45797125	45823167	Tmem63b	106.122	43.3553	-1.29144
chr7	4579641	4582084	Tmem86b	7.67219	3.12118	-1.29755	chr7	4579641	4582084	Tmem86b	19.3059	2.28738	-3.07727
chr5	23951280	23953664	Tmub1	7.53919	5.92421	-0.347787	chr5	23951280	23953664	Tmub1	7.76204	1.32509	-2.55035
chr10	18720716	18735216	Tnfaip3	5.79278	2.1534	-1.42764	chr10	18720716	18735216	Tnfaip3	14.8856	3.47393	-2.09928
chr17	56301913	56313378	Tnfaip8l1	0.646475	3.60273	2.47843	chr17	56301913	56313378	Tnfaip8l1	1.28084	0.487141	-1.39467
chr16	32644728	32683579	Tnk2	37.7863	29.8902	-0.338193	chr16	32644728	32683579	Tnk2	78.6035	38.6687	-1.02343
chr1	137695997	137707566	Tnni1	8.80224	9.8788	0.166465	chr1	137695997	137707566	Tnni1	1.41267	0.253799	-2.47667
chr11	117515602	117624753	Tnrc6c	15.1153	6.49281	-1.21909	chr11	117515602	117624753	Tnrc6c	77.464	29.3798	-1.3987
chr8	77557584	77594020	Tom1	3.59322	1.80926	-0.989873	chr8	77557584	77594020	Tom1	5.5973	1.698	-1.72089
chr15	76456666	76470359	Tonsl	15.8697	6.71162	-1.24154	chr15	76456666	76470359	Tonsl	12.3999	3.41885	-1.85874
chr11	60551710	60590867	Top3a	7.50539	3.7251	-1.01065	chr11	60551710	60590867	Top3a	7.66207	3.08665	-1.31169
chr16	16870828	16893079	Top3b	22.8557	14.4725	-0.659245	chr16	16870828	16893079	Top3b	43.5114	14.3625	-1.59908
chr2	34797269	34817292	Traf1	1.87078	0.619143	-1.59529	chr2	34797269	34817292	Traf1	12.3509	3.91069	-1.65912
chr9	107853293	107874599	Traip	13.8188	9.913	-0.47924	chr9	107853293	107874599	Traip	8.89617	3.7485	-1.24687
chr9	121206619	121384036	Trak1	33.2855	14.0325	-1.24612	chr9	121206619	121384036	Trak1	21.0656	8.47393	-1.31379
chr7	109706433	109713996	Trim21	3.26656	1.86634	-0.807563	chr7	109706433	109713996	Trim21	5.82588	0.911883	-2.67556
chr11	48619905	48630893	Trim41	23.212	9.68352	-1.26127	chr11	48619905	48630893	Trim41	59.2148	22.5401	-1.39347
chr11	115967063	115971549	Trim47	41.7532	51.6984	0.308232	chr11	115967063	115971549	Trim47	52.178	21.7378	-1.26324
chr15	78778153	78841471	Triobp	15.8814	13.9534	-0.186722	chr15	78778153	78841471	Triobp	24.3398	12.1574	-1.00149
chr4	46389846	46402309	Trmo	9.24635	4.66643	-0.986564	chr4	46389846	46402309	Trmo	10.4617	3.99826	-1.38768
chr8	87194377	87223707	Trmt1	94.3736	55.5129	-0.765559	chr8	87194377	87223707	Trmt1	153.904	76.4946	-1.0086
chr15	58704203	58708336	Trmt12	2.68385	3.56566	0.409869	chr15	58704203	58708336	Trmt12	2.35737	0.739648	-1.67227
chr16	18248975	18289261	Trmt2a	30.7705	18.5053	-0.733614	chr16	18248975	18289261	Trmt2a	33.9783	13.4905	-1.33266
chr5	35898857	35917719	Trmt44	6.09358	3.34294	-0.866171	chr5	35898857	35917719	Trmt44	5.68324	2.20518	-1.36581
chr15	85709756	85727823	Trmu	6.89775	7.05113	0.0317295	chr15	85709756	85727823	Trmu	17.5984	6.70384	-1.39239
chr2	120996903	121097143	Trp53bp1	12.3114	5.35203	-1.20184	chr2	120996903	121097143	Trp53bp1	15.6115	5.94009	-1.39405
chr7	52558524	52589150	Trpm4	3.64518	1.58163	-1.20457	chr7	52558524	52589150	Trpm4	4.48479	0.720166	-2.63864
chr19	7070620	7093959	Trpt1	7.36038	4.02281	-0.871579	chr19	7070620	7093959	Trpt1	7.20537	3.00162	-1.26333
chr9	49245065	49294330	Ttc12	2.64948	1.60091	-0.726816	chr9	49245065	49294330	Ttc12	9.50848	4.49174	-1.08194
chr18	12802041	12895561	Ttc39c	3.95957	2.45704	-0.688426	chr18	12802041	12895561	Ttc39c	2.28844	0.673765	-1.76405
chr4	106334412	106351549	Ttc4	29.1727	21.8183	-0.419078	chr4	106334412	106351549	Ttc4	35.2848	17.3347	-1.02538
chr11	86358492	86380862	Tubd1	4.40792	3.8173	-0.207544	chr11	86358492	86380862	Tubd1	1.84289	0.25104	-2.87598
chr17	6106829	6240637	Tulp4	16.6973	12.2939	-0.441668	chr17	6106829	6240637	Tulp4	37.1265	18.1122	-1.03549
chr19	45079503	45087254	Twnk	34.4375	24.6293	-0.483603	chr19	45079503	45087254	Twnk	97.0699	41.1412	-1.23844
chr14	45754122	45839100	Txndc16	2.7563	1.83644	-0.585823	chr14	45754122	45839100	Txndc16	2.29567	0.968637	-1.24489
chr5	130731488	130817437	Tyw1	6.19597	16.4728	1.41068	chr5	130731488	130817437	Tyw1	6.86596	3.0053	-1.19195
chr9	60642248	60728238	Uaca	5.99996	12.4719	1.05566	chr9	60642248	60728238	Uaca	4.88618	1.99172	-1.29469
chr2	25852477	25877280	Ubac1	19.3022	22.0545	0.192308	chr2	25852477	25877280	Ubac1	17.222	6.79618	-1.34146
chr11	116399066	116442761	Ube2o	15.6117	11.8437	-0.398513	chr11	116399066	116442761	Ube2o	22.7931	11.1211	-1.0353
chr2	130415731	130455774	Ubox5	5.22722	3.92856	-0.412044	chr2	130415731	130455774	Ubox5	23.3963	8.92467	-1.39041
chr2	181303858	181327166	Uckl1	10.1983	8.87945	-0.199785	chr2	181303858	181327166	Uckl1	25.6609	10.8396	-1.24326
chr19	3935185	3949340	Unc93b1	23.9291	27.8829	0.220614	chr19	3935185	3949340	Unc93b1	77.6177	36.1955	-1.10057
chr16	90751771	90810658	Urb1	7.92961	4.37144	-0.859143	chr16	90751771	90810658	Urb1	13.5186	6.29574	-1.1025
chr8	126545396	126572405	Urb2	6.21872	7.23027	0.217431	chr8	126545396	126572405	Urb2	26.2687	10.0716	-1.38305
chr16	44173509	44227578	Usf3	5.63501	2.67084	-1.07712	chr16	44173509	44227578	Usf3	4.4652	2.08218	-1.10063
chrX	20281034	20297665	Usp11	11.4683	5.2808	-1.11882	chrX	20281034	20297665	Usp11	14.1033	5.79834	-1.28232
chr16	87455229	87496114	Usp16	22.1313	15.7014	-0.495193	chr16	87455229	87496114	Usp16	34.5434	13.9454	-1.30862
chr9	108393006	108404668	Usp19	53.9759	34.8788	-0.629965	chr9	108393006	108404668	Usp19	56.1807	22.5713	-1.31558
chr5	74396061	74464436	Usp46	3.91466	4.80013	0.294186	chr5	74396061	74464436	Usp46	1.61016	0.208468	-2.94931
chrX	45610110	45638603	Utp14a	24.1762	21.9496	-0.139397	chrX	45610110	45638603	Utp14a	69.6826	34.1347	-1.02956
chr1	78654399	78704318	Utp14b	3.24128	1.38484	-1.22684	chr1	78654399	78704318	Utp14b	4.38783	1.6674	-1.39591
chr7	106035252	106289654	Uvrag	7.75135	5.83758	-0.409077	chr7	106035252	106289654	Uvrag	7.13653	3.46859	-1.04087
chr17	35792579	35804537	Vars2	13.012	7.21868	-0.850041	chr17	35792579	35804537	Vars2	13.3577	4.12656	-1.69466
chr13	89794914	89882117	Vcan	11.4385	16.2471	0.506282	chr13	89794914	89882117	Vcan	82.3102	36.3711	-1.17828
chr12	88579824	88607236	Vipas39	13.2635	11.7363	-0.176482	chr12	88579824	88607236	Vipas39	11.8888	4.84793	-1.29417
chr4	11413104	11478290	Virma	9.79271	13.6814	0.482432	chr4	11413104	11478290	Virma	34.9972	16.3992	-1.09361
chr9	44155831	44169753	Vps11	22.7713	11.9589	-0.929138	chr9	44155831	44169753	Vps11	30.1062	14.0697	-1.09747
chr15	35300872	35860984	Vps13b	1.85424	1.30192	-0.510189	chr15	35300872	35860984	Vps13b	2.67017	1.18306	-1.17441
chr5	135548769	135554136	Vps37d	8.82033	3.83694	-1.20088	chr5	135548769	135554136	Vps37d	8.21939	2.3329	-1.81691
chr6	3448392	3553531	Vps50	17.2056	9.746	-0.819995	chr6	3448392	3553531	Vps50	24.1855	11.919	-1.02088
chr17	34092744	34103983	Vps52	21.0412	17.5813	-0.259171	chr17	34092744	34103983	Vps52	31.4866	11.3397	-1.47336
chr11	26287083	26493920	Vrk2	2.73155	9.63847	1.81908	chr11	26287083	26493920	Vrk2	3.17283	1.5398	-1.04303
chr4	155142603	155148670	Vwa1	5.46358	3.41055	-0.679841	chr4	155142603	155148670	Vwa1	5.97608	1.20364	-2.31179
chr7	136735376	136779252	Wdr11	12.7212	7.69195	-0.725817	chr7	136735376	136779252	Wdr11	15.2706	7.3506	-1.05483
chr5	65590934	65651654	Wdr19	2.11255	1.14576	-0.882677	chr5	65590934	65651654	Wdr19	2.16489	0.0997834	-4.43935
chr12	110132481	110266662	Wdr25	4.15629	1.91961	-1.11449	chr12	110132481	110266662	Wdr25	5.53204	2.46152	-1.16826
chr4	62113665	62131933	Wdr31	2.79552	1.53279	-0.866956	chr4	62113665	62131933	Wdr31	1.58928	0.667765	-1.25096
chr2	29887077	29904399	Wdr34	15.1677	12.2585	-0.307225	chr2	29887077	29904399	Wdr34	13.5074	6.04552	-1.15981
chr12	8980806	9035653	Wdr35	11.923	6.97855	-0.772748	chr12	8980806	9035653	Wdr35	38.6049	13.9495	-1.46857
chr13	95746298	95793271	Wdr41	4.97506	6.49261	0.384084	chr13	95746298	95793271	Wdr41	14.3221	5.08473	-1.494
chrX	23270176	23383127	Wdr44	5.90525	3.2148	-0.877269	chrX	23270176	23383127	Wdr44	7.42459	2.33818	-1.66693
chr9	108472222	108481044	Wdr6	17.7442	25.2806	0.510681	chr9	108472222	108481044	Wdr6	117.528	42.8693	-1.45498
chr11	75254444	75268219	Wdr81	19.3623	8.74722	-1.14636	chr11	75254444	75268219	Wdr81	42.0767	14.7262	-1.51464
chr4	63075943	63157025	Whrn	11.8492	7.02154	-0.754932	chr4	63075943	63157025	Whrn	43.4363	14.1886	-1.61417
chrX	70437517	70448269	Xlr3b	4.44125	1.08289	-2.03608	chrX	70437517	70448269	Xlr3b	1.40978	0.297108	-2.24641
chr6	91439301	91465882	Xpc	5.89826	3.82157	-0.626123	chr6	91439301	91465882	Xpc	7.90815	3.64423	-1.11773
chr7	133245232	133344015	Xpo6	36.0913	24.7413	-0.544731	chr7	133245232	133344015	Xpo6	61.5776	23.3661	-1.39799
chr7	25331717	25358457	Xrcc1	36.2892	40.4887	0.15798	chr7	25331717	25358457	Xrcc1	63.4979	27.3123	-1.21716
chr13	89988518	90229213	Xrcc4	3.25112	9.84179	1.59799	chr13	89988518	90229213	Xrcc4	5.04388	1.87753	-1.4257
chr9	119266498	119302915	Xylb	3.35046	2.37678	-0.495352	chr9	119266498	119302915	Xylb	3.06518	1.09685	-1.48261
chr17	56092045	56107374	Yju2	4.60741	9.9797	1.11504	chr17	56092045	56107374	Yju2	10.614	3.04797	-1.80004
chr1	132585619	132625830	Yod1	3.86402	0.48875	-2.98293	chr1	132585619	132625830	Yod1	1.03072	0.0578722	-4.15464
chr12	77471506	77497942	Zbtb1	16.6638	13.8541	-0.266403	chr12	77471506	77497942	Zbtb1	16.4906	6.88645	-1.25982
chr16	55973380	56009025	Zbtb11os1	0.499922	3.2732	2.71093	chr16	55973380	56009025	Zbtb11os1	1.35073	0.550691	-1.29442
chr4	141000587	141094512	Zbtb17	20.5475	10.1342	-1.01973	chr4	141000587	141094512	Zbtb17	24.5503	9.58999	-1.35614
chr10	41170163	41185388	Zbtb24	10.3482	6.56729	-0.656011	chr10	41170163	41185388	Zbtb24	9.92563	4.1999	-1.2408
chr19	8877002	8879336	Zbtb3	2.1154	1.78463	-0.245306	chr19	8877002	8879336	Zbtb3	2.84012	0.620854	-2.19363
chr12	113917050	113920958	Zbtb42	2.85676	2.42057	-0.239036	chr12	113917050	113920958	Zbtb42	3.88439	1.33466	-1.54121
chr3	89181565	89202701	Zbtb7b	16.9218	14.7863	-0.194615	chr3	89181565	89202701	Zbtb7b	101.146	40.4269	-1.32306
chr1	63229144	63361149	Zdbf2	2.96308	2.67711	-0.146422	chr1	63229144	63361149	Zdbf2	3.83037	1.51979	-1.33361
chr2	29952802	29980131	Zer1	6.73848	5.31543	-0.342235	chr2	29952802	29980131	Zer1	10.0705	3.63211	-1.47125
chr5	139947169	139960445	Zfand2a	10.9473	6.67288	-0.714198	chr5	139947169	139960445	Zfand2a	8.13283	2.58093	-1.65587
chr1	75165219	75168200	Zfand2b	10.1439	11.4597	0.175959	chr1	75165219	75168200	Zfand2b	25.4589	7.43914	-1.77496
chr7	49728755	49761123	Zfp141	6.52512	2.24995	-1.53611	chr7	49728755	49761123	Zfp141	6.43332	2.03939	-1.65743
chr11	50712213	50729678	Zfp2	3.67895	1.70377	-1.11056	chr11	50712213	50729678	Zfp2	1.47027	0.578261	-1.34628
chr6	47870566	47882636	Zfp212	15.4492	9.93576	-0.636833	chr6	47870566	47882636	Zfp212	45.6895	15.9148	-1.5215
chr14	52604507	52640408	Zfp219	53.9461	25.9905	-1.05353	chr14	52604507	52640408	Zfp219	95.095	34.3189	-1.47037
chr15	76682573	76701865	Zfp251	8.42768	5.43448	-0.632994	chr15	76682573	76701865	Zfp251	7.78079	3.59678	-1.11321
chr2	164717391	164737250	Zfp335	20.3734	5.58871	-1.8661	chr2	164717391	164737250	Zfp335	22.5552	6.18369	-1.86692
chr2	154439103	154472553	Zfp341	4.87985	2.68762	-0.86051	chr2	154439103	154472553	Zfp341	3.95287	1.86053	-1.08719
chr13	65380161	65399103	Zfp369	1.17841	0.163783	-2.84698	chr13	65380161	65399103	Zfp369	2.17893	0.0788492	-4.78838
chr17	84583268	84587287	Zfp36l2	81.6215	77.5709	-0.0734333	chr17	84583268	84587287	Zfp36l2	87.517	42.8932	-1.02882
chr6	124959143	124999871	Zfp384	53.2136	21.6518	-1.29731	chr6	124959143	124999871	Zfp384	60.9084	24.2364	-1.32947
chr6	47785659	47818256	Zfp398	2.216	0.699371	-1.66383	chr6	47785659	47818256	Zfp398	2.12893	0.217358	-3.29199
chr18	84377093	84758896	Zfp407	2.76491	2.13027	-0.376194	chr18	84377093	84758896	Zfp407	25.2282	7.37793	-1.77375
chr15	75447113	75455730	Zfp41	6.34115	4.10077	-0.628849	chr15	75447113	75455730	Zfp41	2.47249	0.499724	-2.30676
chr11	50686224	50701003	Zfp454	2.65947	1.34228	-0.986455	chr11	50686224	50701003	Zfp454	2.3021	0.52826	-2.12363
chr8	124754173	124796550	Zfp469	1.05444	0.459284	-1.19902	chr8	124754173	124796550	Zfp469	4.26455	1.49346	-1.51374
chr5	31754808	31784126	Zfp512	25.3547	11.5556	-1.13366	chr5	31754808	31784126	Zfp512	36.7194	13.0204	-1.49576
chr17	28264295	28438414	Zfp523	9.404	3.95139	-1.25092	chr17	28264295	28438414	Zfp523	10.7811	3.65745	-1.5596
chr7	4967109	4970090	Zfp524	9.05117	13.4801	0.57465	chr7	4967109	4970090	Zfp524	6.41841	2.3566	-1.44551
chr7	26006443	26012514	Zfp526	2.56064	1.9684	-0.379481	chr7	26006443	26012514	Zfp526	1.2326	0.263881	-2.22375
chr7	6267266	6282036	Zfp583	3.73454	2.50432	-0.57651	chr7	6267266	6282036	Zfp583	1.8378	0.244544	-2.90981
chr7	28623602	28641793	Zfp59	6.14863	1.79956	-1.77262	chr7	28623602	28641793	Zfp59	7.0055	1.32854	-2.39865
chr17	24806631	24818968	Zfp598	50.6623	23.1193	-1.13181	chr17	24806631	24818968	Zfp598	86.0259	37.7371	-1.18879
chr2	168718830	168781087	Zfp64	11.2156	15.0688	0.426064	chr2	168718830	168781087	Zfp64	15.4986	6.02071	-1.36413
chr7	135021214	135034484	Zfp646	8.53943	6.54227	-0.384348	chr7	135021214	135034484	Zfp646	26.3229	7.81206	-1.75254
chr11	95610380	95626027	Zfp652	2.30008	3.47094	0.593643	chr11	95610380	95626027	Zfp652	4.07195	1.87104	-1.12188
chr15	75799552	75806298	Zfp707	19.2607	5.73091	-1.74882	chr15	75799552	75806298	Zfp707	22.6689	6.37602	-1.82999
chr13	67717937	67738718	Zfp729a	2.07712	1.20951	-0.780157	chr13	67717937	67738718	Zfp729a	4.79991	2.39129	-1.00522
chr13	67690375	67710644	Zfp729b	1.936	1.06603	-0.860834	chr13	67690375	67710644	Zfp729b	5.45048	2.05533	-1.40701
chr17	22498419	22514248	Zfp758	4.23498	2.34815	-0.850829	chr17	22498419	22514248	Zfp758	1.92971	0.465224	-2.05239
chr13	67229163	67242723	Zfp759	1.97996	0.393243	-2.33198	chr13	67229163	67242723	Zfp759	1.71215	0.128009	-3.74149
chr7	134388039	134398385	Zfp771	18.72	21.8039	0.220003	chr7	134388039	134398385	Zfp771	30.3268	12.7339	-1.25192
chr17	33470672	33495823	Zfp81	5.41392	1.78781	-1.59848	chr17	33470672	33495823	Zfp81	3.69115	1.11289	-1.72976
chr9	20385771	20399637	Zfp846	4.04803	2.78009	-0.542091	chr9	20385771	20399637	Zfp846	2.44942	0.978651	-1.32357
chr8	72285222	72298810	Zfp866	5.90424	1.93665	-1.60819	chr8	72285222	72298810	Zfp866	5.15151	1.60162	-1.68546
chr10	81510867	81524331	Zfp873	2.0511	0.560068	-1.87272	chr10	81510867	81524331	Zfp873	1.59391	0.397936	-2.00196
chr7	25086722	25101685	Zfp94	2.69723	1.52769	-0.82012	chr7	25086722	25101685	Zfp94	4.48358	1.03701	-2.11223
chr17	22099525	22131333	Zfp943	5.21847	3.09443	-0.753952	chr17	22099525	22131333	Zfp943	3.15666	1.40233	-1.17057
chr7	7067393	7074187	Zfp954	6.70381	5.56793	-0.267841	chr7	7067393	7074187	Zfp954	7.56855	1.83036	-2.04789
chr17	33376451	33392090	Zfp955a	6.64716	3.21818	-1.04649	chr17	33376451	33392090	Zfp955a	5.91042	2.51342	-1.23361
chr17	21787577	21801933	Zfp983	1.68552	0.741795	-1.1841	chr17	21787577	21801933	Zfp983	1.38946	0.497613	-1.48143
chr12	84887505	84938172	Zfyve1	15.2576	6.11602	-1.31887	chr12	84887505	84938172	Zfyve1	59.4811	20.5004	-1.53678
chr13	93257703	93300765	Zfyve16	7.81937	3.09609	-1.33661	chr13	93257703	93300765	Zfyve16	14.8086	4.69779	-1.65638
chr9	20866836	20871537	Zglp1	1.74225	1.6027	-0.120447	chr9	20866836	20871537	Zglp1	8.07206	2.65265	-1.6055
chr2	181092394	181115498	Zgpat	15.3976	9.36978	-0.716621	chr2	181092394	181115498	Zgpat	21.3432	3.49587	-2.61006
chr4	126420993	126645167	Zmym4	6.50155	6.69028	0.0412849	chr4	126420993	126645167	Zmym4	7.95206	2.8215	-1.49486
chr5	146044211	146052338	Zscan25	7.85141	3.01693	-1.37987	chr5	146044211	146052338	Zscan25	8.30301	2.80157	-1.5674

## Sheet: SC YTHDC1 targets
Supplementary Table S4. Analysis of YTHDC1 mRNA nuclear export in ASC and C2C12 myoblasts
Cyto/Nuc ratio of all expressed YTHDC1 target mRNAs in iKO vs. Ctrl ASC.
Ctrl							iKO
chr	start	end	gene	nuc FPKM	cyto FPKM	log2(cyto/nuc)	chr	start	end	gene	nuc FPKM	cyto FPKM	log2(cyto/nuc)
chr17	35087180	35089416	1110038B12Rik	347.288	244.031	-0.50907	chr17	35087180	35089416	1110038B12Rik	271.365	375.451	0.468394
chr6	86477323	86514443	1600020E01Rik	25.0491	4.06746	-2.62256	chr6	86477323	86514443	1600020E01Rik	34.6781	12.8861	-1.42821
chr11	62416378	62418308	2410006H16Rik	327.777	368.035	0.167125	chr11	62416378	62418308	2410006H16Rik	379.654	427.982	0.172863
chr11	95720130	95722360	4833417C18Rik	13.9053	0.404804	-5.10226	chr11	95720130	95722360	4833417C18Rik	1.5637	2.46474	0.656468
chr2	6460743	7317825	5031426D15Rik	12.5544	0.29978	-5.38814	chr2	6460743	7317825	5031426D15Rik	9.78178	8.88052	-0.139453
chr5	48780741	49676898	5730480H06Rik	7.8138	0.860707	-3.18243	chr5	48780741	49676898	5730480H06Rik	7.13075	2.47134	-1.52876
chr15	12737931	12754412	6030458C11Rik	42.8171	7.20765	-2.57059	chr15	12737931	12754412	6030458C11Rik	30.5269	23.9432	-0.350464
chr1	56850824	57037092	9130024F11Rik	8.45805	0.24559	-5.106	chr1	56850824	57037092	9130024F11Rik	0.883822	2.36211	1.41825
chr9	68501592	69236053	9530091C08Rik	2.28214	0.00491289	-8.8596	chr9	68501592	69236053	9530091C08Rik	1.47581	0.481413	-1.61616
chr18	25327520	25625822	AW554918	2.61932	2.12094	-0.304487	chr18	25327520	25625822	AW554918	4.66904	2.46182	-0.923402
chr5	125956242	125997775	Aacs	13.648	11.1405	-0.292876	chr5	125956242	125997775	Aacs	16.0817	8.80345	-0.869275
chr11	109886947	109957251	Abca8a	1.39849	0.835173	-0.743719	chr11	109886947	109957251	Abca8a	2.37931	1.30034	-0.871657
chr14	118881913	119105441	Abcc4	4.16632	2.64575	-0.655097	chr14	118881913	119105441	Abcc4	2.22023	2.10947	-0.0738303
chr3	121461821	121518220	Abcd3	11.2598	10.4786	-0.103734	chr3	121461821	121518220	Abcd3	14.3571	8.74152	-0.715809
chr18	74938865	74965861	Acaa2	15.7361	37.5851	1.25608	chr18	74938865	74965861	Acaa2	4.4733	11.5191	1.36461
chr9	54452803	54509692	Acsbg1	2.88137	1.87894	-0.616834	chr9	54452803	54509692	Acsbg1	9.82826	1.21623	-3.01452
chr11	94418415	94463100	Acsf2	4.16155	4.87824	0.22924	chr11	94418415	94463100	Acsf2	2.44239	1.38191	-0.821631
chr5	143664793	143668433	Actb	790.136	4225.33	2.41889	chr5	143664793	143668433	Actb	401.662	4398.4	3.45292
chr12	72038843	72065704	Actr10	11.0649	22.2693	1.00907	chr12	72038843	72065704	Actr10	8.16005	9.07222	0.152879
chr7	141074882	141416780	Adam12	2.33382	3.87475	0.731413	chr7	141074882	141416780	Adam12	2.02772	2.67581	0.40012
chr8	28196312	28233908	Adgra2	7.55516	7.64743	0.0175133	chr8	28196312	28233908	Adgra2	10.0122	9.97005	-0.00608547
chr8	97501008	97538108	Adgrg1	4.33898	5.38275	0.310987	chr8	97501008	97538108	Adgrg1	3.65363	3.341	-0.129054
chr6	119303167	119367546	Adipor2	16.0347	16.7964	0.0669567	chr6	119303167	119367546	Adipor2	8.2504	9.53086	0.208141
chr14	21871795	22267791	Adk	8.10412	71.0062	3.13122	chr14	21871795	22267791	Adk	7.85144	18.6987	1.25191
chr1	91351385	91791857	Agap1	7.71125	6.04287	-0.351732	chr1	91351385	91791857	Agap1	5.18423	5.49208	0.0832247
chr15	72932054	73015377	Ago2	3.19864	3.54755	0.149367	chr15	72932054	73015377	Ago2	2.91578	1.79605	-0.699054
chr17	32440616	32458183	Akap8	105.963	33.6165	-1.65632	chr17	32440616	32458183	Akap8	155.054	71.0122	-1.12663
chr7	109029838	109048059	Anapc15	25.3441	51.5195	1.02347	chr7	109029838	109048059	Anapc15	24.6196	17.0138	-0.533106
chr5	122872452	122894920	Anapc7	20.6672	28.7751	0.477477	chr5	122872452	122894920	Anapc7	18.3225	9.57355	-0.936489
chr3	126624524	127202033	Ank2	16.3347	4.62566	-1.8202	chr3	126624524	127202033	Ank2	5.10716	9.63279	0.915433
chr5	90656190	90795211	Ankrd17	16.9027	20.7209	0.293832	chr5	90656190	90795211	Ankrd17	17.3868	40.9793	1.2369
chr4	32891009	33037801	Ankrd6	3.87331	1.63777	-1.24184	chr4	32891009	33037801	Ankrd6	4.76814	3.91707	-0.283649
chr10	89336253	90436045	Anks1b	3.98087	0.0913	-5.44633	chr10	89336253	90436045	Anks1b	2.15279	0.974365	-1.14367
chr11	54792454	54846973	Anxa6	118.526	309.763	1.38596	chr11	54792454	54846973	Anxa6	104.528	77.5163	-0.431316
chr11	4838758	4942797	Ap1b1	24.9188	33.9855	0.447685	chr11	4838758	4942797	Ap1b1	24.2476	18.3628	-0.401057
chr8	112302482	112388109	Ap1g1	21.1056	12.3914	-0.768289	chr8	112302482	112388109	Ap1g1	13.7589	8.34384	-0.721583
chr5	66689963	67010056	Apbb2	17.9438	6.51338	-1.46201	chr5	66689963	67010056	Apbb2	8.48052	11.2905	0.412884
chr15	76845916	76887538	Apol6	13.3497	0.0917827	-7.18437	chr15	76845916	76887538	Apol6	0.20353	1.70879	3.06966
chr14	27457619	27476328	Arf4	44.4874	194.424	2.12774	chr14	27457619	27476328	Arf4	19.463	55.5767	1.51374
chr7	130422662	130513429	Arhgap17	17.6344	11.4449	-0.623691	chr7	130422662	130513429	Arhgap17	16.2787	9.80025	-0.732091
chr2	20769545	20889348	Arhgap21	15.1249	9.22073	-0.713971	chr2	20769545	20889348	Arhgap21	15.6747	8.95237	-0.8081
chr15	76554414	76648596	Arhgap39	5.21401	2.89254	-0.850057	chr15	76554414	76648596	Arhgap39	9.00681	5.65237	-0.67216
chr11	64792536	64976463	Arhgap44	7.43224	1.72203	-2.10969	chr11	64792536	64976463	Arhgap44	4.31999	3.63818	-0.24781
chr9	42771924	42913801	Arhgef12	11.5881	14.0423	0.277136	chr9	42771924	42913801	Arhgef12	12.4021	11.417	-0.119397
chr8	3353436	3456601	Arhgef18	10.0021	4.04955	-1.30447	chr8	3353436	3456601	Arhgef18	9.42206	3.05024	-1.62712
chr14	27957178	28217097	Arhgef3	3.21379	1.44596	-1.15224	chr14	27957178	28217097	Arhgef3	1.19161	1.02871	-0.212072
chr8	11728057	11835217	Arhgef7	23.5287	20.5908	-0.192422	chr8	11728057	11835217	Arhgef7	16.2596	12.2123	-0.412949
chr9	59236360	59334181	Arih1	21.8944	20.1743	-0.118045	chr9	59236360	59334181	Arih1	16.5202	9.98782	-0.725989
chr1	88051354	88174859	Armc9	3.00954	1.98681	-0.599087	chr1	88051354	88174859	Armc9	6.32312	2.05199	-1.62361
chr19	45892633	46087876	Armh3	2.64987	2.93269	0.146302	chr19	45892633	46087876	Armh3	2.89288	3.631	0.327861
chr7	91394784	91558548	Arnt2	2.86542	3.25335	0.183178	chr7	91394784	91558548	Arnt2	1.3908	1.47301	0.0828499
chr1	74283090	74314783	Arpc2	74.5354	351.438	2.23727	chr1	74283090	74314783	Arpc2	67.2696	169.19	1.33062
chr16	18348274	18479166	Arvcf	5.79635	2.48113	-1.22415	chr16	18348274	18479166	Arvcf	7.97239	4.58386	-0.79845
chr15	63918401	64214481	Asap1	7.02062	6.47081	-0.11765	chr15	63918401	64214481	Asap1	7.02666	5.80181	-0.276337
chr12	21117616	21292145	Asap2	4.70548	2.23387	-1.0748	chr12	21117616	21292145	Asap2	3.19853	2.634	-0.280156
chr10	53256120	53349763	Asf1a	8.43241	30.9273	1.87486	chr10	53256120	53349763	Asf1a	5.16132	16.9644	1.7167
chr3	88769733	88883297	Ash1l	7.48582	6.41625	-0.222431	chr3	88769733	88883297	Ash1l	24.2655	10.7437	-1.17541
chr12	70847834	71087989	Atl1	1.88865	0.534684	-1.8206	chr12	70847834	71087989	Atl1	2.9816	0.80069	-1.89677
chr16	30312509	30388616	Atp13a3	36.2837	34.7866	-0.0607906	chr16	30312509	30388616	Atp13a3	23.4569	34.2302	0.545261
chr1	166237802	166388486	Atp1b1	10.0708	7.00743	-0.52322	chr1	166237802	166388486	Atp1b1	2.21521	7.53243	1.76567
chr17	26813340	26836591	Atp6v0e	21.7585	174.851	3.00647	chr17	26813340	26836591	Atp6v0e	21.1868	44.1218	1.05833
chr3	89743409	89767260	Atp8b2	17.4761	11.721	-0.57628	chr3	89743409	89767260	Atp8b2	17.4415	10.7835	-0.693694
chr5	131913202	133019090	Auts2	21.4377	14.6696	-0.547323	chr5	131913202	133019090	Auts2	13.7706	19.6648	0.514024
chr17	26275630	26332756	Axin1	15.5945	16.4251	0.0748669	chr17	26275630	26332756	Axin1	16.5096	9.24935	-0.835878
chr9	117949639	118059314	Azi2	13.617	12.9639	-0.0709104	chr9	117949639	118059314	Azi2	14.8474	15.8933	0.0982087
chr10	12636443	12642925	B230208H11Rik	2.05145	2.99657	0.546673	chr10	12636443	12642925	B230208H11Rik	1.0326	0.965936	-0.0962873
chr13	55794484	55804861	B230219D22Rik	24.2216	28.389	0.229042	chr13	55794484	55804861	B230219D22Rik	8.95035	21.0329	1.23263
chr11	121313304	121534465	B3gntl1	11.9669	2.59451	-2.20551	chr11	121313304	121534465	B3gntl1	14.0207	5.50324	-1.3492
chr2	115407451	115604504	BC052040	2.29155	7.0398	1.61921	chr2	115407451	115604504	BC052040	2.64808	2.27927	-0.216375
chr16	87699198	87733591	Bach1	7.30726	5.27133	-0.471164	chr16	87699198	87733591	Bach1	5.96396	6.77109	0.183117
chr5	135663192	135721999	Baz1b	76.3812	36.1959	-1.07739	chr5	135663192	135721999	Baz1b	48.1549	31.6643	-0.604825
chr2	59737419	59963797	Baz2b	7.79863	4.0413	-0.948402	chr2	59737419	59963797	Baz2b	11.1631	12.3774	0.148973
chr19	53966720	54107768	Bbip1	6.29634	13.0745	1.05417	chr19	53966720	54107768	Bbip1	3.83064	5.85045	0.610962
chr16	50191956	50432579	Bbx	6.52303	11.085	0.765	chr16	50191956	50432579	Bbx	5.86261	20.9938	1.84035
chr6	144942354	145024677	Bcat1	7.53356	8.26823	0.134247	chr6	144942354	145024677	Bcat1	3.30097	4.24787	0.363849
chr7	52823164	52845080	Bcat2	29.7544	21.6723	-0.457253	chr7	52823164	52845080	Bcat2	36.985	29.6793	-0.317483
chr9	83818743	84017847	Bckdhb	17.6005	12.6711	-0.474069	chr9	83818743	84017847	Bckdhb	55.6719	26.8561	-1.0517
chr5	123794456	123824092	Bcl7a	45.7089	21.2574	-1.10451	chr5	123794456	123824092	Bcl7a	63.1304	34.2484	-0.882299
chr7	134804967	134852280	Bcl7c	20.4782	143.407	2.80796	chr7	134804967	134852280	Bcl7c	26.5357	54.2589	1.03192
chr10	74523640	74647668	Bcr	3.41745	2.62856	-0.378648	chr10	74523640	74647668	Bcr	4.49719	2.77679	-0.695606
chr6	108527029	108616919	Bhlhe40	12.7866	10.0181	-0.352026	chr6	108527029	108616919	Bhlhe40	27.7943	19.8565	-0.485175
chr1	59821122	59934925	Bmpr2	3.94398	7.71397	0.96782	chr1	59821122	59934925	Bmpr2	2.78856	5.71986	1.03646
chr16	44485157	44558983	Boc	6.66537	5.01472	-0.410514	chr16	44485157	44558983	Boc	12.2919	8.63757	-0.509008
chr6	39553236	39675462	Braf	5.49902	2.54502	-1.1115	chr6	39553236	39675462	Braf	3.13524	6.32086	1.01154
chr17	32333216	32421078	Brd4	44.5224	72.3626	0.700714	chr17	32333216	32421078	Brd4	52.6636	158.271	1.58752
chr19	37000568	37088547	Btaf1	17.9917	6.63228	-1.43976	chr19	37000568	37088547	Btaf1	18.1931	9.6191	-0.919417
chr17	30352468	30713232	Btbd9	5.98055	4.52583	-0.402095	chr17	30352468	30713232	Btbd9	4.81941	10.8677	1.17312
chr6	142959439	143048672	C2cd5	12.1528	4.63806	-1.38969	chr6	142959439	143048672	C2cd5	10.9284	5.79158	-0.916048
chr4	128896821	128938648	C77080	8.10236	4.17804	-0.955517	chr4	128896821	128938648	C77080	7.25554	5.71942	-0.343215
chr11	107593670	107656020	Cacng4	6.09211	1.78895	-1.76783	chr11	107593670	107656020	Cacng4	0.703966	2.88783	2.03641
chr15	102537207	102552609	Calcoco1	22.0619	25.7745	0.22439	chr15	102537207	102552609	Calcoco1	13.9621	13.5621	-0.0419353
chr17	85489965	85857929	Camkmt	2.6415	3.25641	0.301926	chr17	85489965	85857929	Camkmt	6.53994	2.81283	-1.21725
chr4	150433631	151235877	Camta1	5.3615	8.94747	0.738844	chr4	150433631	151235877	Camta1	1.93398	4.99994	1.37034
chr11	98656829	98695121	Casc3	40.819	25.4614	-0.680927	chr11	98656829	98695121	Casc3	42.5388	28.4921	-0.578219
chr2	154262219	154365092	Cbfa2t2	9.51148	6.23479	-0.609328	chr2	154262219	154365092	Cbfa2t2	4.11766	4.29663	0.0613795
chr16	93683463	93691236	Cbr3	7.71205	40.7478	2.40154	chr16	93683463	93691236	Cbr3	12.4719	11.882	-0.0699012
chr15	103021976	103070283	Cbx5	38.8412	39.7079	0.0318389	chr15	103021976	103070283	Cbx5	13.6721	21.8091	0.673696
chr19	5447697	5457563	Ccdc85b	29.7569	41.5443	0.481427	chr19	5447697	5457563	Ccdc85b	43.0694	42.4791	-0.0199102
chr19	6919112	6932701	Ccdc88b	1.00343	0.703685	-0.511935	chr19	6919112	6932701	Ccdc88b	2.09026	0.527369	-1.9868
chr17	45528838	45570656	Cdc5l	21.0604	37.5851	0.835628	chr17	45528838	45570656	Cdc5l	14.0669	25.4052	0.852822
chr8	120807510	121848827	Cdh13	6.14429	16.6945	1.44205	chr8	120807510	121848827	Cdh13	12.0714	24.4829	1.02017
chr10	128134994	128142107	Cdk2	85.511	38.5676	-1.14872	chr10	128134994	128142107	Cdk2	48.6455	27.9339	-0.800291
chr5	147042825	147114450	Cdk8	45.3486	26.1778	-0.792715	chr5	147042825	147114450	Cdk8	66.7169	43.2882	-0.624078
chr2	6460743	7317825	Celf2	24.7884	50.1716	1.01721	chr2	6460743	7317825	Celf2	15.5273	79.8186	2.36192
chr13	101529628	101545854	Cenph	21.2626	31.854	0.583156	chr13	101529628	101545854	Cenph	17.6566	10.9083	-0.694776
chr8	47637422	47702581	Cenpu	9.15358	3.00983	-1.60466	chr8	47637422	47702581	Cenpu	2.3728	2.15532	-0.138686
chr11	108286579	108721929	Cep112	4.24778	2.87686	-0.562216	chr11	108286579	108721929	Cep112	3.08286	0.526381	-2.55009
chr9	8076631	8134446	Cep126	4.61001	0.701819	-2.7156	chr9	8076631	8134446	Cep126	4.51256	1.32648	-1.76635
chr5	77017723	77075491	Cep135	4.36783	2.44008	-0.839989	chr5	77017723	77075491	Cep135	2.30659	2.25427	-0.0331007
chr1	157692093	157820385	Cep350	3.28693	2.76126	-0.251414	chr1	157692093	157820385	Cep350	2.73582	2.83171	0.0497007
chr19	38129473	38148915	Cep55	34.4348	28.4792	-0.273957	chr19	38129473	38148915	Cep55	12.6086	12.5644	-0.00506632
chr9	102488907	102528454	Cep63	19.5022	8.97366	-1.11987	chr9	102488907	102528454	Cep63	15.8768	8.77119	-0.856079
chr18	67247951	67405484	Chmp1b	8.10103	18.0998	1.1598	chr18	67247951	67405484	Chmp1b	3.90662	12.3325	1.65847
chr2	119373442	119412758	Chp1	14.8155	41.2084	1.47584	chr2	119373442	119412758	Chp1	7.44937	21.4083	1.52298
chr5	116295664	116456350	Cit	8.20551	1.59922	-2.35923	chr5	116295664	116456350	Cit	3.66899	2.13097	-0.783873
chrX	6735537	6896484	Clcn5	7.50348	4.39539	-0.771569	chrX	6735537	6896484	Clcn5	5.58387	2.65273	-1.07379
chr5	124027802	124134370	Clip1	13.7541	10.0352	-0.454797	chr5	124027802	124134370	Clip1	11.061	8.94134	-0.306918
chr9	117949639	118059314	Cmc1	5.72461	12.7081	1.15049	chr9	117949639	118059314	Cmc1	0.782766	6.21077	2.98812
chr16	57302112	57606980	Cmss1	5.42682	34.2592	2.65831	chr16	57302112	57606980	Cmss1	8.02068	5.47035	-0.55209
chr6	87792608	87801100	Cnbp	182.944	389.432	1.08996	chr6	87792608	87801100	Cnbp	140.981	200.222	0.506094
chr11	113106168	113545465	Cog1	9.0797	11.5766	0.3505	chr11	113106168	113545465	Cog1	21.7097	13.1681	-0.721296
chr6	4455617	4491543	Col1a2	38.2762	16.0484	-1.25402	chr6	4455617	4491543	Col1a2	28.7151	50.5415	0.815661
chr2	27741944	27895030	Col5a1	20.5937	8.66541	-1.24886	chr2	27741944	27895030	Col5a1	17.6765	13.7585	-0.361512
chr11	22799727	22882284	Commd1	20.1163	137.084	2.76862	chr11	22799727	22882284	Commd1	13.2576	40.7096	1.61855
chr16	18348274	18479166	Comt	35.658	62.6219	0.812443	chr16	18348274	18479166	Comt	39.2112	83.175	1.08489
chr6	30683505	30846794	Copg2	4.70968	10.0939	1.09978	chr6	30683505	30846794	Copg2	5.38903	6.11552	0.182447
chr5	114292447	114358715	Coro1c	58.0716	107.632	0.890201	chr5	114292447	114358715	Coro1c	25.5257	33.8725	0.408161
chr9	62267298	62384851	Coro2b	3.46757	3.05575	-0.182399	chr9	62267298	62384851	Coro2b	1.18257	3.04702	1.36548
chr10	117066555	117124408	Cpm	2.6305	0.167801	-3.97052	chr10	117066555	117124408	Cpm	2.1489	0.74821	-1.52208
chr2	155897576	155937701	Cpne1	46.2874	48.0022	0.0524793	chr2	155897576	155937701	Cpne1	31.0684	25.4054	-0.290313
chr5	130505175	130536653	Crcp	12.3721	24.4885	0.985013	chr5	130505175	130536653	Crcp	10.4586	16.7599	0.68033
chr6	53237296	53650357	Creb5	3.81785	0.96909	-1.97806	chr6	53237296	53650357	Creb5	2.35165	4.03737	0.779739
chr9	114277441	114299830	Crtap	10.8982	62.7545	2.52563	chr9	114277441	114299830	Crtap	9.66333	38.9886	2.01246
chr7	87731517	87833763	Crtc3	11.0144	6.6132	-0.735974	chr7	87731517	87833763	Crtc3	9.48368	5.78252	-0.71375
chr16	59471600	59600873	Crybg3	2.27051	2.24086	-0.0189644	chr16	59471600	59600873	Crybg3	6.66573	3.07911	-1.11425
chr7	140178693	140315166	Ctbp2	29.7484	63.1421	1.08579	chr7	140178693	140315166	Ctbp2	36.3586	89.9631	1.30704
chr8	108148235	108206822	Ctcf	27.1575	38.4729	0.502492	chr8	108148235	108206822	Ctcf	18.6341	23.5539	0.338024
chr2	121779506	121841062	Ctdspl2	14.7214	7.36725	-0.998717	chr2	121779506	121841062	Ctdspl2	5.56487	4.46293	-0.318355
chr18	75590870	75857350	Ctif	5.49209	7.15591	0.381782	chr18	75590870	75857350	Ctif	3.0043	4.5625	0.602795
chr9	120842517	120869625	Ctnnb1	93.724	286.823	1.61367	chr9	120842517	120869625	Ctnnb1	57.3581	109.644	0.934755
chr9	89949104	89970933	Ctsh	2.29993	8.35866	1.86168	chr9	89949104	89970933	Ctsh	7.541	7.23267	-0.0602289
chr5	136724004	137043360	Cux1	19.8412	39.2482	0.984131	chr5	136724004	137043360	Cux1	24.2382	27.6793	0.191525
chr13	105421219	105607033	Cwc27	15.0763	19.3434	0.359558	chr13	105421219	105607033	Cwc27	11.6262	14.3599	0.304673
chr13	56390005	56397912	Cxcl14	0.392108	2.22293	2.50314	chr13	56390005	56397912	Cxcl14	1.2115	1.93622	0.67645
chr1	74760108	74784471	Cyp27a1	3.42734	0.92917	-1.88308	chr1	74760108	74784471	Cyp27a1	9.39942	4.10765	-1.19426
chr6	115551955	115628385	D830050J10Rik	18.4243	1.05092	-4.13189	chr6	115551955	115628385	D830050J10Rik	0.837151	1.30933	0.645268
chr9	108107191	108166289	Dag1	24.4525	66.4116	1.44145	chr9	108107191	108166289	Dag1	9.8504	18.6243	0.918931
chr15	100446092	100451192	Dazap2	29.297	98.5791	1.75053	chr15	100446092	100451192	Dazap2	10.7994	20.0305	0.891245
chr9	106724254	106783323	Dcaf1	8.44083	8.65	0.0353152	chr9	106724254	106783323	Dcaf1	16.4312	7.15065	-1.20029
chr4	41238332	41261934	Dcaf12	22.8183	23.6044	0.0488641	chr4	41238332	41261934	Dcaf12	14.222	15.2569	0.101334
chr6	118537257	119171632	Dcp1b	2.73848	1.11197	-1.30026	chr6	118537257	119171632	Dcp1b	4.4412	1.34091	-1.72773
chr9	52906558	53056217	Ddx10	7.35835	16.2248	1.14074	chr9	52906558	53056217	Ddx10	7.93843	9.96617	0.328185
chr2	37631768	38142904	Dennd1a	4.99409	3.10973	-0.683433	chr2	37631768	38142904	Dennd1a	7.39108	3.48463	-1.08478
chr1	140860285	141072619	Dennd1b	3.44008	0.716744	-2.26291	chr1	140860285	141072619	Dennd1b	0.942653	1.2353	0.390063
chr14	99475852	99653713	Dis3	15.3211	18.222	0.250154	chr14	99475852	99653713	Dis3	8.50909	7.76139	-0.13269
chr14	24953174	25065142	Dlg5	13.2117	11.0976	-0.25156	chr14	24953174	25065142	Dlg5	32.2463	11.1947	-1.52631
chr2	17976863	18314457	Dnajc1	11.843	8.99532	-0.396789	chr2	17976863	18314457	Dnajc1	16.1494	19.1316	0.244479
chr15	10376517	10400271	Dnajc21	17.952	38.0236	1.08275	chr15	10376517	10400271	Dnajc21	23.1167	33.1136	0.518486
chr12	3806979	3914443	Dnmt3a	6.2609	2.59744	-1.26928	chr12	3806979	3914443	Dnmt3a	4.57135	1.3274	-1.78402
chr7	141862369	142365330	Dock1	4.73632	6.03947	0.350657	chr7	141862369	142365330	Dock1	3.93236	3.5627	-0.142427
chr4	98603349	98787616	Dock7	10.8156	8.03256	-0.429185	chr4	98603349	98787616	Dock7	11.0749	7.21604	-0.618013
chr1	33965069	34365507	Dst	23.4318	9.47365	-1.30648	chr1	33965069	34365507	Dst	23.4602	18.4605	-0.345773
chr12	3572390	3785484	Dtnb	8.53704	3.96534	-1.10629	chr12	3572390	3785484	Dtnb	3.6965	2.81622	-0.392399
chr18	75178417	75446620	Dym	2.53095	13.0497	2.36626	chr18	75178417	75446620	Dym	3.46987	3.0209	-0.199903
chr17	6256859	6317474	Dynlt1a	0.927489	4.89548	2.40005	chr17	6256859	6317474	Dynlt1a	0.682075	2.15793	1.66165
chr9	99529949	99570494	Dzip1l	17.1396	5.86617	-1.54684	chr9	99529949	99570494	Dzip1l	8.62659	4.89562	-0.817299
chr9	96585841	96653250	E030011O05Rik	3.35719	1.6559	-1.01964	chr9	96585841	96653250	E030011O05Rik	2.50964	5.43198	1.114
chr10	39089604	39451813	E130307A14Rik	3.98233	1.40515	-1.50289	chr10	39089604	39451813	E130307A14Rik	4.39137	2.01151	-1.12639
chr13	29998443	30077932	E2f3	20.7607	14.4809	-0.519705	chr13	29998443	30077932	E2f3	13.1693	16.195	0.29837
chr7	56121798	56141978	E2f8	24.3295	27.7078	0.187588	chr7	56121798	56141978	E2f8	7.94685	9.99837	0.331309
chr9	121628298	121669061	E530011L22Rik	14.0949	0.428337	-5.04028	chr9	121628298	121669061	E530011L22Rik	10.7994	4.214	-1.35769
chr4	58810105	58925621	Ecpas	13.9352	12.2557	-0.185284	chr4	58810105	58925621	Ecpas	14.0255	10.6182	-0.401509
chr7	127986344	128050733	Eef2k	8.37975	5.13346	-0.706975	chr7	127986344	128050733	Eef2k	5.59803	3.16859	-0.821081
chr6	88207327	88396533	Eefsec	3.9489	13.2159	1.74275	chr6	88207327	88396533	Eefsec	6.09013	4.11765	-0.564651
chr18	35020860	35024610	Egr1	78.3763	48.3637	-0.696492	chr18	35020860	35024610	Egr1	62.744	50.1222	-0.324027
chr2	118214352	118300970	Eif2ak4	6.2891	4.16953	-0.592969	chr2	118214352	118300970	Eif2ak4	12.9047	5.72921	-1.17149
chrX	91434047	91457990	Eif2s3x	6.14853	26.1049	2.08601	chrX	91434047	91457990	Eif2s3x	3.17757	40.9099	3.68646
chr7	133690424	133709880	Eif3c	64.1759	156.67	1.28763	chr7	133690424	133709880	Eif3c	40.935	47.4835	0.21409
chr1	38054854	38186511	Eif5b	50.0103	74.0446	0.566169	chr1	38054854	38186511	Eif5b	68.6061	166.554	1.27958
chr11	64792536	64976463	Elac2	14.6842	17.6667	0.266766	chr11	64792536	64976463	Elac2	31.2542	14.0807	-1.15034
chr14	79859743	79982298	Elf1	4.01994	2.99126	-0.426423	chr14	79859743	79982298	Elf1	1.84388	4.23371	1.19918
chr3	51056641	51144566	Elf2	12.7235	11.3675	-0.162573	chr3	51056641	51144566	Elf2	10.7415	11.6165	0.112983
chr9	77765171	77832326	Elovl5	13.4486	40.9131	1.6051	chr9	77765171	77832326	Elovl5	9.807	15.4869	0.659166
chr14	66149282	66211949	Elp3	28.8809	34.84	0.270629	chr14	66149282	66211949	Elp3	17.28	13.6764	-0.337419
chr16	10281841	10314061	Emp2	66.783	55.9313	-0.255827	chr16	10281841	10314061	Emp2	109.263	139.689	0.354418
chr7	105739115	105805079	Emsy	7.54967	7.2415	-0.0601247	chr7	105739115	105805079	Emsy	9.81575	7.13036	-0.461124
chr11	119352660	119372779	Endov	13.3637	4.44317	-1.58866	chr11	119352660	119372779	Endov	10.3479	4.20049	-1.30071
chr15	54670455	54751701	Enpp2	1.43196	0.150896	-3.24636	chr15	54670455	54751701	Enpp2	1.1445	0.960911	-0.252248
chr4	131479340	131631228	Epb41	7.37917	7.09542	-0.0565702	chr4	131479340	131631228	Epb41	3.02285	3.5411	0.228291
chr10	25079603	25243324	Epb41l2	30.8912	37.1146	0.264793	chr10	25079603	25243324	Epb41l2	49.2501	44.4074	-0.149327
chr11	61329384	61393189	Epn2	15.4597	7.41896	-1.05922	chr11	61329384	61393189	Epn2	26.8303	16.1133	-0.735615
chr13	104608865	104710666	Erbin	14.632	17.3055	0.242108	chr13	104608865	104710666	Erbin	12.5629	8.94234	-0.49045
chr6	147995937	148392874	Ergic2	21.6487	17.3276	-0.321207	chr6	147995937	148392874	Ergic2	23.0599	24.2735	0.073994
chr11	106258933	106349110	Ern1	4.59442	0.875333	-2.39198	chr11	106258933	106349110	Ern1	5.42594	0.833591	-2.70246
chr18	35062438	35091657	Etf1	41.4677	92.9309	1.16417	chr18	35062438	35091657	Etf1	28.4748	41.3256	0.537349
chr11	4969689	4999099	Ewsr1	309.307	206.536	-0.582641	chr11	4969689	4999099	Ewsr1	294.477	201.271	-0.549013
chr6	33199127	33923978	Exoc4	9.81612	23.2644	1.2449	chr6	33199127	33923978	Exoc4	18.437	14.7956	-0.317441
chr11	113106168	113545465	Fam104a	17.3798	43.9044	1.33696	chr11	113106168	113545465	Fam104a	11.4416	27.0736	1.24259
chr2	32731653	32816775	Fam129b	86.2198	100.444	0.220298	chr2	32731653	32816775	Fam129b	67.3926	48.8088	-0.465449
chr18	34569076	34666477	Fam13b	19.0331	3.49075	-2.4469	chr18	34569076	34666477	Fam13b	21.9105	10.3391	-1.08352
chr13	77847950	78305501	Fam172a	7.48369	6.95898	-0.104873	chr13	77847950	78305501	Fam172a	1.60743	4.96127	1.62595
chr5	20930720	20987942	Fam185a	6.22946	5.16731	-0.269691	chr5	20930720	20987942	Fam185a	7.07873	2.90024	-1.28732
chr5	122804336	122822351	Fam216a	11.7061	48.8895	2.06227	chr5	122804336	122822351	Fam216a	14.1659	20.5328	0.535514
chr4	41464469	41516560	Fam219a	13.671	2.74	-2.31887	chr4	41464469	41516560	Fam219a	7.98128	2.22939	-1.83997
chr4	41464469	41516560	Fam219aos	4.14673	3.50736	-0.241585	chr4	41464469	41516560	Fam219aos	1.76042	0.432386	-2.02553
chr15	63760648	63892010	Fam49b	19.3737	20.3415	0.0703316	chr15	63760648	63892010	Fam49b	9.7617	9.65782	-0.0154339
chr6	147995937	148392874	Far2	6.11062	0.293746	-4.37868	chr6	147995937	148392874	Far2	5.28231	2.45206	-1.10717
chr15	85036378	85116724	Fbln1	13.7008	20.7779	0.600792	chr15	85036378	85116724	Fbln1	2.07787	3.27561	0.656659
chr5	110790770	110877522	Fbrsl1	18.773	14.448	-0.37779	chr5	110790770	110877522	Fbrsl1	31.7164	14.7655	-1.103
chr11	97943867	98010930	Fbxl20	5.62448	3.18342	-0.821143	chr11	97943867	98010930	Fbxl20	8.40686	5.62979	-0.578485
chr10	85484673	85961641	Fbxo7	8.11582	6.5697	-0.30491	chr10	85484673	85961641	Fbxo7	11.6859	7.46737	-0.64609
chr5	118514989	118605467	Fbxw8	17.8946	36.6949	1.03606	chr5	118514989	118605467	Fbxw8	11.5188	19.2393	0.740067
chrX	147481712	147531086	Fgd1	4.73447	5.3528	0.177093	chrX	147481712	147531086	Fgd1	2.29244	0.721909	-1.66699
chr2	125684844	125977740	Fgf7	2.87421	0.463388	-2.63287	chr2	125684844	125977740	Fgf7	1.95715	4.29812	1.13495
chr16	57302112	57606980	Filip1l	11.5912	9.80094	-0.242043	chr16	57302112	57606980	Filip1l	11.385	11.7781	0.0489775
chr17	28535697	28623094	Fkbp5	7.44422	16.1284	1.11541	chr17	28535697	28623094	Fkbp5	5.19157	6.80191	0.38977
chr17	23886202	23908569	Flywch1	96.2043	23.7757	-2.01661	chr17	23886202	23908569	Flywch1	24.3738	27.4945	0.17381
chr2	52716901	52993236	Fmnl2	1.42498	2.09906	0.558803	chr2	52716901	52993236	Fmnl2	3.50918	2.92794	-0.261247
chr2	30881725	30997528	Fnbp1	7.02454	3.97237	-0.822403	chr2	30881725	30997528	Fnbp1	9.46994	7.93784	-0.254609
chr3	79149292	79371601	Fnip2	4.60165	1.87222	-1.2974	chr3	79149292	79371601	Fnip2	2.86251	1.9182	-0.577532
chr19	5447697	5457563	Fosl1	45.681	104.445	1.19307	chr19	5447697	5457563	Fosl1	90.014	69.319	-0.376898
chr4	119212265	119301724	Foxj3	15.0922	13.0443	-0.210388	chr4	119212265	119301724	Foxj3	17.7477	15.2274	-0.220962
chr6	98875335	99470987	Foxp1	13.4716	16.5158	0.293932	chr6	98875335	99470987	Foxp1	11.2997	44.6509	1.9824
chr2	3938728	4535089	Frmd4a	19.0145	11.8735	-0.679354	chr2	3938728	4535089	Frmd4a	19.6042	14.1676	-0.468573
chr3	116562484	116606668	Frrs1	30.0911	7.50493	-2.00343	chr3	116562484	116606668	Frrs1	14.5391	24.6535	0.761858
chr5	73411429	73647857	Fryl	5.23824	3.41673	-0.616465	chr5	73411429	73647857	Fryl	4.19823	2.70552	-0.633876
chr9	45178267	45204242	Fxyd6	36.6961	76.2956	1.05597	chr9	45178267	45204242	Fxyd6	13.4143	16.6065	0.307977
chr10	39089604	39451813	Fyn	18.7847	16.0348	-0.228349	chr10	39089604	39451813	Fyn	14.756	14.2325	-0.0521113
chr2	125684844	125977740	Galk2	4.8268	15.4771	1.68099	chr2	125684844	125977740	Galk2	5.9865	9.42934	0.655442
chr11	57437199	57601002	Galnt10	7.65248	8.71731	0.187956	chr11	57437199	57601002	Galnt10	3.66825	4.00528	0.126808
chr8	60002621	60142227	Galnt7	4.01606	4.94529	0.300274	chr8	60002621	60142227	Galnt7	2.63126	6.54533	1.31471
chr5	116015271	116072663	Gcn1	43.2177	18.1997	-1.24771	chr5	116015271	116072663	Gcn1	64.4134	20.7811	-1.63208
chr13	97907891	97968312	Gfm2	21.0665	11.7297	-0.844783	chr13	97907891	97968312	Gfm2	21.686	13.7972	-0.65238
chr1	89223572	89347385	Gigyf2	19.2487	10.8983	-0.820659	chr1	89223572	89347385	Gigyf2	22.8249	18.2588	-0.322011
chr9	114310195	114383497	Glb1	6.23928	17.0166	1.44749	chr9	114310195	114383497	Glb1	6.02301	6.0867	0.0151754
chr10	39089604	39451813	Gm16364	1.01758	2.36792	1.21848	chr10	39089604	39451813	Gm16364	2.07584	10.6904	2.36455
chr9	59236360	59334181	Gm20199	1.74526	0.0434935	-5.3265	chr9	59236360	59334181	Gm20199	1.79902	0.33158	-2.43979
chr8	108148235	108206822	Gm5914	15.6043	4.61184	-1.75853	chr8	108148235	108206822	Gm5914	2.72014	27.7276	3.34957
chr17	30352468	30713232	Gm6402	7.47338	1.05767	-2.82087	chr17	30352468	30713232	Gm6402	13.571	18.1116	0.416388
chr3	83964360	84108697	Gm6525	0.432994	2.3314	2.42878	chr3	83964360	84108697	Gm6525	7.35576	0.637933	-3.5274
chr5	149931140	149993612	Gm8615	2.85818	0.1392	-4.35986	chr5	149931140	149993612	Gm8615	1.37021	2.68972	0.973058
chr1	75432510	75439754	Gmppa	28.2073	25.5957	-0.140168	chr1	75432510	75439754	Gmppa	36.8188	14.4277	-1.3516
chr5	101275247	101328121	Gpat3	6.20926	1.17347	-2.40364	chr5	101275247	101328121	Gpat3	1.73537	2.72521	0.651119
chr11	102337229	102417472	Gpatch8	22.5433	7.18218	-1.65021	chr11	102337229	102417472	Gpatch8	14.5898	9.39134	-0.635553
chr7	125985731	126138725	Gprc5b	2.1662	4.51249	1.05876	chr7	125985731	126138725	Gprc5b	1.13236	3.80195	1.74741
chr10	118891089	119550021	Grip1	2.64424	0.631018	-2.0671	chr10	118891089	119550021	Grip1	2.7945	2.57158	-0.119939
chr5	113339497	113444558	Grk3	3.1963	0.19535	-4.03227	chr5	113339497	113444558	Grk3	2.28062	0.780992	-1.54605
chr2	44419931	44783237	Gtdc1	9.64103	3.20727	-1.58784	chr2	44419931	44783237	Gtdc1	2.86867	4.78879	0.739278
chr5	134659907	134694013	Gtf2ird2	6.54721	3.01525	-1.1186	chr5	134659907	134694013	Gtf2ird2	13.101	8.53678	-0.617919
chr7	132784467	132851202	Gtf3c1	22.3067	20.3434	-0.13292	chr7	132784467	132851202	Gtf3c1	47.5674	24.7085	-0.944969
chr13	22135066	22135527	H2bc11	12.0807	22.3365	0.886706	chr13	22135066	22135527	H2bc11	4.42241	2.65706	-0.735
chr13	23776067	23784349	H2bc4	13.2789	40.1511	1.5963	chr13	23776067	23784349	H2bc4	15.4512	32.3464	1.06589
chr13	21874783	21875266	H3c11	0.756697	7.0571	3.22129	chr13	21874783	21875266	H3c11	2.19424	2.43088	0.147756
chr13	23836910	23837390	H3c3	13.0757	50.4656	1.94841	chr13	23836910	23837390	H3c3	11.4318	6.64431	-0.782861
chr13	23653343	23654254	H3c6	0.467486	2.10966	2.17401	chr13	23653343	23654254	H3c6	2.58417	0.910195	-1.50545
chr13	23635920	23636823	H3c7	0.0676029	2.73322	5.33737	chr13	23635920	23636823	H3c7	2.93295	0.307837	-3.25211
chr13	23643154	23643537	H4c6	0.971646	14.0885	3.85795	chr13	23643154	23643537	H4c6	20.9574	1.31637	-3.99283
chr17	56219053	56249205	Hdgfl2	73.4865	40.7199	-0.851746	chr17	56219053	56249205	Hdgfl2	89.602	41.235	-1.11966
chr1	95302516	95375494	Hdlbp	52.5151	61.2453	0.221868	chr1	95302516	95375494	Hdlbp	38.531	27.1744	-0.50377
chr10	118891089	119550021	Helb	6.71861	3.68652	-0.865903	chr10	118891089	119550021	Helb	7.03226	3.35408	-1.06807
chr7	63305524	63487168	Herc2	5.96348	5.17537	-0.204493	chr7	63305524	63487168	Herc2	7.42108	4.92232	-0.592291
chr6	58781458	58870390	Herc3	3.36717	2.19473	-0.617492	chr6	58781458	58870390	Herc3	1.56812	2.22883	0.507253
chr13	97907891	97968312	Hexb	5.9503	12.7044	1.0943	chr13	97907891	97968312	Hexb	3.5054	6.27789	0.840703
chr1	194336709	194597413	Hhat	1.10852	1.69106	0.609298	chr1	194336709	194597413	Hhat	1.26674	0.237973	-2.41225
chr2	104266638	104334646	Hipk3	10.7356	12.7464	0.24769	chr2	104266638	104334646	Hipk3	6.66354	11.9683	0.844861
chr13	21924892	21925444	Hist1h2ap	18.6125	4.72689	-1.97731	chr13	21924892	21925444	Hist1h2ap	1.26173	2.78631	1.14295
chr3	19957810	20018377	Hltf	9.78326	3.89213	-1.32976	chr3	19957810	20018377	Hltf	6.90308	5.56028	-0.312083
chr14	65430436	65568694	Hmbox1	20.6616	11.5329	-0.841192	chr14	65430436	65568694	Hmbox1	19.4355	14.6231	-0.410445
chr6	117850357	117875640	Hnrnpf	65.3694	292.65	2.16249	chr6	117850357	117875640	Hnrnpf	48.7185	101.942	1.06521
chr17	80428826	80461608	Hnrnpll	28.6626	39.9492	0.478996	chr17	80428826	80461608	Hnrnpll	27.3778	25.4745	-0.103951
chr7	54015835	54051251	Hps5	14.5709	5.04125	-1.53124	chr7	54015835	54051251	Hps5	19.1606	9.66869	-0.986747
chr19	45892633	46087876	Hps6	3.06438	7.0572	1.2035	chr19	45892633	46087876	Hps6	5.428	4.51629	-0.265283
chr1	195047834	195090239	Hsd11b1	8.66361	15.5897	0.847549	chr1	195047834	195090239	Hsd11b1	9.67227	17.7083	0.872502
chr18	50287854	50355924	Hsd17b4	11.4215	24.1041	1.07752	chr18	50287854	50355924	Hsd17b4	9.95382	14.2668	0.519336
chr18	35097068	35114005	Hspa9	144.742	272.624	0.913424	chr18	35097068	35114005	Hspa9	109.36	101.162	-0.112412
chr16	22059081	22163372	Igf2bp2	5.67449	4.77959	-0.247603	chr16	22059081	22163372	Igf2bp2	2.73552	2.80691	0.0371682
chr1	72871053	72899045	Igfbp2	40.1218	28.2931	-0.503936	chr1	72871053	72899045	Igfbp2	8.66493	16.5003	0.929232
chr8	23769676	23817055	Ikbkb	27.7953	7.86585	-1.82117	chr8	23769676	23817055	Ikbkb	32.7712	14.037	-1.22319
chr18	13130431	13151459	Impact	45.4829	17.1354	-1.40835	chr18	13130431	13151459	Impact	52.9661	30.3841	-0.801754
chr1	63094374	63160841	Ino80d	7.837	2.74903	-1.51138	chr1	63094374	63160841	Ino80d	8.48721	4.49078	-0.918325
chr7	146575007	146768696	Inpp5a	9.14372	8.10966	-0.173141	chr7	146575007	146768696	Inpp5a	11.2965	9.74524	-0.213111
chr7	141862369	142365330	Insyn2a	4.12817	0.416082	-3.31056	chr7	141862369	142365330	Insyn2a	11.3425	4.57251	-1.31067
chr19	8967476	8972380	Ints5	18.0562	31.3399	0.795507	chr19	8967476	8972380	Ints5	14.7652	17.7319	0.264152
chr7	87856468	87948217	Iqgap1	37.0567	45.1167	0.283926	chr7	87856468	87948217	Iqgap1	29.551	29.025	-0.0259131
chr6	29476624	29559849	Irf5	1.83805	1.26207	-0.542389	chr6	29476624	29559849	Irf5	2.23436	1.77402	-0.33284
chr2	71624995	71696484	Itga6	4.07377	6.45774	0.664666	chr2	71624995	71696484	Itga6	2.62481	5.74819	1.1309
chr12	21117616	21292145	Itgb1bp1	6.06336	16.085	1.40752	chr12	21117616	21292145	Itgb1bp1	2.83356	8.41024	1.56953
chr4	99434096	99495849	Itgb3bp	10.5174	26.4678	1.33146	chr4	99434096	99495849	Itgb3bp	4.70049	5.47299	0.219517
chr15	102046425	102062366	Itgb7	1.81753	0.358327	-2.34263	chr15	102046425	102062366	Itgb7	1.08374	2.77968	1.35889
chr1	153191615	153211575	Ivns1abp	196.544	68.1254	-1.52859	chr1	153191615	153211575	Ivns1abp	247.376	105.658	-1.22731
chr4	100741642	100937887	Jak1	18.6727	21.0549	0.173228	chr4	100741642	100937887	Jak1	12.5099	21.373	0.772719
chr9	26904968	26963006	Jam3	29.588	36.6829	0.310098	chr9	26904968	26963006	Jam3	17.8403	12.8896	-0.468935
chr13	44826142	45017012	Jarid2	6.45624	2.36133	-1.45109	chr13	44826142	45017012	Jarid2	4.70652	1.66972	-1.49506
chr19	25311464	25508988	Kank1	1.52905	0.560809	-1.44706	chr19	25311464	25508988	Kank1	1.20696	0.677321	-0.833467
chr8	23970017	24053731	Kat6a	10.7406	8.66133	-0.310419	chr8	23970017	24053731	Kat6a	6.80642	7.09213	0.0593209
chr1	190794974	190831719	Kctd3	18.4161	12.3176	-0.580249	chr1	190794974	190831719	Kctd3	20.471	12.5873	-0.701608
chr1	108616986	108656319	Kdsr	14.9151	5.76897	-1.37039	chr1	108616986	108656319	Kdsr	9.05297	10.4182	0.202649
chr2	109120894	109181903	Kif18a	8.13627	6.35937	-0.355484	chr2	109120894	109181903	Kif18a	3.23368	7.4757	1.20903
chr4	148550427	148681842	Kif1b	18.8519	12.4715	-0.596078	chr4	148550427	148681842	Kif1b	13.2896	18.1573	0.45026
chr7	71031236	71083801	Klf13	10.2689	22.6049	1.13836	chr7	71031236	71083801	Klf13	31.3275	58.5968	0.90339
chr5	104291068	104340278	Klhl8	1.51351	2.57972	0.769317	chr5	104291068	104340278	Klhl8	5.52936	3.96271	-0.480625
chr5	24777612	25004601	Kmt2c	4.24956	1.65811	-1.35778	chr5	24777612	25004601	Kmt2c	6.10752	6.53501	0.0976041
chr7	125985731	126138725	Knop1	22.1138	28.9344	0.387843	chr7	125985731	126138725	Knop1	92.2409	57.3003	-0.686864
chr10	26701091	27336748	Lama2	6.37887	8.81774	0.467108	chr10	26701091	27336748	Lama2	13.7045	7.3901	-0.890982
chr2	179911077	179960564	Lama5	23.5001	10.5446	-1.15616	chr2	179911077	179960564	Lama5	14.9714	8.68931	-0.784899
chr9	123276044	123371793	Lars2	1199.96	810.915	-0.565367	chr9	123276044	123371793	Lars2	5116.06	2761.66	-0.889498
chr10	120360466	120416386	Lemd3	11.6837	5.08129	-1.20123	chr10	120360466	120416386	Lemd3	7.37152	7.06877	-0.0605031
chr2	109757803	109854414	Lgr4	9.86936	3.32875	-1.56798	chr2	109757803	109854414	Lgr4	4.06809	4.25515	0.0648586
chr11	82594610	82684712	Lig3	7.96145	11.202	0.492654	chr11	82594610	82684712	Lig3	7.43526	4.7188	-0.655962
chr13	55445193	55464144	Lman2	18.9859	64.5793	1.76614	chr13	55445193	55464144	Lman2	13.9656	22.0497	0.658884
chr14	102129144	102333911	Lmo7	3.55236	3.64995	0.0390967	chr14	102129144	102333911	Lmo7	3.1823	2.62464	-0.27795
chr6	134879109	134901736	Lockd	26.6586	88.6313	1.73321	chr6	134879109	134901736	Lockd	4.57131	75.2299	4.04063
chr2	112079997	112087268	Lpcat4	15.0461	11.2588	-0.418339	chr2	112079997	112087268	Lpcat4	20.4633	12.0604	-0.762754
chr3	86028611	86586616	Lrba	1.23495	2.29235	0.89237	chr3	86028611	86586616	Lrba	1.86051	1.34514	-0.467948
chr14	75154479	75347684	Lrch1	10.047	5.67355	-0.824439	chr14	75154479	75347684	Lrch1	15.4937	7.59275	-1.02899
chr10	7309597	7345275	Lrp11	3.28605	5.88675	0.841116	chr10	7309597	7345275	Lrp11	1.34386	1.95837	0.543271
chr4	107474863	107549445	Lrp8	5.14738	2.75518	-0.901691	chr4	107474863	107549445	Lrp8	2.23161	1.57955	-0.498574
chr2	96158325	97471821	Lrrc4c	1.29225	0.0392238	-5.04201	chr2	96158325	97471821	Lrrc4c	0.096316	1.84791	4.26198
chr16	37868485	37888943	Lrrc58	12.5087	16.1825	0.3715	chr16	37868485	37888943	Lrrc58	5.8184	10.0028	0.78171
chr9	111020614	111128172	Lrrfip2	35.5789	28.0751	-0.341732	chr9	111020614	111128172	Lrrfip2	40.814	27.7319	-0.557521
chr7	73403632	73533227	Lrrk1	15.8001	12.1071	-0.384073	chr7	73403632	73533227	Lrrk1	22.4275	9.95103	-1.17235
chr2	32731653	32816775	Lrsam1	8.05492	2.89518	-1.47622	chr2	32731653	32816775	Lrsam1	10.7164	6.37855	-0.748525
chr14	29718128	30535050	Lrtm1	3.84469	1.30268	-1.56139	chr14	29718128	30535050	Lrtm1	3.64909	3.77512	0.0489873
chr17	75404868	75791852	Ltbp1	48.9159	79.7284	0.704791	chr17	75404868	75791852	Ltbp1	31.0046	75.4551	1.28314
chr19	5795689	5802672	Malat1	598.003	57.6379	-3.37506	chr19	5795689	5802672	Malat1	3657.48	2009.18	-0.864244
chr3	51491534	51908928	Maml3	4.38463	2.30044	-0.930543	chr3	51491534	51908928	Maml3	2.85095	2.00068	-0.510953
chr1	66221902	66489157	Map2	4.22519	2.30612	-0.873546	chr1	66221902	66489157	Map2	2.0518	1.30203	-0.656129
chr11	110260415	110386836	Map2k6	11.4367	1.44759	-2.98195	chr11	110260415	110386836	Map2k6	1.17476	2.12093	0.852331
chr12	70847834	71087989	Map4k5	11.1505	9.12902	-0.288577	chr12	70847834	71087989	Map4k5	13.203	11.2029	-0.236988
chr3	82161993	82199190	Map9	1.79299	1.413	-0.343605	chr3	82161993	82199190	Map9	3.25439	5.10453	0.649392
chr9	75234588	75257823	Mapk6	40.9861	61.2625	0.579868	chr9	75234588	75257823	Mapk6	56.1969	65.7123	0.225674
chr13	103522568	104124572	Mast4	10.4048	6.40972	-0.69892	chr13	103522568	104124572	Mast4	12.3483	11.5544	-0.0958698
chr12	78038255	78063235	Max	23.9062	46.6554	0.96466	chr12	78038255	78063235	Max	36.5616	55.2516	0.595687
chr14	120674890	120830920	Mbnl2	49.8961	55.8566	0.162802	chr14	120674890	120830920	Mbnl2	31.9067	50.1899	0.653535
chr12	25516463	25645164	Mboat2	4.49621	8.57352	0.931178	chr12	25516463	25645164	Mboat2	1.04992	2.0852	0.989904
chr18	82644514	82755029	Mbp	2.09437	1.20012	-0.803336	chr18	82644514	82755029	Mbp	1.034	0.533611	-0.954378
chrX	153985753	154036647	Mbtps2	10.6471	8.08512	-0.397114	chrX	153985753	154036647	Mbtps2	5.38377	7.92672	0.558107
chr18	44584713	44971836	Mcc	8.97269	1.53719	-2.54525	chr18	44584713	44971836	Mcc	5.71452	9.55712	0.741944
chr13	100718486	100785594	Mccc2	12.4605	6.9803	-0.835999	chr13	100718486	100785594	Mccc2	3.96207	4.44932	0.167331
chr10	53256120	53349763	Mcm9	3.67145	1.83842	-0.997884	chr10	53256120	53349763	Mcm9	1.54978	1.533	-0.0157038
chr3	129617877	129673124	Mcub	0.99153	7.11682	2.8435	chr3	129617877	129673124	Mcub	2.66841	6.43561	1.27009
chr5	119010727	119215446	Med13l	15.8249	5.5529	-1.51088	chr5	119010727	119215446	Med13l	9.50838	9.10922	-0.0618711
chr6	30683505	30846794	Mest	49.6038	93.486	0.914299	chr6	30683505	30846794	Mest	3.27419	7.92874	1.27596
chr1	165925019	165927376	Mettl18	0.98445	6.75918	2.77946	chr1	165925019	165927376	Mettl18	1.61657	5.70888	1.82027
chr2	69699618	69723672	Mettl5	20.1556	21.8741	0.118042	chr2	69699618	69723672	Mettl5	2.13295	6.92925	1.69985
chr4	122624093	122638431	Mfsd2a	10.5894	16.0498	0.599936	chr4	122624093	122638431	Mfsd2a	7.66838	12.5565	0.711442
chr7	144086293	144319871	Mgmt	4.11266	44.4999	3.43566	chr7	144086293	144319871	Mgmt	14.047	27.3331	0.960387
chr16	4886099	4941033	Mgrn1	11.074	14.5611	0.394942	chr16	4886099	4941033	Mgrn1	16.8668	9.14637	-0.882917
chr10	59165310	59326882	Micu1	16.1134	40.217	1.31954	chr10	59165310	59326882	Micu1	18.6006	21.7594	0.226293
chr10	80128062	80139038	Mknk2	31.7859	40.1282	0.336228	chr10	80128062	80139038	Mknk2	18.4171	23.5834	0.356725
chr6	115551955	115628385	Mkrn2	7.43442	9.42193	0.341802	chr6	115551955	115628385	Mkrn2	4.59124	4.70751	0.0360797
chr2	17976863	18314457	Mllt10	23.7018	6.63474	-1.83689	chr2	17976863	18314457	Mllt10	25.527	15.0469	-0.762558
chr4	87415828	87679311	Mllt3	2.45574	2.6249	0.0961061	chr4	87415828	87679311	Mllt3	1.01571	3.34566	1.7198
chr4	154211524	154269639	Mmel1	1.54266	0.529886	-1.54167	chr4	154211524	154269639	Mmel1	3.61543	2.5879	-0.482386
chr12	74224703	74374975	Mnat1	7.975	31.4297	1.97857	chr12	74224703	74374975	Mnat1	8.80018	10.4313	0.245318
chr3	104597749	104621481	Mov10	6.79701	6.24626	-0.121908	chr3	104597749	104621481	Mov10	5.90997	3.88145	-0.606555
chr11	32126504	32167707	Mpg	7.90973	17.2693	1.12651	chr11	32126504	32167707	Mpg	11.2075	6.58102	-0.768076
chr6	50060239	50148597	Mpp6	9.58831	36.7498	1.93839	chr6	50060239	50148597	Mpp6	5.95415	9.56435	0.68377
chr18	67247951	67405484	Mppe1	10.7203	3.7134	-1.52954	chr18	67247951	67405484	Mppe1	6.65229	5.53599	-0.265009
chr1	72205806	72258888	Mreg	10.345	2.38087	-2.11938	chr1	72205806	72258888	Mreg	1.54009	3.18236	1.04708
chr1	4763278	4775807	Mrpl15	7.08041	26.0832	1.88121	chr1	4763278	4775807	Mrpl15	3.79665	6.56636	0.790366
chr5	31916323	31925017	Mrpl33	91.9304	550.875	2.58311	chr5	31916323	31925017	Mrpl33	166.784	663.034	1.99111
chr10	94943438	94964583	Mrpl42	53.1588	329.418	2.63154	chr10	94943438	94964583	Mrpl42	23.9514	103.55	2.11215
chr11	88152883	88579591	Msi2	22.5997	32.1248	0.507386	chr11	88152883	88579591	Msi2	16.9789	18.2385	0.103248
chr11	98656829	98695121	Msl1	68.8916	58.8532	-0.227206	chr11	98656829	98695121	Msl1	80.6428	84.5726	0.0686453
chr17	29469020	29484877	Mtch1	51.1995	156.456	1.61156	chr17	29469020	29484877	Mtch1	47.0094	63.9891	0.444879
chr15	34012473	34073291	Mtdh	45.4223	64.6595	0.509463	chr15	34012473	34073291	Mtdh	40.6334	88.8511	1.12872
chr10	6179459	6373466	Mthfd1l	20.9429	44.8044	1.09718	chr10	6179459	6373466	Mthfd1l	9.04112	13.4939	0.577734
chr18	4375589	4398796	Mtpap	10.0931	8.91508	-0.179045	chr18	4375589	4398796	Mtpap	8.41134	5.04943	-0.736215
chr3	137752818	137806382	Mttp	1.24067	2.36857	0.9329	chr3	137752818	137806382	Mttp	3.43459	2.00608	-0.775758
chr11	116664713	116689441	Mxra7	56.901	70.759	0.31446	chr11	116664713	116689441	Mxra7	36.7921	36.7196	-0.0028457
chr13	45485110	45507309	Mylip	12.1348	2.96131	-2.03484	chr13	45485110	45507309	Mylip	7.86642	4.78851	-0.716132
chr16	44139903	44163575	Naa50	47.6588	90.1259	0.919199	chr16	44139903	44163575	Naa50	15.1737	37.7113	1.31343
chr11	100931407	100938985	Naglu	6.49239	5.31544	-0.288559	chr11	100931407	100938985	Naglu	8.69852	4.66962	-0.897465
chr4	46052093	46185274	Ncbp1	31.9737	52.3504	0.711314	chr4	46052093	46185274	Ncbp1	34.0625	30.774	-0.146474
chr12	4247361	4484060	Ncoa1	12.8216	13.181	0.0398761	chr12	4247361	4484060	Ncoa1	11.8093	23.0254	0.963301
chr5	125497522	125659584	Ncor2	35.2773	37.2576	0.0787921	chr5	125497522	125659584	Ncor2	54.8224	28.7024	-0.933596
chr2	31101442	31150991	Ncs1	21.969	38.4675	0.808172	chr2	31101442	31150991	Ncs1	16.1638	32.0057	0.985561
chr18	65047409	65377480	Nedd4l	7.30873	3.67597	-0.991496	chr18	65047409	65377480	Nedd4l	3.04059	2.33939	-0.37822
chr13	41405284	41582729	Nedd9	2.02806	1.32692	-0.612023	chr13	41405284	41582729	Nedd9	1.55303	1.53687	-0.0150863
chr8	63471989	63610143	Nek1	4.28405	4.15644	-0.0436291	chr8	63471989	63610143	Nek1	4.95759	4.62893	-0.0989621
chr16	44724413	44737397	Nepro	14.2953	7.8063	-0.872825	chr16	44724413	44737397	Nepro	15.0364	13.2126	-0.186551
chr4	81936076	82151683	Nfib	23.8029	28.1285	0.240898	chr4	81936076	82151683	Nfib	19.2219	95.6059	2.31435
chr10	18127480	18253697	Nhsl1	2.08696	1.49589	-0.4804	chr10	18127480	18253697	Nhsl1	1.74379	1.00226	-0.798974
chr9	121628298	121669061	Nktr	50.6541	7.68541	-2.72048	chr9	121628298	121669061	Nktr	34.7481	20.4691	-0.763487
chr1	166237802	166388486	Nme7	7.081	14.3954	1.02358	chr1	166237802	166388486	Nme7	2.32419	3.50051	0.590833
chr11	102889856	102930222	Nmt1	29.0455	59.5934	1.03684	chr11	102889856	102930222	Nmt1	25.4564	49.4059	0.956658
chr13	120123123	120198064	Nnt	9.8255	15.3654	0.645082	chr13	120123123	120198064	Nnt	10.099	9.03271	-0.160983
chr7	16523184	16531457	Nop53	77.6088	158.02	1.02581	chr7	16523184	16531457	Nop53	108.579	109.423	0.0111729
chr18	12327238	12394895	Npc1	8.42418	8.51737	0.0158708	chr18	12327238	12394895	Npc1	5.13285	4.31434	-0.250618
chr11	120241111	120299014	Nploc4	24.7147	22.4719	-0.137251	chr11	120241111	120299014	Nploc4	16.8752	13.7005	-0.300678
chr11	32126504	32167707	Nprl3	22.7938	8.52891	-1.41821	chr11	32126504	32167707	Nprl3	20.6373	14.3607	-0.523133
chr9	58430046	58589366	Nptn	46.7783	124.907	1.41695	chr9	58430046	58589366	Nptn	25.3444	59.4177	1.22923
chr4	108673259	108874877	Nrd1	36.2901	29.3958	-0.303968	chr4	108673259	108874877	Nrd1	54.4423	27.4212	-0.989436
chr6	29997987	30103458	Nrf1	20.9879	17.2302	-0.284615	chr6	29997987	30103458	Nrf1	10.5956	12.2142	0.2051
chr16	76287647	76374072	Nrip1	3.71549	3.1349	-0.245133	chr16	76287647	76374072	Nrip1	4.26111	4.07353	-0.0649513
chr17	90432983	91492142	Nrxn1	5.50336	0.0100428	-9.09801	chr17	90432983	91492142	Nrxn1	0.0986891	1.08967	3.46486
chr7	137676039	137690895	Nsmce4a	19.2874	58.6427	1.60429	chr7	137676039	137690895	Nsmce4a	9.27804	23.7684	1.35715
chr19	46961320	47099817	Nt5c2	20.6712	17.6085	-0.231353	chr19	46961320	47099817	Nt5c2	14.6974	11.1237	-0.401916
chr14	31944274	31981827	Nt5dc2	30.531	105.343	1.78674	chr14	31944274	31981827	Nt5dc2	15.4751	34.7421	1.16673
chr12	53198732	53411946	Nubpl	8.51024	13.9199	0.709879	chr12	53198732	53411946	Nubpl	1.72094	6.41967	1.8993
chr16	4886099	4941033	Nudt16l1	19.315	32.1566	0.735393	chr16	4886099	4941033	Nudt16l1	12.9773	14.8831	0.197687
chr11	77499640	77531468	Nufip2	23.8562	11.2637	-1.08268	chr11	77499640	77531468	Nufip2	23.2902	21.2979	-0.129011
chr2	30141935	30199786	Nup188	17.8575	25.3345	0.50457	chr2	30141935	30199786	Nup188	17.3782	16.4693	-0.0775044
chr7	19813737	19832166	Opa3	13.2232	10.5524	-0.325494	chr7	19813737	19832166	Opa3	8.57484	17.4228	1.02279
chr2	4941687	4985163	Optn	13.914	6.79084	-1.03487	chr2	4941687	4985163	Optn	9.35775	9.2576	-0.0155228
chr5	123465082	123480461	Orai1	4.10193	13.0506	1.66974	chr5	123465082	123480461	Orai1	4.23541	4.01252	-0.0779934
chr6	50243325	50406353	Osbpl3	8.34279	3.96173	-1.0744	chr6	50243325	50406353	Osbpl3	4.45589	4.271	-0.0611425
chr4	108673259	108874877	Osbpl9	24.1191	32.5162	0.430984	chr4	108673259	108874877	Osbpl9	20.5216	32.2602	0.652617
chr15	41279027	41692593	Oxr1	22.1957	18.2071	-0.285783	chr15	41279027	41692593	Oxr1	8.67055	11.278	0.379318
chr9	119147550	119231545	Oxsr1	13.8755	12.1521	-0.191328	chr9	119147550	119231545	Oxsr1	11.5537	10.0259	-0.204612
chr4	122960153	122976168	Pabpc4	65.9949	182.92	1.47079	chr4	122960153	122976168	Pabpc4	75.9684	188.84	1.31369
chr13	120217406	120249130	Paip1	16.9329	20.7224	0.291363	chr13	120217406	120249130	Paip1	13.265	19.6414	0.566268
chr7	104937050	105060891	Pak1	71.7144	111.914	0.642052	chr7	104937050	105060891	Pak1	106.832	70.1242	-0.60736
chr7	129250775	129276460	Palb2	14.0325	4.89682	-1.51885	chr7	129250775	129276460	Palb2	10.8341	4.70722	-1.20263
chr8	129587955	130136186	Pard3	15.3314	15.1044	-0.0215145	chr8	129587955	130136186	Pard3	11.7791	21.1781	0.846347
chr7	119571219	119735202	Parva	16.6132	33.397	1.00739	chr7	119571219	119735202	Parva	12.5689	14.1527	0.171226
chr14	122883586	123289166	Pcca	1.51826	8.20779	2.43457	chr14	122883586	123289166	Pcca	2.43314	1.64422	-0.565413
chr7	99792221	99818422	Pcf11	15.334	6.37221	-1.26687	chr7	99792221	99818422	Pcf11	31.2936	23.7826	-0.395958
chr1	7079000	7163709	Pcmtd1	8.13269	4.43499	-0.874803	chr1	7079000	7163709	Pcmtd1	9.60063	13.1058	0.449006
chr19	53966720	54107768	Pdcd4	11.3526	13.2024	0.217782	chr19	53966720	54107768	Pdcd4	12.415	9.11509	-0.445751
chr4	101927346	102279880	Pde4b	18.4568	12.4468	-0.568376	chr4	101927346	102279880	Pde4b	17.1585	19.6035	0.192183
chr13	109444370	110746177	Pde4d	11.2443	5.56897	-1.01371	chr13	109444370	110746177	Pde4d	5.01311	4.76927	-0.071938
chr2	71711280	71741915	Pdk1	2.41671	1.85601	-0.380841	chr2	71711280	71741915	Pdk1	1.37029	0.870822	-0.65403
chr1	72290566	72330895	Pecr	4.20686	14.019	1.73656	chr1	72290566	72330895	Pecr	4.87834	7.76892	0.671325
chr8	3457105	3467648	Pex11g	11.0242	1.91643	-2.52418	chr8	3457105	3467648	Pex11g	4.15199	4.69728	0.178022
chr10	19579895	19627480	Pex7	3.24776	8.21653	1.33908	chr10	19579895	19627480	Pex7	3.92461	4.5427	0.211002
chr2	11393057	11475556	Pfkfb3	2.40791	1.64749	-0.547507	chr2	11393057	11475556	Pfkfb3	1.73507	1.02454	-0.760013
chr11	117848170	117990533	Pgs1	52.9746	38.4181	-0.463513	chr11	117848170	117990533	Pgs1	63.6406	37.4586	-0.76465
chr16	45746343	45844864	Phldb2	21.2031	10.0203	-1.08135	chr16	45746343	45844864	Phldb2	21.8046	12.8972	-0.757572
chr14	99475852	99653713	Pibf1	3.79037	3.37593	-0.167055	chr14	99475852	99653713	Pibf1	1.84838	1.55582	-0.248585
chr16	94580369	94690828	Pigp	31.4591	80.2742	1.35146	chr16	94580369	94690828	Pigp	34.9527	83.7689	1.26101
chr2	58998906	59193262	Pkp4	15.9812	21.0344	0.396377	chr2	58998906	59193262	Pkp4	15.9938	34.0942	1.09202
chr6	140372619	140543427	Plekha5	6.05025	1.41849	-2.09264	chr6	140372619	140543427	Plekha5	6.04267	1.43621	-2.07291
chr1	64835694	65003398	Plekhm3	2.77705	1.50356	-0.885173	chr1	64835694	65003398	Plekhm3	2.84457	2.32444	-0.291328
chr5	137458063	137472516	Plod3	22.2357	39.635	0.833897	chr5	137458063	137472516	Plod3	34.7708	26.3879	-0.398001
chr2	16277930	16677466	Plxdc2	4.18596	6.75082	0.689506	chr2	16277930	16677466	Plxdc2	7.73036	8.34527	0.110423
chr2	24831552	24909592	Pnpla7	5.78964	2.5112	-1.2051	chr2	24831552	24909592	Pnpla7	7.76504	2.70109	-1.52345
chr6	31469492	31513937	Podxl	2.40168	1.80203	-0.414421	chr6	31469492	31513937	Podxl	1.22334	1.49483	0.289163
chr2	128926731	128952331	Polr1b	22.1842	13.6362	-0.70209	chr2	128926731	128952331	Polr1b	33.5403	21.6895	-0.628898
chr5	148672203	148687360	Pomp	75.0055	302.658	2.01262	chr5	148672203	148687360	Pomp	29.5064	86.2456	1.54742
chr13	77847950	78305501	Pou5f2	5.2387	0.188017	-4.80028	chr13	77847950	78305501	Pou5f2	7.72895	4.42129	-0.805805
chr15	93228780	93322343	Pphln1	12.3801	18.1807	0.554385	chr15	93228780	93322343	Pphln1	8.385	11.2495	0.423981
chr10	7512691	7542361	Ppil4	21.8812	14.0474	-0.639388	chr10	7512691	7542361	Ppil4	22.6082	15.2053	-0.572268
chr6	4852974	5115661	Ppp1r9a	4.05152	0.392376	-3.36815	chr6	4852974	5115661	Ppp1r9a	1.48276	0.690916	-1.10171
chr12	56381800	56483478	Ppp2r3c	13.7999	11.914	-0.212009	chr12	56381800	56483478	Ppp2r3c	13.1876	11.3153	-0.220909
chr11	17059300	17100383	Ppp3r1	23.4025	45.871	0.970918	chr11	17059300	17100383	Ppp3r1	11.762	15.3641	0.385435
chr19	3454927	3575749	Ppp6r3	29.4786	26.6788	-0.143972	chr19	3454927	3575749	Ppp6r3	24.6873	14.9522	-0.723412
chr8	47637422	47702581	Primpol	4.74803	2.07217	-1.19618	chr8	47637422	47702581	Primpol	6.41501	3.86563	-0.730746
chr7	129432638	129777915	Prkcb	4.10046	1.23011	-1.737	chr7	129432638	129777915	Prkcb	2.32886	4.43356	0.928843
chr12	56381800	56483478	Prorp	6.04648	6.00763	-0.00930008	chr12	56381800	56483478	Prorp	3.07366	4.62905	0.590757
chr4	108237471	108251941	Prpf38a	16.1704	52.4361	1.6972	chr4	108237471	108251941	Prpf38a	19.3181	18.7002	-0.0469029
chr15	84493635	84536832	Prr5	13.0877	18.3936	0.49099	chr15	84493635	84536832	Prr5	11.2678	5.77515	-0.964277
chr3	95057595	95085998	Prune1	11.3554	10.3899	-0.128189	chr3	95057595	95085998	Prune1	6.78479	5.66214	-0.260956
chr8	70212980	70498473	Psd3	3.19262	1.67474	-0.930801	chr8	70212980	70498473	Psd3	1.77167	1.55871	-0.184758
chr2	36085945	36107791	Ptgs1	42.3837	8.60038	-2.30104	chr2	36085945	36107791	Ptgs1	20.149	25.9828	0.366852
chr2	30271569	30303327	Ptpa	113.115	131.498	0.217247	chr2	30271569	30303327	Ptpa	110.484	102.252	-0.111714
chr2	90750869	90758207	Ptpmt1	11.8751	39.6906	1.74086	chr2	90750869	90758207	Ptpmt1	8.37492	20.2024	1.27038
chr1	191552146	191700572	Ptpn14	10.5361	9.89993	-0.0898523	chr1	191552146	191700572	Ptpn14	21.3625	11.6816	-0.870841
chr18	67825154	67884275	Ptpn2	20.2967	34.4411	0.76289	chr18	67825154	67884275	Ptpn2	13.7287	20.3892	0.570614
chr12	99914950	99975615	Ptpn21	14.7705	12.396	-0.252841	chr12	99914950	99975615	Ptpn21	15.6951	16.2554	0.0506114
chr4	57203712	57314709	Ptpn3	3.30489	1.60707	-1.04017	chr4	57203712	57314709	Ptpn3	4.25936	1.91159	-1.15586
chr4	75587140	77857646	Ptprd	5.08905	6.12563	0.267462	chr4	75587140	77857646	Ptprd	6.39573	16.2841	1.34829
chr14	12386066	13074555	Ptprg	6.44423	6.25111	-0.0438961	chr14	12386066	13074555	Ptprg	3.60749	6.32381	0.809799
chr2	90269912	90420804	Ptprj	5.48812	1.85226	-1.56703	chr2	90269912	90420804	Ptprj	2.49789	1.80798	-0.466337
chr17	33879428	33897431	Rab11b	17.516	28.8315	0.71897	chr17	33879428	33897431	Rab11b	15.568	26.7153	0.779086
chr17	26125980	26206463	Rab11fip3	24.159	9.91606	-1.28472	chr17	26125980	26206463	Rab11fip3	27.3152	19.0876	-0.517063
chr2	37298804	37421957	Rabgap1	18.2238	12.9306	-0.495033	chr2	37298804	37421957	Rabgap1	13.1348	13.0169	-0.0130075
chr12	80398268	80915677	Rad51b	0.725384	1.29257	0.833425	chr12	80398268	80915677	Rad51b	0.840117	2.18566	1.37941
chr6	115551955	115628385	Raf1	52.3149	33.002	-0.664665	chr6	115551955	115628385	Raf1	53.058	33.4396	-0.666014
chr2	28368686	28408602	Ralgds	8.33778	12.2798	0.558557	chr2	28368686	28408602	Ralgds	8.7243	7.95776	-0.132678
chr16	5884885	7412573	Rbfox1	6.41893	0.852605	-2.91238	chr16	5884885	7412573	Rbfox1	2.38214	3.5297	0.567291
chr15	76909419	77137483	Rbfox2	91.6562	34.1957	-1.42242	chr15	76909419	77137483	Rbfox2	47.6898	41.8711	-0.187727
chr11	118351073	118772911	Rbfox3	9.74773	0.0823426	-6.88728	chr11	118351073	118772911	Rbfox3	0.136286	2.01858	3.88863
chr2	155897576	155937701	Rbm12	17.596	13.1403	-0.421247	chr2	155897576	155937701	Rbm12	10.372	9.02724	-0.200339
chr4	12067263	12073892	Rbm12b1	7.0385	3.29471	-1.09512	chr4	12067263	12073892	Rbm12b1	6.64241	6.07704	-0.128339
chr4	12016516	12023418	Rbm12b2	11.3846	4.21165	-1.43463	chr4	12016516	12023418	Rbm12b2	6.62942	5.38374	-0.300274
chr9	106786315	106789331	Rbm15b	12.7873	25.4223	0.991386	chr9	106786315	106789331	Rbm15b	7.42862	10.4951	0.498549
chr5	53947017	54048684	Rbpj	18.9958	19.5767	0.0434572	chr5	53947017	54048684	Rbpj	19.7611	17.2466	-0.196348
chr16	92392195	92466414	Rcan1	7.43281	10.2362	0.461706	chr16	92392195	92466414	Rcan1	7.53053	4.50201	-0.742183
chr17	43938300	44176465	Rcan2	2.94948	3.41143	0.209914	chr17	43938300	44176465	Rcan2	0.415478	2.86032	2.78333
[truncated: 206 more rows]

## Sheet: SC  YTHDC1 export targets 
Supplementary Table S4. Analysis of YTHDC1 mRNA nuclear export in ASC and C2C12 myoblasts
[truncated: 57 more rows]

[truncated: 8 more sheets: SC YTHDC1-m6a targets, C2C12 targets, C2C12 YTHDC1 targets, C2 YTHDC1 export targets, C2 YTHDC1 expo splicing targets, C2C12 m6A-YTHDC1 targets, C2C12 m6a-YTHDC1 export , C2 m6a-YTHDC1 expo spli targets]
