# Supplementary material for: Nuclear m6A Reader YTHDC1 Promotes Muscle Stem Cell Activation/Proliferation by Regulating mRNA Splicing and Nuclear Export
Source: bioRxiv preprint, doi:10.1101/2022.08.07.503064, version 1 (2022-08-07)
Supplement: suppl table S5 [file 503064_file10.xlsx]

## Sheet: IP-Mass-pRK-empty-vector
Suppl. Table S5. Co-IP/MS identifies YTHDC1 Interacting Proteins in C2C12 Myoblasts
Proteins identified in pRK-empty-vector
Protein Group	Protein ID	Accession	-10lgP	Coverage (%)	Coverage (%) RK	Area RK	#Peptides	#Unique	#Spec RK	PTM	Avg. Mass	Description
1	1	Q8VDD5|MYH9_MOUSE	526.34	36	36	11184000	73	61	1443	Carbamidomethylation; Oxidation (M); Acetylation (Protein N-term); Deamidation (NQ)	226370	Myosin-9 OS=Mus musculus OX=10090 GN=Myh9 PE=1 SV=4
5	4	Q9QXS1|PLEC_MOUSE	487.12	20	20	823440	85	85	325	Carbamidomethylation; Oxidation (M); Deamidation (NQ)	534193	Plectin OS=Mus musculus OX=10090 GN=Plec PE=1 SV=3
4	3	Q61879|MYH10_MOUSE	449.45	25	25	985160	44	37	346	Carbamidomethylation; Oxidation (M); Acetylation (Protein N-term); Deamidation (NQ)	228994	Myosin-10 OS=Mus musculus OX=10090 GN=Myh10 PE=1 SV=2
10	12	Q7TPV4|MBB1A_MOUSE	374.35	17	17	1316000	19	19	218	Carbamidomethylation; Oxidation (M); Deamidation (NQ)	152036	Myb-binding protein 1A OS=Mus musculus OX=10090 GN=Mybbp1a PE=1 SV=2
9	14	P20152|VIME_MOUSE	363.28	39	39	2671000	19	17	249	Carbamidomethylation; Oxidation (M); Deamidation (NQ)	53688	Vimentin OS=Mus musculus OX=10090 GN=Vim PE=1 SV=3
28	6	Q8BTM8|FLNA_MOUSE	360.95	15	15	100020	27	26	88	Carbamidomethylation; Oxidation (M); Deamidation (NQ)	281219	Filamin-A OS=Mus musculus OX=10090 GN=Flna PE=1 SV=5
15	5	E9PVX6|KI67_MOUSE	357.86	16	16	137310	37	37	138	Carbamidomethylation; Oxidation (M); Acetylation (Protein N-term); Deamidation (NQ)	350864	Proliferation marker protein Ki-67 OS=Mus musculus OX=10090 GN=Mki67 PE=1 SV=1
34	10	Q99104|MYO5A_MOUSE	354.44	13	13	246590	21	21	70	Carbamidomethylation; Oxidation (M); Deamidation (NQ)	215536	Unconventional myosin-Va OS=Mus musculus OX=10090 GN=Myo5a PE=1 SV=2
19	2	Q9JIK5|DDX21_MOUSE	339.53	32	32	342860	23	23	116	Carbamidomethylation; Oxidation (M); Deamidation (NQ)	93551	Nucleolar RNA helicase 2 OS=Mus musculus OX=10090 GN=Ddx21 PE=1 SV=3
31	9	E9Q7G0|NUMA1_MOUSE	339.23	16	16	71355	29	29	75	Carbamidomethylation; Oxidation (M); Deamidation (NQ)	235628	Nuclear mitotic apparatus protein 1 OS=Mus musculus OX=10090 GN=Numa1 PE=1 SV=1
11	20	Q9D0E1|HNRPM_MOUSE	336.84	26	26	991440	15	15	197	Carbamidomethylation; Oxidation (M); Acetylation (Protein N-term); Deamidation (NQ)	77649	Heterogeneous nuclear ribonucleoprotein M OS=Mus musculus OX=10090 GN=Hnrnpm PE=1 SV=3
2	60	P60710|ACTB_MOUSE	332.37	31	31	1722300	10	1	419	Carbamidomethylation; Oxidation (M); Acetylation (Protein N-term); Deamidation (NQ)	41737	Actin cytoplasmic 1 OS=Mus musculus OX=10090 GN=Actb PE=1 SV=1
3	61	P63260|ACTG_MOUSE	331.31	31	31	257110	10	1	366	Carbamidomethylation; Oxidation (M); Acetylation (Protein N-term); Deamidation (NQ)	41793	Actin cytoplasmic 2 OS=Mus musculus OX=10090 GN=Actg1 PE=1 SV=1
23	8	Q99PL5|RRBP1_MOUSE	328.98	19	19	262840	28	28	109	Carbamidomethylation; Oxidation (M); Deamidation (NQ)	172878	Ribosome-binding protein 1 OS=Mus musculus OX=10090 GN=Rrbp1 PE=1 SV=2
22	16	Q3U0V1|FUBP2_MOUSE	323.81	34	34	221060	18	17	112	Carbamidomethylation; Oxidation (M); Acetylation (Protein N-term); Deamidation (NQ)	76776	Far upstream element-binding protein 2 OS=Mus musculus OX=10090 GN=Khsrp PE=1 SV=2
26	23	Q8C2Q3|RBM14_MOUSE	323.65	26	26	464860	13	13	100	Carbamidomethylation; Oxidation (M); Deamidation (NQ)	69449	RNA-binding protein 14 OS=Mus musculus OX=10090 GN=Rbm14 PE=1 SV=1
7	71	P63268|ACTH_MOUSE	310.41	31	31	107.58	10	1	279	Carbamidomethylation; Oxidation (M); Deamidation (NQ)	41877	Actin gamma-enteric smooth muscle OS=Mus musculus OX=10090 GN=Actg2 PE=1 SV=1
8	72	P68033|ACTC_MOUSE	310.34	30	30	197650	10	1	279	Oxidation (M); Deamidation (NQ)	42019	Actin alpha cardiac muscle 1 OS=Mus musculus OX=10090 GN=Actc1 PE=1 SV=1
8	73	P62737|ACTA_MOUSE	310.34	30	30	197650	10	1	279	Oxidation (M); Deamidation (NQ)	42009	Actin aortic smooth muscle OS=Mus musculus OX=10090 GN=Acta2 PE=1 SV=1
25	18	P58774|TPM2_MOUSE	305.06	54	54	128260	17	11	105	Carbamidomethylation; Oxidation (M); Deamidation (NQ)	32837	Tropomyosin beta chain OS=Mus musculus OX=10090 GN=Tpm2 PE=1 SV=1
42	7	P97434|MPRIP_MOUSE	301.96	28	28	57339	20	20	59	Carbamidomethylation; Oxidation (M); Deamidation (NQ)	116408	Myosin phosphatase Rho-interacting protein OS=Mus musculus OX=10090 GN=Mprip PE=1 SV=2
33	17	P31001|DESM_MOUSE	300.15	34	34	251150	15	13	72	Oxidation (M); Acetylation (Protein N-term); Deamidation (NQ)	53498	Desmin OS=Mus musculus OX=10090 GN=Des PE=1 SV=3
50	13	Q9EP71|RAI14_MOUSE	298.93	22	22	53930	19	19	53	Carbamidomethylation; Oxidation (M); Deamidation (NQ)	108852	Ankycorbin OS=Mus musculus OX=10090 GN=Rai14 PE=1 SV=1
138	80	Q04750|TOP1_MOUSE	297.72	13	13	88713	8	8	26	Carbamidomethylation; Oxidation (M); Deamidation (NQ)	90876	DNA topoisomerase 1 OS=Mus musculus OX=10090 GN=Top1 PE=1 SV=2
32	22	Q2KN98|CYTSA_MOUSE	296.72	15	15	71771	13	13	72	Carbamidomethylation; Oxidation (M); Deamidation (NQ)	124488	Cytospin-A OS=Mus musculus OX=10090 GN=Specc1l PE=1 SV=1
58	11	Q80X90|FLNB_MOUSE	294.18	10	10	13536	19	16	49	Carbamidomethylation; Oxidation (M)	277822	Filamin-B OS=Mus musculus OX=10090 GN=Flnb PE=1 SV=3
64	29	Q80WJ7|LYRIC_MOUSE	283.74	25	25	78684	13	13	47	Oxidation (M); Deamidation (NQ)	63846	Protein LYRIC OS=Mus musculus OX=10090 GN=Mtdh PE=1 SV=1
35	70	Q5F2E7|NUFP2_MOUSE	282.68	16	16	110000	10	10	70	Carbamidomethylation; Oxidation (M); Deamidation (NQ)	75657	Nuclear fragile X mental retardation-interacting protein 2 OS=Mus musculus OX=10090 GN=Nufip2 PE=1 SV=1
63	38	Q80YR5|SAFB2_MOUSE	278.98	15	15	36458	10	8	47	Carbamidomethylation; Oxidation (M); Acetylation (Protein N-term); Deamidation (NQ)	111839	Scaffold attachment factor B2 OS=Mus musculus OX=10090 GN=Safb2 PE=1 SV=2
82	91	Q9D6Z1|NOP56_MOUSE	277.01	20	20	107070	9	9	38	Carbamidomethylation; Oxidation (M); Deamidation (NQ)	64464	Nucleolar protein 56 OS=Mus musculus OX=10090 GN=Nop56 PE=1 SV=2
12	200	P15864|H12_MOUSE	276.99	33	33	900850	9	4	179	Acetylation (Protein N-term); Deamidation (NQ)	21267	Histone H1.2 OS=Mus musculus OX=10090 GN=H1-2 PE=1 SV=2
56	35	Q91VX2|UBAP2_MOUSE	273.19	15	15	89077	11	11	50	Oxidation (M); Deamidation (NQ)	117966	Ubiquitin-associated protein 2 OS=Mus musculus OX=10090 GN=Ubap2 PE=1 SV=1
76	15	Q8K4L3|SVIL_MOUSE	272.14	9	9	31183	15	15	40	Carbamidomethylation; Deamidation (NQ)	243159	Supervillin OS=Mus musculus OX=10090 GN=Svil PE=1 SV=1
40	95	Q9WTI7|MYO1C_MOUSE	271.08	10	10	279700	9	9	65	Carbamidomethylation; Oxidation (M); Deamidation (NQ)	121944	Unconventional myosin-Ic OS=Mus musculus OX=10090 GN=Myo1c PE=1 SV=2
20	276	P43274|H14_MOUSE	269.94	27	27	882710	8	5	115	Acetylation (Protein N-term); Deamidation (NQ)	21977	Histone H1.4 OS=Mus musculus OX=10090 GN=H1-4 PE=1 SV=2
24	75	O88569|ROA2_MOUSE	269.6	34	34	526720	9	9	109	Carbamidomethylation; Oxidation (M); Deamidation (NQ)	37403	Heterogeneous nuclear ribonucleoproteins A2/B1 OS=Mus musculus OX=10090 GN=Hnrnpa2b1 PE=1 SV=2
83	19	P39447|ZO1_MOUSE	269.4	11	11	21869	15	15	37	Deamidation (NQ)	194740	Tight junction protein ZO-1 OS=Mus musculus OX=10090 GN=Tjp1 PE=1 SV=2
99	43	Q61656|DDX5_MOUSE	268.54	16	16	101640	9	5	33	Carbamidomethylation; Oxidation (M); Acetylation (Protein N-term); Deamidation (NQ)	69290	Probable ATP-dependent RNA helicase DDX5 OS=Mus musculus OX=10090 GN=Ddx5 PE=1 SV=2
16	275	P43277|H13_MOUSE	266.97	27	27	903600	8	3	137	Acetylation (Protein N-term); Deamidation (NQ)	22100	Histone H1.3 OS=Mus musculus OX=10090 GN=H1-3 PE=1 SV=2
106	37	Q8BMK4|CKAP4_MOUSE	266.3	25	25	45918	11	11	32	Carbamidomethylation; Oxidation (M)	63692	Cytoskeleton-associated protein 4 OS=Mus musculus OX=10090 GN=Ckap4 PE=1 SV=2
269	33	Q8BTI8|SRRM2_MOUSE	262.44	5	5	29354	9	9	13	Deamidation (NQ)	294841	Serine/arginine repetitive matrix protein 2 OS=Mus musculus OX=10090 GN=Srrm2 PE=1 SV=3
52	40	P63017|HSP7C_MOUSE	261.02	24	24	56549	10	8	52	Oxidation (M); Deamidation (NQ)	70871	Heat shock cognate 71 kDa protein OS=Mus musculus OX=10090 GN=Hspa8 PE=1 SV=1
14	133	Q60605|MYL6_MOUSE	261	48	48	1193400	7	6	156	Carbamidomethylation; Oxidation (M); Acetylation (Protein N-term); Deamidation (NQ)	16930	Myosin light polypeptide 6 OS=Mus musculus OX=10090 GN=Myl6 PE=1 SV=3
44	26	Q80X50|UBP2L_MOUSE	260.36	17	17	83422	11	11	56	Carbamidomethylation; Oxidation (M); Acetylation (Protein N-term); Deamidation (NQ)	116799	Ubiquitin-associated protein 2-like OS=Mus musculus OX=10090 GN=Ubap2l PE=1 SV=1
89	83	Q501J6|DDX17_MOUSE	259.63	15	15	40875	8	4	36	Carbamidomethylation; Oxidation (M); Deamidation (NQ)	72400	Probable ATP-dependent RNA helicase DDX17 OS=Mus musculus OX=10090 GN=Ddx17 PE=1 SV=1
81	25	Q6P5H2|NEST_MOUSE	259.34	7	7	245520	11	11	38	Carbamidomethylation; Oxidation (M); Deamidation (NQ)	207122	Nestin OS=Mus musculus OX=10090 GN=Nes PE=1 SV=1
93	49	Q8BYK6|YTHD3_MOUSE	259.21	22	22	46560	10	7	34	Oxidation (M); Acetylation (Protein N-term); Deamidation (NQ)	63961	YTH domain-containing family protein 3 OS=Mus musculus OX=10090 GN=Ythdf3 PE=1 SV=2
144	107	D3YXK2|SAFB1_MOUSE	258.96	13	13	29820	8	6	25	Carbamidomethylation; Oxidation (M); Acetylation (Protein N-term); Deamidation (NQ)	105104	Scaffold attachment factor B1 OS=Mus musculus OX=10090 GN=Safb PE=1 SV=2
51	28	Q7TQH0|ATX2L_MOUSE	257.99	15	15	104600	12	12	52	Oxidation (M); Acetylation (Protein N-term); Deamidation (NQ)	110649	Ataxin-2-like protein OS=Mus musculus OX=10090 GN=Atxn2l PE=1 SV=1
21	277	P43276|H15_MOUSE	257.45	26	26	1481900	7	7	113	Acetylation (Protein N-term); Deamidation (NQ)	22576	Histone H1.5 OS=Mus musculus OX=10090 GN=H1-5 PE=1 SV=2
18	139	P62960|YBOX1_MOUSE	255.96	49	49	154650	7	6	117	Acetylation (Protein N-term); Deamidation (NQ)	35730	Y-box-binding protein 1 OS=Mus musculus OX=10090 GN=Ybx1 PE=1 SV=3
30	94	Q08288|LYAR_MOUSE	254.28	28	28	65535	9	9	77	Carbamidomethylation; Deamidation (NQ)	43736	Cell growth-regulating nucleolar protein OS=Mus musculus OX=10090 GN=Lyar PE=1 SV=2
90	55	P20029|BIP_MOUSE	253.44	19	19	69165	9	8	35	Deamidation (NQ)	72422	Endoplasmic reticulum chaperone BiP OS=Mus musculus OX=10090 GN=Hspa5 PE=1 SV=3
118	27	Q6P4T2|U520_MOUSE	252.87	6	6	17810	12	12	29	Carbamidomethylation; Oxidation (M)	244544	U5 small nuclear ribonucleoprotein 200 kDa helicase OS=Mus musculus OX=10090 GN=Snrnp200 PE=1 SV=1
38	111	P47963|RL13_MOUSE	250.86	32	32	704290	9	9	66	Oxidation (M); Deamidation (NQ)	24305	60S ribosomal protein L13 OS=Mus musculus OX=10090 GN=Rpl13 PE=1 SV=3
150	137	Q6DFW4|NOP58_MOUSE	250.31	14	14	70939	5	5	24	Carbamidomethylation; Oxidation (M)	60343	Nucleolar protein 58 OS=Mus musculus OX=10090 GN=Nop58 PE=1 SV=1
27	58	Q62167|DDX3X_MOUSE	247.29	13	13	194670	8	7	95	Carbamidomethylation; Oxidation (M); Deamidation (NQ)	73102	ATP-dependent RNA helicase DDX3X OS=Mus musculus OX=10090 GN=Ddx3x PE=1 SV=3
46	50	P58771|TPM1_MOUSE	243.85	37	37	50436	10	3	55	Carbamidomethylation; Oxidation (M); Deamidation (NQ)	32681	Tropomyosin alpha-1 chain OS=Mus musculus OX=10090 GN=Tpm1 PE=1 SV=1
120	52	Q8K1N4|SPAS2_MOUSE	243.52	23	23	13184	9	9	28	Carbamidomethylation; Oxidation (M); Deamidation (NQ)	58956	Spermatogenesis-associated serine-rich protein 2 OS=Mus musculus OX=10090 GN=Spats2 PE=1 SV=1
92	96	Q6IRU2|TPM4_MOUSE	243.47	29	29	132790	10	8	35	Carbamidomethylation; Oxidation (M); Acetylation (Protein N-term); Deamidation (NQ)	28468	Tropomyosin alpha-4 chain OS=Mus musculus OX=10090 GN=Tpm4 PE=1 SV=3
128	34	Q8BKI2|TNR6B_MOUSE	243.28	9	9	5987.7	10	10	27	Carbamidomethylation; Oxidation (M); Deamidation (NQ)	191962	Trinucleotide repeat-containing gene 6B protein OS=Mus musculus OX=10090 GN=Tnrc6b PE=1 SV=2
167	150	Q8VC70|RBMS2_MOUSE	242.74	23	23	26030	6	6	22	Carbamidomethylation; Oxidation (M); Deamidation (NQ)	40724	RNA-binding motif single-stranded-interacting protein 2 OS=Mus musculus OX=10090 GN=Rbms2 PE=1 SV=1
60	41	Q9Z315|SNUT1_MOUSE	242.36	16	16	23558	10	10	49		90885	U4/U6.U5 tri-snRNP-associated protein 1 OS=Mus musculus OX=10090 GN=Sart1 PE=1 SV=1
53	47	P97351|RS3A_MOUSE	241.21	38	38	261760	11	11	52	Carbamidomethylation; Oxidation (M); Deamidation (NQ)	29885	40S ribosomal protein S3a OS=Mus musculus OX=10090 GN=Rps3a PE=1 SV=3
61	24	Q80U93|NU214_MOUSE	240.72	8	8	25544	12	12	49	Carbamidomethylation; Oxidation (M); Deamidation (NQ)	212977	Nuclear pore complex protein Nup214 OS=Mus musculus OX=10090 GN=Nup214 PE=1 SV=2
98	36	Q99NB9|SF3B1_MOUSE	240.51	11	11	10138	11	11	34	Carbamidomethylation; Deamidation (NQ)	145816	Splicing factor 3B subunit 1 OS=Mus musculus OX=10090 GN=Sf3b1 PE=1 SV=1
109	42	E9Q5G3|KIF23_MOUSE	239.91	14	14	9688.7	10	10	30	Carbamidomethylation; Oxidation (M); Deamidation (NQ)	108776	Kinesin-like protein KIF23 OS=Mus musculus OX=10090 GN=Kif23 PE=1 SV=1
184	30	Q9JKF1|IQGA1_MOUSE	239.19	7	7	10771	10	10	19	Carbamidomethylation; Oxidation (M); Deamidation (NQ)	188741	Ras GTPase-activating-like protein IQGAP1 OS=Mus musculus OX=10090 GN=Iqgap1 PE=1 SV=2
145	130	Q8CH25|SLTM_MOUSE	238.72	8	8	40319	7	7	25	Carbamidomethylation; Oxidation (M); Acetylation (Protein N-term)	116920	SAFB-like transcription modulator OS=Mus musculus OX=10090 GN=Sltm PE=1 SV=1
68	89	P29341|PABP1_MOUSE	236.92	12	12	72249	7	7	45	Oxidation (M); Deamidation (NQ)	70671	Polyadenylate-binding protein 1 OS=Mus musculus OX=10090 GN=Pabpc1 PE=1 SV=2
100	51	O70133|DHX9_MOUSE	236.86	9	9	76495	10	10	33	Carbamidomethylation; Oxidation (M); Deamidation (NQ)	149474	ATP-dependent RNA helicase A OS=Mus musculus OX=10090 GN=Dhx9 PE=1 SV=2
141	59	P57780|ACTN4_MOUSE	236.34	14	14	7811.1	9	6	25	Carbamidomethylation; Deamidation (NQ)	104977	Alpha-actinin-4 OS=Mus musculus OX=10090 GN=Actn4 PE=1 SV=1
96	66	Q9Z0U1|ZO2_MOUSE	236.19	9	9	11375	8	8	34	Deamidation (NQ)	131280	Tight junction protein ZO-2 OS=Mus musculus OX=10090 GN=Tjp2 PE=1 SV=2
115	31	Q91ZW3|SMCA5_MOUSE	235.82	11	11	16810	10	10	29	Carbamidomethylation	121627	SWI/SNF-related matrix-associated actin-dependent regulator of chromatin subfamily A member 5 OS=Mus musculus OX=10090 GN=Smarca5 PE=1 SV=1
142	54	Q8K4G5|ABLM1_MOUSE	235.21	13	13	27435	9	9	25	Carbamidomethylation; Oxidation (M); Deamidation (NQ)	96805	Actin-binding LIM protein 1 OS=Mus musculus OX=10090 GN=Ablim1 PE=1 SV=1
88	84	Q91YK2|RRP1B_MOUSE	234.71	16	16	53260	8	8	36	Oxidation (M); Acetylation (Protein N-term); Deamidation (NQ)	80582	Ribosomal RNA processing protein 1 homolog B OS=Mus musculus OX=10090 GN=Rrp1b PE=1 SV=2
104	44	Q8VHX6|FLNC_MOUSE	234.35	5	5	4830.8	9	6	32	Carbamidomethylation; Deamidation (NQ)	291117	Filamin-C OS=Mus musculus OX=10090 GN=Flnc PE=1 SV=3
110	32	O88532|ZFR_MOUSE	234.18	15	15	22796	11	11	30	Carbamidomethylation; Oxidation (M); Deamidation (NQ)	116859	Zinc finger RNA-binding protein OS=Mus musculus OX=10090 GN=Zfr PE=1 SV=2
70	155	P12970|RL7A_MOUSE	232.72	25	25	460030	6	6	44	Carbamidomethylation; Oxidation (M); Deamidation (NQ)	29977	60S ribosomal protein L7a OS=Mus musculus OX=10090 GN=Rpl7a PE=1 SV=2
13	109	Q8K363|DDX18_MOUSE	231.63	15	15	109480	8	8	171	Oxidation (M); Deamidation (NQ)	74181	ATP-dependent RNA helicase DDX18 OS=Mus musculus OX=10090 GN=Ddx18 PE=1 SV=1
17	206	Q3THE2|ML12B_MOUSE	231.38	30	30	728260	5	2	127	Oxidation (M); Deamidation (NQ)	19779	Myosin regulatory light chain 12B OS=Mus musculus OX=10090 GN=Myl12b PE=1 SV=2
129	21	P48678|LMNA_MOUSE	231.24	25	25	31482	13	12	27	Carbamidomethylation; Oxidation (M); Deamidation (NQ)	74238	Prelamin-A/C OS=Mus musculus OX=10090 GN=Lmna PE=1 SV=2
197	90	Q60598|SRC8_MOUSE	231.22	16	16	73185	8	8	18		61250	Src substrate cortactin OS=Mus musculus OX=10090 GN=Cttn PE=1 SV=2
41	127	Q6URW6|MYH14_MOUSE	230.9	3	3	0	6	1	59	Carbamidomethylation; Deamidation (NQ)	228584	Myosin-14 OS=Mus musculus OX=10090 GN=Myh14 PE=1 SV=1
111	48	Q99PV0|PRP8_MOUSE	227.18	5	5	11813	9	9	30	Oxidation (M); Deamidation (NQ)	273615	Pre-mRNA-processing-splicing factor 8 OS=Mus musculus OX=10090 GN=Prpf8 PE=1 SV=2
45	182	Q8BG05|ROA3_MOUSE	225.73	18	18	315350	5	5	55	Carbamidomethylation; Oxidation (M); Acetylation (Protein N-term)	39652	Heterogeneous nuclear ribonucleoprotein A3 OS=Mus musculus OX=10090 GN=Hnrnpa3 PE=1 SV=1
116	39	Q8CJF7|ELYS_MOUSE	225.05	7	7	16985	10	10	29	Carbamidomethylation	247644	Protein ELYS OS=Mus musculus OX=10090 GN=Ahctf1 PE=1 SV=1
236	125	Q9EPU4|CPSF1_MOUSE	224.65	6	6	25899	6	6	15	Carbamidomethylation; Oxidation (M); Deamidation (NQ)	160818	Cleavage and polyadenylation specificity factor subunit 1 OS=Mus musculus OX=10090 GN=Cpsf1 PE=1 SV=1
49	412	P43275|H11_MOUSE	224.2	22	22	552940	5	4	54	Acetylation (Protein N-term); Deamidation (NQ)	21785	Histone H1.1 OS=Mus musculus OX=10090 GN=H1-1 PE=1 SV=2
72	113	P99024|TBB5_MOUSE	223.16	17	17	31970	7	1	43	Carbamidomethylation; Oxidation (M); Deamidation (NQ)	49671	Tubulin beta-5 chain OS=Mus musculus OX=10090 GN=Tubb5 PE=1 SV=1
48	201	Q9ESX5|DKC1_MOUSE	222.74	13	13	41422	6	6	55	Carbamidomethylation; Acetylation (Protein N-term); Deamidation (NQ)	57402	H/ACA ribonucleoprotein complex subunit DKC1 OS=Mus musculus OX=10090 GN=Dkc1 PE=1 SV=4
201	81	Q9CZU3|MTREX_MOUSE	222.45	9	9	22162	8	8	18	Oxidation (M)	117636	Exosome RNA helicase MTR4 OS=Mus musculus OX=10090 GN=Mtrex PE=1 SV=1
62	92	Q9CWF2|TBB2B_MOUSE	221.91	20	20	7138.9	8	2	49	Carbamidomethylation; Oxidation (M); Deamidation (NQ)	49953	Tubulin beta-2B chain OS=Mus musculus OX=10090 GN=Tubb2b PE=1 SV=1
154	215	Q9D824|FIP1_MOUSE	221.68	12	12	39636	5	5	24	Oxidation (M); Deamidation (NQ)	64959	Pre-mRNA 3'-end-processing factor FIP1 OS=Mus musculus OX=10090 GN=Fip1l1 PE=1 SV=1
117	82	Q8R081|HNRPL_MOUSE	221.65	22	22	45394	8	8	29	Carbamidomethylation; Oxidation (M); Deamidation (NQ)	63964	Heterogeneous nuclear ribonucleoprotein L OS=Mus musculus OX=10090 GN=Hnrnpl PE=1 SV=2
101	79	Q8K224|NAT10_MOUSE	221.65	8	8	34849	7	7	33	Carbamidomethylation; Oxidation (M); Deamidation (NQ)	115418	RNA cytidine acetyltransferase OS=Mus musculus OX=10090 GN=Nat10 PE=1 SV=1
135	56	A2BH40|ARI1A_MOUSE	220.37	7	7	6034.4	9	8	26	Acetylation (Protein N-term); Deamidation (NQ)	242089	AT-rich interactive domain-containing protein 1A OS=Mus musculus OX=10090 GN=Arid1a PE=1 SV=1
66	153	Q9D8E6|RL4_MOUSE	219.93	15	15	232140	6	6	47	Carbamidomethylation; Oxidation (M); Deamidation (NQ)	47154	60S ribosomal protein L4 OS=Mus musculus OX=10090 GN=Rpl4 PE=1 SV=3
127	74	Q9Z1X4|ILF3_MOUSE	219.51	19	19	57931	9	9	27	Oxidation (M); Deamidation (NQ)	96021	Interleukin enhancer-binding factor 3 OS=Mus musculus OX=10090 GN=Ilf3 PE=1 SV=2
139	400	P62264|RS14_MOUSE	218.69	28	28	234370	4	4	26	Oxidation (M)	16273	40S ribosomal protein S14 OS=Mus musculus OX=10090 GN=Rps14 PE=1 SV=3
156	269	P16858|G3P_MOUSE	218.69	17	17	80056	4	4	24	Carbamidomethylation; Oxidation (M); Deamidation (NQ)	35810	Glyceraldehyde-3-phosphate dehydrogenase OS=Mus musculus OX=10090 GN=Gapdh PE=1 SV=2
162	63	P58252|EF2_MOUSE	218.64	12	12	36411	9	9	22	Carbamidomethylation; Oxidation (M); Deamidation (NQ)	95314	Elongation factor 2 OS=Mus musculus OX=10090 GN=Eef2 PE=1 SV=2
95	46	Q6A068|CDC5L_MOUSE	218.38	12	12	15461	8	8	34	Oxidation (M)	92190	Cell division cycle 5-like protein OS=Mus musculus OX=10090 GN=Cdc5l PE=1 SV=2
86	114	P68372|TBB4B_MOUSE	217.49	17	17	17889	7	1	37	Carbamidomethylation; Oxidation (M); Deamidation (NQ)	49831	Tubulin beta-4B chain OS=Mus musculus OX=10090 GN=Tubb4b PE=1 SV=1
185	67	P38647|GRP75_MOUSE	215.21	17	17	31653	8	8	19	Carbamidomethylation; Oxidation (M); Deamidation (NQ)	73461	Stress-70 protein mitochondrial OS=Mus musculus OX=10090 GN=Hspa9 PE=1 SV=3
222	68	P26039|TLN1_MOUSE	213.99	4	4	3526.6	7	7	16	Carbamidomethylation; Deamidation (NQ)	269819	Talin-1 OS=Mus musculus OX=10090 GN=Tln1 PE=1 SV=2
130	209	P62754|RS6_MOUSE	213.65	23	23	303470	5	5	27	Carbamidomethylation; Oxidation (M); Deamidation (NQ)	28681	40S ribosomal protein S6 OS=Mus musculus OX=10090 GN=Rps6 PE=1 SV=1
234	301	Q9Z130|HNRDL_MOUSE	213.14	17	17	10585	4	3	16	Carbamidomethylation; Acetylation (Protein N-term)	33559	Heterogeneous nuclear ribonucleoprotein D-like OS=Mus musculus OX=10090 GN=Hnrnpdl PE=1 SV=1
91	136	Q8K310|MATR3_MOUSE	213.06	8	8	83314	6	6	35	Oxidation (M); Deamidation (NQ)	94630	Matrin-3 OS=Mus musculus OX=10090 GN=Matr3 PE=1 SV=1
119	57	Q921M3|SF3B3_MOUSE	212.9	9	9	14136	8	8	28	Carbamidomethylation; Oxidation (M); Deamidation (NQ)	135550	Splicing factor 3B subunit 3 OS=Mus musculus OX=10090 GN=Sf3b3 PE=1 SV=1
146	76	Q7TSC1|PRC2A_MOUSE	211.99	6	6	6740.8	8	8	25	Deamidation (NQ)	229200	Protein PRRC2A OS=Mus musculus OX=10090 GN=Prrc2a PE=1 SV=1
136	99	Q8CI11|GNL3_MOUSE	210.55	16	16	45955	6	6	26	Carbamidomethylation; Oxidation (M); Deamidation (NQ)	60787	Guanine nucleotide-binding protein-like 3 OS=Mus musculus OX=10090 GN=Gnl3 PE=1 SV=2
275	104	P30999|CTND1_MOUSE	209.84	8	8	5423.4	6	6	13	Oxidation (M); Acetylation (Protein N-term); Deamidation (NQ)	104925	Catenin delta-1 OS=Mus musculus OX=10090 GN=Ctnnd1 PE=1 SV=2
124	273	P62242|RS8_MOUSE	209.32	25	25	430400	4	4	28	Carbamidomethylation; Deamidation (NQ)	24205	40S ribosomal protein S8 OS=Mus musculus OX=10090 GN=Rps8 PE=1 SV=2
211	204	Q9Z0N1|IF2G_MOUSE	208.83	15	15	37480	5	5	18	Carbamidomethylation; Acetylation (Protein N-term)	51066	Eukaryotic translation initiation factor 2 subunit 3 X-linked OS=Mus musculus OX=10090 GN=Eif2s3x PE=1 SV=2
65	293	P62702|RS4X_MOUSE	207.59	19	19	325940	4	4	47	Carbamidomethylation; Oxidation (M); Deamidation (NQ)	29598	40S ribosomal protein S4 X isoform OS=Mus musculus OX=10090 GN=Rps4x PE=1 SV=2
214	148	Q7TPR4|ACTN1_MOUSE	206.56	8	8	2295.4	5	2	17	Carbamidomethylation; Oxidation (M); Deamidation (NQ)	103068	Alpha-actinin-1 OS=Mus musculus OX=10090 GN=Actn1 PE=1 SV=1
134	106	Q6P5B0|RRP12_MOUSE	206.54	7	7	39825	7	7	26	Carbamidomethylation; Oxidation (M); Deamidation (NQ)	143131	RRP12-like protein OS=Mus musculus OX=10090 GN=Rrp12 PE=1 SV=1
217	345	O35295|PURB_MOUSE	206.5	18	18	22337	3	3	17		33901	Transcriptional activator protein Pur-beta OS=Mus musculus OX=10090 GN=Purb PE=1 SV=3
80	118	P21107|TPM3_MOUSE	205.76	27	27	82469	7	2	39	Oxidation (M)	32994	Tropomyosin alpha-3 chain OS=Mus musculus OX=10090 GN=Tpm3 PE=1 SV=3
176	172	Q9WVM1|RGAP1_MOUSE	205.28	11	11	12358	5	5	20	Carbamidomethylation; Oxidation (M); Deamidation (NQ)	70159	Rac GTPase-activating protein 1 OS=Mus musculus OX=10090 GN=Racgap1 PE=1 SV=1
160	239	Q9CXW4|RL11_MOUSE	205.02	24	24	185050	4	4	22	Oxidation (M); Acetylation (Protein N-term)	20252	60S ribosomal protein L11 OS=Mus musculus OX=10090 GN=Rpl11 PE=1 SV=4
153	406	O35737|HNRH1_MOUSE	204.24	8	8	156080	4	4	24	Carbamidomethylation; Oxidation (M); Acetylation (Protein N-term); Deamidation (NQ)	49199	Heterogeneous nuclear ribonucleoprotein H OS=Mus musculus OX=10090 GN=Hnrnph1 PE=1 SV=3
196	195	Q91VR5|DDX1_MOUSE	204.23	8	8	47528	5	5	18	Carbamidomethylation; Oxidation (M)	82500	ATP-dependent RNA helicase DDX1 OS=Mus musculus OX=10090 GN=Ddx1 PE=1 SV=1
77	88	P11499|HS90B_MOUSE	203.41	13	13	23601	8	3	40	Oxidation (M); Deamidation (NQ)	83281	Heat shock protein HSP 90-beta OS=Mus musculus OX=10090 GN=Hsp90ab1 PE=1 SV=3
151	126	Q91YT7|YTHD2_MOUSE	203.11	12	12	25667	6	4	24	Carbamidomethylation; Acetylation (Protein N-term); Deamidation (NQ)	62280	YTH domain-containing family protein 2 OS=Mus musculus OX=10090 GN=Ythdf2 PE=1 SV=1
94	53	Q9DBR7|MYPT1_MOUSE	202.82	11	11	21362	8	8	34	Carbamidomethylation; Oxidation (M); Deamidation (NQ)	114996	Protein phosphatase 1 regulatory subunit 12A OS=Mus musculus OX=10090 GN=Ppp1r12a PE=1 SV=2
271	135	Q9EPU0|RENT1_MOUSE	202.38	6	6	21011	5	5	13	Carbamidomethylation	123967	Regulator of nonsense transcripts 1 OS=Mus musculus OX=10090 GN=Upf1 PE=1 SV=2
148	147	Q9ESV0|DDX24_MOUSE	201.42	7	7	16795	5	5	24	Carbamidomethylation; Deamidation (NQ)	96429	ATP-dependent RNA helicase DDX24 OS=Mus musculus OX=10090 GN=Ddx24 PE=1 SV=2
85	451	Q9Z2X1|HNRPF_MOUSE	201.26	9	9	163400	4	4	37	Oxidation (M); Acetylation (Protein N-term)	45730	Heterogeneous nuclear ribonucleoprotein F OS=Mus musculus OX=10090 GN=Hnrnpf PE=1 SV=3
74	140	P61979|HNRPK_MOUSE	201.26	14	14	129730	6	6	40	Carbamidomethylation; Oxidation (M)	50976	Heterogeneous nuclear ribonucleoprotein K OS=Mus musculus OX=10090 GN=Hnrnpk PE=1 SV=1
205	120	P35922|FMR1_MOUSE	200.54	13	13	9264.4	6	5	18	Acetylation (Protein N-term)	68989	Synaptic functional regulator FMR1 OS=Mus musculus OX=10090 GN=Fmr1 PE=1 SV=1
152	177	P70318|TIAR_MOUSE	200.02	16	16	21807	6	4	24	Carbamidomethylation; Oxidation (M); Deamidation (NQ)	43389	Nucleolysin TIAR OS=Mus musculus OX=10090 GN=Tial1 PE=1 SV=1
232	236	P49312|ROA1_MOUSE	199.87	15	15	56079	4	4	16	Oxidation (M)	34196	Heterogeneous nuclear ribonucleoprotein A1 OS=Mus musculus OX=10090 GN=Hnrnpa1 PE=1 SV=2
213	69	G5E870|TRIPC_MOUSE	199.83	6	6	6904.8	7	7	17	Carbamidomethylation	224126	E3 ubiquitin-protein ligase TRIP12 OS=Mus musculus OX=10090 GN=Trip12 PE=1 SV=1
55	410	P10922|H10_MOUSE	199.27	19	19	122540	4	4	52	Oxidation (M); Acetylation (Protein N-term); Deamidation (NQ)	20861	Histone H1.0 OS=Mus musculus OX=10090 GN=H1-0 PE=2 SV=4
180	303	P17182|ENOA_MOUSE	199.15	13	13	36523	4	4	20	Carbamidomethylation	47141	Alpha-enolase OS=Mus musculus OX=10090 GN=Eno1 PE=1 SV=3
57	351	Q9JKB3|YBOX3_MOUSE	198.58	19	19	36830	3	2	50	Acetylation (Protein N-term); Deamidation (NQ)	38814	Y-box-binding protein 3 OS=Mus musculus OX=10090 GN=Ybx3 PE=1 SV=2
126	45	Q3TLH4|PRC2C_MOUSE	198.08	4	4	5314.4	8	8	27	Carbamidomethylation	310891	Protein PRRC2C OS=Mus musculus OX=10090 GN=Prrc2c PE=1 SV=3
147	102	O35286|DHX15_MOUSE	197.39	11	11	23295	7	7	25	Carbamidomethylation; Oxidation (M)	91007	Pre-mRNA-splicing factor ATP-dependent RNA helicase DHX15 OS=Mus musculus OX=10090 GN=Dhx15 PE=1 SV=2
73	278	P0DP27|CALM2_MOUSE	197.37	32	32	547320	5	5	43	Oxidation (M); Acetylation (Protein N-term); Deamidation (NQ)	16838	Calmodulin-2 OS=Mus musculus OX=10090 GN=Calm2 PE=1 SV=1
73	279	P0DP28|CALM3_MOUSE	197.37	32	32	547320	5	5	43	Oxidation (M); Acetylation (Protein N-term); Deamidation (NQ)	16838	Calmodulin-3 OS=Mus musculus OX=10090 GN=Calm3 PE=1 SV=1
73	280	P0DP26|CALM1_MOUSE	197.37	32	32	547320	5	5	43	Oxidation (M); Acetylation (Protein N-term); Deamidation (NQ)	16838	Calmodulin-1 OS=Mus musculus OX=10090 GN=Calm1 PE=1 SV=1
311	404	Q9CYA6|ZCHC8_MOUSE	196.97	7	7	1580.2	3	3	12	Carbamidomethylation; Oxidation (M)	78026	Zinc finger CCHC domain-containing protein 8 OS=Mus musculus OX=10090 GN=Zcchc8 PE=1 SV=3
230	382	P47754|CAZA2_MOUSE	196.86	20	20	43745	4	4	16	Oxidation (M); Acetylation (Protein N-term)	32967	F-actin-capping protein subunit alpha-2 OS=Mus musculus OX=10090 GN=Capza2 PE=1 SV=3
105	248	Q8VEK3|HNRPU_MOUSE	196.77	6	6	143450	4	4	32	Oxidation (M); Acetylation (Protein N-term); Deamidation (NQ)	87918	Heterogeneous nuclear ribonucleoprotein U OS=Mus musculus OX=10090 GN=Hnrnpu PE=1 SV=1
225	175	Q61029|LAP2B_MOUSE	196.6	16	16	5462.9	5	2	16	Carbamidomethylation; Deamidation (NQ)	50373	Lamina-associated polypeptide 2 isoforms beta/delta/epsilon/gamma OS=Mus musculus OX=10090 GN=Tmpo PE=1 SV=4
37	186	P02535|K1C10_MOUSE	195.54	9	9	220680	5	3	66	Oxidation (M); Deamidation (NQ)	57770	Keratin type I cytoskeletal 10 OS=Mus musculus OX=10090 GN=Krt10 PE=1 SV=3
161	160	Q3TTY5|K22E_MOUSE	194.91	7	7	100920	5	3	22	Carbamidomethylation; Oxidation (M)	70923	Keratin type II cytoskeletal 2 epidermal OS=Mus musculus OX=10090 GN=Krt2 PE=1 SV=1
341	65	E9Q634|MYO1E_MOUSE	194.9	7	7	26472	7	7	10	Carbamidomethylation; Oxidation (M); Deamidation (NQ)	126818	Unconventional myosin-Ie OS=Mus musculus OX=10090 GN=Myo1e PE=1 SV=1
260	210	Q9Z108|STAU1_MOUSE	194.71	12	12	30575	5	5	14	Carbamidomethylation; Oxidation (M); Deamidation (NQ)	53925	Double-stranded RNA-binding protein Staufen homolog 1 OS=Mus musculus OX=10090 GN=Stau1 PE=1 SV=1
255	221	Q9JJ28|FLII_MOUSE	194.02	4	4	30955	4	4	14	Oxidation (M); Acetylation (Protein N-term)	144803	Protein flightless-1 homolog OS=Mus musculus OX=10090 GN=Flii PE=1 SV=1
140	62	Q9Z277|BAZ1B_MOUSE	193.7	7	7	9685.8	8	8	25	Carbamidomethylation; Oxidation (M); Deamidation (NQ)	170650	Tyrosine-protein kinase BAZ1B OS=Mus musculus OX=10090 GN=Baz1b PE=1 SV=2
149	97	Q91YR7|PRP6_MOUSE	193.46	9	9	924930	7	7	24	Carbamidomethylation; Deamidation (NQ)	106722	Pre-mRNA-processing factor 6 OS=Mus musculus OX=10090 GN=Prpf6 PE=1 SV=1
97	284	P19253|RL13A_MOUSE	193.25	22	22	513130	4	4	34	Carbamidomethylation; Acetylation (Protein N-term); Deamidation (NQ)	23464	60S ribosomal protein L13a OS=Mus musculus OX=10090 GN=Rpl13a PE=1 SV=4
67	296	P62751|RL23A_MOUSE	192.84	27	27	628200	4	4	46	Oxidation (M)	17695	60S ribosomal protein L23a OS=Mus musculus OX=10090 GN=Rpl23a PE=1 SV=1
102	271	P62908|RS3_MOUSE	192.77	22	22	144530	4	4	32	Carbamidomethylation; Oxidation (M); Deamidation (NQ)	26674	40S ribosomal protein S3 OS=Mus musculus OX=10090 GN=Rps3 PE=1 SV=1
54	202	Q8CI43|MYL6B_MOUSE	192.26	29	29	9310.1	5	4	52	Carbamidomethylation; Oxidation (M); Deamidation (NQ)	22749	Myosin light chain 6B OS=Mus musculus OX=10090 GN=Myl6b PE=1 SV=1
350	272	Q8BI72|CARF_MOUSE	192.1	9	9	1852.4	4	4	10	Acetylation (Protein N-term)	59745	CDKN2A-interacting protein OS=Mus musculus OX=10090 GN=Cdkn2aip PE=1 SV=1
79	123	Q9JHJ0|TMOD3_MOUSE	191.97	18	18	71299	6	6	39	Oxidation (M); Deamidation (NQ)	39503	Tropomodulin-3 OS=Mus musculus OX=10090 GN=Tmod3 PE=1 SV=1
294	208	O88291|ZN326_MOUSE	191.48	10	10	13442	5	5	13	Carbamidomethylation; Oxidation (M); Acetylation (Protein N-term)	65225	DBIRD complex subunit ZNF326 OS=Mus musculus OX=10090 GN=Znf326 PE=1 SV=1
75	808	P35979|RL12_MOUSE	191.39	19	19	322210	2	2	41	Carbamidomethylation; Deamidation (NQ)	17805	60S ribosomal protein L12 OS=Mus musculus OX=10090 GN=Rpl12 PE=1 SV=2
317	167	Q91WK0|LRRF2_MOUSE	190.8	15	15	28214	5	5	11	Oxidation (M); Deamidation (NQ)	47148	Leucine-rich repeat flightless-interacting protein 2 OS=Mus musculus OX=10090 GN=Lrrfip2 PE=1 SV=1
290	398	Q9CYI4|LUC7L_MOUSE	190.79	11	11	16985	3	2	13	Oxidation (M); Deamidation (NQ)	43934	Putative RNA-binding protein Luc7-like 1 OS=Mus musculus OX=10090 GN=Luc7l PE=1 SV=2
371	178	O70305|ATX2_MOUSE	190.64	6	6	4371.6	5	5	9	Carbamidomethylation	136485	Ataxin-2 OS=Mus musculus OX=10090 GN=Atxn2 PE=1 SV=1
253	164	Q03265|ATPA_MOUSE	190.51	12	12	13810	5	5	14	Oxidation (M); Deamidation (NQ)	59753	ATP synthase subunit alpha mitochondrial OS=Mus musculus OX=10090 GN=Atp5f1a PE=1 SV=1
123	115	P07901|HS90A_MOUSE	190.51	11	11	15671	7	3	28	Oxidation (M); Deamidation (NQ)	84788	Heat shock protein HSP 90-alpha OS=Mus musculus OX=10090 GN=Hsp90aa1 PE=1 SV=4
200	218	Q922P9|GLYR1_MOUSE	190.34	11	11	10072	4	4	18	Carbamidomethylation; Oxidation (M); Deamidation (NQ)	59716	Putative oxidoreductase GLYR1 OS=Mus musculus OX=10090 GN=Glyr1 PE=1 SV=1
194	78	Q5SYD0|MYO1D_MOUSE	189.98	8	8	37544	8	8	18	Carbamidomethylation	116081	Unconventional myosin-Id OS=Mus musculus OX=10090 GN=Myo1d PE=1 SV=1
256	131	Q7TMK9|HNRPQ_MOUSE	189.93	14	14	23427	6	6	14	Oxidation (M)	69633	Heterogeneous nuclear ribonucleoprotein Q OS=Mus musculus OX=10090 GN=Syncrip PE=1 SV=2
122	819	P41105|RL28_MOUSE	189.78	18	18	255200	4	4	28	Deamidation (NQ)	15733	60S ribosomal protein L28 OS=Mus musculus OX=10090 GN=Rpl28 PE=1 SV=2
415	312	Q3TJZ6|FA98A_MOUSE	189.6	9	9	14921	4	4	8	Carbamidomethylation	55055	Protein FAM98A OS=Mus musculus OX=10090 GN=Fam98a PE=1 SV=1
202	169	P63101|1433Z_MOUSE	188.29	25	25	53854	5	5	18	Carbamidomethylation; Oxidation (M); Acetylation (Protein N-term); Deamidation (NQ)	27771	14-3-3 protein zeta/delta OS=Mus musculus OX=10090 GN=Ywhaz PE=1 SV=1
121	129	Q8R0X7|SGPL1_MOUSE	188.19	13	13	56409	6	6	28	Oxidation (M); Deamidation (NQ)	63677	Sphingosine-1-phosphate lyase 1 OS=Mus musculus OX=10090 GN=Sgpl1 PE=1 SV=1
227	116	P46735|MYO1B_MOUSE	187.76	7	7	19638	7	7	16	Carbamidomethylation; Oxidation (M); Deamidation (NQ)	128564	Unconventional myosin-Ib OS=Mus musculus OX=10090 GN=Myo1b PE=1 SV=3
296	85	Q640M1|UT14A_MOUSE	186.59	11	11	10211	7	7	12	Oxidation (M); Deamidation (NQ)	87265	U3 small nucleolar RNA-associated protein 14 homolog A OS=Mus musculus OX=10090 GN=Utp14a PE=1 SV=1
417	247	P97314|CSRP2_MOUSE	186.51	26	26	5210.2	4	4	8	Carbamidomethylation	20926	Cysteine and glycine-rich protein 2 OS=Mus musculus OX=10090 GN=Csrp2 PE=1 SV=3
298	145	Q8VIJ6|SFPQ_MOUSE	185.86	10	10	16758	5	5	12	Oxidation (M)	75442	Splicing factor proline- and glutamine-rich OS=Mus musculus OX=10090 GN=Sfpq PE=1 SV=1
43	421	P62270|RS18_MOUSE	185.76	21	21	340330	3	3	58	Oxidation (M); Deamidation (NQ)	17719	40S ribosomal protein S18 OS=Mus musculus OX=10090 GN=Rps18 PE=1 SV=3
206	142	P07356|ANXA2_MOUSE	185.62	19	19	23679	6	6	18	Carbamidomethylation; Acetylation (Protein N-term)	38676	Annexin A2 OS=Mus musculus OX=10090 GN=Anxa2 PE=1 SV=2
251	171	Q0VBL3|RBM15_MOUSE	185.24	6	6	8206.7	4	4	14		105722	RNA-binding protein 15 OS=Mus musculus OX=10090 GN=Rbm15 PE=1 SV=1
203	162	P59326|YTHD1_MOUSE	185.23	11	11	1634.3	5	2	18	Oxidation (M)	60879	YTH domain-containing family protein 1 OS=Mus musculus OX=10090 GN=Ythdf1 PE=1 SV=1
293	205	P52480|KPYM_MOUSE	185.22	12	12	19703	6	6	13	Carbamidomethylation; Oxidation (M); Deamidation (NQ)	57845	Pyruvate kinase PKM OS=Mus musculus OX=10090 GN=Pkm PE=1 SV=4
224	98	P14873|MAP1B_MOUSE	185.12	5	5	3648.4	6	6	16	Acetylation (Protein N-term)	270252	Microtubule-associated protein 1B OS=Mus musculus OX=10090 GN=Map1b PE=1 SV=2
163	117	P47757|CAPZB_MOUSE	184.41	30	30	49631	7	7	22	Carbamidomethylation; Oxidation (M); Acetylation (Protein N-term); Deamidation (NQ)	31345	F-actin-capping protein subunit beta OS=Mus musculus OX=10090 GN=Capzb PE=1 SV=3
414	274	Q8CI61|BAG4_MOUSE	184.13	12	12	4607.1	4	4	8		49095	BAG family molecular chaperone regulator 4 OS=Mus musculus OX=10090 GN=Bag4 PE=1 SV=2
29	292	Q9CQ19|MYL9_MOUSE	184.1	23	23	4204.5	4	1	88	Oxidation (M); Deamidation (NQ)	19854	Myosin regulatory light polypeptide 9 OS=Mus musculus OX=10090 GN=Myl9 PE=1 SV=3
358	282	P17751|TPIS_MOUSE	183.83	17	17	5991.3	4	4	10	Carbamidomethylation; Deamidation (NQ)	32192	Triosephosphate isomerase OS=Mus musculus OX=10090 GN=Tpi1 PE=1 SV=4
250	122	Q99KG3|RBM10_MOUSE	183.12	8	8	9509.4	6	6	14		103494	RNA-binding protein 10 OS=Mus musculus OX=10090 GN=Rbm10 PE=1 SV=1
195	141	Q99LF4|RTCB_MOUSE	183.02	11	11	54869	5	5	18	Oxidation (M)	55249	RNA-splicing ligase RtcB homolog OS=Mus musculus OX=10090 GN=Rtcb PE=1 SV=1
220	119	O35218|CPSF2_MOUSE	183	10	10	8007.1	7	7	17	Carbamidomethylation; Oxidation (M)	88383	Cleavage and polyadenylation specificity factor subunit 2 OS=Mus musculus OX=10090 GN=Cpsf2 PE=1 SV=1
158	234	P56959|FUS_MOUSE	182.98	11	11	239620	4	4	23	Carbamidomethylation; Oxidation (M); Deamidation (NQ)	52673	RNA-binding protein FUS OS=Mus musculus OX=10090 GN=Fus PE=1 SV=1
193	320	Q8BVY0|RL1D1_MOUSE	182.02	13	13	55853	4	4	19	Carbamidomethylation	50421	Ribosomal L1 domain-containing protein 1 OS=Mus musculus OX=10090 GN=Rsl1d1 PE=1 SV=1
270	108	P35601|RFC1_MOUSE	181.93	8	8	10066	6	6	13	Carbamidomethylation; Deamidation (NQ)	125985	Replication factor C subunit 1 OS=Mus musculus OX=10090 GN=Rfc1 PE=1 SV=2
268	87	Q61464|ZN638_MOUSE	181.66	4	4	3320.4	6	6	13	Deamidation (NQ)	218132	Zinc finger protein 638 OS=Mus musculus OX=10090 GN=Znf638 PE=1 SV=2
276	161	F8VPU2|FARP1_MOUSE	181.57	7	7	14804	6	6	13	Oxidation (M); Acetylation (Protein N-term)	118875	FERM ARHGEF and pleckstrin domain-containing protein 1 OS=Mus musculus OX=10090 GN=Farp1 PE=1 SV=1
39	396	P52927|HMGA2_MOUSE	181.43	50	50	90465	5	5	65	Carbamidomethylation; Acetylation (Protein N-term); Deamidation (NQ)	11819	High mobility group protein HMGI-C OS=Mus musculus OX=10090 GN=Hmga2 PE=1 SV=1
239	217	Q5SSI6|UTP18_MOUSE	181.4	11	11	5383.3	5	5	15		61218	U3 small nucleolar RNA-associated protein 18 homolog OS=Mus musculus OX=10090 GN=Utp18 PE=1 SV=1
310	270	Q9D0R8|LSM12_MOUSE	181.23	30	30	34393	4	4	12	Carbamidomethylation; Acetylation (Protein N-term)	21701	Protein LSM12 homolog OS=Mus musculus OX=10090 GN=Lsm12 PE=1 SV=1
103	814	P62717|RL18A_MOUSE	181.1	15	15	285850	2	2	32	Carbamidomethylation; Deamidation (NQ)	20732	60S ribosomal protein L18a OS=Mus musculus OX=10090 GN=Rpl18a PE=1 SV=1
353	170	Q9QWL7|K1C17_MOUSE	181.02	15	15	90.413	5	1	10	Carbamidomethylation	48162	Keratin type I cytoskeletal 17 OS=Mus musculus OX=10090 GN=Krt17 PE=1 SV=3
210	151	P60335|PCBP1_MOUSE	180.97	23	23	5953.4	6	4	18	Carbamidomethylation; Oxidation (M)	37498	Poly(rC)-binding protein 1 OS=Mus musculus OX=10090 GN=Pcbp1 PE=1 SV=1
258	395	Q8C6B9|AROS_MOUSE	180.95	32	32	26102	4	4	14		15978	Active regulator of SIRT1 OS=Mus musculus OX=10090 GN=Rps19bp1 PE=1 SV=1
108	286	P25444|RS2_MOUSE	180.46	17	17	315300	4	4	31	Carbamidomethylation; Oxidation (M); Deamidation (NQ)	31231	40S ribosomal protein S2 OS=Mus musculus OX=10090 GN=Rps2 PE=1 SV=3
186	138	Q00PI9|HNRL2_MOUSE	180.19	8	8	6101.9	5	5	19	Carbamidomethylation; Deamidation (NQ)	84940	Heterogeneous nuclear ribonucleoprotein U-like protein 2 OS=Mus musculus OX=10090 GN=Hnrnpul2 PE=1 SV=2
348	233	Q61033|LAP2A_MOUSE	179.9	8	8	207.57	4	1	10	Deamidation (NQ)	75168	Lamina-associated polypeptide 2 isoforms alpha/zeta OS=Mus musculus OX=10090 GN=Tmpo PE=1 SV=4
166	889	P61514|RL37A_MOUSE	179.55	28	28	397690	2	2	22	Carbamidomethylation; Deamidation (NQ)	10275	60S ribosomal protein L37a OS=Mus musculus OX=10090 GN=Rpl37a PE=1 SV=2
425	154	Q01853|TERA_MOUSE	179.46	11	11	3711.9	6	6	8	Carbamidomethylation; Acetylation (Protein N-term); Deamidation (NQ)	89322	Transitional endoplasmic reticulum ATPase OS=Mus musculus OX=10090 GN=Vcp PE=1 SV=4
69	399	P67984|RL22_MOUSE	179.37	30	30	225390	3	3	45	Deamidation (NQ)	14759	60S ribosomal protein L22 OS=Mus musculus OX=10090 GN=Rpl22 PE=1 SV=2
218	100	Q922U2|K2C5_MOUSE	179.17	12	12	20926	7	5	17	Carbamidomethylation; Oxidation (M)	61767	Keratin type II cytoskeletal 5 OS=Mus musculus OX=10090 GN=Krt5 PE=1 SV=1
279	194	Q8VDN2|AT1A1_MOUSE	178.85	7	7	4413.8	5	5	13	Carbamidomethylation	112982	Sodium/potassium-transporting ATPase subunit alpha-1 OS=Mus musculus OX=10090 GN=Atp1a1 PE=1 SV=1
331	313	Q9DBR0|AKAP8_MOUSE	178.5	7	7	21313	4	4	11	Carbamidomethylation	76294	A-kinase anchor protein 8 OS=Mus musculus OX=10090 GN=Akap8 PE=1 SV=1
342	128	Q6Y7W8|GGYF2_MOUSE	178.47	6	6	3003.2	6	6	10	Oxidation (M)	149192	GRB10-interacting GYF protein 2 OS=Mus musculus OX=10090 GN=Gigyf2 PE=1 SV=2
229	327	Q9DB85|RRP8_MOUSE	177.9	9	9	16273	3	3	16		51066	Ribosomal RNA-processing protein 8 OS=Mus musculus OX=10090 GN=Rrp8 PE=1 SV=1
238	176	Q07076|ANXA7_MOUSE	177.73	12	12	31109	5	5	15	Carbamidomethylation	49925	Annexin A7 OS=Mus musculus OX=10090 GN=Anxa7 PE=1 SV=2
435	294	Q8CAQ8|MIC60_MOUSE	176.34	8	8	4754.6	4	4	8		83900	MICOS complex subunit Mic60 OS=Mus musculus OX=10090 GN=Immt PE=1 SV=1
173	415	Q99020|ROAA_MOUSE	175.64	13	13	35483	3	2	21	Carbamidomethylation; Deamidation (NQ)	30831	Heterogeneous nuclear ribonucleoprotein A/B OS=Mus musculus OX=10090 GN=Hnrnpab PE=1 SV=1
407	124	Q62261|SPTB2_MOUSE	175.36	3	3	6689.4	5	5	8		274221	Spectrin beta chain non-erythrocytic 1 OS=Mus musculus OX=10090 GN=Sptbn1 PE=1 SV=2
254	168	O08784|TCOF_MOUSE	175.19	6	6	10857	5	5	14		135001	Treacle protein OS=Mus musculus OX=10090 GN=Tcof1 PE=1 SV=1
113	369	P04104|K2C1_MOUSE	174.77	5	5	89795	3	1	30	Deamidation (NQ)	65606	Keratin type II cytoskeletal 1 OS=Mus musculus OX=10090 GN=Krt1 PE=1 SV=4
349	254	Q9EQP2|EHD4_MOUSE	174.49	10	10	9128.7	4	4	10	Oxidation (M)	61481	EH domain-containing protein 4 OS=Mus musculus OX=10090 GN=Ehd4 PE=1 SV=1
107	156	Q922F4|TBB6_MOUSE	174.36	15	15	6512.4	6	3	31	Carbamidomethylation; Oxidation (M); Deamidation (NQ)	50090	Tubulin beta-6 chain OS=Mus musculus OX=10090 GN=Tubb6 PE=1 SV=1
178	283	Q6ZWX6|IF2A_MOUSE	174.31	17	17	32783	4	4	20	Carbamidomethylation; Oxidation (M)	36108	Eukaryotic translation initiation factor 2 subunit 1 OS=Mus musculus OX=10090 GN=Eif2s1 PE=1 SV=3
190	211	Q9ERD7|TBB3_MOUSE	173.76	12	12	0	5	1	19	Carbamidomethylation; Oxidation (M)	50419	Tubulin beta-3 chain OS=Mus musculus OX=10090 GN=Tubb3 PE=1 SV=1
283	484	P01630|KV2A6_MOUSE	173.69	21	21	371240	2	2	13	Oxidation (M); Deamidation (NQ)	12496	Ig kappa chain V-II region 7S34.1 OS=Mus musculus OX=10090 PE=1 SV=1
219	251	Q61545|EWS_MOUSE	173.47	11	11	21477	4	4	17	Carbamidomethylation; Oxidation (M)	68462	RNA-binding protein EWS OS=Mus musculus OX=10090 GN=Ewsr1 PE=1 SV=2
233	288	Q7TNC4|LC7L2_MOUSE	173.32	14	14	7836.3	4	3	16	Oxidation (M); Deamidation (NQ)	46583	Putative RNA-binding protein Luc7-like 2 OS=Mus musculus OX=10090 GN=Luc7l2 PE=1 SV=1
164	110	Q3TKT4|SMCA4_MOUSE	173.3	4	4	7771.2	6	6	22	Carbamidomethylation	181426	Transcription activator BRG1 OS=Mus musculus OX=10090 GN=Smarca4 PE=1 SV=1
125	394	Q64337|SQSTM_MOUSE	173.26	15	15	27656	3	3	28	Carbamidomethylation; Oxidation (M); Deamidation (NQ)	48163	Sequestosome-1 OS=Mus musculus OX=10090 GN=Sqstm1 PE=1 SV=1
261	417	Q60668|HNRPD_MOUSE	173.03	10	10	6701.5	3	2	14	Carbamidomethylation	38354	Heterogeneous nuclear ribonucleoprotein D0 OS=Mus musculus OX=10090 GN=Hnrnpd PE=1 SV=2
316	77	Q6NS46|RRP5_MOUSE	172.97	4	4	27908	7	7	11	Carbamidomethylation; Acetylation (Protein N-term); Deamidation (NQ)	207777	Protein RRP5 homolog OS=Mus musculus OX=10090 GN=Pdcd11 PE=1 SV=2
487	191	O55143|AT2A2_MOUSE	172.64	5	5	1276.7	4	4	6	Carbamidomethylation	114858	Sarcoplasmic/endoplasmic reticulum calcium ATPase 2 OS=Mus musculus OX=10090 GN=Atp2a2 PE=1 SV=2
330	207	P62827|RAN_MOUSE	172.41	26	26	36739	5	5	11	Carbamidomethylation; Acetylation (Protein N-term)	24423	GTP-binding nuclear protein Ran OS=Mus musculus OX=10090 GN=Ran PE=1 SV=3
114	297	Q91VM5|RMXL1_MOUSE	172.37	13	13	49173	4	4	30	Oxidation (M); Deamidation (NQ)	42162	RNA binding motif protein X-linked-like-1 OS=Mus musculus OX=10090 GN=Rbmxl1 PE=2 SV=1
466	332	Q64213|SF01_MOUSE	171	5	5	21926	4	4	7	Carbamidomethylation; Acetylation (Protein N-term)	70403	Splicing factor 1 OS=Mus musculus OX=10090 GN=Sf1 PE=1 SV=6
244	431	P01867|IGG2B_MOUSE	170.38	11	11	94934	3	3	15	Carbamidomethylation	44259	Ig gamma-2B chain C region OS=Mus musculus OX=10090 GN=Igh-3 PE=1 SV=3
169	213	P62983|RS27A_MOUSE	170.2	32	32	53241	5	5	21	Deamidation (NQ)	17951	Ubiquitin-40S ribosomal protein S27a OS=Mus musculus OX=10090 GN=Rps27a PE=1 SV=2
351	295	Q9CYL5|GAPR1_MOUSE	169.79	33	33	15701	4	4	10	Carbamidomethylation; Deamidation (NQ)	17090	Golgi-associated plant pathogenesis-related protein 1 OS=Mus musculus OX=10090 GN=Glipr2 PE=1 SV=3
288	212	Q922K7|NOP2_MOUSE	169.78	12	12	12285	5	5	13	Carbamidomethylation; Oxidation (M); Deamidation (NQ)	86752	Probable 28S rRNA (cytosine-C(5))-methyltransferase OS=Mus musculus OX=10090 GN=Nop2 PE=1 SV=1
380	101	Q5XG71|UTP20_MOUSE	169.19	3	3	20822	7	7	9		317744	Small subunit processome component 20 homolog OS=Mus musculus OX=10090 GN=Utp20 PE=1 SV=2
334	424	Q9CQR2|RS21_MOUSE	168.94	41	41	5614.5	3	3	11	Carbamidomethylation; Oxidation (M); Acetylation (Protein N-term)	9141	40S ribosomal protein S21 OS=Mus musculus OX=10090 GN=Rps21 PE=1 SV=1
321	268	P97447|FHL1_MOUSE	168.83	13	13	5763.6	3	3	11	Carbamidomethylation; Deamidation (NQ)	31889	Four and a half LIM domains protein 1 OS=Mus musculus OX=10090 GN=Fhl1 PE=1 SV=3
191	328	Q9CXS4|CENPV_MOUSE	168.66	22	22	2273.4	3	3	19	Deamidation (NQ)	27541	Centromere protein V OS=Mus musculus OX=10090 GN=Cenpv PE=1 SV=2
171	391	Q8VDY9|CAAP1_MOUSE	168.47	14	14	550.33	3	3	21	Carbamidomethylation	37825	Caspase activity and apoptosis inhibitor 1 OS=Mus musculus OX=10090 GN=Caap1 PE=1 SV=2
187	157	Q99ME9|NOG1_MOUSE	167.55	8	8	32610	5	5	19		74113	Nucleolar GTP-binding protein 1 OS=Mus musculus OX=10090 GN=Gtpbp4 PE=1 SV=3
170	418	Q91W59|RBMS1_MOUSE	167.3	9	9	44312	3	3	21	Carbamidomethylation; Deamidation (NQ)	43991	RNA-binding motif single-stranded-interacting protein 1 OS=Mus musculus OX=10090 GN=Rbms1 PE=1 SV=1
208	307	P68373|TBA1C_MOUSE	166.53	10	10	59888	4	4	18	Carbamidomethylation; Oxidation (M)	49909	Tubulin alpha-1C chain OS=Mus musculus OX=10090 GN=Tuba1c PE=1 SV=1
208	308	P68369|TBA1A_MOUSE	166.53	10	10	59888	4	4	18	Carbamidomethylation; Oxidation (M)	50136	Tubulin alpha-1A chain OS=Mus musculus OX=10090 GN=Tuba1a PE=1 SV=1
208	309	P05213|TBA1B_MOUSE	166.53	10	10	59888	4	4	18	Carbamidomethylation; Oxidation (M)	50152	Tubulin alpha-1B chain OS=Mus musculus OX=10090 GN=Tuba1b PE=1 SV=2
189	144	P08551|NFL_MOUSE	166.28	12	12	3109.1	5	4	19	Oxidation (M); Acetylation (Protein N-term)	61509	Neurofilament light polypeptide OS=Mus musculus OX=10090 GN=Nefl PE=1 SV=5
281	193	P08113|ENPL_MOUSE	165.73	7	7	10304	5	4	13	Deamidation (NQ)	92476	Endoplasmin OS=Mus musculus OX=10090 GN=Hsp90b1 PE=1 SV=2
223	224	Q9WVA3|BUB3_MOUSE	164.94	12	12	3772	3	3	16	Carbamidomethylation	36955	Mitotic checkpoint protein BUB3 OS=Mus musculus OX=10090 GN=Bub3 PE=1 SV=2
188	810	P01837|IGKC_MOUSE	164.87	26	26	83808	2	2	19	Oxidation (M); Deamidation (NQ)	11934	Immunoglobulin kappa constant OS=Mus musculus OX=10090 GN=Igkc PE=1 SV=2
221	285	Q61990|PCBP2_MOUSE	164.36	15	15	6609.2	4	2	17	Carbamidomethylation; Oxidation (M)	38222	Poly(rC)-binding protein 2 OS=Mus musculus OX=10090 GN=Pcbp2 PE=1 SV=1
257	256	Q6A0A9|F120A_MOUSE	164.24	5	5	4289.1	4	4	14		121646	Constitutive coactivator of PPAR-gamma-like protein 1 OS=Mus musculus OX=10090 GN=FAM120A PE=1 SV=2
183	223	Q8C854|MYEF2_MOUSE	164.1	10	10	15779	4	4	19	Oxidation (M); Acetylation (Protein N-term); Deamidation (NQ)	63295	Myelin expression factor 2 OS=Mus musculus OX=10090 GN=Myef2 PE=1 SV=1
159	229	Q8VDM6|HNRL1_MOUSE	162.98	8	8	16096	4	4	23	Oxidation (M); Deamidation (NQ)	96002	Heterogeneous nuclear ribonucleoprotein U-like protein 1 OS=Mus musculus OX=10090 GN=Hnrnpul1 PE=1 SV=1
357	266	Q5SUF2|LC7L3_MOUSE	162.98	13	13	8380.8	4	4	10	Oxidation (M); Acetylation (Protein N-term)	51450	Luc7-like protein 3 OS=Mus musculus OX=10090 GN=Luc7l3 PE=1 SV=1
199	152	Q9R0I7|YLPM1_MOUSE	162.44	4	4	16835	5	5	18	Oxidation (M)	155129	YLP motif-containing protein 1 OS=Mus musculus OX=10090 GN=Ylpm1 PE=2 SV=2
273	86	A2AJI0|MA7D1_MOUSE	162.23	10	10	15963	7	7	13	Carbamidomethylation	93276	MAP7 domain-containing protein 1 OS=Mus musculus OX=10090 GN=Map7d1 PE=1 SV=1
565	203	Q9DAW9|CNN3_MOUSE	161.44	21	21	2756.8	5	4	5	Carbamidomethylation; Oxidation (M)	36429	Calponin-3 OS=Mus musculus OX=10090 GN=Cnn3 PE=1 SV=1
265	405	Q8C570|RAE1L_MOUSE	161.32	11	11	14348	3	3	14	Carbamidomethylation; Oxidation (M)	40965	mRNA export factor OS=Mus musculus OX=10090 GN=Rae1 PE=1 SV=1
302	302	P26041|MOES_MOUSE	161.27	8	8	5953.2	4	4	12	Oxidation (M)	67767	Moesin OS=Mus musculus OX=10090 GN=Msn PE=1 SV=3
374	226	Q8VH51|RBM39_MOUSE	160.59	11	11	34046	4	4	9	Oxidation (M); Acetylation (Protein N-term)	59407	RNA-binding protein 39 OS=Mus musculus OX=10090 GN=Rbm39 PE=1 SV=2
272	187	Q925I1|ATAD3_MOUSE	160.29	10	10	6693.5	4	4	13	Carbamidomethylation; Oxidation (M); Deamidation (NQ)	66742	ATPase family AAA domain-containing protein 3 OS=Mus musculus OX=10090 GN=Atad3 PE=1 SV=1
307	245	Q6NWW9|FND3B_MOUSE	159.52	4	4	2173.4	4	4	12	Carbamidomethylation; Deamidation (NQ)	132764	Fibronectin type III domain-containing protein 3B OS=Mus musculus OX=10090 GN=Fndc3b PE=1 SV=1
181	407	Q61696|HS71A_MOUSE	158.85	6	6	621.07	3	1	20		70079	Heat shock 70 kDa protein 1A OS=Mus musculus OX=10090 GN=Hspa1a PE=1 SV=2
181	408	P17879|HS71B_MOUSE	158.85	6	6	621.07	3	1	20		70176	Heat shock 70 kDa protein 1B OS=Mus musculus OX=10090 GN=Hspa1b PE=1 SV=3
352	159	Q9WTM5|RUVB2_MOUSE	158.36	12	12	7901.3	5	5	10	Carbamidomethylation; Oxidation (M)	51113	RuvB-like 2 OS=Mus musculus OX=10090 GN=Ruvbl2 PE=1 SV=3
157	299	Q9CX86|ROA0_MOUSE	157.71	14	14	31162	4	4	24	Carbamidomethylation; Oxidation (M); Acetylation (Protein N-term)	30530	Heterogeneous nuclear ribonucleoprotein A0 OS=Mus musculus OX=10090 GN=Hnrnpa0 PE=1 SV=1
242	333	P60122|RUVB1_MOUSE	157.63	9	9	3370.5	3	3	15		50214	RuvB-like 1 OS=Mus musculus OX=10090 GN=Ruvbl1 PE=1 SV=1
179	290	Q9D4J7|PHF6_MOUSE	157.61	16	16	21720	4	4	20	Carbamidomethylation; Oxidation (M); Deamidation (NQ)	41139	PHD finger protein 6 OS=Mus musculus OX=10090 GN=Phf6 PE=1 SV=1
343	198	Q9QX47|SON_MOUSE	157.28	2	2	4482.1	4	4	10	Carbamidomethylation; Oxidation (M)	265649	Protein SON OS=Mus musculus OX=10090 GN=Son PE=1 SV=2
441	183	Q60865|CAPR1_MOUSE	157.27	12	12	20670	5	5	7	Oxidation (M); Deamidation (NQ)	78169	Caprin-1 OS=Mus musculus OX=10090 GN=Caprin1 PE=1 SV=2
289	323	Q8R323|RFC3_MOUSE	156.47	13	13	7975.7	4	4	13	Carbamidomethylation	40526	Replication factor C subunit 3 OS=Mus musculus OX=10090 GN=Rfc3 PE=1 SV=1
327	228	Q6P542|ABCF1_MOUSE	156.32	7	7	6751.9	4	4	11		94945	ATP-binding cassette sub-family F member 1 OS=Mus musculus OX=10090 GN=Abcf1 PE=1 SV=1
459	347	Q8BIE6|FRM4A_MOUSE	156.26	4	4	787.38	3	3	7		113879	FERM domain-containing protein 4A OS=Mus musculus OX=10090 GN=Frmd4a PE=1 SV=2
292	425	Q922V4|PLRG1_MOUSE	155.87	9	9	13976	3	3	13	Carbamidomethylation; Oxidation (M)	56938	Pleiotropic regulator 1 OS=Mus musculus OX=10090 GN=Plrg1 PE=1 SV=1
387	529	P09103|PDIA1_MOUSE	155.79	6	6	8834.9	2	2	9	Oxidation (M); Deamidation (NQ)	57059	Protein disulfide-isomerase OS=Mus musculus OX=10090 GN=P4hb PE=1 SV=2
506	230	Q68FH0|PKP4_MOUSE	155.79	5	5	1002.5	4	4	6		131551	Plakophilin-4 OS=Mus musculus OX=10090 GN=Pkp4 PE=1 SV=1
401	857	P28033|CEBPB_MOUSE	155.7	9	9	3031.5	2	2	9	Carbamidomethylation	31446	CCAAT/enhancer-binding protein beta OS=Mus musculus OX=10090 GN=Cebpb PE=1 SV=1
418	253	A2RSY6|TRM1L_MOUSE	154.89	9	9	6022.7	3	3	8	Carbamidomethylation	80861	TRMT1-like protein OS=Mus musculus OX=10090 GN=Trmt1l PE=1 SV=1
245	434	Q6IFX2|K1C42_MOUSE	154.62	9	9	14156	3	1	15	Oxidation (M)	50133	Keratin type I cytoskeletal 42 OS=Mus musculus OX=10090 GN=Krt42 PE=1 SV=1
534	196	Q99KW3|TARA_MOUSE	154.43	2	2	1226.6	4	4	5	Carbamidomethylation	223366	TRIO and F-actin-binding protein OS=Mus musculus OX=10090 GN=Triobp PE=1 SV=3
278	185	Q91VR2|ATPG_MOUSE	154.4	17	17	14787	5	5	13	Oxidation (M)	32886	ATP synthase subunit gamma mitochondrial OS=Mus musculus OX=10090 GN=Atp5f1c PE=1 SV=1
335	832	Q9CPT5|NOP16_MOUSE	154.37	14	14	11712	3	3	11	Oxidation (M); Deamidation (NQ)	21139	Nucleolar protein 16 OS=Mus musculus OX=10090 GN=Nop16 PE=1 SV=1
323	260	P17225|PTBP1_MOUSE	154.24	9	9	1766.2	4	3	11	Carbamidomethylation; Oxidation (M); Acetylation (Protein N-term); Deamidation (NQ)	56478	Polypyrimidine tract-binding protein 1 OS=Mus musculus OX=10090 GN=Ptbp1 PE=1 SV=2
373	173	Q60838|DVL2_MOUSE	153.76	7	7	6084.5	4	4	9	Acetylation (Protein N-term)	78861	Segment polarity protein dishevelled homolog DVL-2 OS=Mus musculus OX=10090 GN=Dvl2 PE=1 SV=2
241	300	Q8R0K4|CC137_MOUSE	153.61	19	19	10011	4	4	15	Oxidation (M); Acetylation (Protein N-term)	32918	Coiled-coil domain-containing protein 137 OS=Mus musculus OX=10090 GN=Ccdc137 PE=2 SV=1
177	357	Q9CQT2|RBM7_MOUSE	153.49	12	12	30731	3	3	20	Oxidation (M); Deamidation (NQ)	30148	RNA-binding protein 7 OS=Mus musculus OX=10090 GN=Rbm7 PE=1 SV=1
481	189	Q8BSQ9|PB1_MOUSE	153.47	4	4	3071.1	5	5	6	Carbamidomethylation; Oxidation (M)	187187	Protein polybromo-1 OS=Mus musculus OX=10090 GN=Pbrm1 PE=1 SV=4
378	306	P62259|1433E_MOUSE	153.2	17	17	8291.9	4	4	9	Oxidation (M); Acetylation (Protein N-term)	29174	14-3-3 protein epsilon OS=Mus musculus OX=10090 GN=Ywhae PE=1 SV=1
71	243	Q9Z2K1|K1C16_MOUSE	152.95	11	11	3991	4	2	43	Oxidation (M); Deamidation (NQ)	51606	Keratin type I cytoskeletal 16 OS=Mus musculus OX=10090 GN=Krt16 PE=1 SV=3
460	430	Q9Z2Q2|KNOP1_MOUSE	152.85	8	8	11267	3	3	7	Carbamidomethylation; Oxidation (M)	53846	Lysine-rich nucleolar protein 1 OS=Mus musculus OX=10090 GN=Knop1 PE=1 SV=2
478	158	Q91ZU6|DYST_MOUSE	152.72	1	1	18018	4	4	6		834234	Dystonin OS=Mus musculus OX=10090 GN=Dst PE=1 SV=2
240	287	P52293|IMA1_MOUSE	152.57	12	12	1484.2	4	4	15	Acetylation (Protein N-term)	57928	Importin subunit alpha-1 OS=Mus musculus OX=10090 GN=Kpna2 PE=1 SV=2
78	606	P84099|RL19_MOUSE	152.57	13	13	265920	2	2	40	Deamidation (NQ)	23466	60S ribosomal protein L19 OS=Mus musculus OX=10090 GN=Rpl19 PE=1 SV=1
87	523	P14869|RLA0_MOUSE	152.1	11	11	246350	2	2	36	Carbamidomethylation; Deamidation (NQ)	34216	60S acidic ribosomal protein P0 OS=Mus musculus OX=10090 GN=Rplp0 PE=1 SV=3
165	428	P47911|RL6_MOUSE	152.02	10	10	182020	3	3	22	Deamidation (NQ)	33510	60S ribosomal protein L6 OS=Mus musculus OX=10090 GN=Rpl6 PE=1 SV=3
252	339	P47753|CAZA1_MOUSE	151.98	20	20	77574	3	3	14	Oxidation (M)	32940	F-actin-capping protein subunit alpha-1 OS=Mus musculus OX=10090 GN=Capza1 PE=1 SV=4
284	564	P62830|RL23_MOUSE	151.46	16	16	65906	2	2	13	Carbamidomethylation; Oxidation (M)	14865	60S ribosomal protein L23 OS=Mus musculus OX=10090 GN=Rpl23 PE=1 SV=1
381	180	Q921U8|SMTN_MOUSE	151.33	6	6	1690.3	5	5	9	Acetylation (Protein N-term)	100289	Smoothelin OS=Mus musculus OX=10090 GN=Smtn PE=1 SV=2
207	225	Q99NH0|ANR17_MOUSE	151.22	2	2	1747.7	4	4	18	Carbamidomethylation	274211	Ankyrin repeat domain-containing protein 17 OS=Mus musculus OX=10090 GN=Ankrd17 PE=1 SV=2
391	373	Q3UJB9|EDC4_MOUSE	150.68	3	3	3794.8	3	3	9	Carbamidomethylation; Acetylation (Protein N-term)	152483	Enhancer of mRNA-decapping protein 4 OS=Mus musculus OX=10090 GN=Edc4 PE=1 SV=2
172	371	P10126|EF1A1_MOUSE	150.65	6	6	65581	3	3	21	Oxidation (M)	50114	Elongation factor 1-alpha 1 OS=Mus musculus OX=10090 GN=Eef1a1 PE=1 SV=3
277	931	P17095|HMGA1_MOUSE	150.4	28	28	19717	3	3	13		11614	High mobility group protein HMG-I/HMG-Y OS=Mus musculus OX=10090 GN=Hmga1 PE=1 SV=4
573	612	P60843|IF4A1_MOUSE	150.3	6	6	1883.1	2	2	5		46154	Eukaryotic initiation factor 4A-I OS=Mus musculus OX=10090 GN=Eif4a1 PE=1 SV=1
155	445	Q60749|KHDR1_MOUSE	149.73	7	7	150110	3	3	24	Oxidation (M); Deamidation (NQ)	48371	KH domain-containing RNA-binding signal transduction-associated protein 1 OS=Mus musculus OX=10090 GN=Khdrbs1 PE=1 SV=2
382	227	Q6ZPF4|FMNL3_MOUSE	149.34	4	4	3153.2	4	4	9	Carbamidomethylation	117169	Formin-like protein 3 OS=Mus musculus OX=10090 GN=Fmnl3 PE=1 SV=2
490	257	Q80VY9|DHX33_MOUSE	149.31	6	6	2420.5	3	3	6		78347	ATP-dependent RNA helicase DHX33 OS=Mus musculus OX=10090 GN=Dhx33 PE=1 SV=1
112	585	P35980|RL18_MOUSE	149.16	13	13	469810	2	2	30	Deamidation (NQ)	21645	60S ribosomal protein L18 OS=Mus musculus OX=10090 GN=Rpl18 PE=1 SV=3
322	344	P14206|RSSA_MOUSE	149.04	11	11	18866	3	3	11	Carbamidomethylation	32838	40S ribosomal protein SA OS=Mus musculus OX=10090 GN=Rpsa PE=1 SV=4
182	432	Q8BP67|RL24_MOUSE	148.37	20	20	91721	3	3	20	Carbamidomethylation; Oxidation (M)	17779	60S ribosomal protein L24 OS=Mus musculus OX=10090 GN=Rpl24 PE=1 SV=2
449	264	Q9D0R4|DDX56_MOUSE	148.24	6	6	6905.1	3	3	7		61212	Probable ATP-dependent RNA helicase DDX56 OS=Mus musculus OX=10090 GN=Ddx56 PE=2 SV=1
285	387	E9Q5C9|NOLC1_MOUSE	147.81	6	6	2190.4	3	3	13		73698	Nucleolar and coiled-body phosphoprotein 1 OS=Mus musculus OX=10090 GN=Nolc1 PE=1 SV=1
282	338	Q8BMS1|ECHA_MOUSE	147.31	5	5	1967.4	3	3	13		82670	Trifunctional enzyme subunit alpha mitochondrial OS=Mus musculus OX=10090 GN=Hadha PE=1 SV=1
36	474	Q9CPR4|RL17_MOUSE	147.28	10	10	266180	2	2	67	Deamidation (NQ)	21423	60S ribosomal protein L17 OS=Mus musculus OX=10090 GN=Rpl17 PE=1 SV=3
347	143	Q7TPW1|NEXN_MOUSE	146.7	8	8	17120	5	5	10	Oxidation (M)	72108	Nexilin OS=Mus musculus OX=10090 GN=Nexn PE=1 SV=3
405	321	P11103|PARP1_MOUSE	145.57	4	4	5009.6	3	3	8	Carbamidomethylation; Oxidation (M)	113100	Poly [ADP-ribose] polymerase 1 OS=Mus musculus OX=10090 GN=Parp1 PE=1 SV=3
137	305	Q9CZX8|RS19_MOUSE	145.52	27	27	242470	4	4	26	Oxidation (M); Acetylation (Protein N-term); Deamidation (NQ)	16085	40S ribosomal protein S19 OS=Mus musculus OX=10090 GN=Rps19 PE=1 SV=3
448	252	Q05CL8|LARP7_MOUSE	145.43	6	6	4914.8	3	3	6		64802	La-related protein 7 OS=Mus musculus OX=10090 GN=Larp7 PE=1 SV=2
226	263	Q9EQ61|PESC_MOUSE	145.36	6	6	5290.3	3	3	16	Oxidation (M)	67796	Pescadillo homolog OS=Mus musculus OX=10090 GN=Pes1 PE=1 SV=1
473	317	Q9ERH4|NUSAP_MOUSE	145.33	10	10	1882.2	4	4	7	Carbamidomethylation; Oxidation (M)	48573	Nucleolar and spindle-associated protein 1 OS=Mus musculus OX=10090 GN=Nusap1 PE=1 SV=1
354	231	Q9WU78|PDC6I_MOUSE	145.25	6	6	2187.9	4	4	10	Carbamidomethylation; Oxidation (M)	96024	Programmed cell death 6-interacting protein OS=Mus musculus OX=10090 GN=Pdcd6ip PE=1 SV=3
474	402	P63038|CH60_MOUSE	145.05	9	9	2367.4	3	3	7		60956	60 kDa heat shock protein mitochondrial OS=Mus musculus OX=10090 GN=Hspd1 PE=1 SV=1
404	315	Q08093|CNN2_MOUSE	144.75	16	16	3798	4	3	8	Carbamidomethylation; Oxidation (M); Deamidation (NQ)	33156	Calponin-2 OS=Mus musculus OX=10090 GN=Cnn2 PE=1 SV=1
237	446	P14148|RL7_MOUSE	144.74	10	10	140590	3	3	15	Acetylation (Protein N-term)	31420	60S ribosomal protein L7 OS=Mus musculus OX=10090 GN=Rpl7 PE=1 SV=2
338	397	A2BE28|LAS1L_MOUSE	144.46	6	6	2278.2	3	3	11		89414	Ribosomal biogenesis protein LAS1L OS=Mus musculus OX=10090 GN=Las1l PE=1 SV=1
228	281	P08775|RPB1_MOUSE	144.41	4	4	1065.8	4	4	16		217174	DNA-directed RNA polymerase II subunit RPB1 OS=Mus musculus OX=10090 GN=Polr2a PE=1 SV=3
421	514	Q8VEJ4|NLE1_MOUSE	144.28	7	7	2269.2	2	2	8	Acetylation (Protein N-term)	53134	Notchless protein homolog 1 OS=Mus musculus OX=10090 GN=Nle1 PE=1 SV=4
192	426	Q9CXL3|CG050_MOUSE	143.99	18	18	9184.1	3	3	19		22168	Uncharacterized protein C7orf50 homolog OS=Mus musculus OX=10090 PE=1 SV=3
337	316	Q8BJH1|ZC21A_MOUSE	143.93	13	13	7527.1	4	4	11	Carbamidomethylation	35152	Zinc finger C2HC domain-containing protein 1A OS=Mus musculus OX=10090 GN=Zc2hc1a PE=1 SV=1
597	190	P26231|CTNA1_MOUSE	143.54	5	5	6542.2	4	4	4	Acetylation (Protein N-term)	100106	Catenin alpha-1 OS=Mus musculus OX=10090 GN=Ctnna1 PE=1 SV=1
198	365	Q61937|NPM_MOUSE	143.43	12	12	90682	4	4	18	Deamidation (NQ)	32560	Nucleophosmin OS=Mus musculus OX=10090 GN=Npm1 PE=1 SV=1
499	334	Q9WV92|E41L3_MOUSE	143.35	4	4	2530.5	3	3	6		103338	Band 4.1-like protein 3 OS=Mus musculus OX=10090 GN=Epb41l3 PE=1 SV=1
318	146	P97386|DNLI3_MOUSE	143.05	5	5	3707.7	4	4	11		113072	DNA ligase 3 OS=Mus musculus OX=10090 GN=Lig3 PE=1 SV=2
532	165	P09405|NUCL_MOUSE	142.88	6	6	13563	4	4	5		76723	Nucleolin OS=Mus musculus OX=10090 GN=Ncl PE=1 SV=2
389	291	Q80XP8|FA76B_MOUSE	142.66	14	14	8507.9	4	4	9	Carbamidomethylation; Acetylation (Protein N-term)	38556	Protein FAM76B OS=Mus musculus OX=10090 GN=Fam76b PE=1 SV=1
300	326	P58468|F207A_MOUSE	142.36	20	20	14004	4	4	12		24814	Protein FAM207A OS=Mus musculus OX=10090 GN=Fam207a PE=1 SV=1
634	816	Q9WV32|ARC1B_MOUSE	142.31	8	8	5832.2	2	2	4		41064	Actin-related protein 2/3 complex subunit 1B OS=Mus musculus OX=10090 GN=Arpc1b PE=1 SV=4
451	545	Q8CB77|ELOA1_MOUSE	142.03	3	3	16272	2	2	7	Acetylation (Protein N-term)	87161	Elongin-A OS=Mus musculus OX=10090 GN=Eloa PE=1 SV=3
512	409	Q6ZQL4|WDR43_MOUSE	141.94	6	6	6313.5	3	3	6	Carbamidomethylation	75381	WD repeat-containing protein 43 OS=Mus musculus OX=10090 GN=Wdr43 PE=1 SV=2
336	314	Q9WTX2|PRKRA_MOUSE	141.9	14	14	43598	4	4	11	Carbamidomethylation	34371	Interferon-inducible double-stranded RNA-dependent protein kinase activator A OS=Mus musculus OX=10090 GN=Prkra PE=1 SV=1
410	304	Q9WVK4|EHD1_MOUSE	141.78	9	9	2053.2	4	4	8	Oxidation (M)	60603	EH domain-containing protein 1 OS=Mus musculus OX=10090 GN=Ehd1 PE=1 SV=1
613	222	Q91WQ3|SYYC_MOUSE	141.59	9	9	1482.5	4	4	4	Carbamidomethylation	59105	Tyrosine--tRNA ligase cytoplasmic OS=Mus musculus OX=10090 GN=Yars1 PE=1 SV=3
47	840	Q9JII5|DAZP1_MOUSE	141.26	6	6	97484	2	2	55	Oxidation (M); Acetylation (Protein N-term); Deamidation (NQ)	43214	DAZ-associated protein 1 OS=Mus musculus OX=10090 GN=Dazap1 PE=1 SV=2
370	132	Q8K4P0|WDR33_MOUSE	141.15	5	5	6670.5	5	5	9	Carbamidomethylation	145267	pre-mRNA 3' end processing protein WDR33 OS=Mus musculus OX=10090 GN=Wdr33 PE=1 SV=1
372	379	P35550|FBRL_MOUSE	140.75	9	9	23616	2	2	9	Carbamidomethylation	34307	rRNA 2'-O-methyltransferase fibrillarin OS=Mus musculus OX=10090 GN=Fbl PE=1 SV=2
442	181	Q80U58|PUM2_MOUSE	140.74	4	4	1480.6	4	2	7	Oxidation (M); Acetylation (Protein N-term)	114314	Pumilio homolog 2 OS=Mus musculus OX=10090 GN=Pum2 PE=1 SV=2
525	472	Q9Z1Z2|STRAP_MOUSE	140.04	14	14	2029	3	3	6		38442	Serine-threonine kinase receptor-associated protein OS=Mus musculus OX=10090 GN=Strap PE=1 SV=2
476	833	Q9CQF0|RM11_MOUSE	140.01	13	13	8420	3	3	7		20680	39S ribosomal protein L11 mitochondrial OS=Mus musculus OX=10090 GN=Mrpl11 PE=1 SV=1
523	448	Q91VH2|SNX9_MOUSE	139.84	6	6	9665.9	3	3	6		66546	Sorting nexin-9 OS=Mus musculus OX=10090 GN=Snx9 PE=1 SV=1
324	261	Q8BTV2|CPSF7_MOUSE	139.81	10	10	5647	4	4	11		52011	Cleavage and polyadenylation specificity factor subunit 7 OS=Mus musculus OX=10090 GN=Cpsf7 PE=1 SV=2
359	289	Q61792|LASP1_MOUSE	139.44	19	19	3546.7	4	4	10	Oxidation (M)	29994	LIM and SH3 domain protein 1 OS=Mus musculus OX=10090 GN=Lasp1 PE=1 SV=1
215	214	Q6PFD9|NUP98_MOUSE	139.05	3	3	23222	5	5	17	Oxidation (M); Deamidation (NQ)	197239	Nuclear pore complex protein Nup98-Nup96 OS=Mus musculus OX=10090 GN=Nup98 PE=1 SV=2
132	864	O55142|RL35A_MOUSE	138.93	19	19	137650	2	2	27	Deamidation (NQ)	12554	60S ribosomal protein L35a OS=Mus musculus OX=10090 GN=Rpl35a PE=1 SV=2
344	298	Q8R1G6|PDLI2_MOUSE	138.66	18	18	10831	4	4	10	Deamidation (NQ)	37703	PDZ and LIM domain protein 2 OS=Mus musculus OX=10090 GN=Pdlim2 PE=1 SV=1
432	730	Q9DBG9|TX1B3_MOUSE	138.45	25	25	551.43	2	2	8	Acetylation (Protein N-term)	13723	Tax1-binding protein 3 OS=Mus musculus OX=10090 GN=Tax1bp3 PE=1 SV=1
560	824	Q9R0B7|ZN346_MOUSE	138.16	10	10	3029.4	2	2	5	Carbamidomethylation; Oxidation (M)	32698	Zinc finger protein 346 OS=Mus musculus OX=10090 GN=Znf346 PE=1 SV=1
332	356	P52912|TIA1_MOUSE	137.91	8	8	2069.7	3	1	11		42800	Nucleolysin TIA-1 OS=Mus musculus OX=10090 GN=Tia1 PE=1 SV=1
333	378	P70372|ELAV1_MOUSE	137.83	12	12	26871	3	3	11	Carbamidomethylation; Acetylation (Protein N-term); Deamidation (NQ)	36169	ELAV-like protein 1 OS=Mus musculus OX=10090 GN=Elavl1 PE=1 SV=2
660	906	P53996|CNBP_MOUSE	137.51	12	12	17693	2	2	4	Carbamidomethylation; Deamidation (NQ)	19592	Cellular nucleic acid-binding protein OS=Mus musculus OX=10090 GN=Cnbp PE=1 SV=2
320	192	P08553|NFM_MOUSE	136.99	6	6	12814	4	3	11	Acetylation (Protein N-term); Deamidation (NQ)	95916	Neurofilament medium polypeptide OS=Mus musculus OX=10090 GN=Nefm PE=1 SV=4
748	835	Q9DBD5|PELP1_MOUSE	136.63	4	4	3354.5	2	2	3	Carbamidomethylation; Acetylation (Protein N-term)	118069	Proline- glutamic acid- and leucine-rich protein 1 OS=Mus musculus OX=10090 GN=Pelp1 PE=1 SV=2
168	544	Q9CY57|CHTOP_MOUSE	136.63	10	10	32475	2	2	22	Oxidation (M)	26585	Chromatin target of PRMT1 protein OS=Mus musculus OX=10090 GN=Chtop PE=1 SV=2
521	423	Q3UFY8|TM10C_MOUSE	136.24	12	12	5651.8	3	3	6		48386	tRNA methyltransferase 10 homolog C OS=Mus musculus OX=10090 GN=Trmt10c PE=1 SV=2
507	359	Q69Z99|ZN512_MOUSE	136.24	8	8	4276.7	3	3	6	Carbamidomethylation; Deamidation (NQ)	63908	Zinc finger protein 512 OS=Mus musculus OX=10090 GN=Znf512 PE=2 SV=2
246	809	Q9CQW9|IFM3_MOUSE	136.23	28	28	6183.2	2	2	15	Oxidation (M); Acetylation (Protein N-term)	14954	Interferon-induced transmembrane protein 3 OS=Mus musculus OX=10090 GN=Ifitm3 PE=1 SV=1
204	389	Q9Z0H1|WDR46_MOUSE	136.22	5	5	5572.1	3	3	18	Oxidation (M); Acetylation (Protein N-term)	69048	WD repeat-containing protein 46 OS=Mus musculus OX=10090 GN=Wdr46 PE=2 SV=1
427	350	Q8QZY1|EIF3L_MOUSE	135.98	8	8	5125.6	3	3	8	Deamidation (NQ)	66613	Eukaryotic translation initiation factor 3 subunit L OS=Mus musculus OX=10090 GN=Eif3l PE=1 SV=1
522	435	Q80U78|PUM1_MOUSE	135.93	3	3	905.31	3	1	6		126619	Pumilio homolog 1 OS=Mus musculus OX=10090 GN=Pum1 PE=1 SV=2
458	325	Q8BX10|PGAM5_MOUSE	135.77	15	15	20949	4	4	7	Oxidation (M)	31994	Serine/threonine-protein phosphatase PGAM5 mitochondrial OS=Mus musculus OX=10090 GN=Pgam5 PE=1 SV=1
457	311	Q9DB77|QCR2_MOUSE	135.42	13	13	3654.4	4	4	7	Carbamidomethylation	48235	Cytochrome b-c1 complex subunit 2 mitochondrial OS=Mus musculus OX=10090 GN=Uqcrc2 PE=1 SV=1
416	121	O08810|U5S1_MOUSE	135.14	8	8	4253.4	7	7	8	Carbamidomethylation; Oxidation (M)	109361	116 kDa U5 small nuclear ribonucleoprotein component OS=Mus musculus OX=10090 GN=Eftud2 PE=1 SV=1
629	598	Q91V61|SFXN3_MOUSE	135.1	9	9	973.43	2	2	4	Acetylation (Protein N-term)	35406	Sideroflexin-3 OS=Mus musculus OX=10090 GN=Sfxn3 PE=1 SV=1
280	880	Q9CZM2|RL15_MOUSE	134.76	11	11	141100	2	2	13	Deamidation (NQ)	24146	60S ribosomal protein L15 OS=Mus musculus OX=10090 GN=Rpl15 PE=1 SV=4
394	337	Q8R2U2|NEPRO_MOUSE	134.32	7	7	11049	3	3	9	Carbamidomethylation	63394	Nucleolus and neural progenitor protein OS=Mus musculus OX=10090 GN=Nepro PE=2 SV=1
377	238	O88379|BAZ1A_MOUSE	134.07	2	2	1784	3	3	9	Carbamidomethylation	178458	Bromodomain adjacent to zinc finger domain protein 1A OS=Mus musculus OX=10090 GN=Baz1a PE=1 SV=3
306	188	Q6PAQ4|REXO4_MOUSE	134.04	13	13	14494	5	5	12		47599	RNA exonuclease 4 OS=Mus musculus OX=10090 GN=Rexo4 PE=2 SV=2
426	246	O70551|SRPK1_MOUSE	133.89	9	9	10549	4	4	8		73089	SRSF protein kinase 1 OS=Mus musculus OX=10090 GN=Srpk1 PE=1 SV=2
308	467	Q8K4L0|DDX54_MOUSE	133.77	5	5	1033.6	3	3	12	Carbamidomethylation	97748	ATP-dependent RNA helicase DDX54 OS=Mus musculus OX=10090 GN=Ddx54 PE=1 SV=1
488	219	Q8VE92|RBM4B_MOUSE	133.67	13	13	2307.6	4	1	6	Carbamidomethylation	39991	RNA-binding protein 4B OS=Mus musculus OX=10090 GN=Rbm4b PE=1 SV=1
304	565	Q91XV3|BASP1_MOUSE	133.24	20	20	472.46	2	2	12	Deamidation (NQ)	22087	Brain acid soluble protein 1 OS=Mus musculus OX=10090 GN=Basp1 PE=1 SV=3
384	353	P97820|M4K4_MOUSE	133.14	4	4	1677.1	3	3	9		140602	Mitogen-activated protein kinase kinase kinase kinase 4 OS=Mus musculus OX=10090 GN=Map4k4 PE=1 SV=1
131	366	Q6PDQ2|CHD4_MOUSE	133.14	2	2	829.59	3	3	27		217749	Chromodomain-helicase-DNA-binding protein 4 OS=Mus musculus OX=10090 GN=Chd4 PE=1 SV=1
546	364	Q8R3N1|NOP14_MOUSE	133.07	4	4	2950.2	3	3	5	Oxidation (M)	98769	Nucleolar protein 14 OS=Mus musculus OX=10090 GN=Nop14 PE=1 SV=2
264	488	Q9CR57|RL14_MOUSE	133.04	10	10	541450	2	2	14	Carbamidomethylation	23564	60S ribosomal protein L14 OS=Mus musculus OX=10090 GN=Rpl14 PE=1 SV=3
436	821	P84089|ERH_MOUSE	132.84	27	27	3983.9	2	2	8	Carbamidomethylation	12259	Enhancer of rudimentary homolog OS=Mus musculus OX=10090 GN=Erh PE=1 SV=1
514	811	P99027|RLA2_MOUSE	132.52	40	40	32788	2	2	6		11651	60S acidic ribosomal protein P2 OS=Mus musculus OX=10090 GN=Rplp2 PE=1 SV=3
419	449	P62141|PP1B_MOUSE	132.41	10	10	19928	3	2	8	Carbamidomethylation; Oxidation (M); Acetylation (Protein N-term)	37187	Serine/threonine-protein phosphatase PP1-beta catalytic subunit OS=Mus musculus OX=10090 GN=Ppp1cb PE=1 SV=3
397	401	Q921I9|EXOS4_MOUSE	132.12	20	20	4419.4	3	3	9	Carbamidomethylation; Acetylation (Protein N-term)	26250	Exosome complex component RRP41 OS=Mus musculus OX=10090 GN=Exosc4 PE=1 SV=3
547	413	Q61753|SERA_MOUSE	131.8	7	7	13099	3	3	5		56586	D-3-phosphoglycerate dehydrogenase OS=Mus musculus OX=10090 GN=Phgdh PE=1 SV=3
360	439	Q9WUK4|RFC2_MOUSE	131.27	11	11	7265.7	3	3	10		38725	Replication factor C subunit 2 OS=Mus musculus OX=10090 GN=Rfc2 PE=1 SV=1
249	149	E9QAT4|SC16A_MOUSE	131.25	3	3	1702	4	4	14		254200	Protein transport protein Sec16A OS=Mus musculus OX=10090 GN=Sec16a PE=1 SV=1
494	526	Q571H0|NPA1P_MOUSE	131.17	1	1	506.36	2	2	6		254611	Nucleolar pre-ribosomal-associated protein 1 OS=Mus musculus OX=10090 GN=Urb1 PE=1 SV=2
701	536	Q62465|VAT1_MOUSE	131.17	8	8	3453.2	2	2	3	Oxidation (M)	43097	Synaptic vesicle membrane protein VAT-1 homolog OS=Mus musculus OX=10090 GN=Vat1 PE=1 SV=3
263	485	Q8BP71|RFOX2_MOUSE	131.05	9	9	3997.9	2	2	14	Acetylation (Protein N-term)	47330	RNA binding protein fox-1 homolog 2 OS=Mus musculus OX=10090 GN=Rbfox2 PE=1 SV=2
339	813	Q99JF8|PSIP1_MOUSE	130.96	6	6	2741.4	2	2	11	Oxidation (M)	59697	PC4 and SFRS1-interacting protein OS=Mus musculus OX=10090 GN=Psip1 PE=1 SV=1
400	830	P61161|ARP2_MOUSE	130.77	6	6	3655.1	2	2	9	Carbamidomethylation; Oxidation (M); Deamidation (NQ)	44761	Actin-related protein 2 OS=Mus musculus OX=10090 GN=Actr2 PE=1 SV=1
583	442	Q9QXK7|CPSF3_MOUSE	130.28	5	5	5346.2	3	3	5	Carbamidomethylation; Deamidation (NQ)	77505	Cleavage and polyadenylation specificity factor subunit 3 OS=Mus musculus OX=10090 GN=Cpsf3 PE=1 SV=2
585	848	Q3U9G9|LBR_MOUSE	130.22	4	4	3659.9	2	2	5		71440	Delta(14)-sterol reductase LBR OS=Mus musculus OX=10090 GN=Lbr PE=1 SV=2
741	444	Q9D1M0|SEC13_MOUSE	129.29	11	11	15037	3	3	3	Carbamidomethylation; Deamidation (NQ)	35566	Protein SEC13 homolog OS=Mus musculus OX=10090 GN=Sec13 PE=1 SV=3
303	443	Q76KJ5|RPA34_MOUSE	128.98	10	10	7200.1	3	3	12	Carbamidomethylation; Oxidation (M)	43082	DNA-directed RNA polymerase I subunit RPA34 OS=Mus musculus OX=10090 GN=Cd3eap PE=1 SV=2
501	433	O70433|FHL2_MOUSE	128.66	14	14	3233.8	3	3	6	Carbamidomethylation; Deamidation (NQ)	32073	Four and a half LIM domains protein 2 OS=Mus musculus OX=10090 GN=Fhl2 PE=1 SV=1
567	360	P97496|SMRC1_MOUSE	128.31	5	5	11219	3	2	5	Carbamidomethylation; Oxidation (M); Acetylation (Protein N-term)	122890	SWI/SNF complex subunit SMARCC1 OS=Mus musculus OX=10090 GN=Smarcc1 PE=1 SV=2
543	220	Q8C7Q4|RBM4_MOUSE	127.98	13	13	629.6	4	1	5	Carbamidomethylation	40045	RNA-binding protein 4 OS=Mus musculus OX=10090 GN=Rbm4 PE=1 SV=1
266	825	P56480|ATPB_MOUSE	127.23	5	5	8747.4	2	2	14	Oxidation (M)	56301	ATP synthase subunit beta mitochondrial OS=Mus musculus OX=10090 GN=Atp5f1b PE=1 SV=2
697	354	Q91VI7|RINI_MOUSE	127.2	7	7	5179	3	3	3	Carbamidomethylation	49817	Ribonuclease inhibitor OS=Mus musculus OX=10090 GN=Rnh1 PE=1 SV=1
544	265	Q9Z1Q5|CLIC1_MOUSE	126.99	18	18	8336.9	4	4	5	Acetylation (Protein N-term)	27013	Chloride intracellular channel protein 1 OS=Mus musculus OX=10090 GN=Clic1 PE=1 SV=3
717	460	P08249|MDHM_MOUSE	126.59	12	12	829.29	3	3	3	Carbamidomethylation; Oxidation (M)	35611	Malate dehydrogenase mitochondrial OS=Mus musculus OX=10090 GN=Mdh2 PE=1 SV=3
325	329	Q8BJS4|SUN2_MOUSE	126.56	5	5	1957.7	3	3	11	Oxidation (M)	81605	SUN domain-containing protein 2 OS=Mus musculus OX=10090 GN=Sun2 PE=1 SV=3
797	491	Q61553|FSCN1_MOUSE	126.44	5	5	46646	2	2	2	Carbamidomethylation	54508	Fascin OS=Mus musculus OX=10090 GN=Fscn1 PE=1 SV=4
658	843	P70333|HNRH2_MOUSE	126.38	5	5	11015	2	2	4	Carbamidomethylation; Oxidation (M)	49280	Heterogeneous nuclear ribonucleoprotein H2 OS=Mus musculus OX=10090 GN=Hnrnph2 PE=1 SV=1
429	519	Q8BG81|PDIP3_MOUSE	126.18	7	7	3078.3	2	2	8		46133	Polymerase delta-interacting protein 3 OS=Mus musculus OX=10090 GN=Poldip3 PE=1 SV=1
376	237	Q8CCP0|NEMF_MOUSE	126.06	4	4	2005.6	4	4	9	Carbamidomethylation	121188	Nuclear export mediator factor Nemf OS=Mus musculus OX=10090 GN=Nemf PE=1 SV=2
396	1385	P97461|RS5_MOUSE	125.81	9	9	30084	2	2	9	Acetylation (Protein N-term)	22889	40S ribosomal protein S5 OS=Mus musculus OX=10090 GN=Rps5 PE=1 SV=3
345	447	Q8BK67|RCC2_MOUSE	125.72	7	7	414190	3	3	10	Carbamidomethylation; Deamidation (NQ)	55983	Protein RCC2 OS=Mus musculus OX=10090 GN=Rcc2 PE=1 SV=1
422	530	P18760|COF1_MOUSE	125.38	14	14	26335	2	1	8	Acetylation (Protein N-term)	18560	Cofilin-1 OS=Mus musculus OX=10090 GN=Cfl1 PE=1 SV=3
438	846	P62911|RL32_MOUSE	125.33	18	18	16141	2	2	8	Carbamidomethylation; Oxidation (M)	15860	60S ribosomal protein L32 OS=Mus musculus OX=10090 GN=Rpl32 PE=1 SV=2
493	372	Q64511|TOP2B_MOUSE	125.19	2	2	3850.8	3	3	6		181908	DNA topoisomerase 2-beta OS=Mus musculus OX=10090 GN=Top2b PE=1 SV=2
408	258	Q9WTU0|PHF2_MOUSE	125.16	3	3	9046.9	3	3	8	Carbamidomethylation; Acetylation (Protein N-term)	120814	Lysine-specific demethylase PHF2 OS=Mus musculus OX=10090 GN=Phf2 PE=1 SV=2
515	854	Q9WTY4|AQP5_MOUSE	124.72	10	10	6526.7	2	2	6	Oxidation (M)	28274	Aquaporin-5 OS=Mus musculus OX=10090 GN=Aqp5 PE=1 SV=1
369	242	Q91WJ8|FUBP1_MOUSE	124.54	8	8	954.99	4	3	9	Carbamidomethylation	68540	Far upstream element-binding protein 1 OS=Mus musculus OX=10090 GN=Fubp1 PE=1 SV=1
746	829	Q61164|CTCF_MOUSE	124.42	4	4	1014.6	2	2	3	Carbamidomethylation	83746	Transcriptional repressor CTCF OS=Mus musculus OX=10090 GN=Ctcf PE=1 SV=2
313	861	Q8BGZ2|F168A_MOUSE	123.92	11	11	7035.5	2	2	12	Oxidation (M); Acetylation (Protein N-term); Deamidation (NQ)	26184	Protein FAM168A OS=Mus musculus OX=10090 GN=Fam168a PE=1 SV=1
209	876	P47964|RL36_MOUSE	123.63	18	18	188810	2	2	18	Carbamidomethylation; Oxidation (M)	12216	60S ribosomal protein L36 OS=Mus musculus OX=10090 GN=Rpl36 PE=1 SV=2
437	823	P62962|PROF1_MOUSE	123.45	21	21	8491.6	2	2	8	Oxidation (M)	14957	Profilin-1 OS=Mus musculus OX=10090 GN=Pfn1 PE=1 SV=2
291	414	O89086|RBM3_MOUSE	123.22	22	22	6931.1	3	3	13	Deamidation (NQ)	16605	RNA-binding protein 3 OS=Mus musculus OX=10090 GN=Rbm3 PE=1 SV=1
557	538	Q9EP97|SENP3_MOUSE	122.59	6	6	3275.1	2	2	5		64403	Sentrin-specific protease 3 OS=Mus musculus OX=10090 GN=Senp3 PE=1 SV=1
528	860	P52432|RPAC1_MOUSE	122.4	8	8	1095.1	2	2	6	Acetylation (Protein N-term)	39107	DNA-directed RNA polymerases I and III subunit RPAC1 OS=Mus musculus OX=10090 GN=Polr1c PE=1 SV=3
423	600	Q9D0B0|SRSF9_MOUSE	122.3	10	10	8279.8	2	2	8	Carbamidomethylation	25661	Serine/arginine-rich splicing factor 9 OS=Mus musculus OX=10090 GN=Srsf9 PE=1 SV=1
584	812	Q99PT1|GDIR1_MOUSE	122.22	15	15	4162.5	2	2	5	Oxidation (M)	23407	Rho GDP-dissociation inhibitor 1 OS=Mus musculus OX=10090 GN=Arhgdia PE=1 SV=3
587	930	Q8CIL4|CA131_MOUSE	121.92	10	10	1104	2	2	5		31344	Uncharacterized protein C1orf131 homolog OS=Mus musculus OX=10090 PE=1 SV=1
329	197	P61222|ABCE1_MOUSE	121.81	10	10	4396	5	5	11	Carbamidomethylation; Deamidation (NQ)	67314	ATP-binding cassette sub-family E member 1 OS=Mus musculus OX=10090 GN=Abce1 PE=1 SV=1
642	1051	Q62093|SRSF2_MOUSE	121.71	8	8	1376.8	1	1	4		25476	Serine/arginine-rich splicing factor 2 OS=Mus musculus OX=10090 GN=Srsf2 PE=1 SV=4
810	506	Q9D0I9|SYRC_MOUSE	121.68	4	4	1571.2	2	2	2	Carbamidomethylation; Acetylation (Protein N-term)	75674	Arginine--tRNA ligase cytoplasmic OS=Mus musculus OX=10090 GN=Rars1 PE=1 SV=2
635	817	Q60793|KLF4_MOUSE	121.56	8	8	4885.8	2	2	4		51880	Krueppel-like factor 4 OS=Mus musculus OX=10090 GN=Klf4 PE=1 SV=3
526	841	Q9CX11|UTP23_MOUSE	121.48	9	9	1268.4	2	2	6	Carbamidomethylation; Oxidation (M)	28380	rRNA-processing protein UTP23 homolog OS=Mus musculus OX=10090 GN=Utp23 PE=2 SV=1
456	244	Q68FD5|CLH1_MOUSE	121.38	3	3	1546.2	4	4	7	Carbamidomethylation; Deamidation (NQ)	191555	Clathrin heavy chain 1 OS=Mus musculus OX=10090 GN=Cltc PE=1 SV=3
636	818	P05627|JUN_MOUSE	121.1	9	9	1894	2	2	4		35944	Transcription factor AP-1 OS=Mus musculus OX=10090 GN=Jun PE=1 SV=3
568	375	Q80T69|RSBN1_MOUSE	121.07	5	5	3938.1	3	3	5	Carbamidomethylation	89251	Lysine-specific demethylase 9 OS=Mus musculus OX=10090 GN=Rsbn1 PE=1 SV=3
475	820	Q9D937|CK098_MOUSE	120.99	23	23	9253.2	2	2	7		14099	Uncharacterized protein C11orf98 homolog OS=Mus musculus OX=10090 PE=1 SV=1
84	877	P83882|RL36A_MOUSE	120.82	18	18	141380	2	2	37	Carbamidomethylation; Deamidation (NQ)	12441	60S ribosomal protein L36a OS=Mus musculus OX=10090 GN=Rpl36a PE=3 SV=2
375	216	G3X9J0|SI1L3_MOUSE	120.39	5	5	2186.1	5	5	9	Carbamidomethylation; Deamidation (NQ)	195062	Signal-induced proliferation-associated 1-like protein 3 OS=Mus musculus OX=10090 GN=Sipa1l3 PE=1 SV=1
383	310	Q9DB42|ZN593_MOUSE	120.37	40	40	5030.8	4	4	9	Oxidation (M)	15147	Zinc finger protein 593 OS=Mus musculus OX=10090 GN=Znf593 PE=1 SV=2
356	580	P62281|RS11_MOUSE	120.08	13	13	51914	2	2	10	Carbamidomethylation	18431	40S ribosomal protein S11 OS=Mus musculus OX=10090 GN=Rps11 PE=1 SV=3
386	457	Q8BQZ5|CPSF4_MOUSE	120.04	23	23	1891	3	3	9	Carbamidomethylation; Oxidation (M); Deamidation (NQ)	23653	Cleavage and polyadenylation specificity factor subunit 4 OS=Mus musculus OX=10090 GN=Cpsf4 PE=2 SV=1
390	318	B2RRE7|OTUD4_MOUSE	119.09	5	5	5708.4	4	4	9	Carbamidomethylation; Deamidation (NQ)	123055	OTU domain-containing protein 4 OS=Mus musculus OX=10090 GN=Otud4 PE=1 SV=1
274	471	P32067|LA_MOUSE	118.96	7	7	16368	3	3	13	Oxidation (M); Deamidation (NQ)	47756	Lupus La protein homolog OS=Mus musculus OX=10090 GN=Ssb PE=1 SV=1
656	837	Q9Z1Y4|TRIP6_MOUSE	118.78	5	5	590.78	2	2	4	Carbamidomethylation	50934	Thyroid receptor-interacting protein 6 OS=Mus musculus OX=10090 GN=Trip6 PE=1 SV=1
808	466	P10107|ANXA1_MOUSE	118.16	7	7	3134.8	2	2	2		38734	Annexin A1 OS=Mus musculus OX=10090 GN=Anxa1 PE=1 SV=2
510	381	Q69ZR9|TASOR_MOUSE	118.1	3	3	281.65	3	3	6	Acetylation (Protein N-term)	181395	Protein TASOR OS=Mus musculus OX=10090 GN=Tasor PE=1 SV=2
491	340	Q7TSY8|SGO2_MOUSE	117.97	4	4	1115.2	3	3	6	Carbamidomethylation	130277	Shugoshin 2 OS=Mus musculus OX=10090 GN=Sgo2 PE=1 SV=1
286	591	O08583|THOC4_MOUSE	117.87	12	12	18566	2	2	13	Oxidation (M); Acetylation (Protein N-term); Deamidation (NQ)	26940	THO complex subunit 4 OS=Mus musculus OX=10090 GN=Alyref PE=1 SV=3
174	1372	Q9CRB2|NHP2_MOUSE	117.68	11	11	34714	1	1	21	Carbamidomethylation	17247	H/ACA ribonucleoprotein complex subunit 2 OS=Mus musculus OX=10090 GN=Nhp2 PE=1 SV=1
483	352	P70255|NFIC_MOUSE	117.67	8	8	399.78	3	2	6	Carbamidomethylation	48768	Nuclear factor 1 C-type OS=Mus musculus OX=10090 GN=Nfic PE=1 SV=1
745	827	P83870|PHF5A_MOUSE	117.63	26	26	3107.4	2	2	3	Carbamidomethylation	12405	PHD finger-like domain-containing protein 5A OS=Mus musculus OX=10090 GN=Phf5a PE=1 SV=1
247	815	Q9DCT8|CRIP2_MOUSE	117.54	18	18	13687	2	2	15	Carbamidomethylation; Oxidation (M); Deamidation (NQ)	22727	Cysteine-rich protein 2 OS=Mus musculus OX=10090 GN=Crip2 PE=1 SV=1
398	416	Q62318|TIF1B_MOUSE	117.35	7	7	22472	3	3	9	Acetylation (Protein N-term)	88847	Transcription intermediary factor 1-beta OS=Mus musculus OX=10090 GN=Trim28 PE=1 SV=3
535	232	Q8BVE8|NSD2_MOUSE	117.15	3	3	2780	3	3	5		152253	Histone-lysine N-methyltransferase NSD2 OS=Mus musculus OX=10090 GN=Nsd2 PE=1 SV=2
297	393	Q7TMF2|ERI1_MOUSE	117.05	8	8	2330.6	2	2	12	Carbamidomethylation; Deamidation (NQ)	39493	3'-5' exoribonuclease 1 OS=Mus musculus OX=10090 GN=Eri1 PE=1 SV=2
462	684	Q8CHY6|P66A_MOUSE	117.04	4	4	1179.8	2	2	7		67334	Transcriptional repressor p66 alpha OS=Mus musculus OX=10090 GN=Gatad2a PE=1 SV=2
625	422	Q9EQI8|RM46_MOUSE	116.86	12	12	3456.7	3	3	4	Oxidation (M); Deamidation (NQ)	32132	39S ribosomal protein L46 mitochondrial OS=Mus musculus OX=10090 GN=Mrpl46 PE=1 SV=1
355	249	P27773|PDIA3_MOUSE	116.6	10	10	15685	4	4	10		56678	Protein disulfide-isomerase A3 OS=Mus musculus OX=10090 GN=Pdia3 PE=1 SV=2
424	844	Q6P1F6|2ABA_MOUSE	116.48	6	6	2289.1	2	2	8	Carbamidomethylation; Acetylation (Protein N-term); Deamidation (NQ)	51692	Serine/threonine-protein phosphatase 2A 55 kDa regulatory subunit B alpha isoform OS=Mus musculus OX=10090 GN=Ppp2r2a PE=1 SV=1
440	174	F6ZDS4|TPR_MOUSE	115.74	2	2	1669.7	3	3	7	Carbamidomethylation	273988	Nucleoprotein TPR OS=Mus musculus OX=10090 GN=Tpr PE=1 SV=1
216	573	E9QAM5|HELZ2_MOUSE	115.64	1	1	45.756	1	1	17		331563	Helicase with zinc finger domain 2 OS=Mus musculus OX=10090 GN=Helz2 PE=1 SV=1
133	1474	P47915|RL29_MOUSE	115.61	7	7	140690	1	1	27	Deamidation (NQ)	17587	60S ribosomal protein L29 OS=Mus musculus OX=10090 GN=Rpl29 PE=1 SV=2
570	559	Q8CGB6|TNS2_MOUSE	115.48	2	2	1507.1	2	2	5		152012	Tensin-2 OS=Mus musculus OX=10090 GN=Tns2 PE=1 SV=1
363	867	P10854|H2B1M_MOUSE	115.47	16	16	36658	2	2	10		13936	Histone H2B type 1-M OS=Mus musculus OX=10090 GN=H2bc14 PE=1 SV=2
363	868	Q6ZWY9|H2B1C_MOUSE	115.47	16	16	36658	2	2	10		13906	Histone H2B type 1-C/E/G OS=Mus musculus OX=10090 GN=H2bc4 PE=1 SV=3
363	869	Q64475|H2B1B_MOUSE	115.47	16	16	36658	2	2	10		13952	Histone H2B type 1-B OS=Mus musculus OX=10090 GN=Hist1h2bb PE=1 SV=3
363	870	Q8CGP2|H2B1P_MOUSE	115.47	16	16	36658	2	2	10		13992	Histone H2B type 1-P OS=Mus musculus OX=10090 GN=Hist1h2bp PE=1 SV=3
363	871	Q64478|H2B1H_MOUSE	115.47	16	16	36658	2	2	10		13920	Histone H2B type 1-H OS=Mus musculus OX=10090 GN=Hist1h2bh PE=1 SV=3
363	872	Q64525|H2B2B_MOUSE	115.47	16	16	36658	2	2	10		13920	Histone H2B type 2-B OS=Mus musculus OX=10090 GN=Hist2h2bb PE=1 SV=3
363	873	P10853|H2B1F_MOUSE	115.47	16	16	36658	2	2	10		13936	Histone H2B type 1-F/J/L OS=Mus musculus OX=10090 GN=H2bc7 PE=1 SV=2
363	874	Q8CGP1|H2B1K_MOUSE	115.47	16	16	36658	2	2	10		13920	Histone H2B type 1-K OS=Mus musculus OX=10090 GN=H2bc12 PE=1 SV=3
469	885	O08579|EMD_MOUSE	115.38	10	10	1444.3	2	2	7	Oxidation (M)	29436	Emerin OS=Mus musculus OX=10090 GN=Emd PE=1 SV=1
508	374	Q8BKF1|RPOM_MOUSE	115.38	3	3	4045	3	3	6		136705	DNA-directed RNA polymerase mitochondrial OS=Mus musculus OX=10090 GN=Polrmt PE=1 SV=1
428	411	Q60932|VDAC1_MOUSE	115.33	14	14	2128	3	3	8	Carbamidomethylation	32351	Voltage-dependent anion-selective channel protein 1 OS=Mus musculus OX=10090 GN=Vdac1 PE=1 SV=3
455	452	Q60930|VDAC2_MOUSE	115.27	15	15	468	3	3	7	Carbamidomethylation	31733	Voltage-dependent anion-selective channel protein 2 OS=Mus musculus OX=10090 GN=Vdac2 PE=1 SV=2
411	567	P28301|LYOX_MOUSE	115.16	6	6	452.34	2	2	8	Carbamidomethylation	46701	Protein-lysine 6-oxidase OS=Mus musculus OX=10090 GN=Lox PE=1 SV=1
379	330	P61255|RL26_MOUSE	115.12	19	19	25265	3	3	9	Oxidation (M)	17258	60S ribosomal protein L26 OS=Mus musculus OX=10090 GN=Rpl26 PE=1 SV=1
615	368	Q9WVA4|TAGL2_MOUSE	115.12	18	18	4103.1	3	3	4	Oxidation (M)	22395	Transgelin-2 OS=Mus musculus OX=10090 GN=Tagln2 PE=1 SV=4
315	166	B1AY10|NFX1_MOUSE	115.05	5	5	741.04	4	4	11	Carbamidomethylation; Acetylation (Protein N-term)	123811	Transcriptional repressor NF-X1 OS=Mus musculus OX=10090 GN=Nfx1 PE=1 SV=1
715	436	Q9CRB9|MIC19_MOUSE	114.83	18	18	4691.6	3	3	3		26335	MICOS complex subunit Mic19 OS=Mus musculus OX=10090 GN=Chchd3 PE=1 SV=1
879	828	Q6ZPL9|DDX55_MOUSE	114.45	5	5	1122.7	2	2	2		68465	ATP-dependent RNA helicase DDX55 OS=Mus musculus OX=10090 GN=Ddx55 PE=1 SV=2
631	676	Q99KN9|EPN4_MOUSE	114.41	4	4	5684.1	2	2	4		68513	Clathrin interactor 1 OS=Mus musculus OX=10090 GN=Clint1 PE=1 SV=2
614	362	Q9Z1D1|EIF3G_MOUSE	114.38	11	11	1607	3	3	4		35638	Eukaryotic translation initiation factor 3 subunit G OS=Mus musculus OX=10090 GN=Eif3g PE=1 SV=2
420	509	Q8VDF2|UHRF1_MOUSE	113.99	3	3	293.28	2	2	8	Carbamidomethylation	88304	E3 ubiquitin-protein ligase UHRF1 OS=Mus musculus OX=10090 GN=Uhrf1 PE=1 SV=2
820	862	P31266|SUH_MOUSE	113.76	4	4	4021.7	2	2	2	Carbamidomethylation	58537	Recombining binding protein suppressor of hairless OS=Mus musculus OX=10090 GN=Rbpj PE=1 SV=1
445	480	Q78PY7|SND1_MOUSE	113.7	3	3	4348.6	2	2	7		102088	Staphylococcal nuclease domain-containing protein 1 OS=Mus musculus OX=10090 GN=Snd1 PE=1 SV=1
299	163	Q9ERG0|LIMA1_MOUSE	113.35	9	9	14367	5	5	12	Carbamidomethylation; Oxidation (M); Deamidation (NQ)	84060	LIM domain and actin-binding protein 1 OS=Mus musculus OX=10090 GN=Lima1 PE=1 SV=3
495	561	Q6PDM2|SRSF1_MOUSE	112.79	9	9	3182.4	2	2	6	Carbamidomethylation	27745	Serine/arginine-rich splicing factor 1 OS=Mus musculus OX=10090 GN=Srsf1 PE=1 SV=3
659	852	P13020|GELS_MOUSE	112.43	3	3	1087.8	2	2	4		85942	Gelsolin OS=Mus musculus OX=10090 GN=Gsn PE=1 SV=3
502	458	O88342|WDR1_MOUSE	112.39	6	6	3874.4	2	2	6	Carbamidomethylation; Oxidation (M)	66407	WD repeat-containing protein 1 OS=Mus musculus OX=10090 GN=Wdr1 PE=1 SV=3
496	599	P49718|MCM5_MOUSE	112.26	3	3	3498.5	2	2	6		82407	DNA replication licensing factor MCM5 OS=Mus musculus OX=10090 GN=Mcm5 PE=1 SV=2
480	267	Q99PU8|DHX30_MOUSE	112.17	3	3	4218.5	3	3	6	Carbamidomethylation	136668	ATP-dependent RNA helicase DHX30 OS=Mus musculus OX=10090 GN=Dhx30 PE=1 SV=1
600	515	Q8R1B4|EIF3C_MOUSE	112.03	3	3	7146.8	2	2	4	Carbamidomethylation; Deamidation (NQ)	105531	Eukaryotic translation initiation factor 3 subunit C OS=Mus musculus OX=10090 GN=Eif3c PE=1 SV=1
468	834	Q9D2L9|F111A_MOUSE	111.9	4	4	1505.2	2	2	7	Carbamidomethylation; Deamidation (NQ)	69949	Protein FAM111A OS=Mus musculus OX=10090 GN=Fam111a PE=2 SV=1
566	342	Q03145|EPHA2_MOUSE	111.62	4	4	1044.7	3	3	5	Carbamidomethylation	108852	Ephrin type-A receptor 2 OS=Mus musculus OX=10090 GN=Epha2 PE=1 SV=3
740	419	Q9D753|EXOS8_MOUSE	111.57	16	16	4159.5	3	3	3	Carbamidomethylation	29949	Exosome complex component RRP43 OS=Mus musculus OX=10090 GN=Exosc8 PE=1 SV=1
503	541	Q91VE6|MK67I_MOUSE	111.3	13	13	8040	2	2	6	Carbamidomethylation; Acetylation (Protein N-term)	36265	MKI67 FHA domain-interacting nucleolar phosphoprotein OS=Mus musculus OX=10090 GN=Nifk PE=1 SV=1
518	1137	Q91YE6|IPO9_MOUSE	111.14	2	2	847.71	1	1	6	Acetylation (Protein N-term); Deamidation (NQ)	116052	Importin-9 OS=Mus musculus OX=10090 GN=Ipo9 PE=1 SV=3
545	358	Q91WK2|EIF3H_MOUSE	110.94	9	9	4031.5	2	2	5		39832	Eukaryotic translation initiation factor 3 subunit H OS=Mus musculus OX=10090 GN=Eif3h PE=1 SV=1
433	859	P62806|H4_MOUSE	110.83	19	19	38390	2	2	8		11367	Histone H4 OS=Mus musculus OX=10090 GN=H4c1 PE=1 SV=2
450	461	P70257|NFIX_MOUSE	110.82	9	9	2869	3	2	7	Oxidation (M)	53394	Nuclear factor 1 X-type OS=Mus musculus OX=10090 GN=Nfix PE=1 SV=2
489	241	Q8CJG0|AGO2_MOUSE	110.23	4	4	3640.8	3	3	6	Oxidation (M)	97304	Protein argonaute-2 OS=Mus musculus OX=10090 GN=Ago2 PE=1 SV=3
328	895	Q9D883|U2AF1_MOUSE	110.2	9	9	11185	2	2	11	Carbamidomethylation	27815	Splicing factor U2AF 35 kDa subunit OS=Mus musculus OX=10090 GN=U2af1 PE=1 SV=4
654	470	P06151|LDHA_MOUSE	110.04	10	10	5600.2	3	3	4	Carbamidomethylation	36499	L-lactate dehydrogenase A chain OS=Mus musculus OX=10090 GN=Ldha PE=1 SV=3
657	839	Q9R0P5|DEST_MOUSE	110.02	14	14	4013.3	2	2	4	Carbamidomethylation; Acetylation (Protein N-term)	18522	Destrin OS=Mus musculus OX=10090 GN=Dstn PE=1 SV=3
467	569	B2RQC6|PYR1_MOUSE	109.96	1	1	881.18	2	2	7		243236	CAD protein OS=Mus musculus OX=10090 GN=Cad PE=1 SV=1
688	640	Q61624|ZN148_MOUSE	109.93	2	2	195.99	1	1	3		88751	Zinc finger protein 148 OS=Mus musculus OX=10090 GN=Znf148 PE=1 SV=2
550	826	P09411|PGK1_MOUSE	109.93	8	8	998.76	2	2	5	Carbamidomethylation; Oxidation (M)	44550	Phosphoglycerate kinase 1 OS=Mus musculus OX=10090 GN=Pgk1 PE=1 SV=4
586	916	Q8BU11|TOX4_MOUSE	109.85	6	6	2164.3	2	2	5	Deamidation (NQ)	65961	TOX high mobility group box family member 4 OS=Mus musculus OX=10090 GN=Tox4 PE=1 SV=3
509	377	Q9D903|EBP2_MOUSE	109.79	13	13	7644.5	3	3	6	Carbamidomethylation	34703	Probable rRNA-processing protein EBP2 OS=Mus musculus OX=10090 GN=Ebna1bp2 PE=2 SV=1
484	500	Q62136|PTN21_MOUSE	109.77	3	3	687.56	2	2	6	Carbamidomethylation; Deamidation (NQ)	133491	Tyrosine-protein phosphatase non-receptor type 21 OS=Mus musculus OX=10090 GN=Ptpn21 PE=1 SV=1
716	454	Q8BMA6|SRP68_MOUSE	109.34	5	5	893.69	3	3	3		70574	Signal recognition particle subunit SRP68 OS=Mus musculus OX=10090 GN=Srp68 PE=1 SV=2
243	1371	Q8BGB5|LIMD2_MOUSE	108.96	13	13	882.59	1	1	15	Oxidation (M); Acetylation (Protein N-term)	14237	LIM domain-containing protein 2 OS=Mus musculus OX=10090 GN=Limd2 PE=1 SV=1
361	836	P68254|1433T_MOUSE	108.67	11	11	2462.8	2	2	10		27778	14-3-3 protein theta OS=Mus musculus OX=10090 GN=Ywhaq PE=1 SV=1
809	499	Q91Z96|BMP2K_MOUSE	108.64	2	2	1963.6	2	2	2		126185	BMP-2-inducible protein kinase OS=Mus musculus OX=10090 GN=Bmp2k PE=1 SV=1
392	497	Q61103|REQU_MOUSE	108.63	8	8	2630.3	2	2	9	Carbamidomethylation; Deamidation (NQ)	44230	Zinc finger protein ubi-d4 OS=Mus musculus OX=10090 GN=Dpf2 PE=1 SV=1
406	489	Q9ER69|FL2D_MOUSE	108.58	7	7	999.97	2	2	8		44177	Pre-mRNA-splicing regulator WTAP OS=Mus musculus OX=10090 GN=Wtap PE=1 SV=3
561	899	Q64433|CH10_MOUSE	108.47	24	24	5981.7	2	2	5		10963	10 kDa heat shock protein mitochondrial OS=Mus musculus OX=10090 GN=Hspe1 PE=1 SV=2
692	912	P53986|MOT1_MOUSE	108.29	7	7	526.97	2	2	3		53267	Monocarboxylate transporter 1 OS=Mus musculus OX=10090 GN=Slc16a1 PE=1 SV=1
497	677	Q8CGZ0|CHERP_MOUSE	107.85	2	2	1079.9	2	2	6	Carbamidomethylation	106169	Calcium homeostasis endoplasmic reticulum protein OS=Mus musculus OX=10090 GN=Cherp PE=1 SV=1
464	1067	Q9CR62|M2OM_MOUSE	107.83	5	5	2866	1	1	7		34155	Mitochondrial 2-oxoglutarate/malate carrier protein OS=Mus musculus OX=10090 GN=Slc25a11 PE=1 SV=3
655	822	O35368|IFI3_MOUSE	107.67	8	8	1244.3	2	2	4	Deamidation (NQ)	46300	Interferon-activable protein 203 OS=Mus musculus OX=10090 GN=Ifi203 PE=1 SV=1
895	1383	Q7TN98|CPEB4_MOUSE	107.57	2	2	885.67	1	1	2	Acetylation (Protein N-term)	80122	Cytoplasmic polyadenylation element-binding protein 4 OS=Mus musculus OX=10090 GN=Cpeb4 PE=1 SV=1
980	985	Q9R099|TBL2_MOUSE	107.5	3	3	329.09	1	1	1		49584	Transducin beta-like protein 2 OS=Mus musculus OX=10090 GN=Tbl2 PE=1 SV=2
301	455	O54724|CAVN1_MOUSE	107.42	8	8	6910.3	2	2	12	Oxidation (M)	43954	Caveolae-associated protein 1 OS=Mus musculus OX=10090 GN=Cavin1 PE=1 SV=1
750	887	Q3UHX9|CI114_MOUSE	107.36	6	6	1771.4	2	2	3	Carbamidomethylation	42958	Putative methyltransferase C9orf114 homolog OS=Mus musculus OX=10090 GN=Spout1 PE=1 SV=1
539	331	P97350|PKP1_MOUSE	107.16	6	6	872.41	3	3	5	Carbamidomethylation	80896	Plakophilin-1 OS=Mus musculus OX=10090 GN=Pkp1 PE=1 SV=1
569	453	P14131|RS16_MOUSE	106.73	17	17	37917	3	3	5	Carbamidomethylation	16445	40S ribosomal protein S16 OS=Mus musculus OX=10090 GN=Rps16 PE=1 SV=4
612	947	P45591|COF2_MOUSE	106.51	14	14	186.29	2	1	4	Acetylation (Protein N-term)	18710	Cofilin-2 OS=Mus musculus OX=10090 GN=Cfl2 PE=1 SV=1
312	855	Q9Z204|HNRPC_MOUSE	105.93	8	8	435.97	2	2	12	Oxidation (M)	34385	Heterogeneous nuclear ribonucleoproteins C1/C2 OS=Mus musculus OX=10090 GN=Hnrnpc PE=1 SV=1
453	336	Q9CWX9|DDX47_MOUSE	105.78	7	7	13896	3	3	7	Oxidation (M)	50639	Probable ATP-dependent RNA helicase DDX47 OS=Mus musculus OX=10090 GN=Ddx47 PE=2 SV=2
548	481	Q8VI84|NOC3L_MOUSE	105.67	3	3	446.25	2	2	5	Carbamidomethylation	93211	Nucleolar complex protein 3 homolog OS=Mus musculus OX=10090 GN=Noc3l PE=2 SV=2
511	383	Q9Z2N8|ACL6A_MOUSE	105.41	8	8	5970.7	3	3	6	Oxidation (M)	47448	Actin-like protein 6A OS=Mus musculus OX=10090 GN=Actl6a PE=1 SV=2
605	533	O54941|SMCE1_MOUSE	105.37	6	6	7150	2	2	4	Deamidation (NQ)	46638	SWI/SNF-related matrix-associated actin-dependent regulator of chromatin subfamily E member 1 OS=Mus musculus OX=10090 GN=Smarce1 PE=1 SV=1
452	255	Q91YU8|SSF1_MOUSE	105.15	10	10	1066	4	4	7		52756	Suppressor of SWI4 1 homolog OS=Mus musculus OX=10090 GN=Ppan PE=1 SV=2
709	935	O55135|IF6_MOUSE	105.12	10	10	16195	2	2	3	Carbamidomethylation; Deamidation (NQ)	26511	Eukaryotic translation initiation factor 6 OS=Mus musculus OX=10090 GN=Eif6 PE=1 SV=2
399	456	P40630|TFAM_MOUSE	105.01	11	11	2969.3	3	3	9		27988	Transcription factor A mitochondrial OS=Mus musculus OX=10090 GN=Tfam PE=1 SV=2
760	944	P46935|NEDD4_MOUSE	105	3	3	1545.3	2	2	3		102706	E3 ubiquitin-protein ligase NEDD4 OS=Mus musculus OX=10090 GN=Nedd4 PE=1 SV=3
882	918	Q9DCH4|EIF3F_MOUSE	104.75	7	7	1343.5	2	2	2		37984	Eukaryotic translation initiation factor 3 subunit F OS=Mus musculus OX=10090 GN=Eif3f PE=1 SV=2
482	324	P80314|TCPB_MOUSE	104.43	9	9	5694	4	4	6	Oxidation (M)	57477	T-complex protein 1 subunit beta OS=Mus musculus OX=10090 GN=Cct2 PE=1 SV=4
575	878	Q9QYJ0|DNJA2_MOUSE	104.4	6	6	7083.4	2	2	5	Carbamidomethylation; Deamidation (NQ)	45746	DnaJ homolog subfamily A member 2 OS=Mus musculus OX=10090 GN=Dnaja2 PE=1 SV=1
340	900	Q5XFZ0|CR021_MOUSE	104.37	12	12	1579.2	2	2	11	Carbamidomethylation; Deamidation (NQ)	24123	UPF0711 protein C18orf21 homolog OS=Mus musculus OX=10090 PE=2 SV=2
747	831	P80315|TCPD_MOUSE	104.33	6	6	686.81	2	2	3		58066	T-complex protein 1 subunit delta OS=Mus musculus OX=10090 GN=Cct4 PE=1 SV=3
362	849	P62852|RS25_MOUSE	104	19	19	107750	2	2	10		13742	40S ribosomal protein S25 OS=Mus musculus OX=10090 GN=Rps25 PE=1 SV=1
880	881	Q9DCD0|6PGD_MOUSE	103.86	4	4	2666.7	2	2	2		53247	6-phosphogluconate dehydrogenase decarboxylating OS=Mus musculus OX=10090 GN=Pgd PE=1 SV=3
454	346	Q8C5L7|RBM34_MOUSE	103.81	7	7	1444.8	3	3	7	Carbamidomethylation	49116	RNA-binding protein 34 OS=Mus musculus OX=10090 GN=Rbm34 PE=1 SV=2
884	925	P47758|SRPRB_MOUSE	103.47	12	12	502.29	2	2	2		29579	Signal recognition particle receptor subunit beta OS=Mus musculus OX=10090 GN=Srprb PE=1 SV=1
443	385	Q99K48|NONO_MOUSE	103.31	8	8	2232.2	3	3	7	Oxidation (M)	54541	Non-POU domain-containing octamer-binding protein OS=Mus musculus OX=10090 GN=Nono PE=1 SV=3
607	335	P60229|EIF3E_MOUSE	102.88	8	8	2309.5	3	3	4		52221	Eukaryotic translation initiation factor 3 subunit E OS=Mus musculus OX=10090 GN=Eif3e PE=1 SV=1
803	633	Q8CCS6|PABP2_MOUSE	102.58	5	5	3935.9	1	1	2	Acetylation (Protein N-term)	32297	Polyadenylate-binding protein 2 OS=Mus musculus OX=10090 GN=Pabpn1 PE=1 SV=3
753	903	P97855|G3BP1_MOUSE	102.52	6	6	5467.9	2	2	3		51829	Ras GTPase-activating protein-binding protein 1 OS=Mus musculus OX=10090 GN=G3bp1 PE=1 SV=1
627	486	Q8BFW7|LPP_MOUSE	101.96	5	5	922.3	2	2	4		65891	Lipoma-preferred partner homolog OS=Mus musculus OX=10090 GN=Lpp PE=1 SV=1
516	856	Q60972|RBBP4_MOUSE	101.84	6	6	11603	2	2	6	Carbamidomethylation; Oxidation (M); Acetylation (Protein N-term)	47656	Histone-binding protein RBBP4 OS=Mus musculus OX=10090 GN=Rbbp4 PE=1 SV=5
674	259	Q3UHX0|NOL8_MOUSE	101.78	2	2	1792.4	2	2	3	Oxidation (M)	128635	Nucleolar protein 8 OS=Mus musculus OX=10090 GN=Nol8 PE=1 SV=2
364	904	P16045|LEG1_MOUSE	101.44	19	19	4576.1	2	2	10	Oxidation (M)	14866	Galectin-1 OS=Mus musculus OX=10090 GN=Lgals1 PE=1 SV=3
500	376	Q8C9B9|DIDO1_MOUSE	101.25	2	2	841.74	3	3	6	Carbamidomethylation	247173	Death-inducer obliterator 1 OS=Mus musculus OX=10090 GN=Dido1 PE=1 SV=4
1037	1244	P97801|SMN_MOUSE	100.85	6	6	59.196	1	1	1	Acetylation (Protein N-term)	31254	Survival motor neuron protein OS=Mus musculus OX=10090 GN=Smn1 PE=1 SV=1
596	179	P16546|SPTN1_MOUSE	100.82	1	1	1517.2	3	3	4		284596	Spectrin alpha chain non-erythrocytic 1 OS=Mus musculus OX=10090 GN=Sptan1 PE=1 SV=4
578	908	Q9CZT6|CMS1_MOUSE	100.58	9	9	5467.6	2	2	5	Carbamidomethylation	31594	Protein CMSS1 OS=Mus musculus OX=10090 GN=Cmss1 PE=2 SV=1
385	388	Q8BHS3|RBM22_MOUSE	100.36	5	5	366.76	2	2	9	Acetylation (Protein N-term)	46896	Pre-mRNA-splicing factor RBM22 OS=Mus musculus OX=10090 GN=Rbm22 PE=1 SV=1
461	673	E9Q4N7|ARI1B_MOUSE	100.25	2	2	179.27	2	1	7	Deamidation (NQ)	237793	AT-rich interactive domain-containing protein 1B OS=Mus musculus OX=10090 GN=Arid1b PE=1 SV=1
683	516	Q3TFK5|GPTC4_MOUSE	100.21	7	7	1859.3	2	2	3		46554	G patch domain-containing protein 4 OS=Mus musculus OX=10090 GN=Gpatch4 PE=1 SV=1
365	1439	P14115|RL27A_MOUSE	100.14	8	8	80941	1	1	10	Carbamidomethylation; Deamidation (NQ)	16605	60S ribosomal protein L27a OS=Mus musculus OX=10090 GN=Rpl27a PE=1 SV=5
579	1242	Q00899|TYY1_MOUSE	100.04	5	5	567.28	1	1	5		44717	Transcriptional repressor protein YY1 OS=Mus musculus OX=10090 GN=Yy1 PE=1 SV=1
707	875	Q99J62|RFC4_MOUSE	99.99	6	6	4929.6	2	2	3		39867	Replication factor C subunit 4 OS=Mus musculus OX=10090 GN=Rfc4 PE=1 SV=1
576	886	P62858|RS28_MOUSE	99.7	29	29	3733.8	2	2	5	Carbamidomethylation	7841	40S ribosomal protein S28 OS=Mus musculus OX=10090 GN=Rps28 PE=1 SV=1
682	586	Q9CQV8|1433B_MOUSE	99.65	12	12	1319.7	2	2	3		28086	14-3-3 protein beta/alpha OS=Mus musculus OX=10090 GN=Ywhab PE=1 SV=3
761	1375	Q8BTW3|EXOS6_MOUSE	99.47	6	6	2873.3	1	1	3		28370	Exosome complex component MTR3 OS=Mus musculus OX=10090 GN=Exosc6 PE=1 SV=1
723	637	Q9CYH6|RRS1_MOUSE	99.42	6	6	4554.4	2	2	3		41552	Ribosome biogenesis regulatory protein homolog OS=Mus musculus OX=10090 GN=Rrs1 PE=1 SV=1
431	575	Q9D1R9|RL34_MOUSE	99.41	15	15	89967	2	2	8	Deamidation (NQ)	13293	60S ribosomal protein L34 OS=Mus musculus OX=10090 GN=Rpl34 PE=1 SV=2
477	847	Q922G2|FA76A_MOUSE	99.27	8	8	3314.6	2	2	7		35095	Protein FAM76A OS=Mus musculus OX=10090 GN=Fam76a PE=2 SV=1
395	858	O08992|SDCB1_MOUSE	99.19	10	10	2784.4	2	2	9	Carbamidomethylation; Oxidation (M); Deamidation (NQ)	32379	Syntenin-1 OS=Mus musculus OX=10090 GN=Sdcbp PE=1 SV=1
346	842	Q99L28|RLP24_MOUSE	98.64	17	17	5192.5	2	2	10	Oxidation (M)	19611	Probable ribosome biogenesis protein RLP24 OS=Mus musculus OX=10090 GN=Rsl24d1 PE=2 SV=1
691	894	Q9WUM5|SUCA_MOUSE	98.57	7	7	1846	2	2	3	Carbamidomethylation	36155	Succinate--CoA ligase [ADP/GDP-forming] subunit alpha mitochondrial OS=Mus musculus OX=10090 GN=Suclg1 PE=1 SV=4
540	482	Q8C4J7|TBL3_MOUSE	98.51	3	3	1078.8	2	2	5	Carbamidomethylation; Acetylation (Protein N-term)	88266	Transducin beta-like protein 3 OS=Mus musculus OX=10090 GN=Tbl3 PE=2 SV=1
580	1377	O35682|MYADM_MOUSE	98.39	5	5	10177	1	1	5		35285	Myeloid-associated differentiation marker OS=Mus musculus OX=10090 GN=Myadm PE=1 SV=2
554	235	Q8BGZ7|K2C75_MOUSE	98.2	7	7	5639	4	2	5	Carbamidomethylation; Oxidation (M)	59741	Keratin type II cytoskeletal 75 OS=Mus musculus OX=10090 GN=Krt75 PE=1 SV=1
764	1401	Q8BGS0|MAK16_MOUSE	97.97	5	5	708.87	1	1	3	Oxidation (M); Acetylation (Protein N-term)	35185	Protein MAK16 homolog OS=Mus musculus OX=10090 GN=Mak16 PE=1 SV=1
690	863	Q08369|GATA4_MOUSE	97.61	8	8	1677.4	2	2	3	Carbamidomethylation	44580	Transcription factor GATA-4 OS=Mus musculus OX=10090 GN=Gata4 PE=1 SV=4
529	939	O35887|CALU_MOUSE	97.49	8	8	1400.8	2	2	6	Deamidation (NQ)	37064	Calumenin OS=Mus musculus OX=10090 GN=Calu PE=1 SV=1
894	1381	Q61466|SMRD1_MOUSE	97.31	3	3	163.35	1	1	2		58245	SWI/SNF-related matrix-associated actin-dependent regulator of chromatin subfamily D member 1 OS=Mus musculus OX=10090 GN=Smarcd1 PE=1 SV=3
639	897	Q9D0D4|DIM1_MOUSE	97.19	6	6	1001.2	2	2	4	Carbamidomethylation	35274	Probable dimethyladenosine transferase OS=Mus musculus OX=10090 GN=Dimt1 PE=2 SV=1
708	888	Q8VEM8|MPCP_MOUSE	97.02	6	6	19148	2	2	3		39632	Phosphate carrier protein mitochondrial OS=Mus musculus OX=10090 GN=Slc25a3 PE=1 SV=1
799	498	P57776|EF1D_MOUSE	97.02	9	9	4506.8	2	2	2		31293	Elongation factor 1-delta OS=Mus musculus OX=10090 GN=Eef1d PE=1 SV=3
212	1373	Q9CYR0|SSBP_MOUSE	96.8	10	10	6481.4	1	1	18	Oxidation (M)	17319	Single-stranded DNA-binding protein mitochondrial OS=Mus musculus OX=10090 GN=Ssbp1 PE=1 SV=1
295	932	Q3UV17|K22O_MOUSE	96.5	3	3	170120	2	1	13	Carbamidomethylation; Deamidation (NQ)	62845	Keratin type II cytoskeletal 2 oral OS=Mus musculus OX=10090 GN=Krt76 PE=1 SV=1
891	1374	Q9CRA8|EXOS5_MOUSE	96.26	7	7	215.78	1	1	2		25194	Exosome complex component RRP46 OS=Mus musculus OX=10090 GN=Exosc5 PE=1 SV=1
1043	1382	Q8BUI3|LRWD1_MOUSE	96.13	3	3	310.27	1	1	1		71594	Leucine-rich repeat and WD repeat-containing protein 1 OS=Mus musculus OX=10090 GN=LRWD1 PE=2 SV=1
765	1407	Q8QZY9|SF3B4_MOUSE	96.08	3	3	6723.3	1	1	3		44356	Splicing factor 3B subunit 4 OS=Mus musculus OX=10090 GN=Sf3b4 PE=1 SV=1
309	704	Q91VC3|IF4A3_MOUSE	96.07	6	6	1568.2	2	2	12	Oxidation (M); Acetylation (Protein N-term)	46840	Eukaryotic initiation factor 4A-III OS=Mus musculus OX=10090 GN=Eif4a3 PE=1 SV=3
838	934	Q99LB0|TDIF1_MOUSE	95.94	9	9	1018.2	2	2	2	Carbamidomethylation	36852	Deoxynucleotidyltransferase terminal-interacting protein 1 OS=Mus musculus OX=10090 GN=Dnttip1 PE=1 SV=1
990	1265	O09110|MP2K3_MOUSE	95.81	5	5	93.023	1	1	1	Acetylation (Protein N-term)	39296	Dual specificity mitogen-activated protein kinase kinase 3 OS=Mus musculus OX=10090 GN=Map2k3 PE=1 SV=2
689	851	Q8K202|RPA49_MOUSE	95.72	5	5	8627.5	2	2	3		54034	DNA-directed RNA polymerase I subunit RPA49 OS=Mus musculus OX=10090 GN=Polr1e PE=1 SV=2
720	543	Q3UFB2|BCD1_MOUSE	95.7	5	5	2853.5	2	2	3	Carbamidomethylation	52213	Box C/D snoRNA protein 1 OS=Mus musculus OX=10090 GN=Znhit6 PE=1 SV=2
319	503	P13541|MYH3_MOUSE	95.46	1	1	8191.5	2	1	11	Carbamidomethylation; Deamidation (NQ)	223789	Myosin-3 OS=Mus musculus OX=10090 GN=Myh3 PE=2 SV=2
762	1391	P63325|RS10_MOUSE	95.39	8	8	5115.3	1	1	3		18916	40S ribosomal protein S10 OS=Mus musculus OX=10090 GN=Rps10 PE=1 SV=1
558	557	Q8C170|MYO9A_MOUSE	95.2	1	1	77.596	2	2	5	Carbamidomethylation	292118	Unconventional myosin-IXa OS=Mus musculus OX=10090 GN=Myo9a PE=1 SV=2
527	845	Q62188|DPYL3_MOUSE	95.09	6	6	714.49	2	2	6	Carbamidomethylation	61936	Dihydropyrimidinase-related protein 3 OS=Mus musculus OX=10090 GN=Dpysl3 PE=1 SV=1
637	890	P61965|WDR5_MOUSE	94.65	9	9	3184.7	2	2	4	Carbamidomethylation; Deamidation (NQ)	36589	WD repeat-containing protein 5 OS=Mus musculus OX=10090 GN=Wdr5 PE=1 SV=1
143	961	P27659|RL3_MOUSE	94.44	3	3	151840	1	1	25	Deamidation (NQ)	46110	60S ribosomal protein L3 OS=Mus musculus OX=10090 GN=Rpl3 PE=1 SV=3
412	618	Q9CY58|PAIRB_MOUSE	94.1	4	4	1834.4	1	1	8		44714	Plasminogen activator inhibitor 1 RNA-binding protein OS=Mus musculus OX=10090 GN=Serbp1 PE=1 SV=2
513	548	Q921F2|TADBP_MOUSE	93.84	7	7	5221.1	2	2	6	Deamidation (NQ)	44548	TAR DNA-binding protein 43 OS=Mus musculus OX=10090 GN=Tardbp PE=1 SV=1
727	907	Q9D0M0|EXOS7_MOUSE	93.77	9	9	2353.2	2	2	3	Carbamidomethylation; Acetylation (Protein N-term)	31825	Exosome complex exonuclease RRP42 OS=Mus musculus OX=10090 GN=Exosc7 PE=1 SV=2
756	926	Q8BFR5|EFTU_MOUSE	93.62	5	5	2726.5	2	2	3		49508	Elongation factor Tu mitochondrial OS=Mus musculus OX=10090 GN=Tufm PE=1 SV=1
744	468	P01027|CO3_MOUSE	93.61	2	2	294.47	3	3	3	Carbamidomethylation; Deamidation (NQ)	186483	Complement C3 OS=Mus musculus OX=10090 GN=C3 PE=1 SV=3
248	1419	P35282|RAB21_MOUSE	93.44	6	6	0	1	1	15	Acetylation (Protein N-term)	24106	Ras-related protein Rab-21 OS=Mus musculus OX=10090 GN=Rab21 PE=1 SV=4
813	576	Q8BKS9|PUM3_MOUSE	93.29	3	3	1601.1	2	2	2	Carbamidomethylation	72800	Pumilio homolog 3 OS=Mus musculus OX=10090 GN=Pum3 PE=1 SV=2
413	1176	Q6ZWU9|RS27_MOUSE	93.24	15	15	22803	1	1	8	Oxidation (M); Deamidation (NQ)	9461	40S ribosomal protein S27 OS=Mus musculus OX=10090 GN=Rps27 PE=1 SV=3
413	1406	Q6ZWY3|RS27L_MOUSE	93.24	15	15	22803	1	1	8	Oxidation (M); Deamidation (NQ)	9477	40S ribosomal protein S27-like OS=Mus musculus OX=10090 GN=Rps27l PE=1 SV=3
520	1367	P01644|KV5AB_MOUSE	93.15	17	17	2161.5	1	1	6	Oxidation (M)	11910	Ig kappa chain V-V region HP R16.7 OS=Mus musculus OX=10090 PE=1 SV=1
520	1368	P01647|KV5AE_MOUSE	93.15	17	17	2161.5	1	1	6	Oxidation (M)	11965	Ig kappa chain V-V region HP 124E1 OS=Mus musculus OX=10090 PE=1 SV=1
520	1369	P01645|KV5AC_MOUSE	93.15	17	17	2161.5	1	1	6	Oxidation (M)	11954	Ig kappa chain V-V region HP 93G7 OS=Mus musculus OX=10090 PE=1 SV=1
520	1370	P01643|KV5AA_MOUSE	93.15	17	17	2161.5	1	1	6	Oxidation (M)	11819	Ig kappa chain V-V region MOPC 173 OS=Mus musculus OX=10090 PE=1 SV=1
893	1379	Q71FD7|FBLI1_MOUSE	93.09	4	4	284.77	1	1	2	Carbamidomethylation	41026	Filamin-binding LIM protein 1 OS=Mus musculus OX=10090 GN=Fblim1 PE=1 SV=2
555	370	Q1HFZ0|NSUN2_MOUSE	92.95	3	3	1029.5	2	2	5	Carbamidomethylation	85452	RNA cytosine C(5)-methyltransferase NSUN2 OS=Mus musculus OX=10090 GN=Nsun2 PE=1 SV=2
444	392	Q5SWD9|TSR1_MOUSE	92.86	3	3	2315.5	2	2	7	Oxidation (M)	92105	Pre-rRNA-processing protein TSR1 homolog OS=Mus musculus OX=10090 GN=Tsr1 PE=1 SV=1
892	1376	Q80UU2|RPP38_MOUSE	92.76	6	6	3656.2	1	1	2		31129	Ribonuclease P protein subunit p38 OS=Mus musculus OX=10090 GN=Rpp38 PE=1 SV=1
498	692	Q8BSY0|ASPH_MOUSE	92.76	3	3	0	1	1	6		83042	Aspartyl/asparaginyl beta-hydroxylase OS=Mus musculus OX=10090 GN=Asph PE=1 SV=1
757	927	P62880|GBB2_MOUSE	92.4	6	6	2300.4	2	1	3	Carbamidomethylation	37331	Guanine nucleotide-binding protein G(I)/G(S)/G(T) subunit beta-2 OS=Mus musculus OX=10090 GN=Gnb2 PE=1 SV=3
609	487	Q9WVR4|FXR2_MOUSE	91.93	3	3	1902.7	2	1	4	Carbamidomethylation	73743	Fragile X mental retardation syndrome-related protein 2 OS=Mus musculus OX=10090 GN=Fxr2 PE=1 SV=1
262	475	Q9DBC7|KAP0_MOUSE	91.92	10	10	447.78	3	3	14	Carbamidomethylation; Oxidation (M); Acetylation (Protein N-term)	43185	cAMP-dependent protein kinase type I-alpha regulatory subunit OS=Mus musculus OX=10090 GN=Prkar1a PE=1 SV=3
789	380	Q9QWT9|KIFC1_MOUSE	91.86	4	4	976.69	2	2	2		74153	Kinesin-like protein KIFC1 OS=Mus musculus OX=10090 GN=Kifc1 PE=1 SV=2
608	464	Q3U821|WDR75_MOUSE	91.54	4	4	1401.6	3	3	4	Carbamidomethylation; Oxidation (M)	94037	WD repeat-containing protein 75 OS=Mus musculus OX=10090 GN=Wdr75 PE=1 SV=1
604	390	Q99LE6|ABCF2_MOUSE	91.44	4	4	3404.2	2	2	4		71782	ATP-binding cassette sub-family F member 2 OS=Mus musculus OX=10090 GN=Abcf2 PE=1 SV=1
836	853	Q9D8B3|CHM4B_MOUSE	91.21	11	11	3998.8	2	2	2		24936	Charged multivesicular body protein 4b OS=Mus musculus OX=10090 GN=Chmp4b PE=1 SV=2
541	550	P70670|NACAM_MOUSE	90.61	1	1	6585.9	1	1	5	Deamidation (NQ)	220497	Nascent polypeptide-associated complex subunit alpha muscle-specific form OS=Mus musculus OX=10090 GN=Naca PE=1 SV=2
541	1392	Q60817|NACA_MOUSE	90.61	7	7	6585.9	1	1	5	Deamidation (NQ)	23384	Nascent polypeptide-associated complex subunit alpha OS=Mus musculus OX=10090 GN=Naca PE=1 SV=1
533	199	Q61584|FXR1_MOUSE	90.44	8	8	1264.4	4	3	5	Deamidation (NQ)	76222	Fragile X mental retardation syndrome-related protein 1 OS=Mus musculus OX=10090 GN=Fxr1 PE=1 SV=2
759	938	Q3U1G5|I20L2_MOUSE	90.38	7	7	577.45	2	2	3	Carbamidomethylation	41020	Interferon-stimulated 20 kDa exonuclease-like 2 OS=Mus musculus OX=10090 GN=Isg20l2 PE=1 SV=2
538	367	Q69ZA1|CDK13_MOUSE	90.3	2	2	1056.5	2	2	5		164552	Cyclin-dependent kinase 13 OS=Mus musculus OX=10090 GN=Cdk13 PE=1 SV=3
858	1396	A2A7S8|K1522_MOUSE	90.25	2	2	837.1	1	1	2		104842	Uncharacterized protein KIAA1522 OS=Mus musculus OX=10090 GN=Kiaa1522 PE=1 SV=1
685	525	B1AQJ2|UBP36_MOUSE	90.13	2	2	925.19	2	2	3	Carbamidomethylation	119913	Ubiquitin carboxyl-terminal hydrolase 36 OS=Mus musculus OX=10090 GN=Usp36 PE=1 SV=1
663	1386	Q810D6|GRWD1_MOUSE	90.11	6	6	231.72	1	1	4	Carbamidomethylation; Deamidation (NQ)	49224	Glutamate-rich WD repeat-containing protein 1 OS=Mus musculus OX=10090 GN=Grwd1 PE=1 SV=2
728	911	P83940|ELOC_MOUSE	89.96	30	30	3373.2	2	2	3	Carbamidomethylation; Oxidation (M)	12473	Elongin-C OS=Mus musculus OX=10090 GN=Eloc PE=1 SV=1
1034	1233	Q8K4Z5|SF3A1_MOUSE	89.92	2	2	196.11	1	1	1		88545	Splicing factor 3A subunit 1 OS=Mus musculus OX=10090 GN=Sf3a1 PE=1 SV=1
881	883	P11440|CDK1_MOUSE	89.78	7	7	2496	2	2	2		34107	Cyclin-dependent kinase 1 OS=Mus musculus OX=10090 GN=Cdk1 PE=1 SV=3
267	1384	Q9D7S7|RL22L_MOUSE	89.48	12	12	6628.8	1	1	14		14467	60S ribosomal protein L22-like 1 OS=Mus musculus OX=10090 GN=Rpl22l1 PE=1 SV=1
556	494	P62317|SMD2_MOUSE	89.4	17	17	10104	2	2	5	Carbamidomethylation; Deamidation (NQ)	13527	Small nuclear ribonucleoprotein Sm D2 OS=Mus musculus OX=10090 GN=Snrpd2 PE=1 SV=1
492	363	Q99MJ9|DDX50_MOUSE	88.99	3	3	3809.8	2	2	6	Carbamidomethylation; Oxidation (M); Deamidation (NQ)	82176	ATP-dependent RNA helicase DDX50 OS=Mus musculus OX=10090 GN=Ddx50 PE=2 SV=1
485	510	P25206|MCM3_MOUSE	88.39	4	4	1225.5	2	2	6	Acetylation (Protein N-term)	91546	DNA replication licensing factor MCM3 OS=Mus musculus OX=10090 GN=Mcm3 PE=1 SV=2
743	462	Q8BWW4|LARP4_MOUSE	88.33	5	5	6986.2	3	3	3	Oxidation (M)	79763	La-related protein 4 OS=Mus musculus OX=10090 GN=Larp4 PE=1 SV=2
430	560	P19096|FAS_MOUSE	88.22	1	1	116.35	2	2	8		272426	Fatty acid synthase OS=Mus musculus OX=10090 GN=Fasn PE=1 SV=2
1086	1476	Q3TDQ1|STT3B_MOUSE	88.22	1	1	848.98	1	1	1		93246	Dolichyl-diphosphooligosaccharide--protein glycosyltransferase subunit STT3B OS=Mus musculus OX=10090 GN=Stt3b PE=1 SV=2
798	495	Q61595|KTN1_MOUSE	87.95	2	2	1019.5	2	2	2	Carbamidomethylation	152592	Kinectin OS=Mus musculus OX=10090 GN=Ktn1 PE=1 SV=1
287	1243	P26350|PTMA_MOUSE	87.76	13	13	8175.7	1	1	13	Acetylation (Protein N-term)	12254	Prothymosin alpha OS=Mus musculus OX=10090 GN=Ptma PE=1 SV=2
574	616	P19001|K1C19_MOUSE	87.63	6	6	189.29	2	1	5	Oxidation (M); Acetylation (Protein N-term); Deamidation (NQ)	44542	Keratin type I cytoskeletal 19 OS=Mus musculus OX=10090 GN=Krt19 PE=1 SV=1
742	450	P48962|ADT1_MOUSE	87.6	10	10	3020	3	3	3	Carbamidomethylation; Acetylation (Protein N-term)	32904	ADP/ATP translocase 1 OS=Mus musculus OX=10090 GN=Slc25a4 PE=1 SV=4
726	865	Q61510|TRI25_MOUSE	87.46	4	4	1409.2	2	2	3	Carbamidomethylation	71726	E3 ubiquitin/ISG15 ligase TRIM25 OS=Mus musculus OX=10090 GN=Trim25 PE=1 SV=2
678	492	P11983|TCPA_MOUSE	87.32	3	3	435.49	1	1	3	Oxidation (M)	60449	T-complex protein 1 subunit alpha OS=Mus musculus OX=10090 GN=Tcp1 PE=1 SV=3
641	990	Q8VHR5|P66B_MOUSE	87.26	3	3	238.31	1	1	4		65411	Transcriptional repressor p66-beta OS=Mus musculus OX=10090 GN=Gatad2b PE=1 SV=1
589	1423	P02798|MT2_MOUSE	87.14	20	20	0	1	1	5	Carbamidomethylation	6115	Metallothionein-2 OS=Mus musculus OX=10090 GN=Mt2 PE=1 SV=2
666	1413	P01631|KV2A7_MOUSE	87.1	12	12	3671.2	1	1	4		12273	Ig kappa chain V-II region 26-10 OS=Mus musculus OX=10090 PE=1 SV=1
553	1535	Q99KP6|PRP19_MOUSE	87.05	2	2	15383	1	1	5	Deamidation (NQ)	55239	Pre-mRNA-processing factor 19 OS=Mus musculus OX=10090 GN=Prpf19 PE=1 SV=1
479	566	Q8R5K4|NOL6_MOUSE	86.99	2	2	2480.7	2	2	6	Carbamidomethylation; Oxidation (M)	129228	Nucleolar protein 6 OS=Mus musculus OX=10090 GN=Nol6 PE=2 SV=2
588	1388	Q3URQ0|TEX10_MOUSE	86.93	2	2	730.2	1	1	5		105209	Testis-expressed protein 10 OS=Mus musculus OX=10090 GN=Tex10 PE=1 SV=1
837	879	Q9JJ80|RPF2_MOUSE	86.92	8	8	18216	2	2	2		35364	Ribosome production factor 2 homolog OS=Mus musculus OX=10090 GN=Rpf2 PE=2 SV=2
626	465	P29391|FRIL1_MOUSE	86.68	19	19	11132	3	3	4	Oxidation (M)	20802	Ferritin light chain 1 OS=Mus musculus OX=10090 GN=Ftl1 PE=1 SV=2
824	1012	Q80X85|RT07_MOUSE	86.68	7	7	91.909	1	1	2		28063	28S ribosomal protein S7 mitochondrial OS=Mus musculus OX=10090 GN=Mrps7 PE=1 SV=1
833	593	Q8BGA5|KRR1_MOUSE	86.56	7	7	3632.3	2	2	2	Carbamidomethylation; Oxidation (M)	43538	KRR1 small subunit processome component homolog OS=Mus musculus OX=10090 GN=Krr1 PE=2 SV=1
669	1444	P51410|RL9_MOUSE	86.55	6	6	6839.6	1	1	4	Carbamidomethylation	21881	60S ribosomal protein L9 OS=Mus musculus OX=10090 GN=Rpl9 PE=2 SV=2
847	1043	Q9JJY4|DDX20_MOUSE	86.46	2	2	220.02	1	1	2		91710	Probable ATP-dependent RNA helicase DDX20 OS=Mus musculus OX=10090 GN=Ddx20 PE=1 SV=2
839	942	P97376|FRG1_MOUSE	86.36	10	10	5533.8	2	2	2		29127	Protein FRG1 OS=Mus musculus OX=10090 GN=Frg1 PE=1 SV=2
814	583	Q8CEC0|NUP88_MOUSE	85.65	3	3	9598.3	2	2	2	Carbamidomethylation	84938	Nuclear pore complex protein Nup88 OS=Mus musculus OX=10090 GN=Nup88 PE=1 SV=1
896	1387	Q64131|RUNX3_MOUSE	85.62	5	5	296.48	1	1	2		43518	Runt-related transcription factor 3 OS=Mus musculus OX=10090 GN=Runx3 PE=1 SV=3
619	693	P63276|RS17_MOUSE	85.18	8	8	7084.6	1	1	4	Carbamidomethylation	15524	40S ribosomal protein S17 OS=Mus musculus OX=10090 GN=Rps17 PE=1 SV=2
763	1398	Q921L3|TMCO1_MOUSE	84.99	7	7	1926.9	1	1	3		21175	Calcium load-activated calcium channel OS=Mus musculus OX=10090 GN=Tmco1 PE=1 SV=1
314	1420	Q3TZZ7|ESYT2_MOUSE	84.97	2	2	0	1	1	12	Acetylation (Protein N-term)	94139	Extended synaptotagmin-2 OS=Mus musculus OX=10090 GN=Esyt2 PE=1 SV=1
577	898	Q9CQS8|SC61B_MOUSE	84.89	26	26	5352.6	2	2	5		9958	Protein transport protein Sec61 subunit beta OS=Mus musculus OX=10090 GN=Sec61b PE=1 SV=3
664	1394	Q8BP92|RCN2_MOUSE	84.63	6	6	1038.7	1	1	4		37271	Reticulocalbin-2 OS=Mus musculus OX=10090 GN=Rcn2 PE=1 SV=1
562	917	Q9D1G1|RAB1B_MOUSE	84.63	10	10	85.395	2	1	5	Oxidation (M); Acetylation (Protein N-term)	22187	Ras-related protein Rab-1B OS=Mus musculus OX=10090 GN=Rab1b PE=1 SV=1
704	653	Q3UMT1|PP12C_MOUSE	84.47	4	4	108.29	2	2	3	Carbamidomethylation	84685	Protein phosphatase 1 regulatory subunit 12C OS=Mus musculus OX=10090 GN=Ppp1r12c PE=1 SV=1
681	558	P35293|RAB18_MOUSE	84.44	9	9	260.38	2	2	3	Acetylation (Protein N-term)	23035	Ras-related protein Rab-18 OS=Mus musculus OX=10090 GN=Rab18 PE=1 SV=2
783	528	Q8R2M2|TDIF2_MOUSE	84.4	2	2	1305.5	1	1	2		84277	Deoxynucleotidyltransferase terminal-interacting protein 2 OS=Mus musculus OX=10090 GN=Dnttip2 PE=1 SV=1
802	574	Q64331|MYO6_MOUSE	84.35	2	2	337.55	1	1	2		146409	Unconventional myosin-VI OS=Mus musculus OX=10090 GN=Myo6 PE=1 SV=1
665	1395	Q9D032|SSBP3_MOUSE	84.3	4	4	1447.7	1	1	4		40421	Single-stranded DNA-binding protein 3 OS=Mus musculus OX=10090 GN=Ssbp3 PE=1 SV=2
1070	1389	Q8K0H5|TAF10_MOUSE	84.3	11	11	623.28	1	1	1		21841	Transcription initiation factor TFIID subunit 10 OS=Mus musculus OX=10090 GN=Taf10 PE=1 SV=1
835	632	P46061|RAGP1_MOUSE	84.19	4	4	842.77	2	2	2		63531	Ran GTPase-activating protein 1 OS=Mus musculus OX=10090 GN=Rangap1 PE=1 SV=2
804	975	Q80UW8|RPAB1_MOUSE	84.09	7	7	152.83	1	1	2	Deamidation (NQ)	24570	DNA-directed RNA polymerases I II and III subunit RPABC1 OS=Mus musculus OX=10090 GN=Polr2e PE=1 SV=1
767	1416	P42932|TCPQ_MOUSE	83.89	3	3	578.62	1	1	3		59556	T-complex protein 1 subunit theta OS=Mus musculus OX=10090 GN=Cct8 PE=1 SV=3
305	1037	P62900|RL31_MOUSE	83.76	8	8	27066	1	1	12	Deamidation (NQ)	14463	60S ribosomal protein L31 OS=Mus musculus OX=10090 GN=Rpl31 PE=1 SV=1
617	551	Q6A4J8|UBP7_MOUSE	83.69	2	2	2459.1	2	2	4		128475	Ubiquitin carboxyl-terminal hydrolase 7 OS=Mus musculus OX=10090 GN=Usp7 PE=1 SV=1
698	476	Q8CGC6|RBM28_MOUSE	83.6	3	3	2379.2	2	2	3		84214	RNA-binding protein 28 OS=Mus musculus OX=10090 GN=Rbm28 PE=1 SV=4
402	933	P53026|RL10A_MOUSE	83.38	7	7	86533	2	2	9		24916	60S ribosomal protein L10a OS=Mus musculus OX=10090 GN=Rpl10a PE=1 SV=3
859	1403	Q9EQH3|VPS35_MOUSE	83.3	2	2	1278.7	1	1	2		91713	Vacuolar protein sorting-associated protein 35 OS=Mus musculus OX=10090 GN=Vps35 PE=1 SV=1
897	1393	P54116|STOM_MOUSE	83.25	7	7	380.51	1	1	2		31375	Erythrocyte band 7 integral membrane protein OS=Mus musculus OX=10090 GN=Stom PE=1 SV=3
632	698	Q6PB66|LPPRC_MOUSE	83.21	2	2	372.88	2	2	4	Carbamidomethylation	156614	Leucine-rich PPR motif-containing protein mitochondrial OS=Mus musculus OX=10090 GN=Lrpprc PE=1 SV=2
766	1412	Q8BHL4|RAI3_MOUSE	82.98	4	4	2258.4	1	1	3		40101	Retinoic acid-induced protein 3 OS=Mus musculus OX=10090 GN=Gprc5a PE=1 SV=1
671	1587	P61358|RL27_MOUSE	82.88	7	7	186980	1	1	4		15798	60S ribosomal protein L27 OS=Mus musculus OX=10090 GN=Rpl27 PE=1 SV=2
972	690	Q80TM6|R3HD2_MOUSE	82.86	1	1	660.69	1	1	1		114583	R3H domain-containing protein 2 OS=Mus musculus OX=10090 GN=R3hdm2 PE=1 SV=2
470	1390	Q80XQ8|F168B_MOUSE	82.71	9	9	5931.6	1	1	7	Oxidation (M); Acetylation (Protein N-term)	20194	Myelin-associated neurite-outgrowth inhibitor OS=Mus musculus OX=10090 GN=Fam168b PE=1 SV=1
551	882	P62843|RS15_MOUSE	82.4	21	21	5559	2	2	5	Oxidation (M); Deamidation (NQ)	17040	40S ribosomal protein S15 OS=Mus musculus OX=10090 GN=Rps15 PE=1 SV=2
524	459	Q9D0I8|MRT4_MOUSE	82.19	12	12	8392.8	3	3	6		27546	mRNA turnover protein 4 homolog OS=Mus musculus OX=10090 GN=Mrto4 PE=1 SV=1
788	349	Q8BHD7|PTBP3_MOUSE	81.91	4	4	0	2	1	2		56701	Polypyrimidine tract-binding protein 3 OS=Mus musculus OX=10090 GN=Ptbp3 PE=1 SV=1
849	1060	P97315|CSRP1_MOUSE	81.85	5	5	813.23	1	1	2	Carbamidomethylation	20583	Cysteine and glycine-rich protein 1 OS=Mus musculus OX=10090 GN=Csrp1 PE=1 SV=3
673	501	Q8K2H1|PPHLN_MOUSE	81.85	8	8	766	2	2	3	Oxidation (M)	43835	Periphilin-1 OS=Mus musculus OX=10090 GN=Pphln1 PE=1 SV=1
610	493	Q148V8|FA83H_MOUSE	81.64	3	3	1023.2	2	2	4		131115	Protein FAM83H OS=Mus musculus OX=10090 GN=Fam83h PE=1 SV=1
749	884	P14602|HSPB1_MOUSE	81.57	13	13	7137.9	2	2	3		23014	Heat shock protein beta-1 OS=Mus musculus OX=10090 GN=Hspb1 PE=1 SV=3
591	1436	Q9D0T1|NH2L1_MOUSE	81.56	9	9	33777	1	1	5	Deamidation (NQ)	14174	NHP2-like protein 1 OS=Mus musculus OX=10090 GN=Snu13 PE=1 SV=4
936	552	Q60790|RASA3_MOUSE	81.52	2	2	72.739	1	1	1	Carbamidomethylation	95987	Ras GTPase-activating protein 3 OS=Mus musculus OX=10090 GN=Rasa3 PE=1 SV=2
754	909	Q8C7V3|UTP15_MOUSE	81.44	5	5	1080.3	2	2	3	Carbamidomethylation	59375	U3 small nucleolar RNA-associated protein 15 homolog OS=Mus musculus OX=10090 GN=Utp15 PE=1 SV=1
519	1240	Q6ZWV3|RL10_MOUSE	81.4	6	6	15807	1	1	6	Oxidation (M)	24604	60S ribosomal protein L10 OS=Mus musculus OX=10090 GN=Rpl10 PE=1 SV=3
1071	1397	Q8C1B7|SEP11_MOUSE	81.3	4	4	0	1	1	1		49695	Septin-11 OS=Mus musculus OX=10090 GN=Septin11 PE=1 SV=4
831	1475	Q9Z2B9|KS6A4_MOUSE	81.14	2	2	0	1	1	2		85652	Ribosomal protein S6 kinase alpha-4 OS=Mus musculus OX=10090 GN=Rps6ka4 PE=1 SV=2
677	1075	P97384|ANX11_MOUSE	81.03	2	2	872.39	1	1	3		54079	Annexin A11 OS=Mus musculus OX=10090 GN=Anxa11 PE=1 SV=2
906	1484	P67871|CSK2B_MOUSE	80.99	5	5	765.73	1	1	2	Carbamidomethylation; Deamidation (NQ)	24942	Casein kinase II subunit beta OS=Mus musculus OX=10090 GN=Csnk2b PE=1 SV=1
668	1440	Q60596|XRCC1_MOUSE	80.87	2	2	695.68	1	1	4		68971	DNA repair protein XRCC1 OS=Mus musculus OX=10090 GN=Xrcc1 PE=1 SV=2
752	896	Q99JY9|ARP3_MOUSE	80.87	6	6	3350.4	2	2	3	Carbamidomethylation	47357	Actin-related protein 3 OS=Mus musculus OX=10090 GN=Actr3 PE=1 SV=3
738	1399	P27048|RSMB_MOUSE	80.75	6	6	5341.8	1	1	3	Oxidation (M)	23656	Small nuclear ribonucleoprotein-associated protein B OS=Mus musculus OX=10090 GN=Snrpb PE=1 SV=1
738	1400	P63163|RSMN_MOUSE	80.75	6	6	5341.8	1	1	3	Oxidation (M)	24614	Small nuclear ribonucleoprotein-associated protein N OS=Mus musculus OX=10090 GN=Snrpn PE=1 SV=1
571	589	P21619|LMNB2_MOUSE	80.48	5	5	26.767	2	1	5		67318	Lamin-B2 OS=Mus musculus OX=10090 GN=Lmnb2 PE=1 SV=2
1072	1404	P23249|MOV10_MOUSE	80.45	2	2	834.21	1	1	1		113583	Putative helicase MOV-10 OS=Mus musculus OX=10090 GN=Mov10 PE=1 SV=2
563	946	P35279|RAB6A_MOUSE	80.41	12	12	557.89	2	1	5	Oxidation (M)	23590	Ras-related protein Rab-6A OS=Mus musculus OX=10090 GN=Rab6a PE=1 SV=4
719	527	Q9QXS6|DREB_MOUSE	80.4	4	4	5107.3	2	2	3		77287	Drebrin OS=Mus musculus OX=10090 GN=Dbn1 PE=1 SV=4
700	513	Q6P3Y5|Z280C_MOUSE	80.23	5	5	793.97	2	2	3	Carbamidomethylation; Deamidation (NQ)	83146	Zinc finger protein 280C OS=Mus musculus OX=10090 GN=Znf280c PE=1 SV=1
620	1101	P12382|PFKAL_MOUSE	80.19	2	2	472.64	1	1	4	Deamidation (NQ)	85360	ATP-dependent 6-phosphofructokinase liver type OS=Mus musculus OX=10090 GN=Pfkl PE=1 SV=4
620	1123	Q9WUA3|PFKAP_MOUSE	80.19	2	2	472.64	1	1	4	Deamidation (NQ)	85455	ATP-dependent 6-phosphofructokinase platelet type OS=Mus musculus OX=10090 GN=Pfkp PE=1 SV=1
661	923	P17426|AP2A1_MOUSE	80.12	2	2	1439.1	2	2	4	Carbamidomethylation	107664	AP-2 complex subunit alpha-1 OS=Mus musculus OX=10090 GN=Ap2a1 PE=1 SV=1
725	727	Q8CIE6|COPA_MOUSE	80.05	2	2	823.79	2	2	3		138432	Coatomer subunit alpha OS=Mus musculus OX=10090 GN=Copa PE=1 SV=2
680	469	P18406|CCN1_MOUSE	80	6	6	12409	2	2	3	Carbamidomethylation	41709	CCN family member 1 OS=Mus musculus OX=10090 GN=Ccn1 PE=1 SV=1
898	1402	Q9WUQ2|PREB_MOUSE	79.58	4	4	363.16	1	1	2		45437	Prolactin regulatory element-binding protein OS=Mus musculus OX=10090 GN=Preb PE=1 SV=1
446	605	O35130|NEP1_MOUSE	79.15	10	10	1572	2	2	7	Acetylation (Protein N-term)	26974	Ribosomal RNA small subunit methyltransferase NEP1 OS=Mus musculus OX=10090 GN=Emg1 PE=1 SV=1
751	892	Q8C5Q4|GRSF1_MOUSE	79.04	6	6	229.26	2	2	3	Oxidation (M)	53076	G-rich sequence factor 1 OS=Mus musculus OX=10090 GN=Grsf1 PE=1 SV=2
917	1553	P97452|BOP1_MOUSE	79.03	2	2	858.52	1	1	2		82546	Ribosome biogenesis protein BOP1 OS=Mus musculus OX=10090 GN=Bop1 PE=1 SV=1
628	584	Q9QZD9|EIF3I_MOUSE	78.99	6	6	10568	2	2	4		36461	Eukaryotic translation initiation factor 3 subunit I OS=Mus musculus OX=10090 GN=Eif3i PE=1 SV=1
796	341	O09000|NCOA3_MOUSE	78.94	2	2	397.52	2	2	2	Acetylation (Protein N-term)	151573	Nuclear receptor coactivator 3 OS=Mus musculus OX=10090 GN=Ncoa3 PE=1 SV=2
695	1405	Q925J9|MED1_MOUSE	78.91	1	1	579.65	1	1	3	Deamidation (NQ)	167140	Mediator of RNA polymerase II transcription subunit 1 OS=Mus musculus OX=10090 GN=Med1 PE=1 SV=2
846	1036	Q9DB96|NGDN_MOUSE	78.82	4	4	1317	1	1	2		35659	Neuroguidin OS=Mus musculus OX=10090 GN=Ngdn PE=1 SV=1
638	893	Q8BMD8|SCMC1_MOUSE	78.8	5	5	41909	2	2	4	Carbamidomethylation; Deamidation (NQ)	52902	Calcium-binding mitochondrial carrier protein SCaMC-1 OS=Mus musculus OX=10090 GN=Slc25a24 PE=1 SV=1
1092	1490	P62918|RL8_MOUSE	78.49	4	4	6279.2	1	1	1		28025	60S ribosomal protein L8 OS=Mus musculus OX=10090 GN=Rpl8 PE=1 SV=2
367	1537	Q6ZWV7|RL35_MOUSE	78.28	8	8	138880	1	1	10	Deamidation (NQ)	14553	60S ribosomal protein L35 OS=Mus musculus OX=10090 GN=Rpl35 PE=1 SV=1
326	1410	Q6ZWN5|RS9_MOUSE	78.25	8	8	3557.7	1	1	11		22591	40S ribosomal protein S9 OS=Mus musculus OX=10090 GN=Rps9 PE=1 SV=3
899	1409	Q9QYR6|MAP1A_MOUSE	78.25	1	1	0	1	1	2		300139	Microtubule-associated protein 1A OS=Mus musculus OX=10090 GN=Map1a PE=1 SV=2
883	920	P63087|PP1G_MOUSE	78.22	6	6	1347.1	2	1	2	Carbamidomethylation	36984	Serine/threonine-protein phosphatase PP1-gamma catalytic subunit OS=Mus musculus OX=10090 GN=Ppp1cc PE=1 SV=1
599	478	Q3UKC1|TAXB1_MOUSE	77.98	3	3	2611.2	2	2	4	Deamidation (NQ)	93630	Tax1-binding protein 1 homolog OS=Mus musculus OX=10090 GN=Tax1bp1 PE=1 SV=2
853	1106	Q6ZPV2|INO80_MOUSE	77.9	1	1	1095.1	1	1	2		176519	Chromatin-remodeling ATPase INO80 OS=Mus musculus OX=10090 GN=Ino80 PE=1 SV=2
1074	1415	Q9Z1Q9|SYVC_MOUSE	77.87	1	1	896.6	1	1	1		140215	Valine--tRNA ligase OS=Mus musculus OX=10090 GN=Vars1 PE=1 SV=1
649	1435	P03987|IGHG3_MOUSE	77.84	3	3	1530.1	1	1	4		43929	Ig gamma-3 chain C region OS=Mus musculus OX=10090 PE=1 SV=2
633	703	Q05512|MARK2_MOUSE	77.79	4	4	844.59	2	2	4		86306	Serine/threonine-protein kinase MARK2 OS=Mus musculus OX=10090 GN=Mark2 PE=1 SV=3
1073	1411	P15066|JUND_MOUSE	77.71	4	4	323.83	1	1	1		34905	Transcription factor jun-D OS=Mus musculus OX=10090 GN=Jund PE=1 SV=1
366	1455	Q9CX34|SGT1_MOUSE	77.7	4	4	0	1	1	10	Acetylation (Protein N-term)	38159	Protein SGT1 homolog OS=Mus musculus OX=10090 GN=Sugt1 PE=1 SV=3
706	723	Q9DBG3|AP2B1_MOUSE	77.64	1	1	729.52	1	1	3		104583	AP-2 complex subunit beta OS=Mus musculus OX=10090 GN=Ap2b1 PE=1 SV=1
944	699	Q14AX6|CDK12_MOUSE	77.51	1	1	115.71	1	1	1		163680	Cyclin-dependent kinase 12 OS=Mus musculus OX=10090 GN=Cdk12 PE=1 SV=2
693	924	P47962|RL5_MOUSE	77.42	7	7	1978.2	2	2	3		34401	60S ribosomal protein L5 OS=Mus musculus OX=10090 GN=Rpl5 PE=1 SV=3
887	941	Q9CXY6|ILF2_MOUSE	77.02	5	5	5869.1	2	2	2		43062	Interleukin enhancer-binding factor 2 OS=Mus musculus OX=10090 GN=Ilf2 PE=1 SV=1
721	568	Q8K301|DDX52_MOUSE	76.82	5	5	4210.6	2	2	3	Carbamidomethylation	67474	Probable ATP-dependent RNA helicase DDX52 OS=Mus musculus OX=10090 GN=Ddx52 PE=2 SV=2
662	952	Q9EQS3|MYCBP_MOUSE	76.6	20	20	3588.2	2	2	4		11970	c-Myc-binding protein OS=Mus musculus OX=10090 GN=Mycbp PE=1 SV=5
1077	1438	Q9JMD0|ZN207_MOUSE	76.31	3	3	1659.7	1	1	1		52793	BUB3-interacting and GLEBS motif-containing protein ZNF207 OS=Mus musculus OX=10090 GN=Znf207 PE=1 SV=1
1097	1519	Q62425|NDUA4_MOUSE	76.18	12	12	1848.4	1	1	1		9327	Cytochrome c oxidase subunit NDUFA4 OS=Mus musculus OX=10090 GN=Ndufa4 PE=1 SV=2
815	607	Q6PDG5|SMRC2_MOUSE	76.15	2	2	2421	2	1	2	Carbamidomethylation	132604	SWI/SNF complex subunit SMARCC2 OS=Mus musculus OX=10090 GN=Smarcc2 PE=1 SV=2
1044	1414	Q8K3Z9|PO121_MOUSE	76.11	2	2	667.43	1	1	1	Carbamidomethylation	121022	Nuclear envelope pore membrane protein POM 121 OS=Mus musculus OX=10090 GN=Pom121 PE=1 SV=2
825	1038	Q9JI13|SAS10_MOUSE	75.96	4	4	115.23	1	1	2		53399	Something about silencing protein 10 OS=Mus musculus OX=10090 GN=Utp3 PE=1 SV=1
640	978	P24369|PPIB_MOUSE	75.85	6	6	531.2	1	1	4	Deamidation (NQ)	23713	Peptidyl-prolyl cis-trans isomerase B OS=Mus musculus OX=10090 GN=Ppib PE=1 SV=2
953	553	O35129|PHB2_MOUSE	75.66	4	4	1513.6	1	1	1		33296	Prohibitin-2 OS=Mus musculus OX=10090 GN=Phb2 PE=1 SV=1
949	603	P58871|TB182_MOUSE	75.63	1	1	351.11	1	1	1	Carbamidomethylation	181824	182 kDa tankyrase-1-binding protein OS=Mus musculus OX=10090 GN=Tnks1bp1 PE=1 SV=2
572	608	Q02053|UBA1_MOUSE	75.59	2	2	352.76	2	2	5	Carbamidomethylation; Deamidation (NQ)	117809	Ubiquitin-like modifier-activating enzyme 1 OS=Mus musculus OX=10090 GN=Uba1 PE=1 SV=1
1084	1472	Q60855|RIPK1_MOUSE	75.59	2	2	1070.9	1	1	1		74854	Receptor-interacting serine/threonine-protein kinase 1 OS=Mus musculus OX=10090 GN=Ripk1 PE=1 SV=1
368	1417	Q8BHJ9|SLU7_MOUSE	75.45	3	3	0	1	1	10	Acetylation (Protein N-term)	68080	Pre-mRNA-splicing factor SLU7 OS=Mus musculus OX=10090 GN=Slu7 PE=1 SV=1
737	1296	Q8BKX1|BAIP2_MOUSE	75.25	2	2	423.99	1	1	3		59237	Brain-specific angiogenesis inhibitor 1-associated protein 2 OS=Mus musculus OX=10090 GN=Baiap2 PE=1 SV=2
611	901	P01868|IGHG1_MOUSE	74.94	9	9	5053.1	2	2	4	Oxidation (M); Deamidation (NQ)	35705	Ig gamma-1 chain C region secreted form OS=Mus musculus OX=10090 GN=Ighg1 PE=1 SV=1
611	902	P01869|IGH1M_MOUSE	74.94	7	7	5053.1	2	2	4	Oxidation (M); Deamidation (NQ)	43387	Ig gamma-1 chain C region membrane-bound form OS=Mus musculus OX=10090 GN=Ighg1 PE=1 SV=2
848	1050	P54823|DDX6_MOUSE	74.92	4	4	1734.4	1	1	2		54192	Probable ATP-dependent RNA helicase DDX6 OS=Mus musculus OX=10090 GN=Ddx6 PE=1 SV=1
722	610	Q80U70|SUZ12_MOUSE	74.85	3	3	648.49	2	2	3		83026	Polycomb protein Suz12 OS=Mus musculus OX=10090 GN=Suz12 PE=1 SV=2
259	1418	Q923D4|SF3B5_MOUSE	74.79	17	17	7380.4	1	1	14	Oxidation (M); Deamidation (NQ)	10119	Splicing factor 3B subunit 5 OS=Mus musculus OX=10090 GN=Sf3b5 PE=1 SV=1
536	508	P09450|JUNB_MOUSE	74.54	12	12	2192.5	2	2	5	Deamidation (NQ)	35765	Transcription factor jun-B OS=Mus musculus OX=10090 GN=Junb PE=1 SV=1
900	1422	Q7TQK4|EXOS3_MOUSE	74.52	5	5	1635.6	1	1	2	Carbamidomethylation; Acetylation (Protein N-term)	29546	Exosome complex component RRP40 OS=Mus musculus OX=10090 GN=Exosc3 PE=1 SV=3
913	1539	P62320|SMD3_MOUSE	74.43	8	8	4047.9	1	1	2		13916	Small nuclear ribonucleoprotein Sm D3 OS=Mus musculus OX=10090 GN=Snrpd3 PE=1 SV=1
1045	1430	Q62186|SSRD_MOUSE	74.27	8	8	262.86	1	1	1		18937	Translocon-associated protein subunit delta OS=Mus musculus OX=10090 GN=Ssr4 PE=1 SV=1
616	477	Q6PAC3|DCA13_MOUSE	74.21	7	7	4178.7	3	3	4	Carbamidomethylation	51456	DDB1- and CUL4-associated factor 13 OS=Mus musculus OX=10090 GN=Dcaf13 PE=2 SV=2
705	702	Q9CZJ1|UTP11_MOUSE	74.06	7	7	2865.2	2	2	3		30551	Probable U3 small nucleolar RNA-associated protein 11 OS=Mus musculus OX=10090 GN=Utp11 PE=2 SV=1
768	1445	Q62241|RU1C_MOUSE	74.03	8	8	172.55	1	1	3	Oxidation (M)	17364	U1 small nuclear ribonucleoprotein C OS=Mus musculus OX=10090 GN=Snrpc PE=1 SV=1
724	678	Q61687|ATRX_MOUSE	74.03	1	1	1170.4	2	2	3		278585	Transcriptional regulator ATRX OS=Mus musculus OX=10090 GN=Atrx PE=1 SV=3
822	973	Q3UFY0|RRP36_MOUSE	73.88	6	6	308.49	1	1	2		28589	Ribosomal RNA processing protein 36 homolog OS=Mus musculus OX=10090 GN=Rrp36 PE=1 SV=1
505	1585	P62245|RS15A_MOUSE	73.64	7	7	18724	1	1	6	Deamidation (NQ)	14840	40S ribosomal protein S15a OS=Mus musculus OX=10090 GN=Rps15a PE=1 SV=2
687	473	Q922Q8|LRC59_MOUSE	73.33	7	7	32991	2	2	3	Carbamidomethylation	34877	Leucine-rich repeat-containing protein 59 OS=Mus musculus OX=10090 GN=Lrrc59 PE=1 SV=1
618	571	Q8K019|BCLF1_MOUSE	72.92	1	1	70.581	1	1	4		106002	Bcl-2-associated transcription factor 1 OS=Mus musculus OX=10090 GN=Bclaf1 PE=1 SV=2
850	1068	Q60960|IMA5_MOUSE	72.75	4	4	378.62	1	1	2		60183	Importin subunit alpha-5 OS=Mus musculus OX=10090 GN=Kpna1 PE=1 SV=2
235	971	Q9D211|C2AIL_MOUSE	72.68	10	10	138.74	1	1	16	Oxidation (M); Acetylation (Protein N-term)	13209	CDKN2AIP N-terminal-like protein OS=Mus musculus OX=10090 GN=Cdkn2aipnl PE=3 SV=1
834	625	P70279|SURF6_MOUSE	72.64	5	5	1488.6	2	2	2		41235	Surfeit locus protein 6 OS=Mus musculus OX=10090 GN=Surf6 PE=1 SV=1
1075	1424	Q9DAA6|EXOS1_MOUSE	72.62	8	8	961.31	1	1	1	Carbamidomethylation	21424	Exosome complex component CSL4 OS=Mus musculus OX=10090 GN=Exosc1 PE=1 SV=1
758	937	O54833|CSK22_MOUSE	72.6	8	8	66.835	2	2	3	Carbamidomethylation	41215	Casein kinase II subunit alpha' OS=Mus musculus OX=10090 GN=Csnk2a2 PE=1 SV=1
393	1551	P62301|RS13_MOUSE	72.54	7	7	79503	1	1	9	Deamidation (NQ)	17222	40S ribosomal protein S13 OS=Mus musculus OX=10090 GN=Rps13 PE=1 SV=2
911	1530	Q9D0G0|RT30_MOUSE	72.53	2	2	440.34	1	1	2		49939	28S ribosomal protein S30 mitochondrial OS=Mus musculus OX=10090 GN=Mrps30 PE=1 SV=1
787	1426	P23242|CXA1_MOUSE	72.51	4	4	1384.8	1	1	2		43004	Gap junction alpha-1 protein OS=Mus musculus OX=10090 GN=Gja1 PE=1 SV=2
805	1074	Q9R002|IFI2_MOUSE	72.49	4	4	472.11	1	1	2	Carbamidomethylation	50466	Interferon-activable protein 202 OS=Mus musculus OX=10090 GN=Ifi202 PE=1 SV=3
1076	1425	Q8BHC7|RHBL4_MOUSE	72.41	5	5	196.3	1	1	1		35776	Rhomboid-related protein 4 OS=Mus musculus OX=10090 GN=Rhbdd1 PE=1 SV=1
711	1006	Q3UB74|TBRG1_MOUSE	72.35	3	3	787.43	1	1	3	Acetylation (Protein N-term)	44881	Transforming growth factor beta regulator 1 OS=Mus musculus OX=10090 GN=Tbrg1 PE=1 SV=2
901	1427	Q6NV83|SR140_MOUSE	72.05	2	2	131.03	1	1	2		118261	U2 snRNP-associated SURP motif-containing protein OS=Mus musculus OX=10090 GN=U2surp PE=1 SV=3
530	1433	Q8CJ67|STAU2_MOUSE	71.86	2	2	485.68	1	1	6		62535	Double-stranded RNA-binding protein Staufen homolog 2 OS=Mus musculus OX=10090 GN=Stau2 PE=1 SV=1
439	1428	P31230|AIMP1_MOUSE	71.77	10	10	423.08	1	1	8	Carbamidomethylation; Deamidation (NQ)	33997	Aminoacyl tRNA synthase complex-interacting multifunctional protein 1 OS=Mus musculus OX=10090 GN=Aimp1 PE=1 SV=2
590	1429	Q6PGL7|WASC2_MOUSE	71.71	1	1	1071.2	1	1	5		145310	WASH complex subunit 2 OS=Mus musculus OX=10090 GN=Washc2 PE=1 SV=1
818	791	Q64727|VINC_MOUSE	71.6	1	1	218.9	1	1	2		116717	Vinculin OS=Mus musculus OX=10090 GN=Vcl PE=1 SV=4
854	1110	Q3TJD7|PDLI7_MOUSE	71.36	2	2	1863.9	1	1	2		50119	PDZ and LIM domain protein 7 OS=Mus musculus OX=10090 GN=Pdlim7 PE=1 SV=1
903	1450	P35278|RAB5C_MOUSE	71.36	6	6	0	1	1	2		23412	Ras-related protein Rab-5C OS=Mus musculus OX=10090 GN=Rab5c PE=1 SV=2
646	1247	O54946|DNJB6_MOUSE	71.31	5	5	173.68	1	1	4	Carbamidomethylation; Deamidation (NQ)	39807	DnaJ homolog subfamily B member 6 OS=Mus musculus OX=10090 GN=Dnajb6 PE=1 SV=4
845	1029	Q91VD9|NDUS1_MOUSE	71.3	2	2	682.52	1	1	2		79777	NADH-ubiquinone oxidoreductase 75 kDa subunit mitochondrial OS=Mus musculus OX=10090 GN=Ndufs1 PE=1 SV=2
885	929	P62874|GBB1_MOUSE	71.02	6	6	1847.1	2	1	2	Carbamidomethylation	37377	Guanine nucleotide-binding protein G(I)/G(S)/G(T) subunit beta-1 OS=Mus musculus OX=10090 GN=Gnb1 PE=1 SV=3
902	1431	Q61166|MARE1_MOUSE	70.94	6	6	273.47	1	1	2	Acetylation (Protein N-term)	30016	Microtubule-associated protein RP/EB family member 1 OS=Mus musculus OX=10090 GN=Mapre1 PE=1 SV=3
648	1434	Q8BIG4|FBX28_MOUSE	70.88	4	4	768.75	1	1	4	Deamidation (NQ)	40978	F-box only protein 28 OS=Mus musculus OX=10090 GN=Fbxo28 PE=1 SV=1
667	1437	O70251|EF1B_MOUSE	70.74	6	6	314.52	1	1	4		24694	Elongation factor 1-beta OS=Mus musculus OX=10090 GN=Eef1b PE=1 SV=5
647	1432	P01843|LAC1_MOUSE	70.58	16	16	187.18	1	1	4		11575	Ig lambda-1 chain C region OS=Mus musculus OX=10090 PE=1 SV=1
699	479	P05064|ALDOA_MOUSE	70.53	7	7	4695	2	2	3	Carbamidomethylation	39356	Fructose-bisphosphate aldolase A OS=Mus musculus OX=10090 GN=Aldoa PE=1 SV=2
781	384	Q8R4U7|LUZP1_MOUSE	70.39	2	2	6082.8	2	2	2		119311	Leucine zipper protein 1 OS=Mus musculus OX=10090 GN=Luzp1 PE=1 SV=2
769	1446	P28798|GRN_MOUSE	70.21	2	2	756.24	1	1	3	Carbamidomethylation	63458	Progranulin OS=Mus musculus OX=10090 GN=Grn PE=1 SV=2
463	913	Q05144|RAC2_MOUSE	70.08	11	11	1071.5	2	1	7	Carbamidomethylation	21441	Ras-related C3 botulinum toxin substrate 2 OS=Mus musculus OX=10090 GN=Rac2 PE=1 SV=1
463	914	P60764|RAC3_MOUSE	70.08	11	11	1071.5	2	1	7	Carbamidomethylation	21379	Ras-related C3 botulinum toxin substrate 3 OS=Mus musculus OX=10090 GN=Rac3 PE=1 SV=1
463	915	P63001|RAC1_MOUSE	70.08	11	11	1071.5	2	1	7	Carbamidomethylation	21450	Ras-related C3 botulinum toxin substrate 1 OS=Mus musculus OX=10090 GN=Rac1 PE=1 SV=1
907	1512	Q8VBV3|EXOS2_MOUSE	70.03	4	4	1256.5	1	1	2		32632	Exosome complex component RRP4 OS=Mus musculus OX=10090 GN=Exosc2 PE=1 SV=1
1112	1572	Q99L45|IF2B_MOUSE	69.99	3	3	3007.3	1	1	1		38092	Eukaryotic translation initiation factor 2 subunit 2 OS=Mus musculus OX=10090 GN=Eif2s2 PE=1 SV=1
650	1449	Q9WTX5|SKP1_MOUSE	69.98	7	7	1584.8	1	1	4	Deamidation (NQ)	18672	S-phase kinase-associated protein 1 OS=Mus musculus OX=10090 GN=Skp1 PE=1 SV=3
602	361	Q8K1N2|PHLB2_MOUSE	69.71	2	2	400.5	2	2	4		141485	Pleckstrin homology-like domain family B member 2 OS=Mus musculus OX=10090 GN=Phldb2 PE=1 SV=2
812	572	Q922D8|C1TC_MOUSE	69.18	3	3	972.47	2	2	2		101200	C-1-tetrahydrofolate synthase cytoplasmic OS=Mus musculus OX=10090 GN=Mthfd1 PE=1 SV=4
784	609	Q6ZQ58|LARP1_MOUSE	68.8	3	3	2218	2	2	2		121125	La-related protein 1 OS=Mus musculus OX=10090 GN=Larp1 PE=1 SV=3
904	1477	P61089|UBE2N_MOUSE	68.62	7	7	921.04	1	1	2		17138	Ubiquitin-conjugating enzyme E2 N OS=Mus musculus OX=10090 GN=Ube2n PE=1 SV=1
670	1448	P47738|ALDH2_MOUSE	68.33	3	3	516.67	1	1	4		56538	Aldehyde dehydrogenase mitochondrial OS=Mus musculus OX=10090 GN=Aldh2 PE=1 SV=1
841	965	P61982|1433G_MOUSE	68.32	6	6	5357.5	1	1	2		28303	14-3-3 protein gamma OS=Mus musculus OX=10090 GN=Ywhag PE=1 SV=2
403	1457	P63085|MK01_MOUSE	68.23	3	3	325.66	1	1	9	Oxidation (M); Acetylation (Protein N-term)	41276	Mitogen-activated protein kinase 1 OS=Mus musculus OX=10090 GN=Mapk1 PE=1 SV=3
471	1442	Q3UWW6|GA2L3_MOUSE	68.06	3	3	112.9	1	1	7	Carbamidomethylation	74235	GAS2-like protein 3 OS=Mus musculus OX=10090 GN=Gas2l3 PE=1 SV=1
785	490	P80318|TCPG_MOUSE	68.06	2	2	1436.2	1	1	2	Carbamidomethylation; Deamidation (NQ)	60630	T-complex protein 1 subunit gamma OS=Mus musculus OX=10090 GN=Cct3 PE=1 SV=1
592	1441	P70182|PI51A_MOUSE	68.05	5	5	439.09	1	1	5	Acetylation (Protein N-term)	60485	Phosphatidylinositol 4-phosphate 5-kinase type-1 alpha OS=Mus musculus OX=10090 GN=Pip5k1a PE=1 SV=2
855	1128	O70435|PSA3_MOUSE	68.03	7	7	0	1	1	2	Acetylation (Protein N-term)	28405	Proteasome subunit alpha type-3 OS=Mus musculus OX=10090 GN=Psma3 PE=1 SV=3
755	921	P23198|CBX3_MOUSE	68	14	14	1261.8	2	2	3	Carbamidomethylation	20855	Chromobox protein homolog 3 OS=Mus musculus OX=10090 GN=Cbx3 PE=1 SV=2
552	922	P84096|RHOG_MOUSE	67.98	13	13	739.2	2	1	5	Carbamidomethylation	21308	Rho-related GTP-binding protein RhoG OS=Mus musculus OX=10090 GN=Rhog PE=1 SV=1
800	518	Q3V1V3|ESF1_MOUSE	67.79	4	4	132.46	2	2	2	Carbamidomethylation	98048	ESF1 homolog OS=Mus musculus OX=10090 GN=Esf1 PE=1 SV=1
864	1571	P68040|RACK1_MOUSE	67.71	3	3	2719.5	1	1	2		35077	Receptor of activated protein C kinase 1 OS=Mus musculus OX=10090 GN=Rack1 PE=1 SV=3
1078	1456	Q9D287|SPF27_MOUSE	67.67	5	5	1259.6	1	1	1		26131	Pre-mRNA-splicing factor SPF27 OS=Mus musculus OX=10090 GN=Bcas2 PE=1 SV=1
729	940	Q9DCE5|PK1IP_MOUSE	67.64	7	7	173.08	2	2	3	Carbamidomethylation; Deamidation (NQ)	42116	p21-activated protein kinase-interacting protein 1 OS=Mus musculus OX=10090 GN=Pak1ip1 PE=1 SV=2
770	1452	Q6P9Q6|FKB15_MOUSE	67.26	1	1	0	1	1	3		132961	FK506-binding protein 15 OS=Mus musculus OX=10090 GN=Fkbp15 PE=1 SV=2
718	502	Q8K2J0|PLCD3_MOUSE	67.25	4	4	0	2	2	3	Carbamidomethylation	88607	1-phosphatidylinositol 4 5-bisphosphate phosphodiesterase delta-3 OS=Mus musculus OX=10090 GN=Plcd3 PE=1 SV=2
886	936	Q8JZQ9|EIF3B_MOUSE	67.12	5	5	384.93	2	2	2		91370	Eukaryotic translation initiation factor 3 subunit B OS=Mus musculus OX=10090 GN=Eif3b PE=1 SV=1
434	1447	Q5SSK3|TEFM_MOUSE	67.09	4	4	2435.4	1	1	8	Carbamidomethylation; Deamidation (NQ)	41874	Transcription elongation factor mitochondrial OS=Mus musculus OX=10090 GN=Tefm PE=1 SV=1
517	945	P17742|PPIA_MOUSE	66.66	13	13	4988.7	2	2	6	Carbamidomethylation; Oxidation (M)	17971	Peptidyl-prolyl cis-trans isomerase A OS=Mus musculus OX=10090 GN=Ppia PE=1 SV=2
581	1480	P62267|RS23_MOUSE	66.53	8	8	518.2	1	1	5		15808	40S ribosomal protein S23 OS=Mus musculus OX=10090 GN=Rps23 PE=1 SV=3
1011	1073	O35704|SPTC1_MOUSE	66.52	3	3	615.54	1	1	1		52535	Serine palmitoyltransferase 1 OS=Mus musculus OX=10090 GN=Sptlc1 PE=1 SV=2
1022	1115	Q9CZX5|PINX1_MOUSE	66.46	6	6	710.98	1	1	1		37221	PIN2/TERF1-interacting telomerase inhibitor 1 OS=Mus musculus OX=10090 GN=Pinx1 PE=1 SV=2
504	972	Q9CPS7|PNO1_MOUSE	66.37	7	7	2016.2	1	1	6	Oxidation (M); Acetylation (Protein N-term)	27454	RNA-binding protein PNO1 OS=Mus musculus OX=10090 GN=Pno1 PE=1 SV=1
645	1130	Q9D880|TIM50_MOUSE	65.72	3	3	541.05	1	1	4		39776	Mitochondrial import inner membrane translocase subunit TIM50 OS=Mus musculus OX=10090 GN=Timm50 PE=1 SV=1
1046	1454	Q9CQ75|NDUA2_MOUSE	65.35	14	14	628.42	1	1	1		10916	NADH dehydrogenase [ubiquinone] 1 alpha subcomplex subunit 2 OS=Mus musculus OX=10090 GN=Ndufa2 PE=1 SV=3
702	613	Q8CGC7|SYEP_MOUSE	65.33	1	1	550.62	1	1	3		170078	Bifunctional glutamate/proline--tRNA ligase OS=Mus musculus OX=10090 GN=Eprs1 PE=1 SV=4
603	512	Q9DBR1|XRN2_MOUSE	65.27	1	1	1896.8	1	1	4	Carbamidomethylation	108687	5'-3' exoribonuclease 2 OS=Mus musculus OX=10090 GN=Xrn2 PE=1 SV=1
643	1111	P80316|TCPE_MOUSE	65.14	2	2	640.32	1	1	4		59624	T-complex protein 1 subunit epsilon OS=Mus musculus OX=10090 GN=Cct5 PE=1 SV=1
771	1486	Q8R2N2|UTP4_MOUSE	65.11	2	2	983.73	1	1	3	Carbamidomethylation	76909	U3 small nucleolar RNA-associated protein 4 homolog OS=Mus musculus OX=10090 GN=Utp4 PE=2 SV=3
1018	1095	Q3TIV5|ZC3HF_MOUSE	64.83	3	3	274.11	1	1	1		48327	Zinc finger CCCH domain-containing protein 15 OS=Mus musculus OX=10090 GN=Zc3h15 PE=1 SV=2
537	694	Q3TX08|TRM1_MOUSE	64.65	2	2	512.89	1	1	5	Carbamidomethylation	72350	tRNA (guanine(26)-N(2))-dimethyltransferase OS=Mus musculus OX=10090 GN=Trmt1 PE=1 SV=2
1019	1098	P05202|AATM_MOUSE	64.58	3	3	380.6	1	1	1		47411	Aspartate aminotransferase mitochondrial OS=Mus musculus OX=10090 GN=Got2 PE=1 SV=1
1089	1483	O09106|HDAC1_MOUSE	64.21	2	2	448.55	1	1	1		55075	Histone deacetylase 1 OS=Mus musculus OX=10090 GN=Hdac1 PE=1 SV=1
1089	1485	P70288|HDAC2_MOUSE	64.21	2	2	448.55	1	1	1		55302	Histone deacetylase 2 OS=Mus musculus OX=10090 GN=Hdac2 PE=1 SV=1
559	724	Q5F2E8|TAOK1_MOUSE	64.21	1	1	0	1	1	5		116050	Serine/threonine-protein kinase TAO1 OS=Mus musculus OX=10090 GN=Taok1 PE=1 SV=1
472	1458	Q9CY21|BUD23_MOUSE	64.17	7	7	709.13	1	1	7		31587	Probable 18S rRNA (guanine-N(7))-methyltransferase OS=Mus musculus OX=10090 GN=Bud23 PE=1 SV=1
1020	1102	P63028|TCTP_MOUSE	64.11	8	8	991.93	1	1	1	Carbamidomethylation	19462	Translationally-controlled tumor protein OS=Mus musculus OX=10090 GN=Tpt1 PE=1 SV=1
860	1459	Q8BSL7|ARF2_MOUSE	64.08	8	8	1989.2	1	1	2	Oxidation (M)	20746	ADP-ribosylation factor 2 OS=Mus musculus OX=10090 GN=Arf2 PE=1 SV=2
860	1460	P61205|ARF3_MOUSE	64.08	8	8	1989.2	1	1	2	Oxidation (M)	20601	ADP-ribosylation factor 3 OS=Mus musculus OX=10090 GN=Arf3 PE=2 SV=2
860	1461	P84078|ARF1_MOUSE	64.08	8	8	1989.2	1	1	2	Oxidation (M)	20697	ADP-ribosylation factor 1 OS=Mus musculus OX=10090 GN=Arf1 PE=1 SV=2
1079	1462	Q9Z2U0|PSA7_MOUSE	63.99	6	6	96.555	1	1	1		27855	Proteasome subunit alpha type-7 OS=Mus musculus OX=10090 GN=Psma7 PE=1 SV=1
791	582	Q497V5|SRBD1_MOUSE	63.96	2	2	642.74	2	2	2	Carbamidomethylation	110281	S1 RNA-binding domain-containing protein 1 OS=Mus musculus OX=10090 GN=Srbd1 PE=2 SV=3
1085	1473	Q9DCX2|ATP5H_MOUSE	63.95	7	7	0	1	1	1	Carbamidomethylation	18749	ATP synthase subunit d mitochondrial OS=Mus musculus OX=10090 GN=Atp5pd PE=1 SV=3
1081	1464	O08715|AKAP1_MOUSE	63.9	2	2	624.06	1	1	1	Carbamidomethylation	92195	A-kinase anchor protein 1 mitochondrial OS=Mus musculus OX=10090 GN=Akap1 PE=1 SV=4
734	1234	Q01320|TOP2A_MOUSE	63.89	1	1	1167.2	1	1	3	Carbamidomethylation	172789	DNA topoisomerase 2-alpha OS=Mus musculus OX=10090 GN=Top2a PE=1 SV=2
1080	1463	Q3U182|CRTC2_MOUSE	63.84	3	3	0	1	1	1	Acetylation (Protein N-term); Deamidation (NQ)	73216	CREB-regulated transcription coactivator 2 OS=Mus musculus OX=10090 GN=Crtc2 PE=1 SV=2
772	1487	P62889|RL30_MOUSE	63.74	10	10	7818.4	1	1	3	Oxidation (M)	12784	60S ribosomal protein L30 OS=Mus musculus OX=10090 GN=Rpl30 PE=1 SV=2
1082	1465	Q9CWT6|DDX28_MOUSE	63.65	3	3	126.14	1	1	1		59515	Probable ATP-dependent RNA helicase DDX28 OS=Mus musculus OX=10090 GN=Ddx28 PE=2 SV=2
731	1108	Q99JR8|SMRD2_MOUSE	63.36	2	2	709.74	1	1	3		59085	SWI/SNF-related matrix-associated actin-dependent regulator of chromatin subfamily D member 2 OS=Mus musculus OX=10090 GN=Smarcd2 PE=1 SV=2
651	1471	Q31125|S39A7_MOUSE	63.36	3	3	17902	1	1	4		50657	Zinc transporter SLC39A7 OS=Mus musculus OX=10090 GN=Slc39a7 PE=1 SV=2
713	1601	Q9CY66|GAR1_MOUSE	63.25	4	4	41963	1	1	3		23474	H/ACA ribonucleoprotein complex subunit 1 OS=Mus musculus OX=10090 GN=Gar1 PE=1 SV=1
862	1510	Q61686|CBX5_MOUSE	63.18	6	6	133.03	1	1	2		22186	Chromobox protein homolog 5 OS=Mus musculus OX=10090 GN=Cbx5 PE=1 SV=1
811	517	Q99JX7|NXF1_MOUSE	63.13	2	2	1620.5	1	1	2		70300	Nuclear RNA export factor 1 OS=Mus musculus OX=10090 GN=Nxf1 PE=1 SV=3
1083	1470	Q9JJZ6|KLF13_MOUSE	63.04	6	6	83.306	1	1	1		31136	Krueppel-like factor 13 OS=Mus musculus OX=10090 GN=Klf13 PE=1 SV=2
842	982	Q99P88|NU155_MOUSE	62.95	1	1	515.22	1	1	2	Carbamidomethylation	155117	Nuclear pore complex protein Nup155 OS=Mus musculus OX=10090 GN=Nup155 PE=1 SV=1
1109	1559	Q9DCJ7|AKIP_MOUSE	62.9	5	5	3903.9	1	1	1		23300	Aurora kinase A-interacting protein OS=Mus musculus OX=10090 GN=Aurkaip1 PE=2 SV=2
1006	1027	Q9D8N0|EF1G_MOUSE	62.81	3	3	2334.2	1	1	1	Acetylation (Protein N-term)	50061	Elongation factor 1-gamma OS=Mus musculus OX=10090 GN=Eef1g PE=1 SV=3
840	953	Q9Z103|ADNP_MOUSE	62.76	3	3	137.28	2	2	2		124308	Activity-dependent neuroprotector homeobox protein OS=Mus musculus OX=10090 GN=Adnp PE=1 SV=2
679	463	O70194|EIF3D_MOUSE	62.6	8	8	2304.2	3	3	3		63989	Eukaryotic translation initiation factor 3 subunit D OS=Mus musculus OX=10090 GN=Eif3d PE=1 SV=2
905	1482	Q9CQS2|NOP10_MOUSE	62.38	17	17	521.81	1	1	2	Oxidation (M)	7706	H/ACA ribonucleoprotein complex subunit 3 OS=Mus musculus OX=10090 GN=Nop10 PE=3 SV=1
1087	1479	Q91WN1|DNJC9_MOUSE	62.35	5	5	2357.8	1	1	1		30059	DnaJ homolog subfamily C member 9 OS=Mus musculus OX=10090 GN=Dnajc9 PE=1 SV=2
1088	1481	Q9JLJ5|ELOV1_MOUSE	62.34	4	4	0	1	1	1	Deamidation (NQ)	32678	Elongation of very long chain fatty acids protein 1 OS=Mus musculus OX=10090 GN=Elovl1 PE=1 SV=1
1095	1499	Q9CQ49|NCBP2_MOUSE	62.26	7	7	2263	1	1	1		18017	Nuclear cap-binding protein subunit 2 OS=Mus musculus OX=10090 GN=Ncbp2 PE=1 SV=1
992	1532	P70314|PITX1_MOUSE	62.25	3	3	1145.6	1	1	1	Carbamidomethylation	34075	Pituitary homeobox 1 OS=Mus musculus OX=10090 GN=Pitx1 PE=2 SV=2
992	1533	P97474|PITX2_MOUSE	62.25	3	3	1145.6	1	1	1	Carbamidomethylation	35321	Pituitary homeobox 2 OS=Mus musculus OX=10090 GN=Pitx2 PE=1 SV=2
730	1082	Q5SXY1|CYTSB_MOUSE	62.16	1	1	0	1	1	3		118101	Cytospin-B OS=Mus musculus OX=10090 GN=Specc1 PE=1 SV=2
943	601	P11276|FINC_MOUSE	62.08	1	1	1169.6	1	1	1		272536	Fibronectin OS=Mus musculus OX=10090 GN=Fn1 PE=1 SV=4
912	1536	Q9JKP5|MBNL1_MOUSE	62.02	3	3	12571	1	1	2	Acetylation (Protein N-term)	36976	Muscleblind-like protein 1 OS=Mus musculus OX=10090 GN=Mbnl1 PE=1 SV=1
851	1077	Q3UPF5|ZCCHV_MOUSE	61.76	1	1	5568.1	1	1	2		106687	Zinc finger CCCH-type antiviral protein 1 OS=Mus musculus OX=10090 GN=Zc3hav1 PE=1 SV=1
926	1620	Q3TWW8|SRSF6_MOUSE	61.73	3	3	847.76	1	1	2		39025	Serine/arginine-rich splicing factor 6 OS=Mus musculus OX=10090 GN=Srsf6 PE=1 SV=1
790	532	Q8BY02|NKRF_MOUSE	61.61	3	3	765.7	2	2	2		77739	NF-kappa-B-repressing factor OS=Mus musculus OX=10090 GN=Nkrf PE=2 SV=3
861	1478	Q9CXF4|TBC15_MOUSE	61.37	2	2	130.73	1	1	2	Deamidation (NQ)	76527	TBC1 domain family member 15 OS=Mus musculus OX=10090 GN=Tbc1d15 PE=1 SV=1
231	1534	Q9JJI8|RL38_MOUSE	61.34	14	14	37436	1	1	16		8204	60S ribosomal protein L38 OS=Mus musculus OX=10090 GN=Rpl38 PE=1 SV=3
971	668	Q8BMQ2|TF3C4_MOUSE	61.07	1	1	0	1	1	1	Acetylation (Protein N-term)	91613	General transcription factor 3C polypeptide 4 OS=Mus musculus OX=10090 GN=Gtf3c4 PE=1 SV=2
828	1150	O70373|XIRP1_MOUSE	61.05	1	1	0	1	1	2		123431	Xin actin-binding repeat-containing protein 1 OS=Mus musculus OX=10090 GN=Xirp1 PE=1 SV=2
1090	1488	P01636|KV5A4_MOUSE	61.01	12	12	0	1	1	1		12030	Ig kappa chain V-V region MOPC 149 OS=Mus musculus OX=10090 PE=1 SV=1
1091	1489	O89079|COPE_MOUSE	60.89	6	6	94.74	1	1	1	Carbamidomethylation	34567	Coatomer subunit epsilon OS=Mus musculus OX=10090 GN=Cope PE=1 SV=3
867	1598	P62082|RS7_MOUSE	60.77	5	5	19629	1	1	2		22127	40S ribosomal protein S7 OS=Mus musculus OX=10090 GN=Rps7 PE=2 SV=1
1096	1515	Q9ET54|PALLD_MOUSE	60.58	1	1	0	1	1	1		152131	Palladin OS=Mus musculus OX=10090 GN=Palld PE=1 SV=2
774	1518	P40124|CAP1_MOUSE	60.55	3	3	325.04	1	1	3	Oxidation (M)	51565	Adenylyl cyclase-associated protein 1 OS=Mus musculus OX=10090 GN=Cap1 PE=1 SV=4
773	1492	Q91W90|TXND5_MOUSE	60.29	4	4	433.63	1	1	3	Carbamidomethylation	46416	Thioredoxin domain-containing protein 5 OS=Mus musculus OX=10090 GN=Txndc5 PE=1 SV=2
1093	1493	Q8BHS6|ARMX3_MOUSE	60.21	4	4	345.89	1	1	1		42620	Armadillo repeat-containing X-linked protein 3 OS=Mus musculus OX=10090 GN=Armcx3 PE=1 SV=1
1100	1527	Q91YQ5|RPN1_MOUSE	60.05	2	2	1334.2	1	1	1		68528	Dolichyl-diphosphooligosaccharide--protein glycosyltransferase subunit 1 OS=Mus musculus OX=10090 GN=Rpn1 PE=1 SV=1
1094	1494	P01635|KV5A3_MOUSE	60	11	11	1002.2	1	1	1		12581	Ig kappa chain V-V region K2 (Fragment) OS=Mus musculus OX=10090 PE=1 SV=1
888	955	Q05186|RCN1_MOUSE	59.88	8	8	44639	2	2	2		38113	Reticulocalbin-1 OS=Mus musculus OX=10090 GN=Rcn1 PE=1 SV=1
1013	1081	Q61749|EI2BD_MOUSE	59.84	3	3	309.74	1	1	1		57624	Translation initiation factor eIF-2B subunit delta OS=Mus musculus OX=10090 GN=Eif2b4 PE=1 SV=2
908	1517	Q60715|P4HA1_MOUSE	59.57	3	3	698.22	1	1	2		60910	Prolyl 4-hydroxylase subunit alpha-1 OS=Mus musculus OX=10090 GN=P4ha1 PE=1 SV=2
1048	1538	Q9DBZ5|EIF3K_MOUSE	59.35	5	5	2321.9	1	1	1		25087	Eukaryotic translation initiation factor 3 subunit K OS=Mus musculus OX=10090 GN=Eif3k PE=1 SV=1
863	1558	Q99LL5|PWP1_MOUSE	59.23	2	2	1379.5	1	1	2	Carbamidomethylation	55587	Periodic tryptophan protein 1 homolog OS=Mus musculus OX=10090 GN=Pwp1 PE=1 SV=1
1016	1087	Q8VHE0|SEC63_MOUSE	59.13	1	1	633.57	1	1	1		87870	Translocation protein SEC63 homolog OS=Mus musculus OX=10090 GN=Sec63 PE=1 SV=4
1105	1544	Q9CY50|SSRA_MOUSE	58.84	4	4	763.43	1	1	1		32065	Translocon-associated protein subunit alpha OS=Mus musculus OX=10090 GN=Ssr1 PE=1 SV=1
1047	1520	Q9DCT6|BAP18_MOUSE	58.68	9	9	0	1	1	1		17996	Chromatin complexes subunit BAP18 OS=Mus musculus OX=10090 GN=Bap18 PE=1 SV=1
684	522	Q62187|TTF1_MOUSE	58.62	2	2	4897.4	1	1	3		97723	Transcription termination factor 1 OS=Mus musculus OX=10090 GN=Ttf1 PE=1 SV=2
1017	1088	Q6PAM1|TXLNA_MOUSE	58.57	3	3	124.75	1	1	1		62369	Alpha-taxilin OS=Mus musculus OX=10090 GN=Txlna PE=1 SV=1
549	554	P14211|CALR_MOUSE	58.38	3	3	1315.9	1	1	5		47995	Calreticulin OS=Mus musculus OX=10090 GN=Calr PE=1 SV=1
594	1586	P62855|RS26_MOUSE	58.31	8	8	34821	1	1	5		13015	40S ribosomal protein S26 OS=Mus musculus OX=10090 GN=Rps26 PE=1 SV=3
606	1521	Q9D1I6|RM14_MOUSE	58.3	13	13	374.61	1	1	4	Deamidation (NQ)	15874	39S ribosomal protein L14 mitochondrial OS=Mus musculus OX=10090 GN=Mrpl14 PE=1 SV=1
775	1522	Q9DB15|RM12_MOUSE	58.07	7	7	210.51	1	1	3		21708	39S ribosomal protein L12 mitochondrial OS=Mus musculus OX=10090 GN=Mrpl12 PE=1 SV=2
821	967	P84091|AP2M1_MOUSE	58.01	2	2	2010.8	1	1	2		49655	AP-2 complex subunit mu OS=Mus musculus OX=10090 GN=Ap2m1 PE=1 SV=1
909	1523	Q9Z1N2|ORC1_MOUSE	57.99	2	2	2504.7	1	1	2		95103	Origin recognition complex subunit 1 OS=Mus musculus OX=10090 GN=Orc1 PE=1 SV=2
1033	1232	Q6NZN0|RBM26_MOUSE	57.92	1	1	0	1	1	1		114143	RNA-binding protein 26 OS=Mus musculus OX=10090 GN=Rbm26 PE=1 SV=2
979	983	Q7TPM1|PRC2B_MOUSE	57.83	1	1	181.67	1	1	1		160913	Protein PRRC2B OS=Mus musculus OX=10090 GN=Prrc2b PE=1 SV=1
1098	1524	Q61655|DD19A_MOUSE	57.82	4	4	0	1	1	1	Acetylation (Protein N-term)	53933	ATP-dependent RNA helicase DDX19A OS=Mus musculus OX=10090 GN=Ddx19a PE=1 SV=2
1099	1526	Q9CXG3|PPIL4_MOUSE	57.8	3	3	277.89	1	1	1		57230	Peptidyl-prolyl cis-trans isomerase-like 4 OS=Mus musculus OX=10090 GN=Ppil4 PE=1 SV=2
1003	968	Q9CR51|VATG1_MOUSE	57.79	13	13	123.66	1	1	1	Acetylation (Protein N-term)	13724	V-type proton ATPase subunit G 1 OS=Mus musculus OX=10090 GN=Atp6v1g1 PE=1 SV=3
1103	1540	P70168|IMB1_MOUSE	57.76	1	1	2564.3	1	1	1		97184	Importin subunit beta-1 OS=Mus musculus OX=10090 GN=Kpnb1 PE=1 SV=2
910	1525	P40336|VP26A_MOUSE	57.76	6	6	287.4	1	1	2		38114	Vacuolar protein sorting-associated protein 26A OS=Mus musculus OX=10090 GN=Vps26a PE=1 SV=1
1036	1241	B2RVL6|ZCH24_MOUSE	57.69	4	4	1307.4	1	1	1		26961	Zinc finger CCHC domain-containing protein 24 OS=Mus musculus OX=10090 GN=Zcchc24 PE=1 SV=1
852	1092	Q8C0C7|SYFA_MOUSE	57.66	2	2	1268.5	1	1	2		57599	Phenylalanine--tRNA ligase alpha subunit OS=Mus musculus OX=10090 GN=Farsa PE=1 SV=1
712	1528	Q99KV1|DJB11_MOUSE	57.56	4	4	504.18	1	1	3	Carbamidomethylation	40555	DnaJ homolog subfamily B member 11 OS=Mus musculus OX=10090 GN=Dnajb11 PE=1 SV=1
1101	1529	P63168|DYL1_MOUSE	57.53	25	25	127.59	1	1	1	Carbamidomethylation	10366	Dynein light chain 1 cytoplasmic OS=Mus musculus OX=10090 GN=Dynll1 PE=1 SV=1
914	1542	Q68FG3|SPT2_MOUSE	57.51	2	2	1192.5	1	1	2		74818	Protein SPT2 homolog OS=Mus musculus OX=10090 GN=Spty2d1 PE=2 SV=1
1102	1531	O35658|C1QBP_MOUSE	57.47	5	5	273.52	1	1	1	Deamidation (NQ)	31013	Complement component 1 Q subcomponent-binding protein mitochondrial OS=Mus musculus OX=10090 GN=C1qbp PE=1 SV=1
601	581	Q80Y19|RHGBA_MOUSE	57.44	2	2	233.08	1	1	4	Carbamidomethylation	108436	Rho GTPase-activating protein 11A OS=Mus musculus OX=10090 GN=Arhgap11a PE=1 SV=2
1009	1064	Q8BGQ7|SYAC_MOUSE	57.31	1	1	134.23	1	1	1	Carbamidomethylation	106908	Alanine--tRNA ligase cytoplasmic OS=Mus musculus OX=10090 GN=Aars1 PE=1 SV=1
1108	1550	Q61704|ITIH3_MOUSE	57	1	1	313.33	1	1	1		99358	Inter-alpha-trypsin inhibitor heavy chain H3 OS=Mus musculus OX=10090 GN=Itih3 PE=1 SV=3
732	1142	Q99M87|DNJA3_MOUSE	56.93	2	2	628.86	1	1	3	Carbamidomethylation	52444	DnaJ homolog subfamily A member 3 mitochondrial OS=Mus musculus OX=10090 GN=Dnaja3 PE=1 SV=1
1116	1581	Q8BG32|PSD11_MOUSE	56.85	2	2	0	1	1	1	Acetylation (Protein N-term)	47437	26S proteasome non-ATPase regulatory subunit 11 OS=Mus musculus OX=10090 GN=Psmd11 PE=1 SV=3
1104	1543	Q61850|FOXC2_MOUSE	56.67	3	3	528.02	1	1	1		52874	Forkhead box protein C2 OS=Mus musculus OX=10090 GN=Foxc2 PE=1 SV=2
1007	1046	B2RWS6|EP300_MOUSE	56.62	1	1	0	1	1	1	Acetylation (Protein N-term)	263302	Histone acetyltransferase p300 OS=Mus musculus OX=10090 GN=Ep300 PE=1 SV=2
593	1552	Q62189|SNRPA_MOUSE	56.59	4	4	2832.3	1	1	5	Oxidation (M); Acetylation (Protein N-term)	31835	U1 small nuclear ribonucleoprotein A OS=Mus musculus OX=10090 GN=Snrpa PE=1 SV=3
1106	1547	Q60634|FLOT2_MOUSE	56.42	3	3	390.19	1	1	1		47038	Flotillin-2 OS=Mus musculus OX=10090 GN=Flot2 PE=1 SV=2
1107	1549	Q9CZN7|GLYM_MOUSE	56.28	3	3	627.82	1	1	1	Carbamidomethylation	55759	Serine hydroxymethyltransferase mitochondrial OS=Mus musculus OX=10090 GN=Shmt2 PE=1 SV=1
915	1545	Q9CWJ9|PUR9_MOUSE	56.28	3	3	751.69	1	1	2		64217	Bifunctional purine biosynthesis protein PURH OS=Mus musculus OX=10090 GN=Atic PE=1 SV=2
807	1546	Q9DCG9|TR112_MOUSE	56.25	11	11	9827.2	1	1	2		14141	Multifunctional methyltransferase subunit TRM112-like protein OS=Mus musculus OX=10090 GN=Trmt112 PE=1 SV=1
486	1267	P15379|CD44_MOUSE	56.22	2	2	2402	1	1	6	Deamidation (NQ)	85617	CD44 antigen OS=Mus musculus OX=10090 GN=Cd44 PE=1 SV=3
916	1548	P08752|GNAI2_MOUSE	56.13	4	4	5929.4	1	1	2		40489	Guanine nucleotide-binding protein G(i) subunit alpha-2 OS=Mus musculus OX=10090 GN=Gnai2 PE=1 SV=5
710	950	Q9ERU9|RBP2_MOUSE	56.1	1	1	676.5	2	2	3		341122	E3 SUMO-protein ligase RanBP2 OS=Mus musculus OX=10090 GN=Ranbp2 PE=1 SV=2
1010	1065	Q5SQX6|CYFP2_MOUSE	56.07	1	1	516.91	1	1	1		145659	Cytoplasmic FMR1-interacting protein 2 OS=Mus musculus OX=10090 GN=Cyfip2 PE=1 SV=2
1010	1097	Q7TMB8|CYFP1_MOUSE	56.07	1	1	516.91	1	1	1		145241	Cytoplasmic FMR1-interacting protein 1 OS=Mus musculus OX=10090 GN=Cyfip1 PE=1 SV=1
819	798	O35134|RPA1_MOUSE	56.07	1	1	427.2	1	1	2	Carbamidomethylation	194109	DNA-directed RNA polymerase I subunit RPA1 OS=Mus musculus OX=10090 GN=Polr1a PE=1 SV=2
630	631	Q9R1Z8|VINEX_MOUSE	56.06	4	4	152.32	2	2	4		82349	Vinexin OS=Mus musculus OX=10090 GN=Sorbs3 PE=1 SV=1
827	1107	Q91W50|CSDE1_MOUSE	55.51	2	2	0	1	1	2	Carbamidomethylation	88791	Cold shock domain-containing protein E1 OS=Mus musculus OX=10090 GN=Csde1 PE=1 SV=1
1111	1569	P26443|DHE3_MOUSE	55.44	2	2	1512.7	1	1	1		61337	Glutamate dehydrogenase 1 mitochondrial OS=Mus musculus OX=10090 GN=Glud1 PE=1 SV=1
918	1557	Q9JMK2|KC1E_MOUSE	55.38	3	3	197.16	1	1	2		47322	Casein kinase I isoform epsilon OS=Mus musculus OX=10090 GN=Csnk1e PE=1 SV=2
652	1556	Q8K201|KCT2_MOUSE	55.36	5	5	181.35	1	1	3		28050	Keratinocyte-associated transmembrane protein 2 OS=Mus musculus OX=10090 GN=Kct2 PE=1 SV=2
823	1002	Q61699|HS105_MOUSE	55.32	2	2	368.31	1	1	2		96407	Heat shock protein 105 kDa OS=Mus musculus OX=10090 GN=Hsph1 PE=1 SV=2
955	595	Q8R3C6|RBM19_MOUSE	55.3	1	1	17902	1	1	1		106083	Probable RNA-binding protein 19 OS=Mus musculus OX=10090 GN=Rbm19 PE=1 SV=1
817	759	Q9JIX8|ACINU_MOUSE	55.25	1	1	0	1	1	2		150719	Apoptotic chromatin condensation inducer in the nucleus OS=Mus musculus OX=10090 GN=Acin1 PE=1 SV=3
1049	1554	Q921Y2|IMP3_MOUSE	55.19	9	9	192.91	1	1	1	Carbamidomethylation	21777	U3 small nucleolar ribonucleoprotein protein IMP3 OS=Mus musculus OX=10090 GN=Imp3 PE=2 SV=1
776	1555	P70698|PYRG1_MOUSE	55.03	3	3	252.62	1	1	3		66683	CTP synthase 1 OS=Mus musculus OX=10090 GN=Ctps1 PE=1 SV=2
948	531	Q569Z5|DDX46_MOUSE	55	1	1	0	1	1	1		117448	Probable ATP-dependent RNA helicase DDX46 OS=Mus musculus OX=10090 GN=Ddx46 PE=1 SV=2
778	1606	P97432|NBR1_MOUSE	54.89	1	1	0	1	1	3		109958	Next to BRCA1 gene 1 protein OS=Mus musculus OX=10090 GN=Nbr1 PE=1 SV=1
595	322	E9Q557|DESP_MOUSE	54.86	1	1	211.62	2	2	4		332913	Desmoplakin OS=Mus musculus OX=10090 GN=Dsp PE=1 SV=1
739	1567	Q99LI5|ZN281_MOUSE	54.15	2	2	222.78	1	1	3		96685	Zinc finger protein 281 OS=Mus musculus OX=10090 GN=Znf281 PE=1 SV=1
703	619	Q4QY64|ATAD5_MOUSE	54.09	2	2	287.88	2	2	3		203907	ATPase family AAA domain-containing protein 5 OS=Mus musculus OX=10090 GN=Atad5 PE=1 SV=1
978	979	P13864|DNMT1_MOUSE	54.08	1	1	244.57	1	1	1		183188	DNA (cytosine-5)-methyltransferase 1 OS=Mus musculus OX=10090 GN=Dnmt1 PE=1 SV=5
672	1640	Q60862|ORC2_MOUSE	53.97	2	2	122.31	1	1	4		65894	Origin recognition complex subunit 2 OS=Mus musculus OX=10090 GN=Orc2 PE=1 SV=1
1110	1568	Q9CZ13|QCR1_MOUSE	53.81	3	3	666.91	1	1	1	Carbamidomethylation	52852	Cytochrome b-c1 complex subunit 1 mitochondrial OS=Mus musculus OX=10090 GN=Uqcrc1 PE=1 SV=2
1119	1591	Q9Z0Z7|KLF5_MOUSE	53.74	2	2	628.05	1	1	1		49754	Krueppel-like factor 5 OS=Mus musculus OX=10090 GN=Klf5 PE=1 SV=2
644	1125	Q9CR59|G45IP_MOUSE	53.57	4	4	0	1	1	4		25820	Growth arrest and DNA damage-inducible proteins-interacting protein 1 OS=Mus musculus OX=10090 GN=Gadd45gip1 PE=1 SV=1
733	1200	P62071|RRAS2_MOUSE	53.55	6	6	329.36	1	1	3		23400	Ras-related protein R-Ras2 OS=Mus musculus OX=10090 GN=Rras2 PE=1 SV=1
889	958	Q8BU14|SEC62_MOUSE	53.25	5	5	3983.5	2	2	2	Carbamidomethylation	45581	Translocation protein SEC62 OS=Mus musculus OX=10090 GN=Sec62 PE=1 SV=1
1113	1573	Q62311|TAF6_MOUSE	53.22	2	2	0	1	1	1		72673	Transcription initiation factor TFIID subunit 6 OS=Mus musculus OX=10090 GN=Taf6 PE=1 SV=1
940	707	P09541|MYL4_MOUSE	53.22	7	7	170.9	1	1	1		21159	Myosin light chain 4 OS=Mus musculus OX=10090 GN=Myl4 PE=1 SV=3
843	999	Q99JY0|ECHB_MOUSE	53.19	2	2	0	1	1	2		51386	Trifunctional enzyme subunit beta mitochondrial OS=Mus musculus OX=10090 GN=Hadhb PE=1 SV=1
465	1078	Q9JJ48|ZC3H8_MOUSE	53.1	6	6	496.5	1	1	7	Deamidation (NQ)	34913	Zinc finger CCCH domain-containing protein 8 OS=Mus musculus OX=10090 GN=Zc3h8 PE=1 SV=2
801	540	Q6P9R1|DDX51_MOUSE	52.93	2	2	1193.2	1	1	2		70368	ATP-dependent RNA helicase DDX51 OS=Mus musculus OX=10090 GN=Ddx51 PE=1 SV=1
1051	1594	Q91WM3|U3IP2_MOUSE	52.86	2	2	0	1	1	1		52107	U3 small nucleolar RNA-interacting protein 2 OS=Mus musculus OX=10090 GN=Rrp9 PE=1 SV=1
1117	1582	Q80W68|KIRR1_MOUSE	52.78	1	1	1759.1	1	1	1		87176	Kin of IRRE-like protein 1 OS=Mus musculus OX=10090 GN=Kirrel1 PE=1 SV=1
865	1574	Q08024|PEBB_MOUSE	52.75	9	9	3009.7	1	1	2		22030	Core-binding factor subunit beta OS=Mus musculus OX=10090 GN=Cbfb PE=1 SV=1
1114	1575	Q9JJA4|WDR12_MOUSE	52.73	4	4	5068.6	1	1	1		47347	Ribosome biogenesis protein WDR12 OS=Mus musculus OX=10090 GN=Wdr12 PE=1 SV=1
890	964	Q62376|RU17_MOUSE	52.31	4	4	74.078	2	2	2		51992	U1 small nuclear ribonucleoprotein 70 kDa OS=Mus musculus OX=10090 GN=Snrnp70 PE=1 SV=2
777	1583	Q9Z2E1|MBD2_MOUSE	52.12	3	3	4371.3	1	1	3		43501	Methyl-CpG-binding domain protein 2 OS=Mus musculus OX=10090 GN=Mbd2 PE=2 SV=2
694	969	P35700|PRDX1_MOUSE	52.04	6	6	5704.7	1	1	3		22176	Peroxiredoxin-1 OS=Mus musculus OX=10090 GN=Prdx1 PE=1 SV=1
975	787	Q9R1C7|PR40A_MOUSE	51.88	1	1	330.39	1	1	1		108481	Pre-mRNA-processing factor 40 homolog A OS=Mus musculus OX=10090 GN=Prpf40a PE=1 SV=1
1012	1079	Q4FZF3|DDX49_MOUSE	51.71	3	3	0	1	1	1		54094	Probable ATP-dependent RNA helicase DDX49 OS=Mus musculus OX=10090 GN=Ddx49 PE=2 SV=1
806	1151	Q05D44|IF2P_MOUSE	51.61	1	1	721.7	1	1	2		137616	Eukaryotic translation initiation factor 5B OS=Mus musculus OX=10090 GN=Eif5b PE=1 SV=2
857	1286	Q9QY06|MYO9B_MOUSE	51.41	1	1	142.14	1	1	2		238832	Unconventional myosin-IXb OS=Mus musculus OX=10090 GN=Myo9b PE=1 SV=2
973	719	O35144|TERF2_MOUSE	51.3	3	3	0	1	1	1		60263	Telomeric repeat-binding factor 2 OS=Mus musculus OX=10090 GN=Terf2 PE=1 SV=3
1115	1578	P06745|G6PI_MOUSE	51.08	3	3	151.43	1	1	1		62767	Glucose-6-phosphate isomerase OS=Mus musculus OX=10090 GN=Gpi PE=1 SV=4
966	496	Q69ZN7|MYOF_MOUSE	51.04	1	1	55.311	1	1	1		233322	Myoferlin OS=Mus musculus OX=10090 GN=Myof PE=1 SV=2
735	1235	Q6PE01|SNR40_MOUSE	51.01	3	3	1877.4	1	1	3		39276	U5 small nuclear ribonucleoprotein 40 kDa protein OS=Mus musculus OX=10090 GN=Snrnp40 PE=1 SV=1
622	1600	P01887|B2MG_MOUSE	51	8	8	2015.1	1	1	4		13779	Beta-2-microglobulin OS=Mus musculus OX=10090 GN=B2m PE=1 SV=2
919	1588	Q99MN1|SYK_MOUSE	50.72	3	3	289.01	1	1	2	Acetylation (Protein N-term)	67840	Lysine--tRNA ligase OS=Mus musculus OX=10090 GN=Kars1 PE=1 SV=1
1118	1589	P63037|DNJA1_MOUSE	50.72	3	3	1878.2	1	1	1		44868	DnaJ homolog subfamily A member 1 OS=Mus musculus OX=10090 GN=Dnaja1 PE=1 SV=1
1050	1590	Q6NVF9|CPSF6_MOUSE	50.45	2	2	3381.3	1	1	1		59153	Cleavage and polyadenylation specificity factor subunit 6 OS=Mus musculus OX=10090 GN=Cpsf6 PE=1 SV=1
1148	1678	P97379|G3BP2_MOUSE	50.13	2	2	0	1	1	1		54088	Ras GTPase-activating protein-binding protein 2 OS=Mus musculus OX=10090 GN=G3bp2 PE=1 SV=2
1004	974	Q6DFV5|HELZ_MOUSE	50.03	1	1	367.88	1	1	1		219878	Probable helicase with zinc finger domain OS=Mus musculus OX=10090 GN=Helz PE=1 SV=2
866	1595	Q8BMC4|NOP9_MOUSE	49.66	2	2	535.67	1	1	2		70047	Nucleolar protein 9 OS=Mus musculus OX=10090 GN=Nop9 PE=1 SV=1
1120	1592	Q8VBW5|BBX_MOUSE	49.64	2	2	68.34	1	1	1	Carbamidomethylation	100783	HMG box transcription factor BBX OS=Mus musculus OX=10090 GN=Bbx PE=1 SV=2
1121	1593	Q923G2|RPAB3_MOUSE	49.56	9	9	439.39	1	1	1		17143	DNA-directed RNA polymerases I II and III subunit RPABC3 OS=Mus musculus OX=10090 GN=Polr2h PE=1 SV=3
844	1013	P08003|PDIA4_MOUSE	49.25	2	2	198.45	1	1	2		71982	Protein disulfide-isomerase A4 OS=Mus musculus OX=10090 GN=Pdia4 PE=1 SV=3
920	1599	P28740|KIF2A_MOUSE	49.11	2	2	452.31	1	1	2		79756	Kinesin-like protein KIF2A OS=Mus musculus OX=10090 GN=Kif2a PE=1 SV=2
1122	1597	Q3UBX0|TM109_MOUSE	49.07	5	5	177.16	1	1	1		26306	Transmembrane protein 109 OS=Mus musculus OX=10090 GN=Tmem109 PE=1 SV=2
868	1607	Q6P9Q4|FHOD1_MOUSE	48.61	1	1	1160.5	1	1	2	Deamidation (NQ)	129600	FH1/FH2 domain-containing protein 1 OS=Mus musculus OX=10090 GN=Fhod1 PE=1 SV=3
921	1602	Q8CDN6|TXNL1_MOUSE	48.58	5	5	448.03	1	1	2		32237	Thioredoxin-like protein 1 OS=Mus musculus OX=10090 GN=Txnl1 PE=1 SV=3
989	1192	Q924W7|DEN2B_MOUSE	48.29	2	2	28.491	1	1	1		126861	DENN domain-containing protein 2B OS=Mus musculus OX=10090 GN=Dennd2b PE=1 SV=1
1052	1603	Q922J9|FACR1_MOUSE	48.22	3	3	1462.3	1	1	1		59435	Fatty acyl-CoA reductase 1 OS=Mus musculus OX=10090 GN=Far1 PE=1 SV=1
922	1604	Q9DC51|GNAI3_MOUSE	48.09	4	4	861.63	1	1	2		40538	Guanine nucleotide-binding protein G(i) subunit alpha OS=Mus musculus OX=10090 GN=Gnai3 PE=1 SV=3
1053	1605	Q9Z321|TOP3B_MOUSE	48.04	2	2	239.76	1	1	1	Carbamidomethylation	96949	DNA topoisomerase 3-beta-1 OS=Mus musculus OX=10090 GN=Top3b PE=1 SV=1
924	1610	Q9EPA7|NMNA1_MOUSE	47.84	4	4	181.34	1	1	2		32355	Nicotinamide/nicotinic acid mononucleotide adenylyltransferase 1 OS=Mus musculus OX=10090 GN=Nmnat1 PE=1 SV=2
447	1044	Q8CD15|RIOX2_MOUSE	47.62	4	4	1362	1	1	7	Carbamidomethylation; Deamidation (NQ)	53517	Ribosomal oxygenase 2 OS=Mus musculus OX=10090 GN=Riox2 PE=1 SV=2
1125	1624	P01633|KV5A1_MOUSE	47.58	6	6	398.04	1	1	1		16434	Ig kappa chain V19-17 OS=Mus musculus OX=10090 GN=Igk-V19-17 PE=1 SV=1
1123	1609	Q9QUM9|PSA6_MOUSE	47.48	5	5	0	1	1	1		27372	Proteasome subunit alpha type-6 OS=Mus musculus OX=10090 GN=Psma6 PE=1 SV=1
923	1608	Q9CQU3|RER1_MOUSE	47.47	9	9	294.53	1	1	2		22988	Protein RER1 OS=Mus musculus OX=10090 GN=Rer1 PE=1 SV=1
925	1618	Q8K3A9|MEPCE_MOUSE	47.41	2	2	286.86	1	1	2		72050	7SK snRNA methylphosphate capping enzyme OS=Mus musculus OX=10090 GN=Mepce PE=1 SV=2
869	1611	Q9DCC8|TOM20_MOUSE	47.22	9	9	0	1	1	2		16284	Mitochondrial import receptor subunit TOM20 homolog OS=Mus musculus OX=10090 GN=Tomm20 PE=1 SV=1
582	1612	P01648|KV5AF_MOUSE	47.2	17	17	449.36	1	1	5		11961	Ig kappa chain V-V region HP 91A3 OS=Mus musculus OX=10090 PE=1 SV=1
582	1613	P01649|KV5AG_MOUSE	47.2	17	17	449.36	1	1	5		12057	Ig kappa chain V-V regions OS=Mus musculus OX=10090 PE=1 SV=1
870	1625	Q64092|TFE3_MOUSE	47.18	2	2	101.72	1	1	2		61536	Transcription factor E3 OS=Mus musculus OX=10090 GN=Tfe3 PE=1 SV=2
1054	1617	Q8R1K1|UBAC2_MOUSE	47.09	4	4	473.11	1	1	1		39057	Ubiquitin-associated domain-containing protein 2 OS=Mus musculus OX=10090 GN=Ubac2 PE=1 SV=1
621	1282	Q5SFM8|RBM27_MOUSE	47.05	1	1	1793.7	1	1	4		118551	RNA-binding protein 27 OS=Mus musculus OX=10090 GN=Rbm27 PE=1 SV=3
623	1619	Q3TXT3|SOSSC_MOUSE	46.77	12	12	0	1	1	4	Acetylation (Protein N-term)	11411	SOSS complex subunit C OS=Mus musculus OX=10090 GN=Inip PE=3 SV=1
872	1635	Q91W18|TDRD3_MOUSE	46.59	1	1	1297.3	1	1	2		82253	Tudor domain-containing protein 3 OS=Mus musculus OX=10090 GN=Tdrd3 PE=1 SV=4
1128	1636	Q8R1F1|NIBA2_MOUSE	46.53	1	1	347.99	1	1	1		84819	Protein Niban 2 OS=Mus musculus OX=10090 GN=Niban2 PE=1 SV=2
958	639	P61750|ARF4_MOUSE	46.39	6	6	3137.8	1	1	1		20397	ADP-ribosylation factor 4 OS=Mus musculus OX=10090 GN=Arf4 PE=1 SV=2
927	1621	Q99J95|CDK9_MOUSE	46.35	3	3	170.17	1	1	2		42762	Cyclin-dependent kinase 9 OS=Mus musculus OX=10090 GN=Cdk9 PE=1 SV=1
1124	1622	Q9DBJ1|PGAM1_MOUSE	46.29	6	6	128.13	1	1	1	Carbamidomethylation	28832	Phosphoglycerate mutase 1 OS=Mus musculus OX=10090 GN=Pgam1 PE=1 SV=3
928	1623	Q9DAS9|GBG12_MOUSE	46.27	15	15	313.71	1	1	2		7997	Guanine nucleotide-binding protein G(I)/G(S)/G(O) subunit gamma-12 OS=Mus musculus OX=10090 GN=Gng12 PE=1 SV=3
969	656	Q61768|KINH_MOUSE	46.25	2	2	0	1	1	1		109551	Kinesin-1 heavy chain OS=Mus musculus OX=10090 GN=Kif5b PE=1 SV=3
1126	1626	Q8BX17|GEMI5_MOUSE	46.07	1	1	0	1	1	1	Carbamidomethylation	166591	Gem-associated protein 5 OS=Mus musculus OX=10090 GN=Gemin5 PE=1 SV=2
793	641	Q9DC71|RT15_MOUSE	46.07	8	8	3957.5	2	2	2		29464	28S ribosomal protein S15 mitochondrial OS=Mus musculus OX=10090 GN=Mrps15 PE=1 SV=2
779	1627	Q3UEB3|PUF60_MOUSE	45.92	3	3	371.88	1	1	3		60249	Poly(U)-binding-splicing factor PUF60 OS=Mus musculus OX=10090 GN=Puf60 PE=1 SV=2
1055	1628	P61963|DCAF7_MOUSE	45.91	4	4	268.36	1	1	1		38926	DDB1- and CUL4-associated factor 7 OS=Mus musculus OX=10090 GN=Dcaf7 PE=1 SV=1
816	726	A2AJK6|CHD7_MOUSE	45.86	1	1	768.92	1	1	2		334061	Chromodomain-helicase-DNA-binding protein 7 OS=Mus musculus OX=10090 GN=Chd7 PE=1 SV=1
1127	1629	Q9DAW6|PRP4_MOUSE	45.81	3	3	902.11	1	1	1	Carbamidomethylation	58370	U4/U6 small nuclear ribonucleoprotein Prp4 OS=Mus musculus OX=10090 GN=Prpf4 PE=1 SV=1
1129	1637	Q9DC48|PRP17_MOUSE	45.78	2	2	409.62	1	1	1		65461	Pre-mRNA-processing factor 17 OS=Mus musculus OX=10090 GN=Cdc40 PE=2 SV=1
871	1632	Q640N1|AEBP1_MOUSE	45.55	2	2	71.785	1	1	2		128365	Adipocyte enhancer-binding protein 1 OS=Mus musculus OX=10090 GN=Aebp1 PE=1 SV=1
1026	1153	Q9Z0H3|SNF5_MOUSE	45.11	3	3	70.166	1	1	1		44141	SWI/SNF-related matrix-associated actin-dependent regulator of chromatin subfamily B member 1 OS=Mus musculus OX=10090 GN=Smarcb1 PE=1 SV=1
624	1638	Q8VC52|RBPS2_MOUSE	44.88	5	5	0	1	1	4		22463	RNA-binding protein with multiple splicing 2 OS=Mus musculus OX=10090 GN=Rbpms2 PE=1 SV=1
873	1643	P62869|ELOB_MOUSE	44.66	8	8	3279.9	1	1	2		13170	Elongin-B OS=Mus musculus OX=10090 GN=Elob PE=1 SV=1
1130	1639	Q8K2K6|AGFG1_MOUSE	44.65	2	2	360.44	1	1	1		58043	Arf-GAP domain and FG repeat-containing protein 1 OS=Mus musculus OX=10090 GN=Agfg1 PE=1 SV=2
1023	1120	Q9R059|FHL3_MOUSE	44.64	3	3	1483.1	1	1	1	Carbamidomethylation	31795	Four and a half LIM domains protein 3 OS=Mus musculus OX=10090 GN=Fhl3 PE=1 SV=2
826	1054	Q8BK35|NOP53_MOUSE	44.62	3	3	3978.4	1	1	2		55793	Ribosome biogenesis protein NOP53 OS=Mus musculus OX=10090 GN=Nop53 PE=1 SV=1
792	635	G5E829|AT2B1_MOUSE	44.6	1	1	564.77	1	1	2		134747	Plasma membrane calcium-transporting ATPase 1 OS=Mus musculus OX=10090 GN=Atp2b1 PE=1 SV=1
780	1641	Q8C181|MBNL2_MOUSE	44.5	3	3	465.83	1	1	3	Acetylation (Protein N-term)	40156	Muscleblind-like protein 2 OS=Mus musculus OX=10090 GN=Mbnl2 PE=2 SV=2
1132	1645	Q60973|RBBP7_MOUSE	44.32	2	2	826.12	1	1	1		47790	Histone-binding protein RBBP7 OS=Mus musculus OX=10090 GN=Rbbp7 PE=1 SV=1
714	1646	Q8VE37|RCC1_MOUSE	44.23	2	2	218.01	1	1	3		44931	Regulator of chromosome condensation OS=Mus musculus OX=10090 GN=Rcc1 PE=1 SV=1
1131	1642	Q921K9|BCL7B_MOUSE	44.16	7	7	101.36	1	1	1	Carbamidomethylation	22238	B-cell CLL/lymphoma 7 protein family member B OS=Mus musculus OX=10090 GN=Bcl7b PE=1 SV=1
598	1648	Q60931|VDAC3_MOUSE	43.75	4	4	2390.5	1	1	4	Carbamidomethylation; Acetylation (Protein N-term)	30753	Voltage-dependent anion-selective channel protein 3 OS=Mus musculus OX=10090 GN=Vdac3 PE=1 SV=1
1133	1647	Q61316|HSP74_MOUSE	43.68	2	2	0	1	1	1		94133	Heat shock 70 kDa protein 4 OS=Mus musculus OX=10090 GN=Hspa4 PE=1 SV=1
1025	1138	Q9CXU1|MED31_MOUSE	43.62	13	13	0	1	1	1		15771	Mediator of RNA polymerase II transcription subunit 31 OS=Mus musculus OX=10090 GN=Med31 PE=1 SV=2
786	521	Q91W39|NCOA5_MOUSE	43.57	2	2	99.168	1	1	2	Oxidation (M)	65319	Nuclear receptor coactivator 5 OS=Mus musculus OX=10090 GN=Ncoa5 PE=1 SV=1
736	1273	Q52KI8|SRRM1_MOUSE	43.05	1	1	254.67	1	1	3		106862	Serine/arginine repetitive matrix protein 1 OS=Mus musculus OX=10090 GN=Srrm1 PE=1 SV=2
968	651	P67778|PHB_MOUSE	42.88	4	4	334.8	1	1	1		29820	Prohibitin OS=Mus musculus OX=10090 GN=Phb PE=1 SV=1
1134	1649	Q9CZX7|PP4P2_MOUSE	42.68	4	4	455.91	1	1	1	Carbamidomethylation	28038	Type 2 phosphatidylinositol 4 5-bisphosphate 4-phosphatase OS=Mus musculus OX=10090 GN=Pip4p2 PE=1 SV=1
1035	1239	Q80ZS3|RT26_MOUSE	42.55	6	6	476.22	1	1	1		23444	28S ribosomal protein S26 mitochondrial OS=Mus musculus OX=10090 GN=Mrps26 PE=1 SV=1
1135	1651	Q8BIZ6|SNIP1_MOUSE	42.42	3	3	2550	1	1	1		44415	Smad nuclear-interacting protein 1 OS=Mus musculus OX=10090 GN=Snip1 PE=1 SV=1
970	667	Q0P678|ZCH18_MOUSE	41.98	3	3	0	1	1	1		105694	Zinc finger CCCH domain-containing protein 18 OS=Mus musculus OX=10090 GN=Zc3h18 PE=1 SV=1
974	786	Q9JMH9|MY18A_MOUSE	41.89	1	1	0	1	1	1		232753	Unconventional myosin-XVIIIa OS=Mus musculus OX=10090 GN=Myo18a PE=1 SV=2
1032	1184	P50396|GDIA_MOUSE	41.78	4	4	0	1	1	1	Carbamidomethylation	50522	Rab GDP dissociation inhibitor alpha OS=Mus musculus OX=10090 GN=Gdi1 PE=1 SV=3
1032	1654	Q61598|GDIB_MOUSE	41.78	4	4	0	1	1	1	Carbamidomethylation	50537	Rab GDP dissociation inhibitor beta OS=Mus musculus OX=10090 GN=Gdi2 PE=1 SV=1
1056	1655	Q8K2X3|STN1_MOUSE	41.77	4	4	499.8	1	1	1	Carbamidomethylation; Deamidation (NQ)	43486	CST complex subunit STN1 OS=Mus musculus OX=10090 GN=Stn1 PE=1 SV=2
1137	1657	Q8VI94|OASL1_MOUSE	41.37	3	3	514.13	1	1	1	Acetylation (Protein N-term)	59089	2'-5'-oligoadenylate synthase-like protein 1 OS=Mus musculus OX=10090 GN=Oasl1 PE=2 SV=1
951	1048	Q08775|RUNX2_MOUSE	41.32	2	2	0	1	1	1		66205	Runt-related transcription factor 2 OS=Mus musculus OX=10090 GN=Runx2 PE=1 SV=2
1138	1658	Q78ZA7|NP1L4_MOUSE	41.28	3	3	0	1	1	1		42679	Nucleosome assembly protein 1-like 4 OS=Mus musculus OX=10090 GN=Nap1l4 PE=1 SV=1
1057	1659	Q9WU56|TRUA_MOUSE	41.15	3	3	0	1	1	1		47502	tRNA pseudouridine synthase A OS=Mus musculus OX=10090 GN=Pus1 PE=1 SV=2
696	1662	O88456|CPNS1_MOUSE	41.05	4	4	676.69	1	1	3	Carbamidomethylation	28463	Calpain small subunit 1 OS=Mus musculus OX=10090 GN=Capns1 PE=1 SV=1
1139	1663	B2RY56|RBM25_MOUSE	40.83	2	2	0	1	1	1		99552	RNA-binding protein 25 OS=Mus musculus OX=10090 GN=Rbm25 PE=1 SV=2
1038	1248	Q6R0H7|GNAS1_MOUSE	40.79	1	1	416.11	1	1	1		121505	Guanine nucleotide-binding protein G(s) subunit alpha isoforms XLas OS=Mus musculus OX=10090 GN=Gnas PE=1 SV=1
1038	1664	P63094|GNAS2_MOUSE	40.79	3	3	416.11	1	1	1		45664	Guanine nucleotide-binding protein G(s) subunit alpha isoforms short OS=Mus musculus OX=10090 GN=Gnas PE=1 SV=1
1030	1175	Q9R0Q4|MO4L2_MOUSE	40.74	4	4	0	1	1	1		32184	Mortality factor 4-like protein 2 OS=Mus musculus OX=10090 GN=Morf4l2 PE=1 SV=1
1140	1667	O70326|GREM1_MOUSE	40.72	6	6	0	1	1	1	Carbamidomethylation	20710	Gremlin-1 OS=Mus musculus OX=10090 GN=Grem1 PE=2 SV=1
981	1015	Q99KD5|UN45A_MOUSE	40.69	1	1	164.84	1	1	1		103447	Protein unc-45 homolog A OS=Mus musculus OX=10090 GN=Unc45a PE=1 SV=2
874	1668	P45376|ALDR_MOUSE	40.51	3	3	2550.6	1	1	2		35732	Aldo-keto reductase family 1 member B1 OS=Mus musculus OX=10090 GN=Akr1b1 PE=1 SV=3
875	1670	Q99N93|RM16_MOUSE	40.37	4	4	571.01	1	1	2	Carbamidomethylation; Oxidation (M)	28804	39S ribosomal protein L16 mitochondrial OS=Mus musculus OX=10090 GN=Mrpl16 PE=1 SV=1
1141	1669	Q8K426|RETNG_MOUSE	40.3	10	10	3967.9	1	1	1	Carbamidomethylation	12535	Resistin-like gamma OS=Mus musculus OX=10090 GN=Retnlg PE=1 SV=1
1142	1671	Q8QZT1|THIL_MOUSE	40.28	3	3	195.26	1	1	1		44816	Acetyl-CoA acetyltransferase mitochondrial OS=Mus musculus OX=10090 GN=Acat1 PE=1 SV=1
1143	1673	Q9DB20|ATPO_MOUSE	40.21	5	5	1236.5	1	1	1		23364	ATP synthase subunit O mitochondrial OS=Mus musculus OX=10090 GN=Atp5po PE=1 SV=1
1145	1675	Q62433|NDRG1_MOUSE	40.05	4	4	180.54	1	1	1		43009	Protein NDRG1 OS=Mus musculus OX=10090 GN=Ndrg1 PE=1 SV=1
1146	1676	Q9DC28|KC1D_MOUSE	40	3	3	589.59	1	1	1		47316	Casein kinase I isoform delta OS=Mus musculus OX=10090 GN=Csnk1d PE=1 SV=2
1147	1677	Q03141|MARK3_MOUSE	39.91	3	3	0	1	1	1		84390	MAP/microtubule affinity-regulating kinase 3 OS=Mus musculus OX=10090 GN=Mark3 PE=1 SV=2
1149	1680	P70280|VAMP7_MOUSE	39.72	5	5	200.65	1	1	1		24967	Vesicle-associated membrane protein 7 OS=Mus musculus OX=10090 GN=Vamp7 PE=1 SV=1
983	1145	Q03347|RUNX1_MOUSE	39.5	3	3	184.81	1	1	1	Oxidation (M)	48610	Runt-related transcription factor 1 OS=Mus musculus OX=10090 GN=Runx1 PE=1 SV=1
1150	1683	Q6PGC1|DHX29_MOUSE	39.44	1	1	0	1	1	1		153975	ATP-dependent RNA helicase DHX29 OS=Mus musculus OX=10090 GN=Dhx29 PE=1 SV=1
1151	1684	Q8CFI5|SYPM_MOUSE	39.09	2	2	1370.8	1	1	1	Carbamidomethylation; Acetylation (Protein N-term)	53518	Probable proline--tRNA ligase mitochondrial OS=Mus musculus OX=10090 GN=Pars2 PE=1 SV=2
976	794	O88286|WIZ_MOUSE	39.09	1	1	420.99	1	1	1		184290	Protein Wiz OS=Mus musculus OX=10090 GN=Wiz PE=1 SV=2
1152	1685	Q9D3D9|ATPD_MOUSE	38.84	8	8	365.73	1	1	1		17600	ATP synthase subunit delta mitochondrial OS=Mus musculus OX=10090 GN=Atp5f1d PE=1 SV=1
1155	1691	P56135|ATPK_MOUSE	38.58	10	10	1154.6	1	1	1	Acetylation (Protein N-term)	10344	ATP synthase subunit f mitochondrial OS=Mus musculus OX=10090 GN=Atp5mf PE=1 SV=3
564	1688	Q8CGN5|PLIN1_MOUSE	38.42	2	2	175.71	1	1	5		55596	Perilipin-1 OS=Mus musculus OX=10090 GN=Plin1 PE=1 SV=2
1153	1689	Q5HZI2|C2C4C_MOUSE	38.38	3	3	0	1	1	1		44614	C2 calcium-dependent domain-containing protein 4C OS=Mus musculus OX=10090 GN=C2cd4c PE=1 SV=1
1154	1690	Q60875|ARHG2_MOUSE	38.31	1	1	845.63	1	1	1		111974	Rho guanine nucleotide exchange factor 2 OS=Mus musculus OX=10090 GN=Arhgef2 PE=1 SV=4
1031	1183	A6BLY7|K1C28_MOUSE	38.03	2	2	0	1	1	1	Oxidation (M); Deamidation (NQ)	50346	Keratin type I cytoskeletal 28 OS=Mus musculus OX=10090 GN=Krt28 PE=1 SV=1

## Sheet: IP-Mass-pRK-flag-YTHDC1
Suppl. Table S5. Co-IP/MS identifies YTHDC1 Interacting Proteins in C2C12 Myoblasts
Proteins identified in pRK-flag-YTHDC1
Protein Group	Protein ID	Accession	-10lgP	Coverage (%)	Coverage (%) RK	Area RK	#Peptides	#Unique	#Spec RK	PTM	Avg. Mass	Description
1	1	Q8VDD5|MYH9_MOUSE	546.15	73	73	22314000	193	161	4157	Carbamidomethylation; Oxidation (M); Acetylation (Protein N-term); Deamidation (NQ)	226370	Myosin-9 OS=Mus musculus OX=10090 GN=Myh9 PE=1 SV=4
6	4	Q9QXS1|PLEC_MOUSE	506.56	46	46	1215500	208	208	635	Carbamidomethylation; Oxidation (M); Deamidation (NQ)	534193	Plectin OS=Mus musculus OX=10090 GN=Plec PE=1 SV=3
2	3	Q61879|MYH10_MOUSE	479.14	61	61	1739500	139	111	1059	Carbamidomethylation; Oxidation (M); Acetylation (Protein N-term); Deamidation (NQ)	228994	Myosin-10 OS=Mus musculus OX=10090 GN=Myh10 PE=1 SV=2
28	5	E9PVX6|KI67_MOUSE	418.16	40	40	162920	96	96	203	Carbamidomethylation; Oxidation (M); Acetylation (Protein N-term); Deamidation (NQ)	350864	Proliferation marker protein Ki-67 OS=Mus musculus OX=10090 GN=Mki67 PE=1 SV=1
12	12	Q7TPV4|MBB1A_MOUSE	398.1	37	37	1478600	52	52	374	Carbamidomethylation; Oxidation (M); Deamidation (NQ)	152036	Myb-binding protein 1A OS=Mus musculus OX=10090 GN=Mybbp1a PE=1 SV=2
46	6	Q8BTM8|FLNA_MOUSE	393.26	34	34	261600	64	61	165	Carbamidomethylation; Oxidation (M); Deamidation (NQ)	281219	Filamin-A OS=Mus musculus OX=10090 GN=Flna PE=1 SV=5
9	2	Q9JIK5|DDX21_MOUSE	385.67	60	60	1177400	50	50	429	Carbamidomethylation; Oxidation (M); Deamidation (NQ)	93551	Nucleolar RNA helicase 2 OS=Mus musculus OX=10090 GN=Ddx21 PE=1 SV=3
32	8	Q99PL5|RRBP1_MOUSE	385.48	38	38	787010	57	57	189	Carbamidomethylation; Oxidation (M); Deamidation (NQ)	172878	Ribosome-binding protein 1 OS=Mus musculus OX=10090 GN=Rrbp1 PE=1 SV=2
41	9	E9Q7G0|NUMA1_MOUSE	385.01	38	38	131080	68	68	167	Carbamidomethylation; Oxidation (M); Deamidation (NQ)	235628	Nuclear mitotic apparatus protein 1 OS=Mus musculus OX=10090 GN=Numa1 PE=1 SV=1
5	14	P20152|VIME_MOUSE	372.21	81	81	3045100	47	43	686	Carbamidomethylation; Oxidation (M); Acetylation (Protein N-term); Deamidation (NQ)	53688	Vimentin OS=Mus musculus OX=10090 GN=Vim PE=1 SV=3
29	10	Q99104|MYO5A_MOUSE	368.55	32	32	270990	58	58	195	Carbamidomethylation; Oxidation (M); Acetylation (Protein N-term); Deamidation (NQ)	215536	Unconventional myosin-Va OS=Mus musculus OX=10090 GN=Myo5a PE=1 SV=2
54	80	Q04750|TOP1_MOUSE	358.85	42	42	269890	31	31	148	Carbamidomethylation; Oxidation (M); Acetylation (Protein N-term); Deamidation (NQ)	90876	DNA topoisomerase 1 OS=Mus musculus OX=10090 GN=Top1 PE=1 SV=2
42	58	Q62167|DDX3X_MOUSE	355.59	52	52	352310	31	30	167	Carbamidomethylation; Oxidation (M); Acetylation (Protein N-term); Deamidation (NQ)	73102	ATP-dependent RNA helicase DDX3X OS=Mus musculus OX=10090 GN=Ddx3x PE=1 SV=3
3	60	P60710|ACTB_MOUSE	351.69	73	73	1209900	26	3	989	Carbamidomethylation; Oxidation (M); Acetylation (Protein N-term); Deamidation (NQ)	41737	Actin cytoplasmic 1 OS=Mus musculus OX=10090 GN=Actb PE=1 SV=1
79	25	Q6P5H2|NEST_MOUSE	349.92	28	28	100290	40	40	104	Carbamidomethylation; Oxidation (M); Deamidation (NQ)	207122	Nestin OS=Mus musculus OX=10090 GN=Nes PE=1 SV=1
4	61	P63260|ACTG_MOUSE	343.87	73	73	777320	24	1	976	Carbamidomethylation; Oxidation (M); Acetylation (Protein N-term); Deamidation (NQ)	41793	Actin cytoplasmic 2 OS=Mus musculus OX=10090 GN=Actg1 PE=1 SV=1
125	39	Q8CJF7|ELYS_MOUSE	340.71	24	24	42706	40	40	68	Carbamidomethylation; Deamidation (NQ)	247644	Protein ELYS OS=Mus musculus OX=10090 GN=Ahctf1 PE=1 SV=1
31	18	P58774|TPM2_MOUSE	339.29	73	73	140130	35	21	191	Carbamidomethylation; Oxidation (M); Deamidation (NQ)	32837	Tropomyosin beta chain OS=Mus musculus OX=10090 GN=Tpm2 PE=1 SV=1
77	13	Q9EP71|RAI14_MOUSE	336.35	45	45	107630	40	40	112	Carbamidomethylation; Oxidation (M); Deamidation (NQ)	108852	Ankycorbin OS=Mus musculus OX=10090 GN=Rai14 PE=1 SV=1
19	50	P58771|TPM1_MOUSE	335.49	67	67	368910	32	11	239	Carbamidomethylation; Oxidation (M); Deamidation (NQ)	32681	Tropomyosin alpha-1 chain OS=Mus musculus OX=10090 GN=Tpm1 PE=1 SV=1
10	20	Q9D0E1|HNRPM_MOUSE	335.1	48	48	1440500	30	30	414	Carbamidomethylation; Oxidation (M); Acetylation (Protein N-term); Deamidation (NQ)	77649	Heterogeneous nuclear ribonucleoprotein M OS=Mus musculus OX=10090 GN=Hnrnpm PE=1 SV=3
20	95	Q9WTI7|MYO1C_MOUSE	332.57	30	30	498110	30	30	231	Carbamidomethylation; Oxidation (M); Deamidation (NQ)	121944	Unconventional myosin-Ic OS=Mus musculus OX=10090 GN=Myo1c PE=1 SV=2
15	153	Q9D8E6|RL4_MOUSE	331.26	58	58	1030300	28	28	262	Carbamidomethylation; Oxidation (M); Acetylation (Protein N-term); Deamidation (NQ)	47154	60S ribosomal protein L4 OS=Mus musculus OX=10090 GN=Rpl4 PE=1 SV=3
39	16	Q3U0V1|FUBP2_MOUSE	328.75	51	51	294000	31	29	171	Carbamidomethylation; Oxidation (M); Acetylation (Protein N-term); Deamidation (NQ)	76776	Far upstream element-binding protein 2 OS=Mus musculus OX=10090 GN=Khsrp PE=1 SV=2
49	51	O70133|DHX9_MOUSE	328.68	32	32	281440	36	36	156	Carbamidomethylation; Oxidation (M); Deamidation (NQ)	149474	ATP-dependent RNA helicase A OS=Mus musculus OX=10090 GN=Dhx9 PE=1 SV=2
21	43	Q61656|DDX5_MOUSE	327.87	51	51	324080	32	23	229	Carbamidomethylation; Oxidation (M); Deamidation (NQ)	69290	Probable ATP-dependent RNA helicase DDX5 OS=Mus musculus OX=10090 GN=Ddx5 PE=1 SV=2
80	7	P97434|MPRIP_MOUSE	327.74	46	46	75845	39	38	102	Carbamidomethylation; Oxidation (M); Deamidation (NQ)	116408	Myosin phosphatase Rho-interacting protein OS=Mus musculus OX=10090 GN=Mprip PE=1 SV=2
122	11	Q80X90|FLNB_MOUSE	326.52	20	20	20012	38	34	69	Carbamidomethylation; Oxidation (M); Deamidation (NQ)	277822	Filamin-B OS=Mus musculus OX=10090 GN=Flnb PE=1 SV=3
141	15	Q8K4L3|SVIL_MOUSE	326.29	22	22	44519	37	37	61	Carbamidomethylation; Oxidation (M); Deamidation (NQ)	243159	Supervillin OS=Mus musculus OX=10090 GN=Svil PE=1 SV=1
97	38	Q80YR5|SAFB2_MOUSE	323.88	30	30	27301	26	17	83	Carbamidomethylation; Oxidation (M); Acetylation (Protein N-term); Deamidation (NQ)	111839	Scaffold attachment factor B2 OS=Mus musculus OX=10090 GN=Safb2 PE=1 SV=2
33	89	P29341|PABP1_MOUSE	323.64	47	47	363590	27	27	189	Carbamidomethylation; Oxidation (M); Deamidation (NQ)	70671	Polyadenylate-binding protein 1 OS=Mus musculus OX=10090 GN=Pabpc1 PE=1 SV=2
18	248	Q8VEK3|HNRPU_MOUSE	322.6	33	33	1231400	26	26	246	Carbamidomethylation; Oxidation (M); Acetylation (Protein N-term); Deamidation (NQ)	87918	Heterogeneous nuclear ribonucleoprotein U OS=Mus musculus OX=10090 GN=Hnrnpu PE=1 SV=1
59	91	Q9D6Z1|NOP56_MOUSE	320.18	49	49	212090	27	27	137	Carbamidomethylation; Oxidation (M); Deamidation (NQ)	64464	Nucleolar protein 56 OS=Mus musculus OX=10090 GN=Nop56 PE=1 SV=2
90	37	Q8BMK4|CKAP4_MOUSE	319.83	51	51	137530	27	27	87	Oxidation (M); Deamidation (NQ)	63692	Cytoskeleton-associated protein 4 OS=Mus musculus OX=10090 GN=Ckap4 PE=1 SV=2
34	40	P63017|HSP7C_MOUSE	317.56	54	54	180650	29	25	189	Carbamidomethylation; Oxidation (M); Deamidation (NQ)	70871	Heat shock cognate 71 kDa protein OS=Mus musculus OX=10090 GN=Hspa8 PE=1 SV=1
104	22	Q2KN98|CYTSA_MOUSE	314.7	32	32	73744	32	32	81	Carbamidomethylation; Oxidation (M); Deamidation (NQ)	124488	Cytospin-A OS=Mus musculus OX=10090 GN=Specc1l PE=1 SV=1
87	107	D3YXK2|SAFB1_MOUSE	313.72	25	25	80316	24	15	90	Carbamidomethylation; Oxidation (M); Acetylation (Protein N-term); Deamidation (NQ)	105104	Scaffold attachment factor B1 OS=Mus musculus OX=10090 GN=Safb PE=1 SV=2
93	48	Q99PV0|PRP8_MOUSE	313.67	16	16	67468	34	34	85	Carbamidomethylation; Oxidation (M); Deamidation (NQ)	273615	Pre-mRNA-processing-splicing factor 8 OS=Mus musculus OX=10090 GN=Prpf8 PE=1 SV=2
8	72	P68033|ACTC_MOUSE	312.88	59	59	8755.4	19	1	480	Carbamidomethylation; Oxidation (M); Deamidation (NQ)	42019	Actin alpha cardiac muscle 1 OS=Mus musculus OX=10090 GN=Actc1 PE=1 SV=1
8	73	P62737|ACTA_MOUSE	312.88	59	59	8755.4	19	1	480	Carbamidomethylation; Oxidation (M); Deamidation (NQ)	42009	Actin aortic smooth muscle OS=Mus musculus OX=10090 GN=Acta2 PE=1 SV=1
74	23	Q8C2Q3|RBM14_MOUSE	311.6	36	36	444550	22	22	117	Carbamidomethylation; Oxidation (M); Deamidation (NQ)	69449	RNA-binding protein 14 OS=Mus musculus OX=10090 GN=Rbm14 PE=1 SV=1
7	71	P63268|ACTH_MOUSE	311.43	61	61	5887.2	19	1	482	Carbamidomethylation; Oxidation (M); Deamidation (NQ)	41877	Actin gamma-enteric smooth muscle OS=Mus musculus OX=10090 GN=Actg2 PE=1 SV=1
123	27	Q6P4T2|U520_MOUSE	311.38	16	16	38388	29	29	68	Carbamidomethylation; Oxidation (M)	244544	U5 small nuclear ribonucleoprotein 200 kDa helicase OS=Mus musculus OX=10090 GN=Snrnp200 PE=1 SV=1
55	17	P31001|DESM_MOUSE	309.72	53	53	153020	24	20	144	Carbamidomethylation; Oxidation (M); Deamidation (NQ)	53498	Desmin OS=Mus musculus OX=10090 GN=Des PE=1 SV=3
17	365	Q61937|NPM_MOUSE	308.83	52	52	684780	15	15	250	Carbamidomethylation; Oxidation (M); Acetylation (Protein N-term); Deamidation (NQ)	32560	Nucleophosmin OS=Mus musculus OX=10090 GN=Npm1 PE=1 SV=1
13	64	O08638|MYH11_MOUSE	308.56	11	11	297.62	24	2	319	Carbamidomethylation; Oxidation (M); Deamidation (NQ)	227026	Myosin-11 OS=Mus musculus OX=10090 GN=Myh11 PE=1 SV=1
172	77	Q6NS46|RRP5_MOUSE	307.58	21	21	44364	31	31	49	Carbamidomethylation; Oxidation (M); Acetylation (Protein N-term); Deamidation (NQ)	207777	Protein RRP5 homolog OS=Mus musculus OX=10090 GN=Pdcd11 PE=1 SV=2
14	9508	E9Q5K9|YTDC1_MOUSE	307.06	32	32	1192300	24	24	274	Deamidation (NQ)	85649	YTH domain-containing protein 1 OS=Mus musculus OX=10090 GN=Ythdc1 PE=1 SV=2
52	139	P62960|YBOX1_MOUSE	306.95	65	65	214740	17	12	152	Oxidation (M); Acetylation (Protein N-term); Deamidation (NQ)	35730	Y-box-binding protein 1 OS=Mus musculus OX=10090 GN=Ybx1 PE=1 SV=3
75	46	Q6A068|CDC5L_MOUSE	306.65	39	39	87606	25	25	115	Carbamidomethylation; Oxidation (M); Deamidation (NQ)	92190	Cell division cycle 5-like protein OS=Mus musculus OX=10090 GN=Cdc5l PE=1 SV=2
62	26	Q80X50|UBP2L_MOUSE	304.74	28	28	255070	20	20	131	Carbamidomethylation; Oxidation (M); Acetylation (Protein N-term); Deamidation (NQ)	116799	Ubiquitin-associated protein 2-like OS=Mus musculus OX=10090 GN=Ubap2l PE=1 SV=1
72	83	Q501J6|DDX17_MOUSE	304.52	37	37	65498	25	16	119	Carbamidomethylation; Oxidation (M); Deamidation (NQ)	72400	Probable ATP-dependent RNA helicase DDX17 OS=Mus musculus OX=10090 GN=Ddx17 PE=1 SV=1
27	155	P12970|RL7A_MOUSE	302.68	52	52	979120	20	20	205	Carbamidomethylation; Oxidation (M); Deamidation (NQ)	29977	60S ribosomal protein L7a OS=Mus musculus OX=10090 GN=Rpl7a PE=1 SV=2
190	1151	Q05D44|IF2P_MOUSE	302.03	19	19	18145	22	22	44	Carbamidomethylation	137616	Eukaryotic translation initiation factor 5B OS=Mus musculus OX=10090 GN=Eif5b PE=1 SV=2
166	174	F6ZDS4|TPR_MOUSE	301.15	16	16	25061	32	32	51	Carbamidomethylation; Deamidation (NQ)	273988	Nucleoprotein TPR OS=Mus musculus OX=10090 GN=Tpr PE=1 SV=1
83	94	Q08288|LYAR_MOUSE	299.91	36	36	140700	20	20	95	Carbamidomethylation; Oxidation (M); Deamidation (NQ)	43736	Cell growth-regulating nucleolar protein OS=Mus musculus OX=10090 GN=Lyar PE=1 SV=2
106	74	Q9Z1X4|ILF3_MOUSE	299.58	33	33	179560	24	24	79	Carbamidomethylation; Oxidation (M); Deamidation (NQ)	96021	Interleukin enhancer-binding factor 3 OS=Mus musculus OX=10090 GN=Ilf3 PE=1 SV=2
43	75	O88569|ROA2_MOUSE	299.4	59	59	778080	19	19	167	Carbamidomethylation; Oxidation (M); Acetylation (Protein N-term); Deamidation (NQ)	37403	Heterogeneous nuclear ribonucleoproteins A2/B1 OS=Mus musculus OX=10090 GN=Hnrnpa2b1 PE=1 SV=2
56	277	P43276|H15_MOUSE	298.85	39	39	1791800	16	12	143	Acetylation (Protein N-term); Deamidation (NQ)	22576	Histone H1.5 OS=Mus musculus OX=10090 GN=H1-5 PE=1 SV=2
165	36	Q99NB9|SF3B1_MOUSE	298.25	25	25	42179	25	25	52	Carbamidomethylation; Oxidation (M); Deamidation (NQ)	145816	Splicing factor 3B subunit 1 OS=Mus musculus OX=10090 GN=Sf3b1 PE=1 SV=1
120	55	P20029|BIP_MOUSE	297.67	40	40	96806	23	21	70	Deamidation (NQ)	72422	Endoplasmic reticulum chaperone BiP OS=Mus musculus OX=10090 GN=Hspa5 PE=1 SV=3
109	28	Q7TQH0|ATX2L_MOUSE	297.06	31	31	95337	25	25	78	Carbamidomethylation; Oxidation (M); Acetylation (Protein N-term); Deamidation (NQ)	110649	Ataxin-2-like protein OS=Mus musculus OX=10090 GN=Atxn2l PE=1 SV=1
119	53	Q9DBR7|MYPT1_MOUSE	296.32	27	27	143740	28	28	70	Carbamidomethylation; Oxidation (M)	114996	Protein phosphatase 1 regulatory subunit 12A OS=Mus musculus OX=10090 GN=Ppp1r12a PE=1 SV=2
89	67	P38647|GRP75_MOUSE	295.33	39	39	154480	23	23	87	Carbamidomethylation; Oxidation (M); Deamidation (NQ)	73461	Stress-70 protein mitochondrial OS=Mus musculus OX=10090 GN=Hspa9 PE=1 SV=3
163	21	P48678|LMNA_MOUSE	295.06	42	42	42780	26	25	53	Carbamidomethylation; Oxidation (M); Deamidation (NQ)	74238	Prelamin-A/C OS=Mus musculus OX=10090 GN=Lmna PE=1 SV=2
36	276	P43274|H14_MOUSE	294.91	39	39	999150	15	5	185	Acetylation (Protein N-term); Deamidation (NQ)	21977	Histone H1.4 OS=Mus musculus OX=10090 GN=H1-4 PE=1 SV=2
25	275	P43277|H13_MOUSE	294.07	39	39	467060	15	3	210	Acetylation (Protein N-term); Deamidation (NQ)	22100	Histone H1.3 OS=Mus musculus OX=10090 GN=H1-3 PE=1 SV=2
68	109	Q8K363|DDX18_MOUSE	294.02	35	35	156780	22	22	127	Carbamidomethylation; Oxidation (M); Deamidation (NQ)	74181	ATP-dependent RNA helicase DDX18 OS=Mus musculus OX=10090 GN=Ddx18 PE=1 SV=1
57	182	Q8BG05|ROA3_MOUSE	293.79	42	42	611390	17	17	139	Carbamidomethylation; Oxidation (M); Acetylation (Protein N-term); Deamidation (NQ)	39652	Heterogeneous nuclear ribonucleoprotein A3 OS=Mus musculus OX=10090 GN=Hnrnpa3 PE=1 SV=1
112	320	Q8BVY0|RL1D1_MOUSE	293.54	40	40	630870	20	20	75	Carbamidomethylation; Oxidation (M); Deamidation (NQ)	50421	Ribosomal L1 domain-containing protein 1 OS=Mus musculus OX=10090 GN=Rsl1d1 PE=1 SV=1
248	19	P39447|ZO1_MOUSE	293.18	17	17	30677	23	23	33	Deamidation (NQ)	194740	Tight junction protein ZO-1 OS=Mus musculus OX=10090 GN=Tjp1 PE=1 SV=2
147	137	Q6DFW4|NOP58_MOUSE	293.15	36	36	103760	17	17	59	Carbamidomethylation; Oxidation (M); Deamidation (NQ)	60343	Nucleolar protein 58 OS=Mus musculus OX=10090 GN=Nop58 PE=1 SV=1
50	47	P97351|RS3A_MOUSE	292.13	66	66	514470	20	20	156	Carbamidomethylation; Oxidation (M); Deamidation (NQ)	29885	40S ribosomal protein S3a OS=Mus musculus OX=10090 GN=Rps3a PE=1 SV=3
26	113	P99024|TBB5_MOUSE	291.97	64	64	85749	20	3	206	Carbamidomethylation; Oxidation (M); Deamidation (NQ)	49671	Tubulin beta-5 chain OS=Mus musculus OX=10090 GN=Tubb5 PE=1 SV=1
94	136	Q8K310|MATR3_MOUSE	290.98	30	30	205940	21	21	84	Carbamidomethylation; Oxidation (M); Acetylation (Protein N-term); Deamidation (NQ)	94630	Matrin-3 OS=Mus musculus OX=10090 GN=Matr3 PE=1 SV=1
142	45	Q3TLH4|PRC2C_MOUSE	290.49	12	12	26191	28	28	61	Carbamidomethylation; Oxidation (M); Deamidation (NQ)	310891	Protein PRRC2C OS=Mus musculus OX=10090 GN=Prrc2c PE=1 SV=3
66	118	P21107|TPM3_MOUSE	290.28	51	51	101930	21	6	128	Oxidation (M); Deamidation (NQ)	32994	Tropomyosin alpha-3 chain OS=Mus musculus OX=10090 GN=Tpm3 PE=1 SV=3
131	65	E9Q634|MYO1E_MOUSE	288.95	27	27	54421	28	28	66	Carbamidomethylation; Oxidation (M); Deamidation (NQ)	126818	Unconventional myosin-Ie OS=Mus musculus OX=10090 GN=Myo1e PE=1 SV=1
137	70	Q5F2E7|NUFP2_MOUSE	287.57	33	33	94014	18	18	64	Carbamidomethylation; Oxidation (M); Deamidation (NQ)	75657	Nuclear fragile X mental retardation-interacting protein 2 OS=Mus musculus OX=10090 GN=Nufip2 PE=1 SV=1
23	200	P15864|H12_MOUSE	287.46	41	41	437620	14	4	227	Acetylation (Protein N-term); Deamidation (NQ)	21267	Histone H1.2 OS=Mus musculus OX=10090 GN=H1-2 PE=1 SV=2
186	135	Q9EPU0|RENT1_MOUSE	286.8	24	24	31736	22	22	45	Carbamidomethylation; Oxidation (M); Deamidation (NQ)	123967	Regulator of nonsense transcripts 1 OS=Mus musculus OX=10090 GN=Upf1 PE=1 SV=2
47	114	P68372|TBB4B_MOUSE	285.44	64	64	37040	20	2	165	Carbamidomethylation; Oxidation (M); Deamidation (NQ)	49831	Tubulin beta-4B chain OS=Mus musculus OX=10090 GN=Tubb4b PE=1 SV=1
171	62	Q9Z277|BAZ1B_MOUSE	284.94	17	17	25803	24	24	49	Carbamidomethylation; Oxidation (M)	170650	Tyrosine-protein kinase BAZ1B OS=Mus musculus OX=10090 GN=Baz1b PE=1 SV=2
182	101	Q5XG71|UTP20_MOUSE	284.79	11	11	20910	25	25	46	Carbamidomethylation; Deamidation (NQ)	317744	Small subunit processome component 20 homolog OS=Mus musculus OX=10090 GN=Utp20 PE=1 SV=2
118	195	Q91VR5|DDX1_MOUSE	284.39	34	34	70649	21	21	70	Carbamidomethylation; Oxidation (M); Deamidation (NQ)	82500	ATP-dependent RNA helicase DDX1 OS=Mus musculus OX=10090 GN=Ddx1 PE=1 SV=1
183	97	Q91YR7|PRP6_MOUSE	283.91	28	28	57859	24	24	46	Carbamidomethylation; Oxidation (M); Deamidation (NQ)	106722	Pre-mRNA-processing factor 6 OS=Mus musculus OX=10090 GN=Prpf6 PE=1 SV=1
127	99	Q8CI11|GNL3_MOUSE	282.84	43	43	77088	22	22	67	Carbamidomethylation; Oxidation (M); Deamidation (NQ)	60787	Guanine nucleotide-binding protein-like 3 OS=Mus musculus OX=10090 GN=Gnl3 PE=1 SV=2
140	84	Q91YK2|RRP1B_MOUSE	282.74	33	33	50490	20	20	62	Carbamidomethylation; Oxidation (M); Acetylation (Protein N-term); Deamidation (NQ)	80582	Ribosomal RNA processing protein 1 homolog B OS=Mus musculus OX=10090 GN=Rrp1b PE=1 SV=2
84	35	Q91VX2|UBAP2_MOUSE	282.23	25	25	113590	16	16	93	Carbamidomethylation; Oxidation (M); Deamidation (NQ)	117966	Ubiquitin-associated protein 2 OS=Mus musculus OX=10090 GN=Ubap2 PE=1 SV=1
148	41	Q9Z315|SNUT1_MOUSE	282.05	29	29	200840	20	20	59	Carbamidomethylation; Oxidation (M)	90885	U4/U6.U5 tri-snRNP-associated protein 1 OS=Mus musculus OX=10090 GN=Sart1 PE=1 SV=1
207	56	A2BH40|ARI1A_MOUSE	281.41	12	12	11814	21	19	40	Carbamidomethylation; Oxidation (M); Acetylation (Protein N-term)	242089	AT-rich interactive domain-containing protein 1A OS=Mus musculus OX=10090 GN=Arid1a PE=1 SV=1
117	201	Q9ESX5|DKC1_MOUSE	281.35	37	37	115340	16	16	72	Carbamidomethylation; Oxidation (M); Acetylation (Protein N-term); Deamidation (NQ)	57402	H/ACA ribonucleoprotein complex subunit DKC1 OS=Mus musculus OX=10090 GN=Dkc1 PE=1 SV=4
192	31	Q91ZW3|SMCA5_MOUSE	280.85	23	23	50467	20	20	43	Carbamidomethylation; Oxidation (M); Acetylation (Protein N-term)	121627	SWI/SNF-related matrix-associated actin-dependent regulator of chromatin subfamily A member 5 OS=Mus musculus OX=10090 GN=Smarca5 PE=1 SV=1
262	33	Q8BTI8|SRRM2_MOUSE	280.64	9	9	28430	17	17	31	Carbamidomethylation; Oxidation (M); Deamidation (NQ)	294841	Serine/arginine repetitive matrix protein 2 OS=Mus musculus OX=10090 GN=Srrm2 PE=1 SV=3
69	446	P14148|RL7_MOUSE	280.13	49	49	615140	20	20	126	Oxidation (M); Acetylation (Protein N-term); Deamidation (NQ)	31420	60S ribosomal protein L7 OS=Mus musculus OX=10090 GN=Rpl7 PE=1 SV=2
226	130	Q8CH25|SLTM_MOUSE	279.01	20	20	64026	19	19	35	Carbamidomethylation; Oxidation (M); Acetylation (Protein N-term)	116920	SAFB-like transcription modulator OS=Mus musculus OX=10090 GN=Sltm PE=1 SV=1
139	29	Q80WJ7|LYRIC_MOUSE	278.55	37	37	78742	17	17	62	Deamidation (NQ)	63846	Protein LYRIC OS=Mus musculus OX=10090 GN=Mtdh PE=1 SV=1
37	112	Q7TMM9|TBB2A_MOUSE	278.38	55	55	5376.8	18	1	177	Carbamidomethylation; Oxidation (M); Deamidation (NQ)	49907	Tubulin beta-2A chain OS=Mus musculus OX=10090 GN=Tubb2a PE=1 SV=1
38	92	Q9CWF2|TBB2B_MOUSE	278.06	55	55	6432.9	18	1	176	Carbamidomethylation; Oxidation (M); Deamidation (NQ)	49953	Tubulin beta-2B chain OS=Mus musculus OX=10090 GN=Tubb2b PE=1 SV=1
178	106	Q6P5B0|RRP12_MOUSE	277.72	19	19	61344	19	19	48	Carbamidomethylation; Oxidation (M); Deamidation (NQ)	143131	RRP12-like protein OS=Mus musculus OX=10090 GN=Rrp12 PE=1 SV=1
159	79	Q8K224|NAT10_MOUSE	276.23	27	27	44441	24	24	54	Carbamidomethylation; Oxidation (M); Deamidation (NQ)	115418	RNA cytidine acetyltransferase OS=Mus musculus OX=10090 GN=Nat10 PE=1 SV=1
88	141	Q99LF4|RTCB_MOUSE	276.18	43	43	109200	18	18	88	Carbamidomethylation; Oxidation (M); Deamidation (NQ)	55249	RNA-splicing ligase RtcB homolog OS=Mus musculus OX=10090 GN=Rtcb PE=1 SV=1
45	412	P43275|H11_MOUSE	275.7	45	45	754330	14	12	166	Acetylation (Protein N-term); Deamidation (NQ)	21785	Histone H1.1 OS=Mus musculus OX=10090 GN=H1-1 PE=1 SV=2
16	406	O35737|HNRH1_MOUSE	275.44	42	42	319120	13	7	258	Carbamidomethylation; Oxidation (M); Acetylation (Protein N-term); Deamidation (NQ)	49199	Heterogeneous nuclear ribonucleoprotein H OS=Mus musculus OX=10090 GN=Hnrnph1 PE=1 SV=3
108	96	Q6IRU2|TPM4_MOUSE	275.15	65	65	158720	20	18	78	Carbamidomethylation; Oxidation (M); Acetylation (Protein N-term); Deamidation (NQ)	28468	Tropomyosin alpha-4 chain OS=Mus musculus OX=10090 GN=Tpm4 PE=1 SV=3
189	152	Q9R0I7|YLPM1_MOUSE	274.56	16	16	31584	17	17	44	Oxidation (M); Deamidation (NQ)	155129	YLP motif-containing protein 1 OS=Mus musculus OX=10090 GN=Ylpm1 PE=2 SV=2
145	24	Q80U93|NU214_MOUSE	274.29	13	13	45081	20	20	60	Carbamidomethylation; Oxidation (M)	212977	Nuclear pore complex protein Nup214 OS=Mus musculus OX=10090 GN=Nup214 PE=1 SV=2
206	30	Q9JKF1|IQGA1_MOUSE	273.91	19	19	13155	25	25	40	Carbamidomethylation; Oxidation (M)	188741	Ras GTPase-activating-like protein IQGAP1 OS=Mus musculus OX=10090 GN=Iqgap1 PE=1 SV=2
154	57	Q921M3|SF3B3_MOUSE	272.99	22	22	107130	22	22	56	Carbamidomethylation; Oxidation (M); Deamidation (NQ)	135550	Splicing factor 3B subunit 3 OS=Mus musculus OX=10090 GN=Sf3b3 PE=1 SV=1
105	223	Q8C854|MYEF2_MOUSE	272.14	33	33	130670	17	17	81	Carbamidomethylation; Oxidation (M); Acetylation (Protein N-term); Deamidation (NQ)	63295	Myelin expression factor 2 OS=Mus musculus OX=10090 GN=Myef2 PE=1 SV=1
170	110	Q3TKT4|SMCA4_MOUSE	271.22	15	15	30491	23	23	49	Carbamidomethylation; Oxidation (M); Deamidation (NQ)	181426	Transcription activator BRG1 OS=Mus musculus OX=10090 GN=Smarca4 PE=1 SV=1
236	32	O88532|ZFR_MOUSE	271.15	23	23	22547	17	17	34	Carbamidomethylation; Oxidation (M); Deamidation (NQ)	116859	Zinc finger RNA-binding protein OS=Mus musculus OX=10090 GN=Zfr PE=1 SV=2
232	147	Q9ESV0|DDX24_MOUSE	271.12	23	23	27718	16	16	35	Carbamidomethylation; Oxidation (M)	96429	ATP-dependent RNA helicase DDX24 OS=Mus musculus OX=10090 GN=Ddx24 PE=1 SV=2
101	140	P61979|HNRPK_MOUSE	271.09	38	38	283580	17	17	82	Carbamidomethylation; Oxidation (M); Deamidation (NQ)	50976	Heterogeneous nuclear ribonucleoprotein K OS=Mus musculus OX=10090 GN=Hnrnpk PE=1 SV=1
30	961	P27659|RL3_MOUSE	270.18	41	41	323400	17	17	195	Carbamidomethylation; Oxidation (M); Deamidation (NQ)	46110	60S ribosomal protein L3 OS=Mus musculus OX=10090 GN=Rpl3 PE=1 SV=3
247	372	Q64511|TOP2B_MOUSE	270.04	17	17	8309	21	15	33		181908	DNA topoisomerase 2-beta OS=Mus musculus OX=10090 GN=Top2b PE=1 SV=2
11	133	Q60605|MYL6_MOUSE	269.36	93	93	1725700	13	9	384	Carbamidomethylation; Oxidation (M); Acetylation (Protein N-term); Deamidation (NQ)	16930	Myosin light polypeptide 6 OS=Mus musculus OX=10090 GN=Myl6 PE=1 SV=3
144	81	Q9CZU3|MTREX_MOUSE	269.29	24	24	48213	20	20	60	Carbamidomethylation; Oxidation (M)	117636	Exosome RNA helicase MTR4 OS=Mus musculus OX=10090 GN=Mtrex PE=1 SV=1
229	168	O08784|TCOF_MOUSE	269.02	20	20	19989	20	20	35	Deamidation (NQ)	135001	Treacle protein OS=Mus musculus OX=10090 GN=Tcof1 PE=1 SV=1
164	88	P11499|HS90B_MOUSE	268.94	30	30	28952	18	9	53	Oxidation (M); Deamidation (NQ)	83281	Heat shock protein HSP 90-beta OS=Mus musculus OX=10090 GN=Hsp90ab1 PE=1 SV=3
384	950	Q9ERU9|RBP2_MOUSE	268.91	7	7	10702	16	16	19	Carbamidomethylation	341122	E3 SUMO-protein ligase RanBP2 OS=Mus musculus OX=10090 GN=Ranbp2 PE=1 SV=2
235	76	Q7TSC1|PRC2A_MOUSE	268.88	16	16	17644	21	21	34	Oxidation (M)	229200	Protein PRRC2A OS=Mus musculus OX=10090 GN=Prrc2a PE=1 SV=1
188	121	O08810|U5S1_MOUSE	268.17	23	23	27133	19	19	45	Carbamidomethylation; Oxidation (M)	109361	116 kDa U5 small nuclear ribonucleoprotein component OS=Mus musculus OX=10090 GN=Eftud2 PE=1 SV=1
107	351	Q9JKB3|YBOX3_MOUSE	267.67	46	46	60774	14	9	78	Oxidation (M); Acetylation (Protein N-term); Deamidation (NQ)	38814	Y-box-binding protein 3 OS=Mus musculus OX=10090 GN=Ybx3 PE=1 SV=2
227	34	Q8BKI2|TNR6B_MOUSE	267.53	15	15	8573.4	19	19	35	Carbamidomethylation; Oxidation (M); Deamidation (NQ)	191962	Trinucleotide repeat-containing gene 6B protein OS=Mus musculus OX=10090 GN=Tnrc6b PE=1 SV=2
211	69	G5E870|TRIPC_MOUSE	267.12	14	14	24372	20	20	38	Carbamidomethylation; Oxidation (M); Deamidation (NQ)	224126	E3 ubiquitin-protein ligase TRIP12 OS=Mus musculus OX=10090 GN=Trip12 PE=1 SV=1
51	523	P14869|RLA0_MOUSE	265.31	56	56	528910	14	14	153	Carbamidomethylation; Oxidation (M); Deamidation (NQ)	34216	60S acidic ribosomal protein P0 OS=Mus musculus OX=10090 GN=Rplp0 PE=1 SV=3
253	189	Q8BSQ9|PB1_MOUSE	264.94	12	12	10752	17	17	32	Carbamidomethylation; Oxidation (M); Deamidation (NQ)	187187	Protein polybromo-1 OS=Mus musculus OX=10090 GN=Pbrm1 PE=1 SV=4
281	42	E9Q5G3|KIF23_MOUSE	263.13	23	23	15044	16	16	28	Carbamidomethylation; Oxidation (M); Deamidation (NQ)	108776	Kinesin-like protein KIF23 OS=Mus musculus OX=10090 GN=Kif23 PE=1 SV=1
115	236	P49312|ROA1_MOUSE	262.57	39	39	288540	12	12	73	Carbamidomethylation; Oxidation (M); Acetylation (Protein N-term); Deamidation (NQ)	34196	Heterogeneous nuclear ribonucleoprotein A1 OS=Mus musculus OX=10090 GN=Hnrnpa1 PE=1 SV=2
278	54	Q8K4G5|ABLM1_MOUSE	262.31	24	24	23032	17	17	29	Carbamidomethylation; Oxidation (M); Deamidation (NQ)	96805	Actin-binding LIM protein 1 OS=Mus musculus OX=10090 GN=Ablim1 PE=1 SV=1
252	128	Q6Y7W8|GGYF2_MOUSE	262.29	19	19	18454	18	18	32	Carbamidomethylation; Oxidation (M); Acetylation (Protein N-term); Deamidation (NQ)	149192	GRB10-interacting GYF protein 2 OS=Mus musculus OX=10090 GN=Gigyf2 PE=1 SV=2
158	82	Q8R081|HNRPL_MOUSE	261.97	36	36	56917	13	13	55	Carbamidomethylation; Oxidation (M); Deamidation (NQ)	63964	Heterogeneous nuclear ribonucleoprotein L OS=Mus musculus OX=10090 GN=Hnrnpl PE=1 SV=2
218	404	Q9CYA6|ZCHC8_MOUSE	261.87	23	23	18561	11	11	37	Carbamidomethylation; Oxidation (M); Deamidation (NQ)	78026	Zinc finger CCHC domain-containing protein 8 OS=Mus musculus OX=10090 GN=Zcchc8 PE=1 SV=3
233	171	Q0VBL3|RBM15_MOUSE	261.39	22	22	19461	17	17	35	Deamidation (NQ)	105722	RNA-binding protein 15 OS=Mus musculus OX=10090 GN=Rbm15 PE=1 SV=1
204	205	P52480|KPYM_MOUSE	260	40	40	18888	14	14	41	Carbamidomethylation; Deamidation (NQ)	57845	Pyruvate kinase PKM OS=Mus musculus OX=10090 GN=Pkm PE=1 SV=4
240	125	Q9EPU4|CPSF1_MOUSE	259.72	12	12	28808	14	14	34	Carbamidomethylation; Oxidation (M)	160818	Cleavage and polyadenylation specificity factor subunit 1 OS=Mus musculus OX=10090 GN=Cpsf1 PE=1 SV=1
71	308	P68369|TBA1A_MOUSE	259.36	40	40	4430.7	12	1	119	Carbamidomethylation; Oxidation (M); Deamidation (NQ)	50136	Tubulin alpha-1A chain OS=Mus musculus OX=10090 GN=Tuba1a PE=1 SV=1
249	63	P58252|EF2_MOUSE	258.75	23	23	22829	17	17	33	Carbamidomethylation; Oxidation (M)	95314	Elongation factor 2 OS=Mus musculus OX=10090 GN=Eef2 PE=1 SV=2
266	104	P30999|CTND1_MOUSE	257.94	22	22	15531	16	16	30	Carbamidomethylation; Oxidation (M); Acetylation (Protein N-term); Deamidation (NQ)	104925	Catenin delta-1 OS=Mus musculus OX=10090 GN=Ctnnd1 PE=1 SV=2
48	211	Q9ERD7|TBB3_MOUSE	256.46	39	39	1276	14	3	162	Carbamidomethylation; Oxidation (M); Deamidation (NQ)	50419	Tubulin beta-3 chain OS=Mus musculus OX=10090 GN=Tubb3 PE=1 SV=1
76	428	P47911|RL6_MOUSE	255.62	38	38	867550	13	13	113	Oxidation (M); Deamidation (NQ)	33510	60S ribosomal protein L6 OS=Mus musculus OX=10090 GN=Rpl6 PE=1 SV=3
243	515	Q8R1B4|EIF3C_MOUSE	255.1	18	18	21725	15	15	33	Carbamidomethylation; Oxidation (M); Deamidation (NQ)	105531	Eukaryotic translation initiation factor 3 subunit C OS=Mus musculus OX=10090 GN=Eif3c PE=1 SV=1
40	451	Q9Z2X1|HNRPF_MOUSE	255.09	37	37	277930	12	10	168	Carbamidomethylation; Oxidation (M); Acetylation (Protein N-term); Deamidation (NQ)	45730	Heterogeneous nuclear ribonucleoprotein F OS=Mus musculus OX=10090 GN=Hnrnpf PE=1 SV=3
99	297	Q91VM5|RMXL1_MOUSE	254.43	43	43	5852.1	16	4	82	Oxidation (M); Acetylation (Protein N-term); Deamidation (NQ)	42162	RNA binding motif protein X-linked-like-1 OS=Mus musculus OX=10090 GN=Rbmxl1 PE=2 SV=1
197	131	Q7TMK9|HNRPQ_MOUSE	254.26	25	25	50418	14	14	42	Carbamidomethylation; Oxidation (M); Deamidation (NQ)	69633	Heterogeneous nuclear ribonucleoprotein Q OS=Mus musculus OX=10090 GN=Syncrip PE=1 SV=2
200	157	Q99ME9|NOG1_MOUSE	253.83	34	34	43209	19	19	42	Carbamidomethylation; Oxidation (M)	74113	Nucleolar GTP-binding protein 1 OS=Mus musculus OX=10090 GN=Gtpbp4 PE=1 SV=3
175	303	P17182|ENOA_MOUSE	253.75	36	36	28579	13	11	48	Carbamidomethylation	47141	Alpha-enolase OS=Mus musculus OX=10090 GN=Eno1 PE=1 SV=3
61	293	P62702|RS4X_MOUSE	253.4	48	48	368780	14	14	133	Carbamidomethylation; Oxidation (M); Deamidation (NQ)	29598	40S ribosomal protein S4 X isoform OS=Mus musculus OX=10090 GN=Rps4x PE=1 SV=2
73	286	P25444|RS2_MOUSE	252.86	48	48	371400	13	13	118	Carbamidomethylation; Oxidation (M); Acetylation (Protein N-term); Deamidation (NQ)	31231	40S ribosomal protein S2 OS=Mus musculus OX=10090 GN=Rps2 PE=1 SV=3
63	843	P70333|HNRH2_MOUSE	252.86	35	35	66673	10	5	131	Carbamidomethylation; Oxidation (M); Deamidation (NQ)	49280	Heterogeneous nuclear ribonucleoprotein H2 OS=Mus musculus OX=10090 GN=Hnrnph2 PE=1 SV=1
60	273	P62242|RS8_MOUSE	252.13	54	54	1118300	10	10	136	Carbamidomethylation; Deamidation (NQ)	24205	40S ribosomal protein S8 OS=Mus musculus OX=10090 GN=Rps8 PE=1 SV=2
315	345	O35295|PURB_MOUSE	251.88	37	37	29801	8	8	25	Carbamidomethylation; Oxidation (M)	33901	Transcriptional activator protein Pur-beta OS=Mus musculus OX=10090 GN=Purb PE=1 SV=3
453	318	B2RRE7|OTUD4_MOUSE	251.43	14	14	17634	13	13	16	Carbamidomethylation; Deamidation (NQ)	123055	OTU domain-containing protein 4 OS=Mus musculus OX=10090 GN=Otud4 PE=1 SV=1
275	221	Q9JJ28|FLII_MOUSE	250.87	17	17	26474	17	17	29	Carbamidomethylation; Oxidation (M); Acetylation (Protein N-term)	144803	Protein flightless-1 homolog OS=Mus musculus OX=10090 GN=Flii PE=1 SV=1
215	1071	B1AZI6|THOC2_MOUSE	250.24	12	12	23134	15	15	37	Carbamidomethylation; Acetylation (Protein N-term); Deamidation (NQ)	182772	THO complex subunit 2 OS=Mus musculus OX=10090 GN=Thoc2 PE=1 SV=1
217	267	Q99PU8|DHX30_MOUSE	249.37	18	18	22470	19	19	37	Carbamidomethylation; Oxidation (M)	136668	ATP-dependent RNA helicase DHX30 OS=Mus musculus OX=10090 GN=Dhx30 PE=1 SV=1
363	531	Q569Z5|DDX46_MOUSE	249.34	18	18	9391.1	15	15	20	Carbamidomethylation; Oxidation (M)	117448	Probable ATP-dependent RNA helicase DDX46 OS=Mus musculus OX=10090 GN=Ddx46 PE=1 SV=2
116	102	O35286|DHX15_MOUSE	249.19	20	20	50900	13	13	72	Carbamidomethylation; Oxidation (M); Deamidation (NQ)	91007	Pre-mRNA-splicing factor ATP-dependent RNA helicase DHX15 OS=Mus musculus OX=10090 GN=Dhx15 PE=1 SV=2
44	279	P0DP28|CALM3_MOUSE	249.09	70	70	579490	12	12	166	Oxidation (M); Acetylation (Protein N-term); Deamidation (NQ)	16838	Calmodulin-3 OS=Mus musculus OX=10090 GN=Calm3 PE=1 SV=1
44	280	P0DP26|CALM1_MOUSE	249.09	70	70	579490	12	12	166	Oxidation (M); Acetylation (Protein N-term); Deamidation (NQ)	16838	Calmodulin-1 OS=Mus musculus OX=10090 GN=Calm1 PE=1 SV=1
44	278	P0DP27|CALM2_MOUSE	249.09	70	70	579490	12	12	166	Oxidation (M); Acetylation (Protein N-term); Deamidation (NQ)	16838	Calmodulin-2 OS=Mus musculus OX=10090 GN=Calm2 PE=1 SV=1
214	1474	P47915|RL29_MOUSE	249.06	48	48	156710	11	11	38	Deamidation (NQ)	17587	60S ribosomal protein L29 OS=Mus musculus OX=10090 GN=Rpl29 PE=1 SV=2
24	206	Q3THE2|ML12B_MOUSE	248.89	55	55	1104700	10	5	217	Oxidation (M); Acetylation (Protein N-term); Deamidation (NQ)	19779	Myosin regulatory light chain 12B OS=Mus musculus OX=10090 GN=Myl12b PE=1 SV=2
143	123	Q9JHJ0|TMOD3_MOUSE	248.57	38	38	100400	14	14	61	Oxidation (M); Deamidation (NQ)	39503	Tropomodulin-3 OS=Mus musculus OX=10090 GN=Tmod3 PE=1 SV=1
276	49	Q8BYK6|YTHD3_MOUSE	248.21	30	30	39679	12	9	29	Carbamidomethylation; Oxidation (M); Acetylation (Protein N-term); Deamidation (NQ)	63961	YTH domain-containing family protein 3 OS=Mus musculus OX=10090 GN=Ythdf3 PE=1 SV=2
331	52	Q8K1N4|SPAS2_MOUSE	247.24	30	30	21870	13	13	23	Carbamidomethylation; Oxidation (M); Deamidation (NQ)	58956	Spermatogenesis-associated serine-rich protein 2 OS=Mus musculus OX=10090 GN=Spats2 PE=1 SV=1
304	1409	Q9QYR6|MAP1A_MOUSE	246.85	9	9	5568.3	15	15	25	Oxidation (M); Deamidation (NQ)	300139	Microtubule-associated protein 1A OS=Mus musculus OX=10090 GN=Map1a PE=1 SV=2
156	394	Q64337|SQSTM_MOUSE	246.81	42	42	82231	9	9	55	Carbamidomethylation; Oxidation (M); Deamidation (NQ)	48163	Sequestosome-1 OS=Mus musculus OX=10090 GN=Sqstm1 PE=1 SV=1
271	448	Q91VH2|SNX9_MOUSE	246.43	22	22	20072	11	11	30	Deamidation (NQ)	66546	Sorting nexin-9 OS=Mus musculus OX=10090 GN=Snx9 PE=1 SV=1
307	66	Q9Z0U1|ZO2_MOUSE	246.21	14	14	17622	14	14	25	Oxidation (M); Deamidation (NQ)	131280	Tight junction protein ZO-2 OS=Mus musculus OX=10090 GN=Tjp2 PE=1 SV=2
302	360	P97496|SMRC1_MOUSE	245.95	16	16	29236	13	10	26	Carbamidomethylation; Oxidation (M); Acetylation (Protein N-term)	122890	SWI/SNF complex subunit SMARCC1 OS=Mus musculus OX=10090 GN=Smarcc1 PE=1 SV=2
185	215	Q9D824|FIP1_MOUSE	245.57	33	33	80575	12	12	45	Oxidation (M); Deamidation (NQ)	64959	Pre-mRNA 3'-end-processing factor FIP1 OS=Mus musculus OX=10090 GN=Fip1l1 PE=1 SV=1
98	209	P62754|RS6_MOUSE	245.35	44	44	392380	13	13	83	Carbamidomethylation; Oxidation (M); Deamidation (NQ)	28681	40S ribosomal protein S6 OS=Mus musculus OX=10090 GN=Rps6 PE=1 SV=1
277	148	Q7TPR4|ACTN1_MOUSE	244.89	23	23	4144.4	16	10	29	Carbamidomethylation; Oxidation (M); Deamidation (NQ)	103068	Alpha-actinin-1 OS=Mus musculus OX=10090 GN=Actn1 PE=1 SV=1
294	159	Q9WTM5|RUVB2_MOUSE	244.44	33	33	16127	14	14	27	Carbamidomethylation; Oxidation (M)	51113	RuvB-like 2 OS=Mus musculus OX=10090 GN=Ruvbl2 PE=1 SV=3
85	156	Q922F4|TBB6_MOUSE	244.29	40	40	12465	14	5	93	Carbamidomethylation; Oxidation (M); Deamidation (NQ)	50090	Tubulin beta-6 chain OS=Mus musculus OX=10090 GN=Tubb6 PE=1 SV=1
263	90	Q60598|SRC8_MOUSE	243.7	25	25	34125	13	13	31	Deamidation (NQ)	61250	Src substrate cortactin OS=Mus musculus OX=10090 GN=Cttn PE=1 SV=2
323	188	Q6PAQ4|REXO4_MOUSE	243.22	38	38	32072	13	13	24	Carbamidomethylation; Oxidation (M)	47599	RNA exonuclease 4 OS=Mus musculus OX=10090 GN=Rexo4 PE=2 SV=2
225	179	P16546|SPTN1_MOUSE	242.88	11	11	8162.3	23	23	35	Deamidation (NQ)	284596	Spectrin alpha chain non-erythrocytic 1 OS=Mus musculus OX=10090 GN=Sptan1 PE=1 SV=4
82	400	P62264|RS14_MOUSE	242.56	46	46	344960	10	10	95	Oxidation (M); Deamidation (NQ)	16273	40S ribosomal protein S14 OS=Mus musculus OX=10090 GN=Rps14 PE=1 SV=3
335	199	Q61584|FXR1_MOUSE	242.46	22	22	9743	13	11	22	Deamidation (NQ)	76222	Fragile X mental retardation syndrome-related protein 1 OS=Mus musculus OX=10090 GN=Fxr1 PE=1 SV=2
265	116	P46735|MYO1B_MOUSE	242.36	18	18	14049	17	17	30	Carbamidomethylation; Deamidation (NQ)	128564	Unconventional myosin-Ib OS=Mus musculus OX=10090 GN=Myo1b PE=1 SV=3
167	214	Q6PFD9|NUP98_MOUSE	242.35	11	11	59340	16	16	51	Carbamidomethylation; Oxidation (M); Deamidation (NQ)	197239	Nuclear pore complex protein Nup98-Nup96 OS=Mus musculus OX=10090 GN=Nup98 PE=1 SV=2
100	296	P62751|RL23A_MOUSE	242.29	53	53	826760	11	11	82	Oxidation (M); Deamidation (NQ)	17695	60S ribosomal protein L23a OS=Mus musculus OX=10090 GN=Rpl23a PE=1 SV=1
343	231	Q9WU78|PDC6I_MOUSE	242.02	21	21	10118	12	12	22	Carbamidomethylation; Oxidation (M)	96024	Programmed cell death 6-interacting protein OS=Mus musculus OX=10090 GN=Pdcd6ip PE=1 SV=3
339	430	Q9Z2Q2|KNOP1_MOUSE	241.34	28	28	20790	12	12	22	Carbamidomethylation; Oxidation (M)	53846	Lysine-rich nucleolar protein 1 OS=Mus musculus OX=10090 GN=Knop1 PE=1 SV=2
180	163	Q9ERG0|LIMA1_MOUSE	241.06	28	28	36508	16	16	47	Carbamidomethylation; Oxidation (M); Deamidation (NQ)	84060	LIM domain and actin-binding protein 1 OS=Mus musculus OX=10090 GN=Lima1 PE=1 SV=3
305	138	Q00PI9|HNRL2_MOUSE	240.8	21	21	21056	14	14	25	Carbamidomethylation; Oxidation (M); Deamidation (NQ)	84940	Heterogeneous nuclear ribonucleoprotein U-like protein 2 OS=Mus musculus OX=10090 GN=Hnrnpul2 PE=1 SV=2
327	435	Q80U78|PUM1_MOUSE	240.32	12	12	8961.7	12	10	23	Oxidation (M)	126619	Pumilio homolog 1 OS=Mus musculus OX=10090 GN=Pum1 PE=1 SV=2
149	115	P07901|HS90A_MOUSE	240.32	21	21	6738.7	13	5	59	Oxidation (M); Deamidation (NQ)	84788	Heat shock protein HSP 90-alpha OS=Mus musculus OX=10090 GN=Hsp90aa1 PE=1 SV=4
423	603	P58871|TB182_MOUSE	238.98	12	12	26769	13	13	17	Carbamidomethylation	181824	182 kDa tankyrase-1-binding protein OS=Mus musculus OX=10090 GN=Tnks1bp1 PE=1 SV=2
196	117	P47757|CAPZB_MOUSE	237.2	55	55	69320	15	15	42	Carbamidomethylation; Oxidation (M); Acetylation (Protein N-term); Deamidation (NQ)	31345	F-actin-capping protein subunit beta OS=Mus musculus OX=10090 GN=Capzb PE=1 SV=3
203	176	Q07076|ANXA7_MOUSE	236.79	28	28	51885	12	12	41	Carbamidomethylation; Oxidation (M); Deamidation (NQ)	49925	Annexin A7 OS=Mus musculus OX=10090 GN=Anxa7 PE=1 SV=2
153	438	Q9WV02|RBMX_MOUSE	236.66	32	32	458.49	13	1	57	Acetylation (Protein N-term); Deamidation (NQ)	42301	RNA-binding motif protein X chromosome OS=Mus musculus OX=10090 GN=Rbmx PE=1 SV=1
254	1966	Q8R3N6|THOC1_MOUSE	236.66	24	24	25499	14	14	32	Carbamidomethylation; Deamidation (NQ)	75436	THO complex subunit 1 OS=Mus musculus OX=10090 GN=Thoc1 PE=1 SV=1
81	440	P68368|TBA4A_MOUSE	236.45	36	36	3367.3	11	4	97	Carbamidomethylation; Oxidation (M); Deamidation (NQ)	49924	Tubulin alpha-4A chain OS=Mus musculus OX=10090 GN=Tuba4a PE=1 SV=1
338	59	P57780|ACTN4_MOUSE	236.25	18	18	3247.3	12	6	22	Carbamidomethylation; Oxidation (M)	104977	Alpha-actinin-4 OS=Mus musculus OX=10090 GN=Actn4 PE=1 SV=1
333	165	P09405|NUCL_MOUSE	235.57	26	26	38219	13	13	23	Deamidation (NQ)	76723	Nucleolin OS=Mus musculus OX=10090 GN=Ncl PE=1 SV=2
306	210	Q9Z108|STAU1_MOUSE	234.55	29	29	45785	12	12	25	Carbamidomethylation; Oxidation (M); Acetylation (Protein N-term); Deamidation (NQ)	53925	Double-stranded RNA-binding protein Staufen homolog 1 OS=Mus musculus OX=10090 GN=Stau1 PE=1 SV=1
126	819	P41105|RL28_MOUSE	234.42	39	39	277710	9	9	68	Carbamidomethylation; Oxidation (M); Acetylation (Protein N-term); Deamidation (NQ)	15733	60S ribosomal protein L28 OS=Mus musculus OX=10090 GN=Rpl28 PE=1 SV=2
466	487	Q9WVR4|FXR2_MOUSE	234.4	20	20	5564.5	10	8	16	Carbamidomethylation; Deamidation (NQ)	73743	Fragile X mental retardation syndrome-related protein 2 OS=Mus musculus OX=10090 GN=Fxr2 PE=1 SV=1
67	111	P47963|RL13_MOUSE	234.19	39	39	771530	10	10	128	Oxidation (M); Deamidation (NQ)	24305	60S ribosomal protein L13 OS=Mus musculus OX=10090 GN=Rpl13 PE=1 SV=3
155	379	P35550|FBRL_MOUSE	234.01	36	36	125730	10	10	56	Carbamidomethylation; Oxidation (M); Deamidation (NQ)	34307	rRNA 2'-O-methyltransferase fibrillarin OS=Mus musculus OX=10090 GN=Fbl PE=1 SV=2
157	330	P61255|RL26_MOUSE	233.55	48	48	243200	12	12	55	Oxidation (M); Acetylation (Protein N-term); Deamidation (NQ)	17258	60S ribosomal protein L26 OS=Mus musculus OX=10090 GN=Rpl26 PE=1 SV=1
358	169	P63101|1433Z_MOUSE	233.26	40	40	22230	9	7	21	Carbamidomethylation; Oxidation (M); Acetylation (Protein N-term)	27771	14-3-3 protein zeta/delta OS=Mus musculus OX=10090 GN=Ywhaz PE=1 SV=1
223	471	P32067|LA_MOUSE	232.54	33	33	31240	13	13	36	Carbamidomethylation; Oxidation (M); Acetylation (Protein N-term); Deamidation (NQ)	47756	Lupus La protein homolog OS=Mus musculus OX=10090 GN=Ssb PE=1 SV=1
368	540	Q6P9R1|DDX51_MOUSE	232.21	25	25	7115.4	12	12	20	Carbamidomethylation	70368	ATP-dependent RNA helicase DDX51 OS=Mus musculus OX=10090 GN=Ddx51 PE=1 SV=1
176	271	P62908|RS3_MOUSE	232.03	61	61	166860	12	12	48	Carbamidomethylation; Oxidation (M); Deamidation (NQ)	26674	40S ribosomal protein S3 OS=Mus musculus OX=10090 GN=Rps3 PE=1 SV=1
242	212	Q922K7|NOP2_MOUSE	231.91	21	21	26786	12	12	33	Carbamidomethylation; Oxidation (M); Deamidation (NQ)	86752	Probable 28S rRNA (cytosine-C(5))-methyltransferase OS=Mus musculus OX=10090 GN=Nop2 PE=1 SV=1
412	194	Q8VDN2|AT1A1_MOUSE	231.37	16	16	4450.3	12	12	18	Carbamidomethylation	112982	Sodium/potassium-transporting ATPase subunit alpha-1 OS=Mus musculus OX=10090 GN=Atp1a1 PE=1 SV=1
258	100	Q922U2|K2C5_MOUSE	230.83	16	16	16520	15	8	32	Carbamidomethylation; Oxidation (M)	61767	Keratin type II cytoskeletal 5 OS=Mus musculus OX=10090 GN=Krt5 PE=1 SV=1
424	256	Q6A0A9|F120A_MOUSE	230.83	14	14	9617.7	11	11	17	Carbamidomethylation	121646	Constitutive coactivator of PPAR-gamma-like protein 1 OS=Mus musculus OX=10090 GN=FAM120A PE=1 SV=2
337	607	Q6PDG5|SMRC2_MOUSE	230.64	13	13	11389	12	9	22	Carbamidomethylation; Oxidation (M)	132604	SWI/SNF complex subunit SMARCC2 OS=Mus musculus OX=10090 GN=Smarcc2 PE=1 SV=2
287	143	Q7TPW1|NEXN_MOUSE	230.52	28	28	32224	16	16	28	Oxidation (M); Deamidation (NQ)	72108	Nexilin OS=Mus musculus OX=10090 GN=Nexn PE=1 SV=3
113	431	P01867|IGG2B_MOUSE	230.08	36	36	176990	10	10	74	Carbamidomethylation; Oxidation (M); Deamidation (NQ)	44259	Ig gamma-2B chain C region OS=Mus musculus OX=10090 GN=Igh-3 PE=1 SV=3
132	941	Q9CXY6|ILF2_MOUSE	229.51	37	37	58043	11	11	65	Oxidation (M); Deamidation (NQ)	43062	Interleukin enhancer-binding factor 2 OS=Mus musculus OX=10090 GN=Ilf2 PE=1 SV=1
381	1627	Q3UEB3|PUF60_MOUSE	229.33	27	27	16179	12	12	20	Carbamidomethylation; Oxidation (M)	60249	Poly(U)-binding-splicing factor PUF60 OS=Mus musculus OX=10090 GN=Puf60 PE=1 SV=2
316	124	Q62261|SPTB2_MOUSE	229.08	8	8	3103.8	14	14	24		274221	Spectrin beta chain non-erythrocytic 1 OS=Mus musculus OX=10090 GN=Sptbn1 PE=1 SV=2
103	234	P56959|FUS_MOUSE	228.88	17	17	304400	8	8	81	Carbamidomethylation; Oxidation (M); Deamidation (NQ)	52673	RNA-binding protein FUS OS=Mus musculus OX=10090 GN=Fus PE=1 SV=1
295	301	Q9Z130|HNRDL_MOUSE	228.61	33	33	26678	9	8	27	Carbamidomethylation; Oxidation (M); Acetylation (Protein N-term); Deamidation (NQ)	33559	Heterogeneous nuclear ribonucleoprotein D-like OS=Mus musculus OX=10090 GN=Hnrnpdl PE=1 SV=1
282	478	Q3UKC1|TAXB1_MOUSE	228.59	19	19	6341.2	16	16	28	Carbamidomethylation; Oxidation (M); Deamidation (NQ)	93630	Tax1-binding protein 1 homolog OS=Mus musculus OX=10090 GN=Tax1bp1 PE=1 SV=2
342	1116	P23116|EIF3A_MOUSE	228.4	12	12	15324	15	15	22	Oxidation (M)	161936	Eukaryotic translation initiation factor 3 subunit A OS=Mus musculus OX=10090 GN=Eif3a PE=1 SV=5
326	455	O54724|CAVN1_MOUSE	228.03	33	33	19888	11	11	24	Oxidation (M); Deamidation (NQ)	43954	Caveolae-associated protein 1 OS=Mus musculus OX=10090 GN=Cavin1 PE=1 SV=1
309	108	P35601|RFC1_MOUSE	227.86	13	13	13270	11	11	25	Carbamidomethylation; Deamidation (NQ)	125985	Replication factor C subunit 1 OS=Mus musculus OX=10090 GN=Rfc1 PE=1 SV=2
321	447	Q8BK67|RCC2_MOUSE	227.82	23	23	18378	10	10	24	Carbamidomethylation; Deamidation (NQ)	55983	Protein RCC2 OS=Mus musculus OX=10090 GN=Rcc2 PE=1 SV=1
146	580	P62281|RS11_MOUSE	227.67	60	60	260100	13	13	60	Carbamidomethylation; Oxidation (M); Acetylation (Protein N-term); Deamidation (NQ)	18431	40S ribosomal protein S11 OS=Mus musculus OX=10090 GN=Rps11 PE=1 SV=3
216	86	A2AJI0|MA7D1_MOUSE	227.61	21	21	19778	13	13	37	Carbamidomethylation; Oxidation (M); Deamidation (NQ)	93276	MAP7 domain-containing protein 1 OS=Mus musculus OX=10090 GN=Map7d1 PE=1 SV=1
96	585	P35980|RL18_MOUSE	226.87	37	37	858320	9	9	84	Deamidation (NQ)	21645	60S ribosomal protein L18 OS=Mus musculus OX=10090 GN=Rpl18 PE=1 SV=3
102	693	P63276|RS17_MOUSE	226.7	67	67	77829	11	11	82	Carbamidomethylation; Oxidation (M); Deamidation (NQ)	15524	40S ribosomal protein S17 OS=Mus musculus OX=10090 GN=Rps17 PE=1 SV=2
231	541	Q91VE6|MK67I_MOUSE	226.58	41	41	29328	9	9	35	Carbamidomethylation; Acetylation (Protein N-term); Deamidation (NQ)	36265	MKI67 FHA domain-interacting nucleolar phosphoprotein OS=Mus musculus OX=10090 GN=Nifk PE=1 SV=1
130	474	Q9CPR4|RL17_MOUSE	226.1	46	46	326810	9	9	66	Carbamidomethylation; Deamidation (NQ)	21423	60S ribosomal protein L17 OS=Mus musculus OX=10090 GN=Rpl17 PE=1 SV=3
22	348	Q8BFZ3|ACTBL_MOUSE	225.91	36	36	873	9	4	228	Carbamidomethylation; Oxidation (M); Deamidation (NQ)	42004	Beta-actin-like protein 2 OS=Mus musculus OX=10090 GN=Actbl2 PE=1 SV=1
201	415	Q99020|ROAA_MOUSE	225.81	29	29	135490	8	7	42	Carbamidomethylation; Oxidation (M); Deamidation (NQ)	30831	Heterogeneous nuclear ribonucleoprotein A/B OS=Mus musculus OX=10090 GN=Hnrnpab PE=1 SV=1
280	363	Q99MJ9|DDX50_MOUSE	225.72	23	23	10071	15	15	28	Carbamidomethylation; Oxidation (M); Deamidation (NQ)	82176	ATP-dependent RNA helicase DDX50 OS=Mus musculus OX=10090 GN=Ddx50 PE=2 SV=1
370	178	O70305|ATX2_MOUSE	225.53	12	12	11226	10	10	20	Carbamidomethylation; Deamidation (NQ)	136485	Ataxin-2 OS=Mus musculus OX=10090 GN=Atxn2 PE=1 SV=1
308	154	Q01853|TERA_MOUSE	225.37	21	21	4411.1	12	11	25	Carbamidomethylation; Acetylation (Protein N-term)	89322	Transitional endoplasmic reticulum ATPase OS=Mus musculus OX=10090 GN=Vcp PE=1 SV=4
300	727	Q8CIE6|COPA_MOUSE	224.6	15	15	13484	16	16	26	Carbamidomethylation; Deamidation (NQ)	138432	Coatomer subunit alpha OS=Mus musculus OX=10090 GN=Copa PE=1 SV=2
417	294	Q8CAQ8|MIC60_MOUSE	224.27	18	18	6409.2	11	11	18		83900	MICOS complex subunit Mic60 OS=Mus musculus OX=10090 GN=Immt PE=1 SV=1
241	389	Q9Z0H1|WDR46_MOUSE	223.68	22	22	20346	10	10	34	Carbamidomethylation; Oxidation (M); Acetylation (Protein N-term)	69048	WD repeat-containing protein 46 OS=Mus musculus OX=10090 GN=Wdr46 PE=2 SV=1
86	846	P62911|RL32_MOUSE	223.65	53	53	239060	9	9	92	Carbamidomethylation; Oxidation (M); Deamidation (NQ)	15860	60S ribosomal protein L32 OS=Mus musculus OX=10090 GN=Rpl32 PE=1 SV=2
351	226	Q8VH51|RBM39_MOUSE	223.5	20	20	24218	9	9	21	Carbamidomethylation; Oxidation (M); Acetylation (Protein N-term)	59407	RNA-binding protein 39 OS=Mus musculus OX=10090 GN=Rbm39 PE=1 SV=2
283	129	Q8R0X7|SGPL1_MOUSE	223.43	17	17	25084	10	10	28	Carbamidomethylation; Oxidation (M); Deamidation (NQ)	63677	Sphingosine-1-phosphate lyase 1 OS=Mus musculus OX=10090 GN=Sgpl1 PE=1 SV=1
177	269	P16858|G3P_MOUSE	223.4	37	37	65531	9	9	48	Carbamidomethylation; Oxidation (M); Deamidation (NQ)	35810	Glyceraldehyde-3-phosphate dehydrogenase OS=Mus musculus OX=10090 GN=Gapdh PE=1 SV=2
301	1690	Q60875|ARHG2_MOUSE	223.25	19	19	5246.5	14	14	26	Carbamidomethylation; Oxidation (M); Deamidation (NQ)	111974	Rho guanine nucleotide exchange factor 2 OS=Mus musculus OX=10090 GN=Arhgef2 PE=1 SV=4
366	525	B1AQJ2|UBP36_MOUSE	223.04	13	13	6417.2	10	10	20	Carbamidomethylation	119913	Ubiquitin carboxyl-terminal hydrolase 36 OS=Mus musculus OX=10090 GN=Usp36 PE=1 SV=1
389	98	P14873|MAP1B_MOUSE	222.78	8	8	3267.2	11	11	19	Carbamidomethylation; Oxidation (M); Acetylation (Protein N-term); Deamidation (NQ)	270252	Microtubule-associated protein 1B OS=Mus musculus OX=10090 GN=Map1b PE=1 SV=2
187	396	P52927|HMGA2_MOUSE	222.41	61	61	132260	7	7	45	Carbamidomethylation; Acetylation (Protein N-term); Deamidation (NQ)	11819	High mobility group protein HMGI-C OS=Mus musculus OX=10090 GN=Hmga2 PE=1 SV=1
427	87	Q61464|ZN638_MOUSE	221.67	8	8	5427	12	12	17	Oxidation (M)	218132	Zinc finger protein 638 OS=Mus musculus OX=10090 GN=Znf638 PE=1 SV=2
365	1121	Q99LH1|NOG2_MOUSE	221.18	20	20	8751.2	12	12	20	Carbamidomethylation; Oxidation (M)	83346	Nucleolar GTP-binding protein 2 OS=Mus musculus OX=10090 GN=Gnl2 PE=1 SV=2
296	443	Q76KJ5|RPA34_MOUSE	221.16	30	30	17261	9	9	27	Carbamidomethylation; Oxidation (M)	43082	DNA-directed RNA polymerase I subunit RPA34 OS=Mus musculus OX=10090 GN=Cd3eap PE=1 SV=2
199	392	Q5SWD9|TSR1_MOUSE	221.1	15	15	17717	9	9	42	Oxidation (M)	92105	Pre-rRNA-processing protein TSR1 homolog OS=Mus musculus OX=10090 GN=Tsr1 PE=1 SV=1
228	566	Q8R5K4|NOL6_MOUSE	220.92	15	15	13569	14	14	35	Carbamidomethylation; Oxidation (M)	129228	Nucleolar protein 6 OS=Mus musculus OX=10090 GN=Nol6 PE=2 SV=2
431	16726	Q9DBE9|SPB1_MOUSE	220.89	14	14	8083.6	10	10	17		95532	pre-rRNA 2'-O-ribose RNA methyltransferase FTSJ3 OS=Mus musculus OX=10090 GN=Ftsj3 PE=1 SV=1
435	413	Q61753|SERA_MOUSE	220.78	22	22	11706	9	9	17	Carbamidomethylation	56586	D-3-phosphoglycerate dehydrogenase OS=Mus musculus OX=10090 GN=Phgdh PE=1 SV=3
135	814	P62717|RL18A_MOUSE	220.51	33	33	363900	7	7	65	Carbamidomethylation; Deamidation (NQ)	20732	60S ribosomal protein L18a OS=Mus musculus OX=10090 GN=Rpl18a PE=1 SV=1
497	290	Q9D4J7|PHF6_MOUSE	220.37	35	35	16891	10	10	15	Carbamidomethylation; Oxidation (M); Deamidation (NQ)	41139	PHD finger protein 6 OS=Mus musculus OX=10090 GN=Phf6 PE=1 SV=1
168	371	P10126|EF1A1_MOUSE	219.91	27	27	91519	9	9	51	Carbamidomethylation; Oxidation (M)	50114	Elongation factor 1-alpha 1 OS=Mus musculus OX=10090 GN=Eef1a1 PE=1 SV=3
91	808	P35979|RL12_MOUSE	219.85	55	55	283070	6	6	86	Carbamidomethylation; Deamidation (NQ)	17805	60S ribosomal protein L12 OS=Mus musculus OX=10090 GN=Rpl12 PE=1 SV=2
53	292	Q9CQ19|MYL9_MOUSE	219.81	51	51	18502	7	2	150	Oxidation (M); Acetylation (Protein N-term); Deamidation (NQ)	19854	Myosin regulatory light polypeptide 9 OS=Mus musculus OX=10090 GN=Myl9 PE=1 SV=3
311	145	Q8VIJ6|SFPQ_MOUSE	219.59	17	17	36167	11	11	25	Oxidation (M); Deamidation (NQ)	75442	Splicing factor proline- and glutamine-rich OS=Mus musculus OX=10090 GN=Sfpq PE=1 SV=1
334	85	Q640M1|UT14A_MOUSE	219.42	18	18	13962	10	10	22	Oxidation (M)	87265	U3 small nucleolar RNA-associated protein 14 homolog A OS=Mus musculus OX=10090 GN=Utp14a PE=1 SV=1
134	811	P99027|RLA2_MOUSE	219.38	95	95	133780	8	8	65	Oxidation (M); Deamidation (NQ)	11651	60S acidic ribosomal protein P2 OS=Mus musculus OX=10090 GN=Rplp2 PE=1 SV=3
244	246	O70551|SRPK1_MOUSE	219.25	25	25	13773	11	11	33	Carbamidomethylation; Oxidation (M); Deamidation (NQ)	73089	SRSF protein kinase 1 OS=Mus musculus OX=10090 GN=Srpk1 PE=1 SV=2
391	835	Q9DBD5|PELP1_MOUSE	219.18	13	13	19209	9	9	19	Carbamidomethylation; Oxidation (M); Acetylation (Protein N-term)	118069	Proline- glutamic acid- and leucine-rich protein 1 OS=Mus musculus OX=10090 GN=Pelp1 PE=1 SV=2
110	213	P62983|RS27A_MOUSE	219	56	56	204240	7	7	77	Carbamidomethylation; Oxidation (M); Deamidation (NQ)	17951	Ubiquitin-40S ribosomal protein S27a OS=Mus musculus OX=10090 GN=Rps27a PE=1 SV=2
245	229	Q8VDM6|HNRL1_MOUSE	218.8	16	16	23180	12	12	33	Carbamidomethylation; Oxidation (M); Deamidation (NQ)	96002	Heterogeneous nuclear ribonucleoprotein U-like protein 1 OS=Mus musculus OX=10090 GN=Hnrnpul1 PE=1 SV=1
400	198	Q9QX47|SON_MOUSE	218.47	6	6	5914.5	11	11	18	Carbamidomethylation; Oxidation (M); Acetylation (Protein N-term); Deamidation (NQ)	265649	Protein SON OS=Mus musculus OX=10090 GN=Son PE=1 SV=2
336	132	Q8K4P0|WDR33_MOUSE	218.34	13	13	10204	14	14	22	Carbamidomethylation; Oxidation (M)	145267	pre-mRNA 3' end processing protein WDR33 OS=Mus musculus OX=10090 GN=Wdr33 PE=1 SV=1
350	164	Q03265|ATPA_MOUSE	217.9	21	21	19692	9	9	22	Oxidation (M)	59753	ATP synthase subunit alpha mitochondrial OS=Mus musculus OX=10090 GN=Atp5f1a PE=1 SV=1
420	252	Q05CL8|LARP7_MOUSE	217.84	20	20	19866	11	11	17		64802	La-related protein 7 OS=Mus musculus OX=10090 GN=Larp7 PE=1 SV=2
332	529	P09103|PDIA1_MOUSE	216.58	23	23	11284	11	11	23	Oxidation (M)	57059	Protein disulfide-isomerase OS=Mus musculus OX=10090 GN=P4hb PE=1 SV=2
501	454	Q8BMA6|SRP68_MOUSE	216.18	15	15	4920.3	10	10	14	Carbamidomethylation	70574	Signal recognition particle subunit SRP68 OS=Mus musculus OX=10090 GN=Srp68 PE=1 SV=2
198	825	P56480|ATPB_MOUSE	216.14	37	37	15304	14	14	42	Oxidation (M)	56301	ATP synthase subunit beta mitochondrial OS=Mus musculus OX=10090 GN=Atp5f1b PE=1 SV=2
250	336	Q9CWX9|DDX47_MOUSE	215.98	41	41	22854	13	13	33	Carbamidomethylation; Oxidation (M); Acetylation (Protein N-term)	50639	Probable ATP-dependent RNA helicase DDX47 OS=Mus musculus OX=10090 GN=Ddx47 PE=2 SV=2
325	126	Q91YT7|YTHD2_MOUSE	215.67	23	23	26978	9	6	24	Carbamidomethylation; Oxidation (M); Acetylation (Protein N-term); Deamidation (NQ)	62280	YTH domain-containing family protein 2 OS=Mus musculus OX=10090 GN=Ythdf2 PE=1 SV=1
355	376	Q8C9B9|DIDO1_MOUSE	215.58	8	8	5510	12	12	21	Carbamidomethylation	247173	Death-inducer obliterator 1 OS=Mus musculus OX=10090 GN=Dido1 PE=1 SV=4
364	78	Q5SYD0|MYO1D_MOUSE	214.99	13	13	18665	12	12	20	Carbamidomethylation; Oxidation (M); Acetylation (Protein N-term); Deamidation (NQ)	116081	Unconventional myosin-Id OS=Mus musculus OX=10090 GN=Myo1d PE=1 SV=1
455	253	A2RSY6|TRM1L_MOUSE	214.95	17	17	7381.3	9	9	16	Deamidation (NQ)	80861	TRMT1-like protein OS=Mus musculus OX=10090 GN=Trmt1l PE=1 SV=1
369	27804	Q7TMY4|THOC7_MOUSE	214.83	47	47	13144	10	10	20	Carbamidomethylation; Oxidation (M); Acetylation (Protein N-term); Deamidation (NQ)	23715	THO complex subunit 7 homolog OS=Mus musculus OX=10090 GN=Thoc7 PE=1 SV=2
234	939	O35887|CALU_MOUSE	214.79	29	29	45655	10	10	35	Oxidation (M)	37064	Calumenin OS=Mus musculus OX=10090 GN=Calu PE=1 SV=1
509	203	Q9DAW9|CNN3_MOUSE	214.72	34	34	27719	9	8	14	Carbamidomethylation; Oxidation (M)	36429	Calponin-3 OS=Mus musculus OX=10090 GN=Cnn3 PE=1 SV=1
290	416	Q62318|TIF1B_MOUSE	214.62	18	18	35302	10	10	27	Oxidation (M); Acetylation (Protein N-term)	88847	Transcription intermediary factor 1-beta OS=Mus musculus OX=10090 GN=Trim28 PE=1 SV=3
468	196	Q99KW3|TARA_MOUSE	214.55	5	5	3775.7	9	8	15	Carbamidomethylation	223366	TRIO and F-actin-binding protein OS=Mus musculus OX=10090 GN=Triobp PE=1 SV=3
181	186	P02535|K1C10_MOUSE	214.31	14	14	255110	9	6	47	Oxidation (M); Deamidation (NQ)	57770	Keratin type I cytoskeletal 10 OS=Mus musculus OX=10090 GN=Krt10 PE=1 SV=3
385	232	Q8BVE8|NSD2_MOUSE	213.84	9	9	5563	10	10	19	Carbamidomethylation	152253	Histone-lysine N-methyltransferase NSD2 OS=Mus musculus OX=10090 GN=Nsd2 PE=1 SV=2
221	855	Q9Z204|HNRPC_MOUSE	213.8	31	31	43156	10	10	36	Oxidation (M); Acetylation (Protein N-term); Deamidation (NQ)	34385	Heterogeneous nuclear ribonucleoproteins C1/C2 OS=Mus musculus OX=10090 GN=Hnrnpc PE=1 SV=1
373	924	P47962|RL5_MOUSE	212.73	30	30	23042	10	10	20	Carbamidomethylation; Oxidation (M)	34401	60S ribosomal protein L5 OS=Mus musculus OX=10090 GN=Rpl5 PE=1 SV=3
195	2022	Q9CQE8|RTRAF_MOUSE	212.53	34	34	45108	8	8	43	Oxidation (M); Deamidation (NQ)	28152	RNA transcription translation and transport factor protein OS=Mus musculus OX=10090 GN=RTRAF PE=1 SV=1
352	120	P35922|FMR1_MOUSE	212.53	17	17	9290.7	8	7	21	Acetylation (Protein N-term); Deamidation (NQ)	68989	Synaptic functional regulator FMR1 OS=Mus musculus OX=10090 GN=Fmr1 PE=1 SV=1
285	346	Q8C5L7|RBM34_MOUSE	212.35	37	37	14362	15	15	28	Carbamidomethylation; Deamidation (NQ)	49116	RNA-binding protein 34 OS=Mus musculus OX=10090 GN=Rbm34 PE=1 SV=2
162	1535	Q99KP6|PRP19_MOUSE	212.21	36	36	129310	10	10	53	Carbamidomethylation; Acetylation (Protein N-term); Deamidation (NQ)	55239	Pre-mRNA-processing factor 19 OS=Mus musculus OX=10090 GN=Prpf19 PE=1 SV=1
238	382	P47754|CAZA2_MOUSE	212.15	53	53	36840	10	9	34	Carbamidomethylation; Acetylation (Protein N-term); Deamidation (NQ)	32967	F-actin-capping protein subunit alpha-2 OS=Mus musculus OX=10090 GN=Capza2 PE=1 SV=3
224	177	P70318|TIAR_MOUSE	212.15	22	22	18051	9	5	36	Carbamidomethylation; Oxidation (M); Deamidation (NQ)	43389	Nucleolysin TIAR OS=Mus musculus OX=10090 GN=Tial1 PE=1 SV=1
174	284	P19253|RL13A_MOUSE	211.69	33	33	452930	8	8	49	Carbamidomethylation; Acetylation (Protein N-term); Deamidation (NQ)	23464	60S ribosomal protein L13a OS=Mus musculus OX=10090 GN=Rpl13a PE=1 SV=4
292	160	Q3TTY5|K22E_MOUSE	211.25	7	7	66806	8	5	27	Carbamidomethylation; Oxidation (M)	70923	Keratin type II cytoskeletal 2 epidermal OS=Mus musculus OX=10090 GN=Krt2 PE=1 SV=1
246	260	P17225|PTBP1_MOUSE	210.76	25	25	17799	9	8	33	Carbamidomethylation; Oxidation (M); Acetylation (Protein N-term); Deamidation (NQ)	56478	Polypyrimidine tract-binding protein 1 OS=Mus musculus OX=10090 GN=Ptbp1 PE=1 SV=2
318	583	Q8CEC0|NUP88_MOUSE	210.67	21	21	8346	12	12	24	Carbamidomethylation; Oxidation (M); Deamidation (NQ)	84938	Nuclear pore complex protein Nup88 OS=Mus musculus OX=10090 GN=Nup88 PE=1 SV=1
399	225	Q99NH0|ANR17_MOUSE	210.6	6	6	4774.5	11	11	18	Carbamidomethylation; Deamidation (NQ)	274211	Ankyrin repeat domain-containing protein 17 OS=Mus musculus OX=10090 GN=Ankrd17 PE=1 SV=2
566	1087	Q8VHE0|SEC63_MOUSE	210.45	16	16	6181.2	9	9	12	Carbamidomethylation; Oxidation (M)	87870	Translocation protein SEC63 homolog OS=Mus musculus OX=10090 GN=Sec63 PE=1 SV=4
360	175	Q61029|LAP2B_MOUSE	210.18	28	28	4677.3	8	2	21	Carbamidomethylation	50373	Lamina-associated polypeptide 2 isoforms beta/delta/epsilon/gamma OS=Mus musculus OX=10090 GN=Tmpo PE=1 SV=4
378	398	Q9CYI4|LUC7L_MOUSE	210.13	19	19	15260	6	4	20	Oxidation (M)	43934	Putative RNA-binding protein Luc7-like 1 OS=Mus musculus OX=10090 GN=Luc7l PE=1 SV=2
169	421	P62270|RS18_MOUSE	210.07	54	54	320930	10	10	50	Oxidation (M); Acetylation (Protein N-term); Deamidation (NQ)	17719	40S ribosomal protein S18 OS=Mus musculus OX=10090 GN=Rps18 PE=1 SV=3
439	119	O35218|CPSF2_MOUSE	210.07	16	16	17117	11	11	17	Carbamidomethylation	88383	Cleavage and polyadenylation specificity factor subunit 2 OS=Mus musculus OX=10090 GN=Cpsf2 PE=1 SV=1
442	44	Q8VHX6|FLNC_MOUSE	209.55	6	6	2112.2	11	6	16	Carbamidomethylation	291117	Filamin-C OS=Mus musculus OX=10090 GN=Flnc PE=1 SV=3
121	606	P84099|RL19_MOUSE	209.55	24	24	316590	7	7	70	Oxidation (M); Deamidation (NQ)	23466	60S ribosomal protein L19 OS=Mus musculus OX=10090 GN=Rpl19 PE=1 SV=1
393	459	Q9D0I8|MRT4_MOUSE	209.46	46	46	22044	11	11	19	Carbamidomethylation; Oxidation (M); Deamidation (NQ)	27546	mRNA turnover protein 4 homolog OS=Mus musculus OX=10090 GN=Mrto4 PE=1 SV=1
409	561	Q6PDM2|SRSF1_MOUSE	208.92	35	35	11717	9	9	18	Carbamidomethylation	27745	Serine/arginine-rich splicing factor 1 OS=Mus musculus OX=10090 GN=Srsf1 PE=1 SV=3
324	676	Q99KN9|EPN4_MOUSE	208.89	19	19	17490	9	9	24	Oxidation (M); Deamidation (NQ)	68513	Clathrin interactor 1 OS=Mus musculus OX=10090 GN=Clint1 PE=1 SV=2
452	1234	Q01320|TOP2A_MOUSE	208.89	10	10	1018.4	13	7	16	Carbamidomethylation; Deamidation (NQ)	172789	DNA topoisomerase 2-alpha OS=Mus musculus OX=10090 GN=Top2a PE=1 SV=2
445	313	Q9DBR0|AKAP8_MOUSE	208.76	18	18	16809	9	9	16	Carbamidomethylation; Deamidation (NQ)	76294	A-kinase anchor protein 8 OS=Mus musculus OX=10090 GN=Akap8 PE=1 SV=1
471	548	Q921F2|TADBP_MOUSE	208.61	21	21	10132	8	8	15	Carbamidomethylation; Oxidation (M); Deamidation (NQ)	44548	TAR DNA-binding protein 43 OS=Mus musculus OX=10090 GN=Tardbp PE=1 SV=1
114	488	Q9CR57|RL14_MOUSE	207.78	39	39	247440	8	8	73	Carbamidomethylation; Oxidation (M); Deamidation (NQ)	23564	60S ribosomal protein L14 OS=Mus musculus OX=10090 GN=Rpl14 PE=1 SV=3
386	68	P26039|TLN1_MOUSE	207.65	7	7	4423.3	12	12	19	Carbamidomethylation; Deamidation (NQ)	269819	Talin-1 OS=Mus musculus OX=10090 GN=Tln1 PE=1 SV=2
387	187	Q925I1|ATAD3_MOUSE	207.16	20	20	11087	10	10	19	Carbamidomethylation; Oxidation (M)	66742	ATPase family AAA domain-containing protein 3 OS=Mus musculus OX=10090 GN=Atad3 PE=1 SV=1
345	533	O54941|SMCE1_MOUSE	206.97	20	20	14957	9	9	22	Oxidation (M)	46638	SWI/SNF-related matrix-associated actin-dependent regulator of chromatin subfamily E member 1 OS=Mus musculus OX=10090 GN=Smarce1 PE=1 SV=1
371	193	P08113|ENPL_MOUSE	206.95	14	14	12363	9	8	20	Deamidation (NQ)	92476	Endoplasmin OS=Mus musculus OX=10090 GN=Hsp90b1 PE=1 SV=2
593	759	Q9JIX8|ACINU_MOUSE	206.69	7	7	14519	9	9	11		150719	Apoptotic chromatin condensation inducer in the nucleus OS=Mus musculus OX=10090 GN=Acin1 PE=1 SV=3
194	239	Q9CXW4|RL11_MOUSE	206.49	35	35	520570	7	7	43	Carbamidomethylation; Oxidation (M); Acetylation (Protein N-term); Deamidation (NQ)	20252	60S ribosomal protein L11 OS=Mus musculus OX=10090 GN=Rpl11 PE=1 SV=4
543	16723	Q6ZQ03|FNBP4_MOUSE	206.48	11	11	4692.6	10	10	13	Carbamidomethylation; Deamidation (NQ)	111245	Formin-binding protein 4 OS=Mus musculus OX=10090 GN=Fnbp4 PE=1 SV=2
440	965	P61982|1433G_MOUSE	206.39	38	38	7536.4	8	7	17	Oxidation (M); Acetylation (Protein N-term)	28303	14-3-3 protein gamma OS=Mus musculus OX=10090 GN=Ywhag PE=1 SV=2
633	328	Q9CXS4|CENPV_MOUSE	206.34	42	42	6577.9	7	7	10	Carbamidomethylation; Deamidation (NQ)	27541	Centromere protein V OS=Mus musculus OX=10090 GN=Cenpv PE=1 SV=2
329	150	Q8VC70|RBMS2_MOUSE	206.15	23	23	27387	6	6	23	Carbamidomethylation; Oxidation (M); Deamidation (NQ)	40724	RNA-binding motif single-stranded-interacting protein 2 OS=Mus musculus OX=10090 GN=Rbms2 PE=1 SV=1
477	242	Q91WJ8|FUBP1_MOUSE	205.79	16	16	3262.7	9	7	15	Carbamidomethylation	68540	Far upstream element-binding protein 1 OS=Mus musculus OX=10090 GN=Fubp1 PE=1 SV=1
264	833	Q9CQF0|RM11_MOUSE	205.52	46	46	21137	8	8	31	Carbamidomethylation; Oxidation (M)	20680	39S ribosomal protein L11 mitochondrial OS=Mus musculus OX=10090 GN=Mrpl11 PE=1 SV=1
297	3757	P51881|ADT2_MOUSE	205.43	30	30	50125	9	7	26	Carbamidomethylation; Oxidation (M); Acetylation (Protein N-term)	32931	ADP/ATP translocase 2 OS=Mus musculus OX=10090 GN=Slc25a5 PE=1 SV=3
212	378	P70372|ELAV1_MOUSE	205.17	45	45	60695	10	10	38	Carbamidomethylation; Oxidation (M); Acetylation (Protein N-term); Deamidation (NQ)	36169	ELAV-like protein 1 OS=Mus musculus OX=10090 GN=Elavl1 PE=1 SV=2
469	228	Q6P542|ABCF1_MOUSE	205.16	16	16	28483	9	9	15	Carbamidomethylation; Deamidation (NQ)	94945	ATP-binding cassette sub-family F member 1 OS=Mus musculus OX=10090 GN=Abcf1 PE=1 SV=1
219	840	Q9JII5|DAZP1_MOUSE	204.61	21	21	100210	7	7	37	Carbamidomethylation; Oxidation (M); Acetylation (Protein N-term); Deamidation (NQ)	43214	DAZ-associated protein 1 OS=Mus musculus OX=10090 GN=Dazap1 PE=1 SV=2
500	302	P26041|MOES_MOUSE	204.55	19	19	8143.7	11	10	14	Oxidation (M)	67767	Moesin OS=Mus musculus OX=10090 GN=Msn PE=1 SV=3
209	453	P14131|RS16_MOUSE	204.44	46	46	101040	8	8	40	Oxidation (M); Acetylation (Protein N-term); Deamidation (NQ)	16445	40S ribosomal protein S16 OS=Mus musculus OX=10090 GN=Rps16 PE=1 SV=4
532	829	Q61164|CTCF_MOUSE	204.39	10	10	3617.6	7	7	13	Carbamidomethylation; Deamidation (NQ)	83746	Transcriptional repressor CTCF OS=Mus musculus OX=10090 GN=Ctcf PE=1 SV=2
289	512	Q9DBR1|XRN2_MOUSE	204.3	13	13	4578.7	10	10	27	Carbamidomethylation; Deamidation (NQ)	108687	5'-3' exoribonuclease 2 OS=Mus musculus OX=10090 GN=Xrn2 PE=1 SV=1
398	342	Q03145|EPHA2_MOUSE	204.29	10	10	6910.5	8	8	18	Carbamidomethylation	108852	Ephrin type-A receptor 2 OS=Mus musculus OX=10090 GN=Epha2 PE=1 SV=3
479	220	Q8C7Q4|RBM4_MOUSE	204.21	26	26	2731.7	9	1	15	Carbamidomethylation	40045	RNA-binding protein 4 OS=Mus musculus OX=10090 GN=Rbm4 PE=1 SV=1
567	545	Q8CB77|ELOA1_MOUSE	204.04	14	14	13566	9	9	12	Carbamidomethylation; Acetylation (Protein N-term)	87161	Elongin-A OS=Mus musculus OX=10090 GN=Eloa PE=1 SV=3
419	283	Q6ZWX6|IF2A_MOUSE	203.79	23	23	7642.8	7	7	18	Carbamidomethylation; Oxidation (M)	36108	Eukaryotic translation initiation factor 2 subunit 1 OS=Mus musculus OX=10090 GN=Eif2s1 PE=1 SV=3
372	576	Q8BKS9|PUM3_MOUSE	203.63	17	17	9734.3	10	10	20	Carbamidomethylation; Oxidation (M)	72800	Pumilio homolog 3 OS=Mus musculus OX=10090 GN=Pum3 PE=1 SV=2
394	397	A2BE28|LAS1L_MOUSE	203.62	13	13	8382	8	8	19	Carbamidomethylation; Deamidation (NQ)	89414	Ribosomal biogenesis protein LAS1L OS=Mus musculus OX=10090 GN=Las1l PE=1 SV=1
561	848	Q3U9G9|LBR_MOUSE	203.62	13	13	17960	8	8	12		71440	Delta(14)-sterol reductase LBR OS=Mus musculus OX=10090 GN=Lbr PE=1 SV=2
129	1490	P62918|RL8_MOUSE	203.43	32	32	440160	7	7	66	Carbamidomethylation; Deamidation (NQ)	28025	60S ribosomal protein L8 OS=Mus musculus OX=10090 GN=Rpl8 PE=1 SV=2
525	340	Q7TSY8|SGO2_MOUSE	203.41	9	9	3285.6	8	8	13	Carbamidomethylation	130277	Shugoshin 2 OS=Mus musculus OX=10090 GN=Sgo2 PE=1 SV=1
432	463	O70194|EIF3D_MOUSE	203.27	16	16	9522.6	8	8	17	Oxidation (M); Deamidation (NQ)	63989	Eukaryotic translation initiation factor 3 subunit D OS=Mus musculus OX=10090 GN=Eif3d PE=1 SV=2
447	936	Q8JZQ9|EIF3B_MOUSE	202.8	11	11	6450	8	8	16	Carbamidomethylation; Oxidation (M); Acetylation (Protein N-term)	91370	Eukaryotic translation initiation factor 3 subunit B OS=Mus musculus OX=10090 GN=Eif3b PE=1 SV=1
310	172	Q9WVM1|RGAP1_MOUSE	202.79	22	22	9507.3	9	9	25	Carbamidomethylation; Oxidation (M)	70159	Rac GTPase-activating protein 1 OS=Mus musculus OX=10090 GN=Racgap1 PE=1 SV=1
184	399	P67984|RL22_MOUSE	202.78	42	42	307790	6	6	46	Deamidation (NQ)	14759	60S ribosomal protein L22 OS=Mus musculus OX=10090 GN=Rpl22 PE=1 SV=2
454	333	P60122|RUVB1_MOUSE	202.5	29	29	8638.6	10	10	16	Carbamidomethylation; Oxidation (M)	50214	RuvB-like 1 OS=Mus musculus OX=10090 GN=Ruvbl1 PE=1 SV=1
322	417	Q60668|HNRPD_MOUSE	202.38	28	28	23281	7	6	24	Carbamidomethylation; Oxidation (M)	38354	Heterogeneous nuclear ribonucleoprotein D0 OS=Mus musculus OX=10090 GN=Hnrnpd PE=1 SV=2
273	462	Q8BWW4|LARP4_MOUSE	202.36	19	19	17186	9	9	30	Oxidation (M); Deamidation (NQ)	79763	La-related protein 4 OS=Mus musculus OX=10090 GN=Larp4 PE=1 SV=2
220	410	P10922|H10_MOUSE	202.22	25	25	103280	6	6	37	Oxidation (M); Acetylation (Protein N-term); Deamidation (NQ)	20861	Histone H1.0 OS=Mus musculus OX=10090 GN=H1-0 PE=2 SV=4
374	185	Q91VR2|ATPG_MOUSE	202.09	31	31	41812	8	8	20	Carbamidomethylation; Oxidation (M)	32886	ATP synthase subunit gamma mitochondrial OS=Mus musculus OX=10090 GN=Atp5f1c PE=1 SV=1
312	339	P47753|CAZA1_MOUSE	201.95	36	36	16715	7	6	25	Carbamidomethylation; Acetylation (Protein N-term); Deamidation (NQ)	32940	F-actin-capping protein subunit alpha-1 OS=Mus musculus OX=10090 GN=Capza1 PE=1 SV=4
403	937	O54833|CSK22_MOUSE	201.77	27	27	19711	7	7	18	Carbamidomethylation; Oxidation (M); Deamidation (NQ)	41215	Casein kinase II subunit alpha' OS=Mus musculus OX=10090 GN=Csnk2a2 PE=1 SV=1
457	334	Q9WV92|E41L3_MOUSE	201.6	15	15	2808	9	9	16	Carbamidomethylation	103338	Band 4.1-like protein 3 OS=Mus musculus OX=10090 GN=Epb41l3 PE=1 SV=1
590	146	P97386|DNLI3_MOUSE	201.53	8	8	3139.8	8	8	11		113072	DNA ligase 3 OS=Mus musculus OX=10090 GN=Lig3 PE=1 SV=2
568	329	Q8BJS4|SUN2_MOUSE	201.41	13	13	5382.4	8	8	12	Oxidation (M); Deamidation (NQ)	81605	SUN domain-containing protein 2 OS=Mus musculus OX=10090 GN=Sun2 PE=1 SV=3
317	181	Q80U58|PUM2_MOUSE	201.35	9	9	7450.9	9	7	24	Oxidation (M); Acetylation (Protein N-term)	114314	Pumilio homolog 2 OS=Mus musculus OX=10090 GN=Pum2 PE=1 SV=2
421	560	P19096|FAS_MOUSE	200.68	5	5	2332.7	10	10	17	Acetylation (Protein N-term); Deamidation (NQ)	272426	Fatty acid synthase OS=Mus musculus OX=10090 GN=Fasn PE=1 SV=2
269	306	P62259|1433E_MOUSE	200.64	40	40	12536	9	8	30	Carbamidomethylation; Oxidation (M); Acetylation (Protein N-term)	29174	14-3-3 protein epsilon OS=Mus musculus OX=10090 GN=Ywhae PE=1 SV=1
133	445	Q60749|KHDR1_MOUSE	200.38	26	26	252350	9	9	65	Oxidation (M); Deamidation (NQ)	48371	KH domain-containing RNA-binding signal transduction-associated protein 1 OS=Mus musculus OX=10090 GN=Khdrbs1 PE=1 SV=2
428	492	P11983|TCPA_MOUSE	200.36	23	23	14432	11	11	17	Carbamidomethylation; Oxidation (M); Acetylation (Protein N-term)	60449	T-complex protein 1 subunit alpha OS=Mus musculus OX=10090 GN=Tcp1 PE=1 SV=3
426	161	F8VPU2|FARP1_MOUSE	200.16	13	13	16246	9	9	17	Carbamidomethylation; Acetylation (Protein N-term); Deamidation (NQ)	118875	FERM ARHGEF and pleckstrin domain-containing protein 1 OS=Mus musculus OX=10090 GN=Farp1 PE=1 SV=1
111	564	P62830|RL23_MOUSE	200.12	49	49	271550	6	6	76	Carbamidomethylation; Oxidation (M); Deamidation (NQ)	14865	60S ribosomal protein L23 OS=Mus musculus OX=10090 GN=Rpl23 PE=1 SV=1
160	1439	P14115|RL27A_MOUSE	199.9	44	44	343190	8	8	54	Carbamidomethylation; Deamidation (NQ)	16605	60S ribosomal protein L27a OS=Mus musculus OX=10090 GN=Rpl27a PE=1 SV=5
460	249	P27773|PDIA3_MOUSE	199.75	21	21	10108	9	9	16	Oxidation (M)	56678	Protein disulfide-isomerase A3 OS=Mus musculus OX=10090 GN=Pdia3 PE=1 SV=2
444	517	Q99JX7|NXF1_MOUSE	199.69	17	17	3475.5	8	8	16	Carbamidomethylation; Oxidation (M)	70300	Nuclear RNA export factor 1 OS=Mus musculus OX=10090 GN=Nxf1 PE=1 SV=3
213	485	Q8BP71|RFOX2_MOUSE	199.4	27	27	20077	8	8	38	Oxidation (M); Acetylation (Protein N-term); Deamidation (NQ)	47330	RNA binding protein fox-1 homolog 2 OS=Mus musculus OX=10090 GN=Rbfox2 PE=1 SV=2
259	405	Q8C570|RAE1L_MOUSE	199.25	36	36	29525	8	8	32	Carbamidomethylation; Oxidation (M); Deamidation (NQ)	40965	mRNA export factor OS=Mus musculus OX=10090 GN=Rae1 PE=1 SV=1
388	5419	Q8BKT7|THOC5_MOUSE	198.85	13	13	19099	9	9	19	Carbamidomethylation; Oxidation (M)	78686	THO complex subunit 5 homolog OS=Mus musculus OX=10090 GN=Thoc5 PE=1 SV=2
270	425	Q922V4|PLRG1_MOUSE	198.72	21	21	15832	7	7	30	Carbamidomethylation; Oxidation (M); Deamidation (NQ)	56938	Pleiotropic regulator 1 OS=Mus musculus OX=10090 GN=Plrg1 PE=1 SV=1
695	906	P53996|CNBP_MOUSE	198.68	39	39	10041	5	5	9	Carbamidomethylation	19592	Cellular nucleic acid-binding protein OS=Mus musculus OX=10090 GN=Cnbp PE=1 SV=2
641	402	P63038|CH60_MOUSE	198.36	20	20	8827.2	9	9	10	Carbamidomethylation	60956	60 kDa heat shock protein mitochondrial OS=Mus musculus OX=10090 GN=Hspd1 PE=1 SV=1
465	821	P84089|ERH_MOUSE	198.29	49	49	43607	6	6	16	Carbamidomethylation; Oxidation (M); Acetylation (Protein N-term)	12259	Enhancer of rudimentary homolog OS=Mus musculus OX=10090 GN=Erh PE=1 SV=1
537	219	Q8VE92|RBM4B_MOUSE	198.17	27	27	1381.1	9	1	13	Carbamidomethylation	39991	RNA-binding protein 4B OS=Mus musculus OX=10090 GN=Rbm4b PE=1 SV=1
441	390	Q99LE6|ABCF2_MOUSE	198.16	18	18	38343	11	11	16	Carbamidomethylation; Oxidation (M); Deamidation (NQ)	71782	ATP-binding cassette sub-family F member 2 OS=Mus musculus OX=10090 GN=Abcf2 PE=1 SV=1
255	1436	Q9D0T1|NH2L1_MOUSE	198.1	47	47	77588	6	6	32	Carbamidomethylation; Deamidation (NQ)	14174	NHP2-like protein 1 OS=Mus musculus OX=10090 GN=Snu13 PE=1 SV=4
461	1571	P68040|RACK1_MOUSE	197.98	32	32	8796.8	8	8	16	Carbamidomethylation; Oxidation (M); Deamidation (NQ)	35077	Receptor of activated protein C kinase 1 OS=Mus musculus OX=10090 GN=Rack1 PE=1 SV=3
531	337	Q8R2U2|NEPRO_MOUSE	197.79	17	17	8282.4	7	7	13	Carbamidomethylation; Acetylation (Protein N-term)	63394	Nucleolus and neural progenitor protein OS=Mus musculus OX=10090 GN=Nepro PE=2 SV=1
498	142	P07356|ANXA2_MOUSE	197.27	25	25	10984	8	8	15	Carbamidomethylation	38676	Annexin A2 OS=Mus musculus OX=10090 GN=Anxa2 PE=1 SV=2
319	332	Q64213|SF01_MOUSE	197.22	15	15	27755	9	9	24	Carbamidomethylation; Oxidation (M); Acetylation (Protein N-term); Deamidation (NQ)	70403	Splicing factor 1 OS=Mus musculus OX=10090 GN=Sf1 PE=1 SV=6
449	582	Q497V5|SRBD1_MOUSE	196.88	15	15	2964.7	11	11	16	Carbamidomethylation; Oxidation (M); Deamidation (NQ)	110281	S1 RNA-binding domain-containing protein 1 OS=Mus musculus OX=10090 GN=Srbd1 PE=2 SV=3
475	1077	Q3UPF5|ZCCHV_MOUSE	196.86	12	12	21265	9	9	15	Carbamidomethylation; Acetylation (Protein N-term)	106687	Zinc finger CCCH-type antiviral protein 1 OS=Mus musculus OX=10090 GN=Zc3hav1 PE=1 SV=1
151	432	Q8BP67|RL24_MOUSE	196.76	41	41	366010	8	8	58	Carbamidomethylation; Oxidation (M)	17779	60S ribosomal protein L24 OS=Mus musculus OX=10090 GN=Rpl24 PE=1 SV=2
476	377	Q9D903|EBP2_MOUSE	196.62	34	34	23676	10	10	15	Carbamidomethylation; Oxidation (M)	34703	Probable rRNA-processing protein EBP2 OS=Mus musculus OX=10090 GN=Ebna1bp2 PE=2 SV=1
619	573	E9QAM5|HELZ2_MOUSE	196.52	3	3	1383.5	7	7	10	Deamidation (NQ)	331563	Helicase with zinc finger domain 2 OS=Mus musculus OX=10090 GN=Helz2 PE=1 SV=1
576	4075	Q7M6Y3|PICAL_MOUSE	196.47	13	13	2519.3	7	7	12		71543	Phosphatidylinositol-binding clathrin assembly protein OS=Mus musculus OX=10090 GN=Picalm PE=1 SV=1
64	2233	O09167|RL21_MOUSE	196.44	42	42	340260	6	6	131	Oxidation (M); Deamidation (NQ)	18562	60S ribosomal protein L21 OS=Mus musculus OX=10090 GN=Rpl21 PE=1 SV=3
575	217	Q5SSI6|UTP18_MOUSE	196.09	17	17	8478.7	8	8	12	Carbamidomethylation; Oxidation (M)	61218	U3 small nucleolar RNA-associated protein 18 homolog OS=Mus musculus OX=10090 GN=Utp18 PE=1 SV=1
357	450	P48962|ADT1_MOUSE	196.05	34	34	48167	9	7	21	Carbamidomethylation; Oxidation (M); Acetylation (Protein N-term); Deamidation (NQ)	32904	ADP/ATP translocase 1 OS=Mus musculus OX=10090 GN=Slc25a4 PE=1 SV=4
382	151	P60335|PCBP1_MOUSE	195.82	26	26	9155.7	7	5	20	Carbamidomethylation; Oxidation (M); Deamidation (NQ)	37498	Poly(rC)-binding protein 1 OS=Mus musculus OX=10090 GN=Pcbp1 PE=1 SV=1
490	295	Q9CYL5|GAPR1_MOUSE	195.58	51	51	19499	6	6	15	Carbamidomethylation	17090	Golgi-associated plant pathogenesis-related protein 1 OS=Mus musculus OX=10090 GN=Glipr2 PE=1 SV=3
484	375	Q80T69|RSBN1_MOUSE	195.56	14	14	6219.6	8	8	15	Carbamidomethylation; Oxidation (M)	89251	Lysine-specific demethylase 9 OS=Mus musculus OX=10090 GN=Rsbn1 PE=1 SV=3
401	162	P59326|YTHD1_MOUSE	195.28	17	17	9548.2	9	5	18	Carbamidomethylation; Oxidation (M)	60879	YTH domain-containing family protein 1 OS=Mus musculus OX=10090 GN=Ythdf1 PE=1 SV=1
413	233	Q61033|LAP2A_MOUSE	195.24	15	15	0	7	1	18		75168	Lamina-associated polypeptide 2 isoforms alpha/zeta OS=Mus musculus OX=10090 GN=Tmpo PE=1 SV=4
375	344	P14206|RSSA_MOUSE	195.16	37	37	20787	8	8	20	Carbamidomethylation; Acetylation (Protein N-term)	32838	40S ribosomal protein SA OS=Mus musculus OX=10090 GN=Rpsa PE=1 SV=4
506	258	Q9WTU0|PHF2_MOUSE	195.08	10	10	9299.3	8	8	14	Carbamidomethylation; Oxidation (M); Acetylation (Protein N-term); Deamidation (NQ)	120814	Lysine-specific demethylase PHF2 OS=Mus musculus OX=10090 GN=Phf2 PE=1 SV=2
410	7454	P63158|HMGB1_MOUSE	194.93	40	40	11596	7	5	18	Carbamidomethylation; Oxidation (M)	24894	High mobility group protein B1 OS=Mus musculus OX=10090 GN=Hmgb1 PE=1 SV=2
392	183	Q60865|CAPR1_MOUSE	194.92	12	12	29544	8	8	19	Carbamidomethylation; Oxidation (M); Deamidation (NQ)	78169	Caprin-1 OS=Mus musculus OX=10090 GN=Caprin1 PE=1 SV=2
150	305	Q9CZX8|RS19_MOUSE	194.91	48	48	191430	9	9	58	Acetylation (Protein N-term); Deamidation (NQ)	16085	40S ribosomal protein S19 OS=Mus musculus OX=10090 GN=Rps19 PE=1 SV=3
669	1396	A2A7S8|K1522_MOUSE	194.88	8	8	2177.7	6	6	9	Oxidation (M)	104842	Uncharacterized protein KIAA1522 OS=Mus musculus OX=10090 GN=Kiaa1522 PE=1 SV=1
418	218	Q922P9|GLYR1_MOUSE	194.24	15	15	12040	6	6	18	Carbamidomethylation; Oxidation (M)	59716	Putative oxidoreductase GLYR1 OS=Mus musculus OX=10090 GN=Glyr1 PE=1 SV=1
486	1060	P97315|CSRP1_MOUSE	194.21	41	41	9119.7	6	6	15	Carbamidomethylation	20583	Cysteine and glycine-rich protein 1 OS=Mus musculus OX=10090 GN=Csrp1 PE=1 SV=3
260	395	Q8C6B9|AROS_MOUSE	194.03	41	41	33348	6	6	32	Deamidation (NQ)	15978	Active regulator of SIRT1 OS=Mus musculus OX=10090 GN=Rps19bp1 PE=1 SV=1
291	832	Q9CPT5|NOP16_MOUSE	193.96	37	37	22249	6	6	27	Oxidation (M); Deamidation (NQ)	21139	Nucleolar protein 16 OS=Mus musculus OX=10090 GN=Nop16 PE=1 SV=1
569	191	O55143|AT2A2_MOUSE	193.71	10	10	10228	8	5	12	Carbamidomethylation	114858	Sarcoplasmic/endoplasmic reticulum calcium ATPase 2 OS=Mus musculus OX=10090 GN=Atp2a2 PE=1 SV=2
128	1240	Q6ZWV3|RL10_MOUSE	193.64	37	37	71871	7	7	67	Carbamidomethylation; Oxidation (M); Deamidation (NQ)	24604	60S ribosomal protein L10 OS=Mus musculus OX=10090 GN=Rpl10 PE=1 SV=3
65	1487	P62889|RL30_MOUSE	193.37	59	59	520260	6	6	129	Carbamidomethylation; Oxidation (M); Deamidation (NQ)	12784	60S ribosomal protein L30 OS=Mus musculus OX=10090 GN=Rpl30 PE=1 SV=2
627	122	Q99KG3|RBM10_MOUSE	193.08	9	9	8789.7	7	7	10	Carbamidomethylation	103494	RNA-binding protein 10 OS=Mus musculus OX=10090 GN=Rbm10 PE=1 SV=1
589	321	P11103|PARP1_MOUSE	192.98	12	12	3477.7	9	9	11	Carbamidomethylation; Oxidation (M)	113100	Poly [ADP-ribose] polymerase 1 OS=Mus musculus OX=10090 GN=Parp1 PE=1 SV=3
402	461	P70257|NFIX_MOUSE	192.85	29	29	8230.9	9	8	18	Carbamidomethylation; Oxidation (M)	53394	Nuclear factor 1 X-type OS=Mus musculus OX=10090 GN=Nfix PE=1 SV=2
267	300	Q8R0K4|CC137_MOUSE	192.43	29	29	28558	6	6	30	Oxidation (M); Acetylation (Protein N-term)	32918	Coiled-coil domain-containing protein 137 OS=Mus musculus OX=10090 GN=Ccdc137 PE=2 SV=1
493	852	P13020|GELS_MOUSE	192.03	14	14	6188.3	8	8	15	Carbamidomethylation	85942	Gelsolin OS=Mus musculus OX=10090 GN=Gsn PE=1 SV=3
436	3216	Q9D1C9|RRP7A_MOUSE	191.72	32	32	9518.7	7	7	17	Carbamidomethylation	32399	Ribosomal RNA-processing protein 7 homolog A OS=Mus musculus OX=10090 GN=Rrp7a PE=2 SV=1
361	494	P62317|SMD2_MOUSE	191.6	56	56	13399	7	7	21	Carbamidomethylation; Oxidation (M)	13527	Small nuclear ribonucleoprotein Sm D2 OS=Mus musculus OX=10090 GN=Snrpd2 PE=1 SV=1
443	170	Q9QWL7|K1C17_MOUSE	191.54	22	22	145.82	10	2	16	Oxidation (M); Deamidation (NQ)	48162	Keratin type I cytoskeletal 17 OS=Mus musculus OX=10090 GN=Krt17 PE=1 SV=3
272	884	P14602|HSPB1_MOUSE	191.44	53	53	12749	7	7	30		23014	Heat shock protein beta-1 OS=Mus musculus OX=10090 GN=Hspb1 PE=1 SV=3
600	27805	Q5U4D9|THOC6_MOUSE	191.04	35	35	5830	8	8	11	Carbamidomethylation; Acetylation (Protein N-term); Deamidation (NQ)	37315	THO complex subunit 6 homolog OS=Mus musculus OX=10090 GN=Thoc6 PE=1 SV=1
545	467	Q8K4L0|DDX54_MOUSE	190.98	10	10	2951.7	6	6	13	Carbamidomethylation	97748	ATP-dependent RNA helicase DDX54 OS=Mus musculus OX=10090 GN=Ddx54 PE=1 SV=1
556	1523	Q9Z1N2|ORC1_MOUSE	190.6	9	9	3981.4	6	6	12		95103	Origin recognition complex subunit 1 OS=Mus musculus OX=10090 GN=Orc1 PE=1 SV=2
433	27806	Q9JJ89|CCD86_MOUSE	190.58	21	21	11172	8	8	17	Oxidation (M); Deamidation (NQ)	46487	Coiled-coil domain-containing protein 86 OS=Mus musculus OX=10090 GN=Ccdc86 PE=1 SV=2
614	354	Q91VI7|RINI_MOUSE	190.47	25	25	6138.9	8	8	11	Carbamidomethylation; Acetylation (Protein N-term); Deamidation (NQ)	49817	Ribonuclease inhibitor OS=Mus musculus OX=10090 GN=Rnh1 PE=1 SV=1
313	1712	O70503|DHB12_MOUSE	190.43	23	23	27587	8	8	25	Carbamidomethylation; Deamidation (NQ)	34742	Very-long-chain 3-oxoacyl-CoA reductase OS=Mus musculus OX=10090 GN=Hsd17b12 PE=1 SV=1
367	418	Q91W59|RBMS1_MOUSE	190.35	16	16	43806	5	5	20	Carbamidomethylation; Deamidation (NQ)	43991	RNA-binding motif single-stranded-interacting protein 1 OS=Mus musculus OX=10090 GN=Rbms1 PE=1 SV=1
422	216	G3X9J0|SI1L3_MOUSE	190.1	8	8	1492.6	9	9	17	Carbamidomethylation; Deamidation (NQ)	195062	Signal-induced proliferation-associated 1-like protein 3 OS=Mus musculus OX=10090 GN=Sipa1l3 PE=1 SV=1
429	851	Q8K202|RPA49_MOUSE	189.54	22	22	11222	9	9	17	Carbamidomethylation; Deamidation (NQ)	54034	DNA-directed RNA polymerase I subunit RPA49 OS=Mus musculus OX=10090 GN=Polr1e PE=1 SV=2
588	167	Q91WK0|LRRF2_MOUSE	189.36	17	17	21946	6	5	11	Oxidation (M)	47148	Leucine-rich repeat flightless-interacting protein 2 OS=Mus musculus OX=10090 GN=Lrrfip2 PE=1 SV=1
464	1385	P97461|RS5_MOUSE	189.31	29	29	24203	7	7	16	Carbamidomethylation; Acetylation (Protein N-term)	22889	40S ribosomal protein S5 OS=Mus musculus OX=10090 GN=Rps5 PE=1 SV=3
344	530	P18760|COF1_MOUSE	189.27	42	42	22764	8	7	22	Carbamidomethylation; Acetylation (Protein N-term)	18560	Cofilin-1 OS=Mus musculus OX=10090 GN=Cfl1 PE=1 SV=3
514	266	Q5SUF2|LC7L3_MOUSE	189.2	18	18	7297.1	6	6	14	Deamidation (NQ)	51450	Luc7-like protein 3 OS=Mus musculus OX=10090 GN=Luc7l3 PE=1 SV=1
95	889	P61514|RL37A_MOUSE	189.11	62	62	321420	5	5	84	Carbamidomethylation; Oxidation (M); Deamidation (NQ)	10275	60S ribosomal protein L37a OS=Mus musculus OX=10090 GN=Rpl37a PE=1 SV=2
359	208	O88291|ZN326_MOUSE	188.61	11	11	15613	5	5	21	Carbamidomethylation; Oxidation (M); Acetylation (Protein N-term); Deamidation (NQ)	65225	DBIRD complex subunit ZNF326 OS=Mus musculus OX=10090 GN=Znf326 PE=1 SV=1
557	282	P17751|TPIS_MOUSE	188.23	35	35	3737.8	7	7	12	Carbamidomethylation; Deamidation (NQ)	32192	Triosephosphate isomerase OS=Mus musculus OX=10090 GN=Tpi1 PE=1 SV=4
725	862	P31266|SUH_MOUSE	188.18	16	16	5303.5	7	7	8	Carbamidomethylation; Oxidation (M)	58537	Recombining binding protein suppressor of hairless OS=Mus musculus OX=10090 GN=Rbpj PE=1 SV=1
191	202	Q8CI43|MYL6B_MOUSE	188.09	31	31	4163.2	6	4	44	Carbamidomethylation; Oxidation (M); Deamidation (NQ)	22749	Myosin light chain 6B OS=Mus musculus OX=10090 GN=Myl6b PE=1 SV=1
480	1479	Q91WN1|DNJC9_MOUSE	188.08	39	39	20091	8	8	15	Deamidation (NQ)	30059	DnaJ homolog subfamily C member 9 OS=Mus musculus OX=10090 GN=Dnajc9 PE=1 SV=2
379	7469	P62137|PP1A_MOUSE	188.03	21	21	8274.1	7	4	20	Carbamidomethylation; Acetylation (Protein N-term)	37540	Serine/threonine-protein phosphatase PP1-alpha catalytic subunit OS=Mus musculus OX=10090 GN=Ppp1ca PE=1 SV=1
349	1456	Q9D287|SPF27_MOUSE	188.03	26	26	21215	7	7	22	Oxidation (M)	26131	Pre-mRNA-splicing factor SPF27 OS=Mus musculus OX=10090 GN=Bcas2 PE=1 SV=1
533	251	Q61545|EWS_MOUSE	188	13	13	26165	5	5	13	Carbamidomethylation; Oxidation (M)	68462	RNA-binding protein EWS OS=Mus musculus OX=10090 GN=Ewsr1 PE=1 SV=2
328	387	E9Q5C9|NOLC1_MOUSE	187.83	13	13	5895.2	8	8	23		73698	Nucleolar and coiled-body phosphoprotein 1 OS=Mus musculus OX=10090 GN=Nolc1 PE=1 SV=1
205	299	Q9CX86|ROA0_MOUSE	187.81	30	30	44689	6	6	41	Carbamidomethylation; Acetylation (Protein N-term); Deamidation (NQ)	30530	Heterogeneous nuclear ribonucleoprotein A0 OS=Mus musculus OX=10090 GN=Hnrnpa0 PE=1 SV=1
161	859	P62806|H4_MOUSE	187.78	51	51	171480	6	6	54	Oxidation (M)	11367	Histone H4 OS=Mus musculus OX=10090 GN=H4c1 PE=1 SV=2
136	873	P10853|H2B1F_MOUSE	187.26	48	48	200610	7	7	64	Oxidation (M); Deamidation (NQ)	13936	Histone H2B type 1-F/J/L OS=Mus musculus OX=10090 GN=H2bc7 PE=1 SV=2
136	874	Q8CGP1|H2B1K_MOUSE	187.26	48	48	200610	7	7	64	Oxidation (M); Deamidation (NQ)	13920	Histone H2B type 1-K OS=Mus musculus OX=10090 GN=H2bc12 PE=1 SV=3
136	869	Q64475|H2B1B_MOUSE	187.26	48	48	200610	7	7	64	Oxidation (M); Deamidation (NQ)	13952	Histone H2B type 1-B OS=Mus musculus OX=10090 GN=Hist1h2bb PE=1 SV=3
136	870	Q8CGP2|H2B1P_MOUSE	187.26	48	48	200610	7	7	64	Oxidation (M); Deamidation (NQ)	13992	Histone H2B type 1-P OS=Mus musculus OX=10090 GN=Hist1h2bp PE=1 SV=3
136	867	P10854|H2B1M_MOUSE	187.26	48	48	200610	7	7	64	Oxidation (M); Deamidation (NQ)	13936	Histone H2B type 1-M OS=Mus musculus OX=10090 GN=H2bc14 PE=1 SV=2
136	868	Q6ZWY9|H2B1C_MOUSE	187.26	48	48	200610	7	7	64	Oxidation (M); Deamidation (NQ)	13906	Histone H2B type 1-C/E/G OS=Mus musculus OX=10090 GN=H2bc4 PE=1 SV=3
136	872	Q64525|H2B2B_MOUSE	187.26	48	48	200610	7	7	64	Oxidation (M); Deamidation (NQ)	13920	Histone H2B type 2-B OS=Mus musculus OX=10090 GN=Hist2h2bb PE=1 SV=3
136	871	Q64478|H2B1H_MOUSE	187.26	48	48	200610	7	7	64	Oxidation (M); Deamidation (NQ)	13920	Histone H2B type 1-H OS=Mus musculus OX=10090 GN=Hist1h2bh PE=1 SV=3
494	480	Q78PY7|SND1_MOUSE	187.22	9	9	1458.7	6	6	15	Acetylation (Protein N-term)	102088	Staphylococcal nuclease domain-containing protein 1 OS=Mus musculus OX=10090 GN=Snd1 PE=1 SV=1
625	353	P97820|M4K4_MOUSE	187.16	7	7	3239.2	6	5	10	Deamidation (NQ)	140602	Mitogen-activated protein kinase kinase kinase kinase 4 OS=Mus musculus OX=10090 GN=Map4k4 PE=1 SV=1
729	433	O70433|FHL2_MOUSE	186.98	22	22	3393.2	6	6	8	Carbamidomethylation	32073	Four and a half LIM domains protein 2 OS=Mus musculus OX=10090 GN=Fhl2 PE=1 SV=1
598	1448	P47738|ALDH2_MOUSE	186.91	17	17	4030.9	7	7	11		56538	Aldehyde dehydrogenase mitochondrial OS=Mus musculus OX=10090 GN=Aldh2 PE=1 SV=1
458	498	P57776|EF1D_MOUSE	186.63	30	30	13176	6	6	16	Oxidation (M); Acetylation (Protein N-term); Deamidation (NQ)	31293	Elongation factor 1-delta OS=Mus musculus OX=10090 GN=Eef1d PE=1 SV=3
462	240	P50446|K2C6A_MOUSE	186.53	12	12	3272.1	8	2	16	Carbamidomethylation	59335	Keratin type II cytoskeletal 6A OS=Mus musculus OX=10090 GN=Krt6a PE=1 SV=3
505	1107	Q91W50|CSDE1_MOUSE	186.52	15	15	10843	9	9	14	Carbamidomethylation; Deamidation (NQ)	88791	Cold shock domain-containing protein E1 OS=Mus musculus OX=10090 GN=Csde1 PE=1 SV=1
482	1471	Q31125|S39A7_MOUSE	186.52	7	7	72371	4	4	15	Deamidation (NQ)	50657	Zinc transporter SLC39A7 OS=Mus musculus OX=10090 GN=Slc39a7 PE=1 SV=2
408	281	P08775|RPB1_MOUSE	186.2	6	6	3597.7	7	7	18		217174	DNA-directed RNA polymerase II subunit RPB1 OS=Mus musculus OX=10090 GN=Polr2a PE=1 SV=3
817	311	Q9DB77|QCR2_MOUSE	185.77	16	16	6228	5	5	7	Carbamidomethylation	48235	Cytochrome b-c1 complex subunit 2 mitochondrial OS=Mus musculus OX=10090 GN=Uqcrc2 PE=1 SV=1
404	254	Q9EQP2|EHD4_MOUSE	185.56	15	15	2498.9	6	6	18	Oxidation (M); Deamidation (NQ)	61481	EH domain-containing protein 4 OS=Mus musculus OX=10090 GN=Ehd4 PE=1 SV=1
138	933	P53026|RL10A_MOUSE	185.17	24	24	203330	6	6	62	Oxidation (M); Deamidation (NQ)	24916	60S ribosomal protein L10a OS=Mus musculus OX=10090 GN=Rpl10a PE=1 SV=3
414	285	Q61990|PCBP2_MOUSE	185.14	23	23	8187.2	6	4	18	Carbamidomethylation; Oxidation (M); Deamidation (NQ)	38222	Poly(rC)-binding protein 2 OS=Mus musculus OX=10090 GN=Pcbp2 PE=1 SV=1
530	366	Q6PDQ2|CHD4_MOUSE	185.11	6	6	9084.5	10	10	13		217749	Chromodomain-helicase-DNA-binding protein 4 OS=Mus musculus OX=10090 GN=Chd4 PE=1 SV=1
503	489	Q9ER69|FL2D_MOUSE	185.05	27	27	3225.1	7	7	14	Carbamidomethylation; Oxidation (M); Deamidation (NQ)	44177	Pre-mRNA-splicing regulator WTAP OS=Mus musculus OX=10090 GN=Wtap PE=1 SV=3
519	16753	O54825|BYST_MOUSE	184.91	21	21	3403.7	7	7	14	Oxidation (M); Deamidation (NQ)	49784	Bystin OS=Mus musculus OX=10090 GN=Bysl PE=1 SV=3
504	813	Q99JF8|PSIP1_MOUSE	184.34	22	22	7286.3	8	8	14	Carbamidomethylation; Oxidation (M); Deamidation (NQ)	59697	PC4 and SFRS1-interacting protein OS=Mus musculus OX=10090 GN=Psip1 PE=1 SV=1
548	352	P70255|NFIC_MOUSE	184.05	14	14	7641.5	7	6	13	Carbamidomethylation	48768	Nuclear factor 1 C-type OS=Mus musculus OX=10090 GN=Nfic PE=1 SV=1
239	1410	Q6ZWN5|RS9_MOUSE	183.77	38	38	107620	10	10	34	Oxidation (M); Deamidation (NQ)	22591	40S ribosomal protein S9 OS=Mus musculus OX=10090 GN=Rps9 PE=1 SV=3
303	1037	P62900|RL31_MOUSE	183.71	42	42	137710	5	5	26	Oxidation (M); Deamidation (NQ)	14463	60S ribosomal protein L31 OS=Mus musculus OX=10090 GN=Rpl31 PE=1 SV=1
521	207	P62827|RAN_MOUSE	183.56	30	30	32494	7	7	14	Carbamidomethylation; Acetylation (Protein N-term); Deamidation (NQ)	24423	GTP-binding nuclear protein Ran OS=Mus musculus OX=10090 GN=Ran PE=1 SV=3
173	1551	P62301|RS13_MOUSE	183.34	34	34	139160	6	6	49	Acetylation (Protein N-term); Deamidation (NQ)	17222	40S ribosomal protein S13 OS=Mus musculus OX=10090 GN=Rps13 PE=1 SV=2
430	237	Q8CCP0|NEMF_MOUSE	183.05	9	9	4467.6	9	9	17	Carbamidomethylation	121188	Nuclear export mediator factor Nemf OS=Mus musculus OX=10090 GN=Nemf PE=1 SV=2
564	522	Q62187|TTF1_MOUSE	183.03	13	13	1269.8	7	7	12	Carbamidomethylation	97723	Transcription termination factor 1 OS=Mus musculus OX=10090 GN=Ttf1 PE=1 SV=2
380	836	P68254|1433T_MOUSE	182.8	23	23	4194.6	6	4	20	Carbamidomethylation; Oxidation (M)	27778	14-3-3 protein theta OS=Mus musculus OX=10090 GN=Ywhaq PE=1 SV=1
473	409	Q6ZQL4|WDR43_MOUSE	182.69	11	11	6333.5	7	7	15	Carbamidomethylation	75381	WD repeat-containing protein 43 OS=Mus musculus OX=10090 GN=Wdr43 PE=1 SV=2
470	477	Q6PAC3|DCA13_MOUSE	182.58	22	22	6564.7	8	8	15	Carbamidomethylation; Oxidation (M)	51456	DDB1- and CUL4-associated factor 13 OS=Mus musculus OX=10090 GN=Dcaf13 PE=2 SV=2
706	786	Q9JMH9|MY18A_MOUSE	182.55	4	4	1895.2	7	7	8	Carbamidomethylation	232753	Unconventional myosin-XVIIIa OS=Mus musculus OX=10090 GN=Myo18a PE=1 SV=2
536	673	E9Q4N7|ARI1B_MOUSE	182.3	4	4	1383.9	8	6	13	Oxidation (M)	237793	AT-rich interactive domain-containing protein 1B OS=Mus musculus OX=10090 GN=Arid1b PE=1 SV=1
515	7427	Q9EQU5|SET_MOUSE	182.19	28	28	18891	7	7	14		33378	Protein SET OS=Mus musculus OX=10090 GN=Set PE=1 SV=1
660	227	Q6ZPF4|FMNL3_MOUSE	182.02	8	8	2541.5	7	4	9	Carbamidomethylation	117169	Formin-like protein 3 OS=Mus musculus OX=10090 GN=Fmnl3 PE=1 SV=2
610	2375	Q8K4B0|MTA1_MOUSE	181.74	11	11	6979	6	5	11	Carbamidomethylation; Deamidation (NQ)	80798	Metastasis-associated protein MTA1 OS=Mus musculus OX=10090 GN=Mta1 PE=1 SV=1
152	849	P62852|RS25_MOUSE	181.4	47	47	298500	7	7	58	Carbamidomethylation; Deamidation (NQ)	13742	40S ribosomal protein S25 OS=Mus musculus OX=10090 GN=Rps25 PE=1 SV=1
406	288	Q7TNC4|LC7L2_MOUSE	181.34	16	16	8996.8	5	3	18	Oxidation (M)	46583	Putative RNA-binding protein Luc7-like 2 OS=Mus musculus OX=10090 GN=Luc7l2 PE=1 SV=1
621	259	Q3UHX0|NOL8_MOUSE	181.11	7	7	2543	6	6	10	Carbamidomethylation; Oxidation (M)	128635	Nucleolar protein 8 OS=Mus musculus OX=10090 GN=Nol8 PE=1 SV=2
496	1667	O70326|GREM1_MOUSE	181.07	36	36	18615	5	5	15	Carbamidomethylation; Deamidation (NQ)	20710	Gremlin-1 OS=Mus musculus OX=10090 GN=Grem1 PE=2 SV=1
288	945	P17742|PPIA_MOUSE	180.98	63	63	15561	8	8	28	Carbamidomethylation; Oxidation (M); Deamidation (NQ)	17971	Peptidyl-prolyl cis-trans isomerase A OS=Mus musculus OX=10090 GN=Ppia PE=1 SV=2
570	632	P46061|RAGP1_MOUSE	180.96	14	14	14729	8	8	12	Carbamidomethylation	63531	Ran GTPase-activating protein 1 OS=Mus musculus OX=10090 GN=Rangap1 PE=1 SV=2
448	9826	Q6NZQ2|DDX31_MOUSE	180.7	14	14	4856.6	7	7	16	Carbamidomethylation; Deamidation (NQ)	76913	Probable ATP-dependent RNA helicase DDX31 OS=Mus musculus OX=10090 GN=Ddx31 PE=2 SV=2
571	1572	Q99L45|IF2B_MOUSE	180.55	32	32	7128.3	7	7	12	Carbamidomethylation	38092	Eukaryotic translation initiation factor 2 subunit 2 OS=Mus musculus OX=10090 GN=Eif2s2 PE=1 SV=1
642	222	Q91WQ3|SYYC_MOUSE	180.13	16	16	3710.8	8	8	10	Carbamidomethylation	59105	Tyrosine--tRNA ligase cytoplasmic OS=Mus musculus OX=10090 GN=Yars1 PE=1 SV=3
330	544	Q9CY57|CHTOP_MOUSE	180.05	29	29	37766	5	5	23	Oxidation (M)	26585	Chromatin target of PRMT1 protein OS=Mus musculus OX=10090 GN=Chtop PE=1 SV=2
383	357	Q9CQT2|RBM7_MOUSE	180.02	28	28	25718	8	8	20	Oxidation (M); Acetylation (Protein N-term)	30148	RNA-binding protein 7 OS=Mus musculus OX=10090 GN=Rbm7 PE=1 SV=1
347	864	O55142|RL35A_MOUSE	180.02	40	40	144160	7	7	22	Carbamidomethylation; Oxidation (M); Deamidation (NQ)	12554	60S ribosomal protein L35a OS=Mus musculus OX=10090 GN=Rpl35a PE=1 SV=2
632	442	Q9QXK7|CPSF3_MOUSE	179.66	11	11	6406.5	7	7	10	Carbamidomethylation	77505	Cleavage and polyadenylation specificity factor subunit 3 OS=Mus musculus OX=10090 GN=Cpsf3 PE=1 SV=2
78	880	Q9CZM2|RL15_MOUSE	179.59	30	30	220280	5	5	112	Deamidation (NQ)	24146	60S ribosomal protein L15 OS=Mus musculus OX=10090 GN=Rpl15 PE=1 SV=4
655	241	Q8CJG0|AGO2_MOUSE	179.43	9	9	2151	6	6	9	Carbamidomethylation	97304	Protein argonaute-2 OS=Mus musculus OX=10090 GN=Ago2 PE=1 SV=3
552	823	P62962|PROF1_MOUSE	179.43	59	59	5337.5	6	6	13	Carbamidomethylation; Oxidation (M); Deamidation (NQ)	14957	Profilin-1 OS=Mus musculus OX=10090 GN=Pfn1 PE=1 SV=2
565	5142	Q3TIX9|SNUT2_MOUSE	179.36	15	15	7689.6	7	7	12	Carbamidomethylation	65146	U4/U6.U5 tri-snRNP-associated protein 2 OS=Mus musculus OX=10090 GN=Usp39 PE=1 SV=2
124	1587	P61358|RL27_MOUSE	179.25	40	40	415430	6	6	68	Oxidation (M); Deamidation (NQ)	15798	60S ribosomal protein L27 OS=Mus musculus OX=10090 GN=Rpl27 PE=1 SV=2
438	1394	Q8BP92|RCN2_MOUSE	179.23	22	22	11729	4	4	17		37271	Reticulocalbin-2 OS=Mus musculus OX=10090 GN=Rcn2 PE=1 SV=1
513	327	Q9DB85|RRP8_MOUSE	178.85	23	23	13046	7	7	14		51066	Ribosomal RNA-processing protein 8 OS=Mus musculus OX=10090 GN=Rrp8 PE=1 SV=1
489	856	Q60972|RBBP4_MOUSE	178.58	18	18	14519	5	4	15	Carbamidomethylation; Oxidation (M); Acetylation (Protein N-term)	47656	Histone-binding protein RBBP4 OS=Mus musculus OX=10090 GN=Rbbp4 PE=1 SV=5
377	670	P11679|K2C8_MOUSE	178.44	13	13	1796.4	7	3	20		54565	Keratin type II cytoskeletal 8 OS=Mus musculus OX=10090 GN=Krt8 PE=1 SV=4
606	224	Q9WVA3|BUB3_MOUSE	178.17	22	22	13317	6	6	11	Carbamidomethylation	36955	Mitotic checkpoint protein BUB3 OS=Mus musculus OX=10090 GN=Bub3 PE=1 SV=2
179	810	P01837|IGKC_MOUSE	178.04	38	38	114080	4	4	47	Oxidation (M); Deamidation (NQ)	11934	Immunoglobulin kappa constant OS=Mus musculus OX=10090 GN=Igkc PE=1 SV=2
613	27825	Q7TND5|RPF1_MOUSE	177.63	11	11	1008	3	3	11		40037	Ribosome production factor 1 OS=Mus musculus OX=10090 GN=Rpf1 PE=2 SV=2
472	350	Q8QZY1|EIF3L_MOUSE	177.59	14	14	5942.5	6	6	15		66613	Eukaryotic translation initiation factor 3 subunit L OS=Mus musculus OX=10090 GN=Eif3l PE=1 SV=1
711	1054	Q8BK35|NOP53_MOUSE	177.54	15	15	6103.9	6	6	8		55793	Ribosome biogenesis protein NOP53 OS=Mus musculus OX=10090 GN=Nop53 PE=1 SV=1
685	166	B1AY10|NFX1_MOUSE	177.36	7	7	1943.5	6	6	9	Carbamidomethylation; Deamidation (NQ)	123811	Transcriptional repressor NF-X1 OS=Mus musculus OX=10090 GN=Nfx1 PE=1 SV=1
407	1977	Q64012|RALY_MOUSE	177.31	23	23	9076.4	6	6	18		33188	RNA-binding protein Raly OS=Mus musculus OX=10090 GN=Raly PE=1 SV=3
577	298	Q8R1G6|PDLI2_MOUSE	177.31	25	25	5835.7	6	6	12	Carbamidomethylation; Deamidation (NQ)	37703	PDZ and LIM domain protein 2 OS=Mus musculus OX=10090 GN=Pdlim2 PE=1 SV=1
643	373	Q3UJB9|EDC4_MOUSE	177.11	7	7	3880.4	7	7	10	Carbamidomethylation; Oxidation (M); Acetylation (Protein N-term)	152483	Enhancer of mRNA-decapping protein 4 OS=Mus musculus OX=10090 GN=Edc4 PE=1 SV=2
527	897	Q9D0D4|DIM1_MOUSE	176.89	28	28	9765.1	9	9	13	Carbamidomethylation; Oxidation (M); Deamidation (NQ)	35274	Probable dimethyladenosine transferase OS=Mus musculus OX=10090 GN=Dimt1 PE=2 SV=1
572	600	Q9D0B0|SRSF9_MOUSE	176.65	31	31	15239	6	6	12	Carbamidomethylation; Oxidation (M); Deamidation (NQ)	25661	Serine/arginine-rich splicing factor 9 OS=Mus musculus OX=10090 GN=Srsf9 PE=1 SV=1
645	509	Q8VDF2|UHRF1_MOUSE	176.47	10	10	2888.2	7	7	10	Carbamidomethylation	88304	E3 ubiquitin-protein ligase UHRF1 OS=Mus musculus OX=10090 GN=Uhrf1 PE=1 SV=2
298	312	Q3TJZ6|FA98A_MOUSE	176.33	14	14	20159	6	4	26	Carbamidomethylation; Oxidation (M); Deamidation (NQ)	55055	Protein FAM98A OS=Mus musculus OX=10090 GN=Fam98a PE=1 SV=1
749	268	P97447|FHL1_MOUSE	176.13	22	22	6442.1	5	5	8	Carbamidomethylation	31889	Four and a half LIM domains protein 1 OS=Mus musculus OX=10090 GN=Fhl1 PE=1 SV=3
210	369	P04104|K2C1_MOUSE	176.02	5	5	80592	4	2	39	Deamidation (NQ)	65606	Keratin type II cytoskeletal 1 OS=Mus musculus OX=10090 GN=Krt1 PE=1 SV=4
559	482	Q8C4J7|TBL3_MOUSE	175.97	12	12	2479.6	8	8	12	Carbamidomethylation; Acetylation (Protein N-term)	88266	Transducin beta-like protein 3 OS=Mus musculus OX=10090 GN=Tbl3 PE=2 SV=1
544	497	Q61103|REQU_MOUSE	175.77	22	22	8473.9	7	7	13	Carbamidomethylation; Acetylation (Protein N-term)	44230	Zinc finger protein ubi-d4 OS=Mus musculus OX=10090 GN=Dpf2 PE=1 SV=1
623	244	Q68FD5|CLH1_MOUSE	175.7	5	5	3062.5	6	6	10	Carbamidomethylation	191555	Clathrin heavy chain 1 OS=Mus musculus OX=10090 GN=Cltc PE=1 SV=3
644	1110	Q3TJD7|PDLI7_MOUSE	175.2	19	19	4961.8	7	7	10	Carbamidomethylation; Deamidation (NQ)	50119	PDZ and LIM domain protein 7 OS=Mus musculus OX=10090 GN=Pdlim7 PE=1 SV=1
560	955	Q05186|RCN1_MOUSE	175.11	20	20	19143	6	6	12		38113	Reticulocalbin-1 OS=Mus musculus OX=10090 GN=Rcn1 PE=1 SV=1
483	625	P70279|SURF6_MOUSE	175.04	25	25	6526.7	8	8	15	Carbamidomethylation	41235	Surfeit locus protein 6 OS=Mus musculus OX=10090 GN=Surf6 PE=1 SV=1
230	484	P01630|KV2A6_MOUSE	174.81	42	42	257150	4	4	35	Carbamidomethylation; Oxidation (M); Deamidation (NQ)	12496	Ig kappa chain V-II region 7S34.1 OS=Mus musculus OX=10090 PE=1 SV=1
741	1558	Q99LL5|PWP1_MOUSE	174.66	13	13	9540.9	6	6	8	Carbamidomethylation	55587	Periodic tryptophan protein 1 homolog OS=Mus musculus OX=10090 GN=Pwp1 PE=1 SV=1
208	562	Q6IFZ6|K2C1B_MOUSE	174.63	6	6	56049	5	1	40	Deamidation (NQ)	61359	Keratin type II cytoskeletal 1b OS=Mus musculus OX=10090 GN=Krt77 PE=1 SV=1
615	909	Q8C7V3|UTP15_MOUSE	174.56	19	19	9911.5	7	7	11	Carbamidomethylation; Acetylation (Protein N-term)	59375	U3 small nucleolar RNA-associated protein 15 homolog OS=Mus musculus OX=10090 GN=Utp15 PE=1 SV=1
502	16740	Q60737|CSK21_MOUSE	174.55	18	18	5920.7	6	6	14	Deamidation (NQ)	45134	Casein kinase II subunit alpha OS=Mus musculus OX=10090 GN=Csnk2a1 PE=1 SV=2
396	449	P62141|PP1B_MOUSE	174.35	23	23	16532	6	3	19	Carbamidomethylation; Oxidation (M); Acetylation (Protein N-term)	37187	Serine/threonine-protein phosphatase PP1-beta catalytic subunit OS=Mus musculus OX=10090 GN=Ppp1cb PE=1 SV=3
485	434	Q6IFX2|K1C42_MOUSE	174.34	18	18	3828	7	2	15	Oxidation (M); Deamidation (NQ)	50133	Keratin type I cytoskeletal 42 OS=Mus musculus OX=10090 GN=Krt42 PE=1 SV=1
607	204	Q9Z0N1|IF2G_MOUSE	174.11	18	18	9552.4	6	6	11	Carbamidomethylation; Acetylation (Protein N-term)	51066	Eukaryotic translation initiation factor 2 subunit 3 X-linked OS=Mus musculus OX=10090 GN=Eif2s3x PE=1 SV=2
675	651	P67778|PHB_MOUSE	174	26	26	2575.1	6	6	9		29820	Prohibitin OS=Mus musculus OX=10090 GN=Phb PE=1 SV=1
624	323	Q8R323|RFC3_MOUSE	173.92	16	16	5713.1	5	5	10		40526	Replication factor C subunit 3 OS=Mus musculus OX=10090 GN=Rfc3 PE=1 SV=1
658	364	Q8R3N1|NOP14_MOUSE	173.77	7	7	4527.7	6	6	9		98769	Nucleolar protein 14 OS=Mus musculus OX=10090 GN=Nop14 PE=1 SV=2
657	1282	Q5SFM8|RBM27_MOUSE	173.73	7	7	4495.1	8	7	9		118551	RNA-binding protein 27 OS=Mus musculus OX=10090 GN=Rbm27 PE=1 SV=3
478	589	P21619|LMNB2_MOUSE	173.59	16	16	1359.7	8	7	15	Deamidation (NQ)	67318	Lamin-B2 OS=Mus musculus OX=10090 GN=Lmnb2 PE=1 SV=2
450	6803	Q8BU03|PWP2_MOUSE	173.55	10	10	5370.6	8	8	16	Oxidation (M)	102910	Periodic tryptophan protein 2 homolog OS=Mus musculus OX=10090 GN=Pwp2 PE=1 SV=1
649	1415	Q9Z1Q9|SYVC_MOUSE	173.51	6	6	2395.3	5	5	10		140215	Valine--tRNA ligase OS=Mus musculus OX=10090 GN=Vars1 PE=1 SV=1
945	837	Q9Z1Y4|TRIP6_MOUSE	173.27	12	12	1699.5	4	4	5	Carbamidomethylation	50934	Thyroid receptor-interacting protein 6 OS=Mus musculus OX=10090 GN=Trip6 PE=1 SV=1
284	192	P08553|NFM_MOUSE	172.97	11	11	12806	8	7	28	Acetylation (Protein N-term); Deamidation (NQ)	95916	Neurofilament medium polypeptide OS=Mus musculus OX=10090 GN=Nefm PE=1 SV=4
819	1115	Q9CZX5|PINX1_MOUSE	172.96	19	19	6841.7	5	5	7	Carbamidomethylation	37221	PIN2/TERF1-interacting telomerase inhibitor 1 OS=Mus musculus OX=10090 GN=Pinx1 PE=1 SV=2
517	10827	P56960|EXOSX_MOUSE	172.95	10	10	2590.1	7	7	14	Carbamidomethylation	100942	Exosome component 10 OS=Mus musculus OX=10090 GN=Exosc10 PE=1 SV=2
523	383	Q9Z2N8|ACL6A_MOUSE	172.9	17	17	6972.1	6	6	14	Carbamidomethylation; Oxidation (M)	47448	Actin-like protein 6A OS=Mus musculus OX=10090 GN=Actl6a PE=1 SV=2
728	264	Q9D0R4|DDX56_MOUSE	172.89	12	12	4693.7	5	5	8	Carbamidomethylation; Oxidation (M); Acetylation (Protein N-term)	61212	Probable ATP-dependent RNA helicase DDX56 OS=Mus musculus OX=10090 GN=Ddx56 PE=2 SV=1
656	238	O88379|BAZ1A_MOUSE	172.65	5	5	2430.3	6	6	9	Carbamidomethylation	178458	Bromodomain adjacent to zinc finger domain protein 1A OS=Mus musculus OX=10090 GN=Baz1a PE=1 SV=3
538	5068	Q9D0F6|RFC5_MOUSE	172.49	28	28	6885.7	7	7	13	Carbamidomethylation; Oxidation (M); Acetylation (Protein N-term)	38096	Replication factor C subunit 5 OS=Mus musculus OX=10090 GN=Rfc5 PE=1 SV=1
637	263	Q9EQ61|PESC_MOUSE	172.39	11	11	8353.3	6	6	10	Oxidation (M)	67796	Pescadillo homolog OS=Mus musculus OX=10090 GN=Pes1 PE=1 SV=1
629	935	O55135|IF6_MOUSE	172.29	30	30	13466	5	5	10	Carbamidomethylation; Deamidation (NQ)	26511	Eukaryotic translation initiation factor 6 OS=Mus musculus OX=10090 GN=Eif6 PE=1 SV=2
789	608	Q02053|UBA1_MOUSE	172.29	7	7	1269.9	5	5	7	Carbamidomethylation	117809	Ubiquitin-like modifier-activating enzyme 1 OS=Mus musculus OX=10090 GN=Uba1 PE=1 SV=1
760	9584	Q5DW34|EHMT1_MOUSE	171.98	5	5	2206	5	5	7	Carbamidomethylation; Acetylation (Protein N-term)	141999	Histone-lysine N-methyltransferase EHMT1 OS=Mus musculus OX=10090 GN=Ehmt1 PE=1 SV=2
390	1372	Q9CRB2|NHP2_MOUSE	171.98	31	31	36852	4	4	19	Carbamidomethylation; Deamidation (NQ)	17247	H/ACA ribonucleoprotein complex subunit 2 OS=Mus musculus OX=10090 GN=Nhp2 PE=1 SV=1
446	633	Q8CCS6|PABP2_MOUSE	171.82	28	28	13919	5	5	16	Acetylation (Protein N-term)	32297	Polyadenylate-binding protein 2 OS=Mus musculus OX=10090 GN=Pabpn1 PE=1 SV=3
583	16999	Q80VI1|TRI56_MOUSE	171.12	10	10	5089.1	6	6	12		79513	E3 ubiquitin-protein ligase TRIM56 OS=Mus musculus OX=10090 GN=Trim56 PE=1 SV=1
594	1416	P42932|TCPQ_MOUSE	170.57	16	16	3512.6	7	7	11	Carbamidomethylation	59556	T-complex protein 1 subunit theta OS=Mus musculus OX=10090 GN=Cct8 PE=1 SV=3
584	1153	Q9Z0H3|SNF5_MOUSE	170.39	17	17	5899.6	6	6	12		44141	SWI/SNF-related matrix-associated actin-dependent regulator of chromatin subfamily B member 1 OS=Mus musculus OX=10090 GN=Smarcb1 PE=1 SV=1
340	508	P09450|JUNB_MOUSE	170.3	33	33	6920	6	6	23	Oxidation (M); Acetylation (Protein N-term); Deamidation (NQ)	35765	Transcription factor jun-B OS=Mus musculus OX=10090 GN=Junb PE=1 SV=1
193	7853	P62849|RS24_MOUSE	170.05	37	37	78768	5	5	43	Oxidation (M); Acetylation (Protein N-term)	15423	40S ribosomal protein S24 OS=Mus musculus OX=10090 GN=Rps24 PE=1 SV=1
395	586	Q9CQV8|1433B_MOUSE	169.84	38	38	1264.3	7	5	19	Oxidation (M)	28086	14-3-3 protein beta/alpha OS=Mus musculus OX=10090 GN=Ywhab PE=1 SV=3
320	609	Q6ZQ58|LARP1_MOUSE	169.83	13	13	7348.5	9	9	24	Oxidation (M); Acetylation (Protein N-term); Deamidation (NQ)	121125	La-related protein 1 OS=Mus musculus OX=10090 GN=Larp1 PE=1 SV=3
682	631	Q9R1Z8|VINEX_MOUSE	169.75	8	8	2899.7	4	4	9	Oxidation (M); Deamidation (NQ)	82349	Vinexin OS=Mus musculus OX=10090 GN=Sorbs3 PE=1 SV=1
774	245	Q6NWW9|FND3B_MOUSE	169.65	6	6	1941.2	6	6	7	Carbamidomethylation	132764	Fibronectin type III domain-containing protein 3B OS=Mus musculus OX=10090 GN=Fndc3b PE=1 SV=1
773	568	Q8K301|DDX52_MOUSE	169.43	14	14	9261.2	7	7	7	Carbamidomethylation	67474	Probable ATP-dependent RNA helicase DDX52 OS=Mus musculus OX=10090 GN=Ddx52 PE=2 SV=2
752	16744	Q91WE2|PIP30_MOUSE	169.22	19	19	3653.3	4	4	8	Oxidation (M); Acetylation (Protein N-term)	28702	PSME3-interacting protein OS=Mus musculus OX=10090 GN=Psme3ip1 PE=1 SV=1
839	338	Q8BMS1|ECHA_MOUSE	169.05	11	11	2543.4	5	5	6	Carbamidomethylation	82670	Trifunctional enzyme subunit alpha mitochondrial OS=Mus musculus OX=10090 GN=Hadha PE=1 SV=1
875	1663	B2RY56|RBM25_MOUSE	168.84	8	8	1991.5	6	6	6		99552	RNA-binding protein 25 OS=Mus musculus OX=10090 GN=Rbm25 PE=1 SV=2
546	235	Q8BGZ7|K2C75_MOUSE	168.8	9	9	525.35	6	1	13	Carbamidomethylation	59741	Keratin type II cytoskeletal 75 OS=Mus musculus OX=10090 GN=Krt75 PE=1 SV=1
792	247	P97314|CSRP2_MOUSE	168.63	30	30	4738	4	4	7	Carbamidomethylation; Oxidation (M)	20926	Cysteine and glycine-rich protein 2 OS=Mus musculus OX=10090 GN=Csrp2 PE=1 SV=3
787	490	P80318|TCPG_MOUSE	168.16	12	12	2821.1	6	6	7	Carbamidomethylation	60630	T-complex protein 1 subunit gamma OS=Mus musculus OX=10090 GN=Cct3 PE=1 SV=1
474	618	Q9CY58|PAIRB_MOUSE	167.84	18	18	2906.3	6	6	15		44714	Plasminogen activator inhibitor 1 RNA-binding protein OS=Mus musculus OX=10090 GN=Serbp1 PE=1 SV=2
786	516	Q3TFK5|GPTC4_MOUSE	167.66	23	23	5772.3	6	6	7	Carbamidomethylation	46554	G patch domain-containing protein 4 OS=Mus musculus OX=10090 GN=Gpatch4 PE=1 SV=1
726	190	P26231|CTNA1_MOUSE	167.63	9	9	4599.7	6	6	8	Carbamidomethylation; Acetylation (Protein N-term)	100106	Catenin alpha-1 OS=Mus musculus OX=10090 GN=Ctnna1 PE=1 SV=1
622	466	P10107|ANXA1_MOUSE	167.34	19	19	3342.4	5	5	10	Carbamidomethylation	38734	Annexin A1 OS=Mus musculus OX=10090 GN=Anxa1 PE=1 SV=2
348	904	P16045|LEG1_MOUSE	167.12	53	53	9091.6	5	5	22	Carbamidomethylation; Oxidation (M); Acetylation (Protein N-term); Deamidation (NQ)	14866	Galectin-1 OS=Mus musculus OX=10090 GN=Lgals1 PE=1 SV=3
687	922	P84096|RHOG_MOUSE	166.96	32	32	1091.8	5	5	9	Carbamidomethylation	21308	Rho-related GTP-binding protein RhoG OS=Mus musculus OX=10090 GN=Rhog PE=1 SV=1
592	1082	Q5SXY1|CYTSB_MOUSE	166.84	10	10	3003.2	9	9	11	Carbamidomethylation	118101	Cytospin-B OS=Mus musculus OX=10090 GN=Specc1 PE=1 SV=2
518	370	Q1HFZ0|NSUN2_MOUSE	166.82	12	12	3134.2	7	7	14	Carbamidomethylation; Deamidation (NQ)	85452	RNA cytosine C(5)-methyltransferase NSUN2 OS=Mus musculus OX=10090 GN=Nsun2 PE=1 SV=2
747	584	Q9QZD9|EIF3I_MOUSE	166.71	20	20	5237.3	6	6	8	Carbamidomethylation	36461	Eukaryotic translation initiation factor 3 subunit I OS=Mus musculus OX=10090 GN=Eif3i PE=1 SV=1
539	1235	Q6PE01|SNR40_MOUSE	166.59	28	28	6133.1	8	8	13	Carbamidomethylation; Oxidation (M)	39276	U5 small nuclear ribonucleoprotein 40 kDa protein OS=Mus musculus OX=10090 GN=Snrnp40 PE=1 SV=1
491	920	P63087|PP1G_MOUSE	166.57	18	18	4247.9	5	2	15	Carbamidomethylation; Acetylation (Protein N-term)	36984	Serine/threonine-protein phosphatase PP1-gamma catalytic subunit OS=Mus musculus OX=10090 GN=Ppp1cc PE=1 SV=1
826	1243	P26350|PTMA_MOUSE	166.55	26	26	9628	4	4	7	Acetylation (Protein N-term)	12254	Prothymosin alpha OS=Mus musculus OX=10090 GN=Ptma PE=1 SV=2
765	903	P97855|G3BP1_MOUSE	166.46	17	17	3532.5	5	5	7	Deamidation (NQ)	51829	Ras GTPase-activating protein-binding protein 1 OS=Mus musculus OX=10090 GN=G3bp1 PE=1 SV=1
734	1386	Q810D6|GRWD1_MOUSE	165.79	15	15	5289.5	4	4	8	Carbamidomethylation	49224	Glutamate-rich WD repeat-containing protein 1 OS=Mus musculus OX=10090 GN=Grwd1 PE=1 SV=2
524	911	P83940|ELOC_MOUSE	165.66	58	58	5803.9	5	5	14	Carbamidomethylation; Oxidation (M)	12473	Elongin-C OS=Mus musculus OX=10090 GN=Eloc PE=1 SV=1
353	385	Q99K48|NONO_MOUSE	165.61	16	16	12169	6	6	21	Oxidation (M); Deamidation (NQ)	54541	Non-POU domain-containing octamer-binding protein OS=Mus musculus OX=10090 GN=Nono PE=1 SV=3
459	289	Q61792|LASP1_MOUSE	165.57	24	24	9306.7	6	6	16	Oxidation (M); Deamidation (NQ)	29994	LIM and SH3 domain protein 1 OS=Mus musculus OX=10090 GN=Lasp1 PE=1 SV=1
222	1480	P62267|RS23_MOUSE	165.56	30	30	227610	5	5	36	Deamidation (NQ)	15808	40S ribosomal protein S23 OS=Mus musculus OX=10090 GN=Rps23 PE=1 SV=3
616	314	Q9WTX2|PRKRA_MOUSE	165.43	22	22	3247.5	6	6	11	Carbamidomethylation	34371	Interferon-inducible double-stranded RNA-dependent protein kinase activator A OS=Mus musculus OX=10090 GN=Prkra PE=1 SV=1
481	407	Q61696|HS71A_MOUSE	165.3	9	9	430.06	5	1	15	Deamidation (NQ)	70079	Heat shock 70 kDa protein 1A OS=Mus musculus OX=10090 GN=Hspa1a PE=1 SV=2
481	408	P17879|HS71B_MOUSE	165.3	9	9	430.06	5	1	15	Deamidation (NQ)	70176	Heat shock 70 kDa protein 1B OS=Mus musculus OX=10090 GN=Hspa1b PE=1 SV=3
704	496	Q69ZN7|MYOF_MOUSE	165.21	5	5	1774.8	7	7	8		233322	Myoferlin OS=Mus musculus OX=10090 GN=Myof PE=1 SV=2
541	879	Q9JJ80|RPF2_MOUSE	164.71	17	17	14890	4	4	13	Oxidation (M); Deamidation (NQ)	35364	Ribosome production factor 2 homolog OS=Mus musculus OX=10090 GN=Rpf2 PE=2 SV=2
425	1032	P21550|ENOB_MOUSE	164.65	18	18	1119	4	2	17	Carbamidomethylation; Deamidation (NQ)	47025	Beta-enolase OS=Mus musculus OX=10090 GN=Eno3 PE=1 SV=3
261	877	P83882|RL36A_MOUSE	164.62	40	40	178920	5	5	32	Carbamidomethylation; Deamidation (NQ)	12441	60S ribosomal protein L36a OS=Mus musculus OX=10090 GN=Rpl36a PE=3 SV=2
549	1527	Q91YQ5|RPN1_MOUSE	164.56	9	9	2977.6	5	5	13		68528	Dolichyl-diphosphooligosaccharide--protein glycosyltransferase subunit 1 OS=Mus musculus OX=10090 GN=Rpn1 PE=1 SV=1
257	591	O08583|THOC4_MOUSE	164.34	16	16	52853	4	4	32	Oxidation (M); Acetylation (Protein N-term); Deamidation (NQ)	26940	THO complex subunit 4 OS=Mus musculus OX=10090 GN=Alyref PE=1 SV=3
767	367	Q69ZA1|CDK13_MOUSE	164.16	6	6	999.93	6	6	7		164552	Cyclin-dependent kinase 13 OS=Mus musculus OX=10090 GN=Cdk13 PE=1 SV=3
678	315	Q08093|CNN2_MOUSE	164.13	22	22	3764.7	6	5	9	Carbamidomethylation; Oxidation (M); Acetylation (Protein N-term)	33156	Calponin-2 OS=Mus musculus OX=10090 GN=Cnn2 PE=1 SV=1
553	325	Q8BX10|PGAM5_MOUSE	164.01	21	21	16930	6	6	13	Oxidation (M)	31994	Serine/threonine-protein phosphatase PGAM5 mitochondrial OS=Mus musculus OX=10090 GN=Pgam5 PE=1 SV=1
511	457	Q8BQZ5|CPSF4_MOUSE	163.85	28	28	5433.2	4	4	14	Carbamidomethylation; Oxidation (M)	23653	Cleavage and polyadenylation specificity factor subunit 4 OS=Mus musculus OX=10090 GN=Cpsf4 PE=2 SV=1
609	926	Q8BFR5|EFTU_MOUSE	163.29	13	13	3843	5	5	11	Oxidation (M)	49508	Elongation factor Tu mitochondrial OS=Mus musculus OX=10090 GN=Tufm PE=1 SV=1
683	424	Q9CQR2|RS21_MOUSE	163.26	59	59	3981.7	5	5	9	Carbamidomethylation; Oxidation (M); Acetylation (Protein N-term); Deamidation (NQ)	9141	40S ribosomal protein S21 OS=Mus musculus OX=10090 GN=Rps21 PE=1 SV=1
885	916	Q8BU11|TOX4_MOUSE	163.23	14	14	3339.3	6	6	6	Carbamidomethylation	65961	TOX high mobility group box family member 4 OS=Mus musculus OX=10090 GN=Tox4 PE=1 SV=3
686	270	Q9D0R8|LSM12_MOUSE	163.07	30	30	29919	4	4	9	Carbamidomethylation; Acetylation (Protein N-term)	21701	Protein LSM12 homolog OS=Mus musculus OX=10090 GN=Lsm12 PE=1 SV=1
456	917	Q9D1G1|RAB1B_MOUSE	163.02	37	37	1485.4	6	2	16	Oxidation (M); Acetylation (Protein N-term)	22187	Ras-related protein Rab-1B OS=Mus musculus OX=10090 GN=Rab1b PE=1 SV=1
754	426	Q9CXL3|CG050_MOUSE	163.01	28	28	12391	4	4	8		22168	Uncharacterized protein C7orf50 homolog OS=Mus musculus OX=10090 PE=1 SV=3
636	419	Q9D753|EXOS8_MOUSE	162.91	28	28	3897.6	6	6	10	Carbamidomethylation	29949	Exosome complex component RRP43 OS=Mus musculus OX=10090 GN=Exosc8 PE=1 SV=1
279	1537	Q6ZWV7|RL35_MOUSE	162.73	34	34	124770	5	5	29	Deamidation (NQ)	14553	60S ribosomal protein L35 OS=Mus musculus OX=10090 GN=Rpl35 PE=1 SV=1
580	1483	O09106|HDAC1_MOUSE	162.72	14	14	1390.5	6	3	12	Carbamidomethylation; Oxidation (M)	55075	Histone deacetylase 1 OS=Mus musculus OX=10090 GN=Hdac1 PE=1 SV=1
666	1232	Q6NZN0|RBM26_MOUSE	162.71	8	8	1457.1	5	4	9	Carbamidomethylation; Deamidation (NQ)	114143	RNA-binding protein 26 OS=Mus musculus OX=10090 GN=Rbm26 PE=1 SV=2
256	575	Q9D1R9|RL34_MOUSE	162.71	25	25	203640	7	7	32	Deamidation (NQ)	13293	60S ribosomal protein L34 OS=Mus musculus OX=10090 GN=Rpl34 PE=1 SV=2
771	7537	Q3UMC0|AFG2H_MOUSE	162.69	8	8	1590.3	5	4	7		97256	ATPase family protein 2 homolog OS=Mus musculus OX=10090 GN=Spata5 PE=1 SV=2
520	896	Q99JY9|ARP3_MOUSE	162.63	17	17	3829.4	6	6	14	Carbamidomethylation; Oxidation (M)	47357	Actin-related protein 3 OS=Mus musculus OX=10090 GN=Actr3 PE=1 SV=3
742	1553	P97452|BOP1_MOUSE	162.4	8	8	5431.9	5	5	8	Carbamidomethylation; Oxidation (M)	82546	Ribosome biogenesis protein BOP1 OS=Mus musculus OX=10090 GN=Bop1 PE=1 SV=1
608	458	O88342|WDR1_MOUSE	162.3	12	12	3648.6	5	5	11	Carbamidomethylation	66407	WD repeat-containing protein 1 OS=Mus musculus OX=10090 GN=Wdr1 PE=1 SV=3
635	8451	Q9CSN1|SNW1_MOUSE	162.24	13	13	2879.8	6	6	10		61476	SNW domain-containing protein 1 OS=Mus musculus OX=10090 GN=Snw1 PE=1 SV=3
665	7792	O88665|BRD7_MOUSE	162.09	12	12	1703.7	5	5	9	Carbamidomethylation; Oxidation (M); Deamidation (NQ)	74000	Bromodomain-containing protein 7 OS=Mus musculus OX=10090 GN=Brd7 PE=1 SV=1
528	637	Q9CYH6|RRS1_MOUSE	162.09	16	16	11995	5	5	13		41552	Ribosome biogenesis regulatory protein homolog OS=Mus musculus OX=10090 GN=Rrs1 PE=1 SV=1
314	858	O08992|SDCB1_MOUSE	161.86	22	22	18812	6	6	25	Carbamidomethylation; Oxidation (M); Acetylation (Protein N-term); Deamidation (NQ)	32379	Syntenin-1 OS=Mus musculus OX=10090 GN=Sdcbp PE=1 SV=1
647	358	Q91WK2|EIF3H_MOUSE	161.78	20	20	7014.5	6	6	10		39832	Eukaryotic translation initiation factor 3 subunit H OS=Mus musculus OX=10090 GN=Eif3h PE=1 SV=1
730	593	Q8BGA5|KRR1_MOUSE	161.56	15	15	5759.6	5	5	8	Carbamidomethylation; Oxidation (M)	43538	KRR1 small subunit processome component homolog OS=Mus musculus OX=10090 GN=Krr1 PE=2 SV=1
558	1498	P62821|RAB1A_MOUSE	161.25	38	38	544.2	6	2	12	Oxidation (M); Acetylation (Protein N-term)	22678	Ras-related protein Rab-1A OS=Mus musculus OX=10090 GN=Rab1A PE=1 SV=3
507	173	Q60838|DVL2_MOUSE	161.19	10	10	1734.7	6	6	14		78861	Segment polarity protein dishevelled homolog DVL-2 OS=Mus musculus OX=10090 GN=Dvl2 PE=1 SV=2
727	684	Q8CHY6|P66A_MOUSE	161.03	16	16	2785.4	6	6	8	Deamidation (NQ)	67334	Transcriptional repressor p66 alpha OS=Mus musculus OX=10090 GN=Gatad2a PE=1 SV=2
779	918	Q9DCH4|EIF3F_MOUSE	160.84	17	17	3052	5	5	7	Oxidation (M)	37984	Eukaryotic translation initiation factor 3 subunit F OS=Mus musculus OX=10090 GN=Eif3f PE=1 SV=2
251	1444	P51410|RL9_MOUSE	160.59	26	26	60837	5	5	33	Carbamidomethylation; Oxidation (M); Deamidation (NQ)	21881	60S ribosomal protein L9 OS=Mus musculus OX=10090 GN=Rpl9 PE=2 SV=2
781	830	P61161|ARP2_MOUSE	160.58	13	13	4050.7	5	5	7	Carbamidomethylation; Oxidation (M); Deamidation (NQ)	44761	Actin-related protein 2 OS=Mus musculus OX=10090 GN=Actr2 PE=1 SV=1
820	472	Q9Z1Z2|STRAP_MOUSE	160.58	17	17	2866.2	4	4	7		38442	Serine-threonine kinase receptor-associated protein OS=Mus musculus OX=10090 GN=Strap PE=1 SV=2
626	581	Q80Y19|RHGBA_MOUSE	160.35	10	10	1940.7	7	7	10	Carbamidomethylation	108436	Rho GTPase-activating protein 11A OS=Mus musculus OX=10090 GN=Arhgap11a PE=1 SV=2
526	347	Q8BIE6|FRM4A_MOUSE	160.01	7	7	10746	5	5	13	Oxidation (M); Deamidation (NQ)	113879	FERM domain-containing protein 4A OS=Mus musculus OX=10090 GN=Frmd4a PE=1 SV=2
887	878	Q9QYJ0|DNJA2_MOUSE	159.68	10	10	6583.9	4	4	6	Carbamidomethylation; Deamidation (NQ)	45746	DnaJ homolog subfamily A member 2 OS=Mus musculus OX=10090 GN=Dnaja2 PE=1 SV=1
861	7423	Q922R8|PDIA6_MOUSE	159.63	17	17	773.23	5	5	6		48100	Protein disulfide-isomerase A6 OS=Mus musculus OX=10090 GN=Pdia6 PE=1 SV=3
664	543	Q3UFB2|BCD1_MOUSE	159.63	18	18	3274.7	7	7	9	Carbamidomethylation; Acetylation (Protein N-term)	52213	Box C/D snoRNA protein 1 OS=Mus musculus OX=10090 GN=Znhit6 PE=1 SV=2
705	572	Q922D8|C1TC_MOUSE	159.55	6	6	686.38	4	4	8		101200	C-1-tetrahydrofolate synthase cytoplasmic OS=Mus musculus OX=10090 GN=Mthfd1 PE=1 SV=4
522	1594	Q91WM3|U3IP2_MOUSE	159.54	12	12	4277.1	6	6	14		52107	U3 small nucleolar RNA-interacting protein 2 OS=Mus musculus OX=10090 GN=Rrp9 PE=1 SV=1
708	1286	Q9QY06|MYO9B_MOUSE	159.52	4	4	422.13	6	5	8	Carbamidomethylation	238832	Unconventional myosin-IXb OS=Mus musculus OX=10090 GN=Myo9b PE=1 SV=2
776	953	Q9Z103|ADNP_MOUSE	159.44	7	7	2463.6	6	6	7	Deamidation (NQ)	124308	Activity-dependent neuroprotector homeobox protein OS=Mus musculus OX=10090 GN=Adnp PE=1 SV=2
679	4452	Q02248|CTNB1_MOUSE	159.38	8	8	3494.3	5	5	9	Oxidation (M)	85471	Catenin beta-1 OS=Mus musculus OX=10090 GN=Ctnnb1 PE=1 SV=1
634	335	P60229|EIF3E_MOUSE	159.08	16	16	7692.2	7	7	10	Oxidation (M)	52221	Eukaryotic translation initiation factor 3 subunit E OS=Mus musculus OX=10090 GN=Eif3e PE=1 SV=1
851	1086	P14733|LMNB1_MOUSE	158.98	10	10	1170.8	5	4	6		66786	Lamin-B1 OS=Mus musculus OX=10090 GN=Lmnb1 PE=1 SV=3
676	1678	P97379|G3BP2_MOUSE	158.89	12	12	6355.8	5	5	9		54088	Ras GTPase-activating protein-binding protein 2 OS=Mus musculus OX=10090 GN=G3bp2 PE=1 SV=2
822	1376	Q80UU2|RPP38_MOUSE	158.89	25	25	2128.5	4	4	7		31129	Ribonuclease P protein subunit p38 OS=Mus musculus OX=10090 GN=Rpp38 PE=1 SV=1
579	1247	O54946|DNJB6_MOUSE	158.88	22	22	6455.3	6	5	12	Carbamidomethylation; Acetylation (Protein N-term); Deamidation (NQ)	39807	DnaJ homolog subfamily B member 6 OS=Mus musculus OX=10090 GN=Dnajb6 PE=1 SV=4
731	422	Q9EQI8|RM46_MOUSE	158.72	20	20	2774.4	5	5	8	Oxidation (M)	32132	39S ribosomal protein L46 mitochondrial OS=Mus musculus OX=10090 GN=Mrpl46 PE=1 SV=1
617	1435	P03987|IGHG3_MOUSE	158.54	15	15	3671	5	5	11		43929	Ig gamma-3 chain C region OS=Mus musculus OX=10090 PE=1 SV=2
591	8541	E9Q6J5|BD1L1_MOUSE	158.47	3	3	269.94	7	7	11	Carbamidomethylation	327453	Biorientation of chromosomes in cell division protein 1-like 1 OS=Mus musculus OX=10090 GN=Bod1l PE=1 SV=1
788	393	Q7TMF2|ERI1_MOUSE	158.22	20	20	3864.4	6	6	7	Carbamidomethylation; Deamidation (NQ)	39493	3'-5' exoribonuclease 1 OS=Mus musculus OX=10090 GN=Eri1 PE=1 SV=2
587	7852	P60867|RS20_MOUSE	158.13	23	23	48894	3	3	12		13373	40S ribosomal protein S20 OS=Mus musculus OX=10090 GN=Rps20 PE=1 SV=1
508	550	P70670|NACAM_MOUSE	158.06	2	2	13242	3	3	14		220497	Nascent polypeptide-associated complex subunit alpha muscle-specific form OS=Mus musculus OX=10090 GN=Naca PE=1 SV=2
508	1392	Q60817|NACA_MOUSE	158.06	20	20	13242	3	3	14		23384	Nascent polypeptide-associated complex subunit alpha OS=Mus musculus OX=10090 GN=Naca PE=1 SV=1
582	612	P60843|IF4A1_MOUSE	157.84	16	16	2228.8	6	5	12	Oxidation (M)	46154	Eukaryotic initiation factor 4A-I OS=Mus musculus OX=10090 GN=Eif4a1 PE=1 SV=1
674	735	Q921N6|DDX27_MOUSE	157.37	9	9	4213.1	6	6	9		85939	Probable ATP-dependent RNA helicase DDX27 OS=Mus musculus OX=10090 GN=Ddx27 PE=1 SV=3
92	882	P62843|RS15_MOUSE	157.37	22	22	99476	3	3	86	Oxidation (M); Deamidation (NQ)	17040	40S ribosomal protein S15 OS=Mus musculus OX=10090 GN=Rps15 PE=1 SV=2
791	536	Q62465|VAT1_MOUSE	157.29	16	16	15739	5	5	7	Carbamidomethylation; Oxidation (M)	43097	Synaptic vesicle membrane protein VAT-1 homolog OS=Mus musculus OX=10090 GN=Vat1 PE=1 SV=3
597	257	Q80VY9|DHX33_MOUSE	157.13	14	14	5907.3	8	8	11		78347	ATP-dependent RNA helicase DHX33 OS=Mus musculus OX=10090 GN=Dhx33 PE=1 SV=1
748	304	Q9WVK4|EHD1_MOUSE	157.05	14	14	2000.9	6	6	8	Oxidation (M); Deamidation (NQ)	60603	EH domain-containing protein 1 OS=Mus musculus OX=10090 GN=Ehd1 PE=1 SV=1
922	2017	Q9EP89|LACTB_MOUSE	157.03	10	10	3952.3	5	5	5		60706	Serine beta-lactamase-like protein LACTB mitochondrial OS=Mus musculus OX=10090 GN=Lactb PE=1 SV=1
673	7433	P19324|SERPH_MOUSE	156.9	12	12	4124.4	4	4	9		46534	Serpin H1 OS=Mus musculus OX=10090 GN=Serpinh1 PE=1 SV=3
778	1632	Q640N1|AEBP1_MOUSE	156.81	6	6	1922.3	5	5	7	Carbamidomethylation; Deamidation (NQ)	128365	Adipocyte enhancer-binding protein 1 OS=Mus musculus OX=10090 GN=Aebp1 PE=1 SV=1
713	493	Q148V8|FA83H_MOUSE	156.68	5	5	1317	4	4	8		131115	Protein FAM83H OS=Mus musculus OX=10090 GN=Fam83h PE=1 SV=1
735	465	P29391|FRIL1_MOUSE	156.58	31	31	2651.6	4	4	8	Oxidation (M)	20802	Ferritin light chain 1 OS=Mus musculus OX=10090 GN=Ftl1 PE=1 SV=2
818	18537	E9PYH6|SET1A_MOUSE	156.53	4	4	1505.4	5	5	7		186058	Histone-lysine N-methyltransferase SETD1A OS=Mus musculus OX=10090 GN=Setd1a PE=1 SV=1
574	860	P52432|RPAC1_MOUSE	156.5	18	18	1858.1	5	5	12	Oxidation (M); Acetylation (Protein N-term)	39107	DNA-directed RNA polymerases I and III subunit RPAC1 OS=Mus musculus OX=10090 GN=Polr1c PE=1 SV=3
860	3065	Q8BZR9|NCBP3_MOUSE	156.36	14	14	2312.5	6	6	6		70043	Nuclear cap-binding protein subunit 3 OS=Mus musculus OX=10090 GN=Ncbp3 PE=1 SV=1
874	900	Q5XFZ0|CR021_MOUSE	156.31	29	29	2738.8	5	5	6	Carbamidomethylation; Deamidation (NQ)	24123	UPF0711 protein C18orf21 homolog OS=Mus musculus OX=10090 PE=2 SV=2
696	261	Q8BTV2|CPSF7_MOUSE	156.19	13	13	5027.8	5	5	9		52011	Cleavage and polyadenylation specificity factor subunit 7 OS=Mus musculus OX=10090 GN=Cpsf7 PE=1 SV=2
688	356	P52912|TIA1_MOUSE	155.91	12	12	1521.3	5	1	9	Oxidation (M)	42800	Nucleolysin TIA-1 OS=Mus musculus OX=10090 GN=Tia1 PE=1 SV=1
467	341	O09000|NCOA3_MOUSE	155.89	8	8	1284.1	7	7	16	Carbamidomethylation; Oxidation (M); Acetylation (Protein N-term)	151573	Nuclear receptor coactivator 3 OS=Mus musculus OX=10090 GN=Ncoa3 PE=1 SV=2
901	1380	P26040|EZRI_MOUSE	155.89	8	8	1361.6	4	3	5		69407	Ezrin OS=Mus musculus OX=10090 GN=Ezr PE=1 SV=3
586	391	Q8VDY9|CAAP1_MOUSE	155.67	16	16	10642	4	4	12	Carbamidomethylation; Deamidation (NQ)	37825	Caspase activity and apoptosis inhibitor 1 OS=Mus musculus OX=10090 GN=Caap1 PE=1 SV=2
764	1233	Q8K4Z5|SF3A1_MOUSE	155.57	7	7	1171.6	4	4	7	Oxidation (M)	88545	Splicing factor 3A subunit 1 OS=Mus musculus OX=10090 GN=Sf3a1 PE=1 SV=1
940	317	Q9ERH4|NUSAP_MOUSE	155.56	20	20	1715.5	5	5	5	Carbamidomethylation	48573	Nucleolar and spindle-associated protein 1 OS=Mus musculus OX=10090 GN=Nusap1 PE=1 SV=1
680	940	Q9DCE5|PK1IP_MOUSE	155.39	18	18	1668.9	6	6	9	Carbamidomethylation; Deamidation (NQ)	42116	p21-activated protein kinase-interacting protein 1 OS=Mus musculus OX=10090 GN=Pak1ip1 PE=1 SV=2
750	7888	Q63850|NUP62_MOUSE	155.05	14	14	1652.3	5	5	8	Acetylation (Protein N-term)	53255	Nuclear pore glycoprotein p62 OS=Mus musculus OX=10090 GN=Nup62 PE=1 SV=2
405	7920	P42669|PURA_MOUSE	154.45	33	33	5666.3	6	6	18	Carbamidomethylation; Deamidation (NQ)	34884	Transcriptional activator protein Pur-alpha OS=Mus musculus OX=10090 GN=Pura PE=1 SV=1
540	4023	Q8CFI7|RPB2_MOUSE	154.3	8	8	1123	7	7	13	Deamidation (NQ)	133910	DNA-directed RNA polymerase II subunit RPB2 OS=Mus musculus OX=10090 GN=Polr2b PE=1 SV=2
840	469	P18406|CCN1_MOUSE	154	15	15	2715.7	5	5	6	Carbamidomethylation	41709	CCN family member 1 OS=Mus musculus OX=10090 GN=Ccn1 PE=1 SV=1
662	349	Q8BHD7|PTBP3_MOUSE	153.97	12	12	1981.3	6	5	9	Carbamidomethylation; Oxidation (M)	56701	Polypyrimidine tract-binding protein 3 OS=Mus musculus OX=10090 GN=Ptbp3 PE=1 SV=1
1035	16727	Q921I2|KLDC4_MOUSE	153.91	7	7	1011.6	3	3	4	Carbamidomethylation	64861	Kelch domain-containing protein 4 OS=Mus musculus OX=10090 GN=Klhdc4 PE=2 SV=2
356	144	P08551|NFL_MOUSE	153.82	8	8	1787.6	4	3	21	Deamidation (NQ)	61509	Neurofilament light polypeptide OS=Mus musculus OX=10090 GN=Nefl PE=1 SV=5
499	1461	P84078|ARF1_MOUSE	153.45	38	38	2186.4	6	5	15	Oxidation (M); Deamidation (NQ)	20697	ADP-ribosylation factor 1 OS=Mus musculus OX=10090 GN=Arf1 PE=1 SV=2
499	1460	P61205|ARF3_MOUSE	153.45	38	38	2186.4	6	5	15	Oxidation (M); Deamidation (NQ)	20601	ADP-ribosylation factor 3 OS=Mus musculus OX=10090 GN=Arf3 PE=2 SV=2
535	149	E9QAT4|SC16A_MOUSE	153.4	5	5	1394.1	8	8	13		254200	Protein transport protein Sec16A OS=Mus musculus OX=10090 GN=Sec16a PE=1 SV=1
761	1404	P23249|MOV10_MOUSE	153.35	6	6	2618.1	5	5	7		113583	Putative helicase MOV-10 OS=Mus musculus OX=10090 GN=Mov10 PE=1 SV=2
646	197	P61222|ABCE1_MOUSE	153.23	13	13	3950.1	7	7	10		67314	ATP-binding cassette sub-family E member 1 OS=Mus musculus OX=10090 GN=Abce1 PE=1 SV=1
769	514	Q8VEJ4|NLE1_MOUSE	153.02	12	12	5113.5	4	4	7	Acetylation (Protein N-term)	53134	Notchless protein homolog 1 OS=Mus musculus OX=10090 GN=Nle1 PE=1 SV=4
639	1426	P23242|CXA1_MOUSE	152.77	16	16	2195.8	4	4	10	Carbamidomethylation; Oxidation (M)	43004	Gap junction alpha-1 protein OS=Mus musculus OX=10090 GN=Gja1 PE=1 SV=2
766	521	Q91W39|NCOA5_MOUSE	152.75	9	9	4344.3	5	5	7	Oxidation (M)	65319	Nuclear receptor coactivator 5 OS=Mus musculus OX=10090 GN=Ncoa5 PE=1 SV=1
716	532	Q8BY02|NKRF_MOUSE	152.55	10	10	3851.8	6	6	8		77739	NF-kappa-B-repressing factor OS=Mus musculus OX=10090 GN=Nkrf PE=2 SV=3
837	501	Q8K2H1|PPHLN_MOUSE	152.24	13	13	2053.2	4	4	6	Carbamidomethylation; Oxidation (M)	43835	Periphilin-1 OS=Mus musculus OX=10090 GN=Pphln1 PE=1 SV=1
836	678	Q61687|ATRX_MOUSE	152.18	4	4	1089.4	6	6	6	Carbamidomethylation	278585	Transcriptional regulator ATRX OS=Mus musculus OX=10090 GN=Atrx PE=1 SV=3
813	1384	Q9D7S7|RL22L_MOUSE	152.15	32	32	12656	3	3	7		14467	60S ribosomal protein L22-like 1 OS=Mus musculus OX=10090 GN=Rpl22l1 PE=1 SV=1
710	983	Q7TPM1|PRC2B_MOUSE	152.12	7	7	1021.5	6	6	8	Oxidation (M)	160913	Protein PRRC2B OS=Mus musculus OX=10090 GN=Prrc2b PE=1 SV=1
628	1388	Q3URQ0|TEX10_MOUSE	151.85	7	7	2094.1	5	5	10		105209	Testis-expressed protein 10 OS=Mus musculus OX=10090 GN=Tex10 PE=1 SV=1
670	464	Q3U821|WDR75_MOUSE	151.67	7	7	2243.4	6	6	9	Carbamidomethylation; Oxidation (M)	94037	WD repeat-containing protein 75 OS=Mus musculus OX=10090 GN=Wdr75 PE=1 SV=1
681	3715	Q9JHI7|EXOS9_MOUSE	151.44	11	11	3440.9	4	4	9	Carbamidomethylation; Oxidation (M)	48937	Exosome complex component RRP45 OS=Mus musculus OX=10090 GN=Exosc9 PE=1 SV=1
824	1484	P67871|CSK2B_MOUSE	151.17	20	20	19311	4	4	7	Carbamidomethylation	24942	Casein kinase II subunit beta OS=Mus musculus OX=10090 GN=Csnk2b PE=1 SV=1
759	2370	Q6A065|CE170_MOUSE	151.11	4	4	1420.6	5	4	7	Carbamidomethylation; Deamidation (NQ)	175049	Centrosomal protein of 170 kDa OS=Mus musculus OX=10090 GN=Cep170 PE=1 SV=2
796	1645	Q60973|RBBP7_MOUSE	150.88	9	9	2414.8	4	3	7	Oxidation (M); Acetylation (Protein N-term)	47790	Histone-binding protein RBBP7 OS=Mus musculus OX=10090 GN=Rbbp7 PE=1 SV=1
601	476	Q8CGC6|RBM28_MOUSE	150.78	8	8	4747.6	5	5	11	Carbamidomethylation	84214	RNA-binding protein 28 OS=Mus musculus OX=10090 GN=Rbm28 PE=1 SV=4
732	452	Q60930|VDAC2_MOUSE	150.76	22	22	4134	6	6	8	Carbamidomethylation	31733	Voltage-dependent anion-selective channel protein 2 OS=Mus musculus OX=10090 GN=Vdac2 PE=1 SV=2
585	930	Q8CIL4|CA131_MOUSE	150.65	19	19	3970.2	4	4	12		31344	Uncharacterized protein C1orf131 homolog OS=Mus musculus OX=10090 PE=1 SV=1
864	230	Q68FH0|PKP4_MOUSE	150.48	5	5	2279.8	5	5	6	Carbamidomethylation; Deamidation (NQ)	131551	Plakophilin-4 OS=Mus musculus OX=10090 GN=Pkp4 PE=1 SV=1
821	16815	Q6PAL7|AHDC1_MOUSE	150.47	5	5	186.17	4	4	7		168080	AT-hook DNA-binding motif-containing protein 1 OS=Mus musculus OX=10090 GN=Ahdc1 PE=1 SV=1
495	473	Q922Q8|LRC59_MOUSE	150.3	26	26	17684	6	6	15	Carbamidomethylation; Deamidation (NQ)	34877	Leucine-rich repeat-containing protein 59 OS=Mus musculus OX=10090 GN=Lrrc59 PE=1 SV=1
697	1120	Q9R059|FHL3_MOUSE	150.21	23	23	3625.9	5	5	9	Carbamidomethylation	31795	Four and a half LIM domains protein 3 OS=Mus musculus OX=10090 GN=Fhl3 PE=1 SV=2
542	699	Q14AX6|CDK12_MOUSE	150.17	5	5	655.85	4	4	13		163680	Cyclin-dependent kinase 12 OS=Mus musculus OX=10090 GN=Cdk12 PE=1 SV=2
437	1598	P62082|RS7_MOUSE	149.94	23	23	52875	5	5	17		22127	40S ribosomal protein S7 OS=Mus musculus OX=10090 GN=Rps7 PE=2 SV=1
879	362	Q9Z1D1|EIF3G_MOUSE	149.42	17	17	2243.7	4	4	6	Carbamidomethylation; Oxidation (M)	35638	Eukaryotic translation initiation factor 3 subunit G OS=Mus musculus OX=10090 GN=Eif3g PE=1 SV=2
555	1259	Q9Z2Q5|RM40_MOUSE	149.38	25	25	8075.3	5	5	13	Deamidation (NQ)	24301	39S ribosomal protein L40 mitochondrial OS=Mus musculus OX=10090 GN=Mrpl40 PE=1 SV=2
648	1555	P70698|PYRG1_MOUSE	149.36	13	13	1556.6	6	6	10	Carbamidomethylation	66683	CTP synthase 1 OS=Mus musculus OX=10090 GN=Ctps1 PE=1 SV=2
554	7435	P23927|CRYAB_MOUSE	149.24	30	30	3107.6	5	5	13		20069	Alpha-crystallin B chain OS=Mus musculus OX=10090 GN=Cryab PE=1 SV=2
865	558	P35293|RAB18_MOUSE	149.23	30	30	2226.1	5	5	6	Carbamidomethylation; Acetylation (Protein N-term)	23035	Ras-related protein Rab-18 OS=Mus musculus OX=10090 GN=Rab18 PE=1 SV=2
948	12397	Q9EQ28|DPOD3_MOUSE	148.94	11	11	864.95	4	4	5	Carbamidomethylation	50836	DNA polymerase delta subunit 3 OS=Mus musculus OX=10090 GN=Pold3 PE=1 SV=2
722	816	Q9WV32|ARC1B_MOUSE	148.85	12	12	6279.2	3	3	8	Deamidation (NQ)	41064	Actin-related protein 2/3 complex subunit 1B OS=Mus musculus OX=10090 GN=Arpc1b PE=1 SV=4
914	3735	Q9R190|MTA2_MOUSE	148.85	9	9	3992.6	5	5	5		75030	Metastasis-associated protein MTA2 OS=Mus musculus OX=10090 GN=Mta2 PE=1 SV=1
891	1244	P97801|SMN_MOUSE	148.8	17	17	1100	3	3	6	Carbamidomethylation; Oxidation (M); Acetylation (Protein N-term)	31254	Survival motor neuron protein OS=Mus musculus OX=10090 GN=Smn1 PE=1 SV=1
651	1482	Q9CQS2|NOP10_MOUSE	148.62	62	62	8126.2	4	4	10	Carbamidomethylation; Oxidation (M)	7706	H/ACA ribonucleoprotein complex subunit 3 OS=Mus musculus OX=10090 GN=Nop10 PE=3 SV=1
1034	6263	O55187|CBX4_MOUSE	148.51	10	10	2441.8	4	4	4	Carbamidomethylation	60523	E3 SUMO-protein ligase CBX4 OS=Mus musculus OX=10090 GN=Cbx4 PE=1 SV=2
878	1610	Q9EPA7|NMNA1_MOUSE	148.49	21	21	3208.3	4	4	6	Carbamidomethylation	32355	Nicotinamide/nicotinic acid mononucleotide adenylyltransferase 1 OS=Mus musculus OX=10090 GN=Nmnat1 PE=1 SV=2
1100	7595	Q9JIF0|ANM1_MOUSE	148.11	15	15	896.91	4	4	4	Carbamidomethylation; Oxidation (M)	42436	Protein arginine N-methyltransferase 1 OS=Mus musculus OX=10090 GN=Prmt1 PE=1 SV=1
596	1075	P97384|ANX11_MOUSE	148.09	11	11	17669	5	5	11	Deamidation (NQ)	54079	Annexin A11 OS=Mus musculus OX=10090 GN=Anxa11 PE=1 SV=2
354	343	Q6NXH9|K2C73_MOUSE	148.06	6	6	2566.1	4	1	21	Carbamidomethylation; Deamidation (NQ)	58911	Keratin type II cytoskeletal 73 OS=Mus musculus OX=10090 GN=Krt73 PE=1 SV=1
876	7503	Q8JZX4|SPF45_MOUSE	148.04	18	18	1565.7	5	5	6	Acetylation (Protein N-term)	45304	Splicing factor 45 OS=Mus musculus OX=10090 GN=Rbm17 PE=1 SV=1
926	2523	Q6PG16|HJURP_MOUSE	148.03	8	8	1438.5	4	4	5		74199	Holliday junction recognition protein OS=Mus musculus OX=10090 GN=Hjurp PE=1 SV=1
809	287	P52293|IMA1_MOUSE	147.87	11	11	976.65	4	4	7	Acetylation (Protein N-term)	57928	Importin subunit alpha-1 OS=Mus musculus OX=10090 GN=Kpna2 PE=1 SV=2
963	17527	Q3TZX8|NOL9_MOUSE	147.83	4	4	4100.4	3	3	5	Carbamidomethylation; Acetylation (Protein N-term)	80840	Polynucleotide 5'-hydroxyl-kinase NOL9 OS=Mus musculus OX=10090 GN=Nol9 PE=1 SV=1
690	274	Q8CI61|BAG4_MOUSE	147.73	10	10	5480.5	3	3	9		49095	BAG family molecular chaperone regulator 4 OS=Mus musculus OX=10090 GN=Bag4 PE=1 SV=2
869	1067	Q9CR62|M2OM_MOUSE	147.65	12	12	2816.9	3	3	6		34155	Mitochondrial 2-oxoglutarate/malate carrier protein OS=Mus musculus OX=10090 GN=Slc25a11 PE=1 SV=3
721	598	Q91V61|SFXN3_MOUSE	147.28	18	18	1141.2	4	4	8	Acetylation (Protein N-term)	35406	Sideroflexin-3 OS=Mus musculus OX=10090 GN=Sfxn3 PE=1 SV=1
718	1002	Q61699|HS105_MOUSE	147.28	7	7	865.75	5	4	8	Carbamidomethylation; Oxidation (M)	96407	Heat shock protein 105 kDa OS=Mus musculus OX=10090 GN=Hsph1 PE=1 SV=2
602	359	Q69Z99|ZN512_MOUSE	147.14	15	15	3292.8	6	6	11	Carbamidomethylation	63908	Zinc finger protein 512 OS=Mus musculus OX=10090 GN=Znf512 PE=2 SV=2
699	1745	P97473|TRBP2_MOUSE	147.12	16	16	1653.4	4	4	9	Carbamidomethylation	38842	RISC-loading complex subunit TARBP2 OS=Mus musculus OX=10090 GN=Tarbp2 PE=1 SV=2
863	1724	Q4VBE8|WDR18_MOUSE	147.03	13	13	4507.3	5	5	6	Deamidation (NQ)	47211	WD repeat-containing protein 18 OS=Mus musculus OX=10090 GN=Wdr18 PE=1 SV=1
611	17341	Q9D7Z3|NOL7_MOUSE	146.32	22	22	6464.2	4	4	11		28970	Nucleolar protein 7 OS=Mus musculus OX=10090 GN=Nol7 PE=1 SV=1
845	1134	Q61771|KIF3B_MOUSE	146.25	9	9	1105	5	5	6		85288	Kinesin-like protein KIF3B OS=Mus musculus OX=10090 GN=Kif3b PE=1 SV=1
886	1643	P62869|ELOB_MOUSE	146.09	33	33	4328.4	5	5	6	Oxidation (M); Acetylation (Protein N-term)	13170	Elongin-B OS=Mus musculus OX=10090 GN=Elob PE=1 SV=1
1170	863	Q08369|GATA4_MOUSE	145.95	12	12	1327.4	3	3	3	Carbamidomethylation	44580	Transcription factor GATA-4 OS=Mus musculus OX=10090 GN=Gata4 PE=1 SV=4
362	1534	Q9JJI8|RL38_MOUSE	145.91	34	34	32185	4	4	21		8204	60S ribosomal protein L38 OS=Mus musculus OX=10090 GN=Rpl38 PE=1 SV=3
1102	9417	Q91ZS8|RED1_MOUSE	145.72	7	7	495.7	3	3	4	Deamidation (NQ)	78001	Double-stranded RNA-specific editase 1 OS=Mus musculus OX=10090 GN=Adarb1 PE=1 SV=1
463	938	Q3U1G5|I20L2_MOUSE	145.58	30	30	846.78	7	7	16	Carbamidomethylation; Oxidation (M); Acetylation (Protein N-term)	41020	Interferon-stimulated 20 kDa exonuclease-like 2 OS=Mus musculus OX=10090 GN=Isg20l2 PE=1 SV=2
434	1660	Q80VD1|FA98B_MOUSE	145.46	16	16	3980.2	5	3	17	Carbamidomethylation; Oxidation (M); Deamidation (NQ)	45349	Protein FAM98B OS=Mus musculus OX=10090 GN=Fam98b PE=1 SV=1
620	820	Q9D937|CK098_MOUSE	145.45	24	24	17002	3	3	10	Oxidation (M); Deamidation (NQ)	14099	Uncharacterized protein C11orf98 homolog OS=Mus musculus OX=10090 PE=1 SV=1
841	990	Q8VHR5|P66B_MOUSE	145.19	11	11	1025.2	4	4	6	Carbamidomethylation	65411	Transcriptional repressor p66-beta OS=Mus musculus OX=10090 GN=Gatad2b PE=1 SV=1
868	272	Q8BI72|CARF_MOUSE	145.1	9	9	2075.7	3	3	6	Carbamidomethylation; Acetylation (Protein N-term)	59745	CDKN2A-interacting protein OS=Mus musculus OX=10090 GN=Cdkn2aip PE=1 SV=1
975	817	Q60793|KLF4_MOUSE	145.09	16	16	3866.2	5	5	5	Carbamidomethylation	51880	Krueppel-like factor 4 OS=Mus musculus OX=10090 GN=Klf4 PE=1 SV=3
881	1520	Q9DCT6|BAP18_MOUSE	144.87	23	23	2154.3	3	3	6	Oxidation (M)	17996	Chromatin complexes subunit BAP18 OS=Mus musculus OX=10090 GN=Bap18 PE=1 SV=1
782	7468	Q99JX4|EIF3M_MOUSE	144.86	15	15	914.69	4	4	7	Carbamidomethylation; Oxidation (M); Acetylation (Protein N-term)	42517	Eukaryotic translation initiation factor 3 subunit M OS=Mus musculus OX=10090 GN=Eif3m PE=1 SV=1
719	9404	P98078|DAB2_MOUSE	144.83	9	9	2022.7	5	5	8	Acetylation (Protein N-term); Deamidation (NQ)	82312	Disabled homolog 2 OS=Mus musculus OX=10090 GN=Dab2 PE=1 SV=2
551	310	Q9DB42|ZN593_MOUSE	144.8	40	40	11307	4	4	13	Oxidation (M); Deamidation (NQ)	15147	Zinc finger protein 593 OS=Mus musculus OX=10090 GN=Znf593 PE=1 SV=2
659	180	Q921U8|SMTN_MOUSE	144.58	6	6	1608.1	5	5	9	Acetylation (Protein N-term)	100289	Smoothelin OS=Mus musculus OX=10090 GN=Smtn PE=1 SV=2
668	704	Q91VC3|IF4A3_MOUSE	144.57	13	13	5847.1	5	4	9	Oxidation (M); Acetylation (Protein N-term)	46840	Eukaryotic initiation factor 4A-III OS=Mus musculus OX=10090 GN=Eif4a3 PE=1 SV=3
866	423	Q3UFY8|TM10C_MOUSE	144.45	14	14	7363.2	4	4	6		48386	tRNA methyltransferase 10 homolog C OS=Mus musculus OX=10090 GN=Trmt10c PE=1 SV=2
857	857	P28033|CEBPB_MOUSE	144.31	14	14	2269.1	3	3	6	Carbamidomethylation	31446	CCAAT/enhancer-binding protein beta OS=Mus musculus OX=10090 GN=Cebpb PE=1 SV=1
932	2381	Q8BH74|NU107_MOUSE	144.14	4	4	867.79	3	3	5		106717	Nuclear pore complex protein Nup107 OS=Mus musculus OX=10090 GN=Nup107 PE=1 SV=1
654	574	Q64331|MYO6_MOUSE	144.12	5	5	3892.7	5	5	9	Oxidation (M); Deamidation (NQ)	146409	Unconventional myosin-VI OS=Mus musculus OX=10090 GN=Myo6 PE=1 SV=1
814	912	P53986|MOT1_MOUSE	144.11	10	10	2260.7	3	3	7		53267	Monocarboxylate transporter 1 OS=Mus musculus OX=10090 GN=Slc16a1 PE=1 SV=1
980	481	Q8VI84|NOC3L_MOUSE	144.04	5	5	2982.9	4	4	5	Carbamidomethylation	93211	Nucleolar complex protein 3 homolog OS=Mus musculus OX=10090 GN=Noc3l PE=2 SV=2
850	460	P08249|MDHM_MOUSE	143.85	20	20	1988.9	5	5	6	Carbamidomethylation	35611	Malate dehydrogenase mitochondrial OS=Mus musculus OX=10090 GN=Mdh2 PE=1 SV=3
737	934	Q99LB0|TDIF1_MOUSE	143.55	14	14	2312.7	3	3	8	Carbamidomethylation; Deamidation (NQ)	36852	Deoxynucleotidyltransferase terminal-interacting protein 1 OS=Mus musculus OX=10090 GN=Dnttip1 PE=1 SV=1
852	7470	Q8C0T5|SI1L1_MOUSE	143.37	3	3	421.15	4	4	6	Carbamidomethylation	197030	Signal-induced proliferation-associated 1-like protein 1 OS=Mus musculus OX=10090 GN=Sipa1l1 PE=1 SV=2
677	324	P80314|TCPB_MOUSE	143.33	12	12	875.97	5	5	9	Oxidation (M); Acetylation (Protein N-term)	57477	T-complex protein 1 subunit beta OS=Mus musculus OX=10090 GN=Cct2 PE=1 SV=4
974	1635	Q91W18|TDRD3_MOUSE	143.2	8	8	21237	5	5	5		82253	Tudor domain-containing protein 3 OS=Mus musculus OX=10090 GN=Tdrd3 PE=1 SV=4
698	929	P62874|GBB1_MOUSE	142.98	19	19	1324.2	5	3	9	Carbamidomethylation	37377	Guanine nucleotide-binding protein G(I)/G(S)/G(T) subunit beta-1 OS=Mus musculus OX=10090 GN=Gnb1 PE=1 SV=3
775	11199	Q6NZF1|ZC11A_MOUSE	142.84	10	10	1101.8	6	6	7		86492	Zinc finger CCCH domain-containing protein 11A OS=Mus musculus OX=10090 GN=Zc3h11a PE=1 SV=1
638	1472	Q60855|RIPK1_MOUSE	142.83	8	8	2161.3	5	5	10	Carbamidomethylation; Acetylation (Protein N-term); Deamidation (NQ)	74854	Receptor-interacting serine/threonine-protein kinase 1 OS=Mus musculus OX=10090 GN=Ripk1 PE=1 SV=1
806	380	Q9QWT9|KIFC1_MOUSE	142.57	9	9	1925	5	5	7	Carbamidomethylation	74153	Kinesin-like protein KIFC1 OS=Mus musculus OX=10090 GN=Kifc1 PE=1 SV=2
451	626	Q8VED5|K2C79_MOUSE	142.55	4	4	17469	4	1	16		57552	Keratin type II cytoskeletal 79 OS=Mus musculus OX=10090 GN=Krt79 PE=1 SV=2
744	822	O35368|IFI3_MOUSE	142.55	13	13	1839	4	3	8	Oxidation (M); Deamidation (NQ)	46300	Interferon-activable protein 203 OS=Mus musculus OX=10090 GN=Ifi203 PE=1 SV=1
848	16862	Q810V0|MPP10_MOUSE	142.51	7	7	1828.8	4	4	6		78735	U3 small nucleolar ribonucleoprotein protein MPP10 OS=Mus musculus OX=10090 GN=Mphosph10 PE=1 SV=2
709	5743	Q9JLV1|BAG3_MOUSE	142.4	12	12	2215.7	4	4	8	Carbamidomethylation	61860	BAG family molecular chaperone regulator 3 OS=Mus musculus OX=10090 GN=Bag3 PE=1 SV=2
667	5918	Q60520|SIN3A_MOUSE	142.31	5	5	783.35	5	5	9		145088	Paired amphipathic helix protein Sin3a OS=Mus musculus OX=10090 GN=Sin3a PE=1 SV=3
853	1253	Q8CGU1|CACO1_MOUSE	142.19	8	8	10334	4	4	6	Carbamidomethylation; Deamidation (NQ)	77280	Calcium-binding and coiled-coil domain-containing protein 1 OS=Mus musculus OX=10090 GN=Calcoco1 PE=1 SV=2
286	1585	P62245|RS15A_MOUSE	141.97	28	28	159000	4	4	28	Carbamidomethylation; Oxidation (M); Acetylation (Protein N-term); Deamidation (NQ)	14840	40S ribosomal protein S15a OS=Mus musculus OX=10090 GN=Rps15a PE=1 SV=2
733	1540	P70168|IMB1_MOUSE	141.86	5	5	1941.9	4	4	8	Oxidation (M); Acetylation (Protein N-term)	97184	Importin subunit beta-1 OS=Mus musculus OX=10090 GN=Kpnb1 PE=1 SV=2
712	826	P09411|PGK1_MOUSE	141.83	18	18	352.8	5	5	8	Carbamidomethylation; Oxidation (M)	44550	Phosphoglycerate kinase 1 OS=Mus musculus OX=10090 GN=Pgk1 PE=1 SV=4
847	16751	P57784|RU2A_MOUSE	141.79	19	19	4241.5	4	4	6		28357	U2 small nuclear ribonucleoprotein A' OS=Mus musculus OX=10090 GN=Snrpa1 PE=1 SV=2
777	7995	Q569Z6|TR150_MOUSE	141.64	9	9	2915.4	5	5	7	Oxidation (M)	108178	Thyroid hormone receptor-associated protein 3 OS=Mus musculus OX=10090 GN=Thrap3 PE=1 SV=1
957	491	Q61553|FSCN1_MOUSE	141.62	7	7	1266.7	3	3	5	Carbamidomethylation	54508	Fascin OS=Mus musculus OX=10090 GN=Fscn1 PE=1 SV=4
805	538	Q9EP97|SENP3_MOUSE	141.58	12	12	5415.9	5	5	7	Carbamidomethylation	64403	Sentrin-specific protease 3 OS=Mus musculus OX=10090 GN=Senp3 PE=1 SV=1
762	775	Q3UZ39|LRRF1_MOUSE	141.53	10	10	409.84	4	3	7	Carbamidomethylation; Oxidation (M)	79249	Leucine-rich repeat flightless-interacting protein 1 OS=Mus musculus OX=10090 GN=Lrrfip1 PE=1 SV=2
780	890	P61965|WDR5_MOUSE	141.43	16	16	27128	4	4	7	Carbamidomethylation; Deamidation (NQ)	36589	WD repeat-containing protein 5 OS=Mus musculus OX=10090 GN=Wdr5 PE=1 SV=1
981	1485	P70288|HDAC2_MOUSE	141.29	8	8	564.9	4	1	5		55302	Histone deacetylase 2 OS=Mus musculus OX=10090 GN=Hdac2 PE=1 SV=1
949	265	Q9Z1Q5|CLIC1_MOUSE	141.24	21	21	4073.7	4	4	5	Carbamidomethylation; Acetylation (Protein N-term)	27013	Chloride intracellular channel protein 1 OS=Mus musculus OX=10090 GN=Clic1 PE=1 SV=3
237	1586	P62855|RS26_MOUSE	141.21	34	34	139700	3	3	34	Oxidation (M)	13015	40S ribosomal protein S26 OS=Mus musculus OX=10090 GN=Rps26 PE=1 SV=3
815	3932	Q7TPD0|INT3_MOUSE	141.17	4	4	508.85	3	3	7	Carbamidomethylation	117938	Integrator complex subunit 3 OS=Mus musculus OX=10090 GN=Ints3 PE=1 SV=2
905	646	Q64518|AT2A3_MOUSE	141.01	6	6	28.575	4	1	5	Carbamidomethylation; Acetylation (Protein N-term); Deamidation (NQ)	113638	Sarcoplasmic/endoplasmic reticulum calcium ATPase 3 OS=Mus musculus OX=10090 GN=Atp2a3 PE=1 SV=3
888	958	Q8BU14|SEC62_MOUSE	141	10	10	4135.9	5	5	6	Carbamidomethylation	45581	Translocation protein SEC62 OS=Mus musculus OX=10090 GN=Sec62 PE=1 SV=1
763	964	Q62376|RU17_MOUSE	140.56	11	11	6245.6	4	4	7	Deamidation (NQ)	51992	U1 small nuclear ribonucleoprotein 70 kDa OS=Mus musculus OX=10090 GN=Snrnp70 PE=1 SV=2
947	1111	P80316|TCPE_MOUSE	140.55	9	9	1937.5	4	4	5	Carbamidomethylation	59624	T-complex protein 1 subunit epsilon OS=Mus musculus OX=10090 GN=Cct5 PE=1 SV=1
717	12354	Q4VA53|PDS5B_MOUSE	140.53	5	5	876.94	4	4	8		164418	Sister chromatid cohesion protein PDS5 homolog B OS=Mus musculus OX=10090 GN=Pds5b PE=1 SV=1
595	510	P25206|MCM3_MOUSE	140.2	12	12	6819.9	7	7	11	Acetylation (Protein N-term)	91546	DNA replication licensing factor MCM3 OS=Mus musculus OX=10090 GN=Mcm3 PE=1 SV=2
707	619	Q4QY64|ATAD5_MOUSE	140.18	4	4	275.84	4	4	8	Carbamidomethylation	203907	ATPase family AAA domain-containing protein 5 OS=Mus musculus OX=10090 GN=Atad5 PE=1 SV=1
573	479	P05064|ALDOA_MOUSE	140.14	18	18	2034.3	4	4	12		39356	Fructose-bisphosphate aldolase A OS=Mus musculus OX=10090 GN=Aldoa PE=1 SV=2
1079	7608	P30681|HMGB2_MOUSE	140.11	15	15	687.87	3	1	4	Carbamidomethylation; Oxidation (M)	24162	High mobility group protein B2 OS=Mus musculus OX=10090 GN=Hmgb2 PE=1 SV=3
804	9608	Q6P2L6|NSD3_MOUSE	139.95	7	7	931.31	6	6	7		161002	Histone-lysine N-methyltransferase NSD3 OS=Mus musculus OX=10090 GN=Nsd3 PE=1 SV=2
858	1429	Q6PGL7|WASC2_MOUSE	139.93	3	3	1232.5	3	3	6	Deamidation (NQ)	145310	WASH complex subunit 2 OS=Mus musculus OX=10090 GN=Washc2 PE=1 SV=1
672	1548	P08752|GNAI2_MOUSE	139.9	14	14	2178.5	4	3	9	Carbamidomethylation	40489	Guanine nucleotide-binding protein G(i) subunit alpha-2 OS=Mus musculus OX=10090 GN=Gnai2 PE=1 SV=5
1101	27814	P01872|IGHM_MOUSE	139.78	9	9	985.1	3	3	4	Carbamidomethylation	49972	Immunoglobulin heavy constant mu OS=Mus musculus OX=10090 GN=Ighm PE=1 SV=2
603	969	P35700|PRDX1_MOUSE	139.78	21	21	11650	4	3	11	Oxidation (M)	22176	Peroxiredoxin-1 OS=Mus musculus OX=10090 GN=Prdx1 PE=1 SV=1
599	7479	Q920B9|SP16H_MOUSE	139.67	8	8	1625	6	6	11	Acetylation (Protein N-term); Deamidation (NQ)	119825	FACT complex subunit SPT16 OS=Mus musculus OX=10090 GN=Supt16h PE=1 SV=2
783	444	Q9D1M0|SEC13_MOUSE	139.53	17	17	3018.1	4	4	7	Carbamidomethylation; Deamidation (NQ)	35566	Protein SEC13 homolog OS=Mus musculus OX=10090 GN=Sec13 PE=1 SV=3
694	456	P40630|TFAM_MOUSE	139.48	26	26	6152.1	6	6	9	Oxidation (M)	27988	Transcription factor A mitochondrial OS=Mus musculus OX=10090 GN=Tfam PE=1 SV=2
550	2225	P68510|1433F_MOUSE	139.4	19	19	1739.9	4	3	13	Oxidation (M)	28212	14-3-3 protein eta OS=Mus musculus OX=10090 GN=Ywhah PE=1 SV=2
650	439	Q9WUK4|RFC2_MOUSE	139.18	14	14	5481.5	4	4	10	Carbamidomethylation	38725	Replication factor C subunit 2 OS=Mus musculus OX=10090 GN=Rfc2 PE=1 SV=1
274	7581	P47955|RLA1_MOUSE	139.13	67	67	14797	3	3	30	Carbamidomethylation; Oxidation (M); Deamidation (NQ)	11475	60S acidic ribosomal protein P1 OS=Mus musculus OX=10090 GN=Rplp1 PE=1 SV=1
941	1029	Q91VD9|NDUS1_MOUSE	138.98	9	9	1235.5	5	5	5		79777	NADH-ubiquinone oxidoreductase 75 kDa subunit mitochondrial OS=Mus musculus OX=10090 GN=Ndufs1 PE=1 SV=2
702	818	P05627|JUN_MOUSE	138.78	13	13	4497.4	3	3	9	Oxidation (M); Deamidation (NQ)	35944	Transcription factor AP-1 OS=Mus musculus OX=10090 GN=Jun PE=1 SV=3
1099	667	Q0P678|ZCH18_MOUSE	138.77	7	7	1306.6	4	4	4		105694	Zinc finger CCCH domain-containing protein 18 OS=Mus musculus OX=10090 GN=Zc3h18 PE=1 SV=1
924	1569	P26443|DHE3_MOUSE	138.77	11	11	1830.8	5	5	5	Carbamidomethylation	61337	Glutamate dehydrogenase 1 mitochondrial OS=Mus musculus OX=10090 GN=Glud1 PE=1 SV=1
862	7104	Q9Z1M8|RED_MOUSE	138.7	10	10	640.47	4	4	6		65616	Protein Red OS=Mus musculus OX=10090 GN=Ik PE=1 SV=2
900	1043	Q9JJY4|DDX20_MOUSE	138.64	6	6	1423.6	3	3	5	Carbamidomethylation	91710	Probable ATP-dependent RNA helicase DDX20 OS=Mus musculus OX=10090 GN=Ddx20 PE=1 SV=2
487	1458	Q9CY21|BUD23_MOUSE	138.62	17	17	6916.7	3	3	15	Oxidation (M)	31587	Probable 18S rRNA (guanine-N(7))-methyltransferase OS=Mus musculus OX=10090 GN=Bud23 PE=1 SV=1
630	3243	P54276|MSH6_MOUSE	138.62	4	4	1579.2	4	4	10		151083	DNA mismatch repair protein Msh6 OS=Mus musculus OX=10090 GN=Msh6 PE=1 SV=3
581	921	P23198|CBX3_MOUSE	138.52	30	30	7375.2	4	4	12	Carbamidomethylation	20855	Chromobox protein homolog 3 OS=Mus musculus OX=10090 GN=Cbx3 PE=1 SV=2
604	7879	Q9CPP0|NPM3_MOUSE	138.51	30	30	17698	3	3	11	Carbamidomethylation; Acetylation (Protein N-term); Deamidation (NQ)	19023	Nucleoplasmin-3 OS=Mus musculus OX=10090 GN=Npm3 PE=1 SV=3
1017	5200	Q8R5C8|ZMY11_MOUSE	137.8	6	6	415.9	3	3	4	Carbamidomethylation	70838	Zinc finger MYND domain-containing protein 11 OS=Mus musculus OX=10090 GN=Zmynd11 PE=1 SV=2
1113	436	Q9CRB9|MIC19_MOUSE	137.77	12	12	4290.3	3	3	4	Deamidation (NQ)	26335	MICOS complex subunit Mic19 OS=Mus musculus OX=10090 GN=Chchd3 PE=1 SV=1
823	1664	P63094|GNAS2_MOUSE	137.65	13	13	1723.8	4	3	7		45664	Guanine nucleotide-binding protein G(s) subunit alpha isoforms short OS=Mus musculus OX=10090 GN=Gnas PE=1 SV=1
823	1248	Q6R0H7|GNAS1_MOUSE	137.65	4	4	1723.8	4	3	7		121505	Guanine nucleotide-binding protein G(s) subunit alpha isoforms XLas OS=Mus musculus OX=10090 GN=Gnas PE=1 SV=1
58	1443	P05977|MYL1_MOUSE	137.5	15	15	10158	3	1	138	Oxidation (M); Deamidation (NQ)	20594	Myosin light chain 1/3 skeletal muscle isoform OS=Mus musculus OX=10090 GN=Myl1 PE=1 SV=2
1009	158	Q91ZU6|DYST_MOUSE	137.35	1	1	739.67	3	3	4		834234	Dystonin OS=Mus musculus OX=10090 GN=Dst PE=1 SV=2
341	931	P17095|HMGA1_MOUSE	137.04	41	41	46763	4	4	22		11614	High mobility group protein HMG-I/HMG-Y OS=Mus musculus OX=10090 GN=Hmga1 PE=1 SV=4
913	973	Q3UFY0|RRP36_MOUSE	136.92	14	14	944.3	3	3	5		28589	Ribosomal RNA processing protein 36 homolog OS=Mus musculus OX=10090 GN=Rrp36 PE=1 SV=1
640	978	P24369|PPIB_MOUSE	136.92	17	17	7559.6	3	3	10	Deamidation (NQ)	23713	Peptidyl-prolyl cis-trans isomerase B OS=Mus musculus OX=10090 GN=Ppib PE=1 SV=2
807	1640	Q60862|ORC2_MOUSE	136.15	8	8	2006.1	4	4	7	Deamidation (NQ)	65894	Origin recognition complex subunit 2 OS=Mus musculus OX=10090 GN=Orc2 PE=1 SV=1
755	692	Q8BSY0|ASPH_MOUSE	136.02	7	7	1094.7	3	3	8		83042	Aspartyl/asparaginyl beta-hydroxylase OS=Mus musculus OX=10090 GN=Asph PE=1 SV=1
976	316	Q8BJH1|ZC21A_MOUSE	135.82	17	17	4795.2	4	4	5		35152	Zinc finger C2HC domain-containing protein 1A OS=Mus musculus OX=10090 GN=Zc2hc1a PE=1 SV=1
950	1383	Q7TN98|CPEB4_MOUSE	135.81	8	8	815.96	4	4	5	Carbamidomethylation; Acetylation (Protein N-term)	80122	Cytoplasmic polyadenylation element-binding protein 4 OS=Mus musculus OX=10090 GN=Cpeb4 PE=1 SV=1
268	1176	Q6ZWU9|RS27_MOUSE	135.56	30	30	9229.1	3	2	30	Oxidation (M); Deamidation (NQ)	9461	40S ribosomal protein S27 OS=Mus musculus OX=10090 GN=Rps27 PE=1 SV=3
1012	27811	P60898|RPB9_MOUSE	135.54	34	34	366.54	3	3	4	Carbamidomethylation; Acetylation (Protein N-term)	14523	DNA-directed RNA polymerase II subunit RPB9 OS=Mus musculus OX=10090 GN=Polr2i PE=1 SV=1
793	895	Q9D883|U2AF1_MOUSE	135.5	18	18	5109.7	4	4	7	Carbamidomethylation; Acetylation (Protein N-term)	27815	Splicing factor U2AF 35 kDa subunit OS=Mus musculus OX=10090 GN=U2af1 PE=1 SV=4
743	513	Q6P3Y5|Z280C_MOUSE	135.4	11	11	3142.5	5	5	8	Carbamidomethylation	83146	Zinc finger protein 280C OS=Mus musculus OX=10090 GN=Znf280c PE=1 SV=1
911	554	P14211|CALR_MOUSE	135.1	13	13	5314.5	4	4	5		47995	Calreticulin OS=Mus musculus OX=10090 GN=Calr PE=1 SV=1
958	1381	Q61466|SMRD1_MOUSE	134.97	8	8	1579.5	3	3	5		58245	SWI/SNF-related matrix-associated actin-dependent regulator of chromatin subfamily D member 1 OS=Mus musculus OX=10090 GN=Smarcd1 PE=1 SV=3
904	6292	Q9QYH6|MAGD1_MOUSE	134.96	6	6	222.4	3	3	5		85670	Melanoma-associated antigen D1 OS=Mus musculus OX=10090 GN=Maged1 PE=1 SV=1
903	1647	Q61316|HSP74_MOUSE	134.82	5	5	425.76	3	2	5	Carbamidomethylation	94133	Heat shock 70 kDa protein 4 OS=Mus musculus OX=10090 GN=Hspa4 PE=1 SV=1
701	7444	Q7TN29|SMAP2_MOUSE	134.63	12	12	3659.2	5	5	9	Oxidation (M)	46578	Stromal membrane-associated protein 2 OS=Mus musculus OX=10090 GN=Smap2 PE=1 SV=1
915	559	Q8CGB6|TNS2_MOUSE	134.59	4	4	1280.6	4	4	5	Oxidation (M)	152012	Tensin-2 OS=Mus musculus OX=10090 GN=Tns2 PE=1 SV=1
867	875	Q99J62|RFC4_MOUSE	134.55	14	14	5156.9	4	4	6		39867	Replication factor C subunit 4 OS=Mus musculus OX=10090 GN=Rfc4 PE=1 SV=1
684	1373	Q9CYR0|SSBP_MOUSE	134.42	24	24	5833.6	3	3	9	Oxidation (M)	17319	Single-stranded DNA-binding protein mitochondrial OS=Mus musculus OX=10090 GN=Ssbp1 PE=1 SV=1
534	815	Q9DCT8|CRIP2_MOUSE	134.35	34	34	10571	3	3	13	Carbamidomethylation; Oxidation (M); Deamidation (NQ)	22727	Cysteine-rich protein 2 OS=Mus musculus OX=10090 GN=Crip2 PE=1 SV=1
1076	1403	Q9EQH3|VPS35_MOUSE	134.13	5	5	1161.1	3	3	4		91713	Vacuolar protein sorting-associated protein 35 OS=Mus musculus OX=10090 GN=Vps35 PE=1 SV=1
1014	1677	Q03141|MARK3_MOUSE	133.73	6	6	592.81	3	3	4		84390	MAP/microtubule affinity-regulating kinase 3 OS=Mus musculus OX=10090 GN=Mark3 PE=1 SV=2
790	16710	O70318|E41L2_MOUSE	133.59	5	5	1123.3	4	4	7	Acetylation (Protein N-term)	109940	Band 4.1-like protein 2 OS=Mus musculus OX=10090 GN=Epb41l2 PE=1 SV=2
877	7491	P14824|ANXA6_MOUSE	133.46	7	7	603.68	4	4	6	Carbamidomethylation	75885	Annexin A6 OS=Mus musculus OX=10090 GN=Anxa6 PE=1 SV=3
618	908	Q9CZT6|CMS1_MOUSE	133.43	12	12	5242.8	3	3	11	Carbamidomethylation	31594	Protein CMSS1 OS=Mus musculus OX=10090 GN=Cmss1 PE=2 SV=1
942	388	Q8BHS3|RBM22_MOUSE	133.39	14	14	1761.9	5	5	5	Carbamidomethylation; Acetylation (Protein N-term)	46896	Pre-mRNA-splicing factor RBM22 OS=Mus musculus OX=10090 GN=Rbm22 PE=1 SV=1
892	7892	O08807|PRDX4_MOUSE	133.26	13	13	73.484	3	2	6		31053	Peroxiredoxin-4 OS=Mus musculus OX=10090 GN=Prdx4 PE=1 SV=1
746	831	P80315|TCPD_MOUSE	133.1	8	8	1960.3	3	3	8	Oxidation (M)	58066	T-complex protein 1 subunit delta OS=Mus musculus OX=10090 GN=Cct4 PE=1 SV=3
411	527	Q9QXS6|DREB_MOUSE	132.83	11	11	6851.9	4	4	18	Deamidation (NQ)	77287	Drebrin OS=Mus musculus OX=10090 GN=Dbn1 PE=1 SV=4
1075	1453	D0QMC3|MNDAL_MOUSE	132.81	8	8	467.27	3	2	4		60526	Myeloid cell nuclear differentiation antigen-like protein OS=Mus musculus OX=10090 GN=Mndal PE=1 SV=1
795	16717	Q5RJG1|NOL10_MOUSE	132.66	5	5	644.53	3	3	7	Acetylation (Protein N-term)	80077	Nucleolar protein 10 OS=Mus musculus OX=10090 GN=Nol10 PE=2 SV=1
934	847	Q922G2|FA76A_MOUSE	132.12	12	12	1351.8	3	3	5		35095	Protein FAM76A OS=Mus musculus OX=10090 GN=Fam76a PE=2 SV=1
854	486	Q8BFW7|LPP_MOUSE	131.91	10	10	2087.8	3	3	6	Deamidation (NQ)	65891	Lipoma-preferred partner homolog OS=Mus musculus OX=10090 GN=Lpp PE=1 SV=1
960	1447	Q5SSK3|TEFM_MOUSE	131.9	13	13	2323.9	3	3	5	Carbamidomethylation	41874	Transcription elongation factor mitochondrial OS=Mus musculus OX=10090 GN=Tefm PE=1 SV=1
1105	885	O08579|EMD_MOUSE	131.8	12	12	3642	3	3	4	Oxidation (M)	29436	Emerin OS=Mus musculus OX=10090 GN=Emd PE=1 SV=1
977	853	Q9D8B3|CHM4B_MOUSE	131.54	20	20	5785.6	4	4	5	Deamidation (NQ)	24936	Charged multivesicular body protein 4b OS=Mus musculus OX=10090 GN=Chmp4b PE=1 SV=2
689	291	Q80XP8|FA76B_MOUSE	131.37	14	14	5167.9	4	4	9	Carbamidomethylation; Acetylation (Protein N-term)	38556	Protein FAM76B OS=Mus musculus OX=10090 GN=Fam76b PE=1 SV=1
700	1670	Q99N93|RM16_MOUSE	130.67	19	19	2880.7	4	4	9	Carbamidomethylation	28804	39S ribosomal protein L16 mitochondrial OS=Mus musculus OX=10090 GN=Mrpl16 PE=1 SV=1
671	7687	P51150|RAB7A_MOUSE	130.56	35	35	1451.3	6	6	9	Deamidation (NQ)	23490	Ras-related protein Rab-7a OS=Mus musculus OX=10090 GN=Rab7a PE=1 SV=2
828	702	Q9CZJ1|UTP11_MOUSE	130.53	13	13	2026.6	5	5	7	Carbamidomethylation	30551	Probable U3 small nucleolar RNA-associated protein 11 OS=Mus musculus OX=10090 GN=Utp11 PE=2 SV=1
999	1449	Q9WTX5|SKP1_MOUSE	130.36	13	13	2803.2	3	3	5	Carbamidomethylation	18672	S-phase kinase-associated protein 1 OS=Mus musculus OX=10090 GN=Skp1 PE=1 SV=3
1033	1780	O54931|AKAP2_MOUSE	130.28	6	6	1233.5	4	4	4	Carbamidomethylation	98579	A-kinase anchor protein 2 OS=Mus musculus OX=10090 GN=Akap2 PE=1 SV=3
1032	18405	Q9QYL7|ABT1_MOUSE	130.26	22	22	1372.6	4	4	4	Carbamidomethylation; Oxidation (M)	30659	Activator of basal transcription 1 OS=Mus musculus OX=10090 GN=Abt1 PE=2 SV=1
1039	553	O35129|PHB2_MOUSE	130.05	11	11	2075.5	3	3	4		33296	Prohibitin-2 OS=Mus musculus OX=10090 GN=Phb2 PE=1 SV=1
691	1697	Q8R105|VP37C_MOUSE	129.39	14	14	449.31	3	3	9		38453	Vacuolar protein sorting-associated protein 37C OS=Mus musculus OX=10090 GN=Vps37c PE=1 SV=1
516	1601	Q9CY66|GAR1_MOUSE	129.35	19	19	30473	4	4	14	Carbamidomethylation	23474	H/ACA ribonucleoprotein complex subunit 1 OS=Mus musculus OX=10090 GN=Gar1 PE=1 SV=1
720	1106	Q6ZPV2|INO80_MOUSE	129.14	3	3	1426.6	3	3	8	Carbamidomethylation	176519	Chromatin-remodeling ATPase INO80 OS=Mus musculus OX=10090 GN=Ino80 PE=1 SV=2
397	27834	Q64523|H2A2C_MOUSE	128.87	23	23	45262	2	2	19	Deamidation (NQ)	13988	Histone H2A type 2-C OS=Mus musculus OX=10090 GN=Hist2h2ac PE=1 SV=3
397	27835	Q6GSS7|H2A2A_MOUSE	128.87	23	23	45262	2	2	19	Deamidation (NQ)	14095	Histone H2A type 2-A OS=Mus musculus OX=10090 GN=Hist2h2aa1 PE=1 SV=3
1065	2029	O89090|SP1_MOUSE	128.74	8	8	715.63	3	3	4	Acetylation (Protein N-term); Deamidation (NQ)	80732	Transcription factor Sp1 OS=Mus musculus OX=10090 GN=Sp1 PE=1 SV=2
899	495	Q61595|KTN1_MOUSE	128.14	4	4	1316	4	4	5		152592	Kinectin OS=Mus musculus OX=10090 GN=Ktn1 PE=1 SV=1
784	2008	Q99KH8|STK24_MOUSE	127.79	10	10	741.96	3	3	7	Carbamidomethylation; Deamidation (NQ)	47954	Serine/threonine-protein kinase 24 OS=Mus musculus OX=10090 GN=Stk24 PE=1 SV=1
1143	5802	O88491|NSD1_MOUSE	127.74	2	2	374.12	3	3	3		284082	Histone-lysine N-methyltransferase H3 lysine-36 specific OS=Mus musculus OX=10090 GN=Nsd1 PE=1 SV=1
842	1755	Q921E6|EED_MOUSE	127.69	11	11	1185.6	4	4	6		50198	Polycomb protein EED OS=Mus musculus OX=10090 GN=Eed PE=1 SV=1
751	17299	Q9CQF3|CPSF5_MOUSE	127.32	30	30	3690.7	5	5	8		26240	Cleavage and polyadenylation specificity factor subunit 5 OS=Mus musculus OX=10090 GN=Nudt21 PE=1 SV=1
661	361	Q8K1N2|PHLB2_MOUSE	127.2	4	4	718.38	4	4	9	Carbamidomethylation; Deamidation (NQ)	141485	Pleckstrin homology-like domain family B member 2 OS=Mus musculus OX=10090 GN=Phldb2 PE=1 SV=2
896	1375	Q8BTW3|EXOS6_MOUSE	127.12	15	15	2504.7	2	2	6		28370	Exosome complex component MTR3 OS=Mus musculus OX=10090 GN=Exosc6 PE=1 SV=1
1013	1005	Q8R361|RFIP5_MOUSE	127.03	8	8	1453.3	3	3	4	Acetylation (Protein N-term)	69553	Rab11 family-interacting protein 5 OS=Mus musculus OX=10090 GN=Rab11fip5 PE=1 SV=2
871	841	Q9CX11|UTP23_MOUSE	126.89	14	14	4647.1	3	3	6	Carbamidomethylation; Oxidation (M)	28380	rRNA-processing protein UTP23 homolog OS=Mus musculus OX=10090 GN=Utp23 PE=2 SV=1
1248	1494	P01635|KV5A3_MOUSE	126.87	20	20	1132.6	2	2	3		12581	Ig kappa chain V-V region K2 (Fragment) OS=Mus musculus OX=10090 PE=1 SV=1
979	1629	Q9DAW6|PRP4_MOUSE	126.71	10	10	1450.3	4	4	5	Carbamidomethylation	58370	U4/U6 small nuclear ribonucleoprotein Prp4 OS=Mus musculus OX=10090 GN=Prpf4 PE=1 SV=1
715	1290	Q9JMB0|GKAP1_MOUSE	126.66	15	15	5187.1	4	4	8	Carbamidomethylation; Acetylation (Protein N-term); Deamidation (NQ)	41763	G kinase-anchoring protein 1 OS=Mus musculus OX=10090 GN=Gkap1 PE=1 SV=1
1061	7736	Q9JI10|STK3_MOUSE	126.6	8	8	330.89	3	3	4		56855	Serine/threonine-protein kinase 3 OS=Mus musculus OX=10090 GN=Stk3 PE=1 SV=1
1015	11185	Q9WU62|INCE_MOUSE	126.58	5	5	206.75	3	3	4		101209	Inner centromere protein OS=Mus musculus OX=10090 GN=Incenp PE=1 SV=2
1233	27815	Q9CTH6|FCF1_MOUSE	126.25	15	15	3025.1	3	3	3	Carbamidomethylation	23341	rRNA-processing protein FCF1 homolog OS=Mus musculus OX=10090 GN=Fcf1 PE=2 SV=2
811	1476	Q3TDQ1|STT3B_MOUSE	126.17	4	4	2997.2	3	3	7	Carbamidomethylation; Oxidation (M)	93246	Dolichyl-diphosphooligosaccharide--protein glycosyltransferase subunit STT3B OS=Mus musculus OX=10090 GN=Stt3b PE=1 SV=2
920	7475	Q8BL97|SRSF7_MOUSE	126.13	13	13	2417.4	4	4	5		30818	Serine/arginine-rich splicing factor 7 OS=Mus musculus OX=10090 GN=Srsf7 PE=1 SV=1
810	326	P58468|F207A_MOUSE	125.84	22	22	5515.6	4	4	7		24814	Protein FAM207A OS=Mus musculus OX=10090 GN=Fam207a PE=1 SV=1
1142	468	P01027|CO3_MOUSE	125.75	2	2	6866.3	3	3	3		186483	Complement C3 OS=Mus musculus OX=10090 GN=C3 PE=1 SV=3
1465	827	P83870|PHF5A_MOUSE	125.73	26	26	5655.2	2	2	2	Carbamidomethylation	12405	PHD finger-like domain-containing protein 5A OS=Mus musculus OX=10090 GN=Phf5a PE=1 SV=1
692	1538	Q9DBZ5|EIF3K_MOUSE	125.63	18	18	6002.1	3	3	9	Oxidation (M)	25087	Eukaryotic translation initiation factor 3 subunit K OS=Mus musculus OX=10090 GN=Eif3k PE=1 SV=1
927	506	Q9D0I9|SYRC_MOUSE	125.16	7	7	1537.9	4	4	5	Carbamidomethylation; Acetylation (Protein N-term)	75674	Arginine--tRNA ligase cytoplasmic OS=Mus musculus OX=10090 GN=Rars1 PE=1 SV=2
799	1401	Q8BGS0|MAK16_MOUSE	124.92	14	14	1650.4	3	3	7	Carbamidomethylation; Oxidation (M); Acetylation (Protein N-term)	35185	Protein MAK16 homolog OS=Mus musculus OX=10090 GN=Mak16 PE=1 SV=1
1154	2962	Q7TS74|CKP2L_MOUSE	124.84	4	4	1826.1	3	3	3		82999	Cytoskeleton-associated protein 2-like OS=Mus musculus OX=10090 GN=Ckap2l PE=1 SV=1
1070	1441	P70182|PI51A_MOUSE	124.77	12	12	1327.5	4	4	4	Carbamidomethylation; Acetylation (Protein N-term)	60485	Phosphatidylinositol 4-phosphate 5-kinase type-1 alpha OS=Mus musculus OX=10090 GN=Pip5k1a PE=1 SV=2
985	2673	Q9Z2E2|MBD1_MOUSE	124.58	6	6	1500.8	3	3	5	Carbamidomethylation; Acetylation (Protein N-term)	70023	Methyl-CpG-binding domain protein 1 OS=Mus musculus OX=10090 GN=Mbd1 PE=1 SV=2
902	1224	Q99K51|PLST_MOUSE	124.54	6	6	426.86	3	3	5		70742	Plastin-3 OS=Mus musculus OX=10090 GN=Pls3 PE=1 SV=3
846	1465	Q9CWT6|DDX28_MOUSE	124.33	8	8	1051.9	3	3	6		59515	Probable ATP-dependent RNA helicase DDX28 OS=Mus musculus OX=10090 GN=Ddx28 PE=2 SV=2
202	7944	P62862|RS30_MOUSE	124.3	20	20	230700	3	3	42	Deamidation (NQ)	6648	40S ribosomal protein S30 OS=Mus musculus OX=10090 GN=Fau PE=1 SV=1
870	519	Q8BG81|PDIP3_MOUSE	124.21	10	10	2827.2	3	3	6	Acetylation (Protein N-term)	46133	Polymerase delta-interacting protein 3 OS=Mus musculus OX=10090 GN=Poldip3 PE=1 SV=1
1237	2084	P56183|RRP1_MOUSE	124.19	9	9	1259.4	3	3	3		54777	Ribosomal RNA processing protein 1 homolog A OS=Mus musculus OX=10090 GN=Rrp1 PE=1 SV=2
1178	7910	Q9EPJ9|ARFG1_MOUSE	124.16	12	12	1556.6	3	3	3	Carbamidomethylation	45288	ADP-ribosylation factor GTPase-activating protein 1 OS=Mus musculus OX=10090 GN=Arfgap1 PE=1 SV=2
1230	899	Q64433|CH10_MOUSE	124.14	33	33	3877.8	3	3	3		10963	10 kDa heat shock protein mitochondrial OS=Mus musculus OX=10090 GN=Hspe1 PE=1 SV=2
982	16741	Q9QZD8|DIC_MOUSE	123.88	17	17	1381.6	4	4	5	Carbamidomethylation; Deamidation (NQ)	31715	Mitochondrial dicarboxylate carrier OS=Mus musculus OX=10090 GN=Slc25a10 PE=1 SV=2
844	932	Q3UV17|K22O_MOUSE	123.88	3	3	18997	3	1	6	Carbamidomethylation	62845	Keratin type II cytoskeletal 2 oral OS=Mus musculus OX=10090 GN=Krt76 PE=1 SV=1
990	7450	P0CL69|ZN703_MOUSE	123.78	8	8	1607.5	3	3	5		58730	Zinc finger protein 703 OS=Mus musculus OX=10090 GN=Znf703 PE=1 SV=1
605	7443	P28656|NP1L1_MOUSE	123.73	12	12	7917.4	3	3	11		45345	Nucleosome assembly protein 1-like 1 OS=Mus musculus OX=10090 GN=Nap1l1 PE=1 SV=2
416	876	P47964|RL36_MOUSE	123.69	21	21	212380	3	3	18	Carbamidomethylation; Oxidation (M); Acetylation (Protein N-term)	12216	60S ribosomal protein L36 OS=Mus musculus OX=10090 GN=Rpl36 PE=1 SV=2
855	1414	Q8K3Z9|PO121_MOUSE	123.57	5	5	1884.9	5	5	6	Carbamidomethylation	121022	Nuclear envelope pore membrane protein POM 121 OS=Mus musculus OX=10090 GN=Pom121 PE=1 SV=2
745	942	P97376|FRG1_MOUSE	123.55	20	20	2563.4	4	4	8	Carbamidomethylation; Oxidation (M)	29127	Protein FRG1 OS=Mus musculus OX=10090 GN=Frg1 PE=1 SV=2
955	1387	Q64131|RUNX3_MOUSE	123.35	9	9	649.29	3	2	5	Oxidation (M)	43518	Runt-related transcription factor 3 OS=Mus musculus OX=10090 GN=Runx3 PE=1 SV=3
512	605	O35130|NEP1_MOUSE	123.3	19	19	1588.6	4	4	14	Carbamidomethylation; Acetylation (Protein N-term); Deamidation (NQ)	26974	Ribosomal RNA small subunit methyltransferase NEP1 OS=Mus musculus OX=10090 GN=Emg1 PE=1 SV=1
1078	414	O89086|RBM3_MOUSE	123.27	22	22	2810.7	3	3	4	Deamidation (NQ)	16605	RNA-binding protein 3 OS=Mus musculus OX=10090 GN=Rbm3 PE=1 SV=1
693	809	Q9CQW9|IFM3_MOUSE	123.19	28	28	9643.5	2	2	9	Oxidation (M); Acetylation (Protein N-term)	14954	Interferon-induced transmembrane protein 3 OS=Mus musculus OX=10090 GN=Ifitm3 PE=1 SV=1
989	1068	Q60960|IMA5_MOUSE	123.12	8	8	801.26	3	2	5	Carbamidomethylation; Acetylation (Protein N-term)	60183	Importin subunit alpha-5 OS=Mus musculus OX=10090 GN=Kpna1 PE=1 SV=2
1106	8036	Q9CWZ3|RBM8A_MOUSE	123.04	32	32	1208.1	3	3	4	Oxidation (M); Acetylation (Protein N-term)	19889	RNA-binding protein 8A OS=Mus musculus OX=10090 GN=Rbm8a PE=1 SV=4
825	1417	Q8BHJ9|SLU7_MOUSE	122.87	7	7	861.91	3	3	7	Acetylation (Protein N-term)	68080	Pre-mRNA-splicing factor SLU7 OS=Mus musculus OX=10090 GN=Slu7 PE=1 SV=1
1201	834	Q9D2L9|F111A_MOUSE	122.85	7	7	926.08	3	3	3	Carbamidomethylation	69949	Protein FAM111A OS=Mus musculus OX=10090 GN=Fam111a PE=2 SV=1
859	1192	Q924W7|DEN2B_MOUSE	122.69	5	5	252.35	3	3	6		126861	DENN domain-containing protein 2B OS=Mus musculus OX=10090 GN=Dennd2b PE=1 SV=1
889	27808	Q8K4F6|NSUN5_MOUSE	122.59	11	11	1233.7	4	4	6		51030	Probable 28S rRNA (cytosine-C(5))-methyltransferase OS=Mus musculus OX=10090 GN=Nsun5 PE=2 SV=2
1020	865	Q61510|TRI25_MOUSE	122.48	4	4	1722	2	2	4	Carbamidomethylation	71726	E3 ubiquitin/ISG15 ligase TRIM25 OS=Mus musculus OX=10090 GN=Trim25 PE=1 SV=2
1138	726	A2AJK6|CHD7_MOUSE	122.3	2	2	917.51	3	3	3	Oxidation (M); Deamidation (NQ)	334061	Chromodomain-helicase-DNA-binding protein 7 OS=Mus musculus OX=10090 GN=Chd7 PE=1 SV=1
829	18793	Q8CFE4|SCYL2_MOUSE	122.28	5	5	1060.4	3	3	7	Oxidation (M)	103317	SCY1-like protein 2 OS=Mus musculus OX=10090 GN=Scyl2 PE=1 SV=1
961	1748	Q99LT0|DPY30_MOUSE	122.27	52	52	1117.5	4	4	5	Oxidation (M); Acetylation (Protein N-term)	11213	Protein dpy-30 homolog OS=Mus musculus OX=10090 GN=Dpy30 PE=1 SV=1
510	1127	Q6P9Z1|SMRD3_MOUSE	122.27	13	13	1466.7	4	3	14	Oxidation (M)	54986	SWI/SNF-related matrix-associated actin-dependent regulator of chromatin subfamily D member 3 OS=Mus musculus OX=10090 GN=Smarcd3 PE=1 SV=2
946	6717	A2APB8|TPX2_MOUSE	122.25	6	6	710.85	4	4	5	Carbamidomethylation	85894	Targeting protein for Xklp2 OS=Mus musculus OX=10090 GN=Tpx2 PE=1 SV=1
923	2409	Q67FY2|BCL9L_MOUSE	122.15	4	4	2743.7	5	5	5		156679	B-cell CLL/lymphoma 9-like protein OS=Mus musculus OX=10090 GN=Bcl9l PE=1 SV=1
835	6892	O08791|COE3_MOUSE	121.84	6	6	649.98	3	3	6	Acetylation (Protein N-term)	64878	Transcription factor COE3 OS=Mus musculus OX=10090 GN=Ebf3 PE=1 SV=1
753	368	Q9WVA4|TAGL2_MOUSE	121.49	28	28	420.98	4	4	8	Oxidation (M)	22395	Transgelin-2 OS=Mus musculus OX=10090 GN=Tagln2 PE=1 SV=4
951	1890	Q8BHB4|WDR3_MOUSE	121.25	7	7	2679.2	4	4	5	Deamidation (NQ)	105775	WD repeat-containing protein 3 OS=Mus musculus OX=10090 GN=Wdr3 PE=1 SV=1
962	3383	Q9D8M7|PHF10_MOUSE	121.24	7	7	738.27	3	3	5	Carbamidomethylation	55840	PHD finger protein 10 OS=Mus musculus OX=10090 GN=Phf10 PE=1 SV=4
1112	16795	Q8R3H7|HS2ST_MOUSE	121.13	9	9	437.92	2	2	4	Carbamidomethylation	41813	Heparan sulfate 2-O-sulfotransferase 1 OS=Mus musculus OX=10090 GN=Hs2st1 PE=1 SV=2
768	12609	A2APV2|FMNL2_MOUSE	121.03	4	4	14064	4	1	7		123101	Formin-like protein 2 OS=Mus musculus OX=10090 GN=Fmnl2 PE=1 SV=2
1184	1717	Q9WV70|NOC2L_MOUSE	120.9	4	4	1241.7	2	2	3	Carbamidomethylation	85424	Nucleolar complex protein 2 homolog OS=Mus musculus OX=10090 GN=Noc2l PE=1 SV=2
1179	1486	Q8R2N2|UTP4_MOUSE	120.71	6	6	1517.3	3	3	3	Carbamidomethylation	76909	U3 small nucleolar RNA-associated protein 4 homolog OS=Mus musculus OX=10090 GN=Utp4 PE=2 SV=3
916	8021	Q9D4H9|PHF14_MOUSE	120.44	6	6	539.01	4	4	5	Carbamidomethylation	99105	PHD finger protein 14 OS=Mus musculus OX=10090 GN=Phf14 PE=1 SV=1
1071	887	Q3UHX9|CI114_MOUSE	120.24	13	13	2528.7	4	4	4	Carbamidomethylation	42958	Putative methyltransferase C9orf114 homolog OS=Mus musculus OX=10090 GN=Spout1 PE=1 SV=1
919	1552	Q62189|SNRPA_MOUSE	120.06	12	12	4601.3	3	3	5	Oxidation (M); Acetylation (Protein N-term)	31835	U1 small nuclear ribonucleoprotein A OS=Mus musculus OX=10090 GN=Snrpa PE=1 SV=3
1217	1374	Q9CRA8|EXOS5_MOUSE	120	12	12	482.28	2	2	3		25194	Exosome complex component RRP46 OS=Mus musculus OX=10090 GN=Exosc5 PE=1 SV=1
906	974	Q6DFV5|HELZ_MOUSE	119.85	3	3	45142	4	4	5		219878	Probable helicase with zinc finger domain OS=Mus musculus OX=10090 GN=Helz PE=1 SV=2
952	27807	Q3U6N9|CH033_MOUSE	119.84	27	27	2647.2	4	4	5	Carbamidomethylation	24465	UPF0488 protein C8orf33 homolog OS=Mus musculus OX=10090 PE=2 SV=1
978	1628	P61963|DCAF7_MOUSE	119.8	13	13	2023.1	4	4	5		38926	DDB1- and CUL4-associated factor 7 OS=Mus musculus OX=10090 GN=Dcaf7 PE=1 SV=1
1043	653	Q3UMT1|PP12C_MOUSE	119.71	4	4	695.05	2	2	4	Carbamidomethylation	84685	Protein phosphatase 1 regulatory subunit 12C OS=Mus musculus OX=10090 GN=Ppp1r12c PE=1 SV=1
794	27809	Q9CZ83|RM55_MOUSE	119.68	43	43	1810.7	4	4	7	Carbamidomethylation; Oxidation (M)	15122	39S ribosomal protein L55 mitochondrial OS=Mus musculus OX=10090 GN=Mrpl55 PE=1 SV=1
1235	3984	O55029|COPB2_MOUSE	119.35	4	4	843.28	3	3	3	Carbamidomethylation	102449	Coatomer subunit beta' OS=Mus musculus OX=10090 GN=Copb2 PE=1 SV=2
1090	854	Q9WTY4|AQP5_MOUSE	119.31	10	10	6157.6	2	2	4	Oxidation (M); Deamidation (NQ)	28274	Aquaporin-5 OS=Mus musculus OX=10090 GN=Aqp5 PE=1 SV=1
1383	824	Q9R0B7|ZN346_MOUSE	119.1	10	10	961.74	2	2	2	Carbamidomethylation	32698	Zinc finger protein 346 OS=Mus musculus OX=10090 GN=Znf346 PE=1 SV=1
1384	11240	Q9CWK3|CD2B2_MOUSE	118.87	10	10	929.21	2	2	2		37694	CD2 antigen cytoplasmic tail-binding protein 2 OS=Mus musculus OX=10090 GN=Cd2bp2 PE=1 SV=1
1024	2957	Q7TT37|ELP1_MOUSE	118.87	3	3	853.72	4	4	4		149583	Elongator complex protein 1 OS=Mus musculus OX=10090 GN=Elp1 PE=1 SV=2
785	1434	Q8BIG4|FBX28_MOUSE	118.83	10	10	943.88	2	2	7		40978	F-box only protein 28 OS=Mus musculus OX=10090 GN=Fbxo28 PE=1 SV=1
612	27812	Q8VE80|THOC3_MOUSE	118.81	15	15	2210.9	3	3	11	Carbamidomethylation; Oxidation (M); Acetylation (Protein N-term); Deamidation (NQ)	38738	THO complex subunit 3 OS=Mus musculus OX=10090 GN=Thoc3 PE=2 SV=1
993	16754	A2RTL5|RSRC2_MOUSE	118.56	7	7	805.77	2	2	5	Carbamidomethylation	43877	Arginine/serine-rich coiled-coil protein 2 OS=Mus musculus OX=10090 GN=Rsrc2 PE=2 SV=1
928	1941	Q6R891|NEB2_MOUSE	118.12	5	5	587.8	3	3	5		89520	Neurabin-2 OS=Mus musculus OX=10090 GN=Ppp1r9b PE=1 SV=1
827	1495	P61027|RAB10_MOUSE	117.89	17	17	380.92	3	1	7		22541	Ras-related protein Rab-10 OS=Mus musculus OX=10090 GN=Rab10 PE=1 SV=1
843	9485	B2RR83|YTDC2_MOUSE	117.79	4	4	369.87	4	4	6		161091	3'-5' RNA helicase YTHDC2 OS=Mus musculus OX=10090 GN=Ythdc2 PE=1 SV=1
929	475	Q9DBC7|KAP0_MOUSE	117.78	13	13	1661.3	4	4	5	Carbamidomethylation	43185	cAMP-dependent protein kinase type I-alpha regulatory subunit OS=Mus musculus OX=10090 GN=Prkar1a PE=1 SV=3
953	9982	Q5SF07|IF2B2_MOUSE	117.7	6	6	2483.8	3	3	5		65584	Insulin-like growth factor 2 mRNA-binding protein 2 OS=Mus musculus OX=10090 GN=Igf2bp2 PE=1 SV=1
808	3794	P80313|TCPH_MOUSE	117.68	9	9	1137.3	4	4	7	Carbamidomethylation; Deamidation (NQ)	59652	T-complex protein 1 subunit eta OS=Mus musculus OX=10090 GN=Cct7 PE=1 SV=1
1092	1391	P63325|RS10_MOUSE	117.65	15	15	4261	3	3	4	Oxidation (M)	18916	40S ribosomal protein S10 OS=Mus musculus OX=10090 GN=Rps10 PE=1 SV=1
959	571	Q8K019|BCLF1_MOUSE	117.61	4	4	2800	3	3	5		106002	Bcl-2-associated transcription factor 1 OS=Mus musculus OX=10090 GN=Bclaf1 PE=1 SV=2
1028	7128	Q5RJ54|ZSC26_MOUSE	117.57	8	8	579.26	3	3	4	Carbamidomethylation; Deamidation (NQ)	53526	Zinc finger and SCAN domain-containing protein 26 OS=Mus musculus OX=10090 GN=Zscan26 PE=2 SV=1
703	1050	P54823|DDX6_MOUSE	117.46	11	11	1899	3	3	9	Deamidation (NQ)	54192	Probable ATP-dependent RNA helicase DDX6 OS=Mus musculus OX=10090 GN=Ddx6 PE=1 SV=1
1207	1549	Q9CZN7|GLYM_MOUSE	117.35	5	5	1187.1	2	2	3	Carbamidomethylation	55759	Serine hydroxymethyltransferase mitochondrial OS=Mus musculus OX=10090 GN=Shmt2 PE=1 SV=1
970	401	Q921I9|EXOS4_MOUSE	117.3	12	12	5377.2	2	2	5	Carbamidomethylation; Acetylation (Protein N-term); Deamidation (NQ)	26250	Exosome complex component RRP41 OS=Mus musculus OX=10090 GN=Exosc4 PE=1 SV=3
1058	839	Q9R0P5|DEST_MOUSE	117.27	22	22	3015.9	3	3	4	Carbamidomethylation; Acetylation (Protein N-term); Deamidation (NQ)	18522	Destrin OS=Mus musculus OX=10090 GN=Dstn PE=1 SV=3
890	977	Q8BJW5|NOL11_MOUSE	117.01	6	6	1228.5	4	4	6	Carbamidomethylation	80818	Nucleolar protein 11 OS=Mus musculus OX=10090 GN=Nol11 PE=2 SV=1
880	16891	P51174|ACADL_MOUSE	116.93	11	11	949.68	3	3	6	Carbamidomethylation	47908	Long-chain specific acyl-CoA dehydrogenase mitochondrial OS=Mus musculus OX=10090 GN=Acadl PE=1 SV=2
910	787	Q9R1C7|PR40A_MOUSE	116.89	5	5	3891.1	5	5	5		108481	Pre-mRNA-processing factor 40 homolog A OS=Mus musculus OX=10090 GN=Prpf40a PE=1 SV=1
1148	1420	Q3TZZ7|ESYT2_MOUSE	116.81	4	4	973.02	3	3	3		94139	Extended synaptotagmin-2 OS=Mus musculus OX=10090 GN=Esyt2 PE=1 SV=1
1103	27816	Q8K2R5|ZN668_MOUSE	116.6	6	6	538.59	3	3	4	Carbamidomethylation	68347	Zinc finger protein 668 OS=Mus musculus OX=10090 GN=Znf668 PE=2 SV=1
756	1747	Q6PGG6|GNL3L_MOUSE	116.53	7	7	1410.1	3	3	8	Carbamidomethylation	65195	Guanine nucleotide-binding protein-like 3-like protein OS=Mus musculus OX=10090 GN=Gnl3l PE=1 SV=1
299	1406	Q6ZWY3|RS27L_MOUSE	116.43	29	29	7522.2	2	1	26	Oxidation (M); Deamidation (NQ)	9477	40S ribosomal protein S27-like OS=Mus musculus OX=10090 GN=Rps27l PE=1 SV=3
1166	331	P97350|PKP1_MOUSE	116.26	6	6	324.2	3	3	3	Carbamidomethylation	80896	Plakophilin-1 OS=Mus musculus OX=10090 GN=Pkp1 PE=1 SV=1
925	6153	Q6NZJ6|IF4G1_MOUSE	116.23	4	4	568.84	4	4	5		176076	Eukaryotic translation initiation factor 4 gamma 1 OS=Mus musculus OX=10090 GN=Eif4g1 PE=1 SV=1
1359	5709	Q8BX02|KANK2_MOUSE	116.18	3	3	778.3	2	2	2		90245	KN motif and ankyrin repeat domain-containing protein 2 OS=Mus musculus OX=10090 GN=Kank2 PE=1 SV=1
376	1546	Q9DCG9|TR112_MOUSE	116.05	22	22	19460	2	2	20	Oxidation (M)	14141	Multifunctional methyltransferase subunit TRM112-like protein OS=Mus musculus OX=10090 GN=Trmt112 PE=1 SV=1
943	470	P06151|LDHA_MOUSE	115.9	14	14	3595.7	4	4	5		36499	L-lactate dehydrogenase A chain OS=Mus musculus OX=10090 GN=Ldha PE=1 SV=3
740	1399	P27048|RSMB_MOUSE	115.62	13	13	385080	3	3	8	Deamidation (NQ)	23656	Small nuclear ribonucleoprotein-associated protein B OS=Mus musculus OX=10090 GN=Snrpb PE=1 SV=1
740	1400	P63163|RSMN_MOUSE	115.62	12	12	385080	3	3	8	Deamidation (NQ)	24614	Small nuclear ribonucleoprotein-associated protein N OS=Mus musculus OX=10090 GN=Snrpn PE=1 SV=1
1218	1200	P62071|RRAS2_MOUSE	115.61	14	14	964	2	2	3		23400	Ras-related protein R-Ras2 OS=Mus musculus OX=10090 GN=Rras2 PE=1 SV=1
1209	7487	Q62351|TFR1_MOUSE	115.47	3	3	832.98	2	2	3		85731	Transferrin receptor protein 1 OS=Mus musculus OX=10090 GN=Tfrc PE=1 SV=1
1037	828	Q6ZPL9|DDX55_MOUSE	115.43	6	6	1516.1	3	3	4		68465	ATP-dependent RNA helicase DDX55 OS=Mus musculus OX=10090 GN=Ddx55 PE=1 SV=2
1197	1462	Q9Z2U0|PSA7_MOUSE	115.32	16	16	677.5	3	3	3		27855	Proteasome subunit alpha type-7 OS=Mus musculus OX=10090 GN=Psma7 PE=1 SV=1
1077	1605	Q9Z321|TOP3B_MOUSE	115.29	4	4	546.52	3	3	4	Carbamidomethylation	96949	DNA topoisomerase 3-beta-1 OS=Mus musculus OX=10090 GN=Top3b PE=1 SV=1
832	1395	Q9D032|SSBP3_MOUSE	114.99	7	7	2076.3	2	1	7		40421	Single-stranded DNA-binding protein 3 OS=Mus musculus OX=10090 GN=Ssbp3 PE=1 SV=2
991	898	Q9CQS8|SC61B_MOUSE	114.99	38	38	4448.2	3	3	5		9958	Protein transport protein Sec61 subunit beta OS=Mus musculus OX=10090 GN=Sec61b PE=1 SV=3
918	7255	Q9Z2D6|MECP2_MOUSE	114.81	11	11	1625.9	3	3	5		52308	Methyl-CpG-binding protein 2 OS=Mus musculus OX=10090 GN=Mecp2 PE=1 SV=1
772	1622	Q9DBJ1|PGAM1_MOUSE	114.5	16	16	506.27	3	3	7	Carbamidomethylation	28832	Phosphoglycerate mutase 1 OS=Mus musculus OX=10090 GN=Pgam1 PE=1 SV=3
652	1418	Q923D4|SF3B5_MOUSE	114.44	30	30	10422	2	2	10	Oxidation (M)	10119	Splicing factor 3B subunit 5 OS=Mus musculus OX=10090 GN=Sf3b5 PE=1 SV=1
893	927	P62880|GBB2_MOUSE	114.42	10	10	1674.5	3	1	6	Carbamidomethylation	37331	Guanine nucleotide-binding protein G(I)/G(S)/G(T) subunit beta-2 OS=Mus musculus OX=10090 GN=Gnb2 PE=1 SV=3
1073	844	Q6P1F6|2ABA_MOUSE	114.28	9	9	3346.9	3	3	4	Carbamidomethylation; Acetylation (Protein N-term)	51692	Serine/threonine-protein phosphatase 2A 55 kDa regulatory subunit B alpha isoform OS=Mus musculus OX=10090 GN=Ppp2r2a PE=1 SV=1
992	565	Q91XV3|BASP1_MOUSE	114.25	24	24	74.538	2	2	5		22087	Brain acid soluble protein 1 OS=Mus musculus OX=10090 GN=Basp1 PE=1 SV=3
909	557	Q8C170|MYO9A_MOUSE	114.23	2	2	178.65	3	2	5	Carbamidomethylation	292118	Unconventional myosin-IXa OS=Mus musculus OX=10090 GN=Myo9a PE=1 SV=2
1053	17109	Q61188|EZH2_MOUSE	114.01	7	7	1288.3	4	4	4	Carbamidomethylation	85292	Histone-lysine N-methyltransferase EZH2 OS=Mus musculus OX=10090 GN=Ezh2 PE=1 SV=2
1040	7462	Q91YR1|TWF1_MOUSE	114.01	8	8	659.18	3	3	4	Oxidation (M); Acetylation (Protein N-term); Deamidation (NQ)	40079	Twinfilin-1 OS=Mus musculus OX=10090 GN=Twf1 PE=1 SV=2
995	1424	Q9DAA6|EXOS1_MOUSE	113.96	17	17	1851.2	2	2	5	Carbamidomethylation	21424	Exosome complex component CSL4 OS=Mus musculus OX=10090 GN=Exosc1 PE=1 SV=1
1177	7872	Q3URU2|PEG3_MOUSE	113.79	3	3	329.97	3	3	3	Carbamidomethylation	178931	Paternally-expressed gene 3 protein OS=Mus musculus OX=10090 GN=Peg3 PE=1 SV=1
1316	7488	Q61602|GLI3_MOUSE	113.54	2	2	532.62	2	2	2	Acetylation (Protein N-term)	171654	Transcriptional activator GLI3 OS=Mus musculus OX=10090 GN=Gli3 PE=1 SV=2
1172	7478	Q6PFR5|TRA2A_MOUSE	113.53	9	9	6053.1	2	2	3		32316	Transformer-2 protein homolog alpha OS=Mus musculus OX=10090 GN=Tra2a PE=1 SV=1
1181	1092	Q8C0C7|SYFA_MOUSE	113.53	8	8	2290.1	3	3	3		57599	Phenylalanine--tRNA ligase alpha subunit OS=Mus musculus OX=10090 GN=Farsa PE=1 SV=1
944	1169	Q8BGD9|IF4B_MOUSE	113.5	8	8	4036	4	4	5		68840	Eukaryotic translation initiation factor 4B OS=Mus musculus OX=10090 GN=Eif4b PE=1 SV=1
1057	1575	Q9JJA4|WDR12_MOUSE	113.38	10	10	4290.1	3	3	4		47347	Ribosome biogenesis protein WDR12 OS=Mus musculus OX=10090 GN=Wdr12 PE=1 SV=1
1025	528	Q8R2M2|TDIF2_MOUSE	113.36	6	6	1038.2	3	3	4		84277	Deoxynucleotidyltransferase terminal-interacting protein 2 OS=Mus musculus OX=10090 GN=Dnttip2 PE=1 SV=1
1198	2093	P27641|XRCC5_MOUSE	113.21	5	5	366.38	3	3	3	Carbamidomethylation	83057	X-ray repair cross-complementing protein 5 OS=Mus musculus OX=10090 GN=Xrcc5 PE=1 SV=4
1121	27837	Q9D6J6|NDUV2_MOUSE	112.97	12	12	616.85	3	3	4		27285	NADH dehydrogenase [ubiquinone] flavoprotein 2 mitochondrial OS=Mus musculus OX=10090 GN=Ndufv2 PE=1 SV=2
757	972	Q9CPS7|PNO1_MOUSE	112.83	11	11	2318	2	2	8	Oxidation (M); Acetylation (Protein N-term)	27454	RNA-binding protein PNO1 OS=Mus musculus OX=10090 GN=Pno1 PE=1 SV=1
801	1078	Q9JJ48|ZC3H8_MOUSE	112.81	11	11	822.66	2	2	7	Oxidation (M)	34913	Zinc finger CCCH domain-containing protein 8 OS=Mus musculus OX=10090 GN=Zc3h8 PE=1 SV=2
739	842	Q99L28|RLP24_MOUSE	112.79	17	17	11606	2	2	8	Oxidation (M)	19611	Probable ribosome biogenesis protein RLP24 OS=Mus musculus OX=10090 GN=Rsl24d1 PE=2 SV=1
1232	7933	Q62523|ZYX_MOUSE	112.71	7	7	1552.8	3	3	3		60546	Zyxin OS=Mus musculus OX=10090 GN=Zyx PE=1 SV=2
738	7634	Q920Q6|MSI2H_MOUSE	112.6	14	14	650.08	3	3	8	Acetylation (Protein N-term); Deamidation (NQ)	36939	RNA-binding protein Musashi homolog 2 OS=Mus musculus OX=10090 GN=Msi2 PE=1 SV=1
1027	500	Q62136|PTN21_MOUSE	112.43	3	3	112.46	3	3	4	Carbamidomethylation; Deamidation (NQ)	133491	Tyrosine-protein phosphatase non-receptor type 21 OS=Mus musculus OX=10090 GN=Ptpn21 PE=1 SV=1
812	7624	P26369|U2AF2_MOUSE	112.04	7	7	1172.9	3	3	7	Carbamidomethylation	53517	Splicing factor U2AF 65 kDa subunit OS=Mus musculus OX=10090 GN=U2af2 PE=1 SV=3
1155	1336	P28741|KIF3A_MOUSE	111.82	5	5	296.05	3	3	3		80170	Kinesin-like protein KIF3A OS=Mus musculus OX=10090 GN=Kif3a PE=1 SV=2
1044	9300	Q9QXE7|TBL1X_MOUSE	111.81	5	5	739.51	2	2	4	Acetylation (Protein N-term)	56802	F-box-like/WD repeat-containing protein TBL1X OS=Mus musculus OX=10090 GN=Tbl1x PE=1 SV=2
907	798	O35134|RPA1_MOUSE	111.34	3	3	727.87	3	3	5	Carbamidomethylation; Deamidation (NQ)	194109	DNA-directed RNA polymerase I subunit RPA1 OS=Mus musculus OX=10090 GN=Polr1a PE=1 SV=2
1047	16778	P84104|SRSF3_MOUSE	111.27	16	16	972.74	3	3	4	Deamidation (NQ)	19330	Serine/arginine-rich splicing factor 3 OS=Mus musculus OX=10090 GN=Srsf3 PE=1 SV=1
798	1382	Q8BUI3|LRWD1_MOUSE	111.17	6	6	1143.6	3	3	7		71594	Leucine-rich repeat and WD repeat-containing protein 1 OS=Mus musculus OX=10090 GN=LRWD1 PE=2 SV=1
1342	640	Q61624|ZN148_MOUSE	110.79	4	4	209.61	2	2	2	Deamidation (NQ)	88751	Zinc finger protein 148 OS=Mus musculus OX=10090 GN=Znf148 PE=1 SV=2
954	2445	Q8BFQ4|WDR82_MOUSE	110.57	13	13	792.33	3	3	5	Oxidation (M)	35079	WD repeat-containing protein 82 OS=Mus musculus OX=10090 GN=Wdr82 PE=1 SV=1
1229	1648	Q60931|VDAC3_MOUSE	110.29	12	12	1996	3	3	3	Carbamidomethylation; Acetylation (Protein N-term)	30753	Voltage-dependent anion-selective channel protein 3 OS=Mus musculus OX=10090 GN=Vdac3 PE=1 SV=1
529	1489	O89079|COPE_MOUSE	110.18	9	9	1290.7	2	2	13	Carbamidomethylation; Oxidation (M)	34567	Coatomer subunit epsilon OS=Mus musculus OX=10090 GN=Cope PE=1 SV=3
1390	893	Q8BMD8|SCMC1_MOUSE	110.01	5	5	1446.9	2	2	2	Carbamidomethylation	52902	Calcium-binding mitochondrial carrier protein SCaMC-1 OS=Mus musculus OX=10090 GN=Slc25a24 PE=1 SV=1
935	1442	Q3UWW6|GA2L3_MOUSE	109.9	5	5	1330.2	2	2	5	Carbamidomethylation; Deamidation (NQ)	74235	GAS2-like protein 3 OS=Mus musculus OX=10090 GN=Gas2l3 PE=1 SV=1
802	7700	Q99M28|RNPS1_MOUSE	109.64	8	8	6138.8	2	2	7	Oxidation (M)	34208	RNA-binding protein with serine-rich domain 1 OS=Mus musculus OX=10090 GN=Rnps1 PE=1 SV=1
563	243	Q9Z2K1|K1C16_MOUSE	109.63	6	6	1141.9	3	1	12	Oxidation (M); Deamidation (NQ)	51606	Keratin type I cytoskeletal 16 OS=Mus musculus OX=10090 GN=Krt16 PE=1 SV=3
1205	27819	P63321|RALA_MOUSE	108.76	12	12	233.49	2	1	3		23553	Ras-related protein Ral-A OS=Mus musculus OX=10090 GN=Rala PE=1 SV=1
1400	1393	P54116|STOM_MOUSE	108.69	11	11	367.27	2	2	2		31375	Erythrocyte band 7 integral membrane protein OS=Mus musculus OX=10090 GN=Stom PE=1 SV=3
1139	7432	Q8VDM4|PSMD2_MOUSE	108.6	5	5	352.04	3	3	3		100203	26S proteasome non-ATPase regulatory subunit 2 OS=Mus musculus OX=10090 GN=Psmd2 PE=1 SV=1
1188	1603	Q922J9|FACR1_MOUSE	108.57	5	5	1265.2	2	2	3		59435	Fatty acyl-CoA reductase 1 OS=Mus musculus OX=10090 GN=Far1 PE=1 SV=1
838	1891	Q99MR1|GGYF1_MOUSE	108.49	4	4	947.2	3	3	6	Acetylation (Protein N-term)	116238	GRB10-interacting GYF protein 1 OS=Mus musculus OX=10090 GN=Gigyf1 PE=1 SV=2
1123	1377	O35682|MYADM_MOUSE	108.35	8	8	2153.4	2	2	4		35285	Myeloid-associated differentiation marker OS=Mus musculus OX=10090 GN=Myadm PE=1 SV=2
1213	1170	Q8K284|TF3C1_MOUSE	108.31	2	2	354.74	2	2	3	Carbamidomethylation	237474	General transcription factor 3C polypeptide 1 OS=Mus musculus OX=10090 GN=Gtf3c1 PE=1 SV=2
1199	1637	Q9DC48|PRP17_MOUSE	108.29	6	6	656.31	3	3	3	Carbamidomethylation	65461	Pre-mRNA-processing factor 17 OS=Mus musculus OX=10090 GN=Cdc40 PE=2 SV=1
831	1720	P01660|KV3A8_MOUSE	108.2	26	26	3598.3	2	2	7		12099	Ig kappa chain V-III region PC 3741/TEPC 111 OS=Mus musculus OX=10090 PE=1 SV=1
1063	1038	Q9JI13|SAS10_MOUSE	108.18	11	11	1948.6	3	3	4		53399	Something about silencing protein 10 OS=Mus musculus OX=10090 GN=Utp3 PE=1 SV=1
1041	1463	Q3U182|CRTC2_MOUSE	108.16	5	5	216.74	2	2	4	Acetylation (Protein N-term); Deamidation (NQ)	73216	CREB-regulated transcription coactivator 2 OS=Mus musculus OX=10090 GN=Crtc2 PE=1 SV=2
912	7363	Q91VY9|ZN622_MOUSE	108.03	8	8	1359.6	3	3	5	Carbamidomethylation; Acetylation (Protein N-term)	53451	Zinc finger protein 622 OS=Mus musculus OX=10090 GN=Znf622 PE=1 SV=1
1242	1526	Q9CXG3|PPIL4_MOUSE	107.86	5	5	758.29	2	2	3	Deamidation (NQ)	57230	Peptidyl-prolyl cis-trans isomerase-like 4 OS=Mus musculus OX=10090 GN=Ppil4 PE=1 SV=2
856	4733	Q6PHZ5|RB15B_MOUSE	107.58	4	4	76958	3	3	6		97076	Putative RNA-binding protein 15B OS=Mus musculus OX=10090 GN=Rbm15b PE=1 SV=2
1064	2081	Q9CR47|NSA2_MOUSE	107.44	17	17	3753.7	3	3	4	Carbamidomethylation	30036	Ribosome biogenesis protein NSA2 homolog OS=Mus musculus OX=10090 GN=Nsa2 PE=2 SV=1
1189	1427	Q6NV83|SR140_MOUSE	107.28	3	3	1409.8	2	2	3		118261	U2 snRNP-associated SURP motif-containing protein OS=Mus musculus OX=10090 GN=U2surp PE=1 SV=3
1087	7496	P10852|4F2_MOUSE	107.09	6	6	755.87	3	3	4		58337	4F2 cell-surface antigen heavy chain OS=Mus musculus OX=10090 GN=Slc3a2 PE=1 SV=1
1011	2955	Q9Z2U2|ZN292_MOUSE	107.06	2	2	159.63	3	3	4		301047	Zinc finger protein 292 OS=Mus musculus OX=10090 GN=Zfp292 PE=1 SV=2
1157	16877	Q9D7N3|RT09_MOUSE	106.96	7	7	1010	2	2	3		44929	28S ribosomal protein S9 mitochondrial OS=Mus musculus OX=10090 GN=Mrps9 PE=1 SV=3
917	4167	E9Q784|ZC3HD_MOUSE	106.77	2	2	504.75	3	3	5	Carbamidomethylation	203754	Zinc finger CCCH domain-containing protein 13 OS=Mus musculus OX=10090 GN=Zc3h13 PE=1 SV=1
931	610	Q80U70|SUZ12_MOUSE	106.77	5	5	1210.6	3	3	5		83026	Polycomb protein Suz12 OS=Mus musculus OX=10090 GN=Suz12 PE=1 SV=2
1083	1639	Q8K2K6|AGFG1_MOUSE	106.76	7	7	817.42	3	2	4		58043	Arf-GAP domain and FG repeat-containing protein 1 OS=Mus musculus OX=10090 GN=Agfg1 PE=1 SV=2
797	1145	Q03347|RUNX1_MOUSE	106.52	10	10	715.77	3	3	7		48610	Runt-related transcription factor 1 OS=Mus musculus OX=10090 GN=Runx1 PE=1 SV=1
1161	1405	Q925J9|MED1_MOUSE	106.49	2	2	1477.2	2	2	3		167140	Mediator of RNA polymerase II transcription subunit 1 OS=Mus musculus OX=10090 GN=Med1 PE=1 SV=2
983	1583	Q9Z2E1|MBD2_MOUSE	106.07	9	9	1525	3	3	5		43501	Methyl-CpG-binding domain protein 2 OS=Mus musculus OX=10090 GN=Mbd2 PE=2 SV=2
1244	16973	P54071|IDHP_MOUSE	106	6	6	0	2	2	3	Carbamidomethylation	50906	Isocitrate dehydrogenase [NADP] mitochondrial OS=Mus musculus OX=10090 GN=Idh2 PE=1 SV=3
1355	1776	Q7TNV0|DEK_MOUSE	105.97	7	7	586.18	2	2	2		43159	Protein DEK OS=Mus musculus OX=10090 GN=Dek PE=1 SV=1
1066	1756	Q9CZI9|AEN_MOUSE	105.78	9	9	1849.6	2	2	4	Carbamidomethylation	37309	Apoptosis-enhancing nuclease OS=Mus musculus OX=10090 GN=Aen PE=2 SV=1
994	901	P01868|IGHG1_MOUSE	105.49	9	9	3827.7	2	2	5	Oxidation (M); Deamidation (NQ)	35705	Ig gamma-1 chain C region secreted form OS=Mus musculus OX=10090 GN=Ighg1 PE=1 SV=1
994	902	P01869|IGH1M_MOUSE	105.49	7	7	3827.7	2	2	5	Oxidation (M); Deamidation (NQ)	43387	Ig gamma-1 chain C region membrane-bound form OS=Mus musculus OX=10090 GN=Ighg1 PE=1 SV=2
578	861	Q8BGZ2|F168A_MOUSE	105.27	11	11	5100	2	2	12	Oxidation (M); Acetylation (Protein N-term)	26184	Protein FAM168A OS=Mus musculus OX=10090 GN=Fam168a PE=1 SV=1
1104	411	Q60932|VDAC1_MOUSE	105.1	14	14	739.86	3	3	4	Carbamidomethylation	32351	Voltage-dependent anion-selective channel protein 1 OS=Mus musculus OX=10090 GN=Vdac1 PE=1 SV=3
1252	1419	P35282|RAB21_MOUSE	104.73	13	13	401.12	2	2	3	Deamidation (NQ)	24106	Ras-related protein Rab-21 OS=Mus musculus OX=10090 GN=Rab21 PE=1 SV=4
1364	7628	P28658|ATX10_MOUSE	104.68	6	6	868.5	2	2	2	Carbamidomethylation	53707	Ataxin-10 OS=Mus musculus OX=10090 GN=Atxn10 PE=1 SV=2
1114	1543	Q61850|FOXC2_MOUSE	104.59	5	5	1184.3	2	2	4		52874	Forkhead box protein C2 OS=Mus musculus OX=10090 GN=Foxc2 PE=1 SV=2
1730	12310	Q91XI1|DUS3L_MOUSE	104.56	3	3	163	1	1	1	Carbamidomethylation; Acetylation (Protein N-term)	71079	tRNA-dihydrouridine(47) synthase [NAD(P)(+)]-like OS=Mus musculus OX=10090 GN=Dus3l PE=1 SV=1
1245	17090	Q78IK2|ATPMD_MOUSE	104.51	43	43	1514.5	2	2	3		6382	ATP synthase membrane subunit DAPIT mitochondrial OS=Mus musculus OX=10090 GN=Atp5md PE=1 SV=1
1249	971	Q9D211|C2AIL_MOUSE	104.49	19	19	646.6	2	2	3	Acetylation (Protein N-term)	13209	CDKN2AIP N-terminal-like protein OS=Mus musculus OX=10090 GN=Cdkn2aipnl PE=3 SV=1
1470	17348	P58064|RT06_MOUSE	104.37	19	19	1143.3	2	2	2	Carbamidomethylation	14309	28S ribosomal protein S6 mitochondrial OS=Mus musculus OX=10090 GN=Mrps6 PE=1 SV=3
1247	27836	Q91Z49|UIF_MOUSE	104.17	8	8	1979.9	2	2	3		35887	UAP56-interacting factor OS=Mus musculus OX=10090 GN=Fyttd1 PE=1 SV=1
1236	1711	Q8R003|MBNL3_MOUSE	104.16	8	8	516.7	3	2	3	Carbamidomethylation; Acetylation (Protein N-term)	37570	Muscleblind-like protein 3 OS=Mus musculus OX=10090 GN=Mbnl3 PE=2 SV=1
1211	1550	Q61704|ITIH3_MOUSE	103.92	2	2	5085	2	2	3		99358	Inter-alpha-trypsin inhibitor heavy chain H3 OS=Mus musculus OX=10090 GN=Itih3 PE=1 SV=3
1010	3076	Q8CHG3|GCC2_MOUSE	103.85	2	2	440.48	3	3	4		194443	GRIP and coiled-coil domain-containing protein 2 OS=Mus musculus OX=10090 GN=Gcc2 PE=1 SV=2
882	947	P45591|COF2_MOUSE	103.67	14	14	144.96	2	1	6	Acetylation (Protein N-term)	18710	Cofilin-2 OS=Mus musculus OX=10090 GN=Cfl2 PE=1 SV=1
1250	1589	P63037|DNJA1_MOUSE	103.64	6	6	2732.6	2	2	3		44868	DnaJ homolog subfamily A member 1 OS=Mus musculus OX=10090 GN=Dnaja1 PE=1 SV=1
1356	5605	P80317|TCPZ_MOUSE	103.54	5	5	671.3	2	2	2		58004	T-complex protein 1 subunit zeta OS=Mus musculus OX=10090 GN=Cct6a PE=1 SV=3
1471	7641	Q62159|RHOC_MOUSE	103.52	12	12	1205.1	2	2	2	Carbamidomethylation	22006	Rho-related GTP-binding protein RhoC OS=Mus musculus OX=10090 GN=Rhoc PE=1 SV=2
1144	599	P49718|MCM5_MOUSE	103.32	5	5	2314.7	3	3	3	Carbamidomethylation	82407	DNA replication licensing factor MCM5 OS=Mus musculus OX=10090 GN=Mcm5 PE=1 SV=2
1234	639	P61750|ARF4_MOUSE	103.21	20	20	2370.9	3	2	3		20397	ADP-ribosylation factor 4 OS=Mus musculus OX=10090 GN=Arf4 PE=1 SV=2
631	7859	P62996|TRA2B_MOUSE	103.16	12	12	5333.4	3	3	10	Deamidation (NQ)	33666	Transformer-2 protein homolog beta OS=Mus musculus OX=10090 GN=Tra2b PE=1 SV=1
1397	17355	P39876|TIMP3_MOUSE	103.13	11	11	784.67	2	2	2	Carbamidomethylation	24182	Metalloproteinase inhibitor 3 OS=Mus musculus OX=10090 GN=Timp3 PE=1 SV=1
1477	907	Q9D0M0|EXOS7_MOUSE	103.06	9	9	936.29	2	2	2	Acetylation (Protein N-term)	31825	Exosome complex exonuclease RRP42 OS=Mus musculus OX=10090 GN=Exosc7 PE=1 SV=2
984	1590	Q6NVF9|CPSF6_MOUSE	103.02	8	8	2281.9	3	3	5	Carbamidomethylation; Oxidation (M)	59153	Cleavage and polyadenylation specificity factor subunit 6 OS=Mus musculus OX=10090 GN=Cpsf6 PE=1 SV=1
895	7913	P63323|RS12_MOUSE	102.97	20	20	1600	3	3	6	Carbamidomethylation	14525	40S ribosomal protein S12 OS=Mus musculus OX=10090 GN=Rps12 PE=1 SV=2
1117	915	P63001|RAC1_MOUSE	102.96	12	12	2316.4	2	2	4	Carbamidomethylation; Oxidation (M)	21450	Ras-related C3 botulinum toxin substrate 1 OS=Mus musculus OX=10090 GN=Rac1 PE=1 SV=1
1074	1122	E9Q7E2|ARID2_MOUSE	102.94	2	2	865.91	3	3	4	Carbamidomethylation	195987	AT-rich interactive domain-containing protein 2 OS=Mus musculus OX=10090 GN=Arid2 PE=1 SV=1
1200	7426	P59999|ARPC4_MOUSE	102.85	18	18	1008.1	3	3	3		19667	Actin-related protein 2/3 complex subunit 4 OS=Mus musculus OX=10090 GN=Arpc4 PE=1 SV=3
1111	1464	O08715|AKAP1_MOUSE	102.82	4	4	597.8	3	3	4	Carbamidomethylation	92195	A-kinase anchor protein 1 mitochondrial OS=Mus musculus OX=10090 GN=Akap1 PE=1 SV=4
1258	7928	Q9QZE5|COPG1_MOUSE	102.76	3	3	359.62	2	2	3		97513	Coatomer subunit gamma-1 OS=Mus musculus OX=10090 GN=Copg1 PE=1 SV=1
1187	1027	Q9D8N0|EF1G_MOUSE	102.73	6	6	3064.6	2	2	3	Acetylation (Protein N-term)	50061	Elongation factor 1-gamma OS=Mus musculus OX=10090 GN=Eef1g PE=1 SV=3
1406	2070	P24452|CAPG_MOUSE	102.73	8	8	2493.9	2	2	2		39240	Macrophage-capping protein OS=Mus musculus OX=10090 GN=Capg PE=1 SV=2
1320	1620	Q3TWW8|SRSF6_MOUSE	102.68	7	7	737.83	2	2	2	Deamidation (NQ)	39025	Serine/arginine-rich splicing factor 6 OS=Mus musculus OX=10090 GN=Srsf6 PE=1 SV=1
1088	1646	Q8VE37|RCC1_MOUSE	102.54	7	7	516.39	2	2	4		44931	Regulator of chromosome condensation OS=Mus musculus OX=10090 GN=Rcc1 PE=1 SV=1
883	518	Q3V1V3|ESF1_MOUSE	102.44	3	3	496.97	2	2	6	Carbamidomethylation	98048	ESF1 homolog OS=Mus musculus OX=10090 GN=Esf1 PE=1 SV=1
1466	925	P47758|SRPRB_MOUSE	102.35	12	12	1617.4	2	2	2		29579	Signal recognition particle receptor subunit beta OS=Mus musculus OX=10090 GN=Srprb PE=1 SV=1
1062	374	Q8BKF1|RPOM_MOUSE	102.23	3	3	2650.5	3	3	4		136705	DNA-directed RNA polymerase mitochondrial OS=Mus musculus OX=10090 GN=Polrmt PE=1 SV=1
1030	794	O88286|WIZ_MOUSE	102.15	1	1	739.28	2	2	4		184290	Protein Wiz OS=Mus musculus OX=10090 GN=Wiz PE=1 SV=2
1210	883	P11440|CDK1_MOUSE	101.84	8	8	1991	2	2	3	Deamidation (NQ)	34107	Cyclin-dependent kinase 1 OS=Mus musculus OX=10090 GN=Cdk1 PE=1 SV=3
938	888	Q8VEM8|MPCP_MOUSE	101.56	6	6	12220	2	2	5		39632	Phosphate carrier protein mitochondrial OS=Mus musculus OX=10090 GN=Slc25a3 PE=1 SV=1
1052	7891	Q8BHG1|NRDC_MOUSE	101.36	3	3	1192.1	3	3	4	Carbamidomethylation	132891	Nardilysin OS=Mus musculus OX=10090 GN=Nrdc PE=1 SV=1
872	1108	Q99JR8|SMRD2_MOUSE	101.35	8	8	1257.8	3	2	6	Oxidation (M); Deamidation (NQ)	59085	SWI/SNF-related matrix-associated actin-dependent regulator of chromatin subfamily D member 2 OS=Mus musculus OX=10090 GN=Smarcd2 PE=1 SV=2
1169	2373	Q924K8|MTA3_MOUSE	101.34	5	5	108.06	2	1	3		67077	Metastasis-associated protein MTA3 OS=Mus musculus OX=10090 GN=Mta3 PE=1 SV=1
1082	7420	Q9CVB6|ARPC2_MOUSE	101.31	11	11	41650	3	3	4	Carbamidomethylation	34357	Actin-related protein 2/3 complex subunit 2 OS=Mus musculus OX=10090 GN=Arpc2 PE=1 SV=3
1067	6441	P48722|HS74L_MOUSE	101.17	3	3	33.179	2	1	4	Carbamidomethylation	94382	Heat shock 70 kDa protein 4L OS=Mus musculus OX=10090 GN=Hspa4l PE=1 SV=2
1018	7419	Q8BT14|CNOT4_MOUSE	101.04	8	8	1524.3	3	3	4		63474	CCR4-NOT transcription complex subunit 4 OS=Mus musculus OX=10090 GN=Cnot4 PE=1 SV=2
898	1018	Q8BJ71|NUP93_MOUSE	100.98	5	5	1521.6	4	4	5	Oxidation (M); Deamidation (NQ)	93281	Nuclear pore complex protein Nup93 OS=Mus musculus OX=10090 GN=Nup93 PE=1 SV=1
1068	16915	Q9D8M4|RL7L_MOUSE	100.75	12	12	2732.8	2	2	4		28544	60S ribosomal protein L7-like 1 OS=Mus musculus OX=10090 GN=Rpl7l1 PE=1 SV=1
1055	1510	Q61686|CBX5_MOUSE	100.52	19	19	982.05	3	3	4	Carbamidomethylation	22186	Chromobox protein homolog 5 OS=Mus musculus OX=10090 GN=Cbx5 PE=1 SV=1
1239	16760	Q8BH43|WASF2_MOUSE	100.51	8	8	2652.9	3	3	3		54074	Wiskott-Aldrich syndrome protein family member 2 OS=Mus musculus OX=10090 GN=Wasf2 PE=1 SV=1
830	1139	P97863|NFIB_MOUSE	100.36	6	6	2466.1	3	2	7		63507	Nuclear factor 1 B-type OS=Mus musculus OX=10090 GN=Nfib PE=1 SV=2
849	27810	O88796|RPP30_MOUSE	100.29	11	11	2583.5	4	4	6	Acetylation (Protein N-term)	29473	Ribonuclease P protein subunit p30 OS=Mus musculus OX=10090 GN=Rpp30 PE=1 SV=1
1108	2540	Q9WUM4|COR1C_MOUSE	100.17	7	7	409.08	3	3	4	Carbamidomethylation; Deamidation (NQ)	53121	Coronin-1C OS=Mus musculus OX=10090 GN=Coro1c PE=1 SV=2
1395	7456	Q60872|IF1A_MOUSE	100.17	15	15	633.4	2	2	2		16502	Eukaryotic translation initiation factor 1A OS=Mus musculus OX=10090 GN=Eif1a PE=2 SV=3
1395	7465	Q8BMJ3|IF1AX_MOUSE	100.17	15	15	633.4	2	2	2		16460	Eukaryotic translation initiation factor 1A X-chromosomal OS=Mus musculus OX=10090 GN=Eif1ax PE=2 SV=3
1203	6716	Q80W00|PP1RA_MOUSE	100.16	3	3	347.29	2	2	3		94372	Serine/threonine-protein phosphatase 1 regulatory subunit 10 OS=Mus musculus OX=10090 GN=Ppp1r10 PE=1 SV=1
1403	27839	P52503|NDUS6_MOUSE	100.09	22	22	485.25	2	2	2	Carbamidomethylation	13020	NADH dehydrogenase [ubiquinone] iron-sulfur protein 6 mitochondrial OS=Mus musculus OX=10090 GN=Ndufs6 PE=1 SV=2
1246	8684	Q9R112|SQOR_MOUSE	100	6	6	265.34	2	2	3		50282	Sulfide:quinone oxidoreductase mitochondrial OS=Mus musculus OX=10090 GN=Sqor PE=1 SV=3
1219	11102	P50580|PA2G4_MOUSE	99.96	9	9	265.12	2	2	3	Acetylation (Protein N-term)	43699	Proliferation-associated protein 2G4 OS=Mus musculus OX=10090 GN=Pa2g4 PE=1 SV=3
1048	27820	Q80US4|ARP5_MOUSE	99.63	4	4	215.86	2	2	4		67845	Actin-related protein 5 OS=Mus musculus OX=10090 GN=Actr5 PE=1 SV=3
1469	17597	Q8CIC2|NUP42_MOUSE	99.38	8	8	456.85	2	2	2		44337	Nucleoporin NUP42 OS=Mus musculus OX=10090 GN=Nup42 PE=2 SV=1
1194	16835	Q99JB8|PACN3_MOUSE	99.12	7	7	356.28	2	2	3		48585	Protein kinase C and casein kinase II substrate protein 3 OS=Mus musculus OX=10090 GN=Pacsin3 PE=1 SV=1
987	1536	Q9JKP5|MBNL1_MOUSE	99.02	8	8	9562.8	3	1	5	Carbamidomethylation; Acetylation (Protein N-term)	36976	Muscleblind-like protein 1 OS=Mus musculus OX=10090 GN=Mbnl1 PE=1 SV=1
908	4444	Q9DBY8|NVL_MOUSE	98.96	3	3	84454	2	2	5		94476	Nuclear valosin-containing protein-like OS=Mus musculus OX=10090 GN=Nvl PE=1 SV=1
1354	27818	P70662|LDB1_MOUSE	98.53	5	5	1256.6	2	2	2		46503	LIM domain-binding protein 1 OS=Mus musculus OX=10090 GN=Ldb1 PE=1 SV=2
1038	551	Q6A4J8|UBP7_MOUSE	98.46	3	3	921.53	3	3	4	Carbamidomethylation	128475	Ubiquitin carboxyl-terminal hydrolase 7 OS=Mus musculus OX=10090 GN=Usp7 PE=1 SV=1
997	1521	Q9D1I6|RM14_MOUSE	98.28	20	20	501.36	2	2	5	Deamidation (NQ)	15874	39S ribosomal protein L14 mitochondrial OS=Mus musculus OX=10090 GN=Mrpl14 PE=1 SV=1
770	2211	P53569|CEBPZ_MOUSE	98.2	5	5	1089.7	4	4	7	Carbamidomethylation; Acetylation (Protein N-term)	120262	CCAAT/enhancer-binding protein zeta OS=Mus musculus OX=10090 GN=Cebpz PE=1 SV=2
1467	1651	Q8BIZ6|SNIP1_MOUSE	98.11	8	8	3275.1	2	2	2		44415	Smad nuclear-interacting protein 1 OS=Mus musculus OX=10090 GN=Snip1 PE=1 SV=1
1023	7486	Q9R0L6|PCM1_MOUSE	97.86	3	3	313.5	4	4	4	Carbamidomethylation	228845	Pericentriolar material 1 protein OS=Mus musculus OX=10090 GN=Pcm1 PE=1 SV=2
800	12037	B9EJ86|OSBL8_MOUSE	97.75	3	3	464.23	2	2	7		101269	Oxysterol-binding protein-related protein 8 OS=Mus musculus OX=10090 GN=Osbpl8 PE=1 SV=1
1414	1051	Q62093|SRSF2_MOUSE	97.74	8	8	1913.3	1	1	2		25476	Serine/arginine-rich splicing factor 2 OS=Mus musculus OX=10090 GN=Srsf2 PE=1 SV=4
1475	5843	Q8BX09|RBBP5_MOUSE	97.67	4	4	881.53	2	2	2		59098	Retinoblastoma-binding protein 5 OS=Mus musculus OX=10090 GN=Rbbp5 PE=1 SV=2
1260	7442	Q61074|PPM1G_MOUSE	97.64	4	4	654.55	2	2	3		58728	Protein phosphatase 1G OS=Mus musculus OX=10090 GN=Ppm1g PE=1 SV=3
897	1920	Q8CI51|PDLI5_MOUSE	97.56	6	6	542.86	2	2	6		63299	PDZ and LIM domain protein 5 OS=Mus musculus OX=10090 GN=Pdlim5 PE=1 SV=4
1091	17064	P68433|H31_MOUSE	97.3	15	15	29216	2	2	4		15404	Histone H3.1 OS=Mus musculus OX=10090 GN=H3c1 PE=1 SV=2
1091	11125	P02301|H3C_MOUSE	97.3	15	15	29216	2	2	4		15315	Histone H3.3C OS=Mus musculus OX=10090 GN=H3f3c PE=3 SV=3
1091	11126	P84244|H33_MOUSE	97.3	15	15	29216	2	2	4		15328	Histone H3.3 OS=Mus musculus OX=10090 GN=H3-3a PE=1 SV=2
1091	17065	P84228|H32_MOUSE	97.3	15	15	29216	2	2	4		15388	Histone H3.2 OS=Mus musculus OX=10090 GN=Hist1h3b PE=1 SV=2
1124	1079	Q4FZF3|DDX49_MOUSE	97.29	5	5	1185.1	2	2	4		54094	Probable ATP-dependent RNA helicase DDX49 OS=Mus musculus OX=10090 GN=Ddx49 PE=2 SV=1
1231	7518	O08528|HXK2_MOUSE	97.17	4	4	716.82	3	3	3	Carbamidomethylation	102535	Hexokinase-2 OS=Mus musculus OX=10090 GN=Hk2 PE=1 SV=1
1243	1431	Q61166|MARE1_MOUSE	96.97	13	13	152.42	2	2	3	Acetylation (Protein N-term)	30016	Microtubule-associated protein RP/EB family member 1 OS=Mus musculus OX=10090 GN=Mapre1 PE=1 SV=3
736	1657	Q8VI94|OASL1_MOUSE	96.81	8	8	361.29	3	3	8	Carbamidomethylation; Acetylation (Protein N-term)	59089	2'-5'-oligoadenylate synthase-like protein 1 OS=Mus musculus OX=10090 GN=Oasl1 PE=2 SV=1
1391	628	Q9JM52|MINK1_MOUSE	96.78	2	2	239.95	2	1	2		147294	Misshapen-like kinase 1 OS=Mus musculus OX=10090 GN=Mink1 PE=1 SV=3
968	7452	Q9CYZ8|SSBP2_MOUSE	96.35	7	7	571.08	2	1	5	Oxidation (M)	37846	Single-stranded DNA-binding protein 2 OS=Mus musculus OX=10090 GN=Ssbp2 PE=1 SV=1
1182	7436	Q9EPL8|IPO7_MOUSE	96.31	4	4	329.81	3	3	3	Carbamidomethylation; Oxidation (M); Deamidation (NQ)	119486	Importin-7 OS=Mus musculus OX=10090 GN=Ipo7 PE=1 SV=2
1081	7425	P35564|CALX_MOUSE	96.26	7	7	2475.7	3	3	4		67278	Calnexin OS=Mus musculus OX=10090 GN=Canx PE=1 SV=1
1109	1762	Q9DBG6|RPN2_MOUSE	96.14	6	6	537.51	3	3	4		69063	Dolichyl-diphosphooligosaccharide--protein glycosyltransferase subunit 2 OS=Mus musculus OX=10090 GN=Rpn2 PE=1 SV=1
1122	1531	O35658|C1QBP_MOUSE	95.79	10	10	1504	2	2	4	Oxidation (M); Deamidation (NQ)	31013	Complement component 1 Q subcomponent-binding protein mitochondrial OS=Mus musculus OX=10090 GN=C1qbp PE=1 SV=1
1150	1015	Q99KD5|UN45A_MOUSE	95.74	2	2	696.56	2	2	3		103447	Protein unc-45 homolog A OS=Mus musculus OX=10090 GN=Unc45a PE=1 SV=2
933	12410	Q8VCD5|MED17_MOUSE	95.7	4	4	514.67	3	3	5	Carbamidomethylation	72462	Mediator of RNA polymerase II transcription subunit 17 OS=Mus musculus OX=10090 GN=Med17 PE=1 SV=1
1145	629	Q9ESU6|BRD4_MOUSE	95.65	2	2	581.41	3	3	3		155895	Bromodomain-containing protein 4 OS=Mus musculus OX=10090 GN=Brd4 PE=1 SV=2
1089	1239	Q80ZS3|RT26_MOUSE	95.64	15	15	867.87	2	2	4		23444	28S ribosomal protein S26 mitochondrial OS=Mus musculus OX=10090 GN=Mrps26 PE=1 SV=1
988	1504	Q91V41|RAB14_MOUSE	95.53	17	17	425.49	3	2	5	Acetylation (Protein N-term)	23897	Ras-related protein Rab-14 OS=Mus musculus OX=10090 GN=Rab14 PE=1 SV=3
1208	5903	Q91X78|ERLN1_MOUSE	95.37	7	7	889.05	2	2	3		39182	Erlin-1 OS=Mus musculus OX=10090 GN=Erlin1 PE=1 SV=2
1208	5902	Q8BFZ9|ERLN2_MOUSE	95.37	7	7	889.05	2	2	3		37873	Erlin-2 OS=Mus musculus OX=10090 GN=Erlin2 PE=1 SV=1
1479	16959	Q99N84|RT18B_MOUSE	95.28	8	8	525.82	2	2	2	Carbamidomethylation	28703	28S ribosomal protein S18b mitochondrial OS=Mus musculus OX=10090 GN=Mrps18b PE=1 SV=1
1115	657	O35345|IMA7_MOUSE	95.13	6	6	31.753	2	1	4	Carbamidomethylation	59964	Importin subunit alpha-7 OS=Mus musculus OX=10090 GN=Kpna6 PE=1 SV=2
1116	1654	Q61598|GDIB_MOUSE	94.91	8	8	260.23	2	2	4	Carbamidomethylation	50537	Rab GDP dissociation inhibitor beta OS=Mus musculus OX=10090 GN=Gdi2 PE=1 SV=1
894	7499	Q9R0Q7|TEBP_MOUSE	94.85	25	25	3938.5	3	3	6	Carbamidomethylation	18721	Prostaglandin E synthase 3 OS=Mus musculus OX=10090 GN=Ptges3 PE=1 SV=1
1126	7880	Q80TZ9|RERE_MOUSE	94.6	1	1	356.62	2	2	4		171754	Arginine-glutamic acid dipeptide repeats protein OS=Mus musculus OX=10090 GN=Rere PE=1 SV=3
1042	16719	Q9JLI8|SART3_MOUSE	94.6	3	3	163.12	2	2	4		109619	Squamous cell carcinoma antigen recognized by T-cells 3 OS=Mus musculus OX=10090 GN=Sart3 PE=1 SV=1
1084	5700	Q923D5|WBP11_MOUSE	94.56	4	4	485.31	2	2	4		69875	WW domain-binding protein 11 OS=Mus musculus OX=10090 GN=Wbp11 PE=1 SV=2
936	1892	Q99L47|F10A1_MOUSE	94.32	6	6	593.91	2	2	5		41656	Hsc70-interacting protein OS=Mus musculus OX=10090 GN=St13 PE=1 SV=1
1266	16896	Q9CZ04|CSN7A_MOUSE	94.24	9	9	217.36	2	2	3		30224	COP9 signalosome complex subunit 7a OS=Mus musculus OX=10090 GN=Cops7a PE=1 SV=2
1167	17206	Q9EQC5|SCYL1_MOUSE	94.13	5	5	1440.4	3	3	3		89160	N-terminal kinase-like protein OS=Mus musculus OX=10090 GN=Scyl1 PE=1 SV=1
1398	698	Q6PB66|LPPRC_MOUSE	94.1	2	2	149.34	2	2	2	Carbamidomethylation	156614	Leucine-rich PPR motif-containing protein mitochondrial OS=Mus musculus OX=10090 GN=Lrpprc PE=1 SV=2
1000	3569	Q8VHH5|AGAP3_MOUSE	94.01	3	3	142.45	2	2	5		97965	Arf-GAP with GTPase ANK repeat and PH domain-containing protein 3 OS=Mus musculus OX=10090 GN=Agap3 PE=1 SV=1
1497	27845	Q8VCG3|WDR74_MOUSE	93.72	7	7	547.38	2	2	2		42636	WD repeat-containing protein 74 OS=Mus musculus OX=10090 GN=Wdr74 PE=2 SV=1
884	1036	Q9DB96|NGDN_MOUSE	93.68	9	9	887.69	2	2	6	Deamidation (NQ)	35659	Neuroguidin OS=Mus musculus OX=10090 GN=Ngdn PE=1 SV=1
1491	27842	Q80WC7|AGFG2_MOUSE	93.63	4	4	207.96	2	1	2	Carbamidomethylation	48968	Arf-GAP domain and FG repeat-containing protein 2 OS=Mus musculus OX=10090 GN=Agfg2 PE=1 SV=1
1149	1433	Q8CJ67|STAU2_MOUSE	93.53	5	5	431.61	2	2	3		62535	Double-stranded RNA-binding protein Staufen homolog 2 OS=Mus musculus OX=10090 GN=Stau2 PE=1 SV=1
1468	16830	Q9ER88|RT29_MOUSE	93.48	7	7	432.17	2	2	2	Carbamidomethylation	44699	28S ribosomal protein S29 mitochondrial OS=Mus musculus OX=10090 GN=Dap3 PE=1 SV=1
1146	690	Q80TM6|R3HD2_MOUSE	93.47	2	2	773.88	2	2	3		114583	R3H domain-containing protein 2 OS=Mus musculus OX=10090 GN=R3hdm2 PE=1 SV=2
833	1933	Q8CGC4|LS14B_MOUSE	93.2	8	8	0	2	2	7		42310	Protein LSM14 homolog B OS=Mus musculus OX=10090 GN=Lsm14b PE=1 SV=3
1046	1573	Q62311|TAF6_MOUSE	93.11	5	5	219.06	2	2	4	Carbamidomethylation	72673	Transcription initiation factor TFIID subunit 6 OS=Mus musculus OX=10090 GN=Taf6 PE=1 SV=1
562	526	Q571H0|NPA1P_MOUSE	92.97	2	2	510.86	4	4	12	Carbamidomethylation	254611	Nucleolar pre-ribosomal-associated protein 1 OS=Mus musculus OX=10090 GN=Urb1 PE=1 SV=2
873	1371	Q8BGB5|LIMD2_MOUSE	92.93	13	13	439.94	1	1	6	Oxidation (M); Acetylation (Protein N-term)	14237	LIM domain-containing protein 2 OS=Mus musculus OX=10090 GN=Limd2 PE=1 SV=1
930	2129	P16460|ASSY_MOUSE	92.87	9	9	2951.7	4	4	5		46585	Argininosuccinate synthase OS=Mus musculus OX=10090 GN=Ass1 PE=1 SV=1
1036	552	Q60790|RASA3_MOUSE	92.87	4	4	740.75	3	3	4	Carbamidomethylation	95987	Ras GTPase-activating protein 3 OS=Mus musculus OX=10090 GN=Rasa3 PE=1 SV=2
1303	5742	Q91WD5|NDUS2_MOUSE	92.86	4	4	463.16	2	2	2	Carbamidomethylation	52626	NADH dehydrogenase [ubiquinone] iron-sulfur protein 2 mitochondrial OS=Mus musculus OX=10090 GN=Ndufs2 PE=1 SV=1
1317	1542	Q68FG3|SPT2_MOUSE	92.8	3	3	962.24	2	2	2	Oxidation (M)	74818	Protein SPT2 homolog OS=Mus musculus OX=10090 GN=Spty2d1 PE=2 SV=1
724	886	P62858|RS28_MOUSE	92.42	30	30	5694.8	2	2	8		7841	40S ribosomal protein S28 OS=Mus musculus OX=10090 GN=Rps28 PE=1 SV=1
1313	967	P84091|AP2M1_MOUSE	92.42	4	4	4150.6	2	2	2		49655	AP-2 complex subunit mu OS=Mus musculus OX=10090 GN=Ap2m1 PE=1 SV=1
1264	1530	Q9D0G0|RT30_MOUSE	92.26	5	5	885.98	2	2	3		49939	28S ribosomal protein S30 mitochondrial OS=Mus musculus OX=10090 GN=Mrps30 PE=1 SV=1
1107	27817	Q8BG17|NOL12_MOUSE	92.26	12	12	2611.4	3	3	4		25356	Nucleolar protein 12 OS=Mus musculus OX=10090 GN=Nol12 PE=1 SV=1
1140	1217	Q80Y44|DDX10_MOUSE	92.16	4	4	1572.3	3	3	3		100738	Probable ATP-dependent RNA helicase DDX10 OS=Mus musculus OX=10090 GN=Ddx10 PE=1 SV=2
1389	16757	Q9QWF0|CAF1A_MOUSE	91.9	3	3	360.26	2	2	2	Carbamidomethylation	101936	Chromatin assembly factor 1 subunit A OS=Mus musculus OX=10090 GN=Chaf1a PE=1 SV=1
937	27821	Q9DBA9|TF2H1_MOUSE	91.82	5	5	0	2	2	5	Acetylation (Protein N-term)	61851	General transcription factor IIH subunit 1 OS=Mus musculus OX=10090 GN=Gtf2h1 PE=1 SV=2
1119	502	Q8K2J0|PLCD3_MOUSE	91.66	4	4	546.33	2	2	4	Carbamidomethylation	88607	1-phosphatidylinositol 4 5-bisphosphate phosphodiesterase delta-3 OS=Mus musculus OX=10090 GN=Plcd3 PE=1 SV=2
1715	1397	Q8C1B7|SEP11_MOUSE	91.63	4	4	124.33	1	1	1		49695	Septin-11 OS=Mus musculus OX=10090 GN=Septin11 PE=1 SV=4
956	1478	Q9CXF4|TBC15_MOUSE	91.6	6	6	228.22	3	3	5	Carbamidomethylation	76527	TBC1 domain family member 15 OS=Mus musculus OX=10090 GN=Tbc1d15 PE=1 SV=1
998	7935	Q8VEH3|ARL8A_MOUSE	91.38	12	12	281.06	2	1	5		21390	ADP-ribosylation factor-like protein 8A OS=Mus musculus OX=10090 GN=Arl8a PE=1 SV=1
1072	1582	Q80W68|KIRR1_MOUSE	91.37	9	9	528.64	4	4	4		87176	Kin of IRRE-like protein 1 OS=Mus musculus OX=10090 GN=Kirrel1 PE=1 SV=1
1396	17094	P58059|RT21_MOUSE	91.05	31	31	163.4	2	2	2		10561	28S ribosomal protein S21 mitochondrial OS=Mus musculus OX=10090 GN=Mrps21 PE=1 SV=1
1183	1604	Q9DC51|GNAI3_MOUSE	91.02	7	7	258.12	2	1	3		40538	Guanine nucleotide-binding protein G(i) subunit alpha OS=Mus musculus OX=10090 GN=Gnai3 PE=1 SV=3
1097	1044	Q8CD15|RIOX2_MOUSE	90.83	4	4	113.49	3	3	4	Carbamidomethylation	53517	Ribosomal oxygenase 2 OS=Mus musculus OX=10090 GN=Riox2 PE=1 SV=2
1118	1754	Q61249|IGBP1_MOUSE	90.82	7	7	644.45	2	2	4	Acetylation (Protein N-term)	38971	Immunoglobulin-binding protein 1 OS=Mus musculus OX=10090 GN=Igbp1 PE=1 SV=1
1204	7466	P17918|PCNA_MOUSE	90.68	12	12	507.12	2	2	3	Deamidation (NQ)	28785	Proliferating cell nuclear antigen OS=Mus musculus OX=10090 GN=Pcna PE=1 SV=2
1695	3230	Q61818|RAI1_MOUSE	90.65	1	1	99.608	1	1	1		201570	Retinoic acid-induced protein 1 OS=Mus musculus OX=10090 GN=Rai1 PE=1 SV=3
1021	3951	Q8CG48|SMC2_MOUSE	90.57	2	2	761.77	2	2	4		134239	Structural maintenance of chromosomes protein 2 OS=Mus musculus OX=10090 GN=Smc2 PE=1 SV=2
1192	11468	Q80WT5|AFTIN_MOUSE	90.44	3	3	240.07	2	2	3		101130	Aftiphilin OS=Mus musculus OX=10090 GN=Aftph PE=1 SV=2
1489	7430	Q99MR6|SRRT_MOUSE	90.44	3	3	516.94	2	2	2		100452	Serrate RNA effector molecule homolog OS=Mus musculus OX=10090 GN=Srrt PE=1 SV=1
1158	5280	Q80U49|C170B_MOUSE	90.43	2	2	57.569	2	1	3	Deamidation (NQ)	170820	Centrosomal protein of 170 kDa protein B OS=Mus musculus OX=10090 GN=Cep170b PE=1 SV=2
1407	16866	P97760|RPB3_MOUSE	90.04	7	7	971.06	2	2	2		31443	DNA-directed RNA polymerase II subunit RPB3 OS=Mus musculus OX=10090 GN=Polr2c PE=1 SV=2
996	9429	Q69ZQ2|ISY1_MOUSE	89.86	10	10	313.17	2	2	5		32989	Pre-mRNA-splicing factor ISY1 homolog OS=Mus musculus OX=10090 GN=Isy1 PE=1 SV=2
1240	7536	Q9JIF7|COPB_MOUSE	89.84	5	5	379.34	3	3	3		107066	Coatomer subunit beta OS=Mus musculus OX=10090 GN=Copb1 PE=1 SV=1
1190	1440	Q60596|XRCC1_MOUSE	89.81	7	7	435.37	2	2	3		68971	DNA repair protein XRCC1 OS=Mus musculus OX=10090 GN=Xrcc1 PE=1 SV=2
1275	27846	Q8R1J3|ZCHC9_MOUSE	89.74	10	10	684.22	2	2	3	Oxidation (M)	30488	Zinc finger CCHC domain-containing protein 9 OS=Mus musculus OX=10090 GN=Zcchc9 PE=2 SV=2
1160	1013	P08003|PDIA4_MOUSE	89.4	6	6	181.44	2	2	3		71982	Protein disulfide-isomerase A4 OS=Mus musculus OX=10090 GN=Pdia4 PE=1 SV=3
1487	1599	P28740|KIF2A_MOUSE	89.27	3	3	598.77	2	2	2		79756	Kinesin-like protein KIF2A OS=Mus musculus OX=10090 GN=Kif2a PE=1 SV=2
1257	1591	Q9Z0Z7|KLF5_MOUSE	89.17	5	5	1929.8	2	2	3		49754	Krueppel-like factor 5 OS=Mus musculus OX=10090 GN=Klf5 PE=1 SV=2
714	892	Q8C5Q4|GRSF1_MOUSE	88.89	10	10	1599.4	3	3	8		53076	G-rich sequence factor 1 OS=Mus musculus OX=10090 GN=Grsf1 PE=1 SV=2
1512	19204	Q8R3F5|FABD_MOUSE	88.65	4	4	1638.1	1	1	2		41928	Malonyl-CoA-acyl carrier protein transacylase mitochondrial OS=Mus musculus OX=10090 GN=Mcat PE=1 SV=3
1125	17205	Q61574|FOXS1_MOUSE	88.63	9	9	556.9	2	2	4	Carbamidomethylation	35567	Forkhead box protein S1 OS=Mus musculus OX=10090 GN=Foxs1 PE=2 SV=2
1029	1117	Q3U1J4|DDB1_MOUSE	88.61	5	5	853.69	3	3	4	Carbamidomethylation; Deamidation (NQ)	126853	DNA damage-binding protein 1 OS=Mus musculus OX=10090 GN=Ddb1 PE=1 SV=2
1127	1554	Q921Y2|IMP3_MOUSE	88.58	14	14	1989.2	2	2	4		21777	U3 small nucleolar ribonucleoprotein protein IMP3 OS=Mus musculus OX=10090 GN=Imp3 PE=2 SV=1
1802	1137	Q91YE6|IPO9_MOUSE	88.33	2	2	195.4	1	1	1	Acetylation (Protein N-term)	116052	Importin-9 OS=Mus musculus OX=10090 GN=Ipo9 PE=1 SV=3
1365	19719	P53994|RAB2A_MOUSE	87.86	14	14	505.19	2	2	2		23548	Ras-related protein Rab-2A OS=Mus musculus OX=10090 GN=Rab2a PE=1 SV=1
1321	2789	Q66JV4|R12BB_MOUSE	87.86	2	2	77.885	2	2	2	Carbamidomethylation	96450	RNA-binding protein 12B-B OS=Mus musculus OX=10090 GN=Rbm12b2 PE=2 SV=2
1120	16897	Q9QYF1|RDH11_MOUSE	87.85	9	9	583.59	2	2	4		35148	Retinol dehydrogenase 11 OS=Mus musculus OX=10090 GN=Rdh11 PE=1 SV=2
1251	7942	Q8BK72|RT27_MOUSE	87.79	7	7	353.11	2	2	3	Carbamidomethylation	47779	28S ribosomal protein S27 mitochondrial OS=Mus musculus OX=10090 GN=Mrps27 PE=1 SV=2
966	384	Q8R4U7|LUZP1_MOUSE	87.79	3	3	42493	3	3	5		119311	Leucine zipper protein 1 OS=Mus musculus OX=10090 GN=Luzp1 PE=1 SV=2
816	952	Q9EQS3|MYCBP_MOUSE	87.35	20	20	1413.7	2	2	7		11970	c-Myc-binding protein OS=Mus musculus OX=10090 GN=Mycbp PE=1 SV=5
1129	1691	P56135|ATPK_MOUSE	87.31	24	24	4457.3	2	2	4	Acetylation (Protein N-term)	10344	ATP synthase subunit f mitochondrial OS=Mus musculus OX=10090 GN=Atp5mf PE=1 SV=3
1408	1450	P35278|RAB5C_MOUSE	87.17	12	12	341.88	2	1	2		23412	Ras-related protein Rab-5C OS=Mus musculus OX=10090 GN=Rab5c PE=1 SV=2
1162	1636	Q8R1F1|NIBA2_MOUSE	87.08	4	4	337.62	2	2	3		84819	Protein Niban 2 OS=Mus musculus OX=10090 GN=Niban2 PE=1 SV=2
1254	1593	Q923G2|RPAB3_MOUSE	87.06	18	18	1440	2	2	3		17143	DNA-directed RNA polymerases I II and III subunit RPABC3 OS=Mus musculus OX=10090 GN=Polr2h PE=1 SV=3
1515	1407	Q8QZY9|SF3B4_MOUSE	87.04	3	3	5759.7	1	1	2		44356	Splicing factor 3B subunit 4 OS=Mus musculus OX=10090 GN=Sf3b4 PE=1 SV=1
1309	10980	Q80TV8|CLAP1_MOUSE	87	2	2	0	2	2	2		169227	CLIP-associating protein 1 OS=Mus musculus OX=10090 GN=Clasp1 PE=1 SV=2
1137	1559	Q9DCJ7|AKIP_MOUSE	86.82	7	7	940.23	2	2	4		23300	Aurora kinase A-interacting protein OS=Mus musculus OX=10090 GN=Aurkaip1 PE=2 SV=2
1255	27838	Q9JIW9|RALB_MOUSE	86.77	12	12	0	2	1	3		23349	Ras-related protein Ral-B OS=Mus musculus OX=10090 GN=Ralb PE=1 SV=1
969	16930	Q9D554|SF3A3_MOUSE	86.76	6	6	585.66	2	2	5	Acetylation (Protein N-term)	58842	Splicing factor 3A subunit 3 OS=Mus musculus OX=10090 GN=Sf3a3 PE=1 SV=2
1059	11874	Q9JJT0|RCL1_MOUSE	86.66	12	12	749.34	3	3	4	Carbamidomethylation; Acetylation (Protein N-term); Deamidation (NQ)	40841	RNA 3'-terminal phosphate cyclase-like protein OS=Mus musculus OX=10090 GN=Rcl1 PE=2 SV=1
663	255	Q91YU8|SSF1_MOUSE	86.64	8	8	2276.2	3	3	9	Deamidation (NQ)	52756	Suppressor of SWI4 1 homolog OS=Mus musculus OX=10090 GN=Ppan PE=1 SV=2
1049	16863	Q9WTK5|NFKB2_MOUSE	86.48	4	4	206.99	2	2	4	Carbamidomethylation	96832	Nuclear factor NF-kappa-B p100 subunit OS=Mus musculus OX=10090 GN=Nfkb2 PE=1 SV=1
1253	8277	Q6PHZ2|KCC2D_MOUSE	86.43	7	7	582.17	2	2	3		56369	Calcium/calmodulin-dependent protein kinase type II subunit delta OS=Mus musculus OX=10090 GN=Camk2d PE=1 SV=1
1842	1574	Q08024|PEBB_MOUSE	86.31	9	9	797.4	1	1	1		22030	Core-binding factor subunit beta OS=Mus musculus OX=10090 GN=Cbfb PE=1 SV=1
1386	7336	Q9D2D7|ZN687_MOUSE	86.28	2	2	646.51	2	2	2		130350	Zinc finger protein 687 OS=Mus musculus OX=10090 GN=Znf687 PE=1 SV=1
1080	1493	Q8BHS6|ARMX3_MOUSE	86.25	13	13	202.5	3	3	4	Carbamidomethylation	42620	Armadillo repeat-containing X-linked protein 3 OS=Mus musculus OX=10090 GN=Armcx3 PE=1 SV=1
1826	1411	P15066|JUND_MOUSE	86.12	4	4	564.9	1	1	1		34905	Transcription factor jun-D OS=Mus musculus OX=10090 GN=Jund PE=1 SV=1
1501	1473	Q9DCX2|ATP5H_MOUSE	86.1	16	16	124.43	2	2	2	Carbamidomethylation	18749	ATP synthase subunit d mitochondrial OS=Mus musculus OX=10090 GN=Atp5pd PE=1 SV=3
1276	1367	P01644|KV5AB_MOUSE	86.07	17	17	897.75	1	1	3	Oxidation (M)	11910	Ig kappa chain V-V region HP R16.7 OS=Mus musculus OX=10090 PE=1 SV=1
1276	1369	P01645|KV5AC_MOUSE	86.07	17	17	897.75	1	1	3	Oxidation (M)	11954	Ig kappa chain V-V region HP 93G7 OS=Mus musculus OX=10090 PE=1 SV=1
1276	1370	P01643|KV5AA_MOUSE	86.07	17	17	897.75	1	1	3	Oxidation (M)	11819	Ig kappa chain V-V region MOPC 173 OS=Mus musculus OX=10090 PE=1 SV=1
1276	1368	P01647|KV5AE_MOUSE	86.07	17	17	897.75	1	1	3	Oxidation (M)	11965	Ig kappa chain V-V region HP 124E1 OS=Mus musculus OX=10090 PE=1 SV=1
1202	7969	Q04207|TF65_MOUSE	85.87	7	7	485.59	3	3	3	Carbamidomethylation; Deamidation (NQ)	60212	Transcription factor p65 OS=Mus musculus OX=10090 GN=Rela PE=1 SV=1
1171	601	P11276|FINC_MOUSE	85.79	1	1	125.16	2	2	3		272536	Fibronectin OS=Mus musculus OX=10090 GN=Fn1 PE=1 SV=4
1474	1544	Q9CY50|SSRA_MOUSE	85.58	9	9	443.61	2	2	2		32065	Translocon-associated protein subunit alpha OS=Mus musculus OX=10090 GN=Ssr1 PE=1 SV=1
1490	10897	A2AMM0|CAVN4_MOUSE	85.19	7	7	396.75	2	2	2		41008	Caveolae-associated protein 4 OS=Mus musculus OX=10090 GN=Cavin4 PE=1 SV=1
1215	16983	Q61286|HTF4_MOUSE	85.14	5	5	74.234	2	2	3		75811	Transcription factor 12 OS=Mus musculus OX=10090 GN=Tcf12 PE=1 SV=2
1827	11485	Q9D945|LLPH_MOUSE	84.93	11	11	1201.7	1	1	1		15391	Protein LLP homolog OS=Mus musculus OX=10090 GN=Llph PE=1 SV=1
1060	16817	Q9R0U0|SRS10_MOUSE	84.7	13	13	7519.4	3	3	4		31301	Serine/arginine-rich splicing factor 10 OS=Mus musculus OX=10090 GN=Srsf10 PE=1 SV=2
1147	3397	Q6P4S6|SIK3_MOUSE	84.69	2	2	749.3	2	2	3	Carbamidomethylation	145783	Serine/threonine-protein kinase SIK3 OS=Mus musculus OX=10090 GN=Sik3 PE=1 SV=3
1130	27843	Q60739|BAG1_MOUSE	84.63	7	7	528.63	2	2	4		39740	BAG family molecular chaperone regulator 1 OS=Mus musculus OX=10090 GN=Bag1 PE=1 SV=3
1274	17639	Q7TS63|ZFAT_MOUSE	84.61	3	3	122.51	2	2	3	Carbamidomethylation	137883	Zinc finger protein ZFAT OS=Mus musculus OX=10090 GN=Zfat PE=1 SV=2
986	20463	Q9WUP7|UCHL5_MOUSE	84.58	10	10	706.01	3	3	5		37617	Ubiquitin carboxyl-terminal hydrolase isozyme L5 OS=Mus musculus OX=10090 GN=Uchl5 PE=1 SV=2
1507	7940	Q9JK92|HSPB8_MOUSE	84.58	12	12	640.96	2	2	2	Carbamidomethylation; Acetylation (Protein N-term)	21533	Heat shock protein beta-8 OS=Mus musculus OX=10090 GN=Hspb8 PE=1 SV=1
1273	595	Q8R3C6|RBM19_MOUSE	84.54	3	3	628.37	2	2	3		106083	Probable RNA-binding protein 19 OS=Mus musculus OX=10090 GN=Rbm19 PE=1 SV=1
1002	16789	Q3TYS2|CYBC1_MOUSE	84.51	12	12	624.5	3	3	5		20921	Cytochrome b-245 chaperone 1 OS=Mus musculus OX=10090 GN=Cybc1 PE=1 SV=2
1841	1138	Q9CXU1|MED31_MOUSE	84.45	13	13	487.78	1	1	1		15771	Mediator of RNA polymerase II transcription subunit 31 OS=Mus musculus OX=10090 GN=Med31 PE=1 SV=2
1394	8304	Q9D0N7|CAF1B_MOUSE	84.28	5	5	417.73	2	2	2		63132	Chromatin assembly factor 1 subunit B OS=Mus musculus OX=10090 GN=Chaf1b PE=1 SV=1
1510	1470	Q9JJZ6|KLF13_MOUSE	84.25	6	6	181.66	1	1	2		31136	Krueppel-like factor 13 OS=Mus musculus OX=10090 GN=Klf13 PE=1 SV=2
1056	1048	Q08775|RUNX2_MOUSE	83.99	5	5	986.9	3	2	4		66205	Runt-related transcription factor 2 OS=Mus musculus OX=10090 GN=Runx2 PE=1 SV=2
1472	10344	Q9WTR1|TRPV2_MOUSE	83.76	4	4	244.12	2	2	2		85965	Transient receptor potential cation channel subfamily V member 2 OS=Mus musculus OX=10090 GN=Trpv2 PE=1 SV=2
1473	7938	Q00612|G6PD1_MOUSE	83.59	6	6	48.195	2	2	2	Carbamidomethylation	59263	Glucose-6-phosphate 1-dehydrogenase X OS=Mus musculus OX=10090 GN=G6pdx PE=1 SV=3
1413	7782	Q3TEA8|HP1B3_MOUSE	83.57	2	2	300.86	1	1	2	Oxidation (M); Acetylation (Protein N-term)	60867	Heterochromatin protein 1-binding protein 3 OS=Mus musculus OX=10090 GN=Hp1bp3 PE=1 SV=1
1404	7428	Q9JM76|ARPC3_MOUSE	83.42	13	13	1449.7	2	2	2		20525	Actin-related protein 2/3 complex subunit 3 OS=Mus musculus OX=10090 GN=Arpc3 PE=1 SV=3
1820	1492	Q91W90|TXND5_MOUSE	82.91	4	4	817.4	1	1	1	Carbamidomethylation	46416	Thioredoxin domain-containing protein 5 OS=Mus musculus OX=10090 GN=Txndc5 PE=1 SV=2
1186	3618	Q6DID3|SCAF8_MOUSE	82.77	2	2	519.15	2	2	3		139572	SR-related and CTD-associated factor 8 OS=Mus musculus OX=10090 GN=Scaf8 PE=1 SV=1
1335	6399	P62196|PRS8_MOUSE	82.71	7	7	362.88	2	2	2	Acetylation (Protein N-term)	45626	26S proteasome regulatory subunit 8 OS=Mus musculus OX=10090 GN=Psmc5 PE=1 SV=1
1476	7448	Q9EST5|AN32B_MOUSE	82.68	8	8	1213.5	2	2	2	Carbamidomethylation	31079	Acidic leucine-rich nuclear phosphoprotein 32 family member B OS=Mus musculus OX=10090 GN=Anp32b PE=1 SV=1
1176	1994	Q3UYV9|NCBP1_MOUSE	82.67	5	5	1313.8	3	3	3	Carbamidomethylation	91927	Nuclear cap-binding protein subunit 1 OS=Mus musculus OX=10090 GN=Ncbp1 PE=1 SV=2
1385	7492	P09528|FRIH_MOUSE	82.6	12	12	1271.5	2	2	2		21067	Ferritin heavy chain OS=Mus musculus OX=10090 GN=Fth1 PE=1 SV=2
1054	982	Q99P88|NU155_MOUSE	82.56	4	4	764.05	3	3	4	Carbamidomethylation	155117	Nuclear pore complex protein Nup155 OS=Mus musculus OX=10090 GN=Nup155 PE=1 SV=1
1511	4610	Q9DBY5|CBX6_MOUSE	82.33	5	5	171.97	1	1	2		44460	Chromobox protein homolog 6 OS=Mus musculus OX=10090 GN=Cbx6 PE=1 SV=2
971	7943	P48755|FOSL1_MOUSE	82.33	20	20	705.66	2	2	5	Deamidation (NQ)	29800	Fos-related antigen 1 OS=Mus musculus OX=10090 GN=Fosl1 PE=2 SV=2
1022	1804	P70700|RPA2_MOUSE	82.22	2	2	552.25	2	2	4		128213	DNA-directed RNA polymerase I subunit RPA2 OS=Mus musculus OX=10090 GN=Polr1b PE=1 SV=2
1262	7947	P11031|TCP4_MOUSE	82.19	16	16	1394.3	2	2	3		14427	Activated RNA polymerase II transcriptional coactivator p15 OS=Mus musculus OX=10090 GN=Sub1 PE=1 SV=3
1483	4603	Q9CPQ5|CENPQ_MOUSE	81.89	8	8	234.36	2	2	2		30501	Centromere protein Q OS=Mus musculus OX=10090 GN=Cenpq PE=2 SV=2
1538	1499	Q9CQ49|NCBP2_MOUSE	81.86	7	7	2096	1	1	2		18017	Nuclear cap-binding protein subunit 2 OS=Mus musculus OX=10090 GN=Ncbp2 PE=1 SV=1
488	7685	P07724|ALBU_MOUSE	81.8	2	2	13901	1	1	15	Deamidation (NQ)	68693	Serum albumin OS=Mus musculus OX=10090 GN=Alb PE=1 SV=3
653	17045	Q9CQ69|QCR8_MOUSE	81.78	23	23	575.34	2	2	10		9768	Cytochrome b-c1 complex subunit 8 OS=Mus musculus OX=10090 GN=Uqcrq PE=1 SV=3
1277	7855	P62307|RUXF_MOUSE	81.5	15	15	6440.9	1	1	3	Oxidation (M)	9725	Small nuclear ribonucleoprotein F OS=Mus musculus OX=10090 GN=Snrpf PE=1 SV=1
1696	4134	Q3THK3|T2FA_MOUSE	81.26	3	3	403.17	1	1	1	Acetylation (Protein N-term)	57241	General transcription factor IIF subunit 1 OS=Mus musculus OX=10090 GN=Gtf2f1 PE=1 SV=2
1514	16899	Q9CQ39|MED21_MOUSE	80.88	10	10	787.54	1	1	2		15588	Mediator of RNA polymerase II transcription subunit 21 OS=Mus musculus OX=10090 GN=Med21 PE=1 SV=1
1388	1303	Q91YE7|RBM5_MOUSE	80.79	3	3	369.58	2	2	2		92311	RNA-binding protein 5 OS=Mus musculus OX=10090 GN=Rbm5 PE=1 SV=1
758	27921	Q9CWR7|STEA1_MOUSE	80.6	4	4	68.674	1	1	8	Oxidation (M); Acetylation (Protein N-term); Deamidation (NQ)	39292	Metalloreductase STEAP1 OS=Mus musculus OX=10090 GN=Steap1 PE=1 SV=2
723	16969	P59708|SF3B6_MOUSE	80.59	21	21	595.15	2	2	8	Carbamidomethylation	14585	Splicing factor 3B subunit 6 OS=Mus musculus OX=10090 GN=Sf3b6 PE=1 SV=1
1486	6811	Q9QYI5|DNJB2_MOUSE	80.57	7	7	181.27	2	1	2		35593	DnaJ homolog subfamily B member 2 OS=Mus musculus OX=10090 GN=Dnajb2 PE=1 SV=3
1480	16711	Q60953|PML_MOUSE	80.55	2	2	331.61	2	2	2	Carbamidomethylation	98242	Protein PML OS=Mus musculus OX=10090 GN=Pml PE=1 SV=3
1672	27856	P0C0A3|CHMP6_MOUSE	80.26	6	6	201.49	1	1	1		23416	Charged multivesicular body protein 6 OS=Mus musculus OX=10090 GN=Chmp6 PE=1 SV=2
1889	17267	Q9DCF9|SSRG_MOUSE	80.18	8	8	1144.5	1	1	1		21064	Translocon-associated protein subunit gamma OS=Mus musculus OX=10090 GN=Ssr3 PE=1 SV=1
1895	1488	P01636|KV5A4_MOUSE	80.16	12	12	856.63	1	1	1		12030	Ig kappa chain V-V region MOPC 149 OS=Mus musculus OX=10090 PE=1 SV=1
1301	386	Q9JHU4|DYHC1_MOUSE	80.16	1	1	304.5	2	2	2	Carbamidomethylation	532050	Cytoplasmic dynein 1 heavy chain 1 OS=Mus musculus OX=10090 GN=Dync1h1 PE=1 SV=2
1428	1980	Q9R045|ANGL2_MOUSE	80.05	3	3	279.34	1	1	2		57106	Angiopoietin-related protein 2 OS=Mus musculus OX=10090 GN=Angptl2 PE=2 SV=2
1886	2770	Q9QYI6|DNJB9_MOUSE	80.04	7	7	198.82	1	1	1		25616	DnaJ homolog subfamily B member 9 OS=Mus musculus OX=10090 GN=Dnajb9 PE=1 SV=2
1420	17181	Q8C522|ENDD1_MOUSE	80.02	3	3	697.82	1	1	2		55262	Endonuclease domain-containing 1 protein OS=Mus musculus OX=10090 GN=Endod1 PE=1 SV=2
1892	17280	Q91ZP6|NFIP2_MOUSE	79.93	5	5	182.05	1	1	1		33638	NEDD4 family-interacting protein 2 (Fragment) OS=Mus musculus OX=10090 GN=Ndfip2 PE=1 SV=2
1238	1641	Q8C181|MBNL2_MOUSE	79.88	8	8	877.26	3	2	3	Carbamidomethylation; Acetylation (Protein N-term)	40156	Muscleblind-like protein 2 OS=Mus musculus OX=10090 GN=Mbnl2 PE=2 SV=2
1492	8707	O70311|NMT2_MOUSE	79.61	5	5	0	2	2	2	Carbamidomethylation	60484	Glycylpeptide N-tetradecanoyltransferase 2 OS=Mus musculus OX=10090 GN=Nmt2 PE=1 SV=1
965	17764	Q8C4M7|CENPU_MOUSE	79.61	7	7	394.34	2	2	5	Carbamidomethylation	46371	Centromere protein U OS=Mus musculus OX=10090 GN=Cenpu PE=1 SV=2
1887	8042	Q8VI36|PAXI_MOUSE	79.58	3	3	190.16	1	1	1	Carbamidomethylation	64476	Paxillin OS=Mus musculus OX=10090 GN=Pxn PE=1 SV=1
1759	27851	Q9JJ00|PLS1_MOUSE	79.54	4	4	100.8	1	1	1	Carbamidomethylation	35914	Phospholipid scramblase 1 OS=Mus musculus OX=10090 GN=Plscr1 PE=1 SV=1
1797	27873	P04925|PRIO_MOUSE	79.53	5	5	212.49	1	1	1	Carbamidomethylation	27977	Major prion protein OS=Mus musculus OX=10090 GN=Prnp PE=1 SV=2
1314	3325	Q8C2E7|WASC5_MOUSE	79.43	2	2	59.182	2	2	2	Carbamidomethylation	134110	WASH complex subunit 5 OS=Mus musculus OX=10090 GN=Washc5 PE=1 SV=2
1221	5445	Q8R4R6|NUP35_MOUSE	79.41	6	6	159.34	1	1	3		34786	Nucleoporin NUP35 OS=Mus musculus OX=10090 GN=Nup35 PE=1 SV=2
1256	7924	Q9DD03|RAB13_MOUSE	79.32	12	12	187.81	2	1	3		22770	Ras-related protein Rab-13 OS=Mus musculus OX=10090 GN=Rab13 PE=1 SV=1
1361	7596	Q99KX1|MLF2_MOUSE	79.24	5	5	422.76	1	1	2		28055	Myeloid leukemia factor 2 OS=Mus musculus OX=10090 GN=Mlf2 PE=1 SV=1
1640	975	Q80UW8|RPAB1_MOUSE	79.2	7	7	777.14	1	1	1		24570	DNA-directed RNA polymerases I II and III subunit RPABC1 OS=Mus musculus OX=10090 GN=Polr2e PE=1 SV=1
1847	1512	Q8VBV3|EXOS2_MOUSE	78.93	4	4	396.98	1	1	1		32632	Exosome complex component RRP4 OS=Mus musculus OX=10090 GN=Exosc2 PE=1 SV=1
1267	5103	Q99LI8|HGS_MOUSE	78.9	3	3	746.62	2	2	3	Carbamidomethylation	86015	Hepatocyte growth factor-regulated tyrosine kinase substrate OS=Mus musculus OX=10090 GN=Hgs PE=1 SV=2
1001	17314	P62305|RUXE_MOUSE	78.8	25	25	4484.4	2	2	5		10804	Small nuclear ribonucleoprotein E OS=Mus musculus OX=10090 GN=Snrpe PE=1 SV=1
1327	8131	Q5XG73|ACBD5_MOUSE	78.8	4	4	263.59	1	1	2		56614	Acyl-CoA-binding domain-containing protein 5 OS=Mus musculus OX=10090 GN=Acbd5 PE=1 SV=1
1832	10927	Q8BR65|SDS3_MOUSE	78.78	5	5	228.3	1	1	1		38107	Sin3 histone deacetylase corepressor complex component SDS3 OS=Mus musculus OX=10090 GN=Suds3 PE=1 SV=1
1845	4417	O54784|DAPK3_MOUSE	78.5	3	3	139.18	1	1	1		51422	Death-associated protein kinase 3 OS=Mus musculus OX=10090 GN=Dapk3 PE=1 SV=1
1717	567	P28301|LYOX_MOUSE	78.49	3	3	809.49	1	1	1	Carbamidomethylation	46701	Protein-lysine 6-oxidase OS=Mus musculus OX=10090 GN=Lox PE=1 SV=1
1045	5981	Q9D662|SC23B_MOUSE	78.48	4	4	0	2	2	4	Carbamidomethylation; Acetylation (Protein N-term)	86437	Protein transport protein Sec23B OS=Mus musculus OX=10090 GN=Sec23b PE=1 SV=1
1051	27858	Q9Z172|SUMO3_MOUSE	78.41	11	11	1307.2	1	1	4		12430	Small ubiquitin-related modifier 3 OS=Mus musculus OX=10090 GN=Sumo3 PE=1 SV=1
1051	27872	P61957|SUMO2_MOUSE	78.41	13	13	1307.2	1	1	4		10871	Small ubiquitin-related modifier 2 OS=Mus musculus OX=10090 GN=Sumo2 PE=1 SV=1
1405	381	Q69ZR9|TASOR_MOUSE	78.31	2	2	783.22	2	2	2	Acetylation (Protein N-term)	181395	Protein TASOR OS=Mus musculus OX=10090 GN=Tasor PE=1 SV=2
1481	1518	P40124|CAP1_MOUSE	78.28	6	6	201.57	2	2	2	Acetylation (Protein N-term)	51565	Adenylyl cyclase-associated protein 1 OS=Mus musculus OX=10090 GN=Cap1 PE=1 SV=4
1928	1621	Q99J95|CDK9_MOUSE	78.09	3	3	335.95	1	1	1		42762	Cyclin-dependent kinase 9 OS=Mus musculus OX=10090 GN=Cdk9 PE=1 SV=1
1498	7133	Q9CQA5|MED4_MOUSE	77.92	7	7	499.21	2	2	2		29781	Mediator of RNA polymerase II transcription subunit 4 OS=Mus musculus OX=10090 GN=Med4 PE=2 SV=1
1259	18409	O54826|AF10_MOUSE	77.86	3	3	57.266	2	2	3		113029	Protein AF-10 OS=Mus musculus OX=10090 GN=Mllt10 PE=1 SV=2
1478	1522	Q9DB15|RM12_MOUSE	77.83	12	12	334.36	2	2	2		21708	39S ribosomal protein L12 mitochondrial OS=Mus musculus OX=10090 GN=Mrpl12 PE=1 SV=2
921	4871	Q9D0R2|SYTC_MOUSE	77.8	3	3	415.75	2	2	5		83356	Threonine--tRNA ligase 1 cytoplasmic OS=Mus musculus OX=10090 GN=Tars1 PE=1 SV=2
1448	16720	Q80YS6|AFAP1_MOUSE	77.78	2	2	259.45	1	1	2		80615	Actin filament-associated protein 1 OS=Mus musculus OX=10090 GN=Afap1 PE=1 SV=1
1657	1273	Q52KI8|SRRM1_MOUSE	77.73	2	2	172.84	1	1	1		106862	Serine/arginine repetitive matrix protein 1 OS=Mus musculus OX=10090 GN=Srrm1 PE=1 SV=2
1444	6759	Q4VC33|MAEA_MOUSE	77.49	4	4	85.231	1	1	2	Acetylation (Protein N-term)	45336	E3 ubiquitin-protein transferase MAEA OS=Mus musculus OX=10090 GN=Maea PE=1 SV=1
1332	7731	Q9CXW2|RT22_MOUSE	77.43	3	3	719.8	1	1	2		41192	28S ribosomal protein S22 mitochondrial OS=Mus musculus OX=10090 GN=Mrps22 PE=1 SV=1
1263	2908	Q91YN9|BAG2_MOUSE	77.4	10	10	421.41	2	2	3		23474	BAG family molecular chaperone regulator 2 OS=Mus musculus OX=10090 GN=Bag2 PE=1 SV=1
1159	8490	P97789|XRN1_MOUSE	77.3	1	1	0	1	1	3		194306	5'-3' exoribonuclease 1 OS=Mus musculus OX=10090 GN=Xrn1 PE=1 SV=1
1495	2491	O54734|OST48_MOUSE	77.3	5	5	487.91	2	2	2		49028	Dolichyl-diphosphooligosaccharide--protein glycosyltransferase 48 kDa subunit OS=Mus musculus OX=10090 GN=Ddost PE=1 SV=2
1216	7952	P61620|S61A1_MOUSE	77.18	5	5	933.9	2	2	3		52265	Protein transport protein Sec61 subunit alpha isoform 1 OS=Mus musculus OX=10090 GN=Sec61a1 PE=1 SV=2
1758	1517	Q60715|P4HA1_MOUSE	77.07	3	3	209.59	1	1	1		60910	Prolyl 4-hydroxylase subunit alpha-1 OS=Mus musculus OX=10090 GN=P4ha1 PE=1 SV=2
1336	10569	Q80UZ2|SDA1_MOUSE	77.05	3	3	594.34	2	2	2		79559	Protein SDA1 homolog OS=Mus musculus OX=10090 GN=Sdad1 PE=1 SV=1
1206	791	Q64727|VINC_MOUSE	76.92	3	3	814.96	2	2	3		116717	Vinculin OS=Mus musculus OX=10090 GN=Vcl PE=1 SV=4
1520	9966	P63013|PRRX1_MOUSE	76.91	5	5	297.08	1	1	2		27269	Paired mesoderm homeobox protein 1 OS=Mus musculus OX=10090 GN=Prrx1 PE=1 SV=1
1520	9967	Q06348|PRRX2_MOUSE	76.91	5	5	297.08	1	1	2		26427	Paired mesoderm homeobox protein 2 OS=Mus musculus OX=10090 GN=Prrx2 PE=2 SV=2
803	18402	Q9DB91|MED29_MOUSE	76.85	9	9	379.61	1	1	7	Deamidation (NQ)	21011	Mediator of RNA polymerase II transcription subunit 29 OS=Mus musculus OX=10090 GN=Med29 PE=2 SV=1
1505	4509	Q8VDQ9|KRI1_MOUSE	76.78	4	4	126.76	2	2	2	Carbamidomethylation	82058	Protein KRI1 homolog OS=Mus musculus OX=10090 GN=Kri1 PE=1 SV=3
1212	4253	Q4VAC9|PKHG3_MOUSE	76.77	3	3	120.3	2	2	3		148519	Pleckstrin homology domain-containing family G member 3 OS=Mus musculus OX=10090 GN=Plekhg3 PE=1 SV=2
1265	8319	O88811|STAM2_MOUSE	76.77	4	4	701.78	2	2	3		57455	Signal transducing adapter molecule 2 OS=Mus musculus OX=10090 GN=Stam2 PE=1 SV=1
1888	16977	Q9Z266|SNAPN_MOUSE	76.57	15	15	61.312	1	1	1	Acetylation (Protein N-term)	14904	SNARE-associated protein Snapin OS=Mus musculus OX=10090 GN=Snapin PE=1 SV=1
1513	730	Q9DBG9|TX1B3_MOUSE	76.39	14	14	219.22	1	1	2		13723	Tax1-binding protein 3 OS=Mus musculus OX=10090 GN=Tax1bp3 PE=1 SV=1
1431	7902	Q8VDW0|DX39A_MOUSE	76.35	3	3	405.26	1	1	2		49067	ATP-dependent RNA helicase DDX39A OS=Mus musculus OX=10090 GN=Ddx39a PE=1 SV=1
1098	17356	P62309|RUXG_MOUSE	76.12	17	17	51.389	2	2	4		8496	Small nuclear ribonucleoprotein G OS=Mus musculus OX=10090 GN=Snrpg PE=1 SV=1
1343	5450	Q99K90|TAB2_MOUSE	75.99	2	2	273.64	1	1	2		76442	TGF-beta-activated kinase 1 and MAP3K7-binding protein 2 OS=Mus musculus OX=10090 GN=Tab2 PE=1 SV=1
1814	16813	Q3UQU0|BRD9_MOUSE	75.91	3	3	143.79	1	1	1		66840	Bromodomain-containing protein 9 OS=Mus musculus OX=10090 GN=Brd9 PE=1 SV=1
1890	7979	P35456|UPAR_MOUSE	75.68	5	5	0	1	1	1	Carbamidomethylation	35428	Urokinase plasminogen activator surface receptor OS=Mus musculus OX=10090 GN=Plaur PE=1 SV=1
1282	7083	O08573|LEG9_MOUSE	75.67	4	4	146.96	1	1	3		40036	Galectin-9 OS=Mus musculus OX=10090 GN=Lgals9 PE=1 SV=1
1421	1412	Q8BHL4|RAI3_MOUSE	75.54	4	4	2520.1	1	1	2		40101	Retinoic acid-induced protein 3 OS=Mus musculus OX=10090 GN=Gprc5a PE=1 SV=1
1128	7606	Q9CQW2|ARL8B_MOUSE	75.51	10	10	366.46	2	1	4		21539	ADP-ribosylation factor-like protein 8B OS=Mus musculus OX=10090 GN=Arl8b PE=1 SV=1
964	1642	Q921K9|BCL7B_MOUSE	75.47	24	24	762.46	3	2	5	Carbamidomethylation	22238	B-cell CLL/lymphoma 7 protein family member B OS=Mus musculus OX=10090 GN=Bcl7b PE=1 SV=1
1500	16769	Q9CY27|TECR_MOUSE	75.43	6	6	2160.2	2	2	2		36090	Very-long-chain enoyl-CoA reductase OS=Mus musculus OX=10090 GN=Tecr PE=1 SV=1
1156	16759	Q9JK30|ORC3_MOUSE	75.34	3	3	22614	2	2	3	Carbamidomethylation; Deamidation (NQ)	82342	Origin recognition complex subunit 3 OS=Mus musculus OX=10090 GN=Orc3 PE=1 SV=1
1175	1123	Q9WUA3|PFKAP_MOUSE	75.19	2	2	124.79	1	1	3	Oxidation (M)	85455	ATP-dependent 6-phosphofructokinase platelet type OS=Mus musculus OX=10090 GN=Pfkp PE=1 SV=1
1175	1101	P12382|PFKAL_MOUSE	75.19	2	2	124.79	1	1	3	Oxidation (M)	85360	ATP-dependent 6-phosphofructokinase liver type OS=Mus musculus OX=10090 GN=Pfkl PE=1 SV=4
1261	17392	P16254|SRP14_MOUSE	75.16	24	24	2307.8	2	2	3		12510	Signal recognition particle 14 kDa protein OS=Mus musculus OX=10090 GN=Srp14 PE=1 SV=1
1026	4448	Q6PIJ4|NFRKB_MOUSE	74.92	3	3	490.54	3	3	4		138764	Nuclear factor related to kappa-B-binding protein OS=Mus musculus OX=10090 GN=Nfrkb PE=1 SV=1
1131	18241	Q8VCY6|UTP6_MOUSE	74.66	3	3	1092.4	1	1	4		70429	U3 small nucleolar RNA-associated protein 6 homolog OS=Mus musculus OX=10090 GN=Utp6 PE=2 SV=1
1891	27929	P01806|HVM36_MOUSE	74.65	14	14	0	1	1	1		12911	Ig heavy chain V region 441 OS=Mus musculus OX=10090 PE=4 SV=1
1891	19169	P01811|HVM41_MOUSE	74.65	14	14	0	1	1	1		13001	Ig heavy chain V region UPC10 OS=Mus musculus OX=10090 PE=1 SV=1
1891	27930	P01808|HVM38_MOUSE	74.65	13	13	0	1	1	1		13169	Ig heavy chain V region T601 OS=Mus musculus OX=10090 PE=1 SV=1
1891	27931	P01807|HVM37_MOUSE	74.65	13	13	0	1	1	1		13246	Ig heavy chain V region X44 OS=Mus musculus OX=10090 PE=1 SV=1
1891	27932	P01810|HVM40_MOUSE	74.65	13	13	0	1	1	1		13240	Ig heavy chain V region J539 OS=Mus musculus OX=10090 PE=1 SV=1
1904	6084	Q8BHA0|IN80C_MOUSE	74.62	7	7	442.74	1	1	1		20405	INO80 complex subunit C OS=Mus musculus OX=10090 GN=Ino80c PE=1 SV=1
1894	9458	Q9WV30|NFAT5_MOUSE	74.6	1	1	110.79	1	1	1	Carbamidomethylation	165800	Nuclear factor of activated T-cells 5 OS=Mus musculus OX=10090 GN=Nfat5 PE=1 SV=2
1926	27945	Q8BJ90|ZN771_MOUSE	74.58	4	4	209.13	1	1	1		35767	Zinc finger protein 771 OS=Mus musculus OX=10090 GN=Znf771 PE=2 SV=1
1019	703	Q05512|MARK2_MOUSE	74.54	4	4	992.85	2	2	4		86306	Serine/threonine-protein kinase MARK2 OS=Mus musculus OX=10090 GN=Mark2 PE=1 SV=3
1900	27934	Q99K85|SERC_MOUSE	74.53	4	4	718.5	1	1	1		40473	Phosphoserine aminotransferase OS=Mus musculus OX=10090 GN=Psat1 PE=1 SV=1
1195	2074	Q9R0A0|PEX14_MOUSE	74.46	3	3	399.89	1	1	3		41208	Peroxisomal membrane protein PEX14 OS=Mus musculus OX=10090 GN=Pex14 PE=1 SV=1
1268	16794	Q9DBS1|TMM43_MOUSE	74.44	5	5	1434.7	2	2	3		44783	Transmembrane protein 43 OS=Mus musculus OX=10090 GN=Tmem43 PE=1 SV=1
1516	7900	O35326|SRSF5_MOUSE	74.38	6	6	1022.6	1	1	2		30891	Serine/arginine-rich splicing factor 5 OS=Mus musculus OX=10090 GN=Srsf5 PE=1 SV=2
1918	7867	Q9CPQ3|TOM22_MOUSE	74.31	8	8	117.22	1	1	1		15537	Mitochondrial import receptor subunit TOM22 homolog OS=Mus musculus OX=10090 GN=Tomm22 PE=1 SV=3
1278	16856	Q9JIK9|RT34_MOUSE	74.07	7	7	100.12	1	1	3	Deamidation (NQ)	25827	28S ribosomal protein S34 mitochondrial OS=Mus musculus OX=10090 GN=Mrps34 PE=1 SV=1
1833	12651	Q61214|DYR1A_MOUSE	73.84	2	2	396.89	1	1	1	Carbamidomethylation	85494	Dual specificity tyrosine-phosphorylation-regulated kinase 1A OS=Mus musculus OX=10090 GN=Dyrk1a PE=1 SV=1
1833	27941	Q9Z188|DYR1B_MOUSE	73.84	2	2	396.89	1	1	1	Carbamidomethylation	69178	Dual specificity tyrosine-phosphorylation-regulated kinase 1B OS=Mus musculus OX=10090 GN=Dyrk1b PE=1 SV=3
1417	7632	P10639|THIO_MOUSE	73.76	12	12	1236.6	1	1	2		11675	Thioredoxin OS=Mus musculus OX=10090 GN=Txn PE=1 SV=3
1110	1064	Q8BGQ7|SYAC_MOUSE	73.71	4	4	8656.7	3	3	4	Carbamidomethylation	106908	Alanine--tRNA ligase cytoplasmic OS=Mus musculus OX=10090 GN=Aars1 PE=1 SV=1
[truncated: 567 more rows]

## Sheet: unique protein in flag-YTHDC1
Suppl. Table S5. Co-IP/MS identifies YTHDC1 Interacting Proteins in C2C12 Myoblasts
[truncated: 914 more rows]
